# Supplementary material for: Genetic profiling of protein burden and nuclear export overload
Source: eLife journal article supplement (doi:10.7554/elife.54080), 2020-11-04
Supplement: supp [file elife-54080-supp-v1.zip]

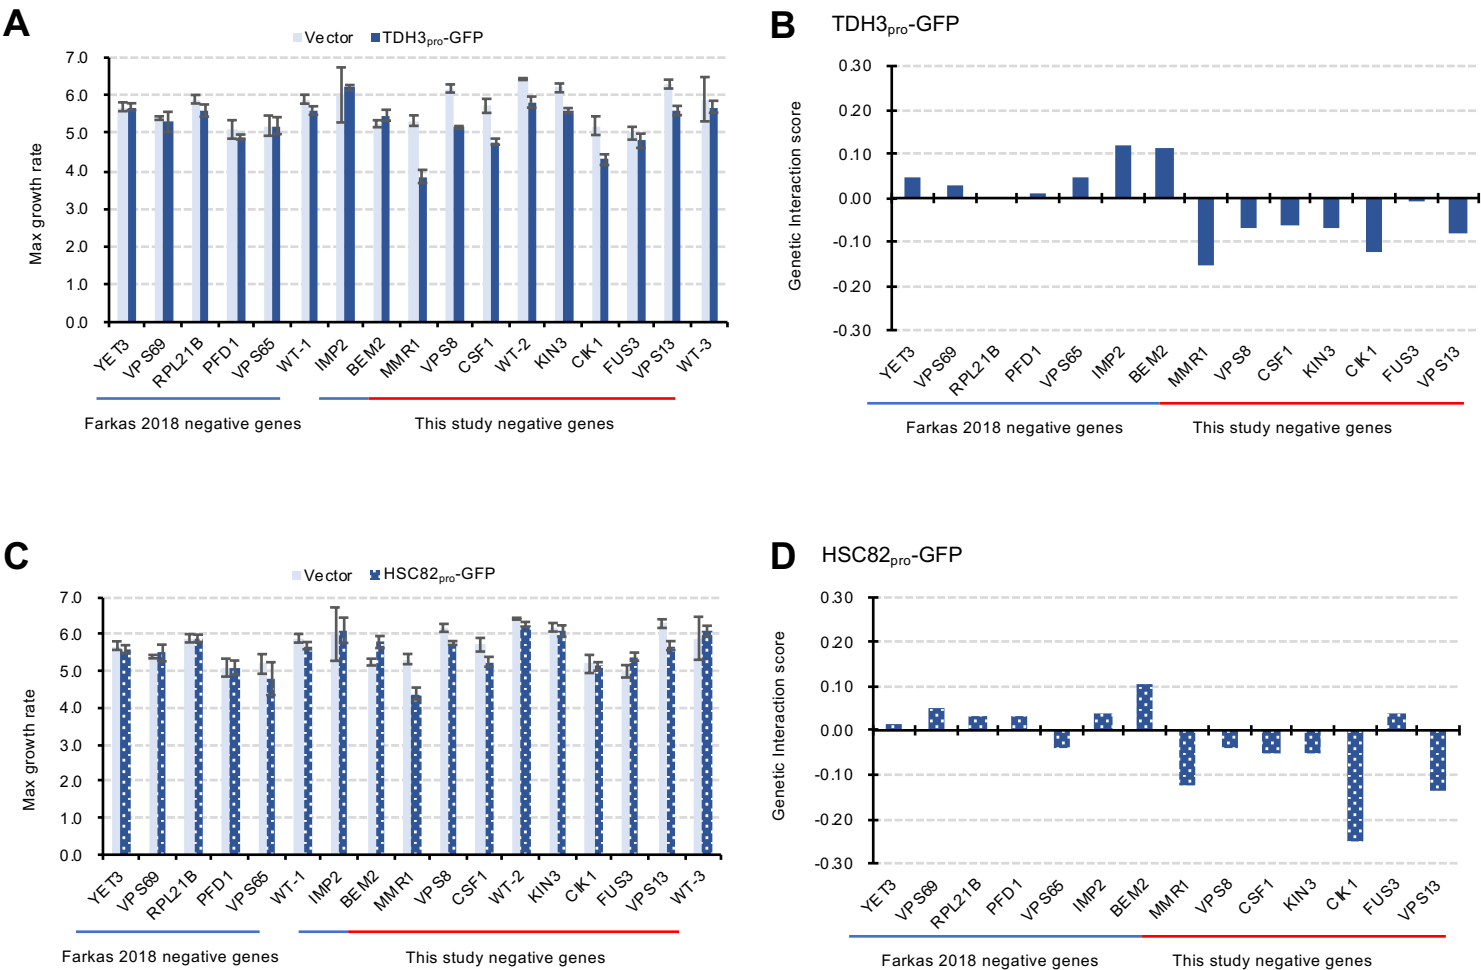

$$\text{Genetic interaction score } (\epsilon) = W_{AB} - W_A \times W_B$$

$W_{AB}$ : GFP-op / mutant fitness difference,  $W_A$ : GFP-op / WT fitness difference,  $W_B$ : Vector / mutant fitness difference
