# Supplementary material for: Genetic profiling of protein burden and nuclear export overload
Source: eLife journal article supplement (doi:10.7554/elife.54080), 2020-11-04

Figure 5-figure supplement 1

**A**

RanGTP-binding  
proteins  
(PMID:12578832)

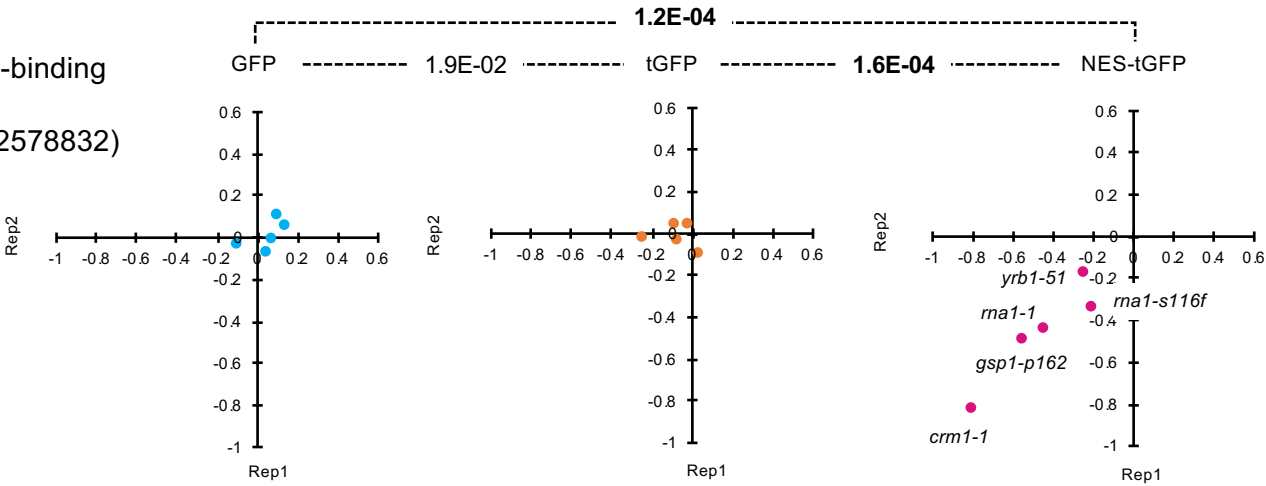

**B**

Proteasome complex  
(GO:0000502)

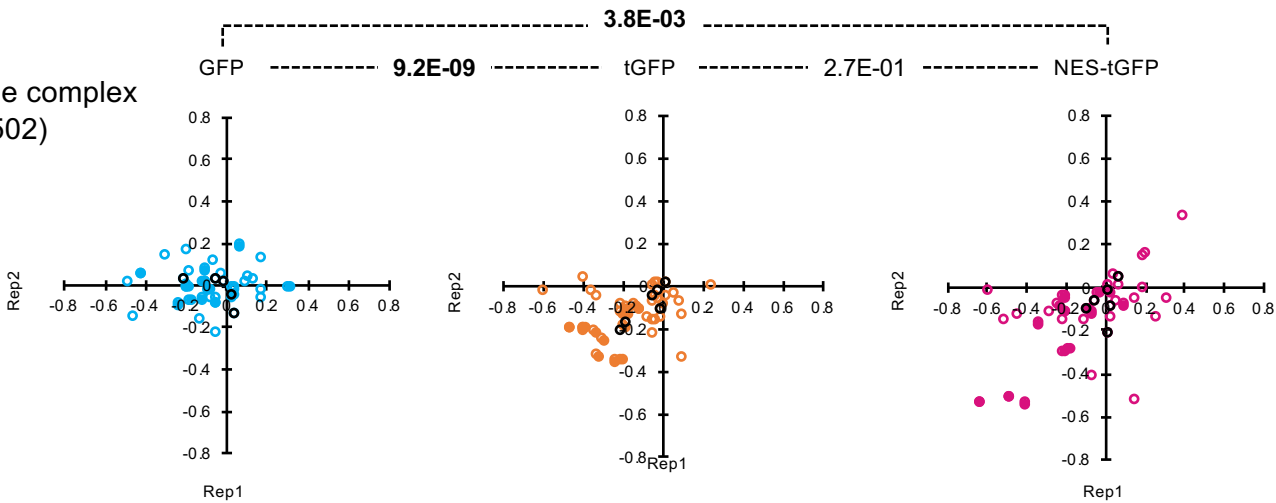

**C**

Cellular bud  
(GO:0005933)

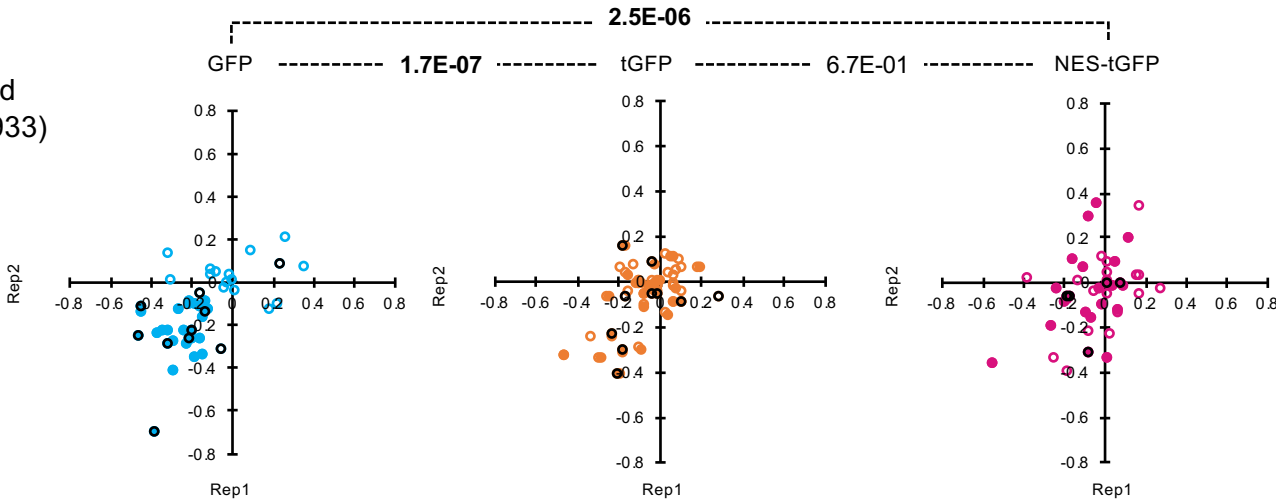

**D**

RNA polymerase II  
transcription factor  
complex  
(PMID:27610567)

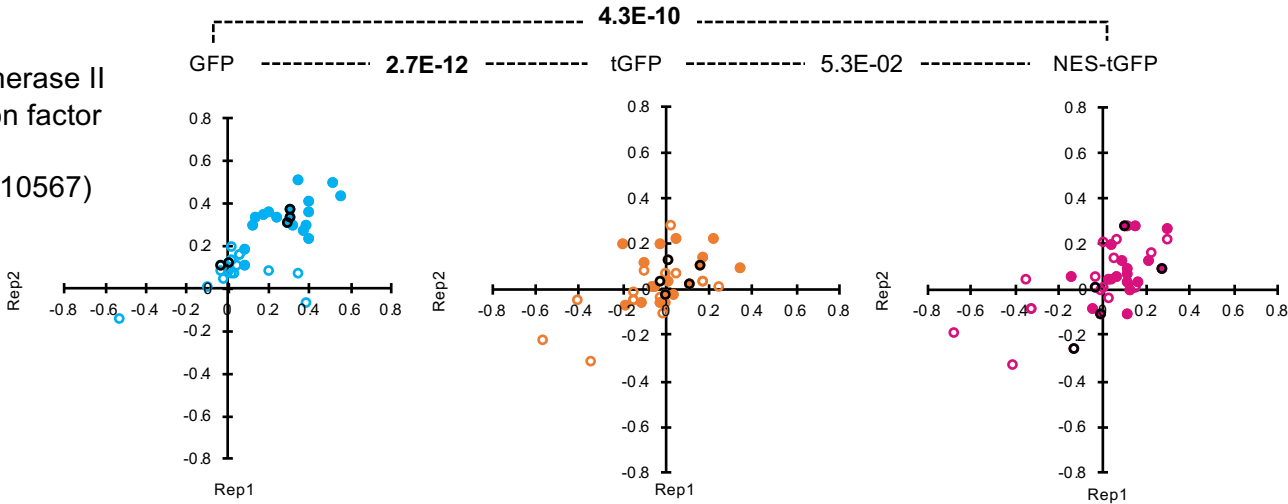

Supplement: supp [file elife-54080-supp-v1.zip]
