# Supplementary material for: Genetic profiling of protein burden and nuclear export overload
Source: eLife journal article supplement (doi:10.7554/elife.54080), 2020-11-04

**A** Genetic interaction score ( $\epsilon$ ) =  $W_{AB} - W_A \times W_B$

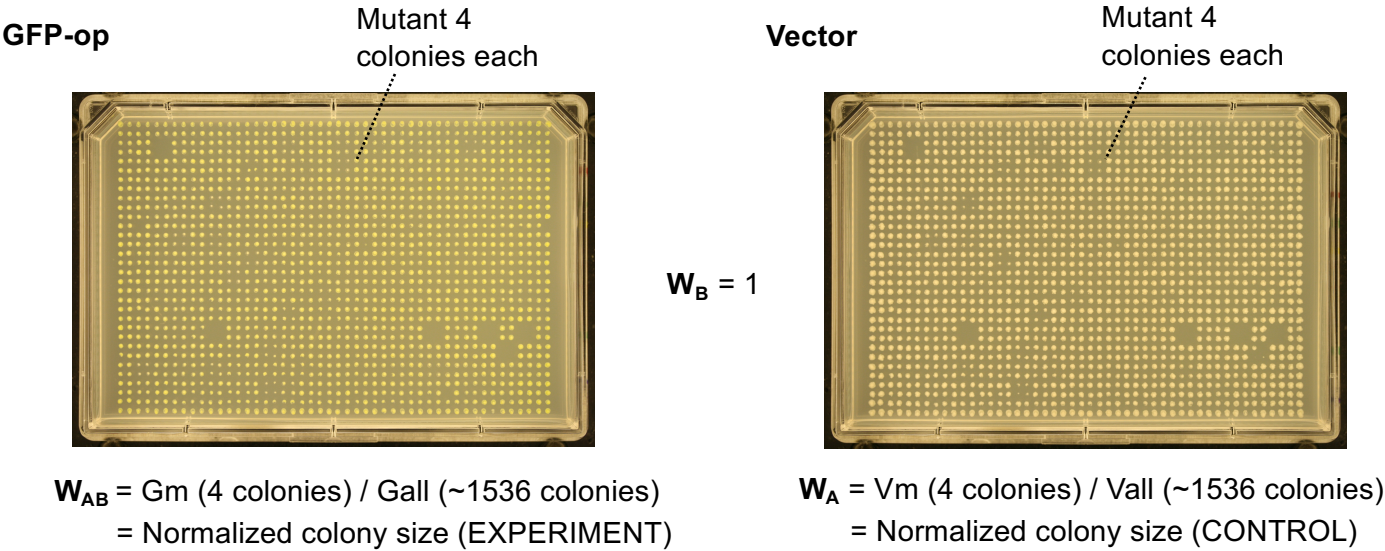

**B** *mmr1* $\Delta$ : Example of a GFP-op<sub>negative</sub> mutant

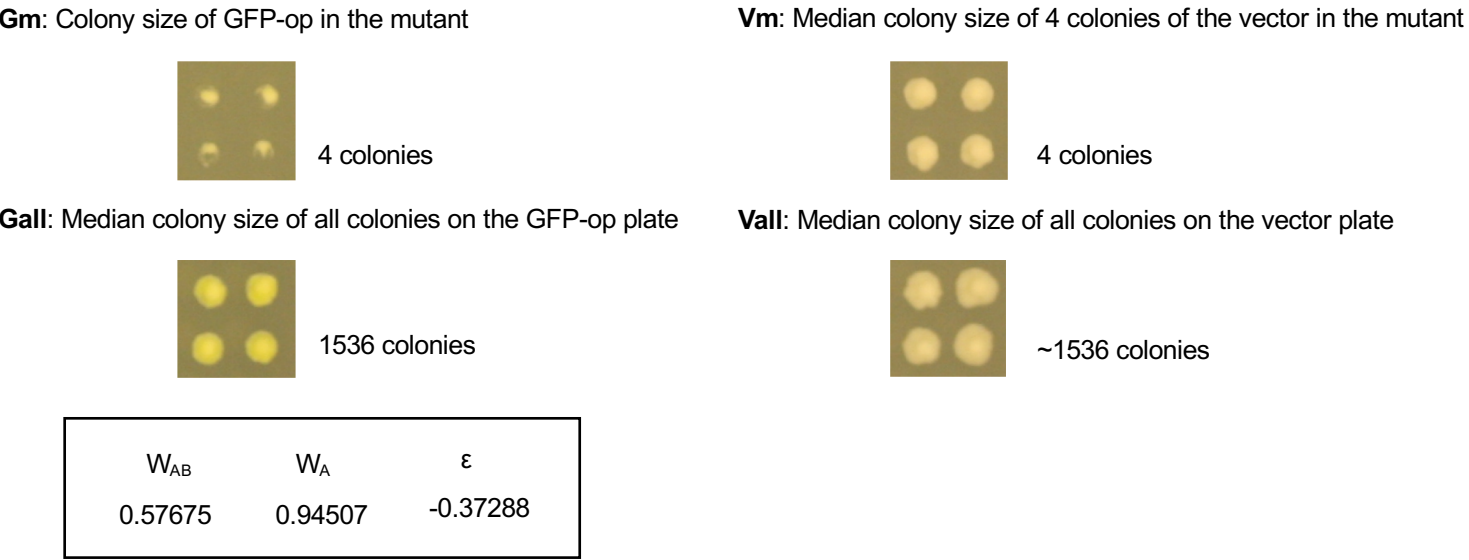

**C** *yjl175w* $\Delta$ : Example of a GFP-op<sub>positive</sub> mutant

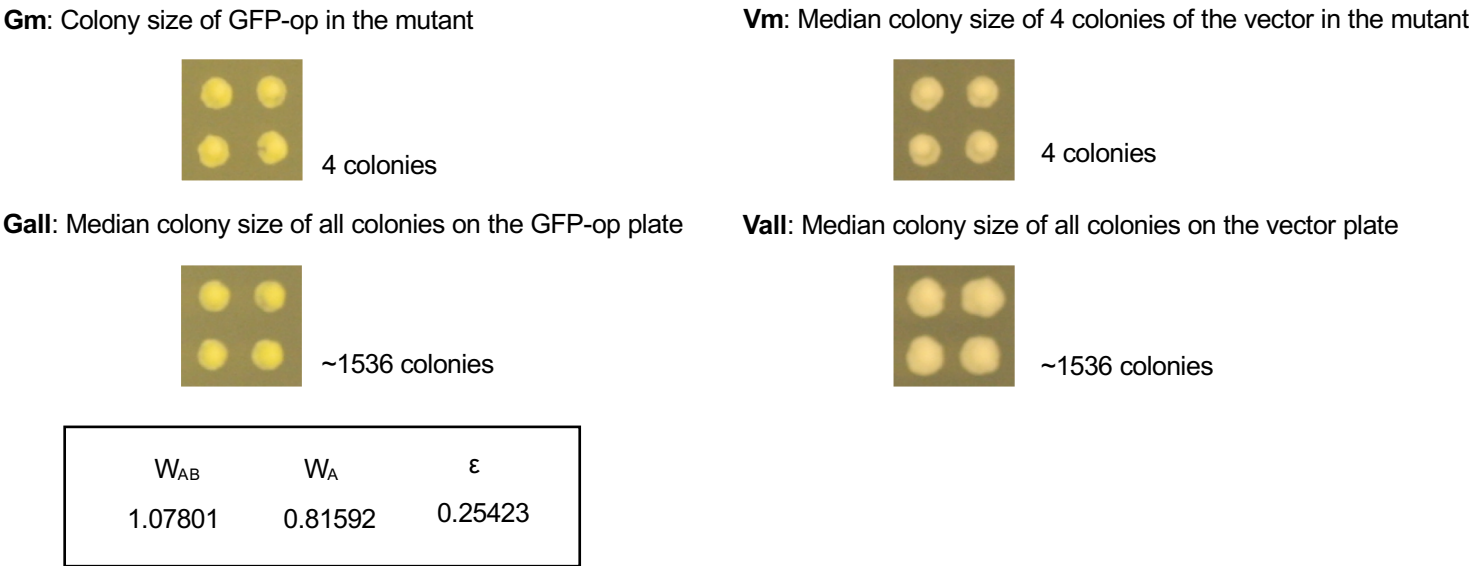

Supplement: supp [file elife-54080-supp-v1.zip]
