# Supplementary material for: Genetic profiling of protein burden and nuclear export overload
Source: eLife journal article supplement (doi:10.7554/elife.54080), 2020-11-04

**A** Vector control experiments

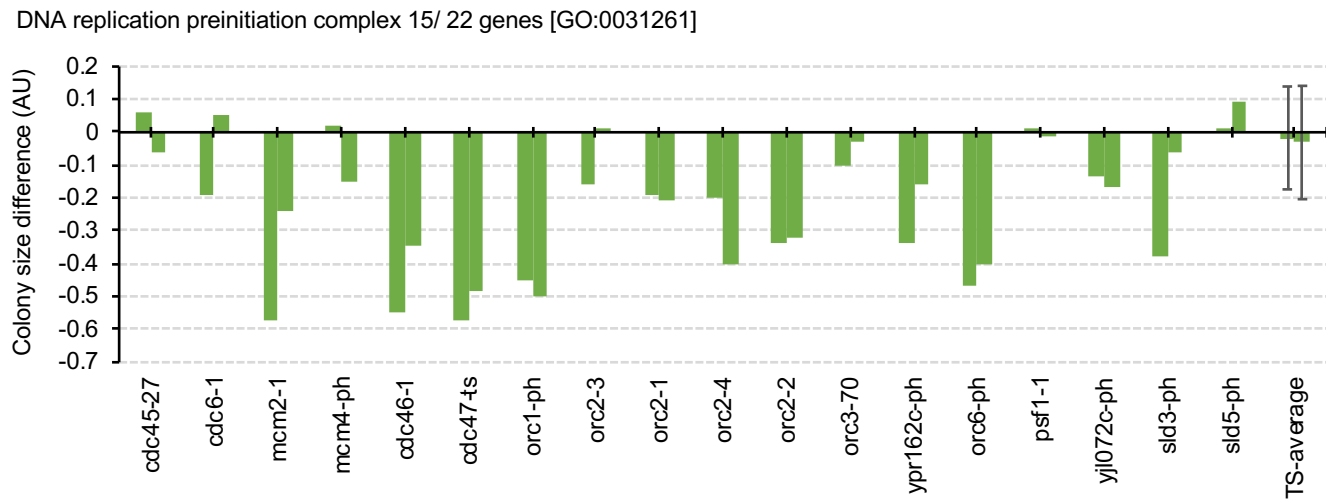

**B** Vector control experiments

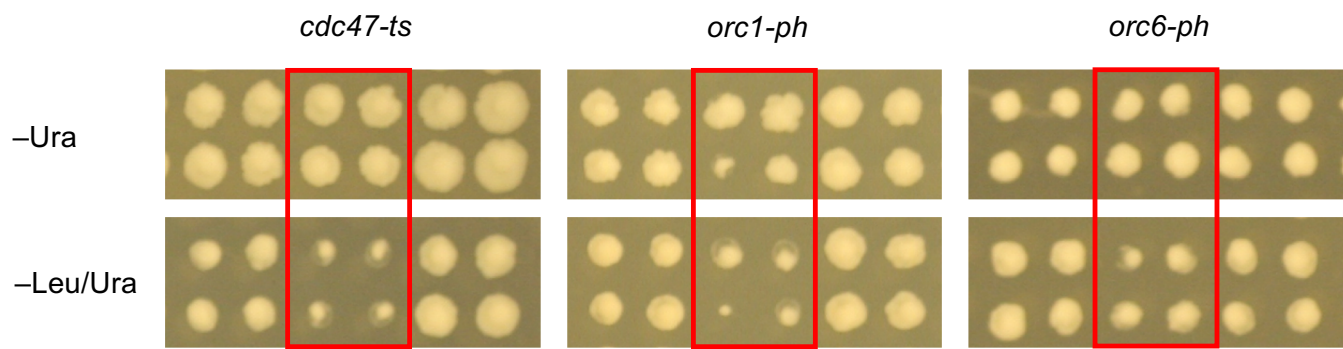

**C** Explanation of the fitness reduction

in WT

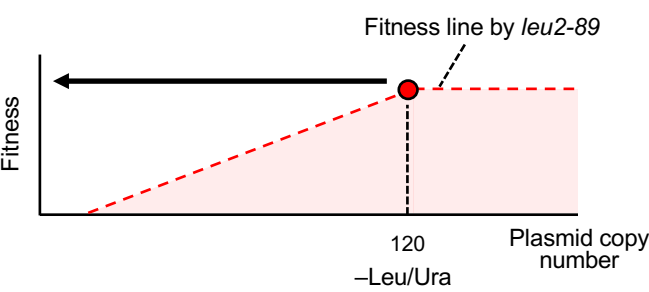

in DNA replication mutants

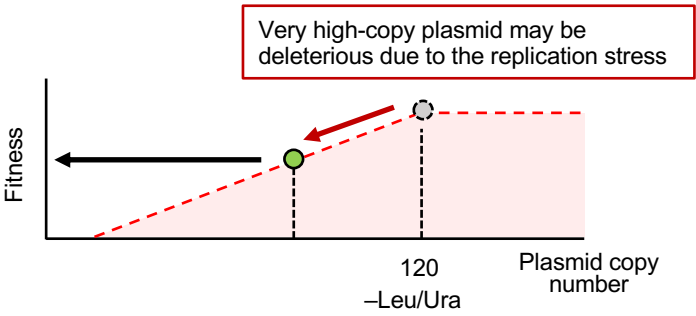

Supplement: supp [file elife-54080-supp-v1.zip]
