# Supplementary material for: Genetic profiling of protein burden and nuclear export overload
Source: eLife journal article supplement (doi:10.7554/elife.54080), 2020-11-04

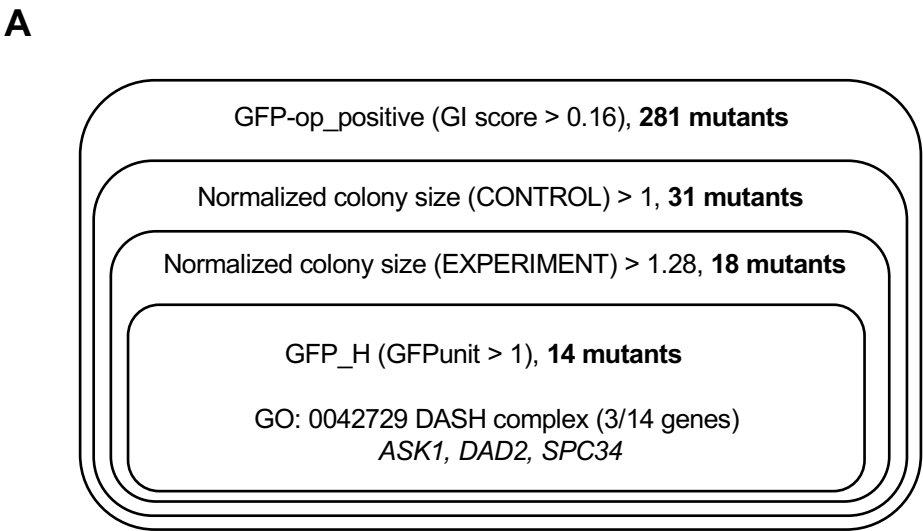

**B**

| Mutant name           |
|-----------------------|
| <i>cdc11-1</i>        |
| <i>cus1-3</i>         |
| <b><i>ask1-2</i></b>  |
| <i>spc42-10</i>       |
| <b><i>spc34-5</i></b> |
| <i>taf8-7</i>         |
| <i>apc5-ca</i>        |
| <b><i>dad2-9</i></b>  |
| <i>apc2-8</i>         |
| <i>sec1-1</i>         |
| <i>pol1-13</i>        |
| <i>tsc11-1</i>        |
| <i>cdc24-2</i>        |
| <i>tfb1-1</i>         |

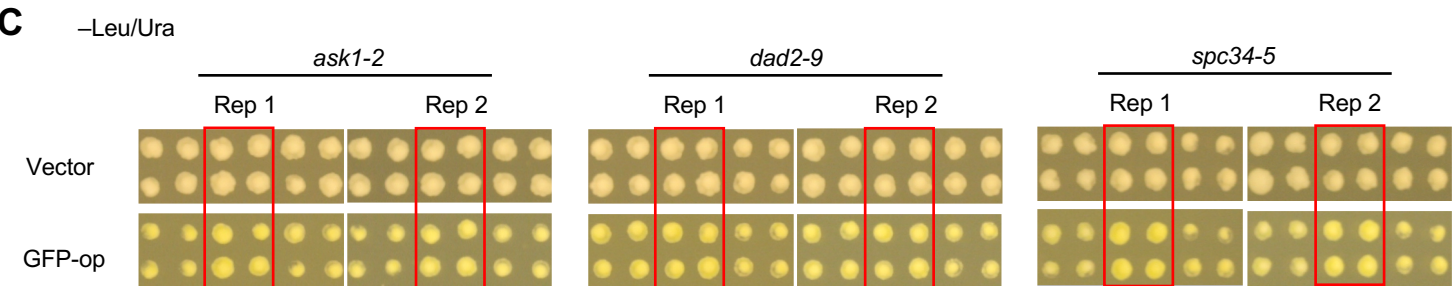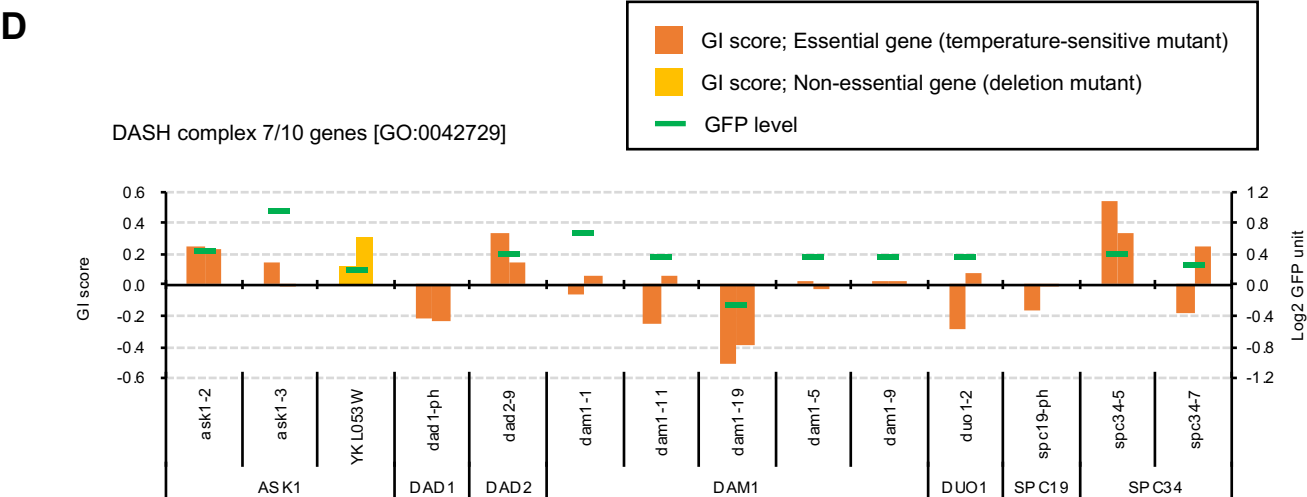

Supplement: supp [file elife-54080-supp-v1.zip]
