# Supplementary material for: Genetic profiling of protein burden and nuclear export overload
Source: eLife journal article supplement (doi:10.7554/elife.54080), 2020-11-04

A

| Genetic interaction ( $\epsilon$ ) | Negative ( <b>GFP-op_negative</b> ) |                         | Positive ( <b>GFP-op_positive</b> ) |                                 |
|------------------------------------|-------------------------------------|-------------------------|-------------------------------------|---------------------------------|
| GFP level (GFPunit)                | Low ( <b>GFP_L</b> )                | High ( <b>GFP_H</b> )   | Low ( <b>GFP_L</b> )                | High ( <b>GFP_H</b> )           |
| Interpretation                     | Sensitive to GFP overproduction     | Elevated GFP production | Reduced GFP production              | Resistant to GFP overproduction |

B

in GFP-op / mutant (**GFP-op\_negative**)

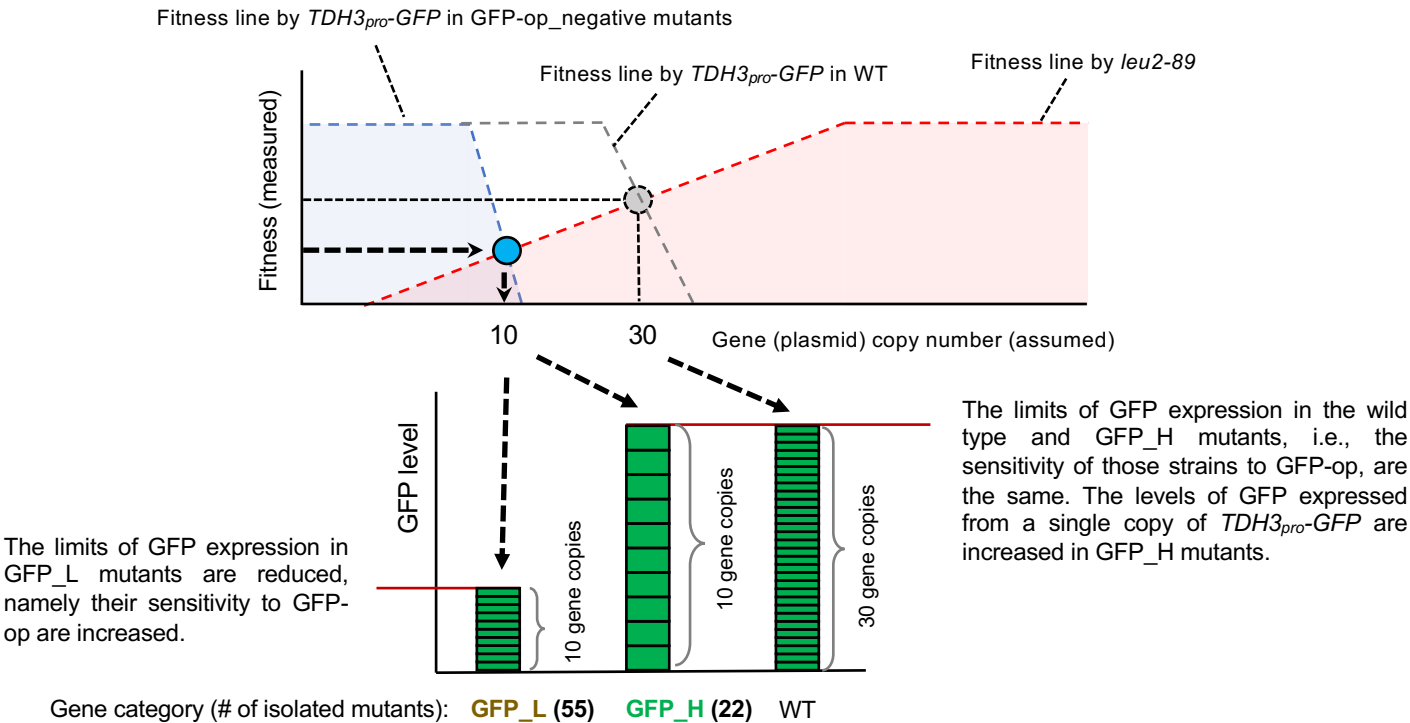

C

in GFP-op / mutant (**GFP-op\_positive**)

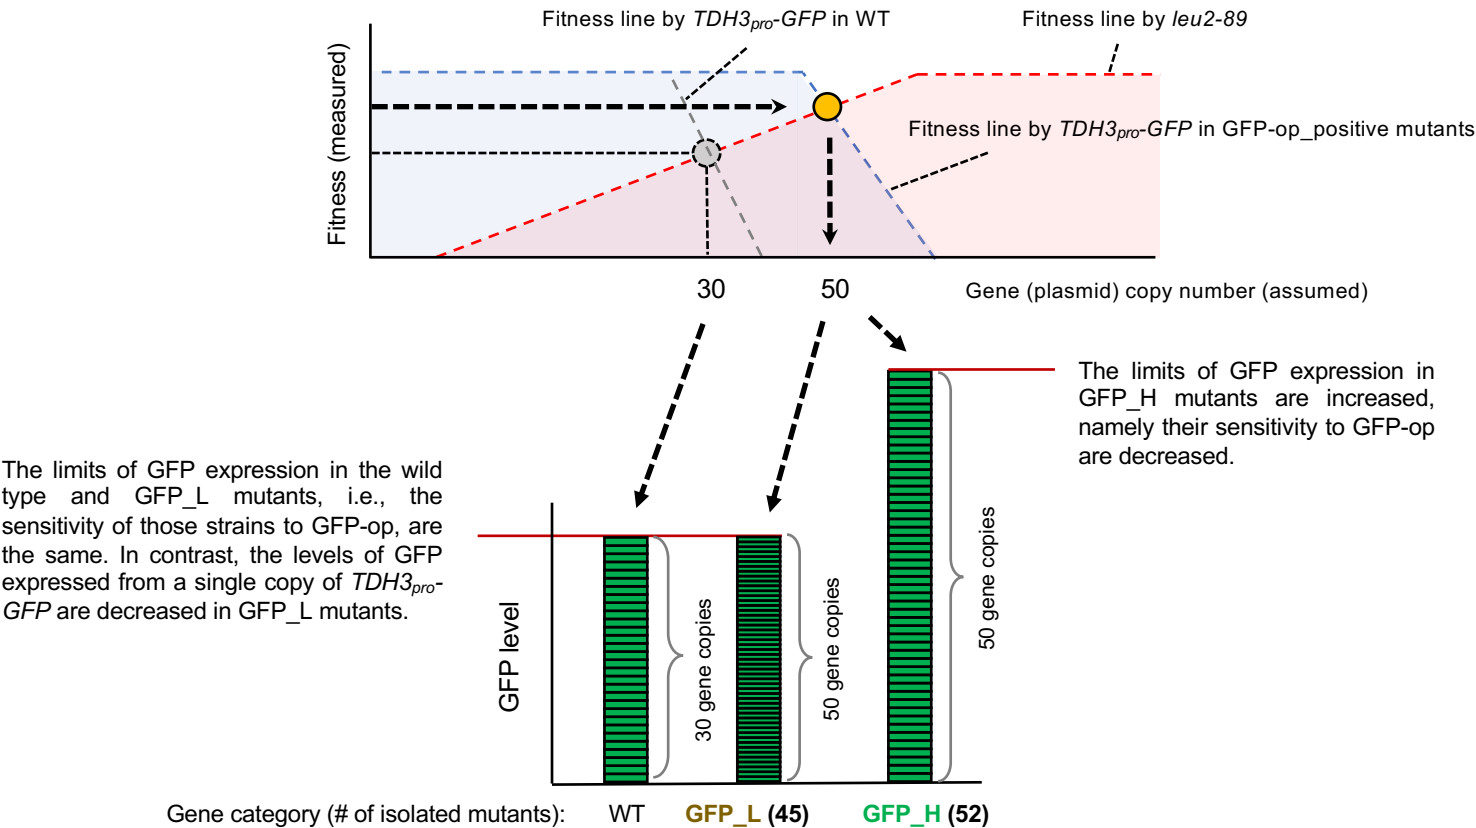

Supplement: supp [file elife-54080-supp-v1.zip]
