# Supplementary material for: Genetic profiling of protein burden and nuclear export overload
Source: eLife journal article supplement (doi:10.7554/elife.54080), 2020-11-04
Supplement: supp [file elife-54080-supp-v1.zip]

Archive with 27 entries (27 files):
- elife_poa_e54080_Transparent_Reporting_File.docx
- elife_poa_e54080_Figure_1_figure_supplement_1.pdf
- elife_poa_e54080_Figure_1_figure_supplement_2.pdf
- elife_poa_e54080_Figure_2_figure_supplement_1.pdf
- elife_poa_e54080_Figure_2_figure_supplement_2.pdf
- elife_poa_e54080_Figure_2_figure_supplement_3.pdf
- elife_poa_e54080_Figure_2_figure_supplement_4.pdf
- elife_poa_e54080_Figure_2_figure_supplement_5.pdf
- elife_poa_e54080_Figure_4_figure_supplement_1.pdf
- elife_poa_e54080_Figure_4_figure_supplement_2.pdf
- elife_poa_e54080_Figure_4_figure_supplement_3.pdf
- elife_poa_e54080_Figure_5_figure_supplement_1.pdf
- elife_poa_e54080_Figure_5_figure_supplement_2.pdf
- elife_poa_e54080_Figure_6_figure_supplement_1.pdf
- elife_poa_e54080_Figure_7_figure_supplement_1.pdf
- elife_poa_e54080_Figure_2_source_data_1.xlsx
- elife_poa_e54080_Figure_2_source_data_2.xlsx
- elife_poa_e54080_Figure_4_source_data_1.xlsx
- elife_poa_e54080_Figure_5_source_data_1.xlsx
- elife_poa_e54080_Figure_5_source_data_2.xlsx
- elife_poa_e54080_Figure_5_source_data_3.xlsx
- elife_poa_e54080_Figure_6_source_data_1.xlsx
- elife_poa_e54080_Figure_7_source_data_1.xlsx
- elife_poa_e54080_Supplementary_file_1.xlsx
- elife_poa_e54080_Supplementary_file_2.xlsx
- elife_poa_e54080_Supplementary_file_3.xlsx
- elife_poa_e54080_Supplementary_file_4.xlsx
