# Supplementary material for: Genetic profiling of protein burden and nuclear export overload
Source: eLife journal article supplement (doi:10.7554/elife.54080), 2020-11-04
Supplement: supp [file elife-54080-supp-v1.zip › elife_poa_e54080_Figure_2_source_data_1.xlsx]

## Sheet: DMA U Rep1
Array ORF	Array Name	Array annotation	Normalized colony size (EXPERIMENT)	Normalized colony std. dev. (EXPERIMENT)	Normalized colony size (CONTROL)	Normalized colony std. dev. (CONTROL)	Score	Score stdev	p-Value	Additional information
YAL002W	VPS8		0.82496	0.132	0.85791	0.204	-0.03823	0.131	0.00109
YAL004W	YAL004W		1.12817	0.064	1.04076	0.029	0.09224	0.064	5e-05
YAL005C	SSA1		0.97636	0.002	0.93947	0.064	0.04748	0.002	0	status=JK
YAL007C	ERP2		1.03361	0.1	1.08415	0.038	-0.04157	0.1	0.00025
YAL008W	FUN14		1.14383	0.057	1.17399	0.046	-0.03077	0.057	3e-05
YAL010C	MDM10		0.82883	0.018	0.8357	0.012	-0.00148	0.018	0
YAL011W	SWC3		0.8973	0.044	0.91146	0.043	-0.01747	0.044	3e-05
YAL013W	DEP1		0.80291	0.039	0.81129	0.054	0.00332	0.039	3e-05
YAL014C	SYN8		1.05145	0.087	1.0351	0.084	0.01686	0.087	0.00015
YAL015C	NTG1		1.05475	0.071	1.00493	0.05	0.03373	0.071	8e-05
YAL017W	PSK1		1.05687	0.129	1.08788	0.015	-0.02934	0.129	0.0005
YAL018C	YAL018C		1.0851	0.143	0.9817	0.049	0.09527	0.142	0.00062
YAL019W	FUN30		0.9019	0.033	0.92567	0.018	-0.02445	0.033	1e-05
YAL020C	ATS1		0.98496	0.102	1.06093	0.016	-0.08557	0.102	0.00031
YAL022C	FUN26		0.98536	0.062	0.96009	0.039	0.02752	0.062	7e-05
YAL023C	PMT2		1.08387	0.057	1.08739	0.047	-0.01114	0.057	4e-05
YAL024C	LTE1		0.77557	0.039	0.8918	0.128	-0.15979	0.039	3e-05
YAL026C	DRS2		0.69382	0.011	0.63636	0.072	0.06579	0.011	9e-05	status=JK
YAL027W	SAW1		1.11791	0.087	0.99956	0.036	0.1222	0.087	0.00013
YAL028W	FRT2		0.98668	0.008	0.95725	0.076	0.01041	0.008	2e-05	status=JK
YAL029C	MYO4		1.01769	0.073	1.03924	0.076	-0.0315	0.072	0.0001
YAL030W	SNC1		1.03784	0.029	0.95301	0.021	0.08429	0.029	1e-05
YAL031C	GIP4		0.94426	0.027	1.01634	0.012	-0.06599	0.027	1e-05
YAL034C	FUN19		1.07423	0.109	0.95769	0.152	0.136	0.109	0.00029
YAL036C	RBG1		1.04575	0.128	1.06017	0.046	-0.00472	0.127	0.00049
YAL037W	YAL037W		1.02714	0.039	1.03853	0.133	-0.02751	0.039	1e-05
YAL040C	CLN3		0.94423	0.004	0.92343	0.031	0.0206	0.004	1e-05	status=JK
YAL042W	ERV46		1.05881	0.028	1.06483	0.023	-0.01614	0.027	0.00023	status=JK
YAL043C-A	YAL043C-A		0.99782	0.038	0.99397	0.049	0.01467	0.038	2e-05
YAL045C	YAL045C		0.99795	0.022	0.96661	0.117	0.00795	0.022	0.00016	status=JK
YAL046C	AIM1		1.04184	0.007	1.04238	0.015	0.00277	0.007	1e-05	status=JK
YAL048C	GEM1		0.88374	0.037	0.89979	0.037	-0.02154	0.037	2e-05
YAL049C	AIM2		0.89894	0.063	0.94769	0.104	-0.07558	0.063	9e-05
YAL051W	OAF1		1.00458	0.07	0.88714	0.026	0.12053	0.07	9e-05
YAL053W	FLC2		1.05088	0.055	1.06991	0.011	-0.02525	0.055	4e-05
YAL054C	ACS1		1.04132	0.04	1.04726	0.075	0.00565	0.04	2e-05
YAL055W	PEX22		0.96485	0.119	0.92501	0.145	0.00883	0.119	0.00051
YAL056W	GPB2		0.94088	0.138	0.9634	0.015	-0.01468	0.138	0.00085
YAL058C-A	YAL058C-A		0.9446	0.076	0.98655	0.009	-0.04493	0.076	0.00014
YAL058W	CNE1		0.99849	0.028	0.98236	0.08	0.01043	0.028	1e-05
YAL059W	ECM1		0.99344	0.006	0.9986	0.085	0.00373	0.006	1e-05	status=JK
YAL060W	BDH1		1.08633	0.13	1.03103	0.05	0.05591	0.13	0.00046
YAL061W	BDH2		1.09104	0.041	1.05297	0.09	0.0374	0.041	1e-05
YAL062W	GDH3		1.10112	0.102	1.09271	0.185	0.01308	0.102	0.00022
YAL064C-A	TDA8		1.16912	0.119	1.17628	0.048	-0.02123	0.119	0.00029
YAL065C	YAL065C		1.10558	0.05	1.09393	0.058	0.0109	0.05	3e-05
YAL066W	YAL066W		0.98517	0.047	0.97061	0.068	0.00703	0.047	3e-05
YAL067C	SEO1		0.89559	0.183	0.98043	0.058	-0.07276	0.182	0.00225
YAL068C	PAU8		1.03441	0.208	1.10281	0.102	-0.0592	0.207	0.00216
YAR002C-A	ERP1		1.09289	0.055	1.08617	0.006	0.00531	0.055	3e-05
YAR002W	NUP60		0.93723	0.027	0.96813	0.073	-0.04719	0.027	1e-05
YAR003W	SWD1		0.91325	0.013	0.89999	0.037	0.01195	0.013	7e-05	status=JK
YAR014C	BUD14		0.76737	0.031	0.91526	0.013	-0.14424	0.031	2e-05
YAR015W	ADE1		0.96968	0.095	1.002	0.046	-0.02876	0.095	0.00026
YAR018C	KIN3		0.74741	0.106	0.80024	0.117	-0.075	0.105	0.00076
YAR020C	PAU7		0.95701	0.08	0.9557	0.101	0.02397	0.08	0.00016
YAR023C	YAR023C		1.06728	0.202	1.14194	0.102	-0.06992	0.201	0.00181
YAR027W	UIP3		1.07185	0.066	1.00804	0.115	0.06175	0.066	6e-05
YAR028W	YAR028W		0.96974	0.112	0.94948	0.091	0.00396	0.111	0.00041
YAR029W	YAR029W		1.00583	0.091	0.92124	0.012	0.08796	0.091	0.00021
YAR030C	YAR030C		0.94678	0.053	0.99377	0.086	-0.05504	0.053	5e-05
YAR031W	PRM9		0.97864	0.046	1.01119	0.025	-0.02469	0.046	3e-05
YAR035W	YAT1		1.07469	0.055	1.02569	0.034	0.03725	0.055	0.00088	status=JK
YAR037W	YAR037W		1.13481	0.086	1.13816	0.05	-0.0177	0.086	0.00012
YAR040C	YAR040C		1.06173	0.083	1.05909	0.08	-0.00492	0.083	0.00013
YAR042W	SWH1		1.11734	0.033	1.02989	0.03	0.08886	0.033	0.0003	status=JK
YAR043C	YAR043C		1.11218	0.059	0.99086	0.112	0.1039	0.059	0.00094	status=JK
YAR044W	YAR044W		1.04558	0.08	1.10051	0.027	-0.04375	0.08	0.00012
YAR047C	YAR047C		0.98606	0.121	0.89744	0.009	0.09233	0.12	0.0005
YAR050W	FLO1		0.95055	0.093	1.0769	0.044	-0.11503	0.093	0.00026
YBL001C	ECM15		1.16298	0.087	1.16935	0.049	-0.00902	0.087	0.00011
YBL003C	HTA2		1.08378	0.059	0.982	0.229	0.05074	0.059	4e-05
YBL005W	PDR3		1.01383	0.055	1.00835	0.157	-0.03438	0.055	4e-05
YBL007C	SLA1		0.70952	0.088	0.83682	0.108	-0.13501	0.088	0.00052
YBL008W	HIR1		0.92254	0.028	0.82326	0.195	0.09779	0.028	0.00032	status=JK
YBL009W	ALK2		0.98339	0.024	0.92083	0.082	0.07228	0.024	0
YBL010C	YBL010C		0.9448	0.237	1.0076	0.027	-0.06544	0.237	0.00413
YBL011W	SCT1		0.90524	0.021	0.70788	0.188	0.20441	0.021	0.00019	status=JK
YBL013W	FMT1		0.90145	0.024	0.84278	0.157	0.09678	0.024	0.00024	status=JK
YBL015W	ACH1		1.00429	0.076	1.04979	0.076	-0.03467	0.076	0.00012
YBL016W	FUS3		0.96809	0.022	1.01189	0.024	-0.03475	0.022	0
YBL017C	PEP1		1.06338	0.142	1.00427	0.032	0.04258	0.142	0.00065
YBL019W	APN2		1.08398	0.027	1.04007	0.086	0.0437	0.027	0.0002	status=JK
YBL021C	HAP3		0.94451	0.039	0.92033	0.041	0.01077	0.039	0.00056	status=JK
YBL024W	NCL1		1.1261	0.077	1.06717	0.084	0.04819	0.077	9e-05
YBL025W	RRN10		0.82113	0.035	0.80644	0.034	0.02267	0.035	2e-05
YBL027W	RPL19B		0.60418	0.066	0.43584	0.154	0.14505	0.066	0.00392	status=JK
YBL028C	YBL028C		1.10325	0.138	1.07304	0.04	0.03493	0.138	0.00053
YBL029W	YBL029W		1.15625	0.103	1.14014	0.076	-0.00321	0.103	0.0002
YBL031W	SHE1		0.10765	0.027	0.46818	0.33	-0.44154	0.027	0.021	status=JK
YBL032W	HEK2		1.04821	0.005	1.08507	0.031	-0.04089	0.005	1e-05	status=JK
YBL036C	YBL036C		0.96841	0.143	1.04982	0.049	-0.08685	0.143	0.00087
YBL037W	APL3		1.00195	0.05	1.00319	0.046	-0.00305	0.05	3e-05
YBL039C	URA7		0.93924	0.031	0.86275	0.049	0.07217	0.031	1e-05
YBL042C	FUI1		1.05696	0.053	1.08319	0.031	-0.02528	0.052	3e-05
YBL043W	ECM13		1.03104	0.035	1.01346	0.024	0.01196	0.034	1e-05
YBL046W	PSY4		1.22409	0.047	1.15292	0.024	0.06809	0.047	2e-05
YBL047C	EDE1		0.99206	0.065	0.95146	0.019	0.03227	0.064	8e-05
YBL048W	YBL048W		0.99046	0.106	1.09394	0.042	-0.1066	0.106	0.00034
YBL049W	MOH1		0.97188	0.075	0.98051	0.091	-0.03076	0.075	0.00013
YBL051C	PIN4		0.87233	0.009	0.90337	0.032	-0.024	0.009	4e-05	status=JK
YBL052C	SAS3		1.03889	0.03	1.07205	0.059	-0.02269	0.029	1e-05
YBL053W	YBL053W		1.05892	0.013	0.9556	0.088	0.10275	0.013	5e-05	status=JK
YBL054W	TOD6		1.10408	0.01	1.04649	0.071	0.06747	0.01	3e-05	status=JK
YBL055C	YBL055C		0.9186	0.098	0.95007	0.055	-0.02677	0.097	0.00033
YBL056W	PTC3		1.06497	0.051	0.9723	0.137	0.06494	0.051	3e-05
YBL057C	PTH2		1.0112	0.091	1.07785	0.016	-0.06602	0.091	0.0002
YBL059W	YBL059W		0.87403	0.1	0.87902	0.076	-0.0097	0.1	0.00041
YBL060W	YEL1		0.93487	0.096	0.94209	0.028	0.00285	0.096	0.0003
YBL061C	SKT5		1.14049	0.035	1.06371	0.037	0.08923	0.034	0.00031	status=JK
YBL062W	YBL062W		0.99938	0.043	1.07446	0.023	-0.07695	0.043	2e-05
YBL063W	KIP1		1.05098	0.068	1.07226	0.027	-0.02777	0.068	8e-05
YBL064C	PRX1		1.04077	0.009	0.9665	0.064	0.07381	0.009	3e-05	status=JK
YBL065W	YBL065W		1.03958	0.059	1.13775	0.048	-0.09535	0.059	0.00109	status=JK
YBL066C	SEF1		0.80586	0.136	0.83668	0.168	-0.03769	0.136	0.00129
YBL067C	UBP13		0.93939	0.138	0.96057	0.105	-0.02246	0.137	0.00085
YBL068W	PRS4		1.02054	0.042	1.04005	0.025	-0.0219	0.042	2e-05
YBL069W	AST1		1.07088	0.013	0.98487	0.062	0.06336	0.013	5e-05	status=JK
YBL070C	YBL070C		0.99119	0.12	0.85964	0.057	0.12321	0.12	0.00049
YBL071C	YBL071C		0.93323	0.11	1.05214	0.051	-0.14368	0.11	0.00045
YBL072C	RPS8A		0.45657	0.07	0.38863	0.091	0.04466	0.07	0.00097
YBL075C	SSA3		0.92225	0.06	0.98342	0.034	-0.06666	0.06	7e-05
YBL078C	ATG8		0.83731	0.026	0.86194	0.016	-0.02109	0.026	0.00033	status=JK
YBL079W	NUP170		0.64068	0.028	0.59458	0.02	0.04506	0.028	0.00065	status=JK
YBL081W	YBL081W		0.99264	0.06	0.96558	0.102	0.02371	0.06	6e-05
YBL082C	ALG3		1.09578	0.083	1.10265	0.01	-0.00209	0.083	0.00012
YBL083C	YBL083C		1.02034	0.073	1.00153	0.104	0.01288	0.073	0.0001
YBL085W	BOI1		1.15731	0.005	1.04356	0.006	0.11277	0.005	1e-05	status=JK
YBL086C	YBL086C		1.0868	0.016	1.12151	0.039	-0.0443	0.016	0
YBL087C	RPL23A		0.73301	0.185	0.8277	0.121	-0.12154	0.184	0.00417
YBL088C	TEL1		1.21331	0.068	1.18084	0.08	0.02408	0.068	5e-05
YBL089W	AVT5		0.94401	0.071	0.81967	0.081	0.11528	0.07	0.00011
YBL091C	MAP2		1.19347	0.038	1.08978	0.068	0.12047	0.038	1e-05
YBL091C-A	SCS22		1.06734	0.175	1.01687	0.03	0.04981	0.175	0.00119
YBL094C	YBL094C		0.8712	0.038	0.7821	0.225	0.05246	0.038	0.00062	status=JK
YBL095W	YBL095W		1.05953	0.074	1.04018	0.015	0.02185	0.074	9e-05
YBL096C	YBL096C		1.04294	0.038	1.04074	0.014	0.00336	0.038	0.00045	status=JK
YBL098W	BNA4		1.01282	0.051	0.94459	0.066	0.08486	0.051	4e-05
YBL100C	YBL100C		0.97523	0.065	1.00257	0.044	-0.02974	0.065	8e-05
YBL101C	ECM21		0.96858	0.044	0.95087	0.082	0.04158	0.044	3e-05
YBL102W	SFT2		1.03299	0.061	1.02567	0.05	0.018	0.061	6e-05
YBL103C	RTG3		0.56728	0.048	0.52711	0.072	0.04457	0.048	0.00017
YBL103C	RTG3		1.01224	0.024	1.05477	0.015	-0.04248	0.024	0
YBL104C	SEA4		0.93151	0.103	0.85968	0.016	0.06444	0.102	0.00036
YBL106C	SRO77		1.00846	0.079	1.00181	0.028	0.01049	0.079	0.00013
YBL107C	MIC23		0.94977	0.048	0.99314	0.046	-0.03819	0.048	4e-05
YBR001C	NTH2		0.93474	0.119	1.02854	0.041	-0.08933	0.119	0.00056
YBR005W	RCR1		1.05485	0.021	1.11703	0.047	-0.07054	0.021	0.00013	status=JK
YBR006W	UGA2		1.1346	0.071	1.15559	0.131	-0.01631	0.071	7e-05
YBR007C	DSF2		1.15937	0.022	1.15318	0.12	0.00372	0.022	0.00012	status=JK
YBR008C	FLR1		1.12103	0.083	1.07521	0.186	0.02186	0.083	0.00184	status=JK
YBR009C	HHF1		0.83445	0.047	0.91374	0.113	-0.0563	0.047	5e-05
YBR010W	HHT1		0.81538	0.014	0.91702	0.145	-0.12313	0.014	0
YBR012C	YBR012C		0.95779	0.046	0.90555	0.15	0.05298	0.046	0.00078	status=JK
YBR013C	YBR013C		1.00599	0.125	1.01349	0.182	-0.01603	0.124	0.00052
YBR014C	GRX7		0.95357	0.006	0.83492	0.225	0.08894	0.006	1e-05	status=JK
YBR015C	MNN2		1.07954	0.144	1.00514	0.121	0.04763	0.144	0.00065
YBR016W	YBR016W		1.15179	0.229	1.13183	0.034	0.03506	0.228	0.00209
YBR018C	GAL7		1.03169	0.124	0.92629	0.13	0.12212	0.124	0.00047
YBR019C	GAL10		0.88603	0.121	0.89084	0.224	0.01679	0.121	0.0007
YBR020W	GAL1		1.11391	0.036	1.11399	0.037	0.01071	0.035	0.00034	status=JK
YBR020W	GAL1		1.01128	0.103	0.9714	0.016	0.03989	0.102	0.00029
YBR022W	POA1		1.06542	0.113	0.99864	0.017	0.06248	0.112	0.00032
YBR023C	CHS3		1.1041	0.09	1.05476	0.021	0.05232	0.09	0.00015
YBR024W	SCO2		1.21265	0.063	1.06802	0.062	0.13997	0.063	4e-05
YBR025C	OLA1		0.93541	0.063	0.94503	0.043	-0.0091	0.063	9e-05
YBR026C	ETR1		0.81142	0.086	0.85242	0.029	-0.04361	0.086	0.00033
YBR027C	YBR027C		1.08652	0.024	1.15637	0.012	-0.06851	0.024	0
YBR028C	YPK3		1.06379	0.138	1.00364	0.117	0.04347	0.137	0.00059
YBR030W	RKM3		1.00998	0.055	1.02298	0.091	-0.02291	0.055	4e-05
YBR031W	RPL4A		0.94288	0.183	1.11315	0.03	-0.16048	0.183	0.00196
YBR032W	YBR032W		1.0416	0.111	1.00894	0.018	0.03546	0.111	0.00033
YBR033W	EDS1		0.98171	0.089	1.01887	0.017	-0.03885	0.088	0.0002
YBR034C	HMT1		0.92017	0.02	0.92957	0.023	-0.01191	0.02	0
YBR036C	CSG2		0.82596	0.027	0.73679	0.021	0.08777	0.027	1e-05
YBR040W	FIG1		1.22121	0.02	1.14482	0.036	0.07005	0.02	9e-05	status=JK
YBR041W	FAT1		0.98992	0.02	1.03722	0.045	-0.04318	0.02	0.00014	status=JK
YBR042C	CST26		1.05957	0.093	1.05149	0.015	0.00578	0.093	0.00018
YBR043C	QDR3		1.058	0.056	1.03882	0.008	0.01866	0.056	4e-05
YBR044C	TCM62		0.97214	0.061	1.00481	0.052	-0.04802	0.061	7e-05
YBR045C	GIP1		1.05887	0.021	0.97585	0.01	0.08768	0.021	0.00013	status=JK
YBR046C	ZTA1		0.93012	0.115	1.04564	0.031	-0.12398	0.115	0.00052
YBR047W	FMP23		1.06017	0.018	1.01647	0.156	0.00768	0.018	9e-05	status=JK
YBR048W	RPS11B		0.76082	0.037	0.78815	0.033	-0.03494	0.037	3e-05
YBR050C	REG2		1.05007	0.041	0.97318	0.118	0.05086	0.041	2e-05
YBR051W	YBR051W		1.13522	0.001	1.08503	0.037	0.04784	0.001	0	status=JK
YBR052C	RFS1		1.0343	0.083	1.01067	0.093	0.01651	0.083	0.00014
YBR053C	YBR053C		1.06542	0.07	1.1214	0.032	-0.05305	0.069	8e-05
YBR054W	YRO2		0.98542	0.056	0.92214	0.117	0.06315	0.056	5e-05
YBR056W	YBR056W		0.98778	0.029	0.996	0.086	-0.01831	0.029	0.00029	status=JK
YBR057C	MUM2		1.00943	0.059	0.97645	0.014	0.02897	0.059	5e-05
YBR058C	UBP14		0.97695	0.043	0.90422	0.004	0.06989	0.043	2e-05
YBR059C	AKL1		0.95876	0.052	0.91848	0.141	0.0457	0.051	4e-05
YBR061C	TRM7		1.0796	0.018	1.02155	0.055	0.05043	0.018	9e-05	status=JK
YBR061C	TRM7		0.36612	0.026	0.6062	0.029	-0.24086	0.026	0.00162	status=JK
YBR062C	YBR062C		0.99488	0.079	0.97135	0.048	0.01972	0.079	0.00014
YBR063C	YBR063C		1.03777	0.056	1.0088	0.071	0.02147	0.056	4e-05
YBR064W	YBR064W		1.11261	0.086	1.16486	0.046	-0.0396	0.086	0.00013
YBR065C	ECM2		1.09697	0.088	1.05879	0.064	0.05482	0.088	0.00014
YBR066C	NRG2		0.94128	0.008	1.05083	0.059	-0.09629	0.008	3e-05	status=JK
YBR067C	TIP1		1.13624	0.125	1.08281	0.158	0.08113	0.125	0.00036
YBR068C	BAP2		1.06656	0.104	1.13437	0.032	-0.06026	0.103	0.00025
YBR069C	TAT1		1.07104	0.045	1.02064	0.132	0.0357	0.045	0.00058	status=JK
YBR071W	YBR071W		1.02242	0.047	0.94614	0.039	0.08087	0.047	3e-05
YBR072W	HSP26		1.13917	0.192	1.09557	0.041	0.04178	0.192	0.0013
YBR073W	RDH54		0.92344	0.185	1.0096	0.022	-0.07616	0.185	0.00214
YBR074W	YBR074W		1.09543	0.07	1.01207	0.013	0.08514	0.07	7e-05
YBR075W	YBR075W		1.0513	0.047	1.0742	0.045	-0.01478	0.046	2e-05
YBR075W	YBR075W		1.05298	0.012	1.0477	0.067	-0.00411	0.012	0
YBR076W	ECM8		0.77511	0.188	0.77271	0.118	-0.01999	0.188	0.00376
YBR077C	SLM4		1.15774	0.094	1.22855	0.005	-0.07027	0.094	0.00015
YBR078W	ECM33		1.11193	0.049	1.12456	0.023	-0.01283	0.049	2e-05
YBR082C	UBC4		0.84937	0.181	0.93473	0.006	-0.08608	0.18	0.00255
YBR082C	UBC4		0.97899	0.023	1.0059	0.018	-0.02661	0.023	0.00018	status=JK
YBR083W	TEC1		1.32035	0.041	1.22588	0.039	0.07535	0.041	1e-05
YBR084C-A	RPL19A		0.62255	0.248	0.6575	0.202	-0.08536	0.247	0.01514
YBR084W	MIS1		1.01856	0.125	1.04532	0.05	-0.01638	0.125	0.00051
YBR085W	AAC3		0.99975	0.034	0.92871	0.063	0.08885	0.034	1e-05
YBR086C	IST2		0.99577	0.114	1.03836	0.063	-0.05535	0.114	0.00041
YBR090C	YBR090C		1.03387	0.033	0.94899	0.02	0.07363	0.033	0.00034	status=JK
YBR090C-A	YBR090C-A		1.12136	0.085	1.02381	0.023	0.09696	0.085	0.00012
YBR092C	PHO3		0.97413	0.031	0.93282	0.022	0.04463	0.031	1e-05
YBR093C	PHO5		0.49882	0.053	0.57878	0.062	-0.09611	0.052	0.00032
YBR094W	PBY1		0.98307	0.011	1.01708	0.021	-0.03075	0.011	0
YBR095C	RXT2		0.88104	0.066	0.84136	0.076	0.02684	0.066	0.00012
YBR095C	RXT2		0.88853	0.127	0.90817	0.029	-0.02975	0.126	0.00078
YBR098W	MMS4		1.03747	0.066	1.07146	0.099	-0.02424	0.066	7e-05
YBR099C	YBR099C		1.02433	0.033	0.93009	0.03	0.08132	0.033	0.00034	status=JK
YBR100W	YBR100W		1.08157	0.135	1.01118	0.127	0.0783	0.134	0.00052
YBR101C	FES1		1.0515	0.106	1.04287	0.043	0.00122	0.106	0.00028
YBR103W	SIF2		0.80423	0.074	0.77814	0.065	0.00987	0.074	0.00021
YBR104W	YMC2		0.87512	0.01	0.85044	0.103	0.00292	0.01	4e-05	status=JK
YBR105C	VID24		1.04254	0.066	1.05002	0.015	-0.01428	0.066	7e-05
YBR106W	PHO88		0.00028	0	0.04575	0.048	-0.0357	0	0.42265	status=JK
YBR107C	IML3		0.97906	0.104	0.96971	0.004	0.00926	0.104	0.00033
YBR108W	AIM3		1.16421	0.019	1.04777	0.041	0.13492	0.019	9e-05	status=JK
YBR111C	YSA1		1.06461	0.093	1.13447	0.071	-0.08653	0.093	0.00018
YBR113W	YBR113W		0.96599	0.104	0.97666	0.057	-0.02394	0.104	0.00034
YBR114W	RAD16		1.09135	0.122	1.13562	0.037	-0.03297	0.122	0.00038
YBR115C	LYS2		0.42916	0.028	0.3753	0.054	0.04894	0.028	8e-05
YBR115C	LYS2		0.6706	0.02	0.68867	0.055	-0.03954	0.02	1e-05
YBR116C	YBR116C		1.02773	0.133	0.93269	0.183	0.08775	0.132	0.00058
YBR118W	TEF2		0.98278	0.016	0.92952	0.026	0.04777	0.016	8e-05	status=JK
YBR119W	MUD1		0.9318	0.008	0.89801	0.098	0.04446	0.008	3e-05	status=JK
YBR121C	GRS1		0.98848	0.06	0.88477	0.088	0.09283	0.059	6e-05
YBR122C	MRPL36		0.95283	0.065	0.97786	0.15	-0.02212	0.065	9e-05
YBR125C	PTC4		0.89268	0.051	1.0126	0.018	-0.1153	0.051	5e-05
YBR126C	TPS1		0.69722	0.076	0.81617	0.013	-0.12339	0.075	0.00035
YBR128C	ATG14		0.98906	0.06	1.02411	0.017	-0.03757	0.06	6e-05
YBR129C	OPY1		0.99012	0.045	0.98172	0.05	3e-05	0.045	3e-05
YBR130C	SHE3		1.02562	0.008	1.0881	0.08	-0.08579	0.008	2e-05	status=JK
YBR131W	CCZ1		0.90134	0.088	0.79354	0.056	0.09578	0.087	0.00025
YBR132C	AGP2		1.10422	0.07	1.09658	0.046	0.01602	0.069	7e-05
YBR134W	YBR134W		1.05527	0.052	1.09896	0.018	-0.04484	0.052	3e-05
YBR137W	YBR137W		0.98269	0.071	0.90537	0.072	0.09116	0.071	0.0001
YBR138C	YBR138C		1.06372	0.114	1.11551	0.06	-0.03347	0.113	0.00033
YBR139W	YBR139W		1.02811	0.131	1.01754	0.081	-0.00487	0.13	0.00056
YBR141C	YBR141C		1.07475	0.04	1.06925	0.03	0.00061	0.04	0.00046	status=JK
YBR144C	YBR144C		1.03242	0.076	0.95335	0.102	0.06358	0.075	0.00011
YBR145W	ADH5		1.04285	0.013	0.85877	0.03	0.1669	0.013	5e-05	status=JK
YBR146W	MRPS9		0.95065	0.028	1.01947	0.015	-0.06759	0.028	1e-05
YBR147W	RTC2		0.73243	0.058	0.91241	0.03	-0.18761	0.058	0.00013
YBR148W	YSW1		1.0935	0.093	1.15906	0.042	-0.0629	0.093	0.00017
YBR149W	ARA1		1.05053	0.07	0.94629	0.056	0.0919	0.07	8e-05
YBR150C	TBS1		0.99558	0.005	0.94516	0.004	0.05075	0.005	1e-05	status=JK
YBR151W	APD1		0.97191	0.045	0.94329	0.007	0.02483	0.045	3e-05
YBR156C	SLI15		0.96045	0.046	0.96939	0.06	0.00738	0.046	3e-05
YBR157C	ICS2		0.98514	0.141	0.94527	0.178	-0.00166	0.141	0.00079
YBR158W	AMN1		0.97792	0.304	0.97075	0.089	0.0166	0.304	0.00764
YBR159W	IFA38		1.10367	0.088	1.22556	0.055	-0.10831	0.088	0.00014
YBR161W	CSH1		0.96889	0.085	0.97958	0.075	-0.00717	0.085	0.00019
YBR162C	TOS1		1.06047	0.059	1.07946	0.024	-0.03063	0.059	5e-05
YBR162W-A	YSY6		1.0528	0.022	1.02115	0.048	0.03247	0.022	0
YBR164C	ARL1		0.94928	0.083	0.88242	0.043	0.07113	0.083	0.00018
YBR165W	UBS1		1.01215	0.112	1.05808	0.066	-0.06736	0.112	0.00037
YBR165W	UBS1		0.98006	0.006	1.01075	0.021	-0.02987	0.006	1e-05	status=JK
YBR166C	TYR1		0.94819	0.069	0.95087	0.11	-0.01883	0.068	0.0001
YBR168W	PEX32		0.86829	0.08	0.95178	0.104	-0.09091	0.08	0.00021
YBR169C	SSE2		1.07749	0.12	0.95306	0.046	0.11852	0.12	0.00038
YBR170C	NPL4		0.72571	0.191	0.66261	0.026	0.06991	0.191	0.00475
YBR171W	SEC66		1.00498	0.138	0.96964	0.064	0.02387	0.138	0.00071
YBR172C	SMY2		0.93602	0.062	0.94952	0.03	-0.0226	0.062	8e-05
YBR174C	YBR174C		0.91867	0.003	1.01346	0.048	-0.0901	0.003	0	status=JK
YBR175W	SWD3		0.86457	0.063	0.93559	0.031	-0.07351	0.063	0.00011
YBR176W	ECM31		1.00922	0.046	0.98554	0.009	0.01789	0.046	0.00069	status=JK
YBR177C	EHT1		1.0836	0.033	0.96633	0.137	0.08887	0.033	0.00032	status=JK
YBR178W	YBR178W		1.08531	0.036	1.11907	0.016	-0.04228	0.036	1e-05
YBR180W	DTR1		0.9183	0.107	0.9128	0.065	0.00751	0.107	0.00043
YBR181C	RPS6B		0.70367	0.071	0.67935	0.112	-0.00275	0.071	0.00029
YBR182C	SMP1		1.0554	0.083	1.0394	0.057	0.02326	0.083	0.00013
YBR183W	YPC1		0.9785	0.263	0.98359	0.042	0.00046	0.263	0.00504
YBR184W	YBR184W		0.85229	0.085	0.99138	0.066	-0.13076	0.084	0.00027
YBR185C	MBA1		0.94631	0.042	0.89995	0.059	0.03312	0.042	2e-05
YBR186W	PCH2		1.00462	0.072	0.98207	0.007	0.01867	0.071	0.0001
YBR187W	GDT1		0.98446	0.049	0.99373	0.054	-0.00396	0.049	3e-05
YBR188C	NTC20		1.08808	0.017	1.12682	0.069	-0.02673	0.017	8e-05	status=JK
YBR189W	RPS9B		0.37913	0.029	0.36258	0.031	0.01324	0.029	0.00012
YBR194W	AIM4		0.72307	0.043	0.80046	0.05	-0.08997	0.042	0.00115	status=JK
YBR195C	MSI1		1.0383	0.022	0.91697	0.029	0.10694	0.022	0.00015	status=JK
YBR197C	YBR197C		1.11121	0.102	1.21721	0.077	-0.09624	0.102	0.00021
YBR199W	KTR4		1.03638	0.07	0.9777	0.017	0.05862	0.07	8e-05
YBR200W	BEM1		0.38013	0.175	0.49899	0.069	-0.13402	0.175	0.02252
YBR201W	DER1		0.99378	0.05	0.95822	0.041	0.03699	0.05	4e-05
YBR203W	COS111		1.12194	0.001	1.16929	0.028	-0.04369	0.001	0	status=JK
YBR204C	LDH1		0.96172	0.087	1.01863	0.112	-0.07274	0.087	0.0002
YBR205W	KTR3		1.00018	0.027	1.01277	0.033	-0.00896	0.027	1e-05
YBR206W	YBR206W		1.10873	0.02	0.99282	0.081	0.1096	0.02	0.00011	status=JK
YBR207W	FTH1		1.07809	0.122	0.98645	0.042	0.07896	0.121	0.00039
YBR208C	DUR1		0.98244	0.104	1.11376	0.022	-0.12809	0.104	0.00032
YBR209W	YBR209W		0.99467	0.029	1.11376	0.094	-0.09103	0.029	0.00028	status=JK
YBR210W	ERV15		1.02773	0.015	1.06255	0.046	-0.03596	0.015	7e-05	status=JK
YBR212W	NGR1		0.92136	0.03	0.98718	0.102	-0.05813	0.029	0.00034	status=JK
YBR213W	MET8		0.97477	0.014	0.99355	0.083	-0.02543	0.014	0
YBR214W	SDS24		0.97599	0.037	0.9981	0.009	-0.01845	0.037	0.00047	status=JK
YBR215W	HPC2		1.12757	0.078	1.16621	0.046	-0.04785	0.078	9e-05
YBR216C	YBP1		0.96896	0.09	1.04103	0.018	-0.06735	0.09	0.00022
YBR217W	ATG12		0.8809	0.143	0.96565	0.055	-0.08656	0.142	0.00115
YBR218C	PYC2		1.12864	0.021	1.05699	0.092	0.05073	0.021	0.00012	status=JK
YBR219C	YBR219C		0.8838	0.211	0.9483	0.103	-0.09736	0.211	0.00359
YBR220C	YBR220C		0.91527	0.112	1.03683	0.02	-0.11222	0.112	0.0005
YBR221C	PDB1		0.88805	0.079	0.86346	0.02	0.03322	0.079	0.00019
YBR222C	PCS60		1.03274	0.131	1.01565	0.111	-0.00318	0.131	0.00056
YBR223C	TDP1		0.99348	0.051	0.98306	0.033	0.00249	0.051	4e-05
YBR224W	YBR224W		0.87649	0.028	0.89645	0.155	-0.02609	0.028	1e-05
YBR225W	YBR225W		0.93421	0.048	0.90559	0.006	0.02858	0.048	0.00089	status=JK
YBR226C	YBR226C		0.98833	0.155	1.01349	0.029	-0.02742	0.155	0.00104
YBR227C	MCX1		1.01177	0.096	1.01105	0.036	-0.0023	0.096	0.00023
YBR228W	SLX1		0.99682	0.096	1.03769	0.054	-0.02587	0.096	0.00025
YBR229C	ROT2		1.10497	0.073	1.06943	0.022	0.03594	0.073	8e-05
YBR230C	OM14		0.98137	0.043	1.01927	0.005	-0.041	0.043	2e-05
YBR231C	SWC5		0.33331	0.084	0.3089	0.035	0.02669	0.083	0.00411
YBR232C	YBR232C		1.04502	0.079	1.05941	0.04	-0.02058	0.079	0.00012
YBR233W	PBP2		0.96085	0.013	0.95019	0.015	0.00778	0.013	6e-05	status=JK
YBR235W	VHC1		1.02413	0.099	0.93022	0.075	0.07271	0.099	0.00025
YBR238C	YBR238C		0.68801	0.163	0.63191	0.168	0.0491	0.163	0.00348
YBR239C	ERT1		1.10291	0.084	1.11963	0.047	-0.01266	0.084	0.00012
YBR240C	THI2		1.04062	0.12	1.09924	0.033	-0.06937	0.119	0.00041
YBR241C	YBR241C		1.01635	0.037	0.98649	0.019	0.01643	0.037	0.00045	status=JK
YBR242W	YBR242W		1.01112	0.074	0.98958	0.092	0.03083	0.074	0.00011
YBR244W	GPX2		0.98454	0.063	1.00971	0.021	-0.0213	0.063	7e-05
YBR245C	ISW1		1.00887	0.029	0.95818	0.008	0.05221	0.029	1e-05
YBR246W	RRT2		1.12052	0.021	1.07248	0.034	0.03908	0.021	0.00012	status=JK
YBR248C	HIS7		0.58409	0.147	0.50252	0.1	0.08297	0.147	0.00419
YBR249C	ARO4		0.98785	0.058	0.91994	0.058	0.05555	0.058	6e-05
YBR250W	SPO23		0.95021	0.103	1.01503	0.045	-0.06703	0.103	0.00035
YBR255W	MTC4		1.0338	0.077	1.00097	0.154	0.0552	0.076	0.00011
YBR258C	SHG1		1.13927	0.058	1.10397	0.074	0.01597	0.058	0.00086	status=JK
YBR259W	YBR259W		0.97911	0.066	0.98019	0.052	-0.00614	0.066	8e-05
YBR260C	RGD1		1.04807	0.012	1.12817	0.014	-0.08686	0.012	5e-05	status=JK
YBR261C	TAE1		0.95581	0.097	1.03896	0.041	-0.08408	0.097	0.00343	status=JK
YBR262C	AIM5		0.86243	0.075	0.92948	0.02	-0.07066	0.075	0.00018
YBR263W	SHM1		0.99608	0.216	0.95483	0.077	0.02021	0.215	0.00269
YBR264C	YPT10		1.05356	0.118	0.94057	0.089	0.11653	0.118	0.00039
YBR266C	YBR266C		0.61129	0.074	0.54649	0.144	0.02902	0.074	0.00049
YBR267W	REI1		0.52814	0.07	0.38676	0.043	0.15072	0.07	0.00064
YBR269C	FMP21		1.04078	0.106	1.0169	0.086	0.00857	0.106	0.00029
YBR270C	BIT2		1.09843	0.12	0.96965	0.264	0.08505	0.12	0.00397	status=JK
YBR271W	EFM2		0.96489	0.134	0.89888	0.129	0.0957	0.134	0.00073
YBR272C	HSM3		0.91844	0.079	0.95693	0.12	-0.06953	0.079	0.00017
YBR273C	UBX7		0.97142	0.079	1.02127	0.059	-0.04719	0.079	0.00015
YBR274W	CHK1		0.98952	0.106	1.01663	0.067	-0.00892	0.106	0.00033
YBR275C	RIF1		0.84736	0.244	0.79208	0.038	0.0535	0.244	0.00613
YBR276C	PPS1		0.99621	0.041	0.97323	0.161	0.04649	0.041	2e-05
YBR277C	YBR277C		0.95466	0.056	1.06496	0.003	-0.11427	0.056	6e-05
YBR278W	DPB3		1.03349	0.189	1.02166	0.037	0.00389	0.188	0.00163
YBR280C	SAF1		1.05475	0.104	0.98009	0.095	0.06404	0.103	0.00026
YBR281C	DUG2		1.0348	0.09	1.04865	0.088	-0.02317	0.09	0.00018
YBR283C	SSH1		0.81666	0.189	0.70265	0.167	0.11065	0.189	0.00328
YBR284W	YBR284W		0.86063	0.114	0.95106	0.149	-0.11409	0.114	0.00063
YBR285W	YBR285W		1.10385	0.059	1.06712	0.017	0.03086	0.059	4e-05
YBR286W	APE3		1.01532	0.067	0.99563	0.038	0.0117	0.067	8e-05
YBR287W	YBR287W		0.8247	0.251	0.84062	0.139	-0.04474	0.251	0.0072
YBR288C	APM3		0.72811	0.042	0.96918	0.037	-0.23786	0.042	0.00112	status=JK
YBR289W	SNF5		0.4721	0.084	0.4678	0.046	0.00949	0.084	0.0015
YBR290W	BSD2		1.00444	0.107	0.99165	0.09	0.01103	0.107	0.00033
YBR291C	CTP1		0.86415	0.093	0.80923	0.045	0.0377	0.093	0.00034
YBR292C	YBR292C		0.98046	0.09	1.0019	0.031	-0.02293	0.09	0.00021
YBR293W	VBA2		0.99784	0.05	0.89594	0.067	0.11369	0.05	3e-05
YBR294W	SUL1		0	0	0	0	0	0	#NUM!
YBR295W	PCA1		0.96131	0.014	0.94946	0.011	0.01503	0.014	7e-05	status=JK
YBR296C	PHO89		1.04186	0.049	1.04321	0.011	-0.00355	0.049	3e-05
YBR297W	MAL33		1.01778	0.136	0.97957	0.057	0.01972	0.136	0.00065
YBR298C	MAL31		0.97625	0.035	0.94774	0.04	0.02788	0.035	0.00042	status=JK
YBR299W	MAL32		1.10829	0.039	1.10383	0.066	0.02274	0.039	1e-05
YBR300C	YBR300C		1.02433	0.14	1.08078	0.011	-0.06218	0.14	0.0007
YBR301W	PAU24		1.08315	0.065	0.98799	0.093	0.08138	0.065	6e-05
YCL001W	RER1		1.06379	0.118	1.06599	0.114	-0.01533	0.118	0.00037
YCL001W-A	YCL001W-A		1.07019	0.149	1.09243	0.14	-0.00656	0.149	0.00073
YCL002C	YCL002C		0.82244	0.134	0.93432	0.143	-0.11173	0.134	0.00117
YCL006C	YCL006C		0.9605	0.192	0.97396	0.138	-0.04666	0.191	0.00212
YCL009C	ILV6		1.12971	0.112	1.06854	0.142	0.03385	0.112	0.00026
YCL010C	SGF29		0.85923	0.215	0.86723	0.04	-0.00989	0.214	0.00408
YCL011C	GBP2		1.11412	0.089	1.01784	0.093	0.11351	0.088	0.0021	status=JK
YCL012W	YCL012W		0.92963	0.23	1.05081	0.06	-0.1109	0.23	0.00396
YCL013W	YCL013W		0.83838	0.188	0.6661	0.025	0.16761	0.188	0.00299
YCL014W	BUD3		0.99957	0.111	0.93796	0.172	0.05628	0.111	0.00038
YCL016C	DCC1		0.85353	0.022	1.00056	0.009	-0.14597	0.022	0.00021	status=JK
YCL022C	YCL022C		1.02732	0.026	0.98188	0.051	0.07014	0.026	0.00022	status=JK
YCL023C	YCL023C		1.05692	0.138	0.92212	0.181	0.10933	0.138	0.00061
YCL024W	KCC4		1.03824	0.196	0.94404	0.156	0.11698	0.196	0.0018
YCL025C	AGP1		0.76062	0.078	0.84758	0.031	-0.0921	0.078	0.0003
YCL026C	YCL026C		1.15469	0.022	1.21788	0.049	-0.09269	0.022	0.00013	status=JK
YCL026C-A	FRM2		1.0134	0.025	1.01147	0.052	-0.01379	0.025	0.0002	status=JK
YCL027W	FUS1		1.07707	0.083	1.10103	0.034	-0.0431	0.083	0.00013
YCL028W	RNQ1		0.95667	0.114	1.06232	0.071	-0.11787	0.113	0.00045
YCL029C	BIK1		1.04287	0.046	0.97479	0.061	0.05381	0.046	2e-05
YCL030C	HIS4		0.59691	0.096	0.65958	0.032	-0.06808	0.096	0.00113
YCL032W	STE50		0.79148	0.005	0.8298	0.024	-0.03519	0.005	1e-05	status=JK
YCL033C	MXR2		1.0597	0.042	1.02036	0.018	0.02627	0.041	0.00051	status=JK
YCL034W	LSB5		1.11577	0.171	1.05498	0.043	0.06539	0.17	0.00096
YCL035C	GRX1		1.04091	0.136	1.06157	0.069	-0.03835	0.136	0.00061
YCL036W	GFD2		1.15943	0.047	1.08714	0.029	0.06699	0.047	2e-05
YCL037C	SRO9		0.64511	0.106	0.78093	0.21	-0.11885	0.105	0.00118
YCL038C	ATG22		1.0167	0.048	1.00132	0.111	0.01097	0.048	3e-05
YCL039W	GID7		1.05213	0.013	1.11121	0.031	-0.06093	0.013	5e-05	status=JK
YCL040W	GLK1		1.10013	0.054	1.12666	0.006	-0.02825	0.054	3e-05
YCL042W	YCL042W		1.09016	0.031	1.07818	0.025	0.00705	0.031	1e-05
YCL044C	MGR1		0.97485	0.029	0.83752	0.073	0.1518	0.029	0.00029	status=JK
YCL045C	EMC1		1.07277	0.087	1.08782	0.023	-0.01279	0.086	0.00014
YCL046W	YCL046W		0.97605	0.172	1.02992	0.092	-0.08107	0.172	0.00147
YCL047C	POF1		1.07354	0.088	0.98928	0.093	0.08964	0.088	0.00015
YCL048W	SPS22		0.99135	0.06	0.98869	0.023	-0.00191	0.06	6e-05
YCL049C	YCL049C		0.98298	0.047	0.92459	0.055	0.0406	0.046	3e-05
YCL050C	APA1		1.04662	0.111	1.05843	0.023	-0.02817	0.11	0.00032
YCL051W	LRE1		1.10715	0.107	1.10311	0.133	0.02228	0.107	0.00025
YCL055W	KAR4		0.93579	0.056	0.92879	0.031	-0.00043	0.056	6e-05
YCL056C	PEX34		1.15518	0.021	1.06765	0.083	0.1054	0.021	0
YCL057W	PRD1		0.96522	0.015	1.02808	0.06	-0.07679	0.015	8e-05	status=JK
YCL060C	YCL060C		1.1304	0.089	0.98399	0.056	0.12092	0.089	0.00013
YCL061C	MRC1		0.92318	0.127	0.9982	0.096	-0.06678	0.127	0.00071
YCL062W	YCL062W		0.8667	0.115	0.82639	0.099	0.01847	0.114	0.00063
YCL063W	VAC17		1.04881	0.056	1.04639	0.035	-0.00321	0.055	4e-05
YCL064C	CHA1		1.1043	0.01	1.09657	0.012	0.0082	0.01	3e-05	status=JK
YCL069W	VBA3		0.91207	0.084	0.85827	0.198	0.05345	0.084	0.00021
YCL074W	YCL074W		0.77975	0.029	0.78414	0.086	-0.02175	0.029	1e-05
YCL075W	YCL075W		0.96406	0.154	1.02628	0.047	-0.08512	0.153	0.00109
YCL076W	YCL076W		0.92575	0.107	0.90834	0.082	0.01917	0.107	0.00042
YCR001W	YCR001W		1.18234	0.005	1.12072	0.024	0.06124	0.005	1e-05	status=JK
YCR005C	CIT2		1.01457	0.053	0.97216	0.03	0.04728	0.053	4e-05
YCR006C	YCR006C		1.1487	0.169	1.0628	0.029	0.07952	0.169	0.00086
YCR007C	YCR007C		1.27763	0.031	1.13771	0.072	0.14565	0.031	0.00019	status=JK
YCR008W	SAT4		1.023	0.195	1.05134	0.05	-0.02109	0.194	0.00184
YCR009C	RVS161		0.92111	0.033	0.75058	0.043	0.18133	0.033	0.00043	status=JK
YCR010C	ADY2		1.12026	0.009	1.07352	0.035	0.0396	0.009	2e-05	status=JK
YCR011C	ADP1		1.02414	0.038	1.18501	0.025	-0.15875	0.038	0.00047	status=JK
YCR014C	POL4		1.05785	0.082	1.14598	0.076	-0.10138	0.082	0.00013
YCR015C	YCR015C		1.10931	0.041	1.03734	0.033	0.05105	0.041	0.00045	status=JK
YCR016W	YCR016W		1.09399	0.034	0.96499	0.008	0.12471	0.034	0.00033	status=JK
YCR017C	CWH43		1.10723	0.122	1.08921	0.045	0.01657	0.121	0.00036
YCR019W	MAK32		1.05822	0.104	1.05015	0.051	0.01604	0.104	0.00026
YCR020C	PET18		0.95151	0.167	0.98556	0.008	-0.03621	0.167	0.00146
YCR020C-A	MAK31		1.00251	0.062	1.04621	0.084	-0.04026	0.062	7e-05
YCR021C	HSP30		1.12728	0.152	1.16345	0.058	-0.03827	0.152	0.00066
YCR022C	YCR022C		1.2128	0.077	1.06641	0.123	0.12846	0.077	7e-05
YCR023C	YCR023C		1.11788	0.199	1.08858	0.12	0.03186	0.199	0.00152
YCR024C-A	PMP1		1.00582	0.191	1.01636	0.092	-0.02309	0.19	0.00182
YCR025C	YCR025C		1.14124	0.04	1.11106	0.065	0.02288	0.04	1e-05
YCR026C	NPP1		1.16268	0.04	1.15181	0.029	0.00604	0.04	0.0004	status=JK
YCR027C	RHB1		1.08585	0.053	1.06369	0.093	0.0189	0.053	3e-05
YCR028C-A	RIM1		0.71724	0.04	0.68581	0.045	0.02913	0.04	5e-05
YCR030C	SYP1		1.09089	0.059	1.03334	0.055	0.04035	0.059	4e-05
YCR031C	RPS14A		0.79193	0.044	0.71607	0.046	0.04835	0.044	5e-05
YCR032W	BPH1		1.10226	0.055	0.9103	0.159	0.15237	0.055	0.00083	status=JK
YCR033W	SNT1		0.47436	0.084	0.48648	0.126	-0.0368	0.084	0.0015
YCR034W	FEN1		0.91286	0.089	0.88214	0.021	0.03777	0.089	0.00026
YCR036W	RBK1		1.09275	0.121	1.04092	0.11	0.04632	0.121	0.00037
YCR037C	PHO87		1.03106	0.047	1.03826	0.059	-0.01085	0.047	3e-05
YCR043C	YCR043C		1.10456	0.043	1.16778	0.046	-0.07	0.043	0.0005	status=JK
YCR044C	PER1		1.03687	0.057	1.04628	0.08	-0.00695	0.057	5e-05
YCR045C	RRT12		1.15546	0.085	1.15086	0.047	0.00213	0.085	0.00182	status=JK
YCR048W	ARE1		1.18724	0.048	1.07106	0.042	0.08971	0.048	0.00056	status=JK
YCR049C	YCR049C		1.0273	0.054	0.93369	0.173	0.05859	0.054	4e-05
YCR050C	YCR050C		0.92791	0.146	1.08894	0.038	-0.17225	0.146	0.00106
YCR051W	YCR051W		1.08489	0.126	1.15478	0.074	-0.0624	0.126	0.00043
YCR053W	THR4		0.38581	0.092	0.35711	0.112	0.02138	0.091	0.00351
YCR059C	YIH1		0.99838	0.158	1.0217	0.133	-0.02913	0.158	0.00107
YCR060W	TAH1		0.9103	0.086	1.0738	0.058	-0.15791	0.086	0.00023
YCR061W	YCR061W		1.00827	0.143	1.033	0.028	-0.04269	0.143	0.00077
YCR062W	YCR062W		1.07065	0.127	1.03784	0.161	0.03561	0.127	0.00046
YCR063W	BUD31		0.43025	0.081	0.47892	0.099	-0.04023	0.08	0.00176
YCR065W	HCM1		1.01107	0.108	1.09148	0.028	-0.09698	0.108	0.00033
YCR067C	SED4		1.19267	0.032	1.09972	0.053	0.09649	0.032	0.00024	status=JK
YCR068W	ATG15		1.13972	0.066	1.15617	0.067	-0.01839	0.066	5e-05
YCR069W	CPR4		1.23563	0.19	1.19312	0.024	0.02866	0.19	0.00098
YCR071C	IMG2		0.74633	0.081	0.76976	0.032	-0.033	0.081	0.00035
YCR073C	SSK22		1.12731	0.013	1.04616	0.09	0.0573	0.013	4e-05	status=JK
YCR073W-A	SOL2		0.95341	0.041	1.0105	0.078	-0.07232	0.041	2e-05
YCR075C	ERS1		1.14723	0.043	1.10203	0.023	0.04217	0.043	1e-05
YCR076C	FUB1		1.15201	0.102	1.21388	0.053	-0.07513	0.102	0.00019
YCR077C	PAT1		0.66113	0.097	0.77904	0.101	-0.13171	0.097	0.00086
YCR079W	PTC6		1.033	0.089	0.9935	0.105	0.05628	0.088	0.00017
YCR081W	SRB8		0.5367	0.044	0.65073	0.014	-0.11355	0.044	0.00015
YCR082W	AHC2		0.9672	0.081	1.00766	0.02	-0.04865	0.081	0.00016
YCR083W	TRX3		1.10509	0.08	1.08951	0.018	0.00993	0.08	0.0001
YCR085W	YCR085W		1.21413	0.039	1.11385	0.009	0.09873	0.039	1e-05
YCR086W	CSM1		0.92308	0.075	1.06307	0.02	-0.14677	0.075	0.00015
YCR087C-A	YCR087C-A		1.00933	0.111	1.06982	0.007	-0.06648	0.111	0.00036
YCR087W	YCR087W		1.14344	0.09	1.04659	0.073	0.08586	0.09	0.00013
YCR088W	ABP1		0.98685	0.05	0.97856	0.033	0.00362	0.05	4e-05
YCR089W	FIG2		1.15667	0.066	1.09455	0.023	0.05465	0.066	5e-05
YCR090C	YCR090C		1.12951	0.073	0.97745	0.159	0.14791	0.073	0.0014	status=JK
YCR091W	KIN82		0.87855	0.13	1.00398	0.052	-0.13186	0.129	0.00087
YCR092C	MSH3		0.99738	0.092	1.0201	0.017	-0.03193	0.092	0.00022
YCR095C	OCA4		1.04624	0.065	1.05992	0.118	-0.00662	0.065	7e-05
YCR098C	GIT1		1.1097	0.002	1.08338	0.015	0.01576	0.002	0	status=JK
YCR099C	YCR099C		1.0175	0.167	1.04591	0.058	-0.0427	0.167	0.00119
YCR100C	YCR100C		1.06045	0.105	1.18922	0.049	-0.11573	0.105	0.00026
YCR101C	YCR101C		0.99682	0.139	0.98505	0.124	-0.02411	0.139	0.00074
YCR102C	YCR102C		1.15212	0.051	1.02973	0.086	0.13126	0.051	2e-05
YCR102W-A	YCR102W-A		1.0417	0.06	1.0619	0.045	-0.0303	0.06	5e-05
YCR105W	ADH7		0.59508	0.443	0.77466	0.127	-0.19874	0.442	0.07461
YCR106W	RDS1		1.12106	0.048	1.1144	0.058	0.01544	0.048	2e-05
YCR107W	AAD3		1.05145	0.037	1.05528	0.008	-0.00504	0.037	1e-05
YDL001W	RMD1		1.04403	0.002	0.99912	0.06	0.02765	0.001	0	status=JK
YDL002C	NHP10		0.86268	0.08	0.86864	0.059	0.0042	0.08	0.00022
YDL006W	PTC1		0.82091	0.08	0.81856	0.056	0.00456	0.08	0.00026
YDL010W	GRX6		1.03808	0.084	1.12113	0.002	-0.08671	0.083	0.00014
YDL011C	YDL011C		1.10824	0.067	1.12268	0.053	-0.03021	0.067	0.0012	status=JK
YDL012C	YDL012C		0.93747	0.025	1.05758	0.087	-0.12656	0.025	0.00024	status=JK
YDL013W	SLX5		0.74066	0.174	0.59475	0.116	0.16854	0.174	0.00343
YDL018C	ERP3		0.98155	0.051	1.11262	0.039	-0.15567	0.051	4e-05
YDL019C	OSH2		1.07483	0.102	1.05752	0.173	-0.02172	0.102	0.00024
YDL020C	RPN4		0.75772	0.227	0.81623	0.053	-0.05468	0.227	0.00685
YDL023C	YDL023C		1.11558	0.023	1.13111	0.062	-0.03245	0.023	0.00015	status=JK
YDL024C	DIA3		1.01723	0.182	1.02129	0.085	-0.01075	0.181	0.00152
YDL025C	RTK1		1.09935	0.127	1.14506	0.037	-0.04561	0.127	0.00042
YDL026W	YDL026W		1.04597	0.048	0.98415	0.08	0.05875	0.048	3e-05
YDL027C	YDL027C		0.9232	0.212	0.87914	0.163	0.01707	0.212	0.00321
YDL033C	SLM3		0.75291	0.108	0.65823	0.129	0.09277	0.108	0.00081
YDL034W	YDL034W		0.9926	0.036	0.9682	0.039	0.03034	0.036	0.00044	status=JK
YDL035C	GPR1		1.06762	0.017	0.97616	0.044	0.08092	0.017	0
YDL036C	PUS9		1.09071	0.109	1.20344	0.03	-0.11722	0.109	0.00027
YDL037C	BSC1		1.07007	0.142	1.11925	0.069	-0.03363	0.142	0.00064
YDL038C	YDL038C		1.04411	0.012	0.99834	0.033	0.05959	0.012	4e-05	status=JK
YDL039C	PRM7		1.12295	0.084	1.08278	0.049	0.03426	0.083	0.00011
YDL040C	NAT1		1.06435	0.156	1.03976	0.086	0.04415	0.155	0.00085
YDL041W	YDL041W		0	0	0	0	0	0	#NUM!
YDL042C	SIR2		0	0	0	0	0	0	#NUM!
YDL046W	NPC2		0.93542	0.012	0.96434	0.043	-0.0462	0.012	0
YDL048C	STP4		1.11974	0.01	1.03041	0.088	0.06944	0.01	3e-05	status=JK
YDL050C	YDL050C		1.01954	0.023	1.04639	0.098	-0.05442	0.023	0
YDL051W	LHP1		1.03685	0.059	1.00533	0.017	0.02854	0.059	5e-05
YDL052C	SLC1		0.95252	0.108	0.98825	0.09	-0.03253	0.107	0.00039
YDL053C	PBP4		0.94278	0.133	0.99821	0.002	-0.05887	0.132	0.00076
YDL054C	MCH1		0.95878	0.068	1.00319	0.016	-0.05025	0.068	0.0001
YDL056W	MBP1		1.01302	0.027	1.22827	0.075	-0.19693	0.027	0.00023	status=JK
YDL059C	RAD59		1.14413	0.089	1.11755	0.078	0.02647	0.089	0.00013
YDL061C	RPS29B		0.83059	0.112	0.70308	0.05	0.1349	0.112	0.00067
YDL062W	YDL062W		0.83913	0.155	0.90041	0.086	-0.0721	0.155	0.00168
YDL065C	PEX19		0.97976	0.042	0.97592	0.019	-0.00034	0.042	0.00063	status=JK
YDL066W	IDP1		1.06048	0.203	1.0091	0.228	0.00844	0.203	0.00188
YDL070W	BDF2		0.93491	0.225	1.05779	0.052	-0.14952	0.224	0.00364
YDL071C	YDL071C		0.96102	0.125	0.97331	0.125	-0.00249	0.125	0.0006
YDL074C	BRE1		0.66841	0.182	0.72459	0.124	-0.03962	0.181	0.00519
YDL074C	BRE1		0.70335	0.012	0.72952	0.009	-0.02746	0.012	0.0001	status=JK
YDL076C	RXT3		1.07653	0.122	0.89933	0.108	0.17059	0.121	0.00039
YDL077C	VAM6		0.69048	0.024	0.71111	0.093	-0.02584	0.024	1e-05
YDL078C	MDH3		0.57866	0.255	0.56645	0.026	0.01517	0.254	0.01999
YDL079C	MRK1		1.02499	0.072	0.98933	0.135	0.0058	0.072	0.0001
YDL080C	THI3		0.88737	0.078	0.87578	0.033	0.00504	0.078	0.00018
YDL081C	RPP1A		0.65877	0.012	0.74814	0.028	-0.0768	0.012	0.00011	status=JK
YDL082W	RPL13A		0.69	0.079	0.82003	0.06	-0.12783	0.078	0.0004
YDL083C	RPS16B		0.74379	0.045	0.7132	0.05	0.01725	0.045	6e-05
YDL085W	NDE2		1.19822	0.031	1.09859	0.078	0.08795	0.031	0
YDL086W	YDL086W		1.14475	0.134	1.1443	0.063	-0.01564	0.134	0.00044
YDL088C	ASM4		1.04098	0.114	1.02159	0.037	0.02157	0.113	0.00035
YDL089W	NUR1		1.01467	0.101	1.0432	0.006	-0.02851	0.1	0.00027
YDL090C	RAM1		0	0	0	0	0	0	#NUM!
YDL091C	UBX3		0.9965	0.172	1.08826	0.009	-0.09946	0.171	0.00138
YDL093W	PMT5		1.17831	0.16	1.21096	0.029	-0.04695	0.16	0.00068
YDL094C	YDL094C		0.99472	0.109	1.04931	0.061	-0.05972	0.109	0.00036
YDL095W	PMT1		1.01364	0.008	0.97987	0.022	0.03581	0.008	2e-05	status=JK
YDL096C	YDL096C		0.95058	0.01	0.97379	0.022	-0.0237	0.01	0
YDL099W	BUG1		1.09249	0.051	1.12618	0.003	-0.03612	0.051	3e-05
YDL100C	GET3		1.02154	0.078	0.91787	0.054	0.08731	0.077	0.00012
YDL104C	QRI7		0.94117	0.049	0.8302	0.14	0.06623	0.049	4e-05
YDL106C	PHO2		0.79023	0.062	0.9439	0.052	-0.1606	0.062	0.00013
YDL109C	YDL109C		0.92245	0.036	0.90919	0.068	0.00948	0.036	2e-05
YDL110C	TMA17		0.82419	0.169	0.90766	0.064	-0.09994	0.169	0.00229
YDL112W	TRM3		1.02985	0.105	0.90854	0.044	0.09711	0.105	0.00347	status=JK
YDL113C	ATG20		0.83241	0.2	0.98144	0.029	-0.16771	0.2	0.00366
YDL114W	YDL114W		1.10384	0.041	1.03975	0.083	0.06782	0.041	0.00046	status=JK
YDL117W	CYK3		0.79242	0.051	0.81028	0.026	-0.01944	0.051	0.00139	status=JK
YDL118W	YDL118W		0.85832	0.053	0.90631	0.047	-0.06316	0.053	7e-05
YDL119C	YDL119C		0.95526	0.027	0.98962	0.027	-0.03898	0.027	0.00027	status=JK
YDL121C	YDL121C		0.91924	0.134	0.93722	0.046	-0.01925	0.134	0.00084
YDL122W	UBP1		1.0891	0.011	0.95787	0.112	0.10743	0.011	4e-05	status=JK
YDL123W	SNA4		1.00535	0.015	1.04157	0.058	-0.02543	0.015	8e-05	status=JK
YDL124W	YDL124W		1.10189	0.081	1.09756	0.075	0.00433	0.08	0.00011
YDL125C	HNT1		0.98772	0.23	1.02377	0.026	-0.03401	0.23	0.00332
YDL127W	PCL2		0.93339	0.126	0.83742	0.065	0.07553	0.126	0.00067
YDL128W	VCX1		0.98057	0.097	1.02727	0.084	-0.04184	0.097	0.00026
YDL129W	YDL129W		1.01407	0.044	1.03826	0.014	-0.0328	0.044	2e-05
YDL130W	RPP1B		0.94342	0.07	0.96237	0.034	-0.0191	0.07	0.00011
YDL130W-A	STF1		1.15638	0.109	1.12532	0.006	0.02846	0.109	0.00023
YDL131W	LYS21		1.00642	0.091	1.0652	0.044	-0.07359	0.091	0.0002
YDL133C-A	RPL41B		1.13185	0.162	1.16661	0.044	-0.03031	0.162	0.0008
YDL133W	SRF1		1.06092	0.08	0.9979	0.03	0.05298	0.08	0.00012
YDL134C	PPH21		1.02504	0.254	1.03775	0.173	-0.02928	0.253	0.00397
YDL134C-A	YDL134C-A		1.02117	0.186	0.96642	0.102	0.04621	0.186	0.00161
YDL135C	RDI1		0.93941	0.025	0.99553	0.041	-0.0569	0.025	0.00024	status=JK
YDL136W	RPL35B		0.84973	0.025	0.73197	0.218	0.15761	0.025	0.00028	status=JK
YDL137W	ARF2		0.92239	0.216	0.91543	0.138	-0.0168	0.216	0.00338
YDL138W	RGT2		1.08356	0.097	1.08113	0.045	0.00365	0.097	0.0002
YDL142C	CRD1		0.90199	0.003	0.87518	0.033	0.03382	0.003	0	status=JK
YDL144C	YDL144C		1.02687	0.095	1.03081	0.062	-0.0072	0.095	0.00021
YDL146W	LDB17		1.07296	0.039	1.03393	0.028	0.03673	0.039	0.00044	status=JK
YDL149W	ATG9		0.93595	0.072	0.95647	0.02	-0.03275	0.072	0.00012
YDL154W	MSH5		1.02667	0.196	1.11443	0.066	-0.11846	0.196	0.00186
YDL155W	CLB3		1.05115	0.158	1.08621	0.055	-0.03776	0.158	0.00092
YDL156W	CMR1		0.96202	0.16	0.91699	0.058	0.05526	0.16	0.00124
YDL157C	YDL157C		0.92982	0.035	0.84826	0.028	0.07908	0.035	0.00046	status=JK
YDL159W	STE7		0	0	0	0	0	0	#NUM!
YDL160C	DHH1		0	0	0	0	0	0	#NUM!
YDL161W	ENT1		0.92619	0.128	0.96462	0.045	-0.02993	0.127	0.00071
YDL162C	YDL162C		1.03544	0.065	1.01752	0.07	0.02274	0.065	7e-05
YDL167C	NRP1		0.96938	0.058	0.97505	0.02	-0.00271	0.057	6e-05
YDL168W	SFA1		1.11768	0.073	1.08468	0.014	0.03355	0.073	0.00144	status=JK
YDL169C	UGX2		0.9956	0.137	0.94171	0.024	0.04296	0.137	0.00071
YDL170W	UGA3		1.09686	0.037	1.0349	0.04	0.05001	0.037	0.00037	status=JK
YDL171C	GLT1		1.19869	0.149	1.10361	0.141	0.12351	0.149	0.00052
YDL172C	YDL172C		0.79282	0.112	0.85089	0.03	-0.06352	0.112	0.00077
YDL173W	PAR32		0.8462	0.186	0.92792	0.051	-0.10475	0.186	0.00281
YDL174C	DLD1		1.20964	0.027	1.17364	0.062	0.0178	0.027	0
YDL175C	AIR2		1.12117	0.005	1.114	0.096	0.027	0.005	1e-05	status=JK
YDL176W	YDL176W		1.0402	0.079	1.01083	0.096	0.0234	0.079	0.00012
YDL177C	YDL177C		1.0382	0.128	1.06446	0.089	-0.01601	0.128	0.00051
YDL178W	DLD2		1.05169	0.092	1.15234	0.14	-0.10264	0.092	0.00019
YDL179W	PCL9		1.18143	0.029	1.15926	0.061	0.00345	0.029	0
YDL180W	YDL180W		0.85316	0.177	0.99633	0.051	-0.14418	0.177	0.00238
YDL181W	INH1		0.91413	0.148	1.07778	0.085	-0.1871	0.148	0.00114
YDL182W	LYS20		0.90864	0.082	0.9004	0.128	0.00728	0.081	0.0002
YDL183C	YDL183C		0.92617	0.094	0.89331	0.088	0.03491	0.094	0.00029
YDL184C	RPL41A		1.15601	0.042	1.07369	0.108	0.07843	0.042	1e-05
YDL185W	VMA1		1.00674	0.071	1.00855	0.094	0.01658	0.071	0.0001
YDL186W	YDL186W		0.98966	0.105	1.00151	0.108	-0.03584	0.104	0.00032
YDL187C	YDL187C		1.03206	0.074	1.05217	0.027	-0.01517	0.074	0.0001
YDL188C	PPH22		1.0193	0.004	1.02717	0.017	-0.01076	0.004	0	status=JK
YDL189W	RBS1		1.06115	0.009	1.06392	0.033	0.00525	0.009	3e-05	status=JK
YDL190C	UFD2		1.01421	0.017	0.98784	0.029	0.03594	0.017	0
YDL191W	RPL35A		0.77262	0.068	0.84734	0.039	-0.07597	0.068	0.00019
YDL192W	ARF1		0.73832	0.051	0.78877	0.027	-0.04115	0.051	9e-05
YDL194W	SNF3		1.0046	0.01	0.95494	0.028	0.05436	0.01	3e-05	status=JK
YDL197C	ASF2		1.05274	0.055	1.04204	0.016	0.01371	0.055	4e-05
YDL199C	YDL199C		1.04147	0.031	1.02884	0.037	0.00686	0.031	1e-05
YDL200C	MGT1		1.01859	0.159	1.05543	0.027	-0.03157	0.158	0.00102
YDL201W	TRM8		0.98334	0.017	0.95908	0.011	0.02427	0.017	0.00011	status=JK
YDL203C	ACK1		1.00494	0.024	1.01705	0.092	-0.01192	0.024	0
YDL204W	RTN2		1.01452	0.009	0.95122	0.013	0.06307	0.009	3e-05	status=JK
YDL206W	YDL206W		1.02362	0.001	1.0248	0.063	0.00144	0.001	0	status=JK
YDL210W	UGA4		1.06154	0.048	1.06068	0.018	-0.00202	0.048	3e-05
YDL211C	YDL211C		1.04892	0.034	1.0553	0.074	-0.02719	0.034	1e-05
YDL213C	NOP6		0.95242	0.036	1.01698	0.018	-0.06763	0.036	2e-05
YDL214C	PRR2		1.0268	0.023	1.0638	0.04	-0.02491	0.023	0
YDL215C	GDH2		0.9154	0.058	0.90546	0.005	0.01334	0.058	7e-05
YDL216C	RRI1		0.98337	0.026	0.97789	0.005	0.00529	0.026	1e-05
YDL218W	YDL218W		0.98761	0.052	0.98068	0.1	0.00255	0.052	4e-05
YDL219W	DTD1		1.07641	0.035	1.04442	0.031	0.03732	0.035	1e-05
YDL222C	FMP45		1.02891	0.017	1.01128	0.04	0.02756	0.017	9e-05	status=JK
YDL223C	HBT1		1.01063	0.019	1.05257	0.013	-0.03634	0.019	0.00012	status=JK
YDL224C	WHI4		1.05321	0.07	1.02301	0.039	0.03269	0.07	0.00149	status=JK
YDL226C	GCS1		0.98069	0.05	0.99197	0.029	-0.0085	0.05	4e-05
YDL227C	HO		0.95308	0.048	0.93019	0.041	0.02374	0.048	3e-05
YDL229W	SSB1		0.77606	0.045	0.80276	0.081	-0.01588	0.045	5e-05
YDL230W	PTP1		1.0078	0.047	1.01657	0.034	-0.00636	0.047	3e-05
YDL231C	BRE4		1.06184	0.1	1.01154	0.033	0.04621	0.1	0.00023
YDL232W	OST4		0.65185	0.059	0.67667	0.03	-0.01638	0.059	0.0002
YDL233W	MFG1		0.98474	0.031	1.18746	0.019	-0.19812	0.031	0.00033	status=JK
YDL234C	GYP7		0.98155	0.075	0.96438	0.131	0.02327	0.075	0.00012
YDL236W	PHO13		0.94377	0.065	0.89112	0.077	0.04422	0.065	9e-05
YDL237W	AIM6		1.08844	0.064	1.11536	0.011	-0.02572	0.063	5e-05
YDL238C	GUD1		1.0587	0.072	1.06306	0.036	0.00174	0.072	9e-05
YDL239C	ADY3		1.00316	0.038	0.9198	0.021	0.08753	0.038	2e-05
YDL240W	LRG1		0.89027	0.081	0.95267	0.067	-0.0533	0.08	0.0002
YDL241W	YDL241W		1.03149	0.031	1.05617	0.057	-0.03842	0.031	0.0003	status=JK
YDL242W	YDL242W		1.02875	0.036	1.04085	0.034	-0.01731	0.036	1e-05
YDL243C	AAD4		1.06645	0.046	1.05226	0.006	0.01704	0.046	2e-05
YDR001C	NTH1		0.95564	0.019	0.95522	0.028	0.00166	0.019	0.00013	status=JK
YDR003W	RCR2		0.90476	0.116	1.01	0.085	-0.11036	0.116	0.00058
YDR004W	RAD57		0.89523	0.016	0.85695	0.105	0.05138	0.016	0.00011	status=JK
YDR005C	MAF1		0.98123	0.012	0.97351	0.024	0.00197	0.012	0
YDR006C	SOK1		0.82133	0.017	0.90414	0.004	-0.08315	0.017	0
YDR007W	TRP1		1.03229	0.055	1.02527	0.014	0.00467	0.055	4e-05
YDR008C	YDR008C		0.94131	0.018	1.06628	0.018	-0.11415	0.018	0.00012	status=JK
YDR009W	GAL3		1.03871	0.046	1.03623	0.065	0.01321	0.046	2e-05
YDR010C	YDR010C		1.03158	0.028	1.06318	0.104	-0.0334	0.028	0.00024	status=JK
YDR011W	SNQ2		1.05666	0.025	0.96419	0.095	0.09589	0.025	0.00019	status=JK
YDR014W	RAD61		0.9712	0.101	1.0168	0.011	-0.03905	0.101	0.00031
YDR015C	YDR015C		1.06277	0.019	0.98683	0.018	0.08571	0.019	0.0001	status=JK
YDR018C	YDR018C		1.01553	0.037	1.06603	0.076	-0.06855	0.037	1e-05
YDR019C	GCV1		1.05838	0.027	1.01387	0.096	0.03662	0.027	0.00022	status=JK
YDR020C	DAS2		1.01031	0.043	1.04401	0.032	-0.02877	0.043	2e-05
YDR022C	ATG31		1.0898	0.047	1.05503	0.012	0.02966	0.046	2e-05
YDR024W	YDR024W		0.69173	0.019	0.78377	0.06	-0.10148	0.019	1e-05
YDR025W	RPS11A		0.85703	0.034	0.85921	0.08	-0.01922	0.034	0.00053	status=JK
YDR026C	NSI1		1.07897	0.028	1.05589	0.017	0.02217	0.028	0
YDR029W	YDR029W		0.95355	0.067	1.03162	0.024	-0.08341	0.067	0.0001
YDR030C	RAD28		1.07168	0.056	1.04234	0.091	0.0321	0.056	4e-05
YDR031W	MIC14		0.96374	0.075	0.97831	0.094	-0.02678	0.075	0.00013
YDR032C	PST2		1.08202	0.007	0.97893	0.025	0.10924	0.007	2e-05	status=JK
YDR033W	MRH1		0.99289	0.077	1.0239	0.024	-0.01773	0.077	0.00013
YDR034C	LYS14		0.51482	0.058	0.56332	0.035	-0.0444	0.058	0.00039
YDR035W	ARO3		1.05134	0.09	0.98324	0.082	0.08724	0.09	0.00017
YDR036C	EHD3		0.94719	0.059	0.88014	0.024	0.06251	0.059	7e-05
YDR042C	YDR042C		0.89628	0.051	1.08035	0.082	-0.20346	0.051	0.00108	status=JK
YDR043C	NRG1		1.01344	0.119	0.99372	0.135	0.00161	0.119	0.00044
YDR046C	BAP3		1.01047	0.064	1.01727	0.098	-0.00023	0.064	7e-05
YDR048C	YDR048C		0.95804	0.014	1.03302	0.022	-0.07608	0.014	7e-05	status=JK
YDR049W	VMS1		0.86569	0.056	0.95257	0.042	-0.09576	0.056	7e-05
YDR051C	DET1		0.9984	0.089	0.88579	0.034	0.09679	0.089	0.0002
YDR055W	PST1		0.97508	0.03	1.05119	0.095	-0.07129	0.03	1e-05
YDR056C	YDR056C		1.08957	0.038	0.94941	0.152	0.14189	0.038	1e-05
YDR057W	YOS9		1.0717	0.043	1.10222	0.066	-0.04059	0.043	2e-05
YDR058C	TGL2		1.01439	0.068	0.91375	0.015	0.10453	0.068	8e-05
YDR059C	UBC5		1.17273	0.068	1.0144	0.255	0.16453	0.068	5e-05
YDR061W	YDR061W		1.01739	0.061	1.04748	0.018	-0.03954	0.061	6e-05
YDR063W	AIM7		0.98777	0.079	1.06677	0.04	-0.07981	0.078	0.00014
YDR066C	RTR2		1.02667	0.132	1.00072	0.208	0.02628	0.131	0.00057
YDR067C	OCA6		1.07586	0.015	1.09523	0.058	-0.01504	0.015	0
YDR068W	DOS2		1.06843	0.054	1.15544	0.096	-0.12357	0.054	0.00085	status=JK
YDR070C	FMP16		0.8829	0.136	1.07261	0.08	-0.19998	0.136	0.00099
YDR071C	PAA1		0.96992	0.088	0.79807	0.024	0.16578	0.088	0.0002
YDR072C	IPT1		0.97878	0.124	0.98772	0.06	-0.02346	0.123	0.00055
YDR073W	SNF11		1.10566	0.11	1.09547	0.091	0.0041	0.11	0.00027
YDR074W	TPS2		0.969	0.025	0.84707	0.183	0.06469	0.025	0.00022	status=JK
YDR075W	PPH3		1.01715	0.043	1.02984	0.053	-0.0122	0.043	0.0006	status=JK
YDR076W	RAD55		0.85424	0.01	0.83168	0.051	0.00941	0.01	4e-05	status=JK
YDR077W	SED1		0.95102	0.024	0.95478	0.072	-0.0237	0.024	0
YDR080W	VPS41		0.79097	0.033	0.84543	0.033	-0.06134	0.033	2e-05
YDR083W	RRP8		0.75095	0.017	0.81769	0.009	-0.06874	0.017	0
YDR084C	TVP23		1.05826	0.021	1.07845	0.023	-0.02531	0.02	0.00013	status=JK
YDR085C	AFR1		1.09601	0.065	1.09788	0.077	0.01901	0.065	6e-05
YDR089W	YDR089W		1.0795	0.049	1.08178	0.011	-0.00094	0.049	3e-05
YDR090C	YDR090C		1.07879	0.009	1.06902	0.006	0.01062	0.008	2e-05	status=JK
YDR092W	UBC13		0.92847	0.076	0.81555	0.095	0.11298	0.076	0.00015
YDR093W	DNF2		1.09416	0.029	1.03361	0.082	0.04537	0.029	1e-05
YDR094W	YDR094W		1.02901	0.057	1.0044	0.012	0.02461	0.057	5e-05
YDR095C	YDR095C		1.0346	0.025	0.99714	0.046	0.0325	0.025	0
YDR096W	GIS1		0.95937	0.01	1.01991	0.034	-0.05997	0.01	0
YDR097C	MSH6		0.95241	0.012	0.95622	0.044	-0.00817	0.012	5e-05	status=JK
YDR098C	GRX3		1.01382	0.016	1.07821	0.008	-0.06419	0.016	9e-05	status=JK
YDR099W	BMH2		0.86757	0.109	0.90373	0.067	-0.04703	0.108	0.00053
YDR100W	TVP15		0.9967	0.029	1.01582	0.051	-0.00809	0.029	1e-05
YDR101C	ARX1		0.85472	0.009	0.82119	0.022	0.03324	0.009	0
YDR102C	YDR102C		1.03386	0.004	1.01673	0.029	0.01404	0.004	1e-05	status=JK
YDR103W	STE5		0	0	0.00305	0.004	-0.00201	0	#NUM!
YDR104C	SPO71		1.00452	0.034	1.0055	0.055	2e-05	0.034	1e-05
YDR105C	TMS1		1.04423	0.06	1.09126	0.075	-0.06496	0.06	5e-05
YDR107C	TMN2		0.97803	0.042	0.99673	0.044	-0.0126	0.042	2e-05
YDR108W	TRS85		0.9694	0.028	0.93319	0.015	0.03236	0.028	1e-05
YDR109C	YDR109C		1.05894	0.066	1.11333	0.053	-0.06179	0.066	7e-05
YDR110W	FOB1		0.98905	0.026	1.07115	0.061	-0.06508	0.026	0.00023	status=JK
YDR111C	ALT2		0.96166	0.065	0.91886	0.107	0.00567	0.064	8e-05
YDR112W	YDR112W		1.04616	0.059	1.02514	0.019	0.02372	0.059	5e-05
YDR116C	MRPL1		0.79988	0.058	0.79583	0.046	-0.00193	0.058	0.0001
YDR117C	TMA64		0.96044	0.009	0.97554	0.032	-0.01594	0.009	0
YDR119W	VBA4		1.04107	0.109	1.06843	0.189	-0.07626	0.109	0.00032
YDR120C	TRM1		1.0448	0.019	0.98116	0.138	0.04397	0.019	0.00011	status=JK
YDR121W	DPB4		1.03696	0.072	1.01686	0.063	0.02452	0.072	9e-05
YDR122W	KIN1		1.06395	0.015	1.06168	0.009	0.00023	0.015	0
YDR123C	INO2		0.7261	0.029	0.71672	0.009	0.00925	0.029	2e-05
YDR124W	YDR124W		0.99759	0.081	1.01041	0.095	-0.03678	0.08	0.00014
YDR125C	ECM18		1.05705	0.024	1.01596	0.099	0.04032	0.024	0.00018	status=JK
YDR126W	SWF1		0.80167	0.08	0.7911	0.054	0.00404	0.08	0.00027
YDR127W	ARO1		0.78994	0.002	0.80317	0.005	-0.01508	0.002	0	status=JK
YDR128W	MTC5		0.88757	0.026	0.77034	0.041	0.10947	0.026	1e-05
YDR130C	FIN1		1.00266	0.109	1.06932	0.071	-0.06889	0.108	0.00035
YDR131C	YDR131C		1.04821	0.08	1.0124	0.078	0.05507	0.08	0.00012
YDR132C	YDR132C		0.99004	0.04	1.0212	0.016	-0.03278	0.04	2e-05
YDR133C	YDR133C		1.06128	0.003	1.10068	0.041	-0.03983	0.003	0	status=JK
YDR134C	YDR134C		1.05403	0.024	1.00933	0.007	0.04535	0.024	0
YDR135C	YCF1		0.98688	0.03	1.02836	0.051	-0.04824	0.03	1e-05
YDR139C	RUB1		1.00085	0.073	1.0027	0.011	-0.00534	0.073	0.00011
YDR142C	PEX7		0.97793	0.044	0.99135	0.041	-0.00668	0.044	2e-05
YDR143C	SAN1		1.13636	0.007	1.14942	0.023	-0.02524	0.007	1e-05	status=JK
YDR144C	MKC7		0.90657	0.08	0.88896	0.019	0.01441	0.08	0.00019
YDR146C	SWI5		0.96083	0.072	1.02916	0.056	-0.06199	0.072	0.00012
YDR147W	EKI1		0.95342	0.022	0.92231	0.052	0.0144	0.022	0.00017	status=JK
YDR148C	KGD2		1.00998	0.071	1.11813	0.007	-0.10924	0.071	9e-05
YDR149C	YDR149C		0.96758	0.019	0.96954	0.031	-0.00408	0.019	0.00013	status=JK
YDR150W	NUM1		0.93239	0.066	0.93681	0.045	-0.0055	0.066	0.0001
YDR151C	CTH1		1.10172	0.041	1.04806	0.004	0.05388	0.041	1e-05
YDR152W	GIR2		1.12209	0.015	1.08814	0.036	0.02838	0.015	6e-05	status=JK
YDR153C	ENT5		1.11507	0.035	0.98611	0.069	0.13043	0.035	1e-05
YDR154C	YDR154C		0.9121	0.093	0.90056	0.117	0.01276	0.093	0.00029
YDR155C	CPR1		1.09305	0.089	1.00203	0.149	0.09331	0.089	0.00015
YDR156W	RPA14		0.92816	0.01	0.9715	0.082	-0.02102	0.01	4e-05	status=JK
YDR157W	YDR157W		1.013	0.007	1.11579	0.009	-0.1014	0.007	2e-05	status=JK
YDR158W	HOM2		0.88362	0.065	0.86508	0.052	0.0263	0.065	0.00011
YDR159W	SAC3		0.73184	0.09	0.78956	0.035	-0.05126	0.09	0.00051
YDR161W	YDR161W		0.933	0.033	0.9686	0.077	-0.03886	0.032	0.0004	status=JK
YDR162C	NBP2		0.90794	0.188	0.90749	0.117	-0.03629	0.187	0.00234
YDR163W	CWC15		1.0187	0.119	1.14358	0.033	-0.12332	0.118	0.00043
YDR165W	TRM82		0.89409	0.036	0.96051	0.05	-0.06705	0.036	2e-05
YDR169C	STB3		0.84352	0.146	1.05378	0.147	-0.17221	0.145	0.00139
YDR171W	HSP42		1.01997	0.027	0.93949	0.238	0.02438	0.026	0.00023	status=JK
YDR173C	ARG82		0.54095	0.017	0.6151	0.057	-0.08457	0.017	0.00032	status=JK
YDR174W	HMO1		0.65995	0.08	0.69449	0.049	-0.0329	0.08	0.00049
YDR178W	SDH4		0.9852	0.052	1.11909	0.065	-0.13545	0.052	4e-05
YDR179C	CSN9		1.03996	0.108	1.02919	0.16	0.03533	0.108	0.0003
YDR179W-A	YDR179W-A		0.90753	0.119	0.88009	0.129	0.01993	0.119	0.00062
YDR181C	SAS4		0.89727	0.132	0.79897	0.057	0.12164	0.132	0.00086
YDR183W	PLP1		0.93649	0.071	0.95968	0.086	-0.04782	0.071	0.00012
YDR184C	ATC1		0.95752	0.049	0.9113	0.013	0.05023	0.049	4e-05
YDR185C	UPS3		1.09531	0.017	1.13399	0.01	-0.03654	0.016	0
YDR186C	YDR186C		0.99011	0.041	1.00271	0.058	0.00029	0.041	2e-05
YDR191W	HST4		0.99313	0.06	0.83795	0.045	0.1551	0.06	6e-05
YDR192C	NUP42		1.06961	0.052	1.09666	0.027	-0.02283	0.051	3e-05
YDR193W	YDR193W		1.02309	0.034	1.03779	0.003	-0.01336	0.034	1e-05
YDR198C	RKM2		1.05273	0.055	1.0252	0.066	0.03673	0.055	4e-05
YDR199W	YDR199W		1.04004	0.041	1.07263	0.034	-0.03794	0.041	2e-05
YDR202C	RAV2		0.86752	0.07	0.87041	0.115	0.00213	0.069	0.00014
YDR203W	YDR203W		0.98131	0.056	0.9856	0.136	-0.02032	0.056	5e-05
YDR205W	MSC2		1.05807	0.046	1.00832	0.025	0.05557	0.046	2e-05
YDR206W	EBS1		0.97285	0.007	1.00978	0.031	-0.02875	0.007	2e-05	status=JK
YDR207C	UME6		0.61345	0.033	0.66943	0.002	-0.0545	0.033	4e-05
YDR209C	YDR209C		1.01016	0.034	1.01719	0.009	-0.00797	0.033	1e-05
YDR210W	YDR210W		1.00181	0.063	1.08559	0.016	-0.08195	0.063	7e-05
YDR213W	UPC2		1.09629	0.038	0.99681	0.017	0.10142	0.038	1e-05
YDR214W	AHA1		1.01416	0.01	1.08954	0.026	-0.07448	0.01	0
YDR215C	YDR215C		1.01804	0.009	1.05619	0.034	-0.03895	0.009	2e-05	status=JK
YDR216W	ADR1		1.01119	0.034	0.95308	0.003	0.05838	0.034	1e-05
YDR217C	RAD9		1.02618	0.103	0.98401	0.037	0.03296	0.102	0.00027
YDR218C	SPR28		0.91786	0.087	0.95561	0.114	-0.05807	0.087	0.00024
YDR219C	MFB1		0.92584	0.043	0.88196	0.003	0.04371	0.042	3e-05
YDR220C	YDR220C		1.03346	0.026	1.0368	0.062	0	0.026	0
YDR221W	GTB1		1.08226	0.034	1.06027	0.012	0.02209	0.034	1e-05
YDR222W	YDR222W		0.99215	0.08	0.97464	0.008	0.01895	0.08	0.00015
YDR223W	CRF1		1.02883	0.025	1.02701	0.049	-0.00438	0.025	0.0002	status=JK
YDR225W	HTA1		0.8842	0.08	0.85513	0.089	0.00977	0.08	0.0002
YDR227W	SIR4		0	0	0	0	0	0	#NUM!
YDR229W	IVY1		1.05374	0.015	1.04855	0.013	0.00724	0.015	7e-05	status=JK
YDR233C	RTN1		0.94469	0.097	0.9845	0.022	-0.03881	0.096	0.00029
YDR234W	LYS4		0.61707	0.017	0.69535	0.033	-0.07598	0.017	0.00025	status=JK
YDR239C	YDR239C		1.03826	0.024	0.99795	0.071	0.05932	0.024	0.00018	status=JK
YDR241W	YDR241W		0.87397	0.135	0.93181	0.073	-0.07283	0.135	0.001
YDR242W	AMD2		0.96981	0.063	1.02302	0.104	-0.08417	0.063	8e-05
YDR244W	PEX5		0.92506	0.057	0.90569	0.052	0.02247	0.057	6e-05
YDR245W	MNN10		0.82355	0.053	0.89541	0.028	-0.06897	0.053	7e-05
YDR247W	VHS1		0.96598	0.022	0.96267	0.05	0.01055	0.022	0
YDR248C	YDR248C		0.98693	0.035	1.06697	0.019	-0.07571	0.035	1e-05
YDR249C	YDR249C		1.13279	0.036	1.061	0.055	0.04797	0.036	0.00033	status=JK
YDR250C	YDR250C		1.02681	0.077	1.02357	0.038	0.00474	0.077	0.00012
YDR251W	PAM1		1.09769	0.044	1.01808	0.04	0.08913	0.044	2e-05
YDR252W	BTT1		1.07369	0.029	1.06937	0.021	0.0076	0.029	1e-05
YDR253C	MET32		1.0492	0.067	0.99375	0.058	0.04021	0.067	7e-05
YDR254W	CHL4		1.04763	0.04	1.07165	0.091	-0.05173	0.039	1e-05
YDR255C	RMD5		1.0188	0.043	1.04443	0.038	-0.03383	0.043	2e-05
YDR256C	CTA1		1.01575	0.052	1.0237	0.009	-0.00884	0.052	4e-05
YDR257C	RKM4		0.83603	0.079	0.89437	0.044	-0.06107	0.079	0.00023
YDR258C	HSP78		1.00346	0.081	1.00662	0.066	-0.01866	0.081	0.00015
YDR259C	YAP6		1.01105	0.106	1.03944	0.103	-0.03548	0.106	0.00032
YDR260C	SWM1		1.15217	0.03	1.13355	0.041	0.02967	0.03	0
YDR261C	EXG2		1.06555	0.019	1.06308	0.072	-0.00708	0.018	0
YDR262W	YDR262W		1.04129	0.031	1.06401	0.003	-0.02213	0.031	1e-05
YDR263C	DIN7		0.98551	0.083	0.94555	0.024	0.04306	0.083	0.00016
YDR265W	PEX10		1.00756	0.057	0.9686	0.043	0.0531	0.057	5e-05
YDR266C	HEL2		1.06103	0.042	1.09702	0.026	-0.03779	0.042	2e-05
YDR269C	YDR269C		1.09689	0.043	1.05487	0.048	0.03649	0.043	2e-05
YDR270W	CCC2		1.06315	0.034	1.03618	0.023	0.02318	0.034	1e-05
YDR271C	YDR271C		1.00236	0.007	0.97103	0.046	0.0294	0.007	2e-05	status=JK
YDR272W	GLO2		1.02808	0.058	1.02455	0.004	0.00429	0.058	5e-05
YDR273W	DON1		1.1092	0.024	1.01708	0.016	0.08515	0.024	0.00015	status=JK
YDR274C	YDR274C		1.09062	0.057	1.06786	0.098	0.03893	0.057	4e-05
YDR275W	BSC2		0.9514	0.058	0.99106	0.051	-0.03426	0.058	6e-05
YDR276C	PMP3		0.9256	0.025	0.96746	0.041	-0.05295	0.025	1e-05
YDR277C	MTH1		1.00583	0.026	1.026	0.004	-0.01779	0.026	0.00023	status=JK
YDR278C	YDR278C		0.82709	0.02	0.83805	0.073	-0.02605	0.019	0.00019	status=JK
YDR279W	RNH202		0.80668	0.026	0.9622	0.045	-0.16185	0.026	0.00035	status=JK
YDR281C	PHM6		1.08307	0.048	1.0898	0.042	0.00264	0.048	2e-05
YDR282C	YDR282C		1.06452	0.103	1.08749	0.116	-0.05755	0.103	0.00025
YDR284C	DPP1		1.04547	0.006	1.02627	0.044	0.02358	0.006	1e-05	status=JK
YDR285W	ZIP1		1.0817	0.021	1.10965	0.048	0.00037	0.021	0.00012	status=JK
YDR286C	YDR286C		0.98098	0.031	1.01951	0.012	-0.03814	0.031	1e-05
YDR287W	INM2		1.07768	0.074	1.06512	0.051	0.01133	0.074	9e-05
YDR289C	RTT103		0.72513	0.086	0.88413	0.017	-0.15299	0.086	0.00045
YDR290W	YDR290W		0.75021	0.061	0.85823	0.016	-0.10882	0.061	0.00015
YDR291W	HRQ1		0.88821	0.098	0.76711	0.051	0.13786	0.098	0.00037
YDR293C	SSD1		1.24762	0.251	1.21205	0.287	0.03169	0.251	0.00217
YDR294C	DPL1		1.0214	0.049	0.85934	0.181	0.11988	0.049	3e-05
YDR297W	SUR2		0.96768	0.105	0.97469	0.039	0.00037	0.104	0.00035
YDR304C	CPR5		0.95917	0.038	0.93418	0.113	0.02237	0.038	2e-05
YDR305C	HNT2		1.01578	0.104	0.99158	0.06	0.02987	0.104	0.00029
YDR306C	YDR306C		0.94647	0.094	0.93867	0.08	-0.00366	0.094	0.00027
YDR307W	PMT7		0.93747	0.025	0.99498	0.095	-0.0382	0.025	1e-05
YDR309C	GIC2		1.04284	0.009	1.03471	0.034	0.01211	0.009	3e-05	status=JK
YDR310C	SUM1		0.98211	0.054	1.06052	0.048	-0.08145	0.054	5e-05
YDR312W	SSF2		1.13206	0.017	1.16028	0.003	-0.02696	0.017	0
YDR313C	PIB1		1.03578	0.017	1.00936	0.035	0.03233	0.017	9e-05	status=JK
YDR314C	RAD34		1.04697	0.02	1.10168	0.038	-0.04958	0.02	0
YDR315C	IPK1		0.7737	0.054	0.90024	0.026	-0.12503	0.054	9e-05
YDR316W	OMS1		0.96409	0.034	0.87697	0.046	0.09412	0.034	1e-05
YDR317W	HIM1		1.01361	0.073	1.13506	0.061	-0.10675	0.073	0.0001
YDR318W	MCM21		0.96773	0.01	1.05939	0.043	-0.099	0.01	4e-05	status=JK
YDR319C	YFT2		1.04017	0.053	1.04349	0.019	-0.0011	0.053	4e-05
YDR320C	SWA2		0.88786	0.067	0.93165	0.012	-0.04954	0.066	0.00012
YDR321W	ASP1		1.05699	0.063	1.05579	0.071	0.00664	0.063	6e-05
YDR326C	YSP2		1.0647	0.036	0.74294	0.206	0.31896	0.036	0.00039	status=JK
YDR329C	PEX3		0.9851	0.003	0.91113	0.027	0.07929	0.003	0	status=JK
YDR330W	UBX5		1.11377	0.03	1.09967	0.038	0.02284	0.03	1e-05
YDR332W	IRC3		0.99149	0.08	0.98312	0.023	0.00644	0.08	0.00014
YDR333C	YDR333C		1.02309	0.025	1.02304	0.038	0.00279	0.025	0
YDR334W	SWR1		0.71638	0.036	0.74487	0.008	-0.02677	0.036	3e-05
YDR335W	MSN5		0.88896	0.011	0.87295	0.063	0.02445	0.011	6e-05	status=JK
YDR336W	YDR336W		0.82485	0.086	0.77294	0.117	0.04503	0.086	0.00031
YDR338C	YDR338C		0.92413	0.124	0.96929	0.12	-0.01117	0.124	0.00066
YDR340W	YDR340W		0.99893	0.074	1.04187	0.021	-0.04042	0.073	0.00011
YDR344C	YDR344C		1.02907	0.035	1.02211	0.049	0.00557	0.035	1e-05
YDR345C	HXT3		1.03122	0.037	1.02938	0.01	0.00195	0.037	1e-05
YDR346C	SVF1		1.06962	0.02	1.02877	0.043	0.03427	0.02	0
YDR348C	PAL1		0.95766	0.045	0.94201	0.086	0.01296	0.045	3e-05
YDR349C	YPS7		1.03715	0.04	1.02287	0.068	0.02043	0.04	2e-05
YDR351W	SBE2		0.99333	0.009	1.00024	0.033	-0.0075	0.009	0
YDR352W	YPQ2		1.05462	0.063	1.08304	0.093	-0.03652	0.062	6e-05
YDR354W	TRP4		0.95343	0.044	0.95611	0.031	0.00069	0.044	3e-05
YDR357C	CNL1		0.99137	0.03	0.95685	0.08	0.0203	0.03	1e-05
YDR358W	GGA1		1.03171	0.046	1.08621	0.048	-0.05797	0.046	2e-05
YDR359C	EAF1		0.30665	0.062	0.47689	0.035	-0.17152	0.062	0.0022
YDR360W	YDR360W		0.8648	0.03	0.96309	0.029	-0.09607	0.03	1e-05
YDR363W	ESC2		0.99428	0.038	0.93678	0.042	0.06934	0.038	2e-05
YDR363W-A	SEM1		1.04285	0.038	1.03563	0.046	0.03214	0.038	0.00044	status=JK
YDR368W	YPR1		1.05893	0.064	0.98172	0.01	0.08248	0.064	6e-05
YDR369C	XRS2		1.05794	0.017	1.0576	0.025	-0.00027	0.017	0
YDR370C	YDR370C		1.00658	0.005	1.02456	0.061	-0.02704	0.005	1e-05	status=JK
YDR371W	CTS2		0.96012	0.062	1.04809	0.035	-0.08424	0.062	7e-05
YDR372C	VPS74		1.02329	0.048	1.00989	0.041	0.00923	0.048	3e-05
YDR374C	YDR374C		0.98235	0.152	1.00868	0.17	-0.0187	0.152	0.001
YDR375C	BCS1		0.81703	0.037	0.84948	0.003	-0.03317	0.037	3e-05
YDR378C	LSM6		0.69369	0.007	0.72348	0.034	-0.02661	0.007	3e-05	status=JK
YDR379W	RGA2		1.03643	0.058	1.02346	0.033	0.01595	0.057	5e-05
YDR380W	ARO10		1.0437	0.092	0.90945	0.005	0.13461	0.092	0.00019
YDR382W	RPP2B		1.00153	0.069	1.08017	0.077	-0.07551	0.069	9e-05
YDR383C	NKP1		0.86688	0.073	0.87149	0.019	-0.00096	0.073	0.00016
YDR384C	ATO3		0.99589	0.046	1.02105	0.093	-0.04733	0.046	3e-05
YDR385W	EFT2		0.94858	0.037	0.89464	0.025	0.05529	0.037	2e-05
YDR386W	MUS81		1.061	0.01	1.02004	0.028	0.02849	0.01	3e-05	status=JK
YDR387C	YDR387C		0.95424	0.081	1.04937	0.021	-0.09646	0.081	0.00017
YDR388W	RVS167		0.74051	0.019	0.7976	0.031	-0.05959	0.018	0
YDR389W	SAC7		0.90249	0.044	0.92201	0.098	-0.01954	0.044	3e-05
YDR391C	YDR391C		1.0196	0.023	1.07367	0.048	-0.05392	0.023	0
YDR392W	SPT3		0.73316	0.038	0.76378	0.032	-0.02888	0.038	4e-05
YDR393W	SHE9		0.76666	0.014	0.78711	0.037	-0.00987	0.014	0.00011	status=JK
YDR395W	SXM1		1.03165	0.092	1.05819	0.098	-0.04271	0.091	0.00019
YDR399W	HPT1		1.0212	0.011	0.98598	0.057	0.03643	0.011	4e-05	status=JK
YDR400W	URH1		0.9919	0.1	1.04216	0.078	-0.03292	0.1	0.00028
YDR401W	YDR401W		1.09269	0.06	1.10961	0.102	0.00697	0.06	5e-05
YDR402C	DIT2		1.09376	0.077	1.08405	0.075	0.0074	0.077	0.0001
YDR403W	DIT1		1.05537	0.037	0.99111	0.056	0.05616	0.037	1e-05
YDR406W	PDR15		1.06443	0.04	0.93266	0.103	0.15267	0.04	1e-05
YDR408C	ADE8		1.12385	0.02	1.10663	0.018	0.02753	0.02	0.00011	status=JK
YDR409W	SIZ1		0.96172	0.017	1.01418	0.009	-0.04964	0.017	0.00011	status=JK
YDR410C	STE14		0	0	0	0	0	0	#NUM!
YDR411C	DFM1		1.03164	0.02	0.99932	0.032	0.03121	0.02	0
YDR414C	ERD1		0.89661	0.048	1.00187	0.036	-0.08601	0.048	4e-05
YDR415C	YDR415C		0.9115	0.184	0.91991	0.095	-0.00865	0.184	0.00219
YDR419W	RAD30		0.96594	0.081	0.89593	0.129	0.07522	0.08	0.00016
YDR420W	HKR1		0.98447	0.11	0.90948	0.113	0.06461	0.11	0.00038
YDR421W	ARO80		0.99348	0.008	0.91732	0.147	0.08423	0.008	2e-05	status=JK
YDR422C	SIP1		0.98253	0.057	1.09574	0.073	-0.10783	0.057	5e-05
YDR423C	CAD1		1.06959	0.102	0.98803	0.112	0.07432	0.102	0.00024
YDR424C	DYN2		0.99244	0.007	0.95242	0.108	0.05402	0.007	2e-05	status=JK
YDR425W	SNX41		0.8726	0.038	0.84956	0.054	0.01441	0.038	2e-05
YDR426C	YDR426C		0.99652	0.053	0.93905	0.038	0.05436	0.052	4e-05
YDR428C	BNA7		1.07222	0.03	1.02412	0.032	0.04426	0.03	1e-05
YDR430C	CYM1		1.06737	0.028	1.0734	0.008	-0.00962	0.028	1e-05
YDR431W	YDR431W		0.93336	0.063	0.89802	0.016	0.03518	0.062	8e-05
YDR435C	PPM1		0.97273	0.068	1.09674	0.053	-0.12061	0.067	9e-05
YDR436W	PPZ2		1.06834	0.048	1.13069	0.043	-0.05791	0.048	2e-05
YDR438W	THI74		1.03099	0.007	1.01458	0.008	0.01644	0.007	2e-05	status=JK
YDR439W	LRS4		1.049	0.022	1.15196	0.027	-0.10679	0.022	0
YDR440W	DOT1		1.00695	0.108	1.03099	0.09	-0.02866	0.108	0.00034
YDR441C	APT2		0.99247	0.037	0.96563	0.056	0.01501	0.037	1e-05
YDR444W	YDR444W		1.07918	0.056	1.13899	0.011	-0.0588	0.056	4e-05
YDR445C	YDR445C		1.08312	0.043	1.00753	0.034	0.06735	0.042	2e-05
YDR446W	ECM11		1.02316	0.044	1.00144	0.026	0.01614	0.044	2e-05
YDR447C	RPS17B		0.94035	0.041	1.03277	0.036	-0.08468	0.04	2e-05
YDR451C	YHP1		1.02077	0.026	1.0009	0.029	0.01935	0.026	0
YDR452W	PPN1		0.9989	0.014	1.0844	0.061	-0.08722	0.014	7e-05	status=JK
YDR453C	TSA2		1.04236	0.047	0.99701	0.048	0.0493	0.047	3e-05
YDR455C	YDR455C		0.96012	0.127	0.95907	0.084	0.00198	0.127	0.00063
YDR458C	HEH2		0.96006	0.049	1.01171	0.057	-0.04075	0.049	4e-05
YDR459C	PFA5		0.9556	0.033	0.92233	0.019	0.02771	0.033	1e-05
YDR461W	MFA1		0.84425	0.018	0.8775	0.146	-0.06149	0.018	0.00015	status=JK
YDR463W	STP1		0.97435	0.047	0.96752	0.075	0.00586	0.047	3e-05
YDR465C	RMT2		1.04443	0.047	1.11546	0.011	-0.06927	0.047	3e-05
YDR466W	PKH3		1.00567	0.013	0.99629	0.038	0.00759	0.013	5e-05	status=JK
YDR467C	YDR467C		1.04728	0.025	1.0713	0.026	-0.0256	0.025	0
YDR469W	SDC1		0.94618	0.019	0.8837	0.018	0.06269	0.019	0.00013	status=JK
YDR471W	RPL27B		0.86547	0.018	0.86664	0.001	-0.00134	0.018	0
YDR474C	YDR474C		0.94257	0.008	0.99969	0.05	-0.05764	0.008	3e-05	status=JK
YDR475C	JIP4		0.87388	0.033	0.98279	0.028	-0.11799	0.033	1e-05
YDR476C	YDR476C		0.96487	0.053	0.93085	0.041	0.02954	0.053	4e-05
YDR477W	SNF1		0.79767	0.073	0.93313	0.043	-0.1187	0.073	0.00021
YDR479C	PEX29		1.05353	0.063	0.99933	0.038	0.06459	0.063	6e-05
YDR480W	DIG2		1.07788	0.066	1.11955	0.078	-0.03114	0.066	6e-05
YDR481C	PHO8		0.98462	0.017	1.01826	0.079	-0.01689	0.017	0.0001	status=JK
YDR482C	CWC21		0.95163	0.092	0.99963	0.102	-0.05158	0.092	0.00024
YDR483W	KRE2		1.07356	0.041	1.03668	0.044	0.04526	0.041	2e-05
YDR483W	KRE2		1.10198	0.063	1.05578	0.044	0.0659	0.063	5e-05
YDR485C	VPS72		0.71118	0.04	0.84867	0.043	-0.13077	0.04	5e-05
YDR486C	VPS60		0.83891	0.014	0.92972	0.015	-0.09035	0.014	0
YDR488C	PAC11		1.00821	0.044	0.89814	0.025	0.10674	0.044	2e-05
YDR490C	PKH1		1.11356	0.083	1.06989	0.072	0.03018	0.083	0.00011
YDR491C	YDR491C		1.07232	0.069	1.01552	0.047	0.05851	0.069	7e-05
YDR492W	IZH1		1.00487	0.104	1.07103	0.036	-0.05713	0.104	0.0003
YDR493W	MZM1		0.97978	0.069	0.89573	0.163	0.0648	0.069	0.0001
YDR494W	RSM28		1.07111	0.002	1.0056	0.061	0.06896	0.002	0	status=JK
YDR496C	PUF6		0.80341	0.041	0.77163	0.033	0.02274	0.041	4e-05
YDR497C	ITR1		1.05114	0.007	1.08302	0.036	-0.03963	0.007	2e-05	status=JK
YDR500C	RPL37B		0	0	0	0	0	0	#NUM!	status=JK
YDR501W	PLM2		1.06144	0.062	1.11882	0.039	-0.0501	0.062	6e-05
YDR502C	SAM2		1.02891	0.033	0.9898	0.098	0.0314	0.033	0.00034	status=JK
YDR503C	LPP1		1.00241	0.052	1.03797	0.027	-0.04084	0.052	4e-05
YDR504C	SPG3		0.95114	0.031	0.96681	0.029	-0.02111	0.031	1e-05
YDR505C	PSP1		0.94427	0.086	0.93404	0.06	0.02901	0.086	0.00021
YDR506C	GMC1		1.01494	0.104	1.00269	0.042	0.01495	0.104	0.0003
YDR508C	GNP1		1.03945	0.105	0.97758	0.087	0.04712	0.104	0.00028
YDR509W	YDR509W		0.9882	0.082	0.93105	0.036	0.06106	0.082	0.00016
YDR511W	ACN9		1.01604	0.053	1.04492	0.062	-0.02949	0.053	4e-05
YDR512C	EMI1		0.7398	0.055	0.73516	0.021	0.00228	0.055	0.00011
YDR513W	GRX2		0.98233	0.009	1.06846	0.029	-0.09246	0.009	3e-05	status=JK
YDR514C	YDR514C		0.34302	0.296	0.45772	0.329	-0.07117	0.295	0.10306
YDR515W	SLF1		1.00623	0.048	1.0392	0.098	-0.05899	0.048	3e-05
YDR516C	EMI2		1.01391	0.046	1.03153	0.061	-0.01206	0.046	3e-05
YDR517W	GRH1		1.01255	0.032	1.02231	0.035	-0.01731	0.032	1e-05
YDR519W	FPR2		1.00936	0.031	0.98096	0.035	0.03541	0.031	1e-05
YDR520C	URC2		1.06317	0.032	1.04174	0.016	0.01471	0.032	0.0003	status=JK
YDR522C	SPS2		0.99574	0.047	0.99878	0.056	-0.00613	0.047	3e-05
YDR524C	AGE1		1.02803	0.093	0.95193	0.103	0.08183	0.093	0.0002
YDR525W	YDR525W		0.97134	0.084	0.97385	0.042	-0.01304	0.084	0.00018
YDR525W-A	SNA2		1.0271	0.065	1.01081	0.038	0.01327	0.065	7e-05
YDR528W	HLR1		1.03528	0.047	1.08685	0.042	-0.0416	0.047	3e-05
YDR530C	APA2		1.08782	0.029	1.01853	0.019	0.06986	0.029	1e-05
YDR532C	KRE28		0.37704	0.015	0.28014	0.047	0.10023	0.015	0.00055	status=JK
YDR533C	HSP31		1.09347	0.027	0.99321	0.011	0.09883	0.027	0
YDR534C	FIT1		0.91053	0.109	0.95273	0.014	-0.04721	0.109	0.00047
YDR535C	YDR535C		0.89948	0.08	1.0031	0.016	-0.11221	0.08	0.0002
YDR536W	STL1		0.96671	0.075	0.99933	0.029	-0.03198	0.075	0.00013
YDR537C	YDR537C		0.95601	0.038	0.97328	0.004	-0.01958	0.038	2e-05
YDR538W	PAD1		0.86881	0.08	0.8028	0.078	0.07687	0.08	0.00021
YDR539W	FDC1		1.08278	0.106	0.92709	0.113	0.16295	0.106	0.00026
YDR540C	IRC4		1.01702	0.105	1.04901	0.026	-0.02011	0.105	0.0003
YDR541C	YDR541C		1.10435	0.032	1.00028	0.043	0.0948	0.032	0.00028	status=JK
YEL001C	IRC22		#NUM!	#NUM!	#NUM!	#NUM!	#NUM!	#NUM!	#NUM!	status=LK
YEL003W	GIM4		#NUM!	#NUM!	#NUM!	#NUM!	#NUM!	#NUM!	#NUM!	status=LK
YEL004W	YEA4		#NUM!	#NUM!	#NUM!	#NUM!	#NUM!	#NUM!	#NUM!	status=LK
YEL005C	VAB2		#NUM!	#NUM!	#NUM!	#NUM!	#NUM!	#NUM!	#NUM!	status=LK
YEL006W	YEA6		#NUM!	#NUM!	#NUM!	#NUM!	#NUM!	#NUM!	#NUM!	status=LK
YEL007W	MIT1		#NUM!	#NUM!	#NUM!	#NUM!	#NUM!	#NUM!	#NUM!	status=LK
YEL008W	YEL008W		#NUM!	#NUM!	#NUM!	#NUM!	#NUM!	#NUM!	#NUM!	status=LK
YEL010W	YEL010W		#NUM!	#NUM!	#NUM!	#NUM!	#NUM!	#NUM!	#NUM!	status=LK
YEL011W	GLC3		#NUM!	#NUM!	#NUM!	#NUM!	#NUM!	#NUM!	#NUM!	status=LK
YEL012W	UBC8		#NUM!	#NUM!	#NUM!	#NUM!	#NUM!	#NUM!	#NUM!	status=LK
YEL013W	VAC8		#NUM!	#NUM!	#NUM!	#NUM!	#NUM!	#NUM!	#NUM!	status=LK
YEL014C	YEL014C		#NUM!	#NUM!	#NUM!	#NUM!	#NUM!	#NUM!	#NUM!	status=LK
YEL015W	EDC3		#NUM!	#NUM!	#NUM!	#NUM!	#NUM!	#NUM!	#NUM!	status=LK
YEL016C	NPP2		#NUM!	#NUM!	#NUM!	#NUM!	#NUM!	#NUM!	#NUM!	status=LK
YEL017C-A	PMP2		#NUM!	#NUM!	#NUM!	#NUM!	#NUM!	#NUM!	#NUM!	status=LK
YEL017W	GTT3		#NUM!	#NUM!	#NUM!	#NUM!	#NUM!	#NUM!	#NUM!	status=LK
YEL020C	YEL020C		#NUM!	#NUM!	#NUM!	#NUM!	#NUM!	#NUM!	#NUM!	status=LK
YEL023C	YEL023C		#NUM!	#NUM!	#NUM!	#NUM!	#NUM!	#NUM!	#NUM!	status=LK
YEL025C	YEL025C		#NUM!	#NUM!	#NUM!	#NUM!	#NUM!	#NUM!	#NUM!	status=LK
YEL028W	YEL028W		#NUM!	#NUM!	#NUM!	#NUM!	#NUM!	#NUM!	#NUM!	status=LK
YEL030W	ECM10		#NUM!	#NUM!	#NUM!	#NUM!	#NUM!	#NUM!	#NUM!	status=LK
YEL031W	SPF1		#NUM!	#NUM!	#NUM!	#NUM!	#NUM!	#NUM!	#NUM!	status=LK
YEL033W	MTC7		#NUM!	#NUM!	#NUM!	#NUM!	#NUM!	#NUM!	#NUM!	status=LK
YEL037C	RAD23		#NUM!	#NUM!	#NUM!	#NUM!	#NUM!	#NUM!	#NUM!	status=LK
YEL038W	UTR4		#NUM!	#NUM!	#NUM!	#NUM!	#NUM!	#NUM!	#NUM!	status=LK
YEL039C	CYC7		#NUM!	#NUM!	#NUM!	#NUM!	#NUM!	#NUM!	#NUM!	status=LK
YEL040W	UTR2		#NUM!	#NUM!	#NUM!	#NUM!	#NUM!	#NUM!	#NUM!	status=LK
YEL041W	YEF1		#NUM!	#NUM!	#NUM!	#NUM!	#NUM!	#NUM!	#NUM!	status=LK
YEL042W	GDA1		#NUM!	#NUM!	#NUM!	#NUM!	#NUM!	#NUM!	#NUM!	status=LK
YEL043W	YEL043W		#NUM!	#NUM!	#NUM!	#NUM!	#NUM!	#NUM!	#NUM!	status=LK
YEL047C	FRD1		#NUM!	#NUM!	#NUM!	#NUM!	#NUM!	#NUM!	#NUM!	status=LK
YEL048C	TCA17		#NUM!	#NUM!	#NUM!	#NUM!	#NUM!	#NUM!	#NUM!	status=LK
YEL049W	PAU2		#NUM!	#NUM!	#NUM!	#NUM!	#NUM!	#NUM!	#NUM!	status=LK
YEL052W	AFG1		#NUM!	#NUM!	#NUM!	#NUM!	#NUM!	#NUM!	#NUM!	status=LK
YEL053C	MAK10		#NUM!	#NUM!	#NUM!	#NUM!	#NUM!	#NUM!	#NUM!	status=LK
YEL056W	HAT2		#NUM!	#NUM!	#NUM!	#NUM!	#NUM!	#NUM!	#NUM!	status=LK
YEL057C	YEL057C		#NUM!	#NUM!	#NUM!	#NUM!	#NUM!	#NUM!	#NUM!	status=LK
YEL059W	YEL059W		#NUM!	#NUM!	#NUM!	#NUM!	#NUM!	#NUM!	#NUM!	status=LK
YEL060C	PRB1		#NUM!	#NUM!	#NUM!	#NUM!	#NUM!	#NUM!	#NUM!	status=LK
YEL061C	CIN8		#NUM!	#NUM!	#NUM!	#NUM!	#NUM!	#NUM!	#NUM!	status=LK
YEL062W	NPR2		#NUM!	#NUM!	#NUM!	#NUM!	#NUM!	#NUM!	#NUM!	status=LK
YEL063C	CAN1		#NUM!	#NUM!	#NUM!	#NUM!	#NUM!	#NUM!	#NUM!	status=LK
YEL064C	AVT2		#NUM!	#NUM!	#NUM!	#NUM!	#NUM!	#NUM!	#NUM!	status=LK
YEL065W	SIT1		#NUM!	#NUM!	#NUM!	#NUM!	#NUM!	#NUM!	#NUM!	status=LK
YEL066W	HPA3		#NUM!	#NUM!	#NUM!	#NUM!	#NUM!	#NUM!	#NUM!	status=LK
YEL067C	YEL067C		#NUM!	#NUM!	#NUM!	#NUM!	#NUM!	#NUM!	#NUM!	status=LK
YEL068C	YEL068C		#NUM!	#NUM!	#NUM!	#NUM!	#NUM!	#NUM!	#NUM!	status=LK
YEL071W	DLD3		#NUM!	#NUM!	#NUM!	#NUM!	#NUM!	#NUM!	#NUM!	status=LK
YER001W	MNN1		#NUM!	#NUM!	#NUM!	#NUM!	#NUM!	#NUM!	#NUM!	status=LK
YER002W	NOP16		#NUM!	#NUM!	#NUM!	#NUM!	#NUM!	#NUM!	#NUM!	status=LK
YER004W	FMP52		#NUM!	#NUM!	#NUM!	#NUM!	#NUM!	#NUM!	#NUM!	status=LK
YER005W	YND1		#NUM!	#NUM!	#NUM!	#NUM!	#NUM!	#NUM!	#NUM!	status=LK
YER007C-A	TMA20		#NUM!	#NUM!	#NUM!	#NUM!	#NUM!	#NUM!	#NUM!	status=LK
YER007W	PAC2		#NUM!	#NUM!	#NUM!	#NUM!	#NUM!	#NUM!	#NUM!	status=LK
YER010C	YER010C		#NUM!	#NUM!	#NUM!	#NUM!	#NUM!	#NUM!	#NUM!	status=LK
YER011W	TIR1		#NUM!	#NUM!	#NUM!	#NUM!	#NUM!	#NUM!	#NUM!	status=LK
YER016W	BIM1		#NUM!	#NUM!	#NUM!	#NUM!	#NUM!	#NUM!	#NUM!	status=LK
YER019C-A	SBH2		#NUM!	#NUM!	#NUM!	#NUM!	#NUM!	#NUM!	#NUM!	status=LK
YER019W	ISC1		#NUM!	#NUM!	#NUM!	#NUM!	#NUM!	#NUM!	#NUM!	status=LK
YER020W	GPA2		#NUM!	#NUM!	#NUM!	#NUM!	#NUM!	#NUM!	#NUM!	status=LK
YER024W	YAT2		#NUM!	#NUM!	#NUM!	#NUM!	#NUM!	#NUM!	#NUM!	status=LK
YER027C	GAL83		#NUM!	#NUM!	#NUM!	#NUM!	#NUM!	#NUM!	#NUM!	status=LK
YER028C	MIG3		#NUM!	#NUM!	#NUM!	#NUM!	#NUM!	#NUM!	#NUM!	status=LK
YER030W	CHZ1		#NUM!	#NUM!	#NUM!	#NUM!	#NUM!	#NUM!	#NUM!	status=LK
YER031C	YPT31		#NUM!	#NUM!	#NUM!	#NUM!	#NUM!	#NUM!	#NUM!	status=LK
YER032W	FIR1		#NUM!	#NUM!	#NUM!	#NUM!	#NUM!	#NUM!	#NUM!	status=LK
YER033C	ZRG8		#NUM!	#NUM!	#NUM!	#NUM!	#NUM!	#NUM!	#NUM!	status=LK
YER034W	YER034W		#NUM!	#NUM!	#NUM!	#NUM!	#NUM!	#NUM!	#NUM!	status=LK
YER035W	EDC2		#NUM!	#NUM!	#NUM!	#NUM!	#NUM!	#NUM!	#NUM!	status=LK
YER038W-A	YER038W-A		#NUM!	#NUM!	#NUM!	#NUM!	#NUM!	#NUM!	#NUM!	status=LK
YER039C	HVG1		#NUM!	#NUM!	#NUM!	#NUM!	#NUM!	#NUM!	#NUM!	status=LK
YER039C-A	YER039C-A		#NUM!	#NUM!	#NUM!	#NUM!	#NUM!	#NUM!	#NUM!	status=LK
YER041W	YEN1		0.88912	0.098	0.99218	0.074	-0.10661	0.097	0.00036
YER042W	MXR1		1.03018	0.018	0.99762	0.008	0.03196	0.018	0.0001	status=JK
YER044C-A	MEI4		0.88792	0.059	0.89496	0.041	-0.01595	0.059	8e-05
YER045C	ACA1		1.00301	0.136	1.02823	0.056	-0.02645	0.135	0.00067
YER046W	SPO73		1.04867	0.027	1.03474	0.021	0.01877	0.027	0.00022	status=JK
YER046W-A	YER046W-A		0.96179	0.045	0.87081	0.027	0.09697	0.045	3e-05
YER047C	SAP1		0.92278	0.004	0.85555	0.019	0.0712	0.004	0	status=JK
YER048C	CAJ1		0.91742	0.019	1.01458	0.034	-0.09266	0.019	0.00014	status=JK
YER049W	TPA1		1.01482	0.017	1.00454	0.045	0.00622	0.017	0
YER051W	JHD1		1.13159	0.014	1.13469	0.021	0.00314	0.014	5e-05	status=JK
YER052C	HOM3		0.93468	0.061	1.01287	0.004	-0.0764	0.061	8e-05
YER053C	PIC2		1.11778	0.016	1.12775	0.05	-0.00402	0.016	0
YER054C	GIP2		1.12912	0.102	1.11792	0.031	0.01316	0.101	0.0002
YER055C	HIS1		0.69557	0.026	0.47733	0.105	0.22315	0.026	2e-05
YER056C	FCY2		1.10112	0.018	1.02791	0.012	0.06703	0.018	9e-05	status=JK
YER056C-A	RPL34A		0.93033	0.033	0.85248	0.02	0.07305	0.033	1e-05
YER057C	HMF1		1.05735	0.072	1.09975	0.034	-0.04497	0.072	9e-05
YER059W	PCL6		0.94861	0.186	0.993	0.075	-0.03302	0.186	0.00202
YER060W	FCY21		0.96838	0.059	1.02753	0.034	-0.05788	0.059	6e-05
YER060W-A	FCY22		0.95353	0.005	1.00429	0.032	-0.05587	0.005	1e-05	status=JK
YER061C	CEM1		0.88092	0.078	0.8607	0.027	0.02852	0.078	0.00019
YER062C	HOR2		1.0168	0.035	1.05316	0.023	-0.0329	0.035	1e-05
YER063W	THO1		1.06298	0.022	0.99916	0.017	0.06363	0.021	0
YER064C	VHR2		1.04485	0.035	1.00805	0.012	0.03779	0.035	1e-05
YER065C	ICL1		1.09646	0.057	0.9729	0.048	0.12002	0.057	4e-05
YER066C-A	YER066C-A		0.96669	0.042	1.0081	0.035	-0.03561	0.042	2e-05
YER066W	RRT13		1.00263	0.03	0.97711	0.007	0.02651	0.03	1e-05
YER067C-A	YER067C-A		0.99559	0.048	0.98783	0.034	0.00218	0.048	3e-05
YER067W	RGI1		0.98098	0.025	0.96606	0.092	-0.00204	0.025	0.00022	status=JK
YER069W	ARG5		0.66683	0.001	0.67175	0.01	-0.00319	0.001	0	status=JK
YER071C	TDA2		0.9329	0.026	0.99537	0.015	-0.06567	0.026	1e-05
YER072W	VTC1		1.00932	0.009	1.0425	0.026	-0.03764	0.009	3e-05	status=JK
YER073W	ALD5		1.05817	0.007	1.03725	0.024	0.02918	0.007	2e-05	status=JK
YER074W	RPS24A		0.66745	0.026	0.6943	0.011	-0.03214	0.026	2e-05
YER075C	PTP3		0.92255	0.064	0.98414	0.047	-0.05482	0.064	9e-05
YER077C	YER077C		1.03644	0.018	1.02934	0.041	0.00282	0.018	0
YER078C	ICP55		0.80356	0.121	0.89609	0.085	-0.08622	0.12	0.00091
YER079W	YER079W		1.03052	0.008	0.98622	0.033	0.0501	0.008	2e-05	status=JK
YER080W	AIM9		1.02991	0.056	1.11476	0.035	-0.06529	0.056	4e-05
YER081W	SER3		0.99257	0.082	0.96753	0.103	0.01364	0.082	0.00015
YER083C	GET2		0.90369	0.069	0.88022	0.023	0.01962	0.069	0.00012
YER084W	YER084W		1.05311	0.02	1.05076	0.009	0.00468	0.02	0
YER085C	YER085C		1.07218	0.005	1.10632	0.049	-0.02216	0.005	1e-05	status=JK
YER087C-A	YER087C-A		1.00256	0.039	1.07162	0.003	-0.06778	0.039	2e-05
YER088C	DOT6		1.02129	0.038	1.00755	0.007	0.01097	0.037	1e-05
YER089C	PTC2		0.9652	0.029	1.00258	0.028	-0.02716	0.029	1e-05
YER090W	TRP2		1.06016	0.127	1.0043	0.088	0.0359	0.127	0.00047
YER091C	MET6		0.90294	0.014	0.99293	0.005	-0.08989	0.014	8e-05	status=JK
YER091C-A	YER091C-A		1.07146	0.036	0.97288	0.051	0.11079	0.036	1e-05
YER092W	IES5		0.91769	0.022	0.91687	0.003	0.00077	0.022	0
YER093C-A	AIM11		0.78718	0.081	0.71683	0.063	0.07198	0.081	0.00029
YER095W	RAD51		1.00198	0.035	0.96832	0.011	0.03362	0.035	1e-05
YER096W	SHC1		0.93662	0.049	0.94753	0.063	0.00312	0.049	4e-05
YER097W	YER097W		1.03768	0.039	1.05837	0.011	-0.02419	0.039	1e-05
YER098W	UBP9		1.01158	0.035	0.95434	0.057	0.05478	0.035	1e-05
YER101C	AST2		1.02963	0.084	1.01293	0.005	0.0176	0.084	0.00015
YER106W	MAM1		0.89666	0.068	0.9932	0.065	-0.12442	0.067	0.00012
YER108C	YER108C		1.04153	0.039	1.04295	0.051	0.0063	0.039	1e-05
YER109C	FLO8		0.96181	0.071	0.97194	0.042	-0.01518	0.071	0.00011
YER111C	SWI4		1.02144	0.057	0.96107	0.013	0.06549	0.057	5e-05
YER113C	TMN3		1.08934	0.061	1.04132	0.039	0.055	0.061	5e-05
YER114C	BOI2		1.02228	0.051	1.02652	0.055	-0.00624	0.051	3e-05
YER115C	SPR6		1.1147	0.027	1.10995	0.076	0.00332	0.027	0
YER116C	SLX8		0.60249	0.014	0.49525	0.075	0.11562	0.014	0
YER117W	RPL23B		0.89143	0.047	0.92494	0.048	-0.04019	0.047	4e-05
YER118C	SHO1		1.03438	0.007	0.99706	0.031	0.02029	0.007	1e-05	status=JK
YER119C	AVT6		1.03483	0.073	0.98243	0.06	0.05912	0.072	9e-05
YER119C-A	YER119C-A		0.86911	0.089	0.79524	0.034	0.0787	0.089	0.00029
YER120W	SCS2		0.78443	0.007	0.74454	0.047	0.04457	0.007	2e-05	status=JK
YER121W	YER121W		1.02503	0.077	0.97549	0.019	0.04183	0.077	0.00012
YER123W	YCK3		0.9361	0.075	0.93826	0.016	-0.01126	0.075	0.00014
YER124C	DSE1		0.95165	0.009	0.97924	0.051	-0.02704	0.009	3e-05	status=JK
YER128W	VFA1		1.0468	0.047	1.02255	0.019	0.02954	0.047	3e-05
YER129W	SAK1		1.04372	0.021	1.02442	0.023	0.02481	0.021	0
YER130C	YER130C		1.04605	0.037	1.07915	0.009	-0.03745	0.037	1e-05
YER131W	RPS26B		0.83999	0.014	0.66797	0.084	0.18639	0.014	9e-05	status=JK
YER132C	PMD1		0.98745	0.067	0.95779	0.088	0.00558	0.067	9e-05
YER134C	YER134C		0.90053	0.098	0.92474	0.105	-0.02406	0.098	0.00035
YER135C	YER135C		0.93785	0.099	0.93161	0.158	-0.04038	0.099	0.00032
YER137C	YER137C		0.98669	0.074	1.05901	0.075	-0.06604	0.074	0.00012
YER139C	RTR1		0.92475	0.082	0.9544	0.138	-0.06612	0.081	0.00019
YER140W	YER140W		1.04703	0.056	1.04051	0.06	0.01948	0.056	4e-05
YER142C	MAG1		1.01788	0.025	1.02011	0.047	-0.00547	0.025	0
YER143W	DDI1		1.02261	0.079	0.99876	0.01	0.02501	0.079	0.00013
YER144C	UBP5		1.07774	0.044	1.03214	0.043	0.05535	0.044	2e-05
YER145C	FTR1		0.91192	0.086	0.97467	0.003	-0.06292	0.086	0.00023
YER149C	PEA2		1.02907	0.023	1.00486	0.069	0.0072	0.023	0.00016	status=JK
YER150W	SPI1		1.04875	0.047	1.06691	0.014	-0.01749	0.047	2e-05
YER151C	UBP3		0.90168	0.006	0.83593	0.021	0.06091	0.006	2e-05	status=JK
YER152C	YER152C		1.11001	0.039	1.07097	0.024	0.04399	0.039	1e-05
YER153C	PET122		0.81201	0.033	0.85883	0.02	-0.05381	0.033	2e-05
YER155C	BEM2		0.96173	0.009	0.96609	0.039	0.00187	0.009	3e-05	status=JK
YER156C	YER156C		0.85985	0.036	0.94348	0.008	-0.08664	0.036	2e-05
YER158C	YER158C		1.15931	0.071	1.17095	0.061	0.00519	0.071	6e-05
YER161C	SPT2		0.94943	0.022	0.95773	0.068	-0.0092	0.022	0.00019	status=JK
YER162C	RAD4		0.66028	0.186	0.57563	0.174	0.12575	0.185	0.00574
YER163C	GCG1		1.01717	0.032	1.00885	0.034	0.00981	0.032	1e-05
YER164W	CHD1		0.9309	0.058	0.99974	0.038	-0.06672	0.058	7e-05
YER166W	DNF1		0.9806	0.021	0.9435	0.08	0.05404	0.021	0.00015	status=JK
YER167W	BCK2		0.98482	0.048	0.99946	0.024	-0.01433	0.048	3e-05
YER170W	ADK2		1.03763	0.037	1.02362	0.013	0.01267	0.037	1e-05
YER173W	RAD24		1.05266	0.048	1.03234	0.012	0.02048	0.048	3e-05
YER174C	GRX4		1.07282	0.016	0.9887	0.004	0.08536	0.016	7e-05	status=JK
YER175C	TMT1		0.97862	0.027	0.93757	0.043	0.03451	0.027	1e-05
YER176W	ECM32		1.03253	0.048	0.97992	0.045	0.04982	0.048	3e-05
YER177W	BMH1		0.79225	0.106	0.76489	0.113	0.025	0.106	0.00066
YER178W	PDA1		0.78976	0.075	0.8016	0.077	-0.02438	0.075	0.00023
YER179W	DMC1		1.01218	0.054	0.95797	0.039	0.04321	0.054	4e-05
YER180C	ISC10		1.05565	0.01	0.99937	0.026	0.059	0.01	3e-05	status=JK
YER181C	YER181C		1.02162	0.018	1.02006	0.031	0.00011	0.018	0
YER182W	FMP10		1.06323	0.026	1.00006	0.03	0.06392	0.026	0
YER183C	FAU1		1.03543	0.008	1.03195	0.012	0.00711	0.008	2e-05	status=JK
YER184C	YER184C		1.05954	0.033	1.07009	0.009	-0.01108	0.033	1e-05
YER185W	PUG1		1.03136	0.042	1.03252	0.003	-0.00258	0.042	2e-05
YER186C	YER186C		1.06153	0.033	0.9997	0.009	0.05756	0.033	1e-05
YER187W	YER187W		1.04547	0.006	1.08496	0.034	-0.04181	0.006	1e-05	status=JK
YER188W	YER188W		1.02745	0.042	1.02698	0.015	0.00465	0.042	2e-05
YFL001W	DEG1		0.77017	0.016	0.73338	0.008	0.03473	0.016	0.00014	status=JK
YFL003C	MSH4		1.16162	0.053	1.08345	0.034	0.06976	0.053	3e-05
YFL004W	VTC2		1.10073	0.054	1.04354	0.013	0.06112	0.054	3e-05
YFL006W	YFL006W		0.98017	0.075	0.96741	0.09	-0.01046	0.075	0.00012
YFL007W	BLM10		0.99415	0.07	0.92862	0.005	0.06715	0.07	0.0001
YFL010C	WWM1		0.72062	0.338	0.99654	0.12	-0.28705	0.338	0.02375
YFL010W-A	AUA1		1.04608	0.043	1.09304	0.041	-0.04407	0.043	2e-05
YFL011W	HXT10		0.96896	0.051	1.00313	0.041	-0.02899	0.051	4e-05
YFL012W	YFL012W		0.97544	0.007	0.98659	0.006	-0.01249	0.007	2e-05	status=JK
YFL013C	IES1		0.93178	0.11	0.96703	0.082	-0.02697	0.109	0.00044
YFL013W-A	YFL013W-A		0.87115	0.111	0.89729	0.057	-0.01806	0.111	0.00056
YFL014W	HSP12		1.04114	0.01	1.00665	0.064	0.04876	0.01	3e-05	status=JK
YFL015C	YFL015C		0.98128	0.221	1.07982	0.061	-0.13174	0.221	0.00301
YFL018C	LPD1		0.98604	0.054	0.99187	0.006	-0.0068	0.054	5e-05
YFL019C	YFL019C		0.9226	0.017	1.00384	0.017	-0.0783	0.017	0.00011	status=JK
YFL020C	PAU5		1.03318	0.056	1.02367	0.016	0.00563	0.056	4e-05
YFL021W	GAT1		0.99811	0.061	1.06308	0.072	-0.04636	0.061	6e-05
YFL023W	BUD27		0.70765	0.015	0.82046	0.005	-0.1102	0.015	0
YFL025C	BST1		0.93435	0.086	1.01799	0.082	-0.10356	0.086	0.00021
YFL026W	STE2		0	0	0	0	0	0	#NUM!
YFL027C	GYP8		1.03483	0.034	1.00043	0.034	0.04393	0.034	1e-05
YFL028C	CAF16		1.07912	0.038	1.03706	0.005	0.04427	0.038	1e-05
YFL030W	AGX1		0.98862	0.052	0.93605	0.045	0.06082	0.052	4e-05
YFL031W	HAC1		0.9903	0.013	0.95381	0.061	0.03189	0.013	6e-05	status=JK
YFL032W	YFL032W		0.94335	0.068	1.03512	0.045	-0.0961	0.068	0.0001
YFL033C	RIM15		1.04444	0.058	1.02974	0.079	0.01175	0.058	5e-05
YFL034C-A	RPL22B		1.04006	0.026	1.10301	0.068	-0.09943	0.026	0
YFL034W	YFL034W		1.02266	0.062	1.03988	0.031	-0.00993	0.061	6e-05
YFL035C-B	YFL035C-B		1.05634	0.05	1.03856	0.041	0.02776	0.05	3e-05
YFL036W	RPO41		0.70559	0.012	0.64149	0.081	0.04665	0.012	0
YFL040W	YFL040W		1.01997	0.02	0.9985	0.05	0.02965	0.02	0
YFL041W	FET5		1.0458	0.036	1.05403	0.061	-0.02193	0.036	1e-05
YFL042C	YFL042C		1.07637	0.026	1.06557	0.013	0.00704	0.025	0
YFL043C	YFL043C		1.05266	0.032	0.98858	0.046	0.06368	0.032	1e-05
YFL044C	OTU1		1.01792	0.02	1.05494	0.018	-0.03648	0.02	0
YFL046W	FMP32		0.98327	0.023	1.01758	0.043	-0.04029	0.023	0
YFL047W	RGD2		0.96402	0.072	0.9457	0.12	0.04378	0.071	0.00011
YFL048C	EMP47		0.94641	0.236	1.11428	0.049	-0.16503	0.236	0.00407
YFL049W	SWP82		1.03562	0.014	1.01332	0.14	0.01461	0.014	6e-05	status=JK
YFL050C	ALR2		0.98022	0.015	1.0535	0.028	-0.07636	0.015	0
YFL051C	YFL051C		0.988	0.002	0.93381	0.082	0.05725	0.002	0	status=JK
YFL052W	YFL052W		1.05628	0.031	1.04685	0.022	0.0148	0.031	1e-05
YFL053W	DAK2		1.06865	0.015	1.04906	0.024	0.01993	0.015	7e-05	status=JK
YFL054C	YFL054C		1.05556	0.006	1.06752	0.036	-0.00403	0.006	0
YFL055W	AGP3		1.02772	0.042	1.05768	0.028	-0.02503	0.042	2e-05
YFL056C	AAD6		0.99854	0.037	0.95329	0.104	0.05811	0.037	1e-05
YFL063W	YFL063W		1.14129	0.04	1.14372	0.036	-0.0149	0.04	0.00041	status=JK
YFR006W	YFR006W		1.07785	0.018	1.05185	0.035	0.02972	0.018	9e-05	status=JK
YFR007W	YFH7		0.98637	0.065	0.96295	0.018	0.02342	0.065	8e-05
YFR008W	FAR7		1.02204	0.072	0.93336	0.041	0.08656	0.072	0.0001
YFR009W	GCN20		1.00691	0.028	0.97938	0.046	0.02772	0.027	0.00025	status=JK
YFR010W	UBP6		0.88683	0.022	0.74375	0.057	0.13878	0.022	0
YFR011C	AIM13		0.93634	0.061	0.91724	0.032	0.03273	0.061	8e-05
YFR012W	DCV1		0.93606	0.192	0.94428	0.126	0.00847	0.191	0.00228
YFR013W	IOC3		0.92553	0.08	0.92606	0.066	0.01004	0.08	0.00018
YFR014C	CMK1		0.98573	0.086	0.99565	0.078	-0.00658	0.086	0.00018
YFR015C	GSY1		1.05097	0.046	1.06313	0.008	-0.01196	0.046	2e-05
YFR016C	YFR016C		1.10136	0.07	1.07685	0.032	0.02235	0.069	7e-05
YFR017C	IGD1		1.05737	0.003	1.04044	0.019	0.01671	0.003	0	status=JK
YFR018C	YFR018C		1.07671	0.06	1.09401	0.035	-0.00836	0.06	5e-05
YFR019W	FAB1		0.71998	0.054	0.69879	0.035	0.03145	0.054	0.00012
YFR020W	YFR020W		1.07947	0.02	1.08268	0.08	0.00177	0.02	0
YFR021W	ATG18		0.94262	0.088	0.90263	0.042	0.04824	0.088	0.00022
YFR022W	ROG3		1.02622	0.036	1.0644	0.038	-0.0369	0.036	1e-05
YFR023W	PES4		1.09828	0.051	1.02861	0.04	0.07109	0.051	0.00072	status=JK
YFR024C	YFR024C		0.9998	0.091	1.03086	0.019	-0.02314	0.091	0.00021
YFR024C-A	LSB3		1.05642	0.093	1.06998	0.04	-0.01952	0.093	0.00019
YFR025C	HIS2		0.64819	0.061	0.61793	0.02	0.03076	0.061	0.00023
YFR026C	ULI1		0.9776	0.002	0.98987	0.002	-0.0105	0.002	0	status=JK
YFR030W	MET10		1.04065	0.018	0.98441	0.036	0.06117	0.018	0
YFR031C-A	RPL2A		0.92049	0.053	0.92862	0.014	-0.01108	0.053	5e-05
YFR032C	RRT5		1.0709	0.051	1.06698	0.066	0.01161	0.051	3e-05
YFR032C-A	RPL29		0.8976	0.007	0.92216	0.007	-0.02712	0.007	2e-05	status=JK
YFR033C	QCR6		0.93091	0.008	0.92938	0.032	-0.00573	0.008	2e-05	status=JK
YFR034C	PHO4		0.87737	0.052	0.95755	0.035	-0.08033	0.052	6e-05
YFR035C	YFR035C		1.00938	0.016	1.04365	0.056	-0.02389	0.016	8e-05	status=JK
YFR038W	IRC5		1.08347	0.042	1.03129	0.023	0.06582	0.042	0.0005	status=JK
YFR039C	YFR039C		1.04836	0.007	1.01636	0.008	0.03408	0.006	1e-05	status=JK
YFR040W	SAP155		0.88042	0.07	0.88899	0.061	-0.01933	0.07	0.00014
YFR041C	ERJ5		0.99135	0.032	0.98896	0.012	0.00996	0.032	0.00035	status=JK
YFR043C	IRC6		1.08176	0.033	1.10134	0.026	-0.01603	0.033	1e-05
YFR044C	DUG1		1.0033	0.06	1.03436	0.066	-0.00992	0.06	6e-05
YFR045W	YFR045W		0.96319	0.079	1.04314	0.008	-0.0779	0.079	0.00015
YFR046C	CNN1		1.03918	0.098	1.08804	0.035	-0.05246	0.098	0.00023
YFR047C	BNA6		1.03258	0.092	0.9909	0.01	0.04785	0.092	0.00019
YFR048W	RMD8		1.0116	0.043	1.04836	0.017	-0.03527	0.043	2e-05
YFR049W	YMR31		0.91838	0.042	1.02497	0.062	-0.11972	0.042	0.00071	status=JK
YFR053C	HXK1		0.95015	0.094	0.99031	0.029	-0.04401	0.094	0.00026
YFR054C	YFR054C		1.00762	0.025	1.01377	0.078	0.00612	0.025	0.00021	status=JK
YFR055W	IRC7		1.07294	0.023	1.02388	0.053	0.06345	0.023	0.00016	status=JK
YFR056C	YFR056C		1.02777	0.085	0.98329	0.045	0.03665	0.085	0.00016
YFR057W	YFR057W		1.05528	0.075	1.02095	0.063	0.03231	0.075	0.0001
YGL002W	ERP6		1.09779	0.024	1.01211	0.064	0.0929	0.024	0.00016	status=JK
YGL004C	RPN14		1.04641	0.054	1.02482	0.085	0.05049	0.054	4e-05
YGL005C	COG7		1.06908	0.054	0.99824	0.078	0.07085	0.053	3e-05
YGL006W	PMC1		1.00047	0.061	1.01783	0.047	-0.01257	0.061	6e-05
YGL007W	YGL007W		0.75541	0.061	0.7813	0.042	-0.03332	0.061	0.00014
YGL009C	LEU1		0.93151	0.192	0.9631	0.126	-0.04312	0.192	0.00233
YGL010W	YGL010W		1.06248	0.056	1.10095	0.088	-0.03563	0.056	4e-05
YGL013C	PDR1		1.02765	0.02	0.96838	0.021	0.05844	0.02	0
YGL014W	PUF4		1.02045	0.003	1.03277	0.058	-0.03012	0.003	0	status=JK
YGL015C	YGL015C		1.08842	0.038	1.08934	0.037	-0.00539	0.038	1e-05
YGL016W	KAP122		0.76424	0.004	0.73813	0.081	0.01367	0.004	1e-05	status=JK
YGL017W	ATE1		1.0201	0.038	1.03333	0.01	-0.01535	0.038	0.00047	status=JK
YGL019W	CKB1		0.88748	0.071	0.94071	0.101	-0.0494	0.07	0.00014
YGL020C	GET1		0.93092	0.052	0.99701	0.051	-0.05618	0.052	5e-05
YGL021W	ALK1		1.11779	0.096	1.08762	0.029	0.0451	0.096	0.00017
YGL023C	PIB2		0.78352	0.164	0.8694	0.065	-0.07062	0.164	0.00243
YGL024W	YGL024W		0.62444	0.037	0.72228	0.01	-0.10041	0.037	6e-05
YGL026C	TRP5		0	0	0	0	0	0	#NUM!
YGL027C	CWH41		0.99481	0.028	1.03671	0.059	-0.05461	0.028	1e-05
YGL028C	SCW11		1.0456	0.038	1.09693	0.029	-0.05233	0.038	1e-05
YGL029W	CGR1		0.82068	0.176	0.95495	0.044	-0.14281	0.176	0.00263
YGL031C	RPL24A		0.71133	0.078	0.71653	0.084	-0.00313	0.078	0.00036
YGL032C	AGA2		1.17209	0.011	1.09156	0.073	0.06168	0.011	3e-05	status=JK
YGL034C	YGL034C		1.0151	0.102	1.07677	0.076	-0.06092	0.102	0.00028
YGL035C	MIG1		1.12564	0.026	0.97524	0.024	0.15514	0.026	0.00018	status=JK
YGL036W	YGL036W		0.85516	0.03	0.91973	0.023	-0.06741	0.03	1e-05
YGL037C	PNC1		0.97452	0.035	1.05885	0.046	-0.08805	0.035	1e-05
YGL039W	YGL039W		0.98991	0.105	1.03447	0.131	-0.01696	0.105	0.00033
YGL041C	YGL041C		1.02413	0.048	0.99005	0.081	0.02125	0.048	3e-05
YGL042C	YGL042C		0.9507	0.103	0.97431	0.005	-0.02236	0.103	0.00035
YGL043W	DST1		0.87277	0.042	0.9073	0.046	-0.03694	0.042	3e-05
YGL045W	RIM8		0	0	0	0	0	0	#NUM!	status=JK
YGL046W	YGL046W		0.8655	0.063	0.77233	0.049	0.08328	0.063	0.00011
YGL049C	TIF4632		1.12121	0.038	1.03456	0.003	0.0861	0.038	1e-05
YGL050W	TYW3		1.09419	0.065	1.05389	0.008	0.03983	0.065	6e-05
YGL051W	MST27		0.98605	0.02	0.94803	0.142	-0.0018	0.02	0.00013	status=JK
YGL053W	PRM8		1.04032	0.09	1.04447	0.097	0.01738	0.09	0.00018
YGL054C	ERV14		0.93862	0.066	0.974	0.125	-0.04437	0.066	0.0001
YGL056C	SDS23		1.00574	0.072	1.05951	0.058	-0.07445	0.072	0.0001
YGL057C	GEP7		0.74491	0.056	0.69158	0.156	0.02402	0.056	0.00012
YGL058W	RAD6		1.03782	0.059	1.0925	0.023	-0.05802	0.059	5e-05
YGL059W	PKP2		1.0753	0.082	1.06552	0.043	0.00876	0.082	0.00012
YGL060W	YBP2		1.02288	0.226	1.00255	0.08	0.03756	0.225	0.00284
YGL062W	PYC1		1.06532	0.13	1.08674	0.105	-0.03796	0.13	0.00049
YGL063W	PUS2		0.99117	0.043	0.94189	0.127	0.05735	0.042	2e-05
YGL066W	SGF73		0.69788	0.108	0.829	0.036	-0.1381	0.108	0.001
YGL067W	NPY1		1.02588	0.016	1.03807	0.004	-0.01212	0.015	8e-05	status=JK
YGL071W	AFT1		0.89776	0.06	0.94342	0.089	-0.0202	0.06	8e-05
YGL077C	HNM1		0.98724	0.052	0.98087	0.026	0.00723	0.052	4e-05
YGL078C	DBP3		0.78434	0.004	0.80757	0.025	-0.02718	0.004	1e-05	status=JK
YGL079W	KXD1		0.99688	0.039	0.9801	0.009	0.01246	0.039	2e-05
YGL080W	FMP37		0.87693	0.002	0.81381	0.021	0.07249	0.002	0	status=JK
YGL081W	YGL081W		1.05026	0.08	1.09409	0.052	-0.03055	0.08	0.00012
YGL082W	YGL082W		1.07039	0.057	1.01992	0.015	0.05192	0.057	4e-05
YGL083W	SCY1		1.0121	0.023	1.0507	0.006	-0.03418	0.023	0
YGL084C	GUP1		0.81443	0.082	0.8829	0.007	-0.06538	0.082	0.00028
YGL085W	LCL3		1.00049	0.123	0.98666	0.11	0.0059	0.123	0.00051
YGL086W	MAD1		1.02421	0.041	1.00475	0.014	0.02072	0.041	2e-05
YGL087C	MMS2		0.95639	0.026	0.93429	0.013	0.0257	0.026	1e-05
YGL089C	MF(ALPHA)2		1.04113	0.018	1.05539	0.018	-0.0163	0.018	0
YGL090W	LIF1		1.05818	0.045	0.99952	0.031	0.06294	0.045	2e-05
YGL094C	PAN2		1.02989	0.053	1.0115	0.021	0.0202	0.053	4e-05
YGL096W	TOS8		0.95386	0.039	0.96084	0.029	-0.00166	0.039	2e-05
YGL101W	YGL101W		1.01852	0.014	1.02748	0.084	0.00679	0.014	6e-05	status=JK
YGL104C	VPS73		1.01653	0.072	1.03348	0.008	-0.0202	0.072	0.0001
YGL105W	ARC1		0	0	0.06218	0.081	-0.03925	0	#NUM!	status=JK
YGL108C	YGL108C		1.02147	0.011	1.05657	0.05	-0.03222	0.011	4e-05	status=JK
YGL109W	YGL109W		1.04968	0.06	1.07265	0.044	-0.02495	0.06	5e-05
YGL110C	CUE3		1.03462	0.026	0.99688	0.005	0.03953	0.026	0
YGL114W	YGL114W		0.99081	0.039	1.01422	0.056	-0.00869	0.039	2e-05
YGL115W	SNF4		0.77215	0.094	0.83939	0.033	-0.07328	0.094	0.00049
YGL117W	YGL117W		1.06818	0.035	1.1028	0.057	-0.03252	0.035	1e-05
YGL118C	YGL118C		1.05752	0.061	1.04274	0.033	0.01727	0.061	5e-05
YGL121C	GPG1		1.04739	0.066	1.07995	0.011	-0.03251	0.066	7e-05
YGL124C	MON1		0.87339	0.094	0.90623	0.061	-0.02951	0.093	0.00034
YGL125W	MET13		1.04387	0.063	1.03922	0.014	0.00884	0.063	6e-05
YGL126W	SCS3		0.9375	0.063	0.9397	0.028	-0.00294	0.063	8e-05
YGL127C	SOH1		0.7018	0.041	0.71148	0.029	-0.01614	0.041	6e-05
YGL131C	SNT2		1.00618	0.01	0.98111	0.03	0.03176	0.01	3e-05	status=JK
YGL132W	YGL132W		1.02066	0.024	0.93102	0.177	0.06288	0.024	0
YGL133W	ITC1		0.97666	0.04	0.94833	0.133	0.00195	0.04	0.00056	status=JK
YGL136C	MRM2		0.14276	0.075	0.35015	0.211	-0.14784	0.075	0.08139	status=JK
YGL138C	YGL138C		1.03731	0.034	1.10984	0.013	-0.06965	0.034	1e-05
YGL139W	FLC3		0.96881	0.04	1.01589	0.028	-0.03341	0.04	2e-05
YGL140C	YGL140C		0.97015	0.069	1.02507	0.052	-0.06708	0.069	0.0001
YGL141W	HUL5		1.02208	0.043	1.01381	0.044	0.0099	0.043	2e-05
YGL144C	ROG1		0.97358	0.091	1.10171	0.01	-0.12613	0.09	0.00022
YGL146C	RRT6		0.97438	0.009	1.02764	0.051	-0.05224	0.009	3e-05	status=JK
YGL147C	RPL9A		0.80973	0.03	0.95776	0.021	-0.15037	0.03	1e-05
YGL148W	ARO2		0.92761	0.036	0.83283	0.008	0.09994	0.036	2e-05
YGL149W	YGL149W		0.83164	0.069	0.93925	0.04	-0.11389	0.069	0.00015
YGL151W	NUT1		0.82168	0.057	0.84258	0.097	-0.03482	0.057	9e-05
YGL152C	YGL152C		1.01934	0.061	1.02846	0.044	-0.00124	0.061	6e-05
YGL153W	PEX14		0.99846	0.016	0.92479	0.035	0.07323	0.016	0
YGL154C	LYS5		0.53473	0.027	0.63147	0.027	-0.09195	0.027	4e-05
YGL156W	AMS1		1.04729	0.052	1.04002	0.04	0.01176	0.052	3e-05
YGL157W	ARI1		1.02747	0.059	1.05249	0.005	-0.023	0.059	5e-05
YGL158W	RCK1		1.10838	0.033	1.00355	0.062	0.0966	0.033	1e-05
YGL159W	YGL159W		0.98207	0.02	1.01639	0.099	-0.04518	0.02	0.00014	status=JK
YGL160W	AIM14		1.01534	0.12	0.98836	0.028	0.02855	0.119	0.00044
YGL161C	YIP5		1.01811	0.095	1.02896	0.051	-0.01711	0.095	0.00023
YGL162W	SUT1		1.08012	0.055	1.04951	0.025	0.02586	0.055	4e-05
YGL163C	RAD54		0.97327	0.062	0.97185	0.018	0.01262	0.061	7e-05
YGL164C	YRB30		1.06945	0.032	1.15468	0.02	-0.07463	0.032	1e-05
YGL165C	YGL165C		1.10527	0.002	1.13795	0.005	-0.02898	0.002	0	status=JK
YGL166W	CUP2		1.11678	0.023	1.1257	0.009	-0.01099	0.023	0
YGL167C	PMR1		0.75597	0.013	0.80931	0.016	-0.05642	0.013	9e-05	status=JK
YGL168W	HUR1		0.49091	0.097	0.71895	0.013	-0.22038	0.097	0.00206
YGL170C	SPO74		1.03849	0.087	1.00275	0.065	0.02834	0.086	0.00016
YGL173C	XRN1		0.52861	0.067	0.59812	0.057	-0.07838	0.067	0.00056
YGL174W	BUD13		0.77484	0.072	0.73673	0.033	0.0231	0.072	0.00022
YGL175C	SAE2		0.85017	0.031	0.88605	0.079	-0.02163	0.031	1e-05
YGL176C	YGL176C		1.18728	0.04	1.13372	0.044	0.05668	0.04	1e-05
YGL177W	YGL177W		1.26156	0.014	1.18596	0.033	0.06656	0.014	4e-05	status=JK
YGL179C	TOS3		1.19949	0.07	1.14713	0.107	0.00987	0.069	5e-05
YGL180W	ATG1		0.80231	0.141	0.83918	0.029	-0.02363	0.141	0.00145
YGL181W	GTS1		0.9835	0.06	0.94485	0.106	0.01347	0.06	6e-05
YGL194C	HOS2		0.71144	0.011	0.62434	0.055	0.09487	0.011	8e-05	status=JK
YGL195W	GCN1		0.91683	0.027	0.90477	0.07	0.01879	0.027	1e-05
YGL196W	DSD1		1.01877	0.07	1.07412	0.084	-0.04749	0.07	9e-05
YGL197W	MDS3		0.85734	0.079	0.89527	0.024	-0.03298	0.078	0.00021
YGL198W	YIP4		1.05574	0.088	1.1522	0.023	-0.0963	0.088	0.00016
YGL199C	YGL199C		1.07831	0.021	0.99489	0.037	0.06691	0.021	0.00012	status=JK
YGL202W	ARO8		0.91828	0.113	1.01245	0.05	-0.08273	0.112	0.0005
YGL203C	KEX1		0.81912	0.056	0.98456	0.042	-0.14029	0.056	0.00154	status=JK
YGL205W	POX1		0.99998	0.021	0.99071	0.059	-0.00771	0.021	0
YGL208W	SIP2		1.01778	0.042	1.05776	0.037	-0.03867	0.042	2e-05
YGL209W	MIG2		1.00915	0.021	1.04821	0.024	-0.03967	0.021	0
YGL210W	YPT32		1.08858	0.054	1.01274	0.029	0.07254	0.054	3e-05
YGL211W	NCS6		0.95991	0.015	0.95446	0.018	0.00939	0.015	8e-05	status=JK
YGL212W	VAM7		0.8084	0.008	0.82162	0.025	-0.01206	0.008	4e-05	status=JK
YGL213C	SKI8		0.99632	0.027	0.97734	0.032	0.02609	0.027	1e-05
YGL214W	YGL214W		0.17389	0.007	0.38061	0.028	-0.20264	0.007	0.00056	status=JK
YGL215W	CLG1		0.97415	0.014	0.92559	0.023	0.05052	0.014	7e-05	status=JK
YGL216W	KIP3		1.0002	0.139	1.00781	0.08	-0.02673	0.139	0.00073
YGL217C	YGL217C		0.95324	0.086	0.97811	0.035	-0.0329	0.086	0.0002
YGL218W	YGL218W		0.72576	0.077	0.66823	0.1	0.05625	0.077	0.00033
YGL219C	MDM34		0.82219	0.016	0.79662	0.035	0.02896	0.016	0.00013	status=JK
YGL221C	NIF3		0.98751	0.025	0.97995	0.003	0.00935	0.025	0
YGL222C	EDC1		0.98994	0.032	1.08028	0.004	-0.08685	0.032	1e-05
YGL224C	SDT1		1.0299	0.07	1.07497	0.026	-0.0366	0.07	8e-05
YGL226C-A	OST5		1.03564	0.041	1.07023	0.034	-0.02587	0.041	2e-05
YGL226W	MTC3		0.87107	0.02	0.81493	0.064	0.0682	0.02	0
YGL227W	VID30		1.06805	0.012	1.01797	0.045	0.04085	0.012	4e-05	status=JK
YGL228W	SHE10		0.9761	0.02	1.0634	0.027	-0.08831	0.02	0
YGL229C	SAP4		1.01405	0.062	1.05017	0.081	-0.03365	0.062	6e-05
YGL230C	YGL230C		0.97101	0.144	1.00518	0.009	-0.03544	0.144	0.00088
YGL231C	EMC4		1.09204	0.069	1.04773	0.007	0.04252	0.069	7e-05
YGL232W	TAN1		1.13273	0.035	1.09348	0.047	0.05233	0.035	1e-05
YGL234W	ADE5		1.08769	0.022	1.02887	0.029	0.06385	0.022	0
YGL235W	YGL235W		0.82952	0.077	0.80577	0.019	0.01613	0.077	0.00022
YGL236C	MTO1		0.83844	0.108	0.79401	0.066	0.0354	0.108	0.00058
YGL237C	HAP2		0.77832	0.007	0.79657	0.068	-0.01744	0.007	3e-05	status=JK
YGL241W	KAP114		1.04797	0.041	1.04324	0.034	0.00332	0.041	2e-05
YGL242C	YGL242C		0.94784	0.022	1.02977	0.018	-0.07947	0.021	0.00017	status=JK
YGL243W	TAD1		1.08941	0.022	1.02188	0.025	0.0657	0.022	0.00014	status=JK
YGL244W	RTF1		0.65189	0.021	0.71043	0.061	-0.07229	0.021	1e-05
YGL248W	PDE1		1.04926	0.024	1.02116	0.047	0.02304	0.024	0
YGL249W	ZIP2		1.00741	0.06	1.02361	0.024	-0.01232	0.06	6e-05
YGL250W	RMR1		1.0556	0.03	1.0256	0.012	0.03562	0.03	1e-05
YGL251C	HFM1		1.04363	0.085	1.09958	0.069	-0.0544	0.084	0.00015
YGL252C	RTG2		0.64816	0.038	0.62429	0.049	0.0222	0.038	5e-05
YGL253W	HXK2		0.84702	0.034	0.92252	0.058	-0.07407	0.034	2e-05
YGL254W	FZF1		1.03376	0.121	1.02734	0.066	0.03243	0.121	0.00044
YGL255W	ZRT1		0.94662	0.105	0.91375	0.038	0.04209	0.105	0.00037
YGL256W	ADH4		1.01516	0.083	1.0736	0.041	-0.06727	0.082	0.00015
YGL257C	MNT2		1.06857	0.006	1.06227	0.062	-0.00559	0.006	1e-05	status=JK
YGL258W	VEL1		1.08622	0.051	1.02739	0.031	0.05723	0.051	0.00075	status=JK
YGL259W	YPS5		1.03943	0.031	1.08108	0.032	-0.04435	0.031	1e-05
YGL260W	YGL260W		1.02457	0.034	0.99239	0.025	0.03608	0.034	1e-05
YGL261C	PAU11		1.0537	0.027	0.97844	0.05	0.08565	0.027	0
YGL262W	YGL262W		0.98182	0.087	0.99213	0.059	-0.00788	0.087	0.00019
YGL263W	COS12		0.993	0.056	1.00368	0.049	-0.00278	0.056	5e-05
YGR001C	YGR001C		0.88165	0.249	0.95441	0.064	-0.08049	0.248	0.00579
YGR003W	CUL3		1.05053	0.076	1.04203	0.024	0.00448	0.075	0.0001
YGR004W	PEX31		1.0349	0.029	1.01722	0.014	0.02072	0.029	1e-05
YGR007W	ECT1		0.99474	0.03	1.01919	0.012	-0.02806	0.03	1e-05
YGR008C	STF2		1.05758	0.021	1.02067	0.036	0.03367	0.021	0.00013	status=JK
YGR010W	NMA2		1.06145	0.057	1.00013	0.023	0.04884	0.057	4e-05
YGR011W	YGR011W		1.00111	0.08	0.99319	0.036	0.01737	0.08	0.00014
YGR012W	YGR012W		1.00903	0.022	1.07177	0.069	-0.07893	0.022	0
YGR014W	MSB2		1.00205	0.022	1.01524	0.054	-0.00543	0.022	0
YGR015C	YGR015C		0.97955	0.1	1.00656	0.06	-0.02907	0.1	0.00029
YGR016W	YGR016W		1.05585	0.047	1.04653	0.031	0.00907	0.047	2e-05
YGR017W	YGR017W		0.93851	0.019	0.89106	0.05	0.03744	0.019	0
YGR018C	YGR018C		1.00406	0.033	0.95579	0.006	0.05214	0.033	1e-05
YGR019W	UGA1		1.08447	0.083	1.07523	0.017	0.01211	0.083	0.00012
YGR021W	YGR021W		1.00419	0.095	1.0147	0.074	-0.02535	0.095	0.00023
YGR022C	YGR022C		1.00915	0.029	0.95759	0.041	0.05092	0.029	1e-05
YGR023W	MTL1		1.08419	0.074	1.09642	0.037	-0.00371	0.074	9e-05
YGR025W	YGR025W		1.08565	0.018	1.06832	0.082	0.0137	0.017	0
YGR026W	YGR026W		1.01284	0.018	0.99424	0.021	0.02423	0.018	0
YGR027C	RPS25A		0.82771	0.053	0.77585	0.065	0.03829	0.053	7e-05
YGR028W	MSP1		1.0143	0.02	0.95273	0.045	0.05055	0.019	0.00012	status=JK
YGR031W	IMO32		1.06071	0.01	0.97839	0.022	0.07796	0.01	3e-05	status=JK
YGR032W	GSC2		1.0889	0.03	0.98302	0.008	0.10609	0.03	0.00025	status=JK
YGR033C	TIM21		0.98376	0.075	1.07317	0.078	-0.07304	0.075	0.00012
YGR034W	RPL26B		1.05866	0.053	1.05783	0.022	0.01043	0.053	0.00084	status=JK
YGR035C	YGR035C		0.96847	0.045	0.99047	0.012	-0.01485	0.045	3e-05
YGR037C	ACB1		0.88609	0.043	0.87934	0.004	0.00967	0.043	3e-05
YGR038W	ORM1		0.94261	0.041	0.90315	0.08	0.05999	0.041	2e-05
YGR039W	YGR039W		0.99532	0.069	1.02128	0.042	-0.01034	0.069	9e-05
YGR040W	KSS1		0.96087	0.085	1.00919	0.049	-0.04309	0.085	0.00019
YGR041W	BUD9		0.99628	0.024	1.01422	0.08	-0.02142	0.024	0.00019	status=JK
YGR042W	YGR042W		1.03965	0.049	1.07651	0.035	-0.03327	0.048	3e-05
YGR043C	NQM1		1.0591	0.066	1.08638	0.006	-0.02764	0.065	7e-05
YGR044C	RME1		1.06851	0.015	1.09284	0.047	-0.01122	0.015	7e-05	status=JK
YGR045C	YGR045C		1.12374	0.035	1.04459	0.026	0.08106	0.035	1e-05
YGR049W	SCM4		0.91453	0.105	0.92971	0.116	0.00085	0.104	0.00041
YGR050C	YGR050C		1.0822	0.018	1.0442	0.009	0.03806	0.018	0
YGR051C	YGR051C		1.20967	0.018	1.14536	0.011	0.06862	0.018	7e-05	status=JK
YGR052W	FMP48		1.14998	0.056	1.05873	0.057	0.0954	0.056	0.0008	status=JK
YGR053C	YGR053C		1.13316	0.019	1.00658	0.056	0.12259	0.019	9e-05	status=JK
YGR054W	YGR054W		1.09328	0.02	1.04661	0.053	0.0518	0.02	0
YGR055W	MUP1		1.08481	0.049	1.0322	0.066	0.04027	0.049	2e-05
YGR058W	PEF1		1.0055	0.022	0.98773	0.021	0.02245	0.022	0.00016	status=JK
YGR059W	SPR3		0.99297	0.015	0.93257	0.068	0.06654	0.015	7e-05	status=JK
YGR061C	ADE6		0.9158	0.095	0.87604	0.209	0.00277	0.095	0.00355	status=JK
YGR066C	YGR066C		1.03196	0.031	1.06259	0.043	-0.03071	0.031	1e-05
YGR067C	YGR067C		1.00844	0.043	1.04423	0.002	-0.03662	0.043	2e-05
YGR068C	ART5		0.99324	0.061	1.01568	0.037	-0.01613	0.061	6e-05
YGR069W	YGR069W		1.02178	0.034	1.02773	0.06	0.01152	0.034	1e-05
YGR070W	ROM1		1.08243	0.053	1.0322	0.041	0.05438	0.052	3e-05
YGR071C	ENV11		1.01744	0.016	0.95702	0.033	0.05593	0.016	9e-05	status=JK
YGR072W	UPF3		0.95487	0.016	0.91411	0.071	0.05328	0.016	0
YGR077C	PEX8		0.88879	0.036	0.81749	0.036	0.07773	0.036	2e-05
YGR078C	PAC10		0.70584	0.109	0.71935	0.157	-0.03084	0.109	0.00099
YGR079W	YGR079W		0.99717	0.091	1.04058	0.059	-0.05974	0.091	0.00021
YGR080W	TWF1		1.07167	0.082	1.07445	0.006	-0.00046	0.082	0.00012
YGR081C	SLX9		0.68138	0.044	0.7349	0.01	-0.05804	0.044	7e-05
YGR084C	MRP13		0.99913	0.024	0.98456	0.021	0.02729	0.024	0
YGR085C	RPL11B		0.85341	0.005	0.85267	0.011	0.0029	0.005	1e-05	status=JK
YGR086C	PIL1		1.00641	0.032	1.03729	0.007	-0.02625	0.032	1e-05
YGR087C	PDC6		1.05465	0.066	1.02476	0.027	0.02971	0.066	7e-05
YGR088W	CTT1		1.05009	0.08	1.05641	0.017	-0.01391	0.08	0.00012
YGR089W	NNF2		1.11127	0.076	1.02037	0.074	0.09762	0.075	9e-05
YGR092W	DBF2		0.70263	0.017	0.60196	0.021	0.09148	0.017	0.00019	status=JK
YGR093W	YGR093W		1.04107	0.088	0.968	0.085	0.086	0.088	0.00017
YGR096W	TPC1		0.94228	0.051	0.97579	0.066	-0.023	0.05	4e-05
YGR097W	ASK10		0.67325	0.059	0.7789	0.098	-0.08872	0.059	0.00018
YGR100W	MDR1		1.02171	0.007	1.03241	0.054	-0.01328	0.007	2e-05	status=JK
YGR101W	PCP1		0.76666	0.018	0.78625	0.037	-0.02415	0.018	0
YGR105W	VMA21		0.61902	0.024	0.59948	0.004	0.01938	0.024	0.00049	status=JK
YGR106C	VOA1		1.02974	0.058	0.99691	0.076	0.02119	0.057	5e-05
YGR107W	YGR107W		1.06073	0.011	1.00131	0.021	0.06081	0.011	4e-05	status=JK
YGR108W	CLB1		1.07231	0.068	1.05369	0.014	0.0169	0.068	7e-05
YGR109C	CLB6		1.00336	0.056	0.97704	0.039	0.03333	0.056	5e-05
YGR110W	CLD1		1.05952	0.043	1.05645	0.047	0.00798	0.042	2e-05
YGR111W	YGR111W		0.90901	0.082	1.02686	0.038	-0.12146	0.082	0.0002
YGR117C	YGR117C		1.05751	0.026	1.01615	0.031	0.03856	0.026	0.0002	status=JK
YGR118W	RPS23A		0.793	0.067	0.81004	0.048	-0.03163	0.067	0.00017
YGR121C	MEP1		0.98272	0.063	0.97872	0.026	0.00432	0.063	7e-05
YGR122C-A	YGR122C-A		1.0854	0.024	1.10808	0.01	-0.01846	0.024	0.00017	status=JK
YGR122W	YGR122W		0.84593	0.098	0.90553	0.034	-0.06052	0.097	0.00042
YGR123C	PPT1		1.07924	0.07	1.08011	0.057	0.01083	0.07	7e-05
YGR124W	ASN2		0.99392	0.117	0.95505	0.006	0.03749	0.117	0.00044
YGR125W	YGR125W		0.95573	0.072	0.9122	0.08	0.02594	0.072	0.00012
YGR126W	YGR126W		0.98055	0.088	1.04177	0.031	-0.05889	0.088	0.0002
YGR127W	YGR127W		1.00421	0.045	1.0777	0.009	-0.07003	0.045	2e-05
YGR129W	SYF2		0.97311	0.033	0.94449	0.054	0.03319	0.033	1e-05
YGR130C	YGR130C		0.96839	0.058	1.02591	0.006	-0.05297	0.058	6e-05
YGR131W	FHN1		0.99604	0.121	1.0817	0.08	-0.09358	0.121	0.00049
YGR132C	PHB1		0.95078	0.042	0.9097	0.003	0.04112	0.042	2e-05
YGR133W	PEX4		0.983	0.045	0.98122	0.02	0.00331	0.045	3e-05
YGR134W	CAF130		1.022	0.028	1.00667	0.012	0.01838	0.027	1e-05
YGR135W	PRE9		0.88929	0.041	0.93828	0.008	-0.04833	0.041	3e-05
YGR136W	LSB1		1.00778	0.065	0.99357	0.007	0.01638	0.065	7e-05
YGR137W	YGR137W		1.02831	0.105	1.01372	0.014	0.01209	0.105	0.00029
YGR138C	TPO2		0.95674	0.081	1.03255	0.079	-0.09116	0.081	0.00017
YGR139W	YGR139W		1.09028	0.078	1.07329	0.112	0.03263	0.077	0.0001
YGR141W	VPS62		0.96414	0.049	0.98097	0.035	-0.01375	0.049	4e-05
YGR142W	BTN2		0.95983	0.078	0.92667	0.039	0.02155	0.078	0.00015
YGR143W	SKN1		1.04502	0.05	1.05812	0.041	-0.00419	0.049	3e-05
YGR144W	THI4		1.02537	0.044	1.08185	0.054	-0.05767	0.043	2e-05
YGR146C	ECL1		1.09078	0.021	1.11595	0.033	-0.03155	0.021	0
YGR148C	RPL24B		0.77014	0.005	0.81182	0.031	-0.04315	0.005	1e-05	status=JK
YGR149W	YGR149W		1.04243	0.037	1.05465	0.043	-0.0134	0.037	1e-05
YGR151C	YGR151C		1.15759	0.023	1.14293	0.015	0.01366	0.023	0.00014	status=JK
YGR152C	RSR1		0.94753	0.067	0.95782	0.16	-0.01331	0.066	0.0001
YGR153W	YGR153W		0.92043	0.024	0.90933	0.014	0.01226	0.024	1e-05
YGR154C	GTO1		1.03561	0.039	1.01522	0.009	0.01942	0.039	1e-05
YGR157W	CHO2		0.59638	0.039	0.4937	0.03	0.10774	0.039	8e-05
YGR161C	RTS3		0.96971	0.128	0.98914	0.09	-0.03987	0.128	0.00063
YGR163W	GTR2		0.83458	0.059	0.72123	0.045	0.13246	0.059	0.0001
YGR164W	YGR164W		1.00972	0.068	1.02687	0.118	-0.05239	0.068	8e-05
YGR166W	TRS65		1.01122	0.038	0.95658	0.092	0.05283	0.038	0.00046	status=JK
YGR168C	YGR168C		0.96978	0.069	0.93282	0.073	0.02916	0.069	0.0001
YGR169C	PUS6		1.02687	0.039	1.01641	0.003	0.01024	0.039	1e-05
YGR170W	PSD2		1.02753	0.042	1.03056	0.024	-0.00361	0.042	2e-05
YGR173W	RBG2		1.01768	0.087	0.99976	0.039	0.02059	0.087	0.00017
YGR174C	CBP4		0.86285	0.035	0.8292	0.057	0.02107	0.035	2e-05
YGR176W	YGR176W		1.08016	0.039	1.08836	0.018	-0.01183	0.039	1e-05
YGR177C	ATF2		1.06934	0.069	1.05953	0.04	0.00802	0.069	7e-05
YGR178C	PBP1		0.99711	0.035	1.03789	0.023	-0.03851	0.035	1e-05
YGR181W	TIM13		0.94038	0.149	1.02662	0.158	-0.08905	0.148	0.00107
YGR182C	YGR182C		0.92827	0.052	0.85777	0.106	0.07351	0.052	5e-05
YGR183C	QCR9		0.87584	0.045	0.80907	0.108	0.04931	0.045	4e-05
YGR184C	UBR1		1.00955	0.014	0.98833	0.047	0.03043	0.014	0
YGR187C	HGH1		0.97293	0.039	0.94869	0.054	0.03359	0.039	2e-05
YGR188C	BUB1		0.69334	0.032	0.64547	0.006	0.04696	0.032	3e-05
YGR189C	CRH1		1.06574	0.002	1.07432	0.032	-0.00309	0.002	0
YGR192C	TDH3		0.97836	0.02	1.00774	0.054	-0.0403	0.02	0
YGR193C	PDX1		0.96542	0.02	0.96799	0.014	-0.00406	0.02	0.00015	status=JK
YGR194C	XKS1		1.0339	0.042	1.0164	0.015	0.01606	0.042	2e-05
YGR196C	FYV8		0.99322	0.049	1.02382	0.032	-0.02593	0.049	3e-05
YGR197C	SNG1		0.99604	0.011	1.11281	0.102	-0.12884	0.011	4e-05	status=JK
YGR199W	PMT6		1.17354	0.019	1.15389	0.09	0.00594	0.019	9e-05	status=JK
YGR200C	ELP2		0.81912	0.073	0.86589	0.007	-0.04792	0.073	0.00019
YGR201C	YGR201C		1.06825	0.018	1.1194	0.034	-0.04606	0.018	9e-05	status=JK
YGR202C	PCT1		1.10477	0.035	1.088	0.029	0.02395	0.035	0.00034	status=JK
YGR203W	YCH1		1.01309	0.024	0.99022	0.029	0.01541	0.023	0
YGR205W	TDA10		1.0786	0.011	1.03799	0.008	0.03863	0.011	4e-05	status=JK
YGR206W	MVB12		0.89205	0.011	0.92356	0.045	-0.03895	0.011	5e-05	status=JK
YGR207C	CIR1		1.06879	0.09	1.094	0.044	-0.03516	0.09	0.00016
YGR208W	SER2		1.14009	0.025	1.07199	0.04	0.06335	0.025	0
YGR209C	TRX2		1.02937	0.006	1.01801	0.012	0.01566	0.006	1e-05	status=JK
YGR210C	YGR210C		0.95564	0.042	1.11994	0.096	-0.16984	0.042	0.00065	status=JK
YGR212W	SLI1		1.04645	0.1	0.98066	0.041	0.08293	0.1	0.00024
YGR213C	RTA1		1.03425	0.034	1.06739	0.053	-0.0271	0.034	1e-05
YGR214W	RPS0A		0.85006	0.009	0.89513	0.007	-0.043	0.009	3e-05	status=JK
YGR217W	CCH1		1.04295	0.058	1.00956	0.059	0.0179	0.058	5e-05
YGR221C	TOS2		1.01594	0.021	0.97101	0.032	0.04379	0.021	0.00014	status=JK
YGR223C	HSV2		0.9439	0.011	0.87881	0.006	0.06558	0.011	4e-05	status=JK
YGR224W	AZR1		1.03642	0.061	1.09273	0.014	-0.05926	0.061	6e-05
YGR225W	AMA1		0.99414	0.017	0.9956	0.011	-0.00066	0.017	9e-05	status=JK
YGR226C	YGR226C		0.99535	0.034	0.99732	0.044	-0.01425	0.034	1e-05
YGR227W	DIE2		1.0082	0.061	1.05304	0.012	-0.05022	0.061	6e-05
YGR228W	YGR228W		0.89496	0.13	1.01869	0.117	-0.12494	0.13	0.00083
YGR229C	SMI1		0.93297	0.049	0.91458	0.069	0.02837	0.049	0.00092	status=JK
YGR230W	BNS1		1.10771	0.039	1.15952	0.036	-0.04647	0.039	1e-05
YGR231C	PHB2		0.72347	0.032	0.68714	0.034	0.04479	0.032	2e-05
YGR232W	NAS6		1.04905	0.05	1.04781	0.039	0.00931	0.05	3e-05
YGR233C	PHO81		0.97301	0.037	1.00377	0.044	-0.03161	0.037	2e-05
YGR234W	YHB1		1.06801	0.049	1.11886	0.082	-0.03333	0.049	3e-05
YGR235C	MOS2		1.03907	0.075	1.11035	0.026	-0.0579	0.075	0.0001
YGR236C	SPG1		0.94838	0.113	1.00702	0.026	-0.05993	0.112	0.00046
YGR237C	YGR237C		1.10125	0.014	0.99327	0.094	0.1018	0.014	5e-05	status=JK
YGR238C	KEL2		0.95696	0.074	1.00346	0.006	-0.04778	0.074	0.00013
YGR239C	PEX21		0.99366	0.028	0.97056	0.027	0.02939	0.028	1e-05
YGR241C	YAP1802		0.97846	0.03	1.02203	0.012	-0.04509	0.03	1e-05
YGR242W	YGR242W		1.04714	0.03	1.02551	0.017	0.02641	0.03	1e-05
YGR243W	FMP43		1.10156	0.035	1.10233	0.006	-0.00464	0.035	1e-05
YGR244C	LSC2		1.05503	0.09	1.098	0.072	-0.04327	0.09	0.00017
YGR247W	CPD1		1.04987	0.076	1.00675	0.105	0.05588	0.076	0.0001
YGR248W	SOL4		0.96735	0.107	1.02178	0.063	-0.04472	0.107	0.00037
YGR249W	MGA1		1.09067	0.022	1.1195	0.079	-0.03486	0.022	0
YGR250C	YGR250C		1.00774	0.018	0.92027	0.055	0.08929	0.018	0
YGR254W	ENO1		1.04532	0.038	1.04441	0.013	-0.00198	0.038	1e-05
YGR255C	COQ6		0.99484	0.042	1.02564	0.004	-0.0292	0.042	2e-05
YGR256W	GND2		1.00506	0.057	1.0414	0.087	-0.0356	0.057	5e-05
YGR259C	YGR259C		0.98798	0.057	0.97863	0.014	0.0015	0.057	5e-05
YGR260W	TNA1		0.98028	0.025	0.94833	0.07	0.03978	0.025	0
YGR261C	APL6		1.08445	0.032	1.11629	0.051	-0.03045	0.032	1e-05
YGR263C	SAY1		1.10043	0.012	1.08165	0.08	0.02106	0.012	4e-05	status=JK
YGR266W	YGR266W		0.93093	0.065	0.95686	0.043	-0.01582	0.065	9e-05
YGR268C	HUA1		0.92965	0.161	0.44014	0.518	0.54907	0.161	0.00139
YGR269W	YGR269W		1.036	0.087	0.76524	0.382	0.22927	0.087	0.00016
YGR270W	YTA7		0.69362	0.064	0.82184	0.083	-0.11075	0.064	0.00022
YGR271W	SLH1		1.0383	0.044	0.90976	0.18	0.08959	0.043	2e-05
YGR272C	YGR272C		0.99274	0.1	1.02327	0.003	-0.03017	0.1	0.00028
YGR273C	YGR273C		1.05979	0.041	1.08733	0.009	-0.03031	0.041	2e-05
YGR275W	RTT102		0.87014	0.149	0.90231	0.159	-0.0354	0.149	0.00135
YGR276C	RNH70		1.0204	0.066	1.09819	0.034	-0.08596	0.066	7e-05
YGR279C	SCW4		0.85365	0.176	0.84842	0.033	0.00264	0.176	0.00233
YGR281W	YOR1		1.01655	0.062	1.08025	0.056	-0.03938	0.062	6e-05
YGR282C	BGL2		1.06362	0.047	1.08315	0.133	-0.01667	0.047	2e-05
YGR283C	YGR283C		0.90976	0.043	0.99153	0.094	-0.10531	0.043	3e-05
YGR284C	ERV29		1.06921	0.038	0.96173	0.15	0.11193	0.038	0.00042	status=JK
YGR286C	BIO2		0.95874	0.015	0.9898	0.037	-0.03007	0.015	8e-05	status=JK
YGR287C	IMA1		0.9949	0.09	0.9907	0.085	-0.00951	0.09	0.0002
YGR288W	MAL13		1.03863	0.039	0.99401	0.033	0.04496	0.039	2e-05
YGR289C	MAL11		1.02151	0.029	0.97012	0.006	0.05058	0.029	1e-05
YGR290W	YGR290W		1.11383	0.01	1.11886	0.036	-0.00267	0.01	3e-05	status=JK
YGR291C	YGR291C		1.0421	0.025	1.0888	0.051	-0.04655	0.025	0.00019	status=JK
YGR292W	MAL12		1.08391	0.045	1.03426	0.036	0.04833	0.045	2e-05
YGR295C	COS6		1.02619	0.051	0.97592	0.032	0.05476	0.051	3e-05
YHL002W	HSE1		1.01416	0.096	1.02109	0.035	-0.00372	0.096	0.00023
YHL003C	LAG1		1.07208	0.132	1.04051	0.089	0.05125	0.131	0.0005
YHL005C	YHL005C		0.83302	0.019	0.79817	0.012	0.03882	0.019	0
YHL006C	SHU1		0.99454	0.066	0.98014	0.014	0.00687	0.066	8e-05
YHL007C	STE20		0.21123	0.247	0	0	0.2108	0.247	0.18595
YHL008C	YHL008C		1.04995	0.107	1.01496	0.208	0.03687	0.107	0.00029
YHL009C	YAP3		1.08243	0.057	1.02573	0.052	0.04321	0.057	4e-05
YHL010C	ETP1		1.00909	0.021	1.01164	0.029	-0.00158	0.021	0
YHL012W	YHL012W		1.0123	0.037	1.05237	0.043	-0.02729	0.037	1e-05
YHL013C	OTU2		0.97998	0.035	0.97758	0.019	0.00805	0.035	1e-05
YHL014C	YLF2		1.117	0.017	1.06924	0.052	0.04632	0.017	8e-05	status=JK
YHL016C	DUR3		0.99082	0.109	1.01337	0.053	-0.03607	0.109	0.00036
YHL017W	YHL017W		1.02768	0.057	1.02228	0.019	0.00437	0.057	5e-05
YHL019C	APM2		1.02241	0.027	0.99667	0.016	0.02124	0.027	1e-05
YHL020C	OPI1		0.59268	0.074	0.60951	0.072	-0.01487	0.074	0.00053
YHL021C	AIM17		0.98964	0.044	0.96086	0.104	0.02591	0.044	2e-05
YHL022C	SPO11		1.09945	0.075	1.12376	0.089	-0.04595	0.074	9e-05
YHL023C	NPR3		0.86952	0.043	0.84637	0.012	0.02127	0.043	3e-05
YHL024W	RIM4		1.0584	0.025	1.05306	0.017	0.00241	0.025	0
YHL025W	SNF6		0.81614	0.008	0.87672	0.014	-0.05721	0.008	3e-05	status=JK
YHL026C	YHL026C		0.97389	0.012	0.981	0.027	-0.0036	0.012	0
YHL027W	RIM101		0.72919	0.073	0.79185	0.074	-0.06757	0.073	0.00028
YHL028W	WSC4		1.00937	0.016	1.00013	0.029	0.00317	0.016	8e-05	status=JK
YHL029C	OCA5		0.8018	0.018	0.87674	0.027	-0.07024	0.018	0.00016	status=JK
YHL030W	ECM29		1.02577	0.035	1.00442	0.019	0.02417	0.035	1e-05
YHL031C	GOS1		0.63625	0.029	0.68368	0.012	-0.04835	0.029	3e-05
YHL032C	GUT1		0.97359	0.142	1.06205	0.103	-0.09475	0.142	0.00084
YHL033C	RPL8A		0.69661	0.092	0.75495	0.115	-0.05153	0.092	0.00063
YHL034C	SBP1		0.86492	0.026	0.97168	0.037	-0.10256	0.026	0.00029	status=JK
YHL035C	VMR1		0.98887	0.029	0.99758	0.02	-0.00477	0.029	1e-05
YHL036W	MUP3		1.0847	0.022	1.02044	0.003	0.06182	0.022	0
YHL037C	YHL037C		0.97522	0.108	0.90318	0.102	0.0686	0.108	0.00037
YHL039W	EFM1		0.99784	0.057	1.01228	0.135	0.01317	0.057	5e-05
YHL040C	ARN1		1.0421	0.06	1.0172	0.042	0.0297	0.06	5e-05
YHL041W	YHL041W		1.04028	0.024	1.04316	0.02	-0.00556	0.024	0.00018	status=JK
YHL042W	YHL042W		1.06379	0.02	1.01994	0.011	0.03696	0.02	0.00012	status=JK
YHL043W	ECM34		1.04607	0.046	1.00967	0.015	0.0396	0.046	2e-05
YHL044W	YHL044W		1.06855	0.026	0.92081	0.041	0.12488	0.026	0.00019	status=JK
YHL045W	YHL045W		1.08194	0.038	1.03656	0.112	0.05598	0.038	0.00041	status=JK
YHL046C	PAU13		1.07877	0.075	1.03806	0.07	0.05961	0.075	9e-05
YHL047C	ARN2		1.06064	0.017	1.01546	0.007	0.04842	0.017	0
YHR001W-A	QCR10		1.02506	0.045	1.03158	0.016	-0.00452	0.045	2e-05
YHR003C	YHR003C		0.83863	0.082	0.92886	0.001	-0.09048	0.082	0.00026
YHR004C	NEM1		0.96405	0.02	0.95442	0.013	0.01429	0.02	0.00014	status=JK
YHR005C	GPA1		0	0	0	0	0	0	#NUM!
YHR006W	STP2		1.11122	0.038	1.021	0.04	0.08163	0.038	1e-05
YHR008C	SOD2		0.97051	0.006	0.94976	0.051	0.01804	0.006	1e-05	status=JK
YHR009C	TDA3		0.93628	0.016	0.90707	0.074	0.0447	0.016	0.0001	status=JK
YHR012W	VPS29		0.90866	0.012	0.84487	0.045	0.06305	0.012	6e-05	status=JK
YHR014W	SPO13		0.97971	0.072	0.89222	0.07	0.09699	0.071	0.00011
YHR015W	MIP6		1.0226	0.007	1.07001	0.03	-0.05163	0.007	2e-05	status=JK
YHR016C	YSC84		1.05232	0.059	1.12961	0.024	-0.0894	0.059	5e-05
YHR017W	YSC83		0.82217	0.016	0.83308	0.074	0.00615	0.016	0.00013	status=JK
YHR018C	ARG4		0.50937	0.018	0.50472	0.077	-0.0114	0.018	0.00044	status=JK
YHR021C	RPS27B		0.79362	0.026	0.82274	0.033	-0.03448	0.026	1e-05
YHR021W-A	ECM12		0.93911	0.111	0.99013	0.227	-0.05992	0.11	0.00045
YHR022C	YHR022C		0.95436	0.097	0.87984	0.162	0.10198	0.097	0.00029
YHR025W	THR1		0.5274	0.051	0.62334	0.024	-0.09365	0.051	0.00025
YHR028C	DAP2		1.00544	0.022	0.95725	0.04	0.04962	0.022	0.00017	status=JK
YHR029C	YHI9		0.96478	0.033	1.00524	0.04	-0.05071	0.033	0.00039	status=JK
YHR030C	SLT2		1.04938	0.085	1.04564	0.036	-0.0035	0.085	0.00015
YHR031C	RRM3		1.06025	0.059	1.0771	0.119	-0.01549	0.059	5e-05
YHR032W	ERC1		1.1084	0.017	1.10613	0.033	0.00524	0.017	0
YHR033W	YHR033W		0.91494	0.123	0.99062	0.03	-0.08553	0.123	0.00066
YHR034C	PIH1		0.8923	0.02	1.01057	0.072	-0.12523	0.02	0.00016	status=JK
YHR035W	YHR035W		0.96168	0.082	0.96702	0.206	0.01647	0.082	0.00017
YHR037W	PUT2		0.95094	0.088	0.88416	0.256	0.06852	0.088	0.00022
YHR039C	MSC7		0.93696	0.043	1.02662	0.113	-0.09541	0.043	3e-05
YHR041C	SRB2		0.40732	0.057	0.53356	0.03	-0.1395	0.057	0.00076
YHR043C	DOG2		1.06453	0.045	1.0717	0.154	-0.04887	0.045	2e-05
YHR044C	DOG1		1.03462	0.043	0.96176	0.058	0.09054	0.043	2e-05
YHR045W	YHR045W		0.96278	0.209	0.9181	0.107	0.04117	0.208	0.00269
YHR046C	INM1		0.88395	0.139	0.86668	0.183	0.06169	0.139	0.00106
YHR047C	AAP1		0.96995	0.053	1.022	0.08	-0.03473	0.053	4e-05
YHR048W	YHK8		0.92195	0.05	0.92064	0.048	-0.01019	0.049	4e-05
YHR049C-A	YHR049C-A		1.0571	0.056	1.10073	0.013	-0.04134	0.056	4e-05
YHR049W	FSH1		0.99829	0.017	1.02032	0.029	-0.02006	0.017	9e-05	status=JK
YHR050W	SMF2		0.95697	0.032	0.99697	0.035	-0.04068	0.032	1e-05
YHR057C	CPR2		0.99675	0.12	1.00894	0.085	-0.0028	0.12	0.00047
YHR059W	FYV4		0.00134	0.002	0.05184	0.061	-0.0419	0.002	0.42265	status=JK
YHR061C	GIC1		0.20144	0.128	0.33215	0.129	-0.12437	0.128	0.05132
YHR066W	SSF1		0.81124	0.021	0.84431	0.012	-0.04003	0.021	0
YHR067W	HTD2		0.79311	0.043	0.76668	0.005	0.02758	0.043	0.00099	status=JK
YHR073W	OSH3		1.0985	0.035	1.14138	0.07	-0.0305	0.035	0.00033	status=JK
YHR075C	PPE1		0.93456	0.038	0.98767	0.036	-0.05455	0.038	2e-05
YHR076W	PTC7		0.91314	0.046	0.95327	0.012	-0.04118	0.046	3e-05
YHR077C	NMD2		0.95683	0.047	0.96478	0.031	-0.01563	0.046	3e-05
YHR078W	YHR078W		1.2164	0.011	1.15639	0.054	0.05528	0.011	3e-05	status=JK
YHR079C	IRE1		1.06759	0.019	1.10759	0.056	-0.03212	0.019	0.0001	status=JK
YHR079C-B	YHR079C-B		1.07523	0.034	1.07888	0.036	0.004	0.034	1e-05
YHR080C	YHR080C		1.03742	0.088	1.03693	0.017	-0.00193	0.088	0.00017
YHR081W	LRP1		0.70233	0.022	0.6702	0.025	0.03643	0.022	1e-05
YHR082C	KSP1		1.06866	0.032	1.03294	0.037	0.03392	0.032	1e-05
YHR086W	NAM8		1.11678	0.108	0.99633	0.068	0.12365	0.108	0.00025
YHR087W	RTC3		0.94303	0.078	0.95873	0.143	0.00176	0.078	0.00016
YHR092C	HXT4		1.03611	0.035	1.01408	0.019	0.02048	0.035	1e-05
YHR093W	YHR093W		1.03227	0.02	1.01268	0.026	0.01866	0.02	0
YHR094C	HXT1		1.05536	0.033	1.07915	0.021	-0.02725	0.033	1e-05
YHR095W	YHR095W		1.03066	0.039	1.10484	0.004	-0.07664	0.039	2e-05
YHR096C	HXT5		1.02058	0.067	1.02205	0.048	-0.00366	0.067	8e-05
YHR097C	YHR097C		0.96527	0.047	0.95965	0.047	0.00494	0.047	3e-05
YHR103W	SBE22		0.93912	0.01	0.98526	0.051	-0.04223	0.01	4e-05	status=JK
YHR104W	GRE3		1.01225	0.033	1.00588	0.042	0.00578	0.033	1e-05
YHR105W	YPT35		0.99793	0.025	0.99375	0.002	0.00409	0.025	0
YHR106W	TRR2		1.0858	0.044	1.05967	0.032	0.02229	0.044	2e-05
YHR108W	GGA2		0.97675	0.093	0.98856	0.041	-0.00634	0.092	0.00023
YHR109W	CTM1		1.02128	0.053	0.98622	0.046	0.0259	0.052	4e-05
YHR110W	ERP5		1.08955	0.012	1.06977	0.077	0.01143	0.012	4e-05	status=JK
YHR111W	UBA4		0.9466	0.007	0.94353	0.016	0.00878	0.007	2e-05	status=JK
YHR112C	YHR112C		0.93433	0.011	1.00356	0.023	-0.05682	0.011	4e-05	status=JK
YHR113W	APE4		0.9357	0.037	0.95518	0.057	-0.02528	0.037	2e-05
YHR114W	BZZ1		1.05362	0.072	1.1019	0.086	-0.05272	0.072	9e-05
YHR115C	DMA1		1.00609	0.023	0.98626	0.019	0.02401	0.023	0.00018	status=JK
YHR116W	COX23		0.76573	0.046	0.78383	0.037	-0.01364	0.046	6e-05
YHR117W	TOM71		0.99925	0.057	0.97368	0.028	0.03241	0.057	5e-05
YHR121W	LSM12		1.02741	0.074	1.04594	0.1	-0.03877	0.074	0.0001
YHR123W	EPT1		1.04843	0.076	1.07583	0.035	-0.03616	0.076	0.0001
YHR124W	NDT80		1.03379	0.039	1.01136	0.028	0.02381	0.039	1e-05
YHR125W	YHR125W		1.00514	0.038	1.02353	0.006	-0.01897	0.038	2e-05
YHR126C	ANS1		0.99655	0.022	0.9715	0.05	0.01389	0.022	0.00016	status=JK
YHR127W	YHR127W		0.87006	0.019	0.9747	0.01	-0.10792	0.019	0
YHR129C	ARP1		0.88338	0.063	0.89362	0.072	0.01022	0.063	0.0001
YHR130C	YHR130C		1.08562	0.045	1.07786	0.042	0.01489	0.045	2e-05
YHR131C	YHR131C		0.98613	0.069	0.97998	0.005	0.00493	0.069	9e-05
YHR132C	ECM14		0.94954	0.042	1.02642	0.049	-0.07915	0.042	2e-05
YHR132W-A	IGO2		1.01593	0.012	0.9776	0.032	0.03855	0.012	5e-05	status=JK
YHR133C	NSG1		1.05529	0.103	1.01257	0.016	0.04673	0.103	0.00026
YHR134W	WSS1		0.88044	0.04	0.93028	0.051	-0.05544	0.04	3e-05
YHR135C	YCK1		1.01274	0.022	1.0053	0.028	0.00466	0.022	0
YHR136C	SPL2		1.06264	0.028	1.05777	0.01	0.00183	0.028	1e-05
YHR137W	ARO9		1.18863	0.045	1.09578	0.074	0.11034	0.045	1e-05
YHR138C	YHR138C		1.06606	0.001	1.10375	0.147	-0.05524	0.001	0	status=JK
YHR139C	SPS100		1.06191	0.033	1.02331	0.071	0.02558	0.033	1e-05
YHR139C-A	YHR139C-A		1.07086	0.057	1.09871	0.011	-0.03047	0.057	4e-05
YHR140W	YHR140W		0.99008	0.072	1.04427	0.003	-0.05559	0.071	0.0001
YHR142W	CHS7		1.01917	0.069	1.03134	0.076	-0.02921	0.069	9e-05
YHR143W	DSE2		0.91953	0.007	0.88716	0.063	0.04729	0.007	0
YHR146W	CRP1		1.08149	0.065	1.07123	0.028	0.01556	0.064	6e-05
YHR150W	PEX28		1.06413	0.076	1.05426	0.092	0.00339	0.075	0.0001
YHR151C	MTC6		0.99613	0.038	1.02267	0.051	-0.02796	0.038	2e-05
YHR152W	SPO12		1.15619	0.026	1.10044	0.138	0.02999	0.026	0.00017	status=JK
YHR153C	SPO16		0.97062	0.131	0.64855	0.535	0.254	0.131	0.00067
YHR154W	RTT107		1.05386	0.01	1.03608	0.063	0.02224	0.01	3e-05	status=JK
YHR155W	YSP1		1.04832	0.006	1.2234	0.005	-0.17579	0.006	1e-05	status=JK
YHR156C	LIN1		0.97894	0.08	0.80096	0.042	0.15569	0.08	0.00015
YHR157W	REC104		1.0332	0.186	1.10463	0.081	-0.07742	0.185	0.00156
YHR158C	KEL1		0.95198	0.063	0.85497	0.186	0.04161	0.062	8e-05
YHR159W	TDA11		0.99302	0.128	0.9004	0.121	0.07645	0.128	0.00059
YHR160C	PEX18		1.05301	0.073	1.0551	0.065	0.00719	0.073	9e-05
YHR161C	YAP1801		1.03621	0.105	0.97037	0.15	0.03827	0.105	0.00029
YHR162W	MPC2		0.95795	0.076	0.97305	0.028	-0.01888	0.075	0.00013
YHR163W	SOL3		0.98175	0.076	0.93634	0.067	0.0359	0.076	0.00013
YHR167W	THP2		1.00513	0.041	1.0286	0.037	-0.03629	0.041	2e-05
YHR171W	ATG7		1.03947	0.067	0.99007	0.033	0.05216	0.067	7e-05
YHR176W	FMO1		1.06157	0.004	1.09259	0.033	-0.03696	0.004	1e-05	status=JK
YHR178W	STB5		0.77172	0.032	0.71365	0.013	0.06446	0.032	2e-05
YHR179W	OYE2		1.02873	0.061	1.02649	0.058	0.00485	0.061	6e-05
YHR180W	YHR180W		1.19394	0.086	1.16255	0.057	0.04566	0.086	0.0001
YHR181W	SVP26		1.14182	0.052	1.1117	0.038	0.02819	0.052	3e-05
YHR182W	YHR182W		1.03048	0.148	1.08371	0.157	-0.09255	0.148	0.0008
YHR184W	SSP1		1.10936	0.147	1.1871	0.07	-0.09	0.147	0.00064
YHR185C	PFS1		1.06298	0.011	1.05661	0.038	0.01362	0.011	3e-05	status=JK
YHR189W	PTH1		0.9043	0.01	0.86523	0.039	0.03903	0.01	0
YHR191C	CTF8		0.96776	0.032	0.96448	0.043	-0.00728	0.031	1e-05
YHR193C	EGD2		0	0	0	0	0	0	#NUM!
YHR194W	MDM31		0.11789	0.06	0.11508	0.014	0.00959	0.06	0.02988
YHR195W	NVJ1		1.06455	0.03	1.01167	0.028	0.05329	0.03	1e-05
YHR198C	AIM18		0.8055	0.019	0.83477	0.009	-0.03273	0.019	0.00018	status=JK
YHR199C	AIM46		1.02123	0.013	1.01021	0.034	0.00856	0.013	6e-05	status=JK
YHR200W	RPN10		0.86612	0.014	0.86238	0.003	0.00477	0.014	8e-05	status=JK
YHR202W	YHR202W		0.93917	0.078	0.85033	0.029	0.08836	0.078	0.00016
YHR203C	RPS4B		0.65945	0.107	0.71636	0.132	-0.05776	0.107	0.00115
YHR204W	MNL1		0.99753	0.052	1.04681	0.01	-0.05184	0.052	4e-05
YHR206W	SKN7		1.04998	0.022	1.06109	0.019	-0.0079	0.022	0
YHR207C	SET5		1.06194	0.025	1.01388	0.046	0.04618	0.024	0.00018	status=JK
YHR209W	CRG1		1.05749	0.021	1.02994	0.018	0.02751	0.021	0
YHR210C	YHR210C		0.93898	0.009	0.9736	0.035	-0.03894	0.009	3e-05	status=JK
YIL001W	YIL001W		0.87027	0.058	0.93394	0.078	-0.05709	0.058	8e-05
YIL002C	INP51		0.99894	0.026	0.97775	0.014	0.02039	0.025	0
YIL005W	EPS1		1.02274	0.087	1.04381	0.012	-0.01934	0.087	0.00017
YIL006W	YIA6		0.91956	0.026	0.90683	0.045	0.00914	0.026	1e-05
YIL007C	NAS2		1.02054	0.036	0.97229	0.083	0.05631	0.036	1e-05
YIL008W	URM1		0.88055	0.084	0.89008	0.108	-0.03326	0.084	0.00024
YIL009C-A	EST3		0.96316	0.078	1.04702	0.026	-0.08868	0.077	0.00014
YIL010W	DOT5		0.97747	0.049	1.00568	0.047	-0.02774	0.048	3e-05
YIL011W	TIR3		0.03071	0.036	0.04529	0.078	0.03064	0.036	0.18761
YIL012W	YIL012W		1.04422	0.016	1.05774	0.055	-0.0413	0.016	8e-05	status=JK
YIL013C	PDR11		1.10213	0.003	1.06498	0.099	0.0404	0.003	0	status=JK
YIL014W	MNT3		1.06754	0.013	1.0061	0.106	0.05234	0.013	0
YIL015C-A	YIL015C-A		0.98423	0.058	1.02592	0.007	-0.03921	0.058	6e-05
YIL015W	BAR1		0.93675	0.084	0.96347	0.044	-0.03408	0.084	0.0002
YIL016W	SNL1		1.12541	0.048	1.0751	0.033	0.05048	0.048	2e-05
YIL017C	VID28		0.88862	0.163	0.96101	0.131	-0.08763	0.163	0.00165
YIL020C	HIS6		0.53018	0.096	0.532	0.04	0.002	0.095	0.00157
YIL023C	YKE4		1.04776	0.019	1.00875	0.023	0.04273	0.019	0.00011	status=JK
YIL024C	YIL024C		1.0751	0.03	1.10649	0.028	-0.03705	0.03	1e-05
YIL025C	YIL025C		1.02428	0.032	0.97447	0.03	0.0446	0.032	1e-05
YIL027C	EMC5		1.0779	0.068	1.08394	0.062	-0.01204	0.067	7e-05
YIL028W	YIL028W		1.03158	0.04	0.97004	0.04	0.05485	0.04	2e-05
YIL029C	YIL029C		1.03082	0.074	1.07036	0.049	-0.02544	0.074	0.0001
YIL030C	SSM4		0.92115	0.039	1.0314	0.021	-0.11939	0.039	2e-05
YIL032C	YIL032C		0.98329	0.043	0.99041	0.02	-0.00234	0.043	2e-05
YIL034C	CAP2		0.98855	0.048	0.99294	0.059	-0.01988	0.048	3e-05
YIL035C	CKA1		0.91984	0.179	1.03277	0.085	-0.09982	0.179	0.00197
YIL036W	CST6		0.93305	0.07	0.92938	0.099	0.01567	0.07	0.00011
YIL037C	PRM2		1.00362	0.028	0.97075	0.013	0.02992	0.028	1e-05
YIL038C	NOT3		0.99041	0.015	0.96726	0.035	0.02021	0.015	0
YIL039W	TED1		1.00194	0.027	0.99616	0.03	0.00807	0.027	1e-05
YIL040W	APQ12		0.36334	0.011	0.33775	0.076	0.0402	0.011	0.00033	status=JK
YIL041W	GVP36		0.94849	0.1	1.0214	0.018	-0.08167	0.1	0.00032
YIL042C	PKP1		0.97167	0.049	0.97569	0.018	-0.00507	0.048	3e-05
YIL043C	CBR1		1.16729	0.096	1.12786	0.093	0.05759	0.096	0.00015
YIL044C	AGE2		0.9372	0.016	0.89583	0.046	0.03204	0.016	0
YIL045W	PIG2		0.97951	0.018	1.01844	0.077	-0.05228	0.018	0
YIL047C	SYG1		1.09958	0.001	1.09227	0.027	0.01101	0.001	0	status=JK
YIL049W	DFG10		1.02575	0.056	1.03759	0.037	-0.01055	0.056	5e-05
YIL050W	PCL7		1.0438	0.009	1.01865	0.035	0.03372	0.009	3e-05	status=JK
YIL052C	RPL34B		1.024	0.075	0.91928	0.146	0.06713	0.075	0.00011
YIL053W	RHR2		0.8541	0.059	0.93828	0.04	-0.07802	0.059	9e-05
YIL054W	YIL054W		1.04766	0.061	0.99429	0.151	0.02478	0.061	6e-05
YIL055C	YIL055C		0.96569	0.094	0.75313	0.121	0.22898	0.094	0.00025
YIL056W	VHR1		0.91357	0.051	0.9494	0.021	-0.02451	0.051	5e-05
YIL057C	RGI2		0.93668	0.07	0.94317	0.128	-0.04934	0.07	0.00011
YIL058W	YIL058W		0.96341	0.015	0.88658	0.184	0.03099	0.015	0
YIL059C	YIL059C		0.93556	0.067	1.10096	0.027	-0.17864	0.067	0.0001
YIL060W	YIL060W		0.94194	0.147	0.91423	0.125	0.05481	0.146	0.00102
YIL064W	SEE1		0.96656	0.012	0.89239	0.118	0.04728	0.012	5e-05	status=JK
YIL065C	FIS1		0.92021	0.064	0.94276	0.01	-0.02684	0.064	9e-05
YIL066C	RNR3		1.05298	0.031	1.05861	0.024	0.00123	0.03	1e-05
YIL067C	YIL067C		0.90321	0.027	0.97351	0.031	-0.07376	0.027	1e-05
YIL070C	MAM33		1.03017	0.048	1.03048	0.02	-0.00437	0.048	3e-05
YIL071C	PCI8		1.08249	0.043	1.08602	0.026	0.00343	0.043	2e-05
YIL072W	HOP1		1.08201	0.006	1.03625	0.037	0.03777	0.006	1e-05	status=JK
YIL073C	SPO22		0.96922	0.049	0.91765	0.081	0.05417	0.049	4e-05
YIL074C	SER33		1.0513	0.009	1.00489	0.038	0.052	0.009	2e-05	status=JK
YIL076W	SEC28		0.99339	0.007	0.94932	0.061	0.04354	0.007	2e-05	status=JK
YIL077C	YIL077C		0.99889	0.116	0.93038	0.095	0.05926	0.116	0.00042
YIL079C	AIR1		1.03771	0.1	1.05478	0.038	-0.01656	0.1	0.00025
YIL084C	SDS3		0.82791	0.023	0.78547	0.026	0.04992	0.023	1e-05
YIL085C	KTR7		0.97589	0.116	0.95225	0.091	0.03038	0.116	0.00046
YIL086C	YIL086C		0.9744	0.044	0.90448	0.044	0.06712	0.044	3e-05
YIL087C	AIM19		1.03579	0.034	0.99349	0.006	0.04296	0.034	1e-05
YIL088C	AVT7		1.04773	0.036	1.01824	0.004	0.02892	0.036	1e-05
YIL089W	YIL089W		1.04833	0.032	1.10463	0.067	-0.04308	0.032	1e-05
YIL090W	ICE2		0.69724	0.028	0.56989	0.085	0.10917	0.028	2e-05
YIL092W	YIL092W		0.95711	0.025	0.90479	0.002	0.05224	0.025	0
YIL093C	RSM25		1.02829	0.063	1.02659	0.019	0.00218	0.063	6e-05
YIL094C	LYS12		0.72237	0.022	0.69185	0.039	0.02759	0.022	1e-05
YIL095W	PRK1		0.99339	0.044	1.02839	0.028	-0.03665	0.044	2e-05
YIL096C	YIL096C		1.02212	0.189	1.07514	0.107	-0.05608	0.189	0.0017
YIL097W	FYV10		1.0513	0.116	0.98165	0.014	0.074	0.116	0.00036
YIL098C	FMC1		0.9778	0.048	0.9441	0.02	0.03391	0.048	3e-05
YIL099W	SGA1		1.05463	0.022	1.06918	0.022	-0.01078	0.022	0
YIL100W	YIL100W		0.97056	0.036	0.99948	0.011	-0.03255	0.036	1e-05
YIL101C	XBP1		1.04675	0.017	1.01732	0.008	0.02619	0.016	0
YIL102C	YIL102C		1.01767	0.013	1.06489	0.017	-0.04279	0.013	5e-05	status=JK
YIL103W	DPH1		0.99658	0.043	1.02222	0.055	-0.02339	0.043	2e-05
YIL105C	SLM1		0.98052	0.037	1.07653	0.014	-0.09765	0.037	1e-05
YIL107C	PFK26		0.98774	0.043	1.01362	0.035	-0.02206	0.043	2e-05
YIL108W	YIL108W		1.01608	0.031	1.02447	0.017	-0.00591	0.031	1e-05
YIL110W	HPM1		0.72772	0.026	0.76714	0.027	-0.03793	0.025	1e-05
YIL111W	COX5B		0.91949	0.053	0.91517	0.045	0.00431	0.053	5e-05
YIL112W	HOS4		0.89239	0.153	0.97915	0.09	-0.08223	0.152	0.00134
YIL113W	SDP1		0.9525	0.128	0.90423	0.148	0.05634	0.128	0.00066
YIL114C	POR2		1.02794	0.026	0.99884	0.027	0.02382	0.026	0
YIL116W	HIS5		0.64546	0.086	0.66066	0.047	-0.01193	0.086	0.00065
YIL117C	PRM5		1.03093	0.035	1.0253	0.055	0.0167	0.035	1e-05
YIL119C	RPI1		1.06011	0.019	1.0072	0.017	0.05754	0.019	0.00011	status=JK
YIL120W	QDR1		1.05561	0.013	1.03611	0.031	0.02238	0.013	5e-05	status=JK
YIL122W	POG1		0.90714	0.047	0.92605	0.083	-0.01245	0.047	4e-05
YIL123W	SIM1		1.03813	0.037	1.04855	0.007	-0.01297	0.037	1e-05
YIL124W	AYR1		0.97734	0.085	0.97693	0.054	0.00265	0.085	0.00018
YIL125W	KGD1		0.00174	0.003	0.01235	0.021	0.00114	0.003	0.42265	status=JK
YIL128W	MET18		0.75965	0.063	0.83943	0.019	-0.07942	0.063	0.00015
YIL130W	ASG1		1.03774	0.038	1.0592	0.011	-0.01683	0.038	1e-05
YIL131C	FKH1		0.99592	0.053	1.00215	0.05	-0.0203	0.053	4e-05
YIL132C	CSM2		0.92547	0.148	0.91041	0.133	0.00511	0.148	0.0011
YIL133C	RPL16A		0.76612	0.01	0.78203	0.144	-0.04646	0.01	6e-05	status=JK
YIL134W	FLX1		0.79617	0.014	0.67185	0.057	0.10934	0.014	0
YIL135C	VHS2		1.12485	0.011	1.14284	0.038	-0.016	0.011	3e-05	status=JK
YIL136W	OM45		1.04509	0.056	1.03703	0.084	-0.00595	0.056	4e-05
YIL137C	TMA108		1.00543	0.01	0.84225	0.145	0.13573	0.01	3e-05	status=JK
YIL138C	TPM2		1.01496	0.042	0.97828	0.053	0.04649	0.042	2e-05
YIL139C	REV7		0.96398	0.068	0.92584	0.093	0.02101	0.068	0.0001
YIL140W	AXL2		1.02586	0.021	1.10143	0.066	-0.06566	0.021	0
YIL141W	YIL141W		1.03957	0.116	1.08881	0.049	-0.04945	0.115	0.00038
YIL145C	PAN6		0.99266	0.002	0.98047	0.079	0.01687	0.002	0	status=JK
YIL146C	ATG32		1.00847	0.034	0.96651	0.078	0.04044	0.034	0.00037	status=JK
YIL148W	RPL40A		1.00775	0.026	0.97704	0.013	0.02765	0.026	0
YIL149C	MLP2		1.00619	0.003	1.02404	0.066	-0.00515	0.003	0	status=JK
YIL151C	YIL151C		1.00534	0.024	0.94932	0.069	0.04117	0.024	0
YIL152W	YIL152W		1.01994	0.035	0.97704	0.025	0.03686	0.035	1e-05
YIL153W	RRD1		0.90505	0.036	0.89511	0.026	0.01106	0.036	2e-05
YIL154C	IMP2'		0.82635	0.072	0.83508	0.059	-0.00873	0.072	0.00018
YIL155C	GUT2		1.02321	0.059	1.01844	0.065	0.00248	0.059	5e-05
YIL156W	UBP7		1.03196	0.089	1.09753	0.076	-0.07858	0.089	0.00018
YIL157C	COA1		1.06263	0.082	1.0366	0.013	0.03109	0.081	0.00012
YIL158W	AIM20		1.07817	0.012	1.06296	0.065	0.03197	0.012	4e-05	status=JK
YIL159W	BNR1		0.89503	0.095	0.96476	0.156	-0.05065	0.095	0.00032
[truncated: 2,323 more rows]

## Sheet: DMA U Rep2
Array ORF	Array Name	Array annotation	Normalized colony size (EXPERIMENT)	Normalized colony std. dev. (EXPERIMENT)	Normalized colony size (CONTROL)	Normalized colony std. dev. (CONTROL)	Score	Score stdev	p-Value	Additional information
YAL002W	VPS8		0.63556	0.045	0.92118	0.039	-0.27888	0.045	0.00166	status=JK
YAL004W	YAL004W		1.0716	0.044	1.09141	0.026	-0.01188	0.044	0.00057	status=JK
YAL005C	SSA1		1.00062	0.104	1.00953	0.027	-0.00723	0.104	0.00031
YAL007C	ERP2		0.97933	0.067	1.09033	0.036	-0.12027	0.067	9e-05
YAL008W	FUN14		1.17574	0.172	1.21147	0.055	-0.02517	0.172	0.00085
YAL010C	MDM10		0.84256	0.028	0.73528	0.016	0.10864	0.028	0.00037	status=JK
YAL011W	SWC3		0.8977	0.01	0.90012	0.04	-0.00126	0.01	4e-05	status=JK
YAL013W	DEP1		0.70522	0.112	0.69857	0.027	0.01052	0.112	0.00108
YAL014C	SYN8		1.03075	0.129	1.01807	0.083	0.02084	0.129	0.00054
YAL015C	NTG1		1.0235	0.135	1.03529	0.086	-0.00478	0.135	0.00063
YAL017W	PSK1		1.11263	0.046	1.00358	0.023	0.10912	0.046	0.00057	status=JK
YAL018C	YAL018C		0.98844	0.041	0.9924	0.079	-4e-05	0.041	0.00057	status=JK
YAL019W	FUN30		0.91176	0.036	0.93428	0.037	-0.02319	0.036	2e-05
YAL020C	ATS1		0.98475	0.092	0.95253	0.042	0.03982	0.092	0.00023
YAL022C	FUN26		0.93594	0.015	0.88887	0.014	0.04521	0.015	9e-05	status=JK
YAL023C	PMT2		1.04772	0.035	1.07477	0.019	-0.02756	0.035	0.00037	status=JK
YAL024C	LTE1		0.685	0.143	0.78011	0.092	-0.09146	0.143	0.00243
YAL026C	DRS2		0.67591	0.088	0.65498	0.024	0.03102	0.088	0.0006
YAL027W	SAW1		1.03307	0.197	0.95753	0.002	0.07646	0.197	0.00186
YAL028W	FRT2		0.98995	0.029	0.95718	0.027	0.02662	0.028	0.00028	status=JK
YAL029C	MYO4		1.06352	0.051	1.09825	0.034	-0.04097	0.05	0.00075	status=JK
YAL030W	SNC1		0.95177	0.086	0.934	0.042	0.01234	0.086	0.0002
YAL031C	GIP4		0.91361	0.092	1.09137	0.037	-0.181	0.091	0.00028
YAL034C	FUN19		1.01371	0.162	0.94516	0.077	0.07293	0.161	0.00109
YAL036C	RBG1		1.03189	0.056	1.05115	0.014	-0.01179	0.056	4e-05
YAL037W	YAL037W		1.17826	0.021	1.09548	0.038	0.0844	0.021	0.00011	status=JK
YAL040C	CLN3		1.00487	0.034	0.90964	0.046	0.0864	0.034	1e-05
YAL042W	ERV46		1.08011	0.116	1.11206	0.005	-0.02885	0.116	0.00381	status=JK
YAL043C-A	YAL043C-A		0.93849	0.122	0.95776	0.034	-0.02252	0.122	0.0006
YAL045C	YAL045C		0.94723	0.1	1.0715	0.046	-0.11334	0.1	0.00032
YAL046C	AIM1		0.97728	0.105	1.17032	0.024	-0.18509	0.105	0.00034
YAL048C	GEM1		0.94265	0.04	0.95757	0.01	-0.01476	0.04	2e-05
YAL049C	AIM2		0.99207	0.087	0.96304	0.04	0.02778	0.086	0.00018
YAL051W	OAF1		0.91209	0.111	0.85272	0.028	0.06244	0.111	0.00049
YAL053W	FLC2		0.88103	0.109	0.98073	0.086	-0.10575	0.108	0.00051
YAL054C	ACS1		0.95063	0.01	1.08197	0.084	-0.14287	0.01	4e-05	status=JK
YAL055W	PEX22		0.99402	0.138	0.87742	0.074	0.10464	0.138	0.00073
YAL056W	GPB2		1.04394	0.087	0.96791	0.089	0.0526	0.087	0.00016
YAL058C-A	YAL058C-A		1.01278	0.101	0.94588	0.043	0.07254	0.101	0.00027
YAL058W	CNE1		1.01817	0.063	0.95414	0.046	0.06191	0.063	6e-05
YAL059W	ECM1		0.99262	0.085	1.00567	0.043	-0.00901	0.085	0.00017
YAL060W	BDH1		1.25041	0.045	1.11764	0.035	0.13004	0.044	0.00042	status=JK
YAL061W	BDH2		0.99475	0.099	1.00697	0.019	-0.01585	0.099	0.00027
YAL062W	GDH3		1.07094	0.057	1.06152	0.039	0.01728	0.057	4e-05
YAL064C-A	TDA8		1.06901	0.009	1.08502	0.08	-0.02842	0.009	0
YAL065C	YAL065C		1.11379	0.077	1.11298	0.025	0.0076	0.077	9e-05
YAL066W	YAL066W		1.017	0.066	1.03422	0.072	-0.01092	0.066	8e-05
YAL067C	SEO1		0.99329	0.155	1.02356	0.059	-0.03427	0.154	0.00102
YAL068C	PAU8		0.95398	0.192	0.97007	0.003	-0.01524	0.192	0.00217
YAR002C-A	ERP1		1.06661	0.092	1.0315	0.057	0.02022	0.092	0.00017
YAR002W	NUP60		1.07272	0.087	1.04924	0.029	0.02104	0.087	0.00015
YAR003W	SWD1		0.88618	0.042	0.82718	0.048	0.07021	0.042	3e-05
YAR014C	BUD14		0.75969	0.01	0.77188	0.039	-0.01063	0.01	6e-05	status=JK
YAR015W	ADE1		1.11684	0.121	1.02341	0.028	0.09977	0.121	0.00035
YAR018C	KIN3		0.376	0.142	0.64368	0.083	-0.26356	0.142	0.01326
YAR020C	PAU7		0.81766	0.094	0.94719	0.061	-0.14008	0.094	0.00041
YAR023C	YAR023C		0.96391	0.21	1.12911	0.058	-0.17635	0.21	0.00275
YAR027W	UIP3		0.93209	0.025	0.93738	0.047	0.00566	0.025	0.00024	status=JK
YAR028W	YAR028W		0.99284	0.057	1.02131	0.063	-0.03386	0.057	5e-05
YAR029W	YAR029W		1.00601	0.032	0.96599	0.041	0.03958	0.032	0.00035	status=JK
YAR030C	YAR030C		1.02134	0.118	1.05017	0.031	-0.03187	0.117	0.00042
YAR031W	PRM9		1.05972	0.009	1.04078	0.037	0.01079	0.009	3e-05	status=JK
YAR035W	YAT1		1.02215	0.069	1.02757	0.055	-0.0115	0.069	9e-05
YAR037W	YAR037W		1.15238	0.145	1.1424	0.066	0.01949	0.145	0.00054
YAR040C	YAR040C		0.88032	0.279	0.93773	0.051	-0.05442	0.279	0.00807
YAR042W	SWH1		0.93987	0.252	1.00382	0.07	-0.06994	0.251	0.00497
YAR043C	YAR043C		0.98398	0.027	1.05952	0.017	-0.08358	0.027	0.00025	status=JK
YAR044W	YAR044W		0.98837	0.109	1.01838	0.026	-0.02574	0.109	0.00036
YAR047C	YAR047C		1.00229	0.177	0.95595	0.053	0.03491	0.176	0.00147
YAR050W	FLO1		0.99989	0.044	1.13108	0.017	-0.12692	0.044	0.00064	status=JK
YBL001C	ECM15		1.09383	0.109	1.11208	0.019	-0.01288	0.109	0.00027
YBL003C	HTA2		1.07265	0.023	1.08356	0.029	-0.02709	0.023	0
YBL005W	PDR3		1.02533	0.106	1.06906	0.01	-0.04508	0.106	0.0003
YBL007C	SLA1		0.77064	0.058	0.73452	0.023	0.0364	0.057	0.00011
YBL008W	HIR1		0.92021	0.078	0.98257	0.028	-0.0672	0.078	0.00017
YBL009W	ALK2		0.90725	0.09	0.8261	0.098	0.06299	0.09	0.00027
YBL010C	YBL010C		1.06704	0.052	1.01208	0.045	0.0588	0.051	3e-05
YBL011W	SCT1		0.74745	0.087	0.63843	0.023	0.11119	0.087	0.00043
YBL013W	FMT1		1.14227	0.015	0.95316	0.058	0.18682	0.015	6e-05	status=JK
YBL015W	ACH1		1.17529	0.007	1.05455	0.076	0.11205	0.007	1e-05	status=JK
YBL016W	FUS3		0.69702	0.033	0.92985	0.1	-0.21294	0.033	3e-05
YBL017C	PEP1		1.0906	0.096	1.05941	0.084	0.04424	0.096	0.00019
YBL019W	APN2		1.05118	0.147	1.02496	0.013	0.02522	0.147	0.00074
YBL021C	HAP3		0.96888	0.02	0.71774	0.012	0.25248	0.02	0.00014	status=JK
YBL024W	NCL1		1.14044	0.029	0.9529	0.044	0.18398	0.029	0
YBL025W	RRN10		0.64011	0.127	0.65071	0.005	-0.01206	0.127	0.00209
YBL027W	RPL19B		0.12394	0.079	0.58442	0.023	-0.45853	0.079	0.11368	status=JK
YBL028C	YBL028C		1.23483	0.033	1.05258	0.013	0.17815	0.033	1e-05
YBL029W	YBL029W		1.06978	0.175	1.12049	0.019	-0.05826	0.174	0.00117
YBL031W	SHE1		0.0657	0.003	0.22657	0.038	-0.15378	0.003	0.00051	status=JK
YBL032W	HEK2		1.09089	0.032	1.01619	0.012	0.07767	0.032	0.00029	status=JK
YBL036C	YBL036C		0.9832	0.089	0.96499	0.036	0.02018	0.089	0.00021
YBL037W	APL3		0.9951	0.035	0.92867	0.059	0.06791	0.035	0.0004	status=JK
YBL039C	URA7		0.9247	0.092	0.82894	0.046	0.0918	0.091	0.00026
YBL042C	FUI1		1.14912	0.138	1.10704	0.032	0.04731	0.137	0.00047
YBL043W	ECM13		1.17954	0.136	1.10257	0.014	0.07756	0.135	0.00042
YBL046W	PSY4		1.25346	0.074	1.25244	0.049	0.01545	0.074	6e-05
YBL047C	EDE1		1.06945	0.103	0.96416	0.015	0.10545	0.103	0.00024
YBL048W	YBL048W		1.07347	0.03	1.13733	0.042	-0.05433	0.03	1e-05
YBL049W	MOH1		1.0437	0.09	1.10208	0.01	-0.05655	0.09	0.00018
YBL051C	PIN4		0.83995	0.015	0.89454	0.024	-0.05463	0.015	0.0001	status=JK
YBL052C	SAS3		1.03597	0.069	1.04618	0.021	-0.0041	0.069	8e-05
YBL053W	YBL053W		1.05487	0.115	1.03711	0.032	0.01403	0.114	0.00035
YBL054W	TOD6		1.09993	0.108	1.07912	0.032	0.02523	0.108	0.00026
YBL055C	YBL055C		0.98661	0.099	0.87196	0.023	0.10678	0.099	0.00028
YBL056W	PTC3		1.0207	0.026	1.05134	0.033	-0.03001	0.026	0.00021	status=JK
YBL057C	PTH2		0.8719	0.414	1.12265	0.045	-0.25776	0.413	0.02445
YBL059W	YBL059W		0.93257	0.052	0.89887	0.009	0.03565	0.052	5e-05
YBL060W	YEL1		0.91469	0.084	0.92269	0.075	0.00511	0.084	0.00021
YBL061C	SKT5		1.06399	0.114	1.00802	0.025	0.05398	0.114	0.00034
YBL062W	YBL062W		1.09275	0.019	1.04399	0.004	0.04693	0.019	0.0001	status=JK
YBL063W	KIP1		1.03878	0.112	1.08243	0.043	-0.0571	0.112	0.00034
YBL064C	PRX1		0.98201	0.096	0.9828	0.023	-0.00025	0.096	0.00025
YBL065W	YBL065W		1.0092	0.148	1.00614	0.017	-0.00103	0.147	0.00084
YBL066C	SEF1		0.89047	0.047	0.87391	0.069	0.0103	0.047	4e-05
YBL067C	UBP13		0.99571	0.106	1.11459	0.051	-0.13125	0.106	0.00033
YBL068W	PRS4		1.01066	0.041	1.06143	0.048	-0.0549	0.041	2e-05
YBL069W	AST1		1.0317	0.009	0.98741	0.063	0.03688	0.009	2e-05	status=JK
YBL070C	YBL070C		1.09151	0.104	0.92285	0.052	0.17697	0.104	0.00024
YBL071C	YBL071C		0.89383	0.171	0.98132	0.025	-0.08063	0.171	0.00188
YBL072C	RPS8A		0.41006	0.074	0.43958	0.066	-0.04537	0.074	0.00159
YBL075C	SSA3		0.94002	0.04	1.06219	0.062	-0.13382	0.04	2e-05
YBL078C	ATG8		0.7434	0.104	0.97852	0.013	-0.23784	0.103	0.00073
YBL079W	NUP170		0.6229	0.099	0.67836	0.044	-0.05687	0.099	0.00107
YBL081W	YBL081W		0.90525	0.156	0.8473	0.041	0.05022	0.156	0.00139
YBL082C	ALG3		1.09018	0.05	1.13264	0.089	-0.03736	0.05	3e-05
YBL083C	YBL083C		0.93892	0.063	1.06606	0.019	-0.13115	0.063	8e-05
YBL085W	BOI1		1.09208	0.083	1.04989	0.021	0.04405	0.083	0.00012
YBL086C	YBL086C		1.03234	0.018	1.08586	0.064	-0.05042	0.018	0.0001	status=JK
YBL087C	RPL23A		0.84782	0.03	0.94026	0.04	-0.08945	0.03	0.00043	status=JK
YBL088C	TEL1		1.29255	0.107	1.21935	0.047	0.06481	0.106	0.00015
YBL089W	AVT5		0.89529	0.099	0.91375	0.063	-0.02344	0.099	0.00037
YBL091C	MAP2		1.18974	0.067	1.11632	0.074	0.06549	0.066	5e-05
YBL091C-A	SCS22		1.02859	0.08	0.94941	0.038	0.08493	0.08	0.00013
YBL094C	YBL094C		0.26347	0.244	0.51549	0.265	-0.32449	0.243	0.11948
YBL095W	YBL095W		0.96225	0.093	0.96853	0.035	0.00203	0.093	0.00025
YBL096C	YBL096C		1.01681	0.053	0.99175	0.062	0.01075	0.053	4e-05
YBL098W	BNA4		0.96271	0.107	0.88087	0.067	0.07698	0.107	0.00037
YBL100C	YBL100C		1.01143	0.043	1.00815	0.055	0.00067	0.043	2e-05
YBL101C	ECM21		1.06601	0.037	1.03813	0.005	0.02785	0.037	1e-05
YBL102W	SFT2		0.99199	0.093	0.99299	0.032	-0.0053	0.092	0.00022
YBL103C	RTG3		0.97359	0.09	0.90835	0.092	0.04314	0.09	0.00022
YBL103C	RTG3		0.54251	0.048	0.54101	0.019	-0.00669	0.048	0.00019
YBL104C	SEA4		1.03981	0.138	0.96507	0.215	0.03314	0.138	0.00064
YBL106C	SRO77		0.99647	0.052	0.96351	0.058	0.0247	0.052	0.00092	status=JK
YBL107C	MIC23		1.06303	0.081	1.06529	0.094	-0.02171	0.081	0.00012
YBR001C	NTH2		0.95312	0.151	0.96771	0.053	-0.01254	0.151	0.00108
YBR005W	RCR1		1.14729	0.126	1.15925	0.043	-0.01738	0.126	0.00036
YBR006W	UGA2		1.1193	0.197	1.06447	0.039	0.06644	0.196	0.00146
YBR007C	DSF2		1.09917	0.174	1.03376	0.043	0.0702	0.174	0.00107
YBR008C	FLR1		1.04978	0.061	1.03116	0.051	0.02698	0.06	5e-05
YBR009C	HHF1		0.75841	0.117	0.79247	0.084	-0.06204	0.117	0.00099
YBR010W	HHT1		0.94794	0.07	0.77793	0.102	0.16843	0.07	0.00011
YBR012C	YBR012C		0.91468	0.097	0.92265	0.044	-0.0064	0.097	0.00033
YBR013C	YBR013C		1.03321	0.035	1.01809	0.017	0.01588	0.035	0.00038	status=JK
YBR014C	GRX7		0.9814	0.051	0.971	0.032	0.01675	0.051	4e-05
YBR015C	MNN2		0.88756	0.181	0.87527	0.066	-0.00762	0.181	0.00225
YBR016W	YBR016W		1.26804	0.013	1.23307	0.106	0.05039	0.013	4e-05	status=JK
YBR018C	GAL7		0.96479	0.035	0.99874	0.056	-0.02521	0.035	0.00044	status=JK
YBR019C	GAL10		0.97642	0.152	0.93782	0.084	0.02969	0.151	0.00101
YBR020W	GAL1		0.98244	0.013	1.01966	0.091	-0.05154	0.013	6e-05	status=JK
YBR020W	GAL1		1.0531	0.048	1.08717	0.097	-0.0414	0.048	3e-05
YBR022W	POA1		0.86582	0.153	0.95621	0.02	-0.09356	0.153	0.00149
YBR023C	CHS3		1.09756	0.05	0.9395	0.027	0.16065	0.049	0.00068	status=JK
YBR024W	SCO2		1.06955	0.032	0.93544	0.021	0.12913	0.032	0.0003	status=JK
YBR025C	OLA1		0.95972	0.103	0.8914	0.036	0.05978	0.103	0.00034
YBR026C	ETR1		0.79212	0.024	0.80342	0.06	-0.01005	0.024	1e-05
YBR027C	YBR027C		1.34118	0.03	1.21498	0.064	0.122	0.029	0.00016	status=JK
YBR028C	YPK3		1.10362	0.109	1.11042	0.028	-0.00319	0.109	0.00026
YBR030W	RKM3		1.12404	0.158	1.15577	0.044	-0.03449	0.158	0.00076
YBR031W	RPL4A		1.09439	0.171	1.073	0.05	0.02246	0.171	0.00104
YBR032W	YBR032W		1.00175	0.13	1.02453	0.096	-0.02382	0.129	0.00059
YBR033W	EDS1		1.04354	0.07	1.02583	0.026	0.01616	0.069	8e-05
YBR034C	HMT1		0.97662	0.068	1.01802	0.022	-0.03915	0.067	9e-05
YBR036C	CSG2		0.63889	0.137	0.61433	0.027	0.01157	0.136	0.00258
YBR040W	FIG1		1.23468	0.089	1.23406	0.028	0.00687	0.088	0.0001
YBR041W	FAT1		1.03004	0.012	1.06754	0.032	-0.03681	0.012	4e-05	status=JK
YBR042C	CST26		0.94122	0.146	1.0512	0.031	-0.11216	0.145	0.001
YBR043C	QDR3		1.05109	0.165	0.98556	0.043	0.0717	0.164	0.00104
YBR044C	TCM62		0.98494	0.119	0.89103	0.016	0.08833	0.119	0.00048
YBR045C	GIP1		1.08805	0.031	0.99799	0.022	0.09438	0.031	0.00028	status=JK
YBR046C	ZTA1		0.99512	0.033	1.0343	0.02	-0.04467	0.033	1e-05
YBR047W	FMP23		0.98726	0.066	0.9564	0.016	0.03255	0.066	8e-05
YBR048W	RPS11B		0.7232	0.09	0.87631	0.059	-0.13861	0.09	0.00053
YBR050C	REG2		1.10144	0.035	0.98688	0.009	0.11297	0.035	0.00034	status=JK
YBR051W	YBR051W		1.16191	0.096	1.12084	0.022	0.039	0.095	0.00015
YBR052C	RFS1		0.98652	0.017	1.00483	0.035	-0.01838	0.017	0.0001	status=JK
YBR053C	YBR053C		1.15509	0.035	1.17278	0.066	-0.01056	0.035	1e-05
YBR054W	YRO2		1.00588	0.1	1.0491	0.067	-0.04262	0.1	0.00027
YBR056W	YBR056W		0.90803	0.056	1.01562	0.009	-0.10429	0.056	6e-05
YBR057C	MUM2		0.81251	0.044	0.82846	0.014	-0.01278	0.044	0.00097	status=JK
YBR058C	UBP14		0.97697	0.051	0.95092	0.015	0.02287	0.051	4e-05
YBR059C	AKL1		0.81357	0.132	0.94	0.019	-0.13332	0.132	0.00116
YBR061C	TRM7		0.67642	0.126	0.7824	0.121	-0.14087	0.126	0.00172
YBR061C	TRM7		1.11418	0.086	1.07373	0.005	0.0401	0.086	0.00013
YBR062C	YBR062C		0.97252	0.071	0.96108	0.011	0.01042	0.071	0.00011
YBR063C	YBR063C		1.06648	0.066	1.04396	0.008	0.02606	0.066	6e-05
YBR064W	YBR064W		1.0605	0.048	1.19101	0.074	-0.14635	0.048	0.00069	status=JK
YBR065C	ECM2		1.12674	0.09	1.1323	0.007	-0.0035	0.09	0.00014
YBR066C	NRG2		1.14207	0.03	1.18439	0.063	-0.03024	0.03	0.00023	status=JK
YBR067C	TIP1		0.95382	0.04	0.91717	0.068	0.0391	0.04	0.00058	status=JK
YBR068C	BAP2		1.16289	0.125	1.06745	0.036	0.10272	0.124	0.00034
YBR069C	TAT1		0.99399	0.046	1.14972	0.017	-0.15146	0.046	3e-05
YBR071W	YBR071W		0.9232	0.075	0.85132	0.018	0.07232	0.074	0.00014
YBR072W	HSP26		1.05879	0.067	1.07343	0.057	-0.0119	0.067	7e-05
YBR073W	RDH54		0.92554	0.124	0.96643	0.025	-0.03907	0.123	0.00065
YBR074W	YBR074W		0.97511	0.022	1.01821	0.068	-0.05775	0.022	0.00016	status=JK
YBR075W	YBR075W		1.03081	0.13	1.04955	0.02	-0.01703	0.13	0.00054
YBR075W	YBR075W		1.15352	0.036	1.13016	0.004	0.02159	0.036	1e-05
YBR076W	ECM8		0.85021	0.018	0.90112	0.031	-0.05141	0.018	0.00016	status=JK
YBR077C	SLM4		1.2761	0.021	1.27577	0.04	0.00523	0.021	9e-05	status=JK
YBR078W	ECM33		1.27392	0.12	1.22013	0.137	0.04707	0.12	0.00023
YBR082C	UBC4		1.03382	0.036	0.83011	0.138	0.22006	0.036	0.00041	status=JK
YBR082C	UBC4		1.0072	0.07	0.98027	0.095	0.01489	0.07	9e-05
YBR083W	TEC1		1.0803	0.114	1.07101	0.07	0.00511	0.114	0.00032
YBR084C-A	RPL19A		0.90418	0.035	0.86577	0.102	0.02583	0.035	2e-05
YBR084W	MIS1		1.08219	0.049	0.96802	0.051	0.11819	0.049	3e-05
YBR085W	AAC3		0.87613	0.012	1.02806	0.089	-0.13592	0.012	6e-05	status=JK
YBR086C	IST2		1.02419	0.03	1.07232	0.153	-0.06979	0.03	1e-05
YBR090C	YBR090C		0.93396	0.158	0.9208	0.014	0.01105	0.158	0.0013
YBR090C-A	YBR090C-A		1.02615	0.086	0.95884	0.046	0.06433	0.086	0.00016
YBR092C	PHO3		0.9711	0.035	0.98042	0.066	0.00269	0.035	1e-05
YBR093C	PHO5		0.61724	0.04	0.4234	0.077	0.19779	0.039	0.00137	status=JK
YBR094W	PBY1		1.02572	0.019	1.02984	0.007	-0.00667	0.019	0.00011	status=JK
YBR095C	RXT2		0.9736	0.077	0.75315	0.189	0.19108	0.077	0.00206	status=JK
YBR095C	RXT2		0.93177	0.024	0.78243	0.048	0.14681	0.023	0.00021	status=JK
YBR098W	MMS4		1.08332	0.125	1.1333	0.071	-0.03907	0.125	0.00042
YBR099C	YBR099C		0.91262	0.081	0.85904	0.01	0.05217	0.081	0.00019
YBR100W	YBR100W		1.11648	0.132	1.00346	0.005	0.11309	0.131	0.00045
YBR101C	FES1		0.97896	0.032	0.99295	0.074	-0.01848	0.032	0.00036	status=JK
YBR103W	SIF2		0.73374	0.013	0.74519	0.031	-0.01945	0.013	0.00011	status=JK
YBR104W	YMC2		0.74059	0.12	0.78015	0.059	-0.0472	0.12	0.00115
YBR105C	VID24		1.06974	0.022	1.12392	0.042	-0.05047	0.022	0
YBR106W	PHO88		0.03176	0.016	0.23786	0.18	-0.19762	0.016	0.0302
YBR107C	IML3		1.00392	0.067	0.9378	0.027	0.06362	0.067	8e-05
YBR108W	AIM3		1.01279	0.146	0.99249	0.028	0.02121	0.146	0.00081
YBR111C	YSA1		0.92158	0.274	1.07797	0.039	-0.16362	0.274	0.00671
YBR113W	YBR113W		0.84943	0.17	1.04911	0.064	-0.20262	0.17	0.00213
YBR114W	RAD16		1.08957	0.031	0.92671	0.029	0.15507	0.031	0.00027	status=JK
YBR115C	LYS2		0.43949	0.011	0.24758	0.031	0.17511	0.011	0.0002	status=JK
YBR115C	LYS2		0.33599	0.099	0.25571	0.042	0.08474	0.098	0.00646
YBR116C	YBR116C		1.03112	0.068	0.93443	0.053	0.1103	0.068	8e-05
YBR118W	TEF2		0.97358	0.07	0.96077	0.141	0.02023	0.07	0.0001
YBR119W	MUD1		0.88118	0.032	1.06228	0.113	-0.1861	0.032	0.00045	status=JK
YBR121C	GRS1		0.8944	0.149	0.84958	0.06	0.03172	0.149	0.00124
YBR122C	MRPL36		1.13196	0.093	1.13378	0.042	0.00929	0.093	0.00015
YBR125C	PTC4		0.87636	0.12	0.97959	0.017	-0.09374	0.119	0.00069
YBR126C	TPS1		0.63678	0.124	0.77063	0.063	-0.14971	0.124	0.00198
YBR128C	ATG14		0.80697	0.152	0.94048	0.038	-0.13796	0.152	0.0018
YBR129C	OPY1		0.96402	0.01	0.91977	0.023	0.04759	0.01	4e-05	status=JK
YBR130C	SHE3		1.00285	0.08	1.09908	0.008	-0.09636	0.08	0.00014
YBR131W	CCZ1		0.80868	0.014	0.62446	0.035	0.18331	0.014	0.0001	status=JK
YBR132C	AGP2		1.06448	0.055	1.12718	0.032	-0.06365	0.055	4e-05
YBR134W	YBR134W		1.03324	0.147	1.141	0.034	-0.10481	0.147	0.00078
YBR137W	YBR137W		0.98658	0.019	0.83637	0.034	0.15063	0.019	0.00013	status=JK
YBR138C	YBR138C		1.18196	0.123	1.11036	0.054	0.0816	0.123	0.00031
YBR139W	YBR139W		0.9205	0.134	1.10697	0.063	-0.17212	0.134	0.00083
YBR141C	YBR141C		1.01003	0.188	0.93095	0.027	0.0811	0.188	0.00174
YBR144C	YBR144C		1.04466	0.139	0.99495	0.047	0.0458	0.139	0.00064
YBR145W	ADH5		0.98929	0.122	0.8414	0.02	0.15323	0.122	0.00051
YBR146W	MRPS9		0.82976	0.113	0.99568	0.157	-0.14363	0.112	0.00068
YBR147W	RTC2		0.87147	0.155	1.0364	0.078	-0.16978	0.155	0.00152
YBR148W	YSW1		1.15027	0.07	1.25605	0.061	-0.10344	0.07	6e-05
YBR149W	ARA1		0.89687	0.076	0.8595	0.045	0.03503	0.076	0.00017
YBR150C	TBS1		1.00652	0.062	0.90269	0.028	0.10188	0.062	6e-05
YBR151W	APD1		1.12818	0.013	0.91595	0.042	0.20245	0.013	4e-05	status=JK
YBR156C	SLI15		0.81013	0.048	1.01961	0.04	-0.20942	0.048	0.00117	status=JK
YBR157C	ICS2		0.98279	0.093	0.97228	0.063	-0.0043	0.092	0.00023
YBR158W	AMN1		0.86263	0.02	1.02805	0.093	-0.17757	0.02	0.00017	status=JK
YBR159W	IFA38		1.2198	0.136	1.13435	0.013	0.0788	0.136	0.00038
YBR161W	CSH1		1.0194	0.005	1.04235	0.026	-0.01974	0.005	1e-05	status=JK
YBR162C	TOS1		0.9869	0.082	1.02995	0.021	-0.04042	0.082	0.00016
YBR162W-A	YSY6		1.0186	0.078	0.93971	0.024	0.07659	0.078	0.00012
YBR164C	ARL1		0.95771	0.129	0.90358	0.047	0.05863	0.129	0.00066
YBR165W	UBS1		1.02298	0.075	1.033	0.186	0.02928	0.075	0.00011
YBR165W	UBS1		1.02391	0.084	1.03441	0.059	-0.01698	0.083	0.00015
YBR166C	TYR1		0.9531	0.105	0.99725	0.013	-0.041	0.105	0.00036
YBR168W	PEX32		0.96028	0.058	0.96461	0.007	-4e-05	0.058	6e-05
YBR169C	SSE2		1.10571	0.054	1.02337	0.046	0.07579	0.054	3e-05
YBR170C	NPL4		0.74299	0.211	0.7594	0.031	-0.02986	0.21	0.00586
YBR171W	SEC66		0.87877	0.047	0.86853	0.063	0.02521	0.047	4e-05
YBR172C	SMY2		0.96343	0.093	1.06153	0.008	-0.09971	0.093	0.00024
YBR174C	YBR174C		0.9633	0.052	1.01638	0.007	-0.05117	0.052	4e-05
YBR175W	SWD3		0.94785	0.116	1.00402	0.021	-0.05995	0.116	0.0005
YBR176W	ECM31		1.02117	0.066	1.02675	0.021	-0.01001	0.066	0.00139	status=JK
YBR177C	EHT1		1.06057	0.089	0.94777	0.108	0.09516	0.089	0.00016
YBR178W	YBR178W		1.11991	0.111	1.14245	0.014	-0.0226	0.111	0.00027
YBR180W	DTR1		0.98882	0.064	0.9053	0.018	0.08079	0.064	8e-05
YBR181C	RPS6B		0.6704	0.13	0.69469	0.012	-0.02569	0.13	0.00194
YBR182C	SMP1		1.05762	0.057	0.98904	0.003	0.06948	0.057	4e-05
YBR183W	YPC1		0.98846	0.063	1.11751	0.048	-0.12796	0.063	0.00136	status=JK
YBR184W	YBR184W		0.93358	0.024	0.99118	0.05	-0.05447	0.024	0
YBR185C	MBA1		0.87976	0.087	0.75288	0.043	0.12263	0.087	0.00026
YBR186W	PCH2		1.01345	0.009	0.99644	0.01	0.01897	0.009	2e-05	status=JK
YBR187W	GDT1		0.9991	0.059	0.97572	0.066	0.02532	0.059	6e-05
YBR188C	NTC20		1.03179	0.087	1.09063	0.036	-0.06151	0.087	0.00017
YBR189W	RPS9B		0.35884	0.045	0.23184	0.024	0.11411	0.045	0.00054
YBR194W	AIM4		0.77713	0.057	0.77442	0.017	0.00112	0.057	0.00011
YBR195C	MSI1		1.11997	0.169	1.16011	0.077	-0.05876	0.169	0.00093
YBR197C	YBR197C		1.15269	0.051	1.23375	0.092	-0.10329	0.051	2e-05
YBR199W	KTR4		1.0328	0.154	0.94721	0.019	0.08272	0.153	0.00089
YBR200W	BEM1		0.35748	0.231	0.76907	0.092	-0.41522	0.231	0.05375
YBR201W	DER1		1.04327	0.04	1.02189	0.046	0.0299	0.04	2e-05
YBR203W	COS111		1.14862	0.067	1.16384	0.053	-0.01894	0.067	5e-05
YBR204C	LDH1		0.61385	0.039	1.03108	0.01	-0.41348	0.039	0.00134	status=JK
YBR205W	KTR3		0.98672	0.063	1.00656	0.027	-0.02752	0.063	7e-05
YBR206W	YBR206W		1.01043	0.128	0.94324	0.054	0.07813	0.128	0.00055
YBR207W	FTH1		1.20431	0.028	1.13511	0.047	0.06844	0.028	0.00018	status=JK
YBR208C	DUR1		1.0598	0.141	1.10671	0.06	-0.0512	0.14	0.00063
YBR209W	YBR209W		1.17154	0.159	1.05737	0.081	0.13349	0.159	0.00068
YBR210W	ERV15		1.08655	0.152	1.1972	0.054	-0.11783	0.152	0.00074
YBR212W	NGR1		1.04413	0.144	1.0593	0.036	-0.0089	0.144	0.00071
YBR213W	MET8		1.08213	0.037	1.04078	0.019	0.04756	0.037	1e-05
YBR214W	SDS24		0.98905	0.097	0.99707	0.048	-0.01531	0.097	0.00026
YBR215W	HPC2		1.13012	0.102	1.22484	0.011	-0.09694	0.102	0.0002
YBR216C	YBP1		1.03408	0.035	1.03184	0.038	-0.00548	0.035	0.00038	status=JK
YBR217W	ATG12		0.93747	0.146	0.83228	0.016	0.09906	0.146	0.00102
YBR218C	PYC2		1.1641	0.024	1.1467	0.052	0.01319	0.024	0
YBR219C	YBR219C		1.09677	0.032	1.04861	0.071	0.05116	0.032	1e-05
YBR220C	YBR220C		0.79321	0.046	1.01402	0.082	-0.20742	0.046	0.00114	status=JK
YBR221C	PDB1		0.88162	0.056	0.71023	0.026	0.17	0.056	7e-05
YBR222C	PCS60		0.98483	0.204	1.0413	0.036	-0.05371	0.204	0.00236
YBR223C	TDP1		0.99247	0.106	0.79436	0.081	0.18673	0.105	0.00033
YBR224W	YBR224W		0.77558	0.234	0.92106	0.026	-0.14367	0.233	0.00697
YBR225W	YBR225W		0.78388	0.109	1.01458	0.005	-0.23171	0.108	0.00072
YBR226C	YBR226C		0.93221	0.168	0.97394	0.05	-0.03447	0.168	0.00158
YBR227C	MCX1		0.89369	0.191	0.88535	0.017	0.01206	0.191	0.0026
YBR228W	SLX1		1.10166	0.138	0.98934	0.014	0.10586	0.137	0.00053
YBR229C	ROT2		0.99337	0.033	0.97518	0.013	0.01769	0.033	1e-05
YBR230C	OM14		1.0927	0.04	1.03393	0.041	0.05028	0.04	1e-05
YBR231C	SWC5		0.34362	0.167	0.38398	0.084	-0.04915	0.166	0.02589
YBR232C	YBR232C		1.08196	0.026	1.10855	0.022	-0.02202	0.026	0
YBR233W	PBP2		0.89593	0.171	0.90795	0.031	-0.01254	0.17	0.00184
YBR235W	VHC1		1.06518	0.107	0.97526	0.044	0.0834	0.107	0.00028
YBR238C	YBR238C		0.67153	0.146	0.53311	0.055	0.14337	0.145	0.0027
YBR239C	ERT1		1.12818	0.062	1.06804	0.005	0.05949	0.062	5e-05
YBR240C	THI2		0.95445	0.024	1.03306	0.038	-0.07436	0.024	0.00021	status=JK
YBR241C	YBR241C		0.93126	0.021	0.98475	0.031	-0.05895	0.021	0
YBR242W	YBR242W		1.05694	0.082	0.95959	0.017	0.09195	0.082	0.00013
YBR244W	GPX2		1.1039	0.072	0.99549	0.04	0.11927	0.072	8e-05
YBR245C	ISW1		0.95566	0.091	0.93114	0.011	0.02626	0.091	0.00024
YBR246W	RRT2		1.0165	0.138	1.0691	0.023	-0.05464	0.138	0.00068
YBR248C	HIS7		0.35031	0.019	0.38066	0.008	-0.03238	0.019	0.00093	status=JK
YBR249C	ARO4		0.9594	0.04	1.08877	0.027	-0.12725	0.039	2e-05
YBR250W	SPO23		1.05438	0.033	1.00223	0.055	0.05531	0.033	0.00033	status=JK
YBR255W	MTC4		0.98572	0.233	0.96658	0.086	0.02402	0.232	0.00345
YBR258C	SHG1		1.06385	0.042	1.04774	0.051	0.00448	0.042	0.00052	status=JK
YBR259W	YBR259W		1.07695	0.094	1.01461	0.037	0.06803	0.094	0.00018
YBR260C	RGD1		1.20397	0.07	1.14532	0.03	0.05703	0.07	5e-05
YBR261C	TAE1		0.94538	0.062	1.01661	0.009	-0.06668	0.062	8e-05
YBR262C	AIM5		0.99533	0.147	0.88288	0.009	0.11309	0.147	0.00087
YBR263W	SHM1		1.03493	0.156	1.04556	0.026	-0.00333	0.156	0.00093
YBR264C	YPT10		1.11669	0.122	1.03254	0.017	0.08245	0.122	0.00036
YBR266C	YBR266C		0.59702	0.126	0.49297	0.01	0.10348	0.126	0.0025
YBR267W	REI1		0.28904	0.034	0.3738	0.053	-0.0901	0.034	0.00045
YBR269C	FMP21		0.77834	0.232	1.01167	0.04	-0.23764	0.232	0.00678
YBR270C	BIT2		1.14795	0.182	1.06576	0.045	0.08181	0.182	0.00108
YBR271W	EFM2		0.95311	0.219	0.98455	0.019	-0.04117	0.218	0.00318
YBR272C	HSM3		1.06593	0.146	0.96437	0.068	0.10417	0.146	0.0007
YBR273C	UBX7		0.88774	0.075	0.92066	0.06	-0.01498	0.075	0.00017
YBR274W	CHK1		1.02532	0.194	1.0807	0.01	-0.0517	0.194	0.00181
YBR275C	RIF1		0.81886	0.167	0.88175	0.081	-0.0719	0.166	0.00224
YBR276C	PPS1		0.95474	0.202	1.14162	0.073	-0.17904	0.202	0.00251
YBR277C	YBR277C		0.90748	0.006	1.04174	0.013	-0.12689	0.006	1e-05	status=JK
YBR278W	DPB3		0.92644	0.14	0.94623	0.052	-0.01031	0.14	0.00094
YBR280C	SAF1		0.96497	0.17	1.01868	0.063	-0.05052	0.17	0.00146
YBR281C	DUG2		0.97119	0.186	1.04829	0.045	-0.06679	0.185	0.00186
YBR283C	SSH1		0.78571	0.021	0.77237	0.021	0.01531	0.021	0.00025	status=JK
YBR284W	YBR284W		0.93158	0.056	1.01428	0.043	-0.0831	0.056	6e-05
YBR285W	YBR285W		1.09526	0.044	1.10911	0.05	-0.01026	0.044	2e-05
YBR286W	APE3		0.93538	0.095	1.01626	0.065	-0.07708	0.094	0.00028
YBR287W	YBR287W		0.80917	0.223	0.88487	0.013	-0.0774	0.223	0.00542
YBR288C	APM3		0.72209	0.011	0.93309	0.045	-0.21287	0.011	8e-05	status=JK
YBR289W	SNF5		0.37257	0.142	0.29387	0.048	0.07156	0.142	0.01343
YBR290W	BSD2		0.90747	0.075	0.91082	0.039	-0.00701	0.075	0.00016
YBR291C	CTP1		0.82142	0.016	0.98185	0.044	-0.16259	0.016	0.00012	status=JK
YBR292C	YBR292C		1.02804	0.057	1.02962	0.102	-0.00315	0.057	0.00104	status=JK
YBR293W	VBA2		0.95044	0.006	0.90399	0.06	0.02828	0.006	1e-05	status=JK
YBR294W	SUL1		0.00721	0.011	0.39628	0.285	-0.44484	0.011	0.38424	status=JK
YBR295W	PCA1		0.91293	0.085	0.99239	0.057	-0.07421	0.085	0.00022
YBR296C	PHO89		1.02713	0.03	1.08997	0.067	-0.07262	0.03	0.00029	status=JK
YBR297W	MAL33		1.01681	0.149	1.01326	0.065	0.00231	0.149	0.00086
YBR298C	MAL31		0.90331	0.141	0.94069	0.063	-0.05109	0.141	0.00102
YBR299W	MAL32		1.11904	0.074	1.22565	0.2	-0.12002	0.074	8e-05
YBR300C	YBR300C		1.12724	0.057	1.03288	0.055	0.08809	0.057	4e-05
YBR301W	PAU24		0.98489	0.022	0.97356	0.052	0.01339	0.022	0.00016	status=JK
YCL001W	RER1		1.00893	0.016	1.04672	0.023	-0.03998	0.016	8e-05	status=JK
YCL001W-A	YCL001W-A		1.15995	0.092	1.17068	0.011	-0.00964	0.092	0.00014
YCL002C	YCL002C		0.99475	0.143	1.0553	0.028	-0.06604	0.143	0.00081
YCL006C	YCL006C		1.01249	0.191	0.90969	0.029	0.10635	0.191	0.00179
YCL009C	ILV6		1.17726	0.118	1.15072	0.004	0.02847	0.118	0.00028
YCL010C	SGF29		0.88855	0.091	0.91228	0.062	-0.02825	0.09	0.00029
YCL011C	GBP2		1.131	0.052	1.02658	0.013	0.10749	0.052	0.00072	status=JK
YCL012W	YCL012W		0.91925	0.292	1.07139	0.086	-0.15825	0.291	0.00809
YCL013W	YCL013W		0.91892	0.117	0.8546	0.009	0.06927	0.117	0.00057
YCL014W	BUD3		0.94088	0.109	1.06731	0.047	-0.13394	0.109	0.00043
YCL016C	DCC1		0.66083	0.178	0.73355	0.012	-0.0779	0.177	0.00503
YCL022C	YCL022C		0.91693	0.212	0.81854	0.085	0.07777	0.212	0.00326
YCL023C	YCL023C		0.87626	0.095	0.84531	0.108	0.03061	0.095	0.00035
YCL024W	KCC4		0.92296	0.062	0.92075	0.064	0.01153	0.062	8e-05
YCL025C	AGP1		0.77825	0.127	0.76953	0.006	0.01017	0.127	0.00118
YCL026C	YCL026C		1.14374	0.372	1.18087	0.105	-0.05928	0.371	0.00865
YCL026C-A	FRM2		0.58694	0.439	1.08064	0.015	-0.48481	0.439	0.07561
YCL027W	FUS1		1.13679	0.016	1.09536	0.023	0.04489	0.016	7e-05	status=JK
YCL028W	RNQ1		1.02755	0.063	1.0985	0.038	-0.07202	0.063	6e-05
YCL029C	BIK1		0.99332	0.107	0.99414	0.041	0.00202	0.107	0.00034
YCL030C	HIS4		0.51298	0.106	0.42018	0.061	0.10193	0.106	0.00235
YCL032W	STE50		0.95795	0.128	0.91088	0.011	0.04732	0.127	0.00064
YCL033C	MXR2		0.91876	0.129	0.85492	0.085	0.07716	0.128	0.00074
YCL034W	LSB5		0.95497	0.155	0.95606	0.054	0.01107	0.155	0.00116
YCL035C	GRX1		1.05822	0.06	1.05591	0.015	0.00743	0.06	5e-05
YCL036W	GFD2		1.22911	0.074	1.20911	0.058	0.02406	0.074	6e-05
YCL037C	SRO9		0.35009	0.169	0.77973	0.136	-0.43848	0.168	0.02544
YCL038C	ATG22		1.09977	0.097	0.94149	0.033	0.16333	0.096	0.00019
YCL039W	GID7		1.12361	0.158	1.09612	0.027	0.02874	0.158	0.00076
YCL040W	GLK1		1.07959	0.008	1.05736	0.067	0.03629	0.008	2e-05	status=JK
YCL042W	YCL042W		1.07708	0.123	1.08942	0.026	-0.01032	0.123	0.0004
YCL044C	MGR1		0.92344	0.013	0.72015	0.022	0.21329	0.013	7e-05	status=JK
YCL045C	EMC1		1.05632	0.08	1.19344	0.007	-0.13572	0.08	0.00012
YCL046W	YCL046W		0.90531	0.039	0.98473	0.064	-0.08796	0.039	0.00061	status=JK
YCL047C	POF1		1.0268	0.118	0.99245	0.009	0.03426	0.118	0.00041
YCL048W	SPS22		1.05977	0.06	0.98313	0.045	0.06907	0.06	5e-05
YCL049C	YCL049C		0.92938	0.019	0.91028	0.029	0.02244	0.019	0
YCL050C	APA1		1.11711	0.228	1.07581	0.024	0.04362	0.227	0.00225
YCL051W	LRE1		1.11257	0.131	1.11001	0.027	0.01215	0.131	0.00045
YCL055W	KAR4		0.83493	0.142	0.80308	0.036	0.03226	0.142	0.00132
YCL056C	PEX34		0.95978	0.053	1.12493	0.016	-0.16417	0.053	0.00101	status=JK
YCL057W	PRD1		1.00312	0.1	1.01014	0.018	0.00137	0.1	0.00331	status=JK
YCL060C	YCL060C		1.22	0.083	1.07543	0.012	0.14582	0.083	0.00153	status=JK
YCL061C	MRC1		0.75957	0.066	0.91422	0.075	-0.16944	0.066	0.0025	status=JK
YCL062W	YCL062W		0.88615	0.092	0.844	0.068	0.03892	0.092	0.00031
YCL063W	VAC17		0.94114	0.092	0.94576	0.057	0.00087	0.092	0.00026
YCL064C	CHA1		0.9979	0.087	0.96836	0.038	0.02849	0.087	0.00018
YCL069W	VBA3		0.91692	0.156	0.98924	0.028	-0.06673	0.156	0.00133
YCL074W	YCL074W		0.80522	0.175	0.77879	0.022	0.02666	0.174	0.0027
YCL075W	YCL075W		0.80442	0.075	0.91844	0.037	-0.111	0.075	0.00022
YCL076W	YCL076W		0.95942	0.171	0.86296	0.061	0.10495	0.17	0.00151
YCR001W	YCR001W		1.20196	0.024	1.1974	0.048	-0.00391	0.024	0.00014	status=JK
YCR005C	CIT2		1.02537	0.111	0.98027	0.016	0.04708	0.111	0.00035
YCR006C	YCR006C		1.17971	0.174	1.00249	0.014	0.17695	0.173	0.00086
YCR007C	YCR007C		1.07651	0.072	1.09822	0.009	-0.02162	0.072	8e-05
YCR008W	SAT4		0.93688	0.07	1.02776	0.011	-0.08911	0.07	0.00188	status=JK
YCR009C	RVS161		1.00073	0.072	0.60277	0.024	0.39876	0.071	0.0001
YCR010C	ADY2		1.08181	0.077	1.10666	0.027	-0.02096	0.077	0.0001
YCR011C	ADP1		1.24017	0.072	1.19647	0.018	0.05288	0.072	0.00114	status=JK
YCR014C	POL4		1.10439	0.083	1.07124	0.011	0.03834	0.083	0.00012
YCR015C	YCR015C		1.13923	0.066	1.00752	0.019	0.1243	0.066	5e-05
YCR016W	YCR016W		0.96678	0.01	0.95792	0.013	0.0151	0.01	4e-05	status=JK
YCR017C	CWH43		1.08358	0.075	1.13726	0.013	-0.05333	0.075	9e-05
YCR019W	MAK32		1.10069	0.108	1.08598	0.064	0.00487	0.107	0.00026
YCR020C	PET18		0.99468	0.179	0.9492	0.022	0.04773	0.178	0.00156
YCR020C-A	MAK31		1.28519	0.087	1.06269	0.029	0.22211	0.087	8e-05
YCR021C	HSP30		1.20321	0.109	1.16217	0.052	0.05315	0.108	0.0002
YCR022C	YCR022C		1.19954	0.087	1.14291	0.007	0.05771	0.087	0.0001
YCR023C	YCR023C		1.07392	0.116	1.08367	0.042	-0.00695	0.115	0.00034
YCR024C-A	PMP1		1.00333	0.058	0.9913	0.026	0.02637	0.058	5e-05
YCR025C	YCR025C		1.16452	0.109	1.12244	0.059	0.05137	0.108	0.00022
YCR026C	NPP1		1.00314	0.045	1.15151	0.07	-0.14935	0.045	3e-05
YCR027C	RHB1		1.04459	0.045	1.12988	0.051	-0.08176	0.045	2e-05
YCR028C-A	RIM1		0.89974	0.047	0.75357	0.013	0.14681	0.047	4e-05
YCR030C	SYP1		1.17082	0.068	1.0482	0.089	0.11912	0.068	5e-05
YCR031C	RPS14A		0.82625	0.166	0.91133	0.073	-0.10272	0.166	0.00217
YCR032W	BPH1		1.13327	0.073	0.97025	0.053	0.17696	0.073	7e-05
YCR033W	SNT1		0.62193	0.065	0.51669	0.019	0.09975	0.065	0.00032
YCR034W	FEN1		0.86925	0.165	0.80415	0.04	0.05631	0.165	0.00184
YCR036W	RBK1		1.0633	0.016	1.01613	0.055	0.03073	0.016	8e-05	status=JK
YCR037C	PHO87		1.05915	0.024	0.94835	0.012	0.10742	0.024	0.00018	status=JK
YCR043C	YCR043C		1.38591	0.072	1.20331	0.058	0.19769	0.071	4e-05
YCR044C	PER1		1.17865	0.068	1.172	0.071	0.00851	0.068	5e-05
YCR045C	RRT12		1.0787	0.143	1.00279	0.017	0.0809	0.142	0.00063
YCR048W	ARE1		1.03683	0.143	1.03343	0.012	0.00282	0.143	0.00071
YCR049C	YCR049C		1.05054	0.094	1.10261	0.06	-0.06374	0.094	0.00019
YCR050C	YCR050C		0.98624	0.064	0.99535	0.081	-0.01097	0.064	8e-05
YCR051W	YCR051W		1.1711	0.007	1.22341	0.042	-0.06097	0.007	1e-05	status=JK
YCR053W	THR4		0.45472	0.027	0.34123	0.087	0.09883	0.027	0.00117	status=JK
YCR059C	YIH1		0.82362	0.036	0.92872	0.104	-0.12698	0.036	0.00065	status=JK
YCR060W	TAH1		1.04978	0.046	1.03995	0.027	-0.00357	0.046	2e-05
YCR061W	YCR061W		1.10819	0.109	1.14989	0.022	-0.03207	0.109	0.00026
YCR062W	YCR062W		1.26478	0.145	1.10146	0.009	0.15939	0.145	0.00041
YCR063W	BUD31		0.36285	0.112	0.57676	0.008	-0.21035	0.112	0.00749
YCR065W	HCM1		1.09978	0.136	0.91782	0.048	0.18889	0.136	0.00051
YCR067C	SED4		1.04898	0.093	0.99434	0.006	0.05285	0.093	0.00019
YCR068W	ATG15		1.04639	0.077	1.0721	0.011	-0.02568	0.077	0.00011
YCR069W	CPR4		1.04051	0.092	1.16421	0.01	-0.12179	0.091	0.00019
YCR071C	IMG2		0.77337	0.041	0.48909	0.089	0.28639	0.041	0.00095	status=JK
YCR073C	SSK22		1.16633	0.038	0.98748	0.044	0.18591	0.038	1e-05
YCR073W-A	SOL2		1.19283	0.021	0.98501	0.029	0.21081	0.021	0.0001	status=JK
YCR075C	ERS1		1.22022	0.106	1.19776	0.052	0.03574	0.106	0.00018
YCR076C	FUB1		1.24282	0.177	1.26621	0.016	-0.02362	0.177	0.00079
YCR077C	PAT1		0.79573	0.019	0.7645	0.053	0.02462	0.019	0.00019	status=JK
YCR079W	PTC6		1.06439	0.078	0.9754	0.031	0.0849	0.078	0.00011
YCR081W	SRB8		0.63462	0.015	0.49456	0.01	0.13734	0.015	0.00018	status=JK
YCR082W	AHC2		1.07752	0.09	1.03973	0.034	0.04059	0.09	0.00016
YCR083W	TRX3		1.10735	0.092	1.10631	0.034	-0.00269	0.092	0.00016
YCR085W	YCR085W		1.17118	0.098	1.12724	0.051	0.03207	0.098	0.00016
YCR086W	CSM1		1.08036	0.028	1.02657	0.005	0.0532	0.028	0.00023	status=JK
YCR087C-A	YCR087C-A		0.99967	0.051	1.11349	0.028	-0.1104	0.051	4e-05
YCR087W	YCR087W		0.9678	0.093	1.08908	0.043	-0.11558	0.093	0.00024
YCR088W	ABP1		0.93991	0.114	0.97119	0.034	-0.0329	0.114	0.00049
YCR089W	FIG2		0.99084	0.116	1.06936	0.072	-0.09437	0.116	0.00043
YCR090C	YCR090C		1.06907	0.142	0.99328	0.046	0.07685	0.142	0.00064
YCR091W	KIN82		0.83582	0.072	0.91859	0.055	-0.08535	0.071	0.00017
YCR092C	MSH3		1.03353	0.115	0.96719	0.051	0.07461	0.114	0.00037
YCR095C	OCA4		1.10968	0.109	1.04521	0.059	0.04771	0.108	0.00026
YCR098C	GIT1		1.02546	0.028	1.14108	0.032	-0.10857	0.028	0.00025	status=JK
YCR099C	YCR099C		1.16044	0.057	1.11893	0.035	0.04132	0.057	3e-05
YCR100C	YCR100C		1.17209	0.138	1.1751	0.009	0.00296	0.138	0.00044
YCR101C	YCR101C		1.11727	0.228	1.07177	0.009	0.04577	0.227	0.00225
YCR102C	YCR102C		1.02614	0.151	1.05542	0.009	-0.02358	0.151	0.00086
YCR102W-A	YCR102W-A		1.06347	0.157	0.97609	0.05	0.09515	0.157	0.00087
YCR105W	ADH7		1.00801	0.011	1.03088	0.019	-0.02717	0.011	4e-05	status=JK
YCR106W	RDS1		1.13376	0.196	1.05866	0.037	0.07932	0.196	0.00139
YCR107W	AAD3		1.06194	0.009	1.05448	0.049	0.01874	0.009	2e-05	status=JK
YDL001W	RMD1		0.99084	0.134	1.03269	0.016	-0.04783	0.133	0.00067
YDL002C	NHP10		0.88353	0.001	0.76266	0.064	0.10953	0.001	0	status=JK
YDL006W	PTC1		0.70715	0.084	0.8273	0.028	-0.11588	0.084	0.00046
YDL010W	GRX6		1.06642	0.102	1.06214	0.013	0.00756	0.102	0.00024
YDL011C	YDL011C		1.02671	0.169	1.15871	0.038	-0.13913	0.169	0.0012
YDL012C	YDL012C		1.26491	0.006	1.01919	0.014	0.24339	0.006	1e-05	status=JK
YDL013W	SLX5		0.55366	0.08	0.37435	0.006	0.18061	0.08	0.00082
YDL018C	ERP3		1.19636	0.191	0.97909	0.071	0.21699	0.191	0.0011
YDL019C	OSH2		1.10746	0.006	1.09995	0.04	-0.00153	0.006	1e-05	status=JK
YDL020C	RPN4		0.78975	0.16	0.68343	0.043	0.10259	0.159	0.00219
YDL023C	YDL023C		0.90971	0.061	1.0802	0.035	-0.1668	0.061	0.00149	status=JK
YDL024C	DIA3		0.99012	0.028	0.96209	0.036	0.02714	0.028	0.00027	status=JK
YDL025C	RTK1		1.30761	0.09	1.20836	0.048	0.10057	0.089	9e-05
YDL026W	YDL026W		1.09398	0.03	0.99448	0.078	0.1007	0.03	0.00025	status=JK
YDL027C	YDL027C		1.01162	0.118	0.9217	0.08	0.0715	0.118	0.00044
YDL033C	SLM3		0.70335	0.087	0.4187	0.065	0.28568	0.087	0.00051
YDL034W	YDL034W		1.0163	0.205	1.1214	0.117	-0.08064	0.205	0.00218
YDL035C	GPR1		1.05502	0.175	0.92542	0.008	0.12619	0.175	0.00124
YDL036C	PUS9		1.1596	0.104	1.10194	0.068	0.06364	0.104	0.0002
YDL037C	BSC1		1.07168	0.018	1.09221	0.048	-0.009	0.018	9e-05	status=JK
YDL038C	YDL038C		1.09333	0.039	1.0998	0.043	-0.00312	0.039	0.00042	status=JK
YDL039C	PRM7		1.12762	0.161	1.05385	0.114	0.06678	0.16	0.00078
YDL040C	NAT1		1.02157	0.015	0.96851	0.11	0.05023	0.015	7e-05	status=JK
YDL041W	YDL041W		0.01027	0.01	0	0	0.01025	0.01	0.14417
YDL042C	SIR2		0.00083	0.001	0	0	0.00083	0.001	0.22453	status=JK
YDL046W	NPC2		1.02524	0.044	1.0538	0.031	-0.03454	0.044	2e-05
YDL048C	STP4		1.03492	0.126	1.08198	0.052	-0.04093	0.126	0.00049
YDL050C	YDL050C		1.03602	0.203	1.14834	0.064	-0.1171	0.202	0.002
YDL051W	LHP1		1.0151	0.182	1.11557	0.07	-0.10445	0.182	0.00154
YDL052C	SLC1		0.96102	0.086	1.00634	0.045	-0.05197	0.086	0.0002
YDL053C	PBP4		1.03373	0.049	0.89432	0.093	0.14635	0.049	0.00076	status=JK
YDL054C	MCH1		0.98729	0.01	0.86919	0.062	0.1304	0.01	3e-05	status=JK
YDL056W	MBP1		1.18001	0.062	1.18434	0.018	-0.00467	0.062	4e-05
YDL059C	RAD59		1.06345	0.069	1.09359	0.047	-0.01756	0.069	7e-05
YDL061C	RPS29B		0.54345	0.098	0.51104	0.069	0.02875	0.098	0.00158
YDL062W	YDL062W		0.78829	0.121	0.94961	0.058	-0.15975	0.121	0.00097
YDL065C	PEX19		0.91491	0.19	0.81579	0.099	0.0977	0.19	0.00239
YDL066W	IDP1		1.11026	0.189	0.97891	0.125	0.11388	0.189	0.00133
YDL070W	BDF2		0.96004	0.034	0.84292	0.06	0.11816	0.034	0.00042	status=JK
YDL071C	YDL071C		1.12653	0.091	1.11989	0.099	0.0159	0.091	0.00014
YDL074C	BRE1		0.48561	0.03	0.52197	0.014	-0.04281	0.03	0.00128	status=JK
YDL074C	BRE1		0.43818	0.053	0.49215	0.08	-0.04678	0.053	0.00485	status=JK
YDL076C	RXT3		0.95296	0.085	0.83678	0.11	0.10732	0.085	0.00264	status=JK
YDL077C	VAM6		0.72314	0.105	0.604	0.036	0.10987	0.105	0.00082
YDL078C	MDH3		0.56682	0.164	0.8901	0.019	-0.31166	0.164	0.00624
YDL079C	MRK1		1.21561	0.344	1.00216	0.021	0.21198	0.344	0.00584
YDL080C	THI3		0.74576	0.027	0.85425	0.063	-0.10264	0.027	0.00044	status=JK
YDL081C	RPP1A		0.5949	0.251	0.75145	0.031	-0.15005	0.251	0.01786
YDL082W	RPL13A		0.67654	0.138	0.79256	0.041	-0.12479	0.138	0.00228
YDL083C	RPS16B		0.70639	0.207	0.74379	0.081	-0.03118	0.207	0.00646
YDL085W	NDE2		1.00336	0.314	1.06279	0.025	-0.05748	0.313	0.00775
YDL086W	YDL086W		1.17295	0.133	1.2104	0.032	-0.03626	0.133	0.0004
YDL088C	ASM4		0.89806	0.093	1.02161	0.034	-0.12881	0.093	0.0003
YDL089W	NUR1		1.08072	0.108	1.05792	0.092	0.01319	0.108	0.00027
YDL090C	RAM1		0	0	0	0	0	0	#NUM!
YDL091C	UBX3		0.92121	0.048	1.04123	0.038	-0.11185	0.048	0.0009	status=JK
YDL093W	PMT5		1.06343	0.051	1.06687	0.093	-0.02459	0.051	0.00077	status=JK
YDL094C	YDL094C		0.98251	0.059	0.98568	0.015	-0.00512	0.059	6e-05
YDL095W	PMT1		1.06285	0.147	0.99001	0.024	0.07573	0.146	0.00071
YDL096C	YDL096C		0.9394	0.122	0.89545	0.059	0.04263	0.121	0.00059
YDL099W	BUG1		1.19244	0.018	1.09089	0.035	0.09551	0.018	8e-05	status=JK
YDL100C	GET3		0.94368	0.1	0.79294	0.06	0.14595	0.1	0.00033
YDL104C	QRI7		0.94363	0.032	0.82972	0.043	0.12134	0.032	1e-05
YDL106C	PHO2		1.17843	0.018	1.08678	0.035	0.09299	0.017	7e-05	status=JK
YDL109C	YDL109C		1.01952	0.034	0.94797	0.002	0.07186	0.034	0.00037	status=JK
YDL110C	TMA17		0.79528	0.076	0.86059	0.052	-0.08248	0.076	0.00024
YDL112W	TRM3		0.83236	0.042	0.95967	0.011	-0.13123	0.042	0.00083	status=JK
YDL113C	ATG20		0.91886	0.041	0.96822	0.077	-0.05924	0.041	0.00066	status=JK
YDL114W	YDL114W		0.96282	0.109	1.10797	0.032	-0.1405	0.109	0.0004
YDL117W	CYK3		0.83301	0.102	0.76824	0.022	0.07216	0.102	0.0005
YDL118W	YDL118W		0.95329	0.042	0.89389	0.052	0.05391	0.042	2e-05
YDL119C	YDL119C		0.90621	0.018	0.95089	0.044	-0.05012	0.018	0.00013	status=JK
YDL121C	YDL121C		0.90219	0.065	0.89455	0.065	-0.00143	0.065	0.0001
YDL122W	UBP1		1.09983	0.059	0.96058	0.045	0.12943	0.059	0.00095	status=JK
YDL123W	SNA4		1.01153	0.155	1.02445	0.05	-0.00414	0.155	0.00098
YDL124W	YDL124W		0.9708	0.223	1.10015	0.066	-0.12182	0.223	0.0032
YDL125C	HNT1		0.98517	0.158	0.98497	0.067	-0.00448	0.158	0.00112
YDL127W	PCL2		0.79795	0.051	0.88172	0.071	-0.08845	0.051	0.00138	status=JK
YDL128W	VCX1		0.82474	0.05	0.90628	0.051	-0.08829	0.05	0.00122	status=JK
YDL129W	YDL129W		0.99464	0.096	1.03806	0.036	-0.03393	0.096	0.00025
YDL130W	RPP1B		1.00374	0.014	0.94859	0.081	0.06466	0.014	7e-05	status=JK
YDL130W-A	STF1		1.112	0.019	1.14455	0.048	-0.0288	0.019	0.0001	status=JK
YDL131W	LYS21		1.02668	0.264	1.11933	0.048	-0.11186	0.263	0.0044
YDL133C-A	RPL41B		0.88753	0.026	0.95306	0.008	-0.06272	0.026	0.00029	status=JK
YDL133W	SRF1		0.95531	0.168	1.00605	0.01	-0.04546	0.168	0.00146
YDL134C	PPH21		1.05697	0.202	1.08484	0.026	-0.02127	0.202	0.00187
YDL134C-A	YDL134C-A		1.01562	0.147	0.96397	0.025	0.05829	0.147	0.00082
YDL135C	RDI1		1.21466	0.054	1.03467	0.004	0.17934	0.054	0.00066	status=JK
YDL136W	RPL35B		0.85353	0.138	0.97429	0.031	-0.1142	0.138	0.00113
YDL137W	ARF2		1.10627	0.099	0.90575	0.041	0.20706	0.099	0.0002
YDL138W	RGT2		0.93392	0.106	1.07377	0.125	-0.13087	0.106	0.0004
YDL142C	CRD1		0.83979	0.113	0.83775	0.058	0.01041	0.113	0.00067
YDL144C	YDL144C		1.07461	0.1	1.0645	0.057	-0.00076	0.099	0.00022
YDL146W	LDB17		0.97346	0.109	1.02315	0.115	-0.07176	0.109	0.00039
YDL149W	ATG9		0.90551	0.154	0.95969	0.028	-0.0586	0.154	0.00132
YDL154W	MSH5		1.13201	0.267	0.97848	0.044	0.15755	0.266	0.00344
YDL155W	CLB3		1.14401	0.116	1.09439	0.045	0.0491	0.115	0.00028
YDL156W	CMR1		0.939	0.099	0.88287	0.005	0.05778	0.099	0.00032
YDL157C	YDL157C		0.81473	0.168	0.78302	0.044	0.03036	0.168	0.00234
YDL159W	STE7		0	0	0	0	0	0	#NUM!	status=JK
YDL160C	DHH1		0.01069	0.004	0.004	0.005	0.00726	0.004	0.00929
YDL161W	ENT1		1.00608	0.085	1.02582	0.005	-0.01993	0.085	0.00017
YDL162C	YDL162C		0.87683	0.12	1.01796	0.09	-0.13271	0.12	0.0007
YDL167C	NRP1		0.88493	0.031	0.96996	0.028	-0.08006	0.031	1e-05
YDL168W	SFA1		1.09361	0.131	1.11397	0.024	-0.02285	0.131	0.00047
YDL169C	UGX2		1.05224	0.024	0.89433	0.09	0.16793	0.024	0
YDL170W	UGA3		1.06289	0.051	1.10248	0.009	-0.03729	0.051	3e-05
YDL171C	GLT1		1.15938	0.009	0.94905	0.051	0.21608	0.009	2e-05	status=JK
YDL172C	YDL172C		1.00553	0.114	0.95485	0.016	0.05764	0.114	0.0004
YDL173W	PAR32		0.86218	0.116	0.89827	0.033	-0.0404	0.116	0.00066
YDL174C	DLD1		1.33163	0.049	1.1159	0.004	0.21441	0.049	0.00044	status=JK
YDL175C	AIR2		1.06922	0.074	1.00995	0.068	0.0511	0.074	0.0016	status=JK
YDL176W	YDL176W		1.14119	0.091	0.97402	0.026	0.16158	0.091	0.00014
YDL177C	YDL177C		0.97668	0.084	1.02153	0.003	-0.04384	0.084	0.00017
YDL178W	DLD2		1.20113	0.018	1.19925	0.005	0.00014	0.018	7e-05	status=JK
YDL179W	PCL9		1.02613	0.119	1.00744	0.059	0.01261	0.119	0.00042
YDL180W	YDL180W		0.86744	0.152	0.95308	0.104	-0.07104	0.151	0.00143
YDL181W	INH1		1.0477	0.158	1.11382	0.071	-0.05025	0.158	0.00093
YDL182W	LYS20		1.05792	0.022	1.01764	0.106	0.04686	0.022	0.00015	status=JK
YDL183C	YDL183C		0.92992	0.119	0.87641	0.02	0.04779	0.119	0.00058
YDL184C	RPL41A		1.14155	0.041	0.95973	0.087	0.19237	0.041	0.00044	status=JK
YDL185W	VMA1		1.06981	0.094	0.9777	0.039	0.08721	0.094	0.00019
YDL186W	YDL186W		0.79771	0.094	0.99766	0.022	-0.20613	0.094	0.00045
YDL187C	YDL187C		0.98625	0.177	1.05262	0.023	-0.073	0.176	0.00154
YDL188C	PPH22		1.06447	0.121	1.02038	0.009	0.04709	0.121	0.0004
YDL189W	RBS1		1.09918	0.097	1.04596	0.027	0.0578	0.097	0.00019
YDL190C	UFD2		1.06871	0.037	0.88302	0.041	0.18274	0.037	1e-05
YDL191W	RPL35A		0.80076	0.136	0.82566	0.064	-0.03729	0.136	0.00132
YDL192W	ARF1		0.65312	0.145	0.66094	0.025	-0.00248	0.144	0.00287
YDL194W	SNF3		1.05859	0.111	0.93064	0.012	0.12554	0.111	0.00031
YDL197C	ASF2		1.00979	0.19	0.97106	0.026	0.04106	0.19	0.00179
YDL199C	YDL199C		1.14454	0.089	1.02504	0.019	0.12086	0.089	0.00013
YDL200C	MGT1		1.09103	0.104	1.01589	0.017	0.07612	0.104	0.00024
YDL201W	TRM8		1.01891	0.15	1.04799	0.101	-0.04358	0.15	0.00086
YDL203C	ACK1		1.07831	0.009	1.11402	0.041	-0.04086	0.009	2e-05	status=JK
YDL204W	RTN2		0.99576	0.112	0.94233	0.002	0.05191	0.112	0.00039
YDL206W	YDL206W		1.00961	0.092	0.99872	0.011	0.00988	0.092	0.0002
YDL210W	UGA4		1.20339	0.028	1.18581	0.014	0.01095	0.028	0.00018	status=JK
YDL211C	YDL211C		1.179	0.112	1.07024	0.037	0.10967	0.112	0.00024
YDL213C	NOP6		0.98411	0.155	1.04418	0.054	-0.07285	0.154	0.00105
YDL214C	PRR2		0.87069	0.196	1.13819	0.049	-0.2693	0.195	0.003
YDL215C	GDH2		0.92048	0.032	0.91008	0.049	-0.00049	0.032	1e-05
YDL216C	RRI1		0.98755	0.017	0.94088	0.014	0.0433	0.017	0.0001	status=JK
YDL218W	YDL218W		0.81682	0.033	0.97306	0.057	-0.14282	0.033	0.00053	status=JK
YDL219W	DTD1		0.96588	0.109	0.95861	0.079	0.0119	0.109	0.00039
YDL222C	FMP45		1.08249	0.034	0.97811	0.011	0.1055	0.034	0.00033	status=JK
YDL223C	HBT1		1.04798	0.026	1.04649	0.071	0.00115	0.026	0.0002	status=JK
YDL224C	WHI4		1.08602	0.049	1.03841	0.066	0.05925	0.049	0.00068	status=JK
YDL226C	GCS1		1.02186	0.027	1.01035	0.007	0.01251	0.027	1e-05
YDL227C	HO		0.84762	0.245	0.89143	0.029	-0.04758	0.245	0.00619
YDL229W	SSB1		0.93138	0.03	0.85591	0.009	0.07494	0.03	0.00035	status=JK
YDL230W	PTP1		1.00826	0.015	0.94598	0.05	0.06247	0.015	0
YDL231C	BRE4		0.9049	0.08	0.97404	0.08	-0.06107	0.08	0.00019
YDL232W	OST4		0.62639	0.022	0.72413	0.004	-0.09725	0.022	0.0004	status=JK
YDL233W	MFG1		1.06447	0.18	1.08416	0.005	-0.02006	0.18	0.0013
YDL234C	GYP7		1.11829	0.128	0.95908	0.017	0.15251	0.128	0.00041
YDL236W	PHO13		0.92457	0.164	0.94907	0.017	-0.02875	0.164	0.0015
YDL237W	AIM6		1.01292	0.138	1.05208	0.054	-0.04343	0.137	0.00068
YDL238C	GUD1		1.16383	0.011	1.11873	0.043	0.03961	0.011	3e-05	status=JK
YDL239C	ADY3		0.92378	0.26	0.91104	0.057	0.01493	0.259	0.00572
YDL240W	LRG1		0.95204	0.023	0.95378	0.031	0.0005	0.023	0.00019	status=JK
YDL241W	YDL241W		1.09756	0.215	1.01935	0.024	0.06662	0.214	0.002
YDL242W	YDL242W		1.05282	0.062	1.08683	0.018	-0.03815	0.062	6e-05
YDL243C	AAD4		1.14348	0.022	1.10058	0.061	0.0423	0.022	0.00012	status=JK
YDR001C	NTH1		0.93838	0.05	0.9581	0.003	-0.02214	0.05	4e-05
YDR003W	RCR2		1.02076	0.107	1.04502	0.012	-0.02393	0.107	0.00032
YDR004W	RAD57		0.73451	0.224	0.82782	0.023	-0.1078	0.224	0.00721
YDR005C	MAF1		0.97595	0.094	1.01476	0.022	-0.04395	0.094	0.00025
YDR006C	SOK1		0.95165	0.019	0.92954	0.074	0.02134	0.019	0.00013	status=JK
YDR007W	TRP1		1.01039	0.213	1.00051	0.067	0.01419	0.213	0.00249
YDR008C	YDR008C		0.82039	0.145	1.09754	0.007	-0.27669	0.145	0.00148
YDR009W	GAL3		1.13981	0.138	1.04266	0.046	0.08643	0.138	0.00049
YDR010C	YDR010C		0.99889	0.367	1.22818	0.124	-0.205	0.366	0.01218
YDR011W	SNQ2		1.07753	0.081	0.99096	0.052	0.07469	0.08	0.00011
YDR014W	RAD61		0.90786	0.107	0.89159	0.074	0.01999	0.107	0.00045
YDR015C	YDR015C		0.9292	0.034	0.95767	0.068	-0.04153	0.034	0.00044	status=JK
YDR018C	YDR018C		1.09453	0.03	1.0612	0.051	0.02296	0.03	1e-05
YDR019C	GCV1		1.10722	0.193	1.07744	0.017	0.02483	0.192	0.00141
YDR020C	DAS2		1.11191	0.098	1.09142	0.031	0.01812	0.098	0.00019
YDR022C	ATG31		1.09593	0.142	1.10557	0.024	-0.01168	0.141	0.00059
YDR024W	YDR024W		0.69225	0.028	0.78783	0.012	-0.09019	0.028	0.00054	status=JK
YDR025W	RPS11A		0.85389	0.117	0.90307	0.184	-0.04009	0.117	0.0007
YDR026C	NSI1		0.97572	0.017	1.12415	0.083	-0.15009	0.017	0.0001	status=JK
YDR029W	YDR029W		1.0165	0.109	1.32475	0.042	-0.30054	0.109	0.00034
YDR030C	RAD28		1.13005	0.089	0.97017	0.171	0.14998	0.089	0.00013
YDR031W	MIC14		1.04817	0.078	1.02839	0.091	0.0141	0.078	0.00012
YDR032C	PST2		0.96165	0.097	0.89569	0.008	0.0639	0.097	0.00028
YDR033W	MRH1		1.11896	0.068	0.97237	0.045	0.13718	0.068	6e-05
YDR034C	LYS14		0.39166	0.016	0.32504	0.104	0.03288	0.015	0.00052	status=JK
YDR035W	ARO3		1.05954	0.098	0.92881	0.073	0.14158	0.098	0.00021
YDR036C	EHD3		1.00059	0.011	1.05525	0.139	-0.02129	0.011	4e-05	status=JK
YDR042C	YDR042C		1.01308	0.149	1.31338	0.014	-0.30193	0.149	0.00086
YDR043C	NRG1		0.88655	0.123	1.01758	0.184	-0.08437	0.123	0.00072
YDR046C	BAP3		1.03239	0.118	1.05241	0.176	-0.04899	0.117	0.0004
YDR048C	YDR048C		0.92167	0.139	1.06478	0.027	-0.14621	0.139	0.00093
YDR049W	VMS1		1.0526	0.178	0.95792	0.065	0.09715	0.178	0.00131
YDR051C	DET1		0.91871	0.078	0.89857	0.021	0.01905	0.078	0.00017
YDR055W	PST1		1.10149	0.023	1.07015	0.049	0.03624	0.023	0.00015	status=JK
YDR056C	YDR056C		0.99452	0.05	1.06292	0.019	-0.0638	0.05	0.00085	status=JK
YDR057W	YOS9		1.1684	0.14	1.15269	0.018	0.01605	0.14	0.00047
YDR058C	TGL2		1.00265	0.169	0.81199	0.073	0.16569	0.169	0.00128
YDR059C	UBC5		1.07651	0.075	1.22642	0.043	-0.1441	0.075	9e-05
YDR061W	YDR061W		1.06552	0.185	1.08736	0.028	-0.02524	0.185	0.0014
YDR063W	AIM7		1.12995	0.163	0.98323	0.023	0.13745	0.163	0.00081
YDR066C	RTR2		1.1306	0.161	1.16868	0.03	-0.04223	0.16	0.00077
YDR067C	OCA6		1.03689	0.089	0.99708	0.047	0.03446	0.088	0.00017
YDR068W	DOS2		1.02805	0.326	0.9886	0.104	0.04359	0.326	0.00808
YDR070C	FMP16		1.04622	0.067	0.96138	0.036	0.07556	0.067	0.00138	status=JK
YDR071C	PAA1		0.95927	0.087	0.67923	0.027	0.28185	0.087	0.00273	status=JK
YDR072C	IPT1		1.24647	0.026	1.02016	0.052	0.22915	0.026	0.00014	status=JK
YDR073W	SNF11		1.19082	0.235	1.21363	0.036	-0.01924	0.235	0.00206
YDR074W	TPS2		0.9774	0.114	0.94822	0.041	0.03143	0.114	0.00043
YDR075W	PPH3		1.0605	0.164	1.05657	0.017	0.00124	0.163	0.00099
YDR076W	RAD55		0.61147	0.181	0.65889	0.06	-0.05773	0.181	0.00664
YDR077W	SED1		1.00564	0.11	1.01056	0.026	-0.00869	0.11	0.00036
YDR080W	VPS41		0.70738	0.12	0.74106	0.051	-0.04186	0.12	0.00131
YDR083W	RRP8		0.67252	0.133	0.76929	0.011	-0.09559	0.132	0.00204
YDR084C	TVP23		1.07718	0.221	1.06023	0.008	0.0112	0.22	0.00228
YDR085C	AFR1		1.13314	0.1	1.1572	0.077	-0.03013	0.099	0.00019
YDR089W	YDR089W		1.07681	0.201	1.06106	0.043	0.01939	0.201	0.00174
YDR090C	YDR090C		1.12765	0.144	1.16462	0.022	-0.03463	0.144	0.00057
YDR092W	UBC13		0.85592	0.079	0.78087	0.007	0.07494	0.079	0.00022
YDR093W	DNF2		1.06383	0.128	1.01382	0.007	0.0509	0.127	0.00047
YDR094W	YDR094W		0.84806	0.262	0.83723	0.009	0.01191	0.261	0.00748
YDR095C	YDR095C		0.96078	0.028	1.03842	0.058	-0.08902	0.028	0.00028	status=JK
YDR096W	GIS1		1.16603	0.071	1.10523	0.03	0.05536	0.071	6e-05
YDR097C	MSH6		0.85172	0.058	0.85644	0.06	-0.01933	0.058	9e-05
YDR098C	GRX3		1.16204	0.082	1.10103	0.008	0.05974	0.082	0.0001
YDR099W	BMH2		0.86912	0.119	0.84493	0.011	0.02698	0.119	0.00069
YDR100W	TVP15		0.96855	0.197	1.04641	0.031	-0.08404	0.197	0.00225
YDR101C	ARX1		0.78726	0.095	0.79997	0.005	-0.01415	0.095	0.00047
YDR102C	YDR102C		0.97423	0.104	1.02694	0.003	-0.05354	0.104	0.00033
YDR103W	STE5		0.01451	0.012	0.00852	0.008	0.00699	0.012	0.08754
YDR104C	SPO71		1.08016	0.102	1.0476	0.056	0.02998	0.102	0.00023
YDR105C	TMS1		1.13384	0.123	1.05669	0.04	0.0796	0.122	0.00034
YDR107C	TMN2		0.96216	0.19	1.03428	0.024	-0.07743	0.19	0.00206
YDR108W	TRS85		0.97612	0.136	0.98674	0.043	-0.01147	0.136	0.00074
YDR109C	YDR109C		1.16297	0.08	1.25673	0.054	-0.07279	0.079	0.00156	status=JK
YDR110W	FOB1		1.06455	0.182	1.15365	0.101	-0.08577	0.182	0.00135
YDR111C	ALT2		0.98011	0.167	1.02181	0.076	-0.05675	0.167	0.00134
YDR112W	YDR112W		1.0256	0.104	1.05886	0.052	-0.0352	0.104	0.00029
YDR116C	MRPL1		0.85691	0.126	0.60627	0.012	0.25122	0.126	0.00087
YDR117C	TMA64		0.98246	0.098	1.03721	0.045	-0.06545	0.098	0.00027
YDR119W	VBA4		1.03589	0.298	1.01923	0.036	0.01384	0.297	0.00608
YDR120C	TRM1		0.88633	0.109	1.11865	0.037	-0.23714	0.109	0.00051
YDR121W	DPB4		1.0808	0.127	1.08168	0.005	-0.00542	0.126	0.00044
YDR122W	KIN1		1.1073	0.079	1.12317	0.002	-0.01751	0.079	0.0001
YDR123C	INO2		0.89515	0.026	0.7085	0.013	0.18583	0.026	0.00028	status=JK
YDR124W	YDR124W		1.16115	0.078	1.12388	0.026	0.02278	0.078	8e-05
YDR125C	ECM18		1.15193	0.04	1.00271	0.075	0.13373	0.04	0.00041	status=JK
YDR126W	SWF1		0.69533	0.041	0.77962	0.043	-0.07869	0.041	0.00116	status=JK
YDR127W	ARO1		0.99752	0.008	0.84824	0.034	0.14206	0.008	2e-05	status=JK
YDR128W	MTC5		0.75511	0.088	0.62952	0.027	0.12521	0.088	0.00043
YDR130C	FIN1		0.9957	0.084	1.0071	0.028	-0.01381	0.084	0.00016
YDR131C	YDR131C		1.00965	0.143	1.02703	0.011	-0.02208	0.143	0.00078
YDR132C	YDR132C		0.86033	0.161	0.90387	0.017	-0.04428	0.161	0.00175
YDR133C	YDR133C		1.11701	0.076	1.13175	0.058	-0.00222	0.076	9e-05
YDR134C	YDR134C		1.09318	0.096	1.02406	0.073	0.04958	0.096	0.00019
YDR135C	YCF1		1.11368	0.11	1.04154	0.087	0.07658	0.11	0.00026
YDR139C	RUB1		1.02486	0.161	0.93672	0.084	0.08271	0.16	0.00104
YDR142C	PEX7		1.05862	0.165	0.95702	0.024	0.099	0.164	0.00101
YDR143C	SAN1		1.22948	0.097	1.2687	0.074	-0.04001	0.096	0.00013
YDR144C	MKC7		0.83792	0.013	0.90131	0.043	-0.05622	0.013	8e-05	status=JK
YDR146C	SWI5		0.91421	0.047	1.08048	0.034	-0.16774	0.047	0.00087	status=JK
YDR147W	EKI1		0.97908	0.142	0.94966	0.032	0.01852	0.141	0.00082
YDR148C	KGD2		0.92249	0.191	0.90364	0.133	0.02176	0.191	0.00236
YDR149C	YDR149C		0.77205	0.044	0.90314	0.067	-0.12302	0.044	0.0011	status=JK
YDR150W	NUM1		0.91373	0.131	0.82664	0.126	0.07881	0.131	0.0008
YDR151C	CTH1		1.15511	0.044	1.03235	0.012	0.12434	0.044	0.00048	status=JK
YDR152W	GIR2		1.12612	0.091	1.1655	0.054	-0.04791	0.091	0.00015
YDR153C	ENT5		1.13489	0.015	1.02247	0.017	0.1052	0.015	6e-05	status=JK
YDR154C	YDR154C		1.19507	0.1	0.96722	0.073	0.23024	0.1	0.00234	status=JK
YDR155C	CPR1		1.12798	0.223	1.08201	0.052	0.04593	0.223	0.00206
YDR156W	RPA14		0.85175	0.074	0.94824	0.086	-0.10025	0.074	0.00018
YDR157W	YDR157W		1.06422	0.166	1.06526	0.086	0.01924	0.165	0.00102
YDR158W	HOM2		0.7599	0.042	0.83719	0.009	-0.08398	0.042	5e-05
YDR159W	SAC3		0.56717	0.137	0.52497	0.03	0.04371	0.137	0.00368
YDR161W	YDR161W		0.91883	0.111	0.80959	0.038	0.10978	0.11	0.00048
YDR162C	NBP2		0.7885	0.026	0.90041	0.037	-0.12071	0.026	0.00036	status=JK
YDR163W	CWC15		1.06985	0.087	1.16779	0.005	-0.10276	0.087	0.00015
YDR165W	TRM82		0.83437	0.094	0.89028	0.034	-0.04753	0.094	0.00039
YDR169C	STB3		1.10724	0.023	1.05529	0.123	0.05531	0.023	0.00015	status=JK
YDR171W	HSP42		0.9271	0.138	1.07896	0.095	-0.1585	0.137	0.00088
YDR173C	ARG82		0.34907	0.182	0.3765	0.005	-0.02619	0.182	0.03125
YDR174W	HMO1		0.66877	0.085	0.61395	0.113	0.05644	0.085	0.00057
YDR178W	SDH4		0.98888	0.017	0.98128	0.078	0.01861	0.017	0.0001	status=JK
YDR179C	CSN9		1.0777	0.012	1.0212	0.066	0.05216	0.012	4e-05	status=JK
YDR179W-A	YDR179W-A		1.08622	0.034	1.04362	0.077	0.04242	0.034	0.00033	status=JK
YDR181C	SAS4		1.0903	0.062	1.07297	0.035	0.02245	0.062	5e-05
YDR183W	PLP1		0.96925	0.173	0.93855	0.042	0.03039	0.173	0.00153
YDR184C	ATC1		0.83898	0.09	0.85749	0.039	-0.02629	0.09	0.00034
YDR185C	UPS3		1.09696	0.036	1.00392	0.014	0.09303	0.036	0.00037	status=JK
YDR186C	YDR186C		0.92319	0.143	1.02567	0.029	-0.10776	0.142	0.001
YDR191W	HST4		0.69637	0.113	0.71151	0.02	-0.01077	0.113	0.00115
YDR192C	NUP42		1.07027	0.077	1.09142	0.067	-0.01911	0.077	0.0001
YDR193W	YDR193W		1.00036	0.081	1.01336	0.006	-0.01357	0.081	0.00015
YDR198C	RKM2		1.06715	0.117	1.07448	0.018	-0.0101	0.117	0.00036
YDR199W	YDR199W		1.1486	0.085	1.14961	0.031	0.00169	0.085	0.00011
YDR202C	RAV2		1.04092	0.149	0.88978	0.052	0.15078	0.149	0.00079
YDR203W	YDR203W		0.94269	0.102	0.99886	0.021	-0.05561	0.102	0.00034
YDR205W	MSC2		1.02271	0.14	0.93306	0.08	0.08369	0.14	0.0007
YDR206W	EBS1		0.89746	0.042	1.04494	0.006	-0.1464	0.042	3e-05
YDR207C	UME6		0.60269	0.105	0.62075	0.026	-0.01941	0.105	0.00141
YDR209C	YDR209C		1.09388	0.167	0.98426	0.032	0.11663	0.167	0.00096
YDR210W	YDR210W		1.10986	0.141	1.13318	0.01	-0.02499	0.14	0.00055
YDR213W	UPC2		1.05063	0.119	0.99118	0.039	0.06253	0.119	0.0004
YDR214W	AHA1		1.25017	0.056	1.10262	0.006	0.1457	0.056	3e-05
YDR215C	YDR215C		1.09553	0.135	1.18651	0.038	-0.09095	0.135	0.00051
YDR216W	ADR1		1.02824	0.052	1.02843	0.018	0.00176	0.052	4e-05
YDR217C	RAD9		0.87988	0.121	1.02716	0.021	-0.16033	0.121	0.0007
YDR218C	SPR28		0.959	0.089	0.97869	0.049	-0.02778	0.089	0.00022
YDR219C	MFB1		0.94659	0.07	0.88764	0.053	0.06849	0.07	0.00011
YDR220C	YDR220C		1.07845	0.091	1.09651	0.032	-0.02083	0.091	0.00017
YDR221W	GTB1		1.09384	0.125	1.11636	0.025	-0.01799	0.124	0.0004
YDR222W	YDR222W		1.06409	0.112	1.00507	0.055	0.06267	0.112	0.00032
YDR223W	CRF1		1.10411	0.007	1.05025	0.059	0.07124	0.007	2e-05	status=JK
YDR225W	HTA1		0.81763	0.098	0.85212	0.016	-0.03122	0.098	0.00047
YDR227W	SIR4		0.00155	0.003	0	0	0.00155	0.003	0.42265	status=JK
YDR229W	IVY1		1.08205	0.089	1.06661	0.038	0.00442	0.089	0.00015
YDR233C	RTN1		0.99823	0.086	1.03359	0.04	-0.03036	0.086	0.00247	status=JK
YDR234W	LYS4		0.38474	0.054	0.33621	0.003	0.0493	0.054	0.00074
YDR239C	YDR239C		1.03772	0.198	0.97386	0.058	0.0662	0.198	0.00185
YDR241W	YDR241W		0.73002	0.169	0.81404	0.049	-0.08019	0.169	0.00328
YDR242W	AMD2		0.99886	0.109	0.95335	0.284	-0.02261	0.108	0.00035
YDR244W	PEX5		0.88911	0.089	0.80834	0.098	0.06444	0.089	0.00028
YDR245W	MNN10		0.94006	0.005	0.97221	0.064	-0.04643	0.005	1e-05	status=JK
YDR247W	VHS1		0.98298	0.135	1.00872	0.071	-0.03209	0.135	0.00071
YDR248C	YDR248C		1.15057	0.091	1.09776	0.013	0.04512	0.091	0.00014
YDR249C	YDR249C		0.79313	0.032	1.07093	0.03	-0.28571	0.032	0.00055	status=JK
YDR250C	YDR250C		1.04862	0.008	1.06835	0.007	-0.0244	0.008	2e-05	status=JK
YDR251W	PAM1		1.10258	0.096	1.04112	0.04	0.05908	0.096	0.00018
YDR252W	BTT1		1.03863	0.13	1.08432	0.019	-0.04388	0.13	0.00054
YDR253C	MET32		1.02474	0.136	0.8699	0.053	0.14259	0.136	0.00063
YDR254W	CHL4		1.01993	0.315	1.04582	0.085	-0.0357	0.314	0.00744
YDR255C	RMD5		1.06865	0.125	1.04902	0.043	0.02032	0.124	0.00043
YDR256C	CTA1		1.16471	0.042	1.09725	0.05	0.05501	0.042	1e-05
YDR257C	RKM4		1.05218	0.058	0.92836	0.007	0.12453	0.058	5e-05
YDR258C	HSP78		0.97037	0.089	1.05057	0.057	-0.08616	0.089	0.00021
YDR259C	YAP6		1.03211	0.426	1.09973	0.123	-0.09891	0.425	0.01678
YDR260C	SWM1		0.99891	0.11	1.02732	0.098	-0.01368	0.109	0.00036
YDR261C	EXG2		0.87023	0.175	1.00277	0.024	-0.14678	0.175	0.00216
YDR262W	YDR262W		0.91607	0.179	1.05436	0.045	-0.13428	0.179	0.00199
YDR263C	DIN7		0.95623	0.088	0.91192	0.028	0.03821	0.088	0.00021
YDR265W	PEX10		0.9549	0.078	0.93032	0.07	0.01631	0.078	0.00015
YDR266C	HEL2		0.92243	0.056	1.05016	0.057	-0.13245	0.056	0.00122	status=JK
YDR269C	YDR269C		1.1894	0.074	1.06978	0.178	0.13599	0.074	7e-05
YDR270W	CCC2		1.15899	0.091	1.09033	0.015	0.07078	0.091	0.00013
YDR271C	YDR271C		1.01334	0.131	1.04254	0.18	-0.09456	0.131	0.00059
YDR272W	GLO2		1.01658	0.046	1.00018	0.011	0.01594	0.046	3e-05
YDR273W	DON1		1.06376	0.166	1.04807	0.06	0.01646	0.165	0.00102
YDR274C	YDR274C		1.06359	0.035	1.07773	0.061	-0.01527	0.035	0.00035	status=JK
YDR275W	BSC2		1.09207	0.005	1.06295	0.009	0.02455	0.005	1e-05	status=JK
YDR276C	PMP3		1.12348	0.181	0.80646	0.017	0.31033	0.181	0.00113
YDR277C	MTH1		1.07235	0.079	1.01065	0.07	0.0732	0.078	0.00011
YDR278C	YDR278C		0.70908	0.02	0.71964	0.04	-0.00997	0.02	0.00027	status=JK
YDR279W	RNH202		0.86632	0.012	0.88376	0.078	-0.04168	0.012	7e-05	status=JK
YDR281C	PHM6		1.10743	0.117	1.01164	0.024	0.08851	0.117	0.00032
YDR282C	YDR282C		1.07235	0.154	1.13203	0.021	-0.06173	0.154	0.0008
YDR284C	DPP1		1.04643	0.1	0.97578	0.024	0.07414	0.1	0.00024
YDR285W	ZIP1		1.00577	0.203	1.07291	0.041	-0.06959	0.203	0.00219
YDR286C	YDR286C		0.89946	0.116	0.96856	0.063	-0.07468	0.116	0.00059
YDR287W	INM2		0.88499	0.178	1.02264	0.038	-0.12782	0.178	0.00217
YDR289C	RTT103		0.61526	0.028	0.68406	0.066	-0.07964	0.028	0.00067	status=JK
YDR290W	YDR290W		0.59999	0.135	0.682	0.23	-0.05765	0.135	0.00303
YDR291W	HRQ1		0.97684	0.034	1.0442	0.012	-0.07457	0.034	0.00041	status=JK
YDR293C	SSD1		1.4133	0.177	1.18512	0.036	0.22271	0.177	0.00053
YDR294C	DPL1		0.89566	0.021	1.03927	0.089	-0.15697	0.021	0.00018	status=JK
YDR297W	SUR2		0.92958	0.128	0.84517	0.055	0.0741	0.127	0.0007
YDR304C	CPR5		0.8695	0.28	0.99493	0.079	-0.14316	0.279	0.00839
YDR305C	HNT2		1.13562	0.017	0.98272	0.072	0.14348	0.017	8e-05	status=JK
YDR306C	YDR306C		0.71588	0.063	0.91136	0.031	-0.19793	0.062	0.00254	status=JK
YDR307W	PMT7		0.9652	0.271	0.95029	0.069	0.03124	0.271	0.00572
YDR309C	GIC2		0.97145	0.013	0.9732	0.036	0.00038	0.013	6e-05	status=JK
YDR310C	SUM1		0.98089	0.068	1.06025	0.095	-0.09586	0.068	9e-05
YDR312W	SSF2		1.10932	0.014	1.10341	0.026	0.00684	0.014	5e-05	status=JK
YDR313C	PIB1		0.98894	0.2	1.00038	0.023	-0.00898	0.2	0.0022
YDR314C	RAD34		1.07334	0.059	1.12961	0.091	-0.07682	0.059	5e-05
YDR315C	IPK1		0.87796	0.137	0.96763	0.01	-0.09024	0.137	0.00102
YDR316W	OMS1		1.01887	0.013	0.86572	0.027	0.15368	0.013	5e-05	status=JK
YDR317W	HIM1		0.71874	0.237	1.08172	0.041	-0.36712	0.237	0.00899
YDR318W	MCM21		0.91596	0.119	0.91307	0.024	0.00609	0.119	0.0006
YDR319C	YFT2		1.10318	0.066	0.9751	0.046	0.11198	0.066	6e-05
YDR320C	SWA2		0.93208	0.025	0.89575	0.034	0.04041	0.025	0.00024	status=JK
YDR321W	ASP1		1.04558	0.077	1.11913	0.101	-0.08126	0.077	0.00011
YDR326C	YSP2		1.09393	0.124	1.11704	0.186	0.00976	0.124	0.0004
YDR329C	PEX3		0.95154	0.008	0.88849	0.034	0.05711	0.008	2e-05	status=JK
YDR330W	UBX5		1.22047	0.102	1.15851	0.02	0.05862	0.102	0.00016
YDR332W	IRC3		0.94576	0.179	0.97349	0.02	-0.02794	0.179	0.00181
YDR333C	YDR333C		1.11327	0.116	1.05171	0.023	0.05625	0.116	0.00031
YDR334W	SWR1		0.88482	0.081	0.7599	0.07	0.10387	0.081	0.00021
YDR335W	MSN5		0.78279	0.049	0.85317	0.06	-0.07499	0.049	7e-05
YDR336W	YDR336W		0.86548	0.175	0.74119	0.044	0.12678	0.175	0.00222
YDR338C	YDR338C		1.04928	0.057	1.03107	0.01	0.01985	0.057	0.00099	status=JK
YDR340W	YDR340W		0.95802	0.205	1.07934	0.074	-0.12345	0.205	0.0026
YDR344C	YDR344C		1.13366	0.032	0.97772	0.007	0.15182	0.032	0.00026	status=JK
YDR345C	HXT3		0.97475	0.073	0.96136	0.041	-0.00087	0.073	0.00012
YDR346C	SVF1		1.05571	0.067	0.99061	0.02	0.06088	0.067	7e-05
YDR348C	PAL1		0.78695	0.087	0.87117	0.022	-0.08612	0.087	0.00037
YDR349C	YPS7		1.00721	0.01	1.06399	0.032	-0.05801	0.01	3e-05	status=JK
YDR351W	SBE2		1.04249	0.061	0.93965	0.04	0.1023	0.061	6e-05
YDR352W	YPQ2		1.07059	0.151	1.17176	0.095	-0.08219	0.151	0.00076
YDR354W	TRP4		0.98074	0.034	0.93038	0.043	0.04785	0.034	1e-05
YDR357C	CNL1		0.99383	0.026	0.9477	0.037	0.04771	0.026	0.00023	status=JK
YDR358W	GGA1		1.1195	0.097	1.08469	0.01	0.03217	0.097	0.00018
YDR359C	EAF1		0.08244	0.033	0.2695	0.049	-0.18902	0.033	0.04842	status=JK
YDR360W	YDR360W		0.95076	0.134	0.92615	0.008	0.02623	0.133	0.00075
YDR363W	ESC2		0.84304	0.031	0.90483	0.043	-0.06864	0.031	1e-05
YDR363W-A	SEM1		1.00661	0.181	1.02168	0.036	-0.02372	0.18	0.00155
YDR368W	YPR1		1.09709	0.029	0.89729	0.065	0.1887	0.029	0.00023	status=JK
YDR369C	XRS2		1.08896	0.065	1.12737	0.021	-0.04738	0.065	6e-05
YDR370C	YDR370C		1.00233	0.04	1.03287	0.021	-0.02903	0.04	2e-05
YDR371W	CTS2		1.10245	0.055	1.03155	0.05	0.07219	0.055	0.00084	status=JK
YDR372C	VPS74		1.02343	0.007	0.98901	0.031	0.03985	0.007	2e-05	status=JK
YDR374C	YDR374C		1.07289	0.031	1.04183	0.057	0.02488	0.031	0.00028	status=JK
YDR375C	BCS1		0.94384	0.126	0.59467	0.103	0.35984	0.125	0.00064
YDR378C	LSM6		0.36743	0.071	0.5398	0.055	-0.16986	0.071	0.00195
YDR379W	RGA2		1.00753	0.068	1.03577	0.007	-0.03103	0.068	9e-05
YDR380W	ARO10		0.94905	0.162	0.92268	0.036	0.0322	0.162	0.00134
YDR382W	RPP2B		0.91006	0.088	1.03866	0.135	-0.14607	0.087	0.00024
YDR383C	NKP1		0.71684	0.13	0.75697	0.039	-0.04111	0.13	0.00159
YDR384C	ATO3		1.11377	0.065	0.96398	0.094	0.14044	0.064	5e-05
YDR385W	EFT2		1.05891	0.149	1.00061	0.097	0.0458	0.149	0.00075
YDR386W	MUS81		1.02685	0.015	0.93564	0.049	0.09121	0.015	0
YDR387C	YDR387C		1.0682	0.079	1.11202	0.024	-0.04716	0.079	0.00011
YDR388W	RVS167		0.98851	0.027	0.49907	0.007	0.48747	0.027	0.00025	status=JK
YDR389W	SAC7		0.73742	0.117	0.92786	0.038	-0.1785	0.116	0.00106
YDR391C	YDR391C		1.12119	0.063	1.07866	0.038	0.03094	0.063	5e-05
YDR392W	SPT3		0.75166	0.064	0.71984	0.007	0.02934	0.064	0.00017
YDR393W	SHE9		0.81776	0.086	0.7843	0.01	0.02934	0.085	0.00031
YDR395W	SXM1		1.22188	0.061	1.10726	0.03	0.11575	0.061	0.00083	status=JK
YDR399W	HPT1		0.94738	0.043	0.9381	0.043	0.01849	0.043	0.00069	status=JK
YDR400W	URH1		0.9673	0.113	0.95827	0.075	0.01494	0.113	0.00043
YDR401W	YDR401W		1.03463	0.061	1.09255	0.117	-0.02868	0.061	6e-05
YDR402C	DIT2		1.10722	0.139	1.09438	0.009	0.01198	0.139	0.00054
YDR403W	DIT1		1.21254	0.015	1.06739	0.026	0.14997	0.015	5e-05	status=JK
YDR406W	PDR15		1.08128	0.078	1.07308	0.01	0.01126	0.078	0.0001
YDR408C	ADE8		1.08061	0.086	1.05688	0.033	0.02358	0.085	0.00014
YDR409W	SIZ1		1.00246	0.117	0.96047	0.005	0.04316	0.117	0.00044
YDR410C	STE14		0	0	0	0	0	0	#NUM!	status=JK
YDR411C	DFM1		1.1616	0.033	1.07572	0.012	0.08236	0.033	0.00028	status=JK
YDR414C	ERD1		0.93835	0.038	0.90019	0.006	0.03738	0.038	0.00054	status=JK
YDR415C	YDR415C		1.06141	0.042	1.11673	0.025	-0.0697	0.042	0.00053	status=JK
YDR419W	RAD30		0.76995	0.004	0.99213	0.047	-0.22289	0.004	1e-05	status=JK
YDR420W	HKR1		0.98537	0.244	0.82795	0.047	0.17098	0.243	0.00396
YDR421W	ARO80		0.88534	0.045	0.92324	0.103	-0.03558	0.045	4e-05
YDR422C	SIP1		1.07696	0.183	0.95092	0.051	0.12491	0.182	0.00131
YDR423C	CAD1		0.93121	0.211	0.97491	0.04	-0.04166	0.211	0.00306
YDR424C	DYN2		0.76912	0.014	0.96489	0.042	-0.19516	0.014	0.00011	status=JK
YDR425W	SNX41		0.87183	0.16	0.86892	0.007	0.00703	0.16	0.00167
YDR426C	YDR426C		0.94408	0.124	0.89629	0.031	0.04359	0.123	0.00061
YDR428C	BNA7		1.08815	0.108	0.99491	0.044	0.09031	0.108	0.00027
YDR430C	CYM1		1.15939	0.036	1.14953	0.014	0.01154	0.035	0.00031	status=JK
YDR431W	YDR431W		0.92708	0.084	0.82419	0.004	0.10239	0.084	0.00021
YDR435C	PPM1		1.06877	0.063	1.19054	0.032	-0.12457	0.063	6e-05
YDR436W	PPZ2		1.14049	0.11	1.16441	0.093	-0.0253	0.11	0.00025
YDR438W	THI74		1.02949	0.108	0.96315	0.031	0.07232	0.108	0.00031
YDR439W	LRS4		1.06534	0.23	1.18549	0.046	-0.12443	0.23	0.00268
YDR440W	DOT1		0.99418	0.052	1.02026	0.013	-0.01797	0.052	4e-05
YDR441C	APT2		0.89596	0.081	0.95948	0.08	-0.07549	0.081	0.0002
YDR444W	YDR444W		1.11038	0.146	0.9438	0.035	0.15885	0.146	0.00062
YDR445C	YDR445C		0.9795	0.17	1.0152	0.027	-0.02903	0.17	0.00141
YDR446W	ECM11		0.9641	0.026	1.00934	0.004	-0.04422	0.026	0.00024	status=JK
YDR447C	RPS17B		1.03959	0.04	1.07251	0.015	-0.02623	0.04	2e-05
YDR451C	YHP1		1.02724	0.065	0.97974	0.011	0.04786	0.065	7e-05
YDR452W	PPN1		1.16396	0.11	1.16812	0.01	-0.00288	0.11	0.00023
YDR453C	TSA2		1.0091	0.122	0.95764	0.07	0.0331	0.121	0.00048
YDR455C	YDR455C		0.99757	0.046	0.90773	0.001	0.09241	0.046	3e-05
YDR458C	HEH2		1.03644	0.011	1.0699	0.047	-0.0386	0.011	4e-05	status=JK
YDR459C	PFA5		0.9821	0.074	0.90973	0.037	0.08268	0.074	0.00012
YDR461W	MFA1		0.77741	0.095	0.92567	0.074	-0.11392	0.095	0.00494	status=JK
YDR463W	STP1		1.04325	0.109	1.01203	0.038	0.02784	0.109	0.00031
YDR465C	RMT2		1.11243	0.24	1.14825	0.012	-0.03829	0.24	0.00267
YDR466W	PKH3		1.00202	0.129	0.98207	0.017	0.02005	0.129	0.00058
YDR467C	YDR467C		1.15574	0.138	1.11481	0.06	0.05043	0.138	0.00046
YDR469W	SDC1		0.94053	0.071	0.90711	0.016	0.03082	0.07	0.00012
YDR471W	RPL27B		0.76048	0.027	0.85864	0.008	-0.09168	0.027	1e-05
YDR474C	YDR474C		1.06497	0.081	1.04068	0.026	0.0239	0.081	0.00012
YDR475C	JIP4		0.86453	0.014	0.94458	0.014	-0.07247	0.014	9e-05	status=JK
YDR476C	YDR476C		0.90941	0.018	0.99683	0.022	-0.08287	0.018	0.00013	status=JK
YDR477W	SNF1		0.74343	0.009	0.88091	0.17	-0.11973	0.008	4e-05	status=JK
YDR479C	PEX29		0.93038	0.157	0.98732	0.025	-0.05034	0.157	0.00129
YDR480W	DIG2		1.11371	0.057	1.16525	0.059	-0.05422	0.057	4e-05
YDR481C	PHO8		0.95865	0.205	1.03618	0.052	-0.07943	0.205	0.0026
YDR482C	CWC21		0.91199	0.313	1.0902	0.01	-0.17572	0.312	0.01004
YDR483W	KRE2		1.02263	0.064	0.9454	0.052	0.08666	0.064	7e-05
YDR483W	KRE2		1.0397	0.149	1.00591	0.065	0.03902	0.148	0.00079
YDR485C	VPS72		0.89469	0.027	0.77954	0.048	0.11302	0.027	0.00031	status=JK
YDR486C	VPS60		0.87552	0.054	0.92723	0.003	-0.04938	0.054	6e-05
YDR488C	PAC11		0.95843	0.02	0.94667	0.018	0.0181	0.02	0.00015	status=JK
YDR490C	PKH1		1.11021	0.016	1.18886	0.039	-0.06986	0.016	7e-05	status=JK
YDR491C	YDR491C		0.94934	0.086	1.02264	0.046	-0.07507	0.086	0.00021
YDR492W	IZH1		1.16718	0.019	1.09899	0.051	0.06216	0.019	9e-05	status=JK
YDR493W	MZM1		1.01354	0.063	1.08086	0.061	-0.08063	0.063	7e-05
YDR494W	RSM28		1.13634	0.109	1.13583	0.024	-0.0024	0.109	0.00024
YDR496C	PUF6		0.64204	0.022	0.78838	0.055	-0.15911	0.022	0.00038	status=JK
YDR497C	ITR1		1.16873	0.045	1.07071	0.045	0.10027	0.045	0.00049	status=JK
YDR500C	RPL37B		0.00101	0.002	0	0	0.00101	0.002	0.42265	status=JK
YDR501W	PLM2		1.25604	0.098	1.2072	0.056	0.04001	0.097	0.00013
YDR502C	SAM2		1.07257	0.087	1.03936	0.169	0.07355	0.086	0.00014
YDR503C	LPP1		1.08994	0.093	1.07952	0.007	0.01113	0.092	0.00017
YDR504C	SPG3		1.07939	0.094	1.12898	0.016	-0.04769	0.094	0.00018
YDR505C	PSP1		0.90526	0.075	0.91482	0.051	-0.0179	0.075	0.00015
YDR506C	GMC1		0.93453	0.143	0.91021	0.037	0.0256	0.143	0.00097
YDR508C	GNP1		0.89255	0.142	1.06542	0.111	-0.18169	0.141	0.00108
YDR509W	YDR509W		0.95809	0.019	0.98179	0.035	-0.02915	0.019	0.00013	status=JK
YDR511W	ACN9		0.95877	0.125	1.0276	0.053	-0.07487	0.124	0.0006
YDR512C	EMI1		0.82417	0.036	0.64448	0.011	0.17912	0.036	0.00065	status=JK
YDR513W	GRX2		1.01664	0.12	1.00948	0.026	0.01332	0.119	0.00044
YDR514C	YDR514C		0.16918	0.139	0.74994	0.136	-0.60583	0.139	0.093
YDR515W	SLF1		1.05018	0.106	1.02111	0.053	0.02688	0.106	0.00028
YDR516C	EMI2		1.10775	0.133	1.12404	0.084	-0.00226	0.133	0.00047
YDR517W	GRH1		1.11779	0.075	1.06372	0.055	0.0455	0.075	8e-05
YDR519W	FPR2		1.03649	0.055	1.05534	0.091	0.01155	0.055	4e-05
YDR520C	URC2		1.06264	0.185	1.05153	0.134	-0.00473	0.185	0.00141
YDR522C	SPS2		0.76618	0.197	0.935	0.074	-0.16276	0.197	0.00444
YDR524C	AGE1		0.71067	0.202	0.95031	0.011	-0.24111	0.201	0.00587
YDR525W	YDR525W		0.93743	0.105	1.07365	0.02	-0.13178	0.105	0.00038
YDR525W-A	SNA2		1.03144	0.135	0.96687	0.027	0.06823	0.135	0.00061
YDR528W	HLR1		1.05534	0.071	1.00192	0.064	0.04472	0.071	0.00151	status=JK
YDR530C	APA2		1.04486	0.123	1.02673	0.016	0.02278	0.122	0.00044
YDR532C	KRE28		0.11085	0.09	0.14509	0.02	-0.03073	0.089	0.08982
YDR533C	HSP31		0.9996	0.219	0.89456	0.048	0.10094	0.219	0.00279
YDR534C	FIT1		1.01142	0.126	1.06423	0.036	-0.04785	0.126	0.00052
YDR535C	YDR535C		1.06195	0.021	1.04145	0.003	0.02352	0.021	0.00013	status=JK
YDR536W	STL1		0.93056	0.08	1.04186	0.067	-0.10922	0.08	0.00018
YDR537C	YDR537C		1.01054	0.196	0.97407	0.034	0.05549	0.196	0.00195
YDR538W	PAD1		0.57197	0.193	0.52949	0.036	0.04975	0.193	0.00962
YDR539W	FDC1		1.00232	0.106	0.91024	0.049	0.09426	0.106	0.00032
YDR540C	IRC4		1.14403	0.05	1.03945	0.062	0.1091	0.05	0.00065	status=JK
YDR541C	YDR541C		1.07246	0.183	0.95601	0.074	0.13355	0.183	0.00133
YEL001C	IRC22		#NUM!	#NUM!	#NUM!	#NUM!	#NUM!	#NUM!	#NUM!	status=LK
YEL003W	GIM4		#NUM!	#NUM!	#NUM!	#NUM!	#NUM!	#NUM!	#NUM!	status=LK
YEL004W	YEA4		#NUM!	#NUM!	#NUM!	#NUM!	#NUM!	#NUM!	#NUM!	status=LK
YEL005C	VAB2		#NUM!	#NUM!	#NUM!	#NUM!	#NUM!	#NUM!	#NUM!	status=LK
YEL006W	YEA6		#NUM!	#NUM!	#NUM!	#NUM!	#NUM!	#NUM!	#NUM!	status=LK
YEL007W	MIT1		#NUM!	#NUM!	#NUM!	#NUM!	#NUM!	#NUM!	#NUM!	status=LK
YEL008W	YEL008W		#NUM!	#NUM!	#NUM!	#NUM!	#NUM!	#NUM!	#NUM!	status=LK
YEL010W	YEL010W		#NUM!	#NUM!	#NUM!	#NUM!	#NUM!	#NUM!	#NUM!	status=LK
YEL011W	GLC3		#NUM!	#NUM!	#NUM!	#NUM!	#NUM!	#NUM!	#NUM!	status=LK
YEL012W	UBC8		#NUM!	#NUM!	#NUM!	#NUM!	#NUM!	#NUM!	#NUM!	status=LK
YEL013W	VAC8		#NUM!	#NUM!	#NUM!	#NUM!	#NUM!	#NUM!	#NUM!	status=LK
YEL014C	YEL014C		#NUM!	#NUM!	#NUM!	#NUM!	#NUM!	#NUM!	#NUM!	status=LK
YEL015W	EDC3		#NUM!	#NUM!	#NUM!	#NUM!	#NUM!	#NUM!	#NUM!	status=LK
YEL016C	NPP2		#NUM!	#NUM!	#NUM!	#NUM!	#NUM!	#NUM!	#NUM!	status=LK
YEL017C-A	PMP2		#NUM!	#NUM!	#NUM!	#NUM!	#NUM!	#NUM!	#NUM!	status=LK
YEL017W	GTT3		#NUM!	#NUM!	#NUM!	#NUM!	#NUM!	#NUM!	#NUM!	status=LK
YEL020C	YEL020C		#NUM!	#NUM!	#NUM!	#NUM!	#NUM!	#NUM!	#NUM!	status=LK
YEL023C	YEL023C		#NUM!	#NUM!	#NUM!	#NUM!	#NUM!	#NUM!	#NUM!	status=LK
YEL025C	YEL025C		#NUM!	#NUM!	#NUM!	#NUM!	#NUM!	#NUM!	#NUM!	status=LK
YEL028W	YEL028W		#NUM!	#NUM!	#NUM!	#NUM!	#NUM!	#NUM!	#NUM!	status=LK
YEL030W	ECM10		#NUM!	#NUM!	#NUM!	#NUM!	#NUM!	#NUM!	#NUM!	status=LK
YEL031W	SPF1		#NUM!	#NUM!	#NUM!	#NUM!	#NUM!	#NUM!	#NUM!	status=LK
YEL033W	MTC7		#NUM!	#NUM!	#NUM!	#NUM!	#NUM!	#NUM!	#NUM!	status=LK
YEL037C	RAD23		#NUM!	#NUM!	#NUM!	#NUM!	#NUM!	#NUM!	#NUM!	status=LK
YEL038W	UTR4		#NUM!	#NUM!	#NUM!	#NUM!	#NUM!	#NUM!	#NUM!	status=LK
YEL039C	CYC7		#NUM!	#NUM!	#NUM!	#NUM!	#NUM!	#NUM!	#NUM!	status=LK
YEL040W	UTR2		#NUM!	#NUM!	#NUM!	#NUM!	#NUM!	#NUM!	#NUM!	status=LK
YEL041W	YEF1		#NUM!	#NUM!	#NUM!	#NUM!	#NUM!	#NUM!	#NUM!	status=LK
YEL042W	GDA1		#NUM!	#NUM!	#NUM!	#NUM!	#NUM!	#NUM!	#NUM!	status=LK
YEL043W	YEL043W		#NUM!	#NUM!	#NUM!	#NUM!	#NUM!	#NUM!	#NUM!	status=LK
YEL047C	FRD1		#NUM!	#NUM!	#NUM!	#NUM!	#NUM!	#NUM!	#NUM!	status=LK
YEL048C	TCA17		#NUM!	#NUM!	#NUM!	#NUM!	#NUM!	#NUM!	#NUM!	status=LK
YEL049W	PAU2		#NUM!	#NUM!	#NUM!	#NUM!	#NUM!	#NUM!	#NUM!	status=LK
YEL052W	AFG1		#NUM!	#NUM!	#NUM!	#NUM!	#NUM!	#NUM!	#NUM!	status=LK
YEL053C	MAK10		#NUM!	#NUM!	#NUM!	#NUM!	#NUM!	#NUM!	#NUM!	status=LK
YEL056W	HAT2		#NUM!	#NUM!	#NUM!	#NUM!	#NUM!	#NUM!	#NUM!	status=LK
YEL057C	YEL057C		#NUM!	#NUM!	#NUM!	#NUM!	#NUM!	#NUM!	#NUM!	status=LK
YEL059W	YEL059W		#NUM!	#NUM!	#NUM!	#NUM!	#NUM!	#NUM!	#NUM!	status=LK
YEL060C	PRB1		#NUM!	#NUM!	#NUM!	#NUM!	#NUM!	#NUM!	#NUM!	status=LK
YEL061C	CIN8		#NUM!	#NUM!	#NUM!	#NUM!	#NUM!	#NUM!	#NUM!	status=LK
YEL062W	NPR2		#NUM!	#NUM!	#NUM!	#NUM!	#NUM!	#NUM!	#NUM!	status=LK
YEL063C	CAN1		#NUM!	#NUM!	#NUM!	#NUM!	#NUM!	#NUM!	#NUM!	status=LK
YEL064C	AVT2		#NUM!	#NUM!	#NUM!	#NUM!	#NUM!	#NUM!	#NUM!	status=LK
YEL065W	SIT1		#NUM!	#NUM!	#NUM!	#NUM!	#NUM!	#NUM!	#NUM!	status=LK
YEL066W	HPA3		#NUM!	#NUM!	#NUM!	#NUM!	#NUM!	#NUM!	#NUM!	status=LK
YEL067C	YEL067C		#NUM!	#NUM!	#NUM!	#NUM!	#NUM!	#NUM!	#NUM!	status=LK
YEL068C	YEL068C		#NUM!	#NUM!	#NUM!	#NUM!	#NUM!	#NUM!	#NUM!	status=LK
YEL071W	DLD3		#NUM!	#NUM!	#NUM!	#NUM!	#NUM!	#NUM!	#NUM!	status=LK
YER001W	MNN1		#NUM!	#NUM!	#NUM!	#NUM!	#NUM!	#NUM!	#NUM!	status=LK
YER002W	NOP16		#NUM!	#NUM!	#NUM!	#NUM!	#NUM!	#NUM!	#NUM!	status=LK
YER004W	FMP52		#NUM!	#NUM!	#NUM!	#NUM!	#NUM!	#NUM!	#NUM!	status=LK
YER005W	YND1		#NUM!	#NUM!	#NUM!	#NUM!	#NUM!	#NUM!	#NUM!	status=LK
YER007C-A	TMA20		#NUM!	#NUM!	#NUM!	#NUM!	#NUM!	#NUM!	#NUM!	status=LK
YER007W	PAC2		#NUM!	#NUM!	#NUM!	#NUM!	#NUM!	#NUM!	#NUM!	status=LK
YER010C	YER010C		#NUM!	#NUM!	#NUM!	#NUM!	#NUM!	#NUM!	#NUM!	status=LK
YER011W	TIR1		#NUM!	#NUM!	#NUM!	#NUM!	#NUM!	#NUM!	#NUM!	status=LK
YER016W	BIM1		#NUM!	#NUM!	#NUM!	#NUM!	#NUM!	#NUM!	#NUM!	status=LK
YER019C-A	SBH2		#NUM!	#NUM!	#NUM!	#NUM!	#NUM!	#NUM!	#NUM!	status=LK
YER019W	ISC1		#NUM!	#NUM!	#NUM!	#NUM!	#NUM!	#NUM!	#NUM!	status=LK
YER020W	GPA2		#NUM!	#NUM!	#NUM!	#NUM!	#NUM!	#NUM!	#NUM!	status=LK
YER024W	YAT2		#NUM!	#NUM!	#NUM!	#NUM!	#NUM!	#NUM!	#NUM!	status=LK
YER027C	GAL83		#NUM!	#NUM!	#NUM!	#NUM!	#NUM!	#NUM!	#NUM!	status=LK
YER028C	MIG3		#NUM!	#NUM!	#NUM!	#NUM!	#NUM!	#NUM!	#NUM!	status=LK
YER030W	CHZ1		#NUM!	#NUM!	#NUM!	#NUM!	#NUM!	#NUM!	#NUM!	status=LK
YER031C	YPT31		#NUM!	#NUM!	#NUM!	#NUM!	#NUM!	#NUM!	#NUM!	status=LK
YER032W	FIR1		#NUM!	#NUM!	#NUM!	#NUM!	#NUM!	#NUM!	#NUM!	status=LK
YER033C	ZRG8		#NUM!	#NUM!	#NUM!	#NUM!	#NUM!	#NUM!	#NUM!	status=LK
YER034W	YER034W		#NUM!	#NUM!	#NUM!	#NUM!	#NUM!	#NUM!	#NUM!	status=LK
YER035W	EDC2		#NUM!	#NUM!	#NUM!	#NUM!	#NUM!	#NUM!	#NUM!	status=LK
YER038W-A	YER038W-A		#NUM!	#NUM!	#NUM!	#NUM!	#NUM!	#NUM!	#NUM!	status=LK
YER039C	HVG1		#NUM!	#NUM!	#NUM!	#NUM!	#NUM!	#NUM!	#NUM!	status=LK
YER039C-A	YER039C-A		#NUM!	#NUM!	#NUM!	#NUM!	#NUM!	#NUM!	#NUM!	status=LK
YER041W	YEN1		0.89816	0.03	1.06119	0.04	-0.16482	0.03	0.00038	status=JK
YER042W	MXR1		0.82158	0.082	0.91672	0.035	-0.0984	0.082	0.00027
YER044C-A	MEI4		0.86535	0.102	0.96151	0.047	-0.08871	0.102	0.00045
YER045C	ACA1		1.09555	0.038	1.0399	0.058	0.0459	0.038	0.0004	status=JK
YER046W	SPO73		1.15437	0.047	1.03462	0.014	0.12845	0.047	0.00056	status=JK
YER046W-A	YER046W-A		1.08805	0.066	1.04897	0.039	0.03807	0.066	6e-05
YER047C	SAP1		1.01301	0.127	1.03492	0.056	-0.02455	0.127	0.00054
YER048C	CAJ1		0.90216	0.118	1.03887	0.04	-0.13507	0.117	0.0006
YER049W	TPA1		0.95171	0.143	0.95616	0.041	-0.01098	0.143	0.00091
YER051W	JHD1		1.07821	0.094	1.00984	0.04	0.06687	0.094	0.00018
YER052C	HOM3		0.91873	0.028	0.98493	0.008	-0.06519	0.028	0.00031	status=JK
YER053C	PIC2		1.17906	0.034	1.09278	0.024	0.08213	0.034	1e-05
YER054C	GIP2		1.16978	0.137	1.10546	0.015	0.06342	0.137	0.00044
YER055C	HIS1		0.51651	0.112	0.33195	0.006	0.18585	0.112	0.00269
YER056C	FCY2		1.08268	0.224	1.05166	0.002	0.03371	0.224	0.00235
YER056C-A	RPL34A		0.90428	0.07	1.00416	0.007	-0.09468	0.07	0.00013
YER057C	HMF1		1.02936	0.431	1.07194	0.079	-0.02073	0.43	0.01742
YER059W	PCL6		0.95873	0.041	1.03826	0.051	-0.08127	0.041	0.0006	status=JK
YER060W	FCY21		1.10241	0.043	0.99093	0.011	0.11352	0.042	2e-05
YER060W-A	FCY22		1.08595	0.1	1.06006	0.024	0.02764	0.1	0.00021
YER061C	CEM1		0.89444	0.115	0.84354	0.004	0.0533	0.115	0.00058
YER062C	HOR2		1.09294	0.021	1.1422	0.012	-0.04673	0.021	0.00012	status=JK
YER063W	THO1		1.01532	0.085	0.98827	0.01	0.03058	0.085	0.00016
YER064C	VHR2		1.06091	0.111	1.05505	0.03	0.0123	0.11	0.00031
YER065C	ICL1		0.89466	0.169	0.95128	0.03	-0.06825	0.169	0.00181
YER066C-A	YER066C-A		1.08637	0.082	1.04199	0.048	0.0359	0.082	0.00012
YER066W	RRT13		0.89229	0.03	0.95844	0.04	-0.0681	0.03	0.00038	status=JK
YER067C-A	YER067C-A		1.1701	0.121	0.94897	0.004	0.22388	0.121	0.0003
YER067W	RGI1		0.95856	0.161	1.06384	0.052	-0.11172	0.161	0.00127
YER069W	ARG5		0.62064	0.091	0.53974	0.053	0.07412	0.091	0.00084
YER071C	TDA2		1.02609	0.086	1.03676	0.048	-0.02527	0.086	0.00016
YER072W	VTC1		0.98298	0.107	0.99147	0.021	-0.0101	0.106	0.00035
YER073W	ALD5		1.05407	0.105	1.05788	0.043	-0.0109	0.104	0.00027
YER074W	RPS24A		0.62526	0.031	0.71886	0.046	-0.10612	0.031	3e-05
YER075C	PTP3		0.94813	0.047	1.05854	0.02	-0.10531	0.047	0.00082	status=JK
YER077C	YER077C		1.02886	0.182	0.97785	0.016	0.04783	0.182	0.00148
YER078C	ICP55		0.83422	0.121	1.01526	0.02	-0.18066	0.121	0.00082
YER079W	YER079W		0.95719	0.137	1.02077	0.031	-0.06394	0.137	0.00079
YER080W	AIM9		1.03502	0.202	1.0406	0.033	0.005	0.202	0.00199
YER081W	SER3		1.11994	0.023	0.98484	0.059	0.15289	0.023	0.00014	status=JK
YER083C	GET2		0.85081	0.154	0.88518	0.052	-0.04145	0.154	0.00159
YER084W	YER084W		1.10891	0.069	1.09738	0.097	0.01089	0.068	6e-05
YER085C	YER085C		1.12247	0.024	1.13413	0.017	-0.00617	0.024	0.00015	status=JK
YER087C-A	YER087C-A		1.02282	0.203	1.14323	0.018	-0.11561	0.203	0.00208
YER088C	DOT6		0.92723	0.14	0.9202	0.013	0.01288	0.139	0.00092
YER089C	PTC2		0.95912	0.069	1.06695	0.15	-0.14188	0.069	0.0001
YER090W	TRP2		1.08961	0.101	0.92059	0.018	0.1606	0.101	0.00022
YER091C	MET6		0.9426	0.185	1.04408	0.022	-0.09557	0.185	0.00202
YER091C-A	YER091C-A		1.04471	0.111	1.00784	0.021	0.0391	0.111	0.00033
YER092W	IES5		0.94503	0.04	0.86677	0.057	0.08308	0.04	0.0006	status=JK
YER093C-A	AIM11		0.72551	0.081	0.62688	0.041	0.11167	0.08	0.00037
YER095W	RAD51		0.83456	0.018	0.83484	0.013	-0.00071	0.018	0.00016	status=JK
YER096W	SHC1		0.99306	0.183	1.05224	0.113	-0.05516	0.183	0.00167
YER097W	YER097W		1.05896	0.065	1.02154	0.065	0.02241	0.065	6e-05
YER098W	UBP9		0.98025	0.037	0.94326	0.048	0.0419	0.037	0.00046	status=JK
YER101C	AST2		0.81264	0.056	0.94585	0.111	-0.15502	0.056	0.0016	status=JK
YER106W	MAM1		1.11604	0.018	1.17527	0.101	-0.05662	0.018	9e-05	status=JK
YER108C	YER108C		1.05013	0.134	0.94874	0.113	0.10465	0.134	0.00057
YER109C	FLO8		1.00277	0.082	0.87913	0.035	0.12225	0.082	0.00015
YER111C	SWI4		0.97158	0.099	0.94657	0.077	0.03616	0.099	0.00029
YER113C	TMN3		1.14437	0.04	1.02327	0.016	0.12914	0.04	1e-05
YER114C	BOI2		0.99392	0.038	0.96201	0.03	0.0188	0.038	0.0005	status=JK
YER115C	SPR6		1.10567	0.027	1.04041	0.016	0.06623	0.027	0.00021	status=JK
YER116C	SLX8		0.39419	0.09	0.34197	0.064	0.06857	0.09	0.00311
YER117W	RPL23B		0.87547	0.054	0.88108	0.071	-0.00771	0.054	7e-05
YER118C	SHO1		1.07525	0.038	1.05139	0.058	0.03018	0.038	0.00042	status=JK
YER119C	AVT6		0.95626	0.047	1.02402	0.014	-0.0599	0.047	0.0008	status=JK
YER119C-A	YER119C-A		0.9507	0.095	0.82823	0.038	0.13334	0.095	0.00027
YER120W	SCS2		0.93223	0.087	0.75963	0.081	0.17174	0.087	0.00022
YER121W	YER121W		1.01289	0.085	1.1111	0.002	-0.09608	0.085	0.00016
YER123W	YCK3		0.73525	0.119	0.77683	0.003	-0.04082	0.119	0.00115
YER124C	DSE1		0.94834	0.012	0.90964	0.072	0.05098	0.012	6e-05	status=JK
YER128W	VFA1		0.91321	0.121	0.96419	0.055	-0.03774	0.121	0.00063
YER129W	SAK1		1.01023	0.104	1.06672	0.015	-0.05082	0.103	0.00029
YER130C	YER130C		1.14692	0.068	1.01358	0.053	0.12172	0.068	6e-05
YER131W	RPS26B		0.5179	0.043	0.75418	0.005	-0.23601	0.043	0.00228	status=JK
YER132C	PMD1		0.90613	0.099	0.93801	0.074	-0.02056	0.099	0.00036
YER134C	YER134C		0.99102	0.119	0.93126	0.024	0.06116	0.119	0.00047
YER135C	YER135C		1.07194	0.078	1.07165	0.049	0.01003	0.078	0.00011
YER137C	YER137C		1.18107	0.056	1.19659	0.043	-0.0226	0.056	0.00075	status=JK
YER139C	RTR1		1.00352	0.085	0.98112	0.05	0.02081	0.085	0.00017
YER140W	YER140W		1.01476	0.105	1.07442	0.056	-0.05991	0.105	0.0003
YER142C	MAG1		0.94494	0.094	0.93429	0.028	0.0117	0.094	0.00027
YER143W	DDI1		0.83989	0.283	0.99223	0.015	-0.14363	0.283	0.00959
YER144C	UBP5		1.13174	0.222	0.9931	0.012	0.13645	0.221	0.00201
YER145C	FTR1		0.86227	0.291	1.02594	0.034	-0.16603	0.291	0.00963
YER149C	PEA2		0.91302	0.211	1.02859	0.045	-0.11729	0.211	0.00325
YER150W	SPI1		0.86696	0.017	0.9216	0.028	-0.04914	0.017	0.00012	status=JK
YER151C	UBP3		0.90162	0.02	0.78614	0.036	0.10887	0.02	0.00016	status=JK
YER152C	YER152C		1.0395	0.092	0.97314	0.05	0.07418	0.092	0.00019
YER153C	PET122		0.7181	0.188	0.68876	0.019	0.03195	0.188	0.00467
YER155C	BEM2		1.1206	0.149	0.96647	0.069	0.15454	0.149	0.00064
YER156C	YER156C		0.98965	0.102	0.91691	0.011	0.07015	0.102	0.0003
YER158C	YER158C		1.45762	0.06	1.22384	0.016	0.23222	0.059	0.00056	status=JK
YER161C	SPT2		0.84654	0.097	0.91877	0.018	-0.06905	0.097	0.00041
YER162C	RAD4		0.34137	0.249	0.59857	0.183	-0.23146	0.248	0.07116
YER163C	GCG1		1.07657	0.064	0.97174	0.099	0.07731	0.064	6e-05
YER164W	CHD1		0.94561	0.082	0.95196	0.02	-0.007	0.082	0.00018
YER166W	DNF1		0.81802	0.062	1.07251	0.066	-0.24706	0.062	0.00192	status=JK
YER167W	BCK2		0.99565	0.041	1.01164	0.026	-0.01137	0.041	2e-05
YER170W	ADK2		1.10238	0.018	1.01587	0.031	0.08476	0.018	9e-05	status=JK
YER173W	RAD24		0.95578	0.095	1.09492	0.011	-0.1304	0.095	0.00027
YER174C	GRX4		0.81949	0.056	0.95247	0.066	-0.12873	0.056	0.00155	status=JK
YER175C	TMT1		1.06852	0.031	0.94383	0.018	0.12185	0.031	0.00028	status=JK
YER176W	ECM32		0.91894	0.165	0.96277	0.032	-0.04173	0.165	0.00156
YER177W	BMH1		0.79142	0.296	0.89299	0.021	-0.09757	0.296	0.01283
YER178W	PDA1		0.77743	0.166	0.69569	0.031	0.08234	0.166	0.00258
YER179W	DMC1		0.91302	0.003	0.91929	0.027	-0.00205	0.003	0	status=JK
YER180C	ISC10		1.07319	0.091	0.97131	0.037	0.09522	0.091	0.00017
YER181C	YER181C		0.97646	0.116	0.97159	0.017	0.00991	0.115	0.00045
YER182W	FMP10		1.09897	0.098	1.01492	0.015	0.08847	0.097	0.00019
YER183C	FAU1		1.08971	0.061	1.07436	0.057	0.03773	0.06	5e-05
YER184C	YER184C		1.1287	0.108	1.068	0.009	0.06451	0.108	0.00024
YER185W	PUG1		1.04564	0.105	1.0302	0.008	0.02153	0.105	0.00028
YER186C	YER186C		1.01998	0.146	0.93166	0.06	0.08844	0.146	0.00079
YER187W	YER187W		1.12797	0.128	1.14171	0.057	-0.02498	0.128	0.0004
YER188W	YER188W		0.83954	0.031	1.02617	0.016	-0.19189	0.031	0.00046	status=JK
YFL001W	DEG1		0.63582	0.089	0.61249	0.016	0.02464	0.089	0.00074
YFL003C	MSH4		1.16826	0.103	#NUM!	#NUM!	#NUM!	#NUM!	0.00019
YFL004W	VTC2		0.93645	0.092	0.83668	0.187	0.10661	0.092	0.00026
YFL006W	YFL006W		0.97634	0.096	0.95155	0.049	0.03211	0.096	0.00026
YFL007W	BLM10		0.96227	0.113	0.95273	0.049	0.00581	0.113	0.00044
YFL010C	WWM1		0.88367	0.187	0.91943	0.13	-0.06972	0.187	0.00252
YFL010W-A	AUA1		1.18434	0.128	1.25407	0.007	-0.07118	0.127	0.00034
YFL011W	HXT10		0.87774	0.021	0.98812	0.063	-0.10027	0.021	0.0002	status=JK
YFL012W	YFL012W		1.0346	0.089	1.05996	0.049	-0.01518	0.089	0.00018
YFL013C	IES1		0.97264	0.037	0.90964	0.163	0.04924	0.037	0.00048	status=JK
YFL013W-A	YFL013W-A		0.98142	0.076	0.92522	0.036	0.04708	0.076	0.00013
YFL014W	HSP12		1.11374	0.084	1.03414	0.023	0.07395	0.084	0.00012
YFL015C	YFL015C		1.1122	0.212	1.14683	0.149	-0.05308	0.212	0.00186
YFL018C	LPD1		0.9661	0.192	0.97737	0.068	-0.00753	0.191	0.00208
YFL019C	YFL019C		1.00033	0.031	1.07503	0.001	-0.0716	0.031	0.00032	status=JK
YFL020C	PAU5		1.01113	0.021	1.02471	0.01	-0.00756	0.021	0.00014	status=JK
YFL021W	GAT1		1.05579	0.141	1.1465	0.018	-0.09244	0.141	0.00065
YFL023W	BUD27		0.86207	0.05	0.83435	0.005	0.03023	0.05	5e-05
YFL025C	BST1		1.12728	0.134	1.07111	0.022	0.05959	0.134	0.00046
YFL026W	STE2		0	0	0.00071	0.001	-0.00035	0	#NUM!
YFL027C	GYP8		0.96795	0.104	1.05022	0.041	-0.081	0.104	0.00034
YFL028C	CAF16		1.17524	0.113	1.08137	0.045	0.10592	0.113	0.00024
YFL030W	AGX1		1.01685	0.104	0.95168	0.048	0.05381	0.104	0.00029
YFL031W	HAC1		0.94065	0.085	0.98084	0.108	-0.02639	0.085	0.0002
YFL032W	YFL032W		0.94732	0.174	1.02678	0.127	-0.06034	0.174	0.00167
YFL033C	RIM15		1.10213	0.064	1.02535	0.075	0.05996	0.064	5e-05
YFL034C-A	RPL22B		1.23709	0.117	1.07668	0.046	0.15482	0.117	0.00023
YFL034W	YFL034W		0.90543	0.153	1.01963	0.026	-0.10594	0.153	0.0013
YFL035C-B	YFL035C-B		1.07434	0.104	1.06024	0.102	0.04209	0.103	0.00025
YFL036W	RPO41		0.60718	0.09	0.78912	0.031	-0.18123	0.09	0.00087
YFL040W	YFL040W		0.88913	0.171	1.00123	0.041	-0.10429	0.171	0.0019
YFL041W	FET5		1.09381	0.179	1.10003	0.071	0.00422	0.178	0.00118
YFL042C	YFL042C		1.0886	0.119	0.98461	0.026	0.10824	0.119	0.00036
YFL043C	YFL043C		0.81437	0.027	0.97633	0.069	-0.17332	0.027	0.00037	status=JK
YFL044C	OTU1		1.00608	0.073	1.02864	0.075	-0.03792	0.073	0.00011
YFL046W	FMP32		1.00785	0.114	1.08165	0.052	-0.08276	0.114	0.00039
YFL047W	RGD2		1.07191	0.01	1.05373	0.006	0.01831	0.01	3e-05	status=JK
YFL048C	EMP47		1.18305	0.017	1.18268	0.019	-0.00769	0.017	7e-05	status=JK
YFL049W	SWP82		1.09316	0.08	1.00785	0.11	0.10435	0.08	0.00011
YFL050C	ALR2		1.08904	0.093	1.1357	0.012	-0.04179	0.092	0.00017
YFL051C	YFL051C		0.9985	0.014	1.01448	0.054	-0.01612	0.014	7e-05	status=JK
YFL052W	YFL052W		1.06318	0.012	1.09075	0.037	-0.03413	0.012	0
YFL053W	DAK2		1.06467	0.055	1.09508	0.015	-0.03626	0.054	4e-05
YFL054C	YFL054C		1.16645	0.034	1.13336	0.047	0.04772	0.034	1e-05
YFL055W	AGP3		0.98239	0.059	1.07457	0.046	-0.08143	0.059	6e-05
YFL056C	AAD6		1.00941	0.114	1.09003	0.079	-0.07055	0.114	0.00039
YFL063W	YFL063W		1.10072	0.043	1.14521	0.037	-0.05056	0.043	0.00052	status=JK
YFR006W	YFR006W		0.97595	0.154	0.92352	0.028	0.06126	0.154	0.00107
YFR007W	YFH7		1.04457	0.04	0.9493	0.032	0.09422	0.04	0.00048	status=JK
YFR008W	FAR7		0.84053	0.206	0.92855	0.035	-0.07945	0.205	0.00384
YFR009W	GCN20		1.04506	0.06	0.9962	0.064	0.05578	0.06	5e-05
YFR010W	UBP6		0.72721	0.084	0.5769	0.011	0.15227	0.084	0.00043
YFR011C	AIM13		0.91498	0.015	0.76682	0.059	0.16452	0.015	0
YFR012W	DCV1		0.84339	0.165	0.97113	0.033	-0.12568	0.164	0.00199
YFR013W	IOC3		0.87808	0.223	0.96896	0.011	-0.097	0.222	0.00424
YFR014C	CMK1		1.19511	0.08	1.04563	0.036	0.15573	0.08	8e-05
YFR015C	GSY1		1.10456	0.085	1.13036	0.033	-0.01873	0.085	0.00012
YFR016C	YFR016C		1.1632	0.022	1.07154	0.034	0.08313	0.022	0.00012	status=JK
YFR017C	IGD1		1.1221	0.052	1.01459	0.029	0.10482	0.052	3e-05
YFR018C	YFR018C		1.11639	0.088	1.0924	0.023	0.02677	0.088	0.00013
YFR019W	FAB1		0.81595	0.015	0.83087	0.057	-0.02562	0.015	0.00012	status=JK
YFR020W	YFR020W		1.17386	0.104	1.06691	0.068	0.08888	0.104	0.00019
YFR021W	ATG18		0.81076	0.059	0.93368	0.05	-0.11693	0.059	0.00011
YFR022W	ROG3		1.15788	0.04	1.01473	0.019	0.14451	0.04	0.0004	status=JK
YFR023W	PES4		1.07045	0.164	0.94814	0.043	0.12031	0.163	0.00096
YFR024C	YFR024C		0.97907	0.194	1.0234	0.039	-0.03743	0.194	0.00208
YFR024C-A	LSB3		1.09821	0.145	1.17115	0.076	-0.06758	0.145	0.00062
YFR025C	HIS2		0.51413	0.089	0.42965	0.061	0.09977	0.089	0.00138
YFR026C	ULI1		1.02368	0.026	1.00931	0.008	0.01141	0.026	0
YFR030W	MET10		0.98379	0.1	0.94297	0.022	0.0457	0.1	0.00028
YFR031C-A	RPL2A		0.98648	0.025	1.03305	0.027	-0.04689	0.025	0.00022	status=JK
YFR032C	RRT5		1.13994	0.008	1.07157	0.109	0.09228	0.008	0
YFR032C-A	RPL29		0.7962	0.138	0.8506	0.018	-0.05103	0.138	0.00141
YFR033C	QCR6		0.97129	0.093	0.98681	0.041	-0.00959	0.093	0.00024
YFR034C	PHO4		1.01746	0.103	1.04932	0.03	-0.03714	0.103	0.00028
YFR035C	YFR035C		1.16065	0.104	0.99751	0.007	0.15854	0.104	0.0002
YFR038W	IRC5		0.93068	0.117	0.94384	0.042	-0.01454	0.117	0.00054
YFR039C	YFR039C		0.97281	0.165	0.953	0.033	0.0122	0.165	0.00132
YFR040W	SAP155		0.89492	0.101	0.87268	0.051	0.02507	0.101	0.00039
YFR041C	ERJ5		1.13625	0.1	1.06644	0.043	0.05	0.1	0.00019
YFR043C	IRC6		1.09469	0.047	1.14926	0.034	-0.05748	0.047	2e-05
YFR044C	DUG1		1.00907	0.154	1.00985	0.06	0.00523	0.154	0.00097
YFR045W	YFR045W		0.93332	0.008	1.06476	0.005	-0.13551	0.008	3e-05	status=JK
YFR046C	CNN1		1.07937	0.082	1.15547	0.04	-0.08411	0.082	0.00012
YFR047C	BNA6		0.91384	0.08	0.93266	0.132	-0.04944	0.08	0.00018
YFR048W	RMD8		1.0364	0.04	1.02712	0.057	0.00117	0.04	0.0005	status=JK
YFR049W	YMR31		0.93772	0.022	1.06899	0.03	-0.13565	0.022	0.00019	status=JK
YFR053C	HXK1		0.90651	0.019	0.99376	0.055	-0.08506	0.019	0.00015	status=JK
YFR054C	YFR054C		1.06056	0.072	1.06928	0.075	-0.01786	0.072	9e-05
YFR055W	IRC7		1.03261	0.077	1.01386	0.031	0.02403	0.076	0.00011
YFR056C	YFR056C		1.05231	0.137	0.96818	0.031	0.08776	0.137	0.0006
YFR057W	YFR057W		1.28392	0.02	1.17599	0.036	0.09646	0.02	0
YGL002W	ERP6		0.95287	0.228	0.99491	0.05	-0.05357	0.228	0.00361
YGL004C	RPN14		0.93478	0.223	0.9822	0.053	-0.0493	0.223	0.00358
YGL005C	COG7		0.95144	0.107	1.07534	0.009	-0.12451	0.107	0.00039
YGL006W	PMC1		0.85074	0.04	0.91416	0.127	-0.09461	0.04	0.00074	status=JK
YGL007W	YGL007W		0.81677	0.069	0.83867	0.041	-0.01721	0.069	0.00016
YGL009C	LEU1		1.00601	0.161	0.98043	0.029	0.03222	0.16	0.0011
YGL010W	YGL010W		1.06805	0.154	1.11459	0.099	-0.05293	0.154	0.00082
YGL013C	PDR1		0.96959	0.104	0.86994	0.01	0.10067	0.104	0.00034
YGL014W	PUF4		0.9977	0.07	0.99616	0.045	-0.00981	0.07	0.0001
YGL015C	YGL015C		1.08464	0.158	1.07464	0.021	0.00223	0.157	0.00083
YGL016W	KAP122		0.76041	0.047	0.80048	0.017	-0.04109	0.047	6e-05
YGL017W	ATE1		1.01913	0.138	1.01608	0.057	0.00977	0.138	0.00067
YGL019W	CKB1		0.99428	0.184	0.98877	0.071	-0.00949	0.184	0.00171
YGL020C	GET1		1.05071	0.082	1.11933	0.104	-0.07952	0.082	0.00013
YGL021W	ALK1		1.11882	0.09	1.11436	0.039	0.00581	0.09	0.00014
YGL023C	PIB2		0.84416	0.014	0.90767	0.023	-0.07148	0.014	9e-05	status=JK
YGL024W	YGL024W		0.47549	0.024	0.39264	0.012	0.08511	0.024	0.00085	status=JK
YGL026C	TRP5		0.00754	0.003	0.0005	0.001	0.00753	0.003	0.0567	status=JK
YGL027C	CWH41		1.06696	0.022	1.01003	0.032	0.05729	0.022	0
YGL028C	SCW11		1.17025	0.073	1.07962	0.034	0.09601	0.072	7e-05
YGL029W	CGR1		0.83249	0.091	0.89831	0.233	-0.06636	0.091	0.00036
YGL031C	RPL24A		0.65635	0.1	0.63537	0.045	0.03188	0.1	0.00096
YGL032C	AGA2		1.1844	0.143	1.17358	0.048	0.01501	0.143	0.00048
YGL034C	YGL034C		1.05217	0.236	1.11632	0.01	-0.0662	0.235	0.00296
YGL035C	MIG1		1.04793	0.07	0.94385	0.006	0.10048	0.07	8e-05
YGL036W	YGL036W		0.67325	0.362	1.03142	0.087	-0.36606	0.361	0.03379
YGL037C	PNC1		1.03514	0.111	1.14308	0.142	-0.11684	0.111	0.00034
YGL039W	YGL039W		1.1152	0.21	1.05151	0.064	0.05178	0.209	0.00177
YGL041C	YGL041C		1.08839	0.075	0.98709	0.023	0.10485	0.075	9e-05
YGL042C	YGL042C		1.03776	0.065	1.06267	0.1	-0.04811	0.065	7e-05
YGL043W	DST1		0.93929	0.095	0.79623	0.015	0.14107	0.095	0.00028
YGL045W	RIM8		0.01328	0.013	0.16262	0.12	-0.17181	0.013	0.22207	status=JK
YGL046W	YGL046W		0.84858	0.018	0.559	0.012	0.28285	0.018	0.00016	status=JK
YGL049C	TIF4632		1.10123	0.012	0.9244	0.054	0.16169	0.012	4e-05	status=JK
YGL050W	TYW3		1.16254	0.091	1.10555	0.037	0.05001	0.091	0.00013
YGL051W	MST27		1.02424	0.111	1.03721	0.058	-0.00327	0.11	0.00034
YGL053W	PRM8		1.07814	0.13	1.06405	0.058	0.03236	0.13	0.00048
YGL054C	ERV14		1.01546	0.029	1.0709	0.151	-0.06877	0.029	0.00027	status=JK
YGL056C	SDS23		0.8874	0.202	1.00234	0.062	-0.11801	0.201	0.0031
YGL057C	GEP7		0.74256	0.029	0.68501	0.063	0.05891	0.029	0.00051	status=JK
YGL058W	RAD6		1.17361	0.029	1.00551	0.058	0.16749	0.029	0.00021	status=JK
YGL059W	PKP2		1.07038	0.169	0.99577	0.047	0.08365	0.169	0.00106
YGL060W	YBP2		1.01969	0.103	1.01761	0.075	0.00711	0.102	0.00028
YGL062W	PYC1		1.12487	0.096	1.19159	0.016	-0.06784	0.096	0.00017
YGL063W	PUS2		1.04626	0.052	0.87166	0.287	0.17323	0.052	0.00082	status=JK
YGL066W	SGF73		0.77164	0.03	0.79415	0.003	-0.02451	0.03	0.00049	status=JK
YGL067W	NPY1		0.99486	0.123	1.06696	0.032	-0.06917	0.122	0.00051
YGL071W	AFT1		0.96235	0.148	0.92272	0.157	0.04806	0.148	0.00098
YGL077C	HNM1		0.99409	0.087	0.99971	0.054	0.00766	0.087	0.00019
YGL078C	DBP3		0.74521	0.097	0.8082	0.07	-0.08423	0.097	0.0006
YGL079W	KXD1		0.96053	0.149	0.94647	0.029	0.01891	0.149	0.00101
YGL080W	FMP37		0.77674	0.106	0.71504	0.021	0.06924	0.106	0.00069
YGL081W	YGL081W		1.08156	0.1	1.10231	0.054	-0.03002	0.1	0.00022
YGL082W	YGL082W		1.07974	0.217	1.0719	0.029	-0.00092	0.216	0.00215
YGL083W	SCY1		1.10054	0.064	0.99069	0.02	0.10415	0.064	0.00111	status=JK
YGL084C	GUP1		0.82885	0.017	0.92928	0.055	-0.10566	0.017	0.00014	status=JK
YGL085W	LCL3		0.83492	0.036	1.03223	0.065	-0.20503	0.036	0.00061	status=JK
YGL086W	MAD1		1.02624	0.179	0.97192	0.041	0.04607	0.179	0.00143
YGL087C	MMS2		0.88232	0.235	0.87085	0.045	0.01426	0.235	0.00492
YGL089C	MF(ALPHA)2		1.00281	0.088	1.02268	0.05	-0.03024	0.088	0.00019
YGL090W	LIF1		1.06254	0.027	1.03429	0.023	0.02531	0.027	0.00021	status=JK
YGL094C	PAN2		1.02582	0.095	1.07908	0.12	-0.07883	0.095	0.00022
YGL096W	TOS8		0.89363	0.112	0.921	0.224	-0.04382	0.111	0.00053
YGL101W	YGL101W		1.10022	0.141	1.00568	0.006	0.095	0.141	0.00057
YGL104C	VPS73		0.83552	0.032	0.96769	0.104	-0.14788	0.032	0.0005	status=JK
YGL105W	ARC1		0.01252	0.015	0.0048	0.008	0.01249	0.015	0.1878
YGL108C	YGL108C		1.05561	0.089	1.05417	0.001	-0.00092	0.088	0.00016
YGL109W	YGL109W		1.06929	0.081	1.08224	0.018	-0.01859	0.081	0.00012
YGL110C	CUE3		0.97048	0.075	0.95154	0.037	0.01386	0.075	0.00013
YGL114W	YGL114W		0.9436	0.18	0.96809	0.008	-0.02639	0.18	0.00185
YGL115W	SNF4		0.95938	0.092	0.90726	0.057	0.06689	0.091	0.00024
YGL117W	YGL117W		1.17968	0.032	1.18285	0.034	-0.02514	0.031	0.00024	status=JK
YGL118C	YGL118C		1.08324	0.057	1.057	0.042	0.00286	0.057	0.00093	status=JK
YGL121C	GPG1		0.91122	0.242	1.03229	0.012	-0.12089	0.242	0.00485
YGL124C	MON1		0.89133	0.114	0.90285	0.106	-0.02962	0.114	0.00057
YGL125W	MET13		1.21614	0.151	1.12039	0.035	0.08374	0.151	0.00052
YGL126W	SCS3		1.00104	0.109	1.0182	0.021	-0.01674	0.108	0.00035
YGL127C	SOH1		0.54837	0.063	0.50746	0.051	0.04058	0.063	0.00042
YGL131C	SNT2		0.96107	0.086	0.95863	0.036	0.00337	0.086	0.0002
YGL132W	YGL132W		0.85644	0.25	0.9417	0.003	-0.08589	0.25	0.00637
YGL133W	ITC1		1.02221	0.111	1.04072	0.023	-0.01703	0.111	0.00035
YGL136C	MRM2		0.00476	0.006	0.38409	0.163	-0.42114	0.006	0.29441	status=JK
YGL138C	YGL138C		1.06617	0.057	1.16354	0.1	-0.10517	0.057	4e-05
YGL139W	FLC3		1.11376	0.16	1.02019	0.041	0.08775	0.159	0.0008
YGL140C	YGL140C		1.05422	0.104	1.00163	0.074	0.04158	0.104	0.00026
YGL141W	HUL5		0.84632	0.117	0.98662	0.089	-0.14703	0.117	0.00072
YGL144C	ROG1		1.05859	0.124	1.04894	0.055	-0.01035	0.124	0.00044
YGL146C	RRT6		1.00125	0.094	1.10987	0.023	-0.11099	0.094	0.00023
YGL147C	RPL9A		1.07181	0.083	1.05608	0.02	0.01802	0.082	0.00013
YGL148W	ARO2		1.01845	0.032	0.84892	0.055	0.15509	0.032	0.00034	status=JK
YGL149W	YGL149W		0.80011	0.102	0.9813	0.071	-0.17731	0.102	0.00056
YGL151W	NUT1		0.90152	0.026	0.74169	0.098	0.17837	0.026	1e-05
YGL152C	YGL152C		1.06521	0.137	1.03447	0.096	0.04544	0.137	0.00058
YGL153W	PEX14		0.87126	0.204	0.85653	0.104	-0.01043	0.204	0.00337
YGL154C	LYS5		0.46442	0.168	0.36856	0.095	0.11668	0.167	0.0116
YGL156W	AMS1		1.07578	0.188	0.91273	0.015	0.16284	0.188	0.00143
YGL157W	ARI1		1.25651	0.022	1.1197	0.043	0.13802	0.022	0.0001	status=JK
YGL158W	RCK1		1.09879	0.204	1.03673	0.082	0.07513	0.204	0.00172
YGL159W	YGL159W		0.87814	0.052	0.99776	0.027	-0.11557	0.052	0.00116	status=JK
YGL160W	AIM14		1.03949	0.011	0.9105	0.078	0.1255	0.011	4e-05	status=JK
YGL161C	YIP5		1.1157	0.167	1.05877	0.036	0.04844	0.167	0.00091
YGL162W	SUT1		1.16159	0.053	0.99796	0.037	0.16339	0.053	3e-05
YGL163C	RAD54		0.89033	0.061	0.86629	0.022	0.02026	0.061	9e-05
YGL164C	YRB30		1.10132	0.066	1.13791	0.057	-0.04888	0.066	6e-05
YGL165C	YGL165C		1.15272	0.029	1.11089	0.014	0.03243	0.029	0.00022	status=JK
YGL166W	CUP2		1.18762	0.05	1.05897	0.039	0.1243	0.05	2e-05
YGL167C	PMR1		0.7666	0.021	0.76971	0.026	-0.00576	0.021	0.00025	status=JK
YGL168W	HUR1		0.68629	0.081	0.77827	0.045	-0.10161	0.081	0.00044
YGL170C	SPO74		1.05523	0.161	1.04156	0.072	-0.00739	0.161	0.00097
YGL173C	XRN1		0.33736	0.124	0.54276	0.039	-0.20612	0.124	0.01224
YGL174W	BUD13		0.68296	0.074	0.74299	0.061	-0.07085	0.073	0.00034
YGL175C	SAE2		1.02129	0.206	0.9466	0.044	0.07121	0.205	0.00217
YGL176C	YGL176C		1.26464	0.229	1.16665	0.048	0.10038	0.228	0.00158
YGL177W	YGL177W		1.32811	0.02	1.19022	0.041	0.12828	0.02	8e-05	status=JK
YGL179C	TOS3		1.18757	0.116	1.18558	0.03	0.00326	0.116	0.00026
YGL180W	ATG1		0.86921	0.128	0.88583	0.094	-0.01459	0.128	0.00086
YGL181W	GTS1		0.9723	0.151	1.01845	0.037	-0.04601	0.151	0.00101
YGL194C	HOS2		0.5974	0.051	0.46128	0.014	0.13342	0.051	0.00017
YGL195W	GCN1		0.94554	0.141	0.83841	0.056	0.09593	0.14	0.00089
YGL196W	DSD1		0.82069	0.094	0.99958	0.056	-0.19859	0.093	0.0004
YGL197W	MDS3		0.825	0.154	0.90613	0.054	-0.08261	0.154	0.00173
YGL198W	YIP4		1.1334	0.163	1.09256	0.047	0.0385	0.163	0.00081
YGL199C	YGL199C		1.03444	0.334	0.97263	0.066	0.07511	0.333	0.00844
YGL202W	ARO8		1.18621	0.056	1.07165	0.037	0.1081	0.056	0.00074	status=JK
YGL203C	KEX1		0.78722	0.254	1.02964	0.014	-0.24969	0.254	0.00848
YGL205W	POX1		0.91587	0.164	0.96741	0.022	-0.04833	0.164	0.00155
YGL208W	SIP2		0.97909	0.007	0.97321	0.051	0.00268	0.007	2e-05	status=JK
YGL209W	MIG2		1.01224	0.057	0.93238	0.012	0.07528	0.057	5e-05
YGL210W	YPT32		0.92865	0.101	0.94675	0.035	-0.0237	0.101	0.00035
YGL211W	NCS6		0.96815	0.127	0.99759	0.008	-0.03005	0.127	0.00061
YGL212W	VAM7		0.76947	0.089	0.75667	0.025	0.01238	0.089	0.00043
YGL213C	SKI8		1.10224	0.199	1.02848	0.011	0.07313	0.198	0.00157
YGL214W	YGL214W		0.01326	0.013	0.0804	0.053	-0.05006	0.013	0.22713	status=JK
YGL215W	CLG1		0.94842	0.043	0.91684	0.023	0.02413	0.043	0.00067	status=JK
YGL216W	KIP3		0.88723	0.116	0.95848	0.047	-0.06154	0.115	0.0006
YGL217C	YGL217C		1.03645	0.067	0.99325	0.019	0.04078	0.067	8e-05
YGL218W	YGL218W		0.71691	0.167	0.73419	0.035	-0.03093	0.167	0.00332
YGL219C	MDM34		0.88486	0.203	0.93932	0.023	-0.0523	0.203	0.00317
YGL221C	NIF3		1.08207	0.057	0.95705	0.024	0.12722	0.057	0.00092	status=JK
YGL222C	EDC1		1.04052	0.028	1.11345	0.038	-0.08083	0.028	0.00025	status=JK
YGL224C	SDT1		1.07112	0.094	1.07507	0.007	-0.00455	0.094	0.00019
YGL226C-A	OST5		1.13	0.176	1.19527	0.025	-0.06686	0.176	0.00102
YGL226W	MTC3		1.0193	0.052	0.90508	0.071	0.12331	0.052	4e-05
YGL227W	VID30		0.91643	0.131	1.04774	0.067	-0.13376	0.13	0.00078
YGL228W	SHE10		1.04593	0.097	1.02911	0.013	0.0142	0.097	0.00022
YGL229C	SAP4		1.12885	0.197	1.12463	0.029	0.00901	0.197	0.00142
YGL230C	YGL230C		0.90076	0.212	0.97867	0.066	-0.09912	0.211	0.0034
YGL231C	EMC4		0.98611	0.044	1.0613	0.037	-0.08463	0.044	0.00067	status=JK
YGL232W	TAN1		1.13099	0.128	1.18735	0.029	-0.05237	0.127	0.00039
YGL234W	ADE5		1.02404	0.078	1.0391	0.051	-0.01745	0.078	0.00012
YGL235W	YGL235W		1.07372	0.159	0.73627	0.038	0.33855	0.159	0.00088
YGL236C	MTO1		0.99093	0.15	0.77562	0.022	0.21123	0.15	0.00094
YGL237C	HAP2		0.96738	0.03	0.74024	0.03	0.22699	0.03	0.00031	status=JK
YGL241W	KAP114		1.2211	0.168	1.12164	0.027	0.10041	0.168	0.0007
YGL242C	YGL242C		1.07531	0.11	1.03672	0.058	0.0274	0.11	0.00029
YGL243W	TAD1		1.19289	0.074	1.03552	0.028	0.15636	0.074	0.00128	status=JK
YGL244W	RTF1		0.55813	0.173	0.52704	0.093	-0.00152	0.173	0.00757
YGL248W	PDE1		1.01818	0.043	1.00012	0.068	0.02027	0.043	2e-05
YGL249W	ZIP2		1.29099	0.081	1.04051	0.018	0.25093	0.081	0.00131	status=JK
YGL250W	RMR1		1.09623	0.119	1.00214	0.097	0.08859	0.118	0.00035
YGL251C	HFM1		1.14469	0.105	1.15555	0.03	-0.00743	0.105	0.00021
YGL252C	RTG2		0.48499	0.115	0.47739	0.088	-0.01084	0.115	0.00352
YGL253W	HXK2		0.91742	0.178	0.94173	0.059	-0.0141	0.178	0.00196
YGL254W	FZF1		0.7987	0.061	0.94935	0.024	-0.15237	0.061	0.00197	status=JK
YGL255W	ZRT1		0.95031	0.135	0.99459	0.051	-0.05674	0.135	0.00077
YGL256W	ADH4		1.1311	0.038	1.12998	0.018	-0.00341	0.037	0.00037	status=JK
YGL257C	MNT2		1.19559	0.062	1.12176	0.054	0.0707	0.062	0.0009	status=JK
YGL258W	VEL1		1.06207	0.054	0.95832	0.046	0.10908	0.054	0.00086	status=JK
YGL259W	YPS5		1.07525	0.252	1.08088	0.075	-0.03072	0.252	0.0034
YGL260W	YGL260W		1.03961	0.139	1.0618	0.027	-0.02276	0.139	0.00065
YGL261C	PAU11		0.96308	0.137	0.88272	0.053	0.09248	0.137	0.00078
YGL262W	YGL262W		0.89617	0.08	1.07246	0.044	-0.17886	0.08	0.0002
YGL263W	COS12		0.9031	0.172	1.02363	0.1	-0.1463	0.172	0.00185
YGR001C	YGR001C		1.04888	0.018	1.00812	0.103	0.04329	0.018	0.0001	status=JK
YGR003W	CUL3		1.03423	0.094	1.06236	0.125	-0.03676	0.094	0.0002
YGR004W	PEX31		0.91605	0.094	0.97334	0.052	-0.06238	0.093	0.00029
YGR007W	ECT1		1.07647	0.027	0.97332	0.001	0.10092	0.027	0.00021	status=JK
YGR008C	STF2		1.09048	0.035	1.03455	0.097	0.05459	0.035	1e-05
YGR010W	NMA2		1.02088	0.042	0.98429	0.025	0.01993	0.042	2e-05
YGR011W	YGR011W		0.88655	0.15	0.95183	0.054	-0.06255	0.149	0.00129
YGR012W	YGR012W		1.08628	0.067	1.14507	0.041	-0.05874	0.067	7e-05
YGR014W	MSB2		1.07374	0.061	1.05674	0.029	0.01461	0.06	5e-05
YGR015C	YGR015C		1.02014	0.187	0.99863	0.04	0.01607	0.187	0.00166
YGR016W	YGR016W		1.18529	0.191	1.09178	0.021	0.08657	0.191	0.00113
YGR017W	YGR017W		0.91801	0.063	0.77097	0.071	0.14865	0.063	9e-05
YGR018C	YGR018C		1.01257	0.09	0.92435	0.019	0.08965	0.09	0.00019
YGR019W	UGA1		0.99769	0.13	1.01384	0.092	-0.02367	0.129	0.00059
YGR021W	YGR021W		1.01221	0.157	0.93776	0.025	0.0578	0.157	0.00101
YGR022C	YGR022C		0.88816	0.081	0.92355	0.045	-0.04494	0.081	0.00021
YGR023W	MTL1		1.0108	0.016	1.09043	0.042	-0.08897	0.016	9e-05	status=JK
YGR025W	YGR025W		1.1254	0.052	1.11934	0.009	0.00722	0.051	3e-05
YGR026W	YGR026W		0.88859	0.118	0.95804	0.05	-0.07212	0.118	0.00064
YGR027C	RPS25A		0.68921	0.008	0.63967	0.077	0.05791	0.008	5e-05	status=JK
YGR028W	MSP1		0.92706	0.149	0.90755	0.073	0.02004	0.149	0.00112
YGR031W	IMO32		0.91819	0.016	1.03084	0.035	-0.10527	0.016	0.0001	status=JK
YGR032W	GSC2		0.96158	0.149	0.95402	0.106	0.00032	0.148	0.001
YGR033C	TIM21		1.21647	0.023	1.16051	0.145	0.03209	0.023	0.00012	status=JK
YGR034W	RPL26B		1.12258	0.058	0.90789	0.114	0.20875	0.058	0.00089	status=JK
YGR035C	YGR035C		0.98193	0.133	0.9129	0.022	0.07372	0.133	0.00067
YGR037C	ACB1		0.9185	0.019	0.87645	0.005	0.03962	0.019	0.00015	status=JK
YGR038W	ORM1		0.90232	0.388	0.97947	0.021	-0.07446	0.387	0.01872
YGR039W	YGR039W		1.01598	0.216	0.99732	0.04	0.02165	0.216	0.00256
YGR040W	KSS1		1.01163	0.218	0.9799	0.045	0.01692	0.218	0.00266
YGR041W	BUD9		0.87596	0.226	1.01916	0.027	-0.14999	0.226	0.00447
YGR042W	YGR042W		1.07259	0.035	1.04298	0.011	0.02536	0.035	1e-05
YGR043C	NQM1		1.08162	0.018	1.07972	0.028	-0.00275	0.018	9e-05	status=JK
YGR044C	RME1		1.22427	0.023	1.08873	0.025	0.12837	0.023	0.00011	status=JK
YGR045C	YGR045C		1.07159	0.073	1.02803	0.018	0.04491	0.073	9e-05
YGR049W	SCM4		0.716	0.155	0.99533	0.115	-0.26762	0.154	0.00266
YGR050C	YGR050C		1.1689	0.207	1.07912	0.006	0.0855	0.207	0.00149
YGR051C	YGR051C		1.43023	0.069	1.30319	0.099	0.14453	0.069	0.00078	status=JK
YGR052W	FMP48		1.05423	0.164	1.02777	0.054	0.02628	0.164	0.00102
YGR053C	YGR053C		1.07007	0.024	0.96798	0.048	0.0937	0.024	0.00017	status=JK
YGR054W	YGR054W		0.92367	0.151	1.03893	0.044	-0.11629	0.151	0.00118
YGR055W	MUP1		0.99187	0.125	1.15139	0.123	-0.16426	0.125	0.00055
YGR058W	PEF1		1.04137	0.021	0.98569	0.087	0.04769	0.021	0.00013	status=JK
YGR059W	SPR3		0.80517	0.059	0.85342	0.014	-0.04923	0.059	0.00177	status=JK
YGR061C	ADE6		0.62354	0.134	0.92877	0.021	-0.30987	0.133	0.00261
YGR066C	YGR066C		1.07388	0.038	1.1279	0.035	-0.04959	0.038	1e-05
YGR067C	YGR067C		0.96118	0.06	1.10011	0.145	-0.12763	0.06	0.00131	status=JK
YGR068C	ART5		1.05378	0.087	1.09403	0.124	-0.05282	0.087	0.00016
YGR069W	YGR069W		1.10131	0.036	1.09526	0.019	-0.001	0.035	0.00035	status=JK
YGR070W	ROM1		1.01004	0.034	1.15413	0.056	-0.16447	0.034	0.00039	status=JK
YGR071C	ENV11		0.9955	0.138	0.90479	0.014	0.09044	0.138	0.00072
YGR072W	UPF3		1.00516	0.112	0.88164	0.039	0.11682	0.112	0.00038
YGR077C	PEX8		0.83977	0.153	0.75161	0.051	0.09899	0.153	0.00162
YGR078C	PAC10		0.64176	0.132	0.82835	0.071	-0.18467	0.132	0.00233
YGR079W	YGR079W		0.99093	0.176	0.99933	0.05	-0.02704	0.176	0.00151
YGR080W	TWF1		1.03031	0.028	1.04627	0.02	-0.01524	0.028	0.00024	status=JK
YGR081C	SLX9		0.67288	0.073	0.74212	0.069	-0.07661	0.073	0.00035
YGR084C	MRP13		1.03538	0.076	1.07844	0.01	-0.04594	0.075	0.00011
YGR085C	RPL11B		0.7952	0.147	0.8652	0.033	-0.06208	0.147	0.0017
YGR086C	PIL1		1.02374	0.062	1.10833	0.018	-0.09621	0.062	6e-05
YGR087C	PDC6		0.99762	0.122	1.02359	0.022	-0.03068	0.122	0.0005
YGR088W	CTT1		1.05137	0.127	1.14629	0.059	-0.1072	0.127	0.00048
YGR089W	NNF2		0.87909	0.121	0.96064	0.083	-0.08807	0.121	0.00071
YGR092W	DBF2		0.45564	0.218	0.49523	0.047	-0.05074	0.217	0.02487
YGR093W	YGR093W		0.94734	0.152	0.98197	0.094	-0.03501	0.151	0.00111
YGR096W	TPC1		1.08566	0.063	0.9401	0.039	0.14995	0.063	5e-05
YGR097W	ASK10		0.68062	0.168	0.90214	0.012	-0.22084	0.168	0.00393
YGR100W	MDR1		1.13783	0.082	1.00414	0.082	0.12895	0.082	0.0001
YGR101W	PCP1		0.85429	0.02	0.86899	0.049	-0.0128	0.02	0
YGR105W	VMA21		0.25727	0.025	0.46991	0.036	-0.20864	0.025	0.00307	status=JK
YGR106C	VOA1		0.92321	0.122	1.07484	0.022	-0.15446	0.122	0.00063
YGR107W	YGR107W		0.96128	0.137	0.96904	0.033	-0.01634	0.137	0.00078
YGR108W	CLB1		1.10968	0.145	0.96932	0.067	0.13803	0.144	0.0006
YGR109C	CLB6		1.1527	0.106	1.00338	0.008	0.14961	0.106	0.00283	status=JK
YGR110W	CLD1		1.09182	0.047	0.99243	0.064	0.10915	0.047	0.00062	status=JK
YGR111W	YGR111W		0.99878	0.004	0.9378	0.005	0.05807	0.004	1e-05	status=JK
YGR117C	YGR117C		0.98229	0.157	0.94086	0.036	0.03255	0.157	0.0011
YGR118W	RPS23A		0.73612	0.109	0.91966	0.041	-0.1897	0.108	0.00087
YGR121C	MEP1		1.15964	0.023	1.02108	0.031	0.12969	0.023	0.00013	status=JK
YGR122C-A	YGR122C-A		1.10072	0.12	1.12924	0.14	-0.02482	0.12	0.00035
YGR122W	YGR122W		0.87916	0.131	0.98645	0.147	-0.13307	0.131	0.0009
YGR123C	PPT1		1.15677	0.054	1.13135	0.043	0.02669	0.054	3e-05
YGR124W	ASN2		0.99122	0.005	0.94101	0.053	0.05555	0.005	1e-05	status=JK
YGR125W	YGR125W		0.93159	0.179	0.79377	0.048	0.14401	0.179	0.00191
YGR126W	YGR126W		1.13967	0.128	1.18992	0.038	-0.04583	0.128	0.00039
YGR127W	YGR127W		0.99887	0.149	1.09184	0.009	-0.10039	0.148	0.00089
YGR129W	SYF2		0.96428	0.064	0.98852	0.107	-0.00079	0.064	8e-05
YGR130C	YGR130C		0.85859	0.142	1.07242	0.06	-0.2103	0.142	0.00122
YGR131W	FHN1		1.13076	0.087	1.09978	0.009	0.02748	0.087	0.00012
YGR132C	PHB1		0.9215	0.091	0.91064	0.063	-0.00583	0.091	0.00026
YGR133W	PEX4		1.03428	0.083	0.96757	0.06	0.07843	0.083	0.00014
YGR134W	CAF130		1.05646	0.082	1.03241	0.016	0.02124	0.082	0.00013
YGR135W	PRE9		0.79169	0.011	0.97103	0.053	-0.19179	0.011	6e-05	status=JK
YGR136W	LSB1		1.02363	0.198	0.95861	0.096	0.05983	0.198	0.00194
YGR137W	YGR137W		0.99593	0.072	1.06825	0.053	-0.0762	0.072	0.00173	status=JK
YGR138C	TPO2		0.94469	0.208	1.15402	0.088	-0.1997	0.207	0.00281
YGR139W	YGR139W		1.1282	0.171	1.21902	0.075	-0.07838	0.17	0.00094
YGR141W	VPS62		0.94967	0.113	0.99483	0.103	-0.04309	0.113	0.00046
YGR142W	BTN2		0.9818	0.186	0.91692	0.044	0.06258	0.186	0.00182
YGR143W	SKN1		1.14637	0.082	1.12573	0.048	0.02422	0.082	0.0001
YGR144W	THI4		1.14402	0.059	1.12842	0.069	0.00846	0.059	4e-05
YGR146C	ECL1		1.06889	0.018	1.06883	0.021	-0.01352	0.018	0.0001	status=JK
YGR148C	RPL24B		0.70126	0.028	0.7807	0.042	-0.08301	0.028	2e-05
YGR149W	YGR149W		1.10377	0.162	1.12767	0.013	-0.03018	0.162	0.00086
YGR151C	YGR151C		1.16935	0.116	1.1588	0.089	-0.00319	0.116	0.00027
YGR152C	RSR1		1.02675	0.114	1.01726	0.139	-0.01837	0.114	0.00038
YGR153W	YGR153W		0.94577	0.149	0.91109	0.046	0.02781	0.148	0.00104
YGR154C	GTO1		1.14467	0.141	0.97833	0.047	0.15511	0.141	0.00051
YGR157W	CHO2		0.5951	0.181	0.482	0.037	0.11948	0.18	0.0071
YGR161C	RTS3		0.86588	0.15	1.04431	0.055	-0.16495	0.15	0.0014
YGR163W	GTR2		0.821	0.154	0.92719	0.035	-0.11375	0.154	0.00177
YGR164W	YGR164W		0.89252	0.037	1.09377	0.003	-0.20461	0.037	0.00057	status=JK
YGR166W	TRS65		0.96673	0.026	0.91092	0.012	0.05085	0.026	1e-05
YGR168C	YGR168C		0.92349	0.091	0.91942	0.013	0.00644	0.091	0.00026
YGR169C	PUS6		1.07738	0.02	1.0478	0.046	0.03572	0.02	0
YGR170W	PSD2		0.92099	0.079	1.03299	0.013	-0.11443	0.079	0.00017
YGR173W	RBG2		1.10481	0.028	1.0198	0.029	0.0806	0.028	0
YGR174C	CBP4		0.91515	0.05	0.75612	0.064	0.17328	0.05	5e-05
YGR176W	YGR176W		1.03649	0.025	1.19045	0.049	-0.1518	0.025	0
YGR177C	ATF2		1.0496	0.027	1.12022	0.053	-0.06	0.027	0.00023	status=JK
YGR178C	PBP1		0.99253	0.121	1.10689	0.021	-0.11728	0.121	0.00049
YGR181W	TIM13		0.93929	0.041	0.9222	0.031	0.01496	0.041	0.00064	status=JK
YGR182C	YGR182C		0.90529	0.076	0.82703	0.052	0.07014	0.076	0.00016
YGR183C	QCR9		1.06611	0.034	0.82609	0.038	0.24681	0.034	1e-05
YGR184C	UBR1		0.94131	0.003	1.06565	0.033	-0.12416	0.003	0	status=JK
YGR187C	HGH1		1.05393	0.039	1.02238	0.036	0.01743	0.039	0.00045	status=JK
YGR188C	BUB1		0.63096	0.01	0.52883	0.071	0.09374	0.01	8e-05	status=JK
YGR189C	CRH1		1.02999	0.049	1.11156	0.071	-0.07863	0.049	3e-05
YGR192C	TDH3		0.96099	0.012	1.04676	0.017	-0.09172	0.012	5e-05	status=JK
YGR193C	PDX1		1.02191	0.009	1.08016	0.068	-0.04665	0.009	3e-05	status=JK
YGR194C	XKS1		0.95001	0.022	1.00496	0.028	-0.05843	0.022	0.00018	status=JK
YGR196C	FYV8		1.06542	0.03	1.04583	0.054	0.02113	0.03	0.00026	status=JK
YGR197C	SNG1		0.99785	0.124	1.11929	0.052	-0.12605	0.124	0.00052
YGR199W	PMT6		1.05603	0.128	1.17624	0.067	-0.11601	0.128	0.00048
YGR200C	ELP2		0.89221	0.033	0.86811	0.012	0.01967	0.033	1e-05
YGR201C	YGR201C		1.07808	0.002	1.17301	0.005	-0.09756	0.002	0	status=JK
YGR202C	PCT1		1.03998	0.025	1.18365	0.049	-0.14463	0.024	0
YGR203W	YCH1		1.01152	0.077	0.96721	0.026	0.04189	0.077	0.00012
YGR205W	TDA10		1.07019	0.029	1.08782	0.048	-0.02599	0.029	0.00025	status=JK
YGR206W	MVB12		0.89226	0.148	0.89139	0.005	-0.00389	0.147	0.00122
YGR207C	CIR1		1.07461	0.004	1.28069	0.003	-0.21159	0.004	1e-05	status=JK
YGR208W	SER2		1.14613	0.122	1.17451	0.117	-0.05599	0.122	0.00033
YGR209C	TRX2		0.96197	0.08	0.98572	0.059	-0.03092	0.08	0.00016
YGR210C	YGR210C		1.04141	0.141	1.07342	0.061	-0.05191	0.14	0.00067
YGR212W	SLI1		1.05641	0.109	1.20809	0.011	-0.16065	0.109	0.0003
YGR213C	RTA1		1.07115	0.03	1.14475	0.023	-0.06415	0.03	1e-05
YGR214W	RPS0A		0.9554	0.037	0.94037	0.03	0.01319	0.037	2e-05
YGR217W	CCH1		0.98093	0.079	0.95647	0.01	0.02001	0.079	0.00014
YGR221C	TOS2		0.9829	0.055	0.94413	0.006	0.03597	0.055	5e-05
YGR223C	HSV2		0.94804	0.072	0.91144	0.052	0.03564	0.072	0.00012
YGR224W	AZR1		1.03259	0.012	1.11313	0.003	-0.08487	0.012	4e-05	status=JK
YGR225W	AMA1		0.88489	0.032	0.94949	0.035	-0.05896	0.032	0.00045	status=JK
YGR226C	YGR226C		0.93318	0.169	1.00898	0.056	-0.08783	0.168	0.00158
YGR227W	DIE2		0.93805	0.114	1.13818	0.062	-0.20962	0.114	0.00049
YGR228W	YGR228W		0.94988	0.042	1.03237	0.021	-0.08524	0.042	2e-05
YGR229C	SMI1		0.88429	0.112	0.83354	0.05	0.04672	0.112	0.00056
YGR230W	BNS1		1.13682	0.068	1.20199	0.026	-0.06221	0.068	6e-05
YGR231C	PHB2		0.87121	0.059	0.717	0.014	0.15139	0.059	9e-05
YGR232W	NAS6		1.03473	0.004	1.05581	0.052	-0.03253	0.004	1e-05	status=JK
YGR233C	PHO81		1.02431	0.15	0.99979	0.043	0.01311	0.15	0.00085
YGR234W	YHB1		1.13205	0.118	1.22583	0.018	-0.09442	0.118	0.00031
YGR235C	MOS2		1.06777	0.078	1.09033	0.03	-0.02024	0.078	0.00011
YGR236C	SPG1		1.03103	0.067	0.96035	0.02	0.06989	0.066	7e-05
YGR237C	YGR237C		1.05307	0.095	1.05271	0.101	-0.01503	0.095	0.0002
YGR238C	KEL2		1.04657	0.168	0.94524	0.086	0.07212	0.167	0.00111
YGR239C	PEX21		1.0074	0.056	0.90774	0.008	0.09561	0.056	5e-05
YGR241C	YAP1802		1.01608	0.023	1.0981	0.02	-0.08668	0.023	0.00017	status=JK
YGR242W	YGR242W		1.04604	0.129	1.14441	0.03	-0.1087	0.128	0.0005
YGR243W	FMP43		1.16617	0.06	1.15372	0.006	0.00856	0.06	4e-05
YGR244C	LSC2		1.03588	0.093	1.13133	0.046	-0.11162	0.093	0.0002
YGR247W	CPD1		1.02619	0.13	1.00377	0.014	0.0257	0.13	0.00055
YGR248W	SOL4		0.98789	0.202	0.94549	0.015	0.04311	0.202	0.00227
YGR249W	MGA1		1.05366	0.108	1.15285	0.036	-0.10273	0.107	0.00029
YGR250C	YGR250C		0.92674	0.028	0.81213	0.074	0.10682	0.028	1e-05
YGR254W	ENO1		1.06251	0.096	1.01406	0.186	0.05483	0.096	0.0002
YGR255C	COQ6		1.00329	0.158	1.01606	0.024	-0.00903	0.157	0.00105
YGR256W	GND2		0.94608	0.135	1.04471	0.033	-0.10108	0.135	0.00079
YGR259C	YGR259C		0.92845	0.129	0.95365	0.099	-0.02313	0.129	0.00072
YGR260W	TNA1		1.0276	0.062	0.98026	0.043	0.04118	0.062	6e-05
YGR261C	APL6		1.03555	0.07	1.12811	0.027	-0.09401	0.07	8e-05
YGR263C	SAY1		1.08304	0.016	1.14536	0.019	-0.06041	0.016	7e-05	status=JK
YGR266W	YGR266W		0.93505	0.033	0.91377	0.104	-0.00088	0.033	1e-05
YGR268C	HUA1		0.94414	0.13	1.14482	0.009	-0.20724	0.13	0.0007
YGR269W	YGR269W		0.95981	0.13	0.91673	0.067	0.02177	0.129	0.00067
YGR270W	YTA7		0.50353	0.049	0.57411	0.059	-0.08449	0.049	0.00025
YGR271W	SLH1		1.15488	0.065	1.16214	0.039	-0.02633	0.065	5e-05
YGR272C	YGR272C		0.98213	0.071	1.00033	0.055	-0.01118	0.071	0.0001
YGR273C	YGR273C		1.11337	0.1	1.11094	0.18	-0.0242	0.1	0.0002
YGR275W	RTT102		1.11137	0.007	0.84896	0.049	0.26569	0.007	1e-05	status=JK
YGR276C	RNH70		1.00229	0.2	0.99633	0.085	-0.01547	0.2	0.00212
YGR279C	SCW4		0.78074	0.292	0.79266	0.22	0.0177	0.292	0.01283
YGR281W	YOR1		1.01254	0.02	0.96338	0.017	0.04075	0.02	0.00014	status=JK
YGR282C	BGL2		1.21092	0.044	1.06908	0.053	0.12698	0.044	1e-05
YGR283C	YGR283C		0.94351	0.074	1.04227	0.041	-0.10882	0.073	0.00013
YGR284C	ERV29		1.02216	0.021	1.08337	0.038	-0.0691	0.021	0.00014	status=JK
YGR286C	BIO2		1.01427	0.01	0.95102	0.039	0.0546	0.01	3e-05	status=JK
YGR287C	IMA1		1.06836	0.028	0.94735	0.01	0.12281	0.028	0
YGR288W	MAL13		0.99467	0.043	0.99397	0.045	-0.00109	0.043	2e-05
YGR289C	MAL11		1.0254	0.014	0.92572	0.114	0.11306	0.014	7e-05	status=JK
YGR290W	YGR290W		1.11981	0.085	1.13008	0.031	-0.01788	0.084	0.00012
YGR291C	YGR291C		1.11163	0.099	#NUM!	#NUM!	#NUM!	#NUM!	0.00019
YGR292W	MAL12		1.11323	0.078	1.16605	0.03	-0.05749	0.078	0.0001
YGR295C	COS6		1.05302	0.068	0.94686	0.025	0.1047	0.068	7e-05
YHL002W	HSE1		0.94002	0.153	0.91559	0.03	0.02294	0.152	0.00115
YHL003C	LAG1		1.04874	0.155	0.93575	0.027	0.11136	0.155	0.00087
YHL005C	YHL005C		0.8991	0.063	0.84144	0.03	0.04885	0.063	0.0001
YHL006C	SHU1		1.04739	0.046	0.951	0.054	0.09589	0.046	0.00063	status=JK
YHL007C	STE20		0.0382	0.002	0.53977	0.031	-0.48855	0.002	0.00083	status=JK
YHL008C	YHL008C		1.02917	0.116	1.03622	0.03	-0.01536	0.116	0.00039
YHL009C	YAP3		1.02006	0.033	1.03115	0.022	-0.01782	0.033	1e-05
YHL010C	ETP1		1.06516	0.058	1.00557	0.059	0.04449	0.058	4e-05
YHL012W	YHL012W		1.0639	0.07	1.02087	0.039	0.02837	0.07	8e-05
YHL013C	OTU2		1.06555	0.091	1.01375	0.092	0.06721	0.091	0.00017
YHL014C	YLF2		1.04076	0.065	1.07621	0.044	-0.0317	0.065	7e-05
YHL016C	DUR3		0.93588	0.098	0.97007	0.084	-0.03408	0.098	0.00031
YHL017W	YHL017W		1.05783	0.019	0.98133	0.044	0.06176	0.019	0.00011	status=JK
YHL019C	APM2		1.03651	0.094	1.04357	0.02	-0.00983	0.094	0.0002
YHL020C	OPI1		0.73525	0.016	0.7875	0.106	-0.05286	0.016	0.00016	status=JK
YHL021C	AIM17		1.02807	0.05	0.97408	0.027	0.0633	0.05	0.00079	status=JK
YHL022C	SPO11		1.12562	0.052	1.02347	0.047	0.11172	0.052	3e-05
YHL023C	NPR3		0.79977	0.089	0.81258	0.067	-0.0338	0.089	0.00038
YHL024W	RIM4		0.95635	0.028	1.02191	0.004	-0.06635	0.028	1e-05
YHL025W	SNF6		0.98108	0.107	0.99022	0.064	0.00045	0.107	0.00394	status=JK
YHL026C	YHL026C		0.94423	0.145	0.98874	0.015	-0.0462	0.145	0.00098
YHL027W	RIM101		0.74058	0.196	0.71964	0.082	0.02172	0.196	0.00481
YHL028W	WSC4		1.04235	0.062	0.97283	0.029	0.06677	0.062	0.00119	status=JK
YHL029C	OCA5		0.93108	0.05	0.81604	0.105	0.10256	0.05	0.00096	status=JK
YHL030W	ECM29		1.08817	0.09	1.02065	0.015	0.06031	0.089	0.00015
YHL031C	GOS1		0.70283	0.004	0.73104	0.038	-0.03004	0.004	1e-05	status=JK
YHL032C	GUT1		0.92832	0.159	0.94295	0.033	-0.01906	0.159	0.00135
YHL033C	RPL8A		0.81365	0.088	0.79162	0.062	0.02548	0.087	0.00034
YHL034C	SBP1		0.9579	0.074	0.94172	0.023	0.0083	0.074	0.00013
YHL035C	VMR1		1.01809	0.054	1.07042	0.067	-0.07134	0.053	4e-05
YHL036W	MUP3		1.01792	0.003	1.08837	0.035	-0.07508	0.003	0	status=JK
YHL037C	YHL037C		1.04345	0.023	0.94894	0.137	0.05947	0.023	0.00016	status=JK
YHL039W	EFM1		0.92407	0.136	1.00605	0.074	-0.0898	0.136	0.00087
YHL040C	ARN1		1.02628	0.089	0.97682	0.064	0.05557	0.089	0.00018
YHL041W	YHL041W		0.91499	0.168	0.8794	0.027	0.0284	0.168	0.00167
YHL042W	YHL042W		1.08997	0.03	1.02845	0.021	0.05263	0.03	0.00025	status=JK
YHL043W	ECM34		1.11144	0.042	0.98175	0.014	0.12551	0.042	1e-05
YHL044W	YHL044W		1.02438	0.087	0.96546	0.079	0.05899	0.087	0.00017
YHL045W	YHL045W		1.0038	0.065	1.02643	0.076	-0.04015	0.065	7e-05
YHL046C	PAU13		1.00113	0.095	1.02592	0.064	-0.03482	0.095	0.00023
YHL047C	ARN2		1.03254	0.064	1.01212	0.061	0.00184	0.063	6e-05
YHR001W-A	QCR10		1.03136	0.036	1.00945	0.027	0.01949	0.036	1e-05
YHR003C	YHR003C		0.90166	0.058	0.95887	0.011	-0.0543	0.058	0.00139	status=JK
YHR004C	NEM1		0.89542	0.121	0.99096	0.04	-0.09986	0.12	0.00066
YHR005C	GPA1		0.02923	0.005	0.0215	0.001	0.00808	0.005	0.00115
YHR006W	STP2		1.05406	0.078	1.09137	0.039	-0.04916	0.078	0.00011
YHR008C	SOD2		0.92467	0.023	0.86863	0.11	0.07383	0.023	0.00021	status=JK
YHR009C	TDA3		0.94084	0.049	1.0002	0.038	-0.06258	0.049	4e-05
YHR012W	VPS29		0.88933	0.104	0.76203	0.08	0.13056	0.104	0.00043
YHR014W	SPO13		0.79646	0.143	0.80395	0.02	-0.01174	0.143	0.00156
YHR015W	MIP6		1.04952	0.047	1.03089	0.007	0.01909	0.047	3e-05
YHR016C	YSC84		1.15094	0.012	1.09917	0.05	0.03944	0.012	3e-05	status=JK
YHR017W	YSC83		0.95054	0.129	0.77726	0.056	0.16814	0.129	0.00068
YHR018C	ARG4		0.42195	0.112	0.25666	0.021	0.16024	0.112	0.00487
YHR021C	RPS27B		0.68435	0.082	0.61823	0.037	0.06672	0.082	0.00047
YHR021W-A	ECM12		0.97637	0.139	1.15968	0.07	-0.17282	0.138	0.00077
YHR022C	YHR022C		1.01326	0.094	0.81591	0.183	0.14813	0.093	0.00022
YHR025W	THR1		0.55309	0.112	0.50073	0.04	0.04819	0.112	0.00223
YHR028C	DAP2		1.02061	0.044	0.90724	0.068	0.10181	0.044	0.00063	status=JK
YHR029C	YHI9		1.03773	0.136	0.99249	0.012	0.04381	0.136	0.00061
YHR030C	SLT2		1.08069	0.087	0.96111	0.031	0.12382	0.087	0.00014
YHR031C	RRM3		1.0499	0.078	0.99658	0.016	0.05487	0.078	0.00011
YHR032W	ERC1		1.01022	0.147	1.14724	0.041	-0.1323	0.147	0.00084
YHR033W	YHR033W		0.9515	0.023	0.91416	0.062	0.03535	0.023	0.00019	status=JK
YHR034C	PIH1		0.91065	0.021	0.85519	0.127	0.06671	0.021	0.00018	status=JK
YHR035W	YHR035W		0.94714	0.022	1.0489	0.094	-0.11935	0.022	0.00018	status=JK
YHR037W	PUT2		1.02927	0.13	0.98423	0.041	0.03636	0.13	0.00055
YHR039C	MSC7		0.96929	0.104	0.97609	0.069	-0.00697	0.104	0.00382	status=JK
YHR041C	SRB2		0.3497	0.019	0.27922	0.037	0.05886	0.019	0.00096	status=JK
YHR043C	DOG2		0.97993	0.149	1.02871	0.023	-0.05184	0.149	0.00096
YHR044C	DOG1		1.05485	0.187	0.94957	0.04	0.10191	0.186	0.00148
YHR045W	YHR045W		1.08812	0.142	1.05675	0.05	0.02101	0.142	0.00061
YHR046C	INM1		0.80106	0.036	0.96726	0.058	-0.16427	0.036	0.00067	status=JK
YHR047C	AAP1		1.02846	0.018	1.01974	0.051	-0.00454	0.018	0.0001	status=JK
YHR048W	YHK8		0.93838	0.088	0.95216	0.063	-0.02205	0.087	0.00022
YHR049C-A	YHR049C-A		1.10484	0.018	1.0515	0.03	0.04545	0.018	0
YHR049W	FSH1		0.94931	0.063	0.94778	0.038	0.01031	0.063	8e-05
YHR050W	SMF2		0.98078	0.121	1.02704	0.056	-0.04529	0.121	0.00052
YHR057C	CPR2		1.02356	0.072	1.09828	0.049	-0.08663	0.072	9e-05
YHR059W	FYV4		0.00587	0.01	0	0	0.00586	0.01	0.42265	status=JK
YHR061C	GIC1		0.12585	0.093	0.26418	0.087	-0.12341	0.093	0.07418
YHR066W	SSF1		0.79067	0.059	0.74811	0.035	0.03428	0.058	0.00011
YHR067W	HTD2		0.70082	0.023	0.55966	0.065	0.12991	0.023	0.00035	status=JK
YHR073W	OSH3		1.20275	0.007	1.11274	0.029	0.09309	0.007	1e-05	status=JK
YHR075C	PPE1		0.9387	0.119	1.01866	0.05	-0.09351	0.118	0.00055
YHR076W	PTC7		0.97451	0.049	0.92422	0.028	0.05171	0.048	3e-05
YHR077C	NMD2		0.94501	0.122	0.93916	0.047	0.00226	0.122	0.00059
YHR078W	YHR078W		1.23954	0.116	1.1716	0.063	0.04513	0.116	0.00022
YHR079C	IRE1		1.11368	0.021	0.9969	0.013	0.11643	0.021	0.00012	status=JK
YHR079C-B	YHR079C-B		1.12524	0.059	1.05568	0.035	0.06965	0.059	4e-05
YHR080C	YHR080C		1.02794	0.063	1.02323	0.08	0.01534	0.063	6e-05
YHR081W	LRP1		0.74748	0.03	0.72761	0.072	-0.00782	0.03	2e-05
YHR082C	KSP1		1.10799	0.03	0.93915	0.019	0.16562	0.03	0.00024	status=JK
YHR086W	NAM8		1.16528	0.015	1.11454	0.016	0.04994	0.015	0
YHR087W	RTC3		1.08755	0.017	1.06403	0.013	0.01521	0.017	9e-05	status=JK
YHR092C	HXT4		1.05007	0.056	1.02927	0.012	0.02412	0.055	4e-05
YHR093W	YHR093W		1.05374	0.092	1.00456	0.025	0.05224	0.092	0.00018
YHR094C	HXT1		1.00559	0.061	1.07082	0.006	-0.07065	0.061	6e-05
YHR095W	YHR095W		1.17874	0.021	1.10511	0.064	0.08001	0.021	0.00011	status=JK
YHR096C	HXT5		0.96054	0.105	0.98797	0.048	-0.02621	0.105	0.00036
YHR097C	YHR097C		0.99547	0.068	1.0279	0.014	-0.03374	0.068	9e-05
YHR103W	SBE22		0.92141	0.046	0.95817	0.03	-0.04052	0.046	4e-05
YHR104W	GRE3		1.0351	0.022	1.02939	0.019	0.00267	0.022	0
YHR105W	YPT35		0.95815	0.021	0.99724	0.02	-0.05206	0.021	0.00016	status=JK
YHR106W	TRR2		1.12877	0.103	1.03746	0.08	0.10386	0.103	0.00021
YHR108W	GGA2		0.96845	0.089	0.92043	0.098	0.02446	0.089	0.00022
YHR109W	CTM1		0.97593	0.081	0.99898	0.042	-0.02538	0.081	0.00016
YHR110W	ERP5		1.0412	0.079	1.04724	0.071	0.00962	0.078	0.00012
YHR111W	UBA4		0.97871	0.045	0.93645	0.041	0.03153	0.045	3e-05
YHR112C	YHR112C		0.94733	0.027	1.05103	0.013	-0.10287	0.027	0.00028	status=JK
YHR113W	APE4		0.95818	0.116	0.95048	0.062	0.01727	0.115	0.00048
YHR114W	BZZ1		1.15131	0.081	1.13178	0.07	0.01239	0.081	0.0001
YHR115C	DMA1		1.05575	0.061	1.00471	0.034	0.04734	0.061	5e-05
YHR116W	COX23		0.90105	0.044	0.79791	0.034	0.09545	0.044	0.00081	status=JK
YHR117W	TOM71		0.99059	0.061	0.9609	0.015	0.02547	0.061	0.00127	status=JK
YHR121W	LSM12		0.85409	0.175	0.9678	0.034	-0.11473	0.175	0.00229
YHR123W	EPT1		1.08055	0.06	0.98328	0.033	0.09297	0.06	5e-05
YHR124W	NDT80		1.00731	0.122	0.96944	0.033	0.03476	0.122	0.00048
YHR125W	YHR125W		0.97374	0.092	1.01501	0.034	-0.04136	0.092	0.00023
YHR126C	ANS1		0.99106	0.058	0.9769	0.039	0.0088	0.058	6e-05
YHR127W	YHR127W		0.82526	0.034	1.01789	0.076	-0.19699	0.034	0.00058	status=JK
YHR129C	ARP1		0.98401	0.103	0.96629	0.068	0.00397	0.102	0.00031
YHR130C	YHR130C		0.98123	0.114	0.99739	0.029	-0.03575	0.114	0.00043
YHR131C	YHR131C		0.93367	0.093	1.04556	0.025	-0.12061	0.093	0.00027
YHR132C	ECM14		0.98409	0.117	1.11214	0.028	-0.12625	0.117	0.00046
YHR132W-A	IGO2		0.95908	0.058	0.95185	0.003	0.00287	0.058	6e-05
YHR133C	NSG1		0.96369	0.149	0.96711	0.029	-0.01613	0.149	0.001
YHR134W	WSS1		0.79417	0.083	0.88313	0.034	-0.08852	0.083	0.00031
YHR135C	YCK1		0.92575	0.153	1.00488	0.031	-0.08659	0.153	0.00122
YHR136C	SPL2		1.06946	0.047	1.09944	0.032	-0.02757	0.047	2e-05
YHR137W	ARO9		1.21008	0.038	1.05141	0.032	0.15313	0.038	1e-05
YHR138C	YHR138C		1.18261	0.011	1.11216	0.029	0.07187	0.011	3e-05	status=JK
YHR139C	SPS100		0.95292	0.1	1.01386	0.094	-0.05189	0.099	0.00031
YHR139C-A	YHR139C-A		1.08458	0.049	1.10431	0.036	-0.02071	0.049	3e-05
YHR140W	YHR140W		1.01538	0.111	1.04372	0.018	-0.02452	0.111	0.00036
YHR142W	CHS7		1.09752	0.032	1.09879	0.044	-0.00216	0.032	1e-05
YHR143W	DSE2		0.65974	0.178	0.73987	0.075	-0.09323	0.177	0.00504
YHR146W	CRP1		1.07112	0.079	1.15876	0.038	-0.08811	0.079	0.00011
YHR150W	PEX28		1.04724	0.025	1.02786	0.04	0.01467	0.025	0
YHR151C	MTC6		1.02547	0.035	0.98495	0.043	0.0274	0.034	1e-05
YHR152W	SPO12		0.94502	0.152	1.10939	0.035	-0.17491	0.152	0.00112
YHR153C	SPO16		1.06011	0.006	1.03094	0.04	0.02407	0.006	1e-05	status=JK
YHR154W	RTT107		1.03471	0.07	0.96125	0.061	0.06481	0.069	8e-05
YHR155W	YSP1		1.01336	0.107	1.13475	0.053	-0.13202	0.106	0.00032
YHR156C	LIN1		0.89788	0.056	0.88115	0.016	0.02164	0.056	7e-05
YHR157W	REC104		1.10806	0.066	1.0297	0.037	0.08514	0.066	0.00119	status=JK
YHR158C	KEL1		0.71168	0.205	0.76487	0.023	-0.0607	0.205	0.00613
YHR159W	TDA11		1.0388	0.011	1.02099	0.045	0.00896	0.011	4e-05	status=JK
YHR160C	PEX18		1.03108	0.109	1.07535	0.049	-0.03564	0.108	0.00032
YHR161C	YAP1801		1.06051	0.03	0.99897	0.029	0.06232	0.03	0.00026	status=JK
YHR162W	MPC2		1.07467	0.011	1.00271	0.028	0.07319	0.011	3e-05	status=JK
YHR163W	SOL3		0.84769	0.125	0.90088	0.029	-0.04897	0.124	0.00086
YHR167W	THP2		1.01894	0.003	0.90779	0.024	0.11278	0.003	0	status=JK
YHR171W	ATG7		0.9139	0.082	0.92157	0.017	-0.00891	0.082	0.0002
YHR176W	FMO1		1.08858	0.124	1.00951	0.006	0.07329	0.124	0.0004
YHR178W	STB5		0.66962	0.125	0.50652	0.016	0.15638	0.124	0.00172
YHR179W	OYE2		1.05706	0.009	1.0601	0.03	-0.00235	0.009	2e-05	status=JK
YHR180W	YHR180W		1.26674	0.077	1.25255	0.049	0.01106	0.077	6e-05
YHR181W	SVP26		1.14953	0.013	1.17725	0.004	-0.03023	0.013	0
YHR182W	YHR182W		1.13758	0.11	1.14169	0.06	-0.02266	0.11	0.00025
YHR184W	SSP1		1.24329	0.057	1.00681	0.041	0.23375	0.057	3e-05
YHR185C	PFS1		0.9995	0.081	0.95363	0.036	0.03763	0.081	0.00015
YHR189W	PTH1		0.88041	0.037	0.6736	0.004	0.20567	0.036	2e-05
YHR191C	CTF8		0.95591	0.09	1.00135	0.043	-0.04306	0.09	0.00023
YHR193C	EGD2		0.04604	0.011	0	0	0.04595	0.011	0.00392
YHR194W	MDM31		0.08358	0.01	0.36642	0.22	-0.2489	0.01	0.00471	status=JK
YHR195W	NVJ1		0.93536	0.127	1.06355	0.022	-0.13098	0.127	0.00068
YHR198C	AIM18		0.87225	0.088	0.65706	0.012	0.21179	0.088	0.00028
YHR199C	AIM46		1.01328	0.119	1.00247	0.004	0.00726	0.119	0.00044
YHR200W	RPN10		0.90611	0.095	0.94565	0.024	-0.03859	0.095	0.00032
YHR202W	YHR202W		0.91685	0.135	1.04232	0.016	-0.13441	0.135	0.00086
YHR203C	RPS4B		0.71072	0.064	0.78021	0.054	-0.06422	0.064	0.0002
YHR204W	MNL1		0.95063	0.107	1.01402	0.052	-0.08102	0.107	0.00039
YHR206W	SKN7		1.04109	0.019	1.06556	0.007	-0.02453	0.019	0
YHR207C	SET5		1.04922	0.023	0.99199	0.011	0.05315	0.023	0
YHR209W	CRG1		1.02687	0.019	0.98407	0.002	0.03997	0.019	0.00011	status=JK
YHR210C	YHR210C		1.02302	0.028	0.98314	0.048	0.03068	0.028	0.00025	status=JK
YIL001W	YIL001W		1.05136	0.052	1.03482	0.019	0.00944	0.052	3e-05
YIL002C	INP51		0.99455	0.061	0.90492	0.019	0.08022	0.061	6e-05
YIL005W	EPS1		0.90674	0.092	0.99703	0.071	-0.10632	0.092	0.00028
YIL006W	YIA6		0.88916	0.01	0.87817	0.002	0.00809	0.01	4e-05	status=JK
YIL007C	NAS2		1.04323	0.041	0.91131	0.005	0.13045	0.041	2e-05
YIL008W	URM1		0.88138	0.061	0.85334	0.048	0.0157	0.061	9e-05
YIL009C-A	EST3		1.09191	0.095	1.05649	0.04	0.02957	0.095	0.00018
YIL010W	DOT5		1.05499	0.083	1.0137	0.014	0.03121	0.082	0.00013
YIL011W	TIR3		0.02346	0.003	0.00035	0	0.02307	0.003	0.00381	status=JK
YIL012W	YIL012W		1.06301	0.066	1.07493	0.007	-0.01374	0.065	0.00126	status=JK
YIL013C	PDR11		1.03315	0.144	1.14438	0.071	-0.12834	0.144	0.00073
YIL014W	MNT3		0.98751	0.074	1.06924	0.02	-0.08537	0.074	0.00011
YIL015C-A	YIL015C-A		1.02918	0.022	0.94929	0.004	0.07668	0.022	0.00015	status=JK
YIL015W	BAR1		0.9544	0.041	0.9582	0.013	-0.00724	0.041	2e-05
YIL016W	SNL1		1.05118	0.055	1.14917	0.029	-0.09875	0.055	4e-05
YIL017C	VID28		0.9783	0.128	0.99165	0.06	-0.01883	0.127	0.0006
YIL020C	HIS6		0.56144	0.103	0.31988	0.044	0.23519	0.102	0.00163
YIL023C	YKE4		0.99735	0.018	1.04171	0.007	-0.04393	0.018	0.0001	status=JK
YIL024C	YIL024C		1.0899	0.035	1.16939	0.007	-0.08382	0.035	1e-05
YIL025C	YIL025C		0.99988	0.012	0.99503	0.036	0.00887	0.012	5e-05	status=JK
YIL027C	EMC5		1.06352	0.061	1.06461	0.069	-0.01786	0.061	5e-05
YIL028W	YIL028W		1.02476	0.046	0.97187	0.041	0.05641	0.045	2e-05
YIL029C	YIL029C		1.06111	0.01	0.93206	0.059	0.12223	0.01	3e-05	status=JK
YIL030C	SSM4		0.94525	0.032	1.09967	0.04	-0.16983	0.032	1e-05
YIL032C	YIL032C		1.03047	0.059	0.94175	0.018	0.08368	0.059	5e-05
YIL034C	CAP2		1.15911	0.042	1.05984	0.093	0.09889	0.041	0.00043	status=JK
YIL035C	CKA1		1.00199	0.036	1.03522	0.038	-0.03545	0.036	1e-05
YIL036W	CST6		0.9304	0.103	0.93097	0.091	0.01411	0.103	0.00037
YIL037C	PRM2		1.02147	0.07	0.92302	0.023	0.09377	0.07	9e-05
YIL038C	NOT3		0.91885	0.122	0.97768	0.033	-0.06884	0.122	0.00063
YIL039W	TED1		1.09406	0.026	0.96083	0.037	0.1239	0.026	0
YIL040W	APQ12		0.44492	0.047	0.28888	0.015	0.1557	0.047	0.00033
YIL041W	GVP36		0.94531	0.144	0.89396	0.109	0.05231	0.144	0.00096
YIL042C	PKP1		1.02843	0.111	0.91304	0.042	0.12107	0.111	0.00035
YIL043C	CBR1		1.15855	0.09	1.15053	0.062	0.00075	0.09	0.00013
YIL044C	AGE2		0.91434	0.097	0.81646	0.03	0.09545	0.097	0.00032
YIL045W	PIG2		0.92885	0.099	1.11948	0.014	-0.19219	0.099	0.00033
YIL047C	SYG1		1.01839	0.079	1.09669	0.022	-0.084	0.078	0.00013
YIL049W	DFG10		0.99631	0.075	0.99404	0.023	-0.00033	0.074	0.00011
YIL050W	PCL7		1.05911	0.021	1.03247	0.057	0.02438	0.021	0
YIL052C	RPL34B		0.84268	0.141	0.98657	0.045	-0.14945	0.14	0.00125
YIL053W	RHR2		0.89392	0.106	0.75663	0.013	0.13574	0.106	0.00045
YIL054W	YIL054W		1.05472	0.04	1.06701	0.049	0.00134	0.04	0.00048	status=JK
YIL055C	YIL055C		1.0168	0.074	0.97169	0.053	0.03176	0.074	0.00011
YIL056W	VHR1		0.92075	0.068	0.88361	0.086	0.01962	0.068	0.00011
YIL057C	RGI2		1.0477	0.131	1.06478	0.01	-0.0228	0.131	0.00053
YIL058W	YIL058W		1.00481	0.139	1.00038	0.018	0.00125	0.139	0.00072
YIL059C	YIL059C		1.03213	0.098	1.0185	0.041	0.00711	0.098	0.00024
YIL060W	YIL060W		1.00822	0.024	1.04981	0.026	-0.04625	0.024	0
YIL064W	SEE1		0.9148	0.033	0.8974	0.04	0.02276	0.033	1e-05
YIL065C	FIS1		0.81263	0.075	0.7654	0.022	0.05215	0.075	0.00022
YIL066C	RNR3		1.05543	0.011	1.03215	0.013	0.0213	0.011	4e-05	status=JK
YIL067C	YIL067C		0.88591	0.068	0.9293	0.072	-0.02993	0.068	0.00012
YIL070C	MAM33		1.0487	0.017	1.04772	0.027	0.00568	0.017	0
YIL071C	PCI8		1.16216	0.025	1.05938	0.054	0.11556	0.025	0
YIL072W	HOP1		1.05241	0.068	1.07632	0.01	-0.02648	0.068	7e-05
YIL073C	SPO22		0.87704	0.062	0.83241	0.065	0.04926	0.062	0.0001
YIL074C	SER33		1.09172	0.023	1.01461	0.028	0.08447	0.023	0.00014	status=JK
YIL076W	SEC28		1.02283	0.079	1.01382	0.027	0.00928	0.079	0.00013
YIL077C	YIL077C		0.8517	0.067	0.86907	0.03	-0.02086	0.066	0.00013
YIL079C	AIR1		1.05605	0.075	1.08652	0.048	-0.02797	0.075	0.0001
YIL084C	SDS3		0.85126	0.008	0.72957	0.066	0.10866	0.008	3e-05	status=JK
YIL085C	KTR7		1.00048	0.071	0.92747	0.163	0.10583	0.07	0.0001
YIL086C	YIL086C		0.97264	0.011	0.8777	0.021	0.09655	0.011	4e-05	status=JK
YIL087C	AIM19		1.06846	0.028	0.96984	0.007	0.10012	0.028	1e-05
YIL088C	AVT7		1.04522	0.042	1.03207	0.007	0.01687	0.042	2e-05
YIL089W	YIL089W		1.10633	0.062	1.11713	0.045	-0.01938	0.062	5e-05
YIL090W	ICE2		0.63507	0.06	0.55476	0.04	0.08626	0.06	0.00023
YIL092W	YIL092W		0.90531	0.104	0.92272	0.013	-0.01327	0.104	0.00042
YIL093C	RSM25		1.03503	0.013	1.0477	0.031	-0.01064	0.013	6e-05	status=JK
YIL094C	LYS12		0.56244	0.034	0.33846	0.118	0.23778	0.033	0.00118	status=JK
YIL095W	PRK1		1.04645	0.022	1.08057	0.012	-0.03802	0.022	0.00015	status=JK
YIL096C	YIL096C		1.04468	0.106	1.06216	0.034	-0.01741	0.105	0.00028
YIL097W	FYV10		0.93435	0.037	0.90925	0.038	0.02958	0.037	2e-05
YIL098C	FMC1		0.99338	0.009	0.86228	0.038	0.12643	0.009	3e-05	status=JK
YIL099W	SGA1		1.08215	0.053	1.09152	0.046	-0.00615	0.053	3e-05
YIL100W	YIL100W		1.04196	0.032	1.0339	0.035	0.02643	0.032	0.00031	status=JK
YIL101C	XBP1		0.9699	0.098	1.00023	0.043	-0.03869	0.098	0.00028
YIL102C	YIL102C		1.05034	0.065	1.10872	0.058	-0.07228	0.065	7e-05
YIL103W	DPH1		0.96717	0.054	0.99493	0.059	-0.04086	0.054	5e-05
YIL105C	SLM1		1.06359	0.095	1.06828	0.045	-0.00459	0.094	0.00019
YIL107C	PFK26		0.94482	0.068	1.04102	0.068	-0.09649	0.067	0.0001
YIL108W	YIL108W		1.05982	0.012	1.02104	0.056	0.03854	0.012	5e-05	status=JK
YIL110W	HPM1		0.7601	0.037	0.72462	0.015	0.03335	0.037	3e-05
YIL111W	COX5B		1.02298	0.057	0.89752	0.111	0.10102	0.057	5e-05
YIL112W	HOS4		0.91875	0.083	0.90599	0.008	0.00998	0.083	0.0002
YIL113W	SDP1		0.96233	0.082	0.95172	0.009	0.00942	0.082	0.00017
YIL114C	POR2		1.04852	0.046	1.03568	0.043	0.02489	0.046	2e-05
YIL116W	HIS5		0.58553	0.005	0.33743	0.126	0.23931	0.005	3e-05	status=JK
YIL117C	PRM5		1.00204	0.109	1.04733	0.031	-0.03736	0.109	0.00035
YIL119C	RPI1		1.07008	0.087	1.0192	0.032	0.05164	0.087	0.00015
YIL120W	QDR1		1.08091	0.027	1.03507	0.067	0.05968	0.027	0.00021	status=JK
YIL122W	POG1		0.78947	0.088	0.57485	0.166	0.1915	0.088	0.00038
YIL123W	SIM1		1.03834	0.06	1.04375	0.061	0.00101	0.06	5e-05
YIL124W	AYR1		0.98993	0.067	0.94573	0.051	0.03355	0.066	8e-05
YIL125W	KGD1		0.02701	0.005	0.01709	0.001	0.01008	0.005	0.00182
YIL128W	MET18		0.91661	0.04	0.81432	0.035	0.09474	0.04	2e-05
YIL130W	ASG1		1.04116	0.064	1.02911	0.038	0.01494	0.064	6e-05
YIL131C	FKH1		0.95518	0.115	0.92662	0.219	0.01803	0.115	0.00048
YIL132C	CSM2		0.94989	0.044	0.86662	0.043	0.08045	0.044	3e-05
YIL133C	RPL16A		0.83572	0.075	0.82999	0.015	0.00525	0.075	0.0002
YIL134W	FLX1		0.72709	0.043	0.60675	0.022	0.13175	0.043	6e-05
YIL135C	VHS2		1.08991	0.054	1.21053	0.008	-0.11988	0.054	3e-05
YIL136W	OM45		1.03619	0.143	1.21402	0.077	-0.18624	0.143	0.00071
YIL137C	TMA108		1.00218	0.018	0.89826	0.036	0.10391	0.018	0
YIL138C	TPM2		1.0072	0.101	0.94219	0.046	0.06086	0.101	0.00028
YIL139C	REV7		1.02469	0.049	1.04062	0.086	-0.00131	0.049	3e-05
YIL140W	AXL2		1.06974	0.087	1.10706	0.062	-0.03181	0.087	0.00015
YIL141W	YIL141W		1.04274	0.056	1.14384	0.015	-0.09905	0.056	4e-05
YIL145C	PAN6		0.9805	0.049	0.95049	0.005	0.03287	0.049	3e-05
YIL146C	ATG32		1.04042	0.033	1.05275	0.062	-0.02891	0.033	0.00034	status=JK
YIL148W	RPL40A		1.00576	0.059	0.98326	0.021	0.02805	0.059	5e-05
YIL149C	MLP2		1.01835	0.067	1.01295	0.04	0.00713	0.067	8e-05
YIL151C	YIL151C		0.98138	0.103	0.97636	0.118	0.00632	0.103	0.00032
YIL152W	YIL152W		0.98679	0.059	0.89915	0.018	0.09022	0.059	6e-05
YIL153W	RRD1		0.92479	0.052	0.89236	0.06	0.04622	0.052	5e-05
YIL154C	IMP2'		0.86827	0.004	0.87261	0.035	-0.0063	0.004	1e-05	status=JK
YIL155C	GUT2		0.97339	0.123	0.99454	0.041	-0.01065	0.123	0.00055
YIL156W	UBP7		1.02117	0.033	1.12546	0.019	-0.10478	0.033	1e-05
YIL157C	COA1		0.95651	0.017	0.9606	0.021	-0.01432	0.017	0.0001	status=JK
YIL158W	AIM20		0.98783	0.07	1.10213	0.191	-0.09296	0.07	0.0001
YIL159W	BNR1		0.84281	0.115	0.89661	0.034	-0.03661	0.115	0.00069
[truncated: 2,323 more rows]

## Sheet: DMA LU Rep1
Array ORF	Array Name	Array annotation	Normalized colony size (EXPERIMENT)	Normalized colony std. dev. (EXPERIMENT)	Normalized colony size (CONTROL)	Normalized colony std. dev. (CONTROL)	Score	Score stdev	p-Value	Additional information
YAL002W	VPS8		0.54089	0.086	0.97017	0.111	-0.4388	0.086	0.0011
YAL004W	YAL004W		0.98011	0.106	1.02732	0.031	-0.04409	0.106	0.00035
YAL005C	SSA1		0.94442	0.111	0.96664	0.119	0.00267	0.111	0.00044
YAL007C	ERP2		0.95487	0.019	1.01044	0.093	-0.05409	0.019	0.00013	status=JK
YAL008W	FUN14		1.09133	0.058	1.06374	0.045	0.02675	0.058	4e-05
YAL010C	MDM10		0.79256	0.038	0.75738	0.063	0.01709	0.038	0.00076	status=JK
YAL011W	SWC3		1.07778	0.1	0.96453	0.011	0.11375	0.1	0.00022
YAL013W	DEP1		0.73067	0.167	0.59939	0.048	0.11462	0.167	0.00313
YAL014C	SYN8		1.16342	0.103	1.02224	0.073	0.14478	0.103	0.00019
YAL015C	NTG1		1.0438	0.048	1.01269	0.018	0.03104	0.048	3e-05
YAL017W	PSK1		0.73853	0.016	1.11132	0.092	-0.37181	0.016	0.00016	status=JK
YAL018C	YAL018C		1.05984	0.102	0.97232	0.067	0.06733	0.102	0.00025
YAL019W	FUN30		0.98941	0.02	0.98907	0.115	-0.02256	0.02	0.00013	status=JK
YAL020C	ATS1		1.04339	0.1	0.98354	0.084	0.05152	0.1	0.00024
YAL022C	FUN26		0.99355	0.055	1.00155	0.089	-0.00363	0.055	5e-05
YAL023C	PMT2		1.02535	0.003	1.05447	0.037	-0.03078	0.003	0	status=JK
YAL024C	LTE1		0.72583	0.08	0.91908	0.137	-0.2028	0.08	0.00036
YAL026C	DRS2		0.38534	0.091	0.58809	0.117	-0.2295	0.091	0.00351
YAL027W	SAW1		1.09704	0.07	1.00587	0.074	0.07875	0.07	7e-05
YAL028W	FRT2		0.98698	0.011	1.06259	0.053	-0.10691	0.011	4e-05	status=JK
YAL029C	MYO4		0.95723	0.005	1.03651	0.068	-0.07072	0.005	1e-05	status=JK
YAL030W	SNC1		1.0474	0.002	0.9287	0.033	0.11001	0.002	0	status=JK
YAL031C	GIP4		0.96683	0.05	0.96845	0.018	0.00161	0.05	4e-05
YAL034C	FUN19		1.07934	0.076	1.0813	0.1	-0.02843	0.076	9e-05
YAL036C	RBG1		1.02694	0.079	0.98581	0.05	0.0377	0.079	0.00012
YAL037W	YAL037W		1.06252	0.059	1.03917	0.016	0.02187	0.059	5e-05
YAL040C	CLN3		0.96637	0.011	0.89424	0.05	0.06696	0.011	4e-05	status=JK
YAL042W	ERV46		1.07986	0.071	1.08496	0.007	-0.00689	0.071	0.00144	status=JK
YAL043C-A	YAL043C-A		1.00717	0.042	1.04965	0.054	-0.05239	0.042	2e-05
YAL045C	YAL045C		0.96944	0.025	0.95233	0.078	0.00153	0.025	0.00022	status=JK
YAL046C	AIM1		0.99593	0.017	1.02425	0.042	-0.01082	0.017	0
YAL048C	GEM1		0.95346	0.017	0.95887	0.028	-0.00732	0.017	0
YAL049C	AIM2		0.87748	0.116	1.00744	0.06	-0.13303	0.116	0.00062
YAL051W	OAF1		1.03867	0.035	0.98819	0.08	0.05251	0.035	1e-05
YAL053W	FLC2		1.0371	0.112	1.07134	0.009	-0.04026	0.111	0.00034
YAL054C	ACS1		1.10397	0.062	1.05748	0.069	0.04268	0.062	5e-05
YAL055W	PEX22		1.04929	0.071	1.06451	0.021	-0.01866	0.071	8e-05
YAL056W	GPB2		0.97177	0.09	0.96667	0.052	-0.00381	0.09	0.00022
YAL058C-A	YAL058C-A		0.97552	0.054	1.00556	0.039	-0.03032	0.054	5e-05
YAL058W	CNE1		0.94325	0.067	1.06995	0.017	-0.12756	0.067	0.0001
YAL059W	ECM1		0.87504	0.075	0.90982	0.062	-0.02741	0.075	0.00017
YAL060W	BDH1		1.02668	0.108	0.98946	0.05	0.03043	0.108	0.00032
YAL061W	BDH2		1.12647	0.073	1.07079	0.052	0.05133	0.073	7e-05
YAL062W	GDH3		1.09188	0.096	1.06229	0.026	0.04169	0.095	0.00018
YAL064C-A	TDA8		1.17417	0.041	1.04306	0.03	0.12486	0.04	0.0004	status=JK
YAL065C	YAL065C		1.10786	0.007	0.94142	0.02	0.1729	0.007	1e-05	status=JK
YAL066W	YAL066W		1.01636	0.008	1.01997	0.038	-0.00511	0.008	2e-05	status=JK
YAL067C	SEO1		0.86989	0.179	1.10322	0.058	-0.21891	0.178	0.0023
YAL068C	PAU8		1.05694	0.086	1.01562	0.017	0.03785	0.086	0.00015
YAR002C-A	ERP1		1.07562	0.039	1.09159	0.038	-0.01859	0.039	1e-05
YAR002W	NUP60		1.06262	0.026	1.01599	0.064	0.02906	0.026	0.0002	status=JK
YAR003W	SWD1		0.60888	0.088	0.80035	0.044	-0.18305	0.088	0.00081
YAR014C	BUD14		0.45982	0.05	0.82977	0.089	-0.38496	0.05	0.00036
YAR015W	ADE1		0.88573	0.123	1.05885	0.009	-0.17887	0.122	0.00072
YAR018C	KIN3		0.71801	0.195	1.0047	0.097	-0.30139	0.195	0.00516
YAR020C	PAU7		0.86165	0.065	0.8787	0.091	-0.0161	0.065	0.0019	status=JK
YAR023C	YAR023C		0.98774	0.015	1.04747	0.091	-0.05876	0.015	8e-05	status=JK
YAR027W	UIP3		0.89727	0.186	0.97364	0.094	-0.09143	0.186	0.00238
YAR028W	YAR028W		0.95462	0.048	0.97571	0.049	-0.02783	0.048	3e-05
YAR029W	YAR029W		1.01118	0.008	1.0257	0.051	-0.02748	0.008	2e-05	status=JK
YAR030C	YAR030C		0.94324	0.023	1.00905	0.068	-0.07337	0.023	0
YAR031W	PRM9		0.9821	0.072	0.95647	0.034	0.02348	0.072	0.00011
YAR035W	YAT1		1.07576	0.044	1.0916	0.127	-0.04181	0.044	0.00055	status=JK
YAR037W	YAR037W		0.97256	0.132	1.02835	0.086	-0.03506	0.132	0.00068
YAR040C	YAR040C		1.06061	0.091	0.98644	0.114	0.09087	0.091	0.00017
YAR042W	SWH1		1.05321	0.217	1.09403	0.012	-0.04783	0.217	0.00233
YAR043C	YAR043C		1.08636	0.202	0.9923	0.076	0.09419	0.202	0.00173
YAR044W	YAR044W		1.14689	0.094	1.0822	0.053	0.06364	0.094	0.00015
YAR047C	YAR047C		1.0119	0.068	0.87963	0.112	0.13142	0.068	8e-05
YAR050W	FLO1		1.10316	0.011	0.99294	0.086	0.09408	0.011	4e-05	status=JK
YBL001C	ECM15		1.07325	0.063	1.03086	0.082	0.04952	0.063	5e-05
YBL003C	HTA2		1.08741	0.064	0.95972	0.193	0.09178	0.064	6e-05
YBL005W	PDR3		1.04731	0.047	0.95605	0.09	0.0707	0.047	2e-05
YBL007C	SLA1		0.4402	0.02	0.85231	0.114	-0.4391	0.02	3e-05
YBL008W	HIR1		1.14735	0.048	1.05068	0.297	0.06014	0.048	2e-05
YBL009W	ALK2		0.90219	0.032	1.00082	0.069	-0.09472	0.031	0.00041	status=JK
YBL010C	YBL010C		0.81151	0.181	1.02016	0.072	-0.19577	0.181	0.00292
YBL011W	SCT1		0.88397	0.129	0.73769	0.191	0.1876	0.128	0.00083
YBL013W	FMT1		0.87862	0.051	0.77554	0.089	0.09437	0.051	0.00114	status=JK
YBL015W	ACH1		1.2122	0.186	1.10277	0.178	0.14782	0.186	0.00098
YBL016W	FUS3		0.60922	0.063	0.98925	0.099	-0.37996	0.063	0.00354	status=JK
YBL017C	PEP1		0.98222	0.09	1.01959	0.016	-0.04383	0.09	0.00021
YBL019W	APN2		0.95913	0.107	1.04256	0.031	-0.09067	0.107	0.00038
YBL021C	HAP3		0.9744	0.041	0.88984	0.129	0.12566	0.041	0.00059	status=JK
YBL024W	NCL1		1.12948	0.022	1.0205	0.022	0.11042	0.022	0
YBL025W	RRN10		0.30265	0.016	0.16228	0.006	0.13831	0.016	4e-05
YBL027W	RPL19B		0.56215	0.289	0.76608	0.551	-0.22639	0.289	0.03014
YBL028C	YBL028C		1.09545	0.061	0.97452	0.023	0.1287	0.061	5e-05
YBL029W	YBL029W		1.15861	0.116	1.01958	0.02	0.13829	0.116	0.00027
YBL031W	SHE1		0.41851	0.251	0.49279	0.09	-0.06962	0.25	0.0444
YBL032W	HEK2		0.9706	0.118	0.95165	0.065	0.03133	0.118	0.00049
YBL036C	YBL036C		1.0524	0.014	0.97533	0.066	0.08796	0.014	6e-05	status=JK
YBL037W	APL3		1.05832	0.07	0.99315	0.025	0.05965	0.07	8e-05
YBL039C	URA7		0.93689	0.06	0.95863	0.073	-0.04018	0.059	7e-05
YBL042C	FUI1		0.99503	0.059	1.03668	0.009	-0.04536	0.059	6e-05
YBL043W	ECM13		1.02314	0.009	0.99811	0.062	0.01668	0.009	0
YBL046W	PSY4		1.07887	0.015	1.10578	0.05	-0.01877	0.015	7e-05	status=JK
YBL047C	EDE1		0.90112	0.015	1.03795	0.038	-0.14208	0.015	0
YBL048W	YBL048W		0.97468	0.149	0.99524	0.048	-0.01361	0.149	0.00096
YBL049W	MOH1		0.90825	0.017	0.96287	0.075	-0.04906	0.017	0.00012	status=JK
YBL051C	PIN4		0.94611	0.084	1.03161	0.015	-0.08563	0.084	0.00019
YBL052C	SAS3		0.88438	0.075	0.89809	0.046	-0.00137	0.075	0.00017
YBL053W	YBL053W		0.90841	0.063	1.01215	0.095	-0.09161	0.063	9e-05
YBL054W	TOD6		1.01888	0.018	0.96879	0.058	0.03769	0.018	0
YBL055C	YBL055C		0.95869	0.031	0.89026	0.106	0.03382	0.031	1e-05
YBL056W	PTC3		1.03921	0.004	1.0383	0.009	-0.00282	0.004	0	status=JK
YBL057C	PTH2		1.06991	0.058	1.07068	0.034	0.00302	0.058	4e-05
YBL059W	YBL059W		0.85674	0.075	0.86289	0.081	-0.03041	0.075	0.00018
YBL060W	YEL1		1.05858	0.111	0.89224	0.121	0.14943	0.111	0.00032
YBL061C	SKT5		0.97111	0.123	0.9968	0.041	-0.01986	0.122	0.00055
YBL062W	YBL062W		0.96892	0.107	1.008	0.02	-0.03672	0.107	0.00036
YBL063W	KIP1		0.92789	0.177	1.0664	0.074	-0.13849	0.177	0.00184
YBL064C	PRX1		0.95462	0.1	0.99858	0.061	-0.06043	0.1	0.00031
YBL065W	YBL065W		1.01376	0.028	1.01469	0.106	-0.02761	0.028	0.00026	status=JK
YBL066C	SEF1		0.81683	0.048	1.03064	0.112	-0.18647	0.048	0.00113	status=JK
YBL067C	UBP13		0.92938	0.002	0.96714	0.06	-0.02962	0.002	0	status=JK
YBL068W	PRS4		1.063	0.037	1.05776	0.098	0.00535	0.037	1e-05
YBL069W	AST1		1.06003	0.033	1.03553	0.104	0.03907	0.033	1e-05
YBL070C	YBL070C		1.01109	0.065	0.98961	0.079	0.03997	0.065	7e-05
YBL071C	YBL071C		0.93684	0.149	0.94865	0.076	0.01706	0.149	0.00109
YBL072C	RPS8A		0.26335	0.08	0.34853	0.072	-0.09047	0.08	0.00712
YBL075C	SSA3		0.98315	0.142	1.0077	0.082	-0.04482	0.142	0.00082
YBL078C	ATG8		0.62837	0.102	0.76321	0.111	-0.14468	0.102	0.00117
YBL079W	NUP170		0.34875	0.031	0.41518	0.039	-0.06634	0.031	0.00019
YBL081W	YBL081W		1.01961	0.094	1.01969	0.062	-0.00331	0.094	0.00022
YBL082C	ALG3		1.01626	0.037	1.05857	0.068	-0.03306	0.037	1e-05
YBL083C	YBL083C		1.07519	0.07	1.17728	0.009	-0.09947	0.07	7e-05
YBL085W	BOI1		1.07565	0.034	0.96104	0.022	0.11745	0.034	1e-05
YBL086C	YBL086C		1.015	0.043	1.015	0.057	-0.00359	0.043	2e-05
YBL087C	RPL23A		0.69531	0.165	0.95516	0.075	-0.27412	0.165	0.00349
YBL088C	TEL1		1.15083	0.071	1.04198	0.044	0.10529	0.071	6e-05
YBL089W	AVT5		0.96441	0.12	0.90433	0.015	0.06123	0.12	0.00052
YBL091C	MAP2		1.08241	0.13	0.99817	0.011	0.07803	0.13	0.00047
YBL091C-A	SCS22		1.04566	0.162	1.02608	0.012	0.01561	0.162	0.001
YBL094C	YBL094C		0.87556	0.085	0.72511	0.25	0.11294	0.085	0.00311	status=JK
YBL095W	YBL095W		0.99424	0.093	0.87426	0.069	0.12137	0.093	0.00022
YBL096C	YBL096C		0.97989	0.127	1.03744	0.121	-0.04852	0.126	0.00058
YBL098W	BNA4		1.03385	0.053	1.01008	0.017	0.01964	0.053	4e-05
YBL100C	YBL100C		0.99425	0.067	1.06427	0.049	-0.06525	0.067	8e-05
YBL101C	ECM21		0.95683	0.11	0.9723	0.004	-0.01778	0.11	0.00041
YBL102W	SFT2		0.96365	0.065	0.96719	0.012	-0.00722	0.064	8e-05
YBL103C	RTG3		0.17745	0.024	0.25192	0.018	-0.07629	0.024	0.00067
YBL103C	RTG3		1.03124	0.037	1.05231	0.01	-0.02267	0.037	1e-05
YBL104C	SEA4		0.94491	0.136	0.99394	0.102	-0.04764	0.136	0.00081
YBL106C	SRO77		1.07279	0.185	1.01714	0.059	0.04975	0.185	0.00138
YBL107C	MIC23		0.96833	0.07	0.99557	0.087	-0.01933	0.07	0.0001
YBR001C	NTH2		0.85223	0.026	0.94271	0.034	-0.08787	0.026	0.00032	status=JK
YBR005W	RCR1		1.08373	0.075	1.0858	0.054	-0.00802	0.075	9e-05
YBR006W	UGA2		1.10126	0.068	1.16544	0.063	-0.02916	0.068	6e-05
YBR007C	DSF2		1.0259	0.099	1.1164	0.053	-0.08532	0.099	0.00025
YBR008C	FLR1		1.03443	0.057	1.09192	0.058	-0.04801	0.056	0.00099	status=JK
YBR009C	HHF1		0.84954	0.155	0.98986	0.173	-0.18543	0.155	0.00163
YBR010W	HHT1		0.83223	0.146	1.04901	0.049	-0.20169	0.146	0.00146
YBR012C	YBR012C		0.80369	0.221	0.98571	0.153	-0.15291	0.221	0.0054
YBR013C	YBR013C		0.92107	0.149	0.86652	0.197	0.02782	0.149	0.00113
YBR014C	GRX7		0.89563	0.09	0.96985	0.043	-0.05514	0.09	0.00028
YBR015C	MNN2		0.83226	0.07	0.93528	0.098	-0.11948	0.07	0.00017
YBR016W	YBR016W		0.83648	0.098	0.83522	0.132	0.00795	0.098	0.00044
YBR018C	GAL7		0.92391	0.061	1.02563	0.026	-0.11672	0.06	8e-05
YBR019C	GAL10		1.00317	0.04	0.96247	0.14	0.03959	0.04	0.00054	status=JK
YBR020W	GAL1		0.99391	0.079	1.01346	0.059	-0.01585	0.079	0.00014
YBR020W	GAL1		1.04032	0.041	1.0396	0.072	-0.00131	0.041	2e-05
YBR022W	POA1		0.92207	0.024	1.00013	0.066	-0.07658	0.024	0.00022	status=JK
YBR023C	CHS3		1.02851	0.039	1.01316	0.012	0.01082	0.039	2e-05
YBR024W	SCO2		1.01675	0.075	0.94347	0.107	0.05447	0.075	0.00011
YBR025C	OLA1		1.0643	0.066	1.01768	0.065	0.03234	0.066	0.00128	status=JK
YBR026C	ETR1		0.52776	0.025	0.79744	0.005	-0.2695	0.024	0.00072	status=JK
YBR027C	YBR027C		1.10356	0.107	1.10327	0.041	0.00384	0.107	0.00025
YBR028C	YPK3		1.10229	0.045	1.02032	0.137	0.04836	0.045	0.00055	status=JK
YBR030W	RKM3		1.11561	0.058	1.21165	0.075	-0.1017	0.058	0.0009	status=JK
YBR031W	RPL4A		1.02968	0.137	1.00892	0.05	-0.00483	0.137	0.00064
YBR032W	YBR032W		1.05355	0.016	0.97548	0.061	0.0736	0.016	7e-05	status=JK
YBR033W	EDS1		1.01923	0.02	1.00621	0.03	0.01427	0.02	0
YBR034C	HMT1		1.01031	0.053	1.08	0.085	-0.09133	0.052	4e-05
YBR036C	CSG2		0.37281	0.027	0.17518	0.006	0.19782	0.027	0.00175	status=JK
YBR040W	FIG1		1.08217	0.05	1.07612	0.036	0.00575	0.05	3e-05
YBR041W	FAT1		0.9276	0.093	0.98568	0.093	-0.03777	0.093	0.00028
YBR042C	CST26		0.99913	0.054	0.99396	0.01	0.00275	0.054	4e-05
YBR043C	QDR3		1.03193	0.019	1.03226	0.001	-0.0014	0.019	0.00012	status=JK
YBR044C	TCM62		0.95923	0.102	0.98682	0.054	-0.02163	0.102	0.00033
YBR045C	GIP1		1.00799	0.028	0.98561	0.026	0.01723	0.028	0.00025	status=JK
YBR046C	ZTA1		0.8978	0.132	1.08303	0.018	-0.17931	0.132	0.00086
YBR047W	FMP23		0.99617	0.111	1.03094	0.047	-0.03317	0.111	0.00038
YBR048W	RPS11B		0.65519	0.026	0.83676	0.032	-0.18573	0.026	0.00051	status=JK
YBR050C	REG2		1.02	0.036	1.03883	0.021	-0.02203	0.036	1e-05
YBR051W	YBR051W		1.07985	0.065	1.09018	0.096	0.01046	0.065	6e-05
YBR052C	RFS1		0.97124	0.045	1.01084	0.079	-0.04049	0.045	3e-05
YBR053C	YBR053C		1.00032	0.006	1.07706	0.068	-0.06341	0.006	1e-05	status=JK
YBR054W	YRO2		0.99741	0.05	0.9405	0.16	0.04791	0.05	4e-05
YBR056W	YBR056W		1.09384	0.05	1.08658	0.05	0.02209	0.05	0.0007	status=JK
YBR057C	MUM2		0.98024	0.048	1.02744	0.021	-0.04178	0.048	3e-05
YBR058C	UBP14		0.93235	0.13	0.84033	0.033	0.09543	0.13	0.00074
YBR059C	AKL1		0.9493	0.113	0.93548	0.045	0.0135	0.113	0.00046
YBR061C	TRM7		0.98985	0.074	1.04348	0.143	-0.09152	0.074	0.00011
YBR061C	TRM7		0.61	0.067	0.68189	0.069	-0.07406	0.067	0.00037
YBR062C	YBR062C		1.08057	0.018	0.97564	0.084	0.09508	0.018	0.0001	status=JK
YBR063C	YBR063C		1.05242	0.032	1.03807	0.027	0.01652	0.032	0.00031	status=JK
YBR064W	YBR064W		1.08304	0.018	1.06776	0.069	0.01796	0.018	9e-05	status=JK
YBR065C	ECM2		1.03278	0.04	1.10421	0.045	-0.06857	0.04	2e-05
YBR066C	NRG2		1.05827	0.053	0.97939	0.02	0.07906	0.053	3e-05
YBR067C	TIP1		1.18725	0.125	1.02907	0.165	0.16544	0.125	0.00032
YBR068C	BAP2		1.04224	0.073	1.03855	0.017	0.00687	0.073	9e-05
YBR069C	TAT1		1.03367	0.035	0.96534	0.013	0.07413	0.035	0.00037	status=JK
YBR071W	YBR071W		0.99397	0.016	0.99198	0.062	-0.00231	0.016	9e-05	status=JK
YBR072W	HSP26		1.06618	0.026	1.05478	0.097	0.01123	0.026	0
YBR073W	RDH54		0.9546	0.021	0.91198	0.031	0.03729	0.021	0.00016	status=JK
YBR074W	YBR074W		1.08901	0.028	1.00564	0.053	0.08247	0.028	0
YBR075W	YBR075W		1.06086	0.023	0.99125	0.051	0.06232	0.023	0
YBR075W	YBR075W		1.03314	0.012	1.02258	0.014	0.00909	0.012	0
YBR076W	ECM8		0.84567	0.124	0.89379	0.044	-0.04232	0.124	0.00085
YBR077C	SLM4		0.97165	0.106	1.05976	0.015	-0.08862	0.106	0.00035
YBR078W	ECM33		1.08324	0.01	1.12211	0.089	-0.03006	0.01	0
YBR082C	UBC4		0.86088	0.162	1.02195	0.085	-0.13829	0.162	0.00179
YBR082C	UBC4		0.98148	0.027	1.04998	0.077	-0.0667	0.027	1e-05
YBR083W	TEC1		1.30237	0.006	1.11283	0.135	0.23163	0.006	1e-05	status=JK
YBR084C-A	RPL19A		0.60223	0.192	0.95766	0.067	-0.32689	0.192	0.00816
YBR084W	MIS1		1.05781	0.084	0.99432	0.038	0.06225	0.084	0.00014
YBR085W	AAC3		0.99797	0.01	0.99416	0.071	-0.0121	0.01	0
YBR086C	IST2		1.0066	0.029	0.94045	0.052	0.06996	0.029	1e-05
YBR090C	YBR090C		0.8838	0.142	0.88647	0.131	0.03458	0.142	0.00112
YBR090C-A	YBR090C-A		0.96382	0.016	0.87018	0.116	0.08869	0.016	9e-05	status=JK
YBR092C	PHO3		1.00733	0.027	0.9772	0.046	0.02691	0.026	1e-05
YBR093C	PHO5		0.26332	0.021	0.49787	0.088	-0.24078	0.021	0.00204	status=JK
YBR094W	PBY1		0.99951	0.021	0.9857	0.023	0.01299	0.021	0
YBR095C	RXT2		0.46103	0.073	0.40267	0.087	0.03008	0.073	0.00107
YBR095C	RXT2		0.83238	0.123	0.51035	0.13	0.34072	0.123	0.00087
YBR098W	MMS4		1.01443	0.014	1.03964	0.083	-0.02219	0.014	7e-05	status=JK
YBR099C	YBR099C		1.03983	0.03	0.92822	0.174	0.0875	0.03	0.00027	status=JK
YBR100W	YBR100W		1.134	0.109	0.99169	0.055	0.15054	0.108	0.00024
YBR101C	FES1		1.04605	0.073	0.99688	0.009	0.05166	0.073	9e-05
YBR103W	SIF2		0.47264	0.054	0.6478	0.122	-0.15665	0.054	0.00438	status=JK
YBR104W	YMC2		0.9164	0.081	0.92665	0.035	-0.03078	0.081	0.00019
YBR105C	VID24		1.08435	0.025	1.05262	0.082	0.04448	0.025	0
YBR106W	PHO88		0.04613	0.051	0.03194	0.037	0.01513	0.051	0.16943
YBR107C	IML3		0.96143	0.052	0.96075	0.081	-0.00508	0.052	4e-05
YBR108W	AIM3		1.00949	0.078	0.83284	0.061	0.17107	0.078	0.00013
YBR111C	YSA1		0.96159	0.068	1.00562	0.063	-0.02936	0.067	0.0001
YBR113W	YBR113W		1.02922	0.034	1.03113	0.007	-0.00215	0.034	0.00036	status=JK
YBR114W	RAD16		1.03887	0.173	0.98134	0.088	0.06942	0.172	0.00123
YBR115C	LYS2		0.14632	0.008	0.07799	0.017	0.07213	0.008	4e-05
YBR115C	LYS2		0.46518	0.04	0.11658	0.02	0.34181	0.04	0.00017
YBR116C	YBR116C		1.04026	0.151	1.0126	0.113	0.01417	0.151	0.00083
YBR118W	TEF2		0.91449	0.037	0.71648	0.043	0.19852	0.037	2e-05
YBR119W	MUD1		0.85799	0.053	1.00167	0.123	-0.1635	0.053	7e-05
YBR121C	GRS1		1.01266	0.082	1.00092	0.034	0.00481	0.082	0.00015
YBR122C	MRPL36		0.95685	0.088	0.96008	0.123	-0.01173	0.088	0.00022
YBR125C	PTC4		1.05189	0.038	1.09971	0.026	-0.04427	0.038	0.00044	status=JK
YBR126C	TPS1		0.73237	0.045	0.95314	0.176	-0.177	0.045	6e-05
YBR128C	ATG14		0.94361	0.063	0.97501	0.065	-0.0435	0.063	8e-05
YBR129C	OPY1		0.88105	0.06	0.91254	0.051	-0.04167	0.06	9e-05
YBR130C	SHE3		1.00779	0.07	1.05384	0.081	-0.04593	0.07	9e-05
YBR131W	CCZ1		0.6383	0.134	0.62553	0.104	0.01686	0.134	0.00245
YBR132C	AGP2		1.11074	0.023	1.08649	0.05	0.01917	0.023	0
YBR134W	YBR134W		1.06535	0.021	0.97824	0.053	0.08813	0.021	0.00013	status=JK
YBR137W	YBR137W		0.92142	0.159	0.57696	0.142	0.37203	0.159	0.00137
YBR138C	YBR138C		1.24658	0.109	1.1822	0.039	0.05886	0.109	0.00018
YBR139W	YBR139W		1.05813	0.156	1.09306	0.058	-0.03966	0.156	0.00086
YBR141C	YBR141C		1.0309	0.065	1.06633	0.094	-0.05132	0.065	0.00133	status=JK
YBR144C	YBR144C		0.99351	0.048	0.93517	0.116	0.0413	0.048	3e-05
YBR145W	ADH5		0.87726	0.137	0.65205	0.021	0.22551	0.137	0.00102
YBR146W	MRPS9		0.99337	0.063	0.98688	0.065	0.02403	0.063	7e-05
YBR147W	RTC2		0.84783	0.103	1.04581	0.088	-0.22307	0.103	0.00049
YBR148W	YSW1		1.00626	0.085	1.03999	0.014	-0.03583	0.085	0.00017
YBR149W	ARA1		1.1273	0.058	1.00688	0.06	0.13535	0.058	4e-05
YBR150C	TBS1		1.05917	0.037	0.98351	0.014	0.08188	0.037	1e-05
YBR151W	APD1		0.85457	0.029	0.88681	0.011	-0.03087	0.029	0.00038	status=JK
YBR156C	SLI15		1.00698	0.027	0.95982	0.041	0.04198	0.027	1e-05
YBR157C	ICS2		1.02241	0.052	1.01953	0.032	-0.00414	0.052	4e-05
YBR158W	AMN1		1.06183	0.051	0.95665	0.078	0.10314	0.051	0.00077	status=JK
YBR159W	IFA38		1.03851	0.08	1.04646	0.045	-0.00947	0.08	0.00013
YBR161W	CSH1		1.06452	0.004	1.01269	0.011	0.05186	0.004	0	status=JK
YBR162C	TOS1		1.04335	0.027	1.05572	0.04	-0.02174	0.027	0
YBR162W-A	YSY6		1.03585	0.01	1.01311	0.023	0.02264	0.01	3e-05	status=JK
YBR164C	ARL1		1.0146	0.104	1.01374	0.038	-0.00683	0.104	0.0003
YBR165W	UBS1		0.90672	0.017	1.00668	0.036	-0.10107	0.017	0.00011	status=JK
YBR165W	UBS1		0.9949	0.032	1.0615	0.027	-0.0726	0.032	1e-05
YBR166C	TYR1		0.94001	0.03	0.97354	0.15	-0.04728	0.03	0.00035	status=JK
YBR168W	PEX32		1.0376	0.016	1.00788	0.137	0.05048	0.016	8e-05	status=JK
YBR169C	SSE2		0.97176	0.051	0.83545	0.02	0.14586	0.051	4e-05
YBR170C	NPL4		0.35346	0.162	0.28416	0.037	0.08323	0.162	0.02223
YBR171W	SEC66		0.93785	0.101	0.927	0.018	0.01544	0.101	0.00034
YBR172C	SMY2		0.86718	0.147	0.9043	0.074	-0.02639	0.147	0.0013
YBR174C	YBR174C		0.78738	0.101	1.03188	0.003	-0.24678	0.101	0.00057
YBR175W	SWD3		0.69716	0.139	0.93362	0.025	-0.24226	0.139	0.00213
YBR176W	ECM31		1.06457	0.055	0.92915	0.093	0.09493	0.055	0.00089	status=JK
YBR177C	EHT1		1.01383	0.041	0.96255	0.075	0.03395	0.041	0.00055	status=JK
YBR178W	YBR178W		1.05618	0.155	1.11304	0.07	-0.04326	0.155	0.00086
YBR180W	DTR1		0.73582	0.194	0.86355	0.038	-0.12872	0.193	0.00473
YBR181C	RPS6B		0.55416	0.004	0.53331	0.175	0.0052	0.004	0
YBR182C	SMP1		1.09917	0.137	1.03448	0.03	0.07843	0.137	0.00052
YBR183W	YPC1		0.88951	0.265	1.01811	0.09	-0.14708	0.265	0.00673
YBR184W	YBR184W		1.00928	0.039	1.04043	0.09	-0.01889	0.039	2e-05
YBR185C	MBA1		0.97347	0.067	0.85936	0.053	0.11632	0.067	9e-05
YBR186W	PCH2		1.05342	0.046	1.00268	0.073	0.04905	0.046	2e-05
YBR187W	GDT1		0.98316	0.015	1.03523	0.062	-0.05341	0.015	8e-05	status=JK
YBR188C	NTC20		1.08943	0.087	1.07714	0.081	0.02921	0.087	0.00014
YBR189W	RPS9B		0.25972	0.008	0.20197	0.014	0.05843	0.008	0.00028	status=JK
YBR194W	AIM4		0.78206	0.082	0.4385	0.014	0.34884	0.082	0.00032
YBR195C	MSI1		0.98982	0.125	1.0701	0.023	-0.08642	0.125	0.00055
YBR197C	YBR197C		1.04553	0.09	1.03471	0.022	0.0162	0.09	0.00018
YBR199W	KTR4		1.11131	0.054	1.11426	0.03	-0.0157	0.054	3e-05
YBR200W	BEM1		0.46712	0.225	0.74797	0.131	-0.31704	0.225	0.02533
YBR201W	DER1		0.91035	0.019	0.80809	0.039	0.10415	0.019	0.00015	status=JK
YBR203W	COS111		1.09958	0.006	1.06439	0.001	0.03369	0.006	1e-05	status=JK
YBR204C	LDH1		1.00307	0.051	1.08814	0.113	-0.07682	0.051	4e-05
YBR205W	KTR3		0.99497	0.037	1.05756	0.045	-0.06652	0.037	1e-05
YBR206W	YBR206W		1.04429	0.02	1.03008	0.088	0.02722	0.02	0
YBR207W	FTH1		1.08665	0.09	1.06584	0.109	0.02619	0.09	0.00016
YBR208C	DUR1		0.96702	0.226	1.07008	0.072	-0.09876	0.226	0.00337
YBR209W	YBR209W		1.21655	0.223	1.17896	0.136	0.02423	0.223	0.00165
YBR210W	ERV15		1.02082	0.065	1.0123	0.051	0.00019	0.065	7e-05
YBR212W	NGR1		0.99663	0.129	0.93868	0.069	0.07937	0.129	0.00059
YBR213W	MET8		1.12437	0.018	1.01421	0.005	0.10652	0.018	9e-05	status=JK
YBR214W	SDS24		1.068	0.023	1.01135	0.094	0.06715	0.023	0
YBR215W	HPC2		1.34821	0.076	1.28297	0.058	0.07656	0.076	5e-05
YBR216C	YBP1		0.95562	0.048	0.99467	0.076	-0.0424	0.048	3e-05
YBR217W	ATG12		1.04971	0.026	1.02879	0.071	0.01281	0.026	0.0002	status=JK
YBR218C	PYC2		1.08324	0.042	0.97123	0.089	0.1126	0.042	2e-05
YBR219C	YBR219C		0.81485	0.18	0.96879	0.036	-0.14581	0.18	0.00284
YBR220C	YBR220C		0.84291	0.036	0.98755	0.141	-0.17158	0.036	0.00062	status=JK
YBR221C	PDB1		0.783	0.039	0.7313	0.075	0.06671	0.039	3e-05
YBR222C	PCS60		1.16393	0.164	1.02542	0.079	0.14255	0.164	0.00076
YBR223C	TDP1		1.0173	0.003	1.04849	0.046	-0.03506	0.003	0	status=JK
YBR224W	YBR224W		0.97367	0.019	1.08953	0.025	-0.11893	0.019	0
YBR225W	YBR225W		0.90996	0.127	1.04011	0.077	-0.13532	0.127	0.00074
YBR226C	YBR226C		0.99491	0.078	0.95048	0.024	0.02976	0.078	0.00013
YBR227C	MCX1		1.03988	0.061	1.01964	0.07	0.02066	0.061	5e-05
YBR228W	SLX1		1.01886	0.028	1.05337	0.044	-0.03163	0.028	1e-05
YBR229C	ROT2		1.02106	0.004	1.06412	0.085	-0.06251	0.004	1e-05	status=JK
YBR230C	OM14		0.98819	0.048	1.02639	0.042	-0.03858	0.048	3e-05
YBR231C	SWC5		0.52749	0.101	0.53653	0.091	-0.01087	0.101	0.00187
YBR232C	YBR232C		0.98287	0.018	1.0213	0.069	-0.05525	0.017	0.00011	status=JK
YBR233W	PBP2		0.98133	0.038	0.97842	0.005	0.00367	0.038	2e-05
YBR235W	VHC1		0.93915	0.073	0.98712	0.044	-0.0455	0.073	0.00013
YBR238C	YBR238C		0.91876	0.023	0.82888	0.081	0.09043	0.023	0.0002	status=JK
YBR239C	ERT1		1.07745	0.065	1.01065	0.076	0.04996	0.065	6e-05
YBR240C	THI2		1.04465	0.039	1.06866	0.1	-0.0064	0.039	1e-05
YBR241C	YBR241C		0.98011	0.023	1.04695	0.072	-0.04985	0.023	0
YBR242W	YBR242W		1.00401	0.049	1.02271	0.017	-0.01543	0.049	3e-05
YBR244W	GPX2		0.98097	0.033	1.07813	0.061	-0.09816	0.033	1e-05
YBR245C	ISW1		1.12384	0.057	1.12791	0.079	-0.00278	0.057	4e-05
YBR246W	RRT2		0.99354	0.065	0.97789	0.024	0.00582	0.065	8e-05
YBR248C	HIS7		0.43383	0.097	0.21899	0.039	0.20537	0.097	0.00294
YBR249C	ARO4		0.90529	0.019	0.94668	0.023	-0.04908	0.019	0.00015	status=JK
YBR250W	SPO23		1.01804	0.004	1.04842	0.052	-0.04415	0.004	1e-05	status=JK
YBR255W	MTC4		1.05644	0.071	1.03693	0.059	0.00766	0.071	8e-05
YBR258C	SHG1		1.04453	0.089	1.06016	0.039	-0.00776	0.089	0.00017
YBR259W	YBR259W		0.93181	0.023	1.04922	0.014	-0.12126	0.023	0.00021	status=JK
YBR260C	RGD1		0.98191	0.014	1.05067	0.005	-0.07231	0.014	7e-05	status=JK
YBR261C	TAE1		0.99646	0.039	1.02	0.039	-0.03906	0.039	0.0005	status=JK
YBR262C	AIM5		0.9121	0.066	1.0159	0.088	-0.08975	0.066	0.0001
YBR263W	SHM1		0.94761	0.134	0.96841	0.025	-0.02571	0.134	0.00077
YBR264C	YPT10		0.99647	0.075	1.01711	0.06	-0.03276	0.075	0.00012
YBR266C	YBR266C		0.6039	0.139	0.67276	0.044	-0.05992	0.139	0.00319
YBR267W	REI1		0.5222	0.015	0.53333	0.11	-0.02441	0.015	0.00027	status=JK
YBR269C	FMP21		1.02679	0.048	0.96494	0.045	0.07213	0.048	3e-05
YBR270C	BIT2		0.98867	0.114	0.91816	0.197	0.03549	0.114	0.00042
YBR271W	EFM2		1.0097	0.048	1.00489	0.073	0.00824	0.048	3e-05
YBR272C	HSM3		0.98466	0.016	1.00634	0.06	-0.03128	0.016	9e-05	status=JK
YBR273C	UBX7		0.98186	0.056	1.09594	0.062	-0.11735	0.056	5e-05
YBR274W	CHK1		0.9696	0.045	0.99078	0.029	-0.02295	0.045	3e-05
YBR275C	RIF1		0.98796	0.045	0.93345	0.108	0.02745	0.045	0.00069	status=JK
YBR276C	PPS1		0.96557	0.074	0.93156	0.117	0.04566	0.074	0.00012
YBR277C	YBR277C		0.94476	0.064	0.9037	0.006	0.03707	0.064	9e-05
YBR278W	DPB3		1.01197	0.121	0.89524	0.03	0.10857	0.121	0.00047
YBR280C	SAF1		1.0348	0.055	1.04579	0.09	-0.02297	0.055	4e-05
YBR281C	DUG2		1.04783	0.014	0.97793	0.048	0.07592	0.014	6e-05	status=JK
YBR283C	SSH1		0.93842	0.144	0.85967	0.02	0.08376	0.144	0.00098
YBR284W	YBR284W		0.94446	0.027	0.89049	0.024	0.05678	0.027	0.00026	status=JK
YBR285W	YBR285W		1.02002	0.024	1.0109	0.046	-0.0035	0.024	0
YBR286W	APE3		1.01737	0.015	0.95166	0.009	0.06343	0.015	0
YBR287W	YBR287W		0.963	0.054	0.93834	0.071	0.01757	0.054	0.00105	status=JK
YBR288C	APM3		0.77125	0.105	0.89889	0.02	-0.12642	0.105	0.00069
YBR289W	SNF5		0.52883	0.118	0.49282	0.056	0.03355	0.118	0.00292
YBR290W	BSD2		1.03934	0.061	1.03426	0.079	0.02221	0.06	5e-05
YBR291C	CTP1		0.86548	0.024	0.95456	0.056	-0.09763	0.024	0.00026	status=JK
YBR292C	YBR292C		0.93238	0.08	0.95972	0.081	-0.02786	0.08	0.00017
YBR293W	VBA2		0.92928	0.001	0.90975	0.019	0.01461	0.001	0	status=JK
YBR294W	SUL1		0	0	0.02118	0.037	0	0	#NUM!
YBR295W	PCA1		0.93535	0.027	0.97517	0.027	-0.03517	0.027	1e-05
YBR296C	PHO89		0.98772	0.029	1.00338	0.023	-0.02042	0.029	1e-05
YBR297W	MAL33		1.00777	0.055	0.94276	0.031	0.06138	0.055	4e-05
YBR298C	MAL31		0.98136	0.031	0.98015	0.031	0.00103	0.031	0.00033	status=JK
YBR299W	MAL32		1.00684	0.002	0.9705	0.026	0.04431	0.002	0	status=JK
YBR300C	YBR300C		1.01189	0.01	1.01506	0.026	-0.00564	0.01	3e-05	status=JK
YBR301W	PAU24		1.04866	0.004	1.03364	0.083	0.01414	0.004	1e-05	status=JK
YCL001W	RER1		1.07817	0.045	1.05402	0.008	0.01831	0.045	0.00059	status=JK
YCL001W-A	YCL001W-A		1.01982	0.146	1.01363	0.089	0.02352	0.145	0.00079
YCL002C	YCL002C		1.03664	0.038	1.0753	0.166	-0.03066	0.038	0.00045	status=JK
YCL006C	YCL006C		0.98639	0.086	0.98882	0.087	-0.01846	0.086	0.00018
YCL009C	ILV6		1.01625	0.039	1.0685	0.074	-0.03498	0.039	2e-05
YCL010C	SGF29		0.86081	0.015	0.79719	0.015	0.05671	0.015	0.0001	status=JK
YCL011C	GBP2		1.03621	0.047	1.03733	0.068	-0.00114	0.047	0.00068	status=JK
YCL012W	YCL012W		1.02878	0.044	1.00665	0.054	0.03218	0.044	0.00061	status=JK
YCL013W	YCL013W		0.94086	0.016	0.82464	0.072	0.11471	0.016	0.0001	status=JK
YCL014W	BUD3		0.98175	0.007	0.93262	0.094	0.05746	0.007	2e-05	status=JK
YCL016C	DCC1		0.78944	0.129	0.8889	0.073	-0.10069	0.129	0.00117
YCL022C	YCL022C		1.09583	0.035	0.93136	0.229	0.10189	0.035	0.00034	status=JK
YCL023C	YCL023C		0.96754	0.206	0.97395	0.088	0.00195	0.206	0.00257
YCL024W	KCC4		1.01017	0.158	0.9652	0.027	0.04433	0.158	0.00103
YCL025C	AGP1		0.81032	0.076	0.99763	0.012	-0.19069	0.076	0.00022
YCL026C	YCL026C		0.99369	0.125	0.99303	0.054	0.01132	0.125	0.00054
YCL026C-A	FRM2		1.03824	0.027	1.02814	0.024	0.01889	0.027	0.00023	status=JK
YCL027W	FUS1		1.06784	0.064	0.95389	0.072	0.09743	0.064	6e-05
YCL028W	RNQ1		1.0116	0.106	1.05944	0.071	-0.04231	0.106	0.00032
YCL029C	BIK1		0.97984	0.02	0.90916	0.04	0.07042	0.02	0
YCL030C	HIS4		0.59482	0.027	0.28309	0.029	0.3167	0.027	0.00066	status=JK
YCL032W	STE50		0.80934	0.038	0.60138	0.047	0.21776	0.038	3e-05
YCL033C	MXR2		1.05251	0.146	1.03715	0.004	0.01654	0.146	0.00073
YCL034W	LSB5		1.06209	0.039	0.97363	0.038	0.08709	0.039	0.00044	status=JK
YCL035C	GRX1		1.07493	0.046	1.03618	0.003	0.0389	0.046	2e-05
YCL036W	GFD2		1.02387	0.05	0.9982	0.024	0.02218	0.05	3e-05
YCL037C	SRO9		0.91553	0.113	0.79236	0.119	0.12533	0.113	0.00051
YCL038C	ATG22		0.9839	0.014	1.03802	0.088	-0.04311	0.014	7e-05	status=JK
YCL039W	GID7		1.0391	0.029	1.02213	0.041	0.02458	0.029	1e-05
YCL040W	GLK1		1.03897	0.031	1.01562	0.031	0.02922	0.031	1e-05
YCL042W	YCL042W		1.04499	0.013	1.03093	0.029	0.01011	0.013	0
YCL044C	MGR1		0.98863	0.087	0.83998	0.052	0.16464	0.087	0.00019
YCL045C	EMC1		1.01959	0.081	1.05002	0.078	-0.02647	0.081	0.00014
YCL046W	YCL046W		1.02711	0.115	0.99498	0.009	0.03538	0.115	0.00038
YCL047C	POF1		0.98896	0.081	1.00284	0.054	-0.02495	0.081	0.00015
YCL048W	SPS22		0.97822	0.045	0.96431	0.058	0.00682	0.044	3e-05
YCL049C	YCL049C		0.98122	0.038	0.95879	0.059	0.01136	0.038	2e-05
YCL050C	APA1		1.02731	0.05	0.97884	0.052	0.04408	0.05	3e-05
YCL051W	LRE1		1.06885	0.047	1.00838	0.005	0.06067	0.047	2e-05
YCL055W	KAR4		0.90955	0.041	0.98572	0.025	-0.07978	0.04	2e-05
YCL056C	PEX34		1.05441	0.026	0.989	0.026	0.0672	0.026	0
YCL057W	PRD1		1.04285	0.012	1.0767	0.051	-0.03246	0.012	5e-05	status=JK
YCL060C	YCL060C		0.98172	0.047	0.91075	0.094	0.04149	0.047	3e-05
YCL061C	MRC1		0.97188	0.156	1.00355	0.1	-0.02072	0.155	0.00111
YCL062W	YCL062W		0.95286	0.022	0.98938	0.028	-0.03541	0.022	0.00017	status=JK
YCL063W	VAC17		1.00351	0.043	0.97077	0.029	0.02928	0.043	2e-05
YCL064C	CHA1		1.06019	0.082	1.06838	0.073	0.01487	0.082	0.00013
YCL069W	VBA3		0.92953	0.008	1.04466	0.099	-0.0923	0.008	3e-05	status=JK
YCL074W	YCL074W		0.8808	0.074	0.89684	0.16	0.03342	0.074	0.00016
YCL075W	YCL075W		1.03905	0.013	0.99953	0.032	0.02886	0.013	5e-05	status=JK
YCL076W	YCL076W		0.95061	0.029	0.97968	0.082	-0.02972	0.029	1e-05
YCR001W	YCR001W		1.09036	0.028	1.09486	0.023	-0.00616	0.028	0
YCR005C	CIT2		1.03963	0.034	1.04543	0.045	-0.00956	0.034	1e-05
YCR006C	YCR006C		1.02988	0.033	0.96567	0.024	0.06763	0.033	1e-05
YCR007C	YCR007C		1.12513	0.115	1.12036	0.008	0.0061	0.115	0.00029
YCR008W	SAT4		1.02813	0.122	1.04892	0.039	-0.01982	0.122	0.00046
YCR009C	RVS161		0.82275	0.027	0.9052	0.021	-0.08273	0.027	0.00037	status=JK
YCR010C	ADY2		1.02672	0.021	1.03194	0.081	-0.01397	0.021	0
YCR011C	ADP1		1.04519	0.005	1.06182	0.039	-0.01877	0.005	1e-05	status=JK
YCR014C	POL4		1.08725	0.068	1.17833	0.012	-0.08817	0.068	7e-05
YCR015C	YCR015C		0.99258	0.039	1.00889	0.017	-0.02558	0.039	2e-05
YCR016W	YCR016W		1.05676	0.076	1.0458	0.016	0.00172	0.076	0.0001
YCR017C	CWH43		1.00785	0.024	1.05574	0.022	-0.05129	0.024	0
YCR019W	MAK32		1.00582	0.035	0.95855	0.036	0.0417	0.035	1e-05
YCR020C	PET18		1.04175	0.007	1.10919	0.013	-0.07038	0.007	1e-05	status=JK
YCR020C-A	MAK31		1.03279	0.058	1.11264	0.036	-0.08316	0.058	5e-05
YCR021C	HSP30		1.124	0.012	1.08146	0.055	0.05462	0.012	4e-05	status=JK
YCR022C	YCR022C		1.13564	0.047	1.06094	0.071	0.05862	0.047	2e-05
YCR023C	YCR023C		1.06023	0.103	1.07415	0.004	-0.01356	0.103	0.00025
YCR024C-A	PMP1		1.06188	0.098	0.95922	0.019	0.10146	0.098	0.00021
YCR025C	YCR025C		1.08098	0.012	1.0335	0.041	0.04353	0.012	0
YCR026C	NPP1		1.04261	0.062	1.08693	0.06	-0.04141	0.062	6e-05
YCR027C	RHB1		1.04963	0.04	1.07334	0.104	-0.03334	0.04	2e-05
YCR028C-A	RIM1		0.90322	0.029	0.90956	0.074	-0.01491	0.029	1e-05
YCR030C	SYP1		1.02184	0.027	0.99203	0.056	0.0272	0.027	0
YCR031C	RPS14A		0.89786	0.039	0.98839	0.091	-0.07119	0.039	2e-05
YCR032W	BPH1		1.09988	0.024	0.94272	0.143	0.14389	0.024	0.00016	status=JK
YCR033W	SNT1		0.5262	0.135	0.62861	0.039	-0.09775	0.135	0.00441
YCR034W	FEN1		0.82223	0.109	0.90879	0.086	-0.09842	0.108	0.00062
YCR036W	RBK1		1.09506	0.063	1.0171	0.064	0.07949	0.063	5e-05
YCR037C	PHO87		1.06035	0.014	1.08908	0.046	-0.03647	0.014	6e-05	status=JK
YCR043C	YCR043C		1.15382	0.02	1.18104	0.025	-0.03954	0.02	0
YCR044C	PER1		0.97231	0.069	1.03249	0.046	-0.06999	0.069	0.0001
YCR045C	RRT12		1.12978	0.041	1.00423	0.055	0.13229	0.041	0.00043	status=JK
YCR048W	ARE1		1.11116	0.072	1.04126	0.013	0.06469	0.071	0.00138	status=JK
YCR049C	YCR049C		0.97687	0.013	1.03817	0.037	-0.05526	0.013	6e-05	status=JK
YCR050C	YCR050C		1.01327	0.11	1.03581	0.032	-0.03051	0.11	0.00035
YCR051W	YCR051W		1.07739	0.105	1.08697	0.042	-0.0213	0.105	0.00025
YCR053W	THR4		0.33924	0.052	0.24879	0.031	0.08087	0.052	0.00099
YCR059C	YIH1		0.92299	0.158	0.96074	0.06	-0.05359	0.158	0.00135
YCR060W	TAH1		0.81454	0.184	1.05736	0.11	-0.25853	0.183	0.00302
YCR061W	YCR061W		1.02966	0.151	0.9319	0.016	0.10123	0.15	0.00085
YCR062W	YCR062W		1.0237	0.012	0.98578	0.099	0.04057	0.012	5e-05	status=JK
YCR063W	BUD31		0.43686	0.019	0.56512	0.083	-0.1334	0.019	0.00061	status=JK
YCR065W	HCM1		1.01169	0.06	0.97581	0.029	0.03379	0.06	6e-05
YCR067C	SED4		1.10452	0.101	1.07782	0.029	0.01805	0.101	0.00021
YCR068W	ATG15		1.07445	0.052	0.9868	0.002	0.08573	0.052	3e-05
YCR069W	CPR4		1.10597	0.075	1.06727	0.005	0.03549	0.075	9e-05
YCR071C	IMG2		0.81453	0.02	0.63516	0.072	0.17958	0.02	0.0002	status=JK
YCR073C	SSK22		1.1278	0.03	1.0319	0.029	0.08674	0.03	0.00023	status=JK
YCR073W-A	SOL2		1.01571	0.015	1.03352	0.071	-0.02119	0.015	7e-05	status=JK
YCR075C	ERS1		1.06438	0.015	1.07617	0.102	-0.03526	0.015	0
YCR076C	FUB1		1.14257	0.058	1.15708	0.013	-0.02014	0.058	4e-05
YCR077C	PAT1		0.82901	0.096	1.01923	0.095	-0.17788	0.096	0.00043
YCR079W	PTC6		1.03892	0.022	1.19792	0.017	-0.15134	0.022	0
YCR081W	SRB8		0.88648	0.007	0.71552	0.043	0.17932	0.007	2e-05	status=JK
YCR082W	AHC2		1.02646	0.005	1.0363	0.069	-0.0158	0.005	1e-05	status=JK
YCR083W	TRX3		1.07859	0.041	1.0584	0.038	0.01992	0.041	2e-05
YCR085W	YCR085W		1.11732	0.012	1.05751	0.058	0.0398	0.012	0
YCR086W	CSM1		0.9056	0.089	0.99201	0.056	-0.09645	0.089	0.00026
YCR087C-A	YCR087C-A		1.05727	0.008	0.97643	0.044	0.07767	0.008	2e-05	status=JK
YCR087W	YCR087W		1.09811	0.096	0.99672	0.077	0.12362	0.096	0.00019
YCR088W	ABP1		0.99357	0.037	1.04409	0.081	-0.04331	0.037	1e-05
YCR089W	FIG2		1.04169	0.043	1.01609	0.034	0.02957	0.043	2e-05
YCR090C	YCR090C		1.05445	0.005	0.94549	0.067	0.12457	0.005	1e-05	status=JK
YCR091W	KIN82		1.04322	0.05	1.04992	0.01	-0.01145	0.05	3e-05
YCR092C	MSH3		1.04824	0.061	1.08013	0.067	-0.04213	0.061	5e-05
YCR095C	OCA4		1.02574	0.04	1.05047	0.074	-0.03498	0.039	2e-05
YCR098C	GIT1		1.04157	0.035	1.04652	0.049	-0.01493	0.035	1e-05
YCR099C	YCR099C		0.99085	0.009	0.98807	0.07	0.00326	0.009	2e-05	status=JK
YCR100C	YCR100C		1.04523	0.092	1.15829	0.124	-0.09967	0.092	0.00019
YCR101C	YCR101C		0.99832	0.048	1.0556	0.017	-0.05739	0.048	0.00078	status=JK
YCR102C	YCR102C		1.09112	0.009	1.04474	0.072	0.05363	0.009	2e-05	status=JK
YCR102W-A	YCR102W-A		1.04457	0.005	1.07902	0.053	-0.03632	0.005	1e-05	status=JK
YCR105W	ADH7		0.59707	0.469	0.85305	0.043	-0.25865	0.469	0.08442
YCR106W	RDS1		1.05531	0.042	0.9941	0.024	0.06086	0.042	2e-05
YCR107W	AAD3		1.07945	0.043	1.05468	0.017	0.01991	0.043	2e-05
YDL001W	RMD1		1.02912	0.045	0.94674	0.094	0.11284	0.045	0.00063	status=JK
YDL002C	NHP10		1.03439	0.056	0.95073	0.019	0.08101	0.056	4e-05
YDL006W	PTC1		0.97039	0.002	0.85873	0.005	0.10945	0.002	0	status=JK
YDL010W	GRX6		1.02955	0.053	1.16918	0.061	-0.12591	0.053	4e-05
YDL011C	YDL011C		1.08773	0.037	1.08699	0.054	-0.00514	0.037	0.00038	status=JK
YDL012C	YDL012C		1.01898	0.132	1.05385	0.129	-0.03219	0.132	0.0006
YDL013W	SLX5		0.69401	0.142	0.298	0.058	0.39096	0.142	0.00228
YDL018C	ERP3		0.95511	0.036	1.11646	0.013	-0.1668	0.036	1e-05
YDL019C	OSH2		1.02622	0.061	1.05237	0.01	-0.03182	0.061	6e-05
YDL020C	RPN4		0.87401	0.115	0.81506	0.033	0.0648	0.115	0.00062
YDL023C	YDL023C		1.01017	0.016	0.96377	0.01	0.04832	0.016	8e-05	status=JK
YDL024C	DIA3		1.01565	0.051	1.00997	0.024	0.00528	0.051	3e-05
YDL025C	RTK1		1.06181	0.044	1.04618	0.088	-0.00572	0.044	2e-05
YDL026W	YDL026W		1.04789	0.011	1.02434	0.006	0.02374	0.011	3e-05	status=JK
YDL027C	YDL027C		1.04276	0.037	0.99014	0.081	0.04853	0.037	0.00043	status=JK
YDL033C	SLM3		0.63036	0.011	0.67328	0.101	-0.03327	0.011	0.0001	status=JK
YDL034W	YDL034W		1.02813	0.181	1.0315	0.184	-0.0024	0.181	0.00147
YDL035C	GPR1		1.04421	0.034	1.10037	0.073	-0.06259	0.034	1e-05
YDL036C	PUS9		1.08181	0.061	1.0703	0.052	0.00197	0.061	0.00106	status=JK
YDL037C	BSC1		1.00426	0.055	1.01804	0.071	-0.03254	0.055	5e-05
YDL038C	YDL038C		1.04889	0.044	1.05943	0.052	-0.01365	0.044	0.00059	status=JK
YDL039C	PRM7		1.101	0.066	1.15047	0.097	-0.02658	0.066	6e-05
YDL040C	NAT1		1.01525	0.01	1.04614	0.032	-0.03007	0.01	3e-05	status=JK
YDL041W	YDL041W		0.0008	0	0	0	0.0008	0	0
YDL042C	SIR2		0	0	0	0	0	0	#NUM!
YDL046W	NPC2		0.94538	0.002	1.02528	0.08	-0.1015	0.002	0	status=JK
YDL048C	STP4		1.06529	0.02	1.04017	0.096	0.04147	0.02	0.00012	status=JK
YDL050C	YDL050C		0.97319	0.016	0.95004	0.026	0.01276	0.016	9e-05	status=JK
YDL051W	LHP1		0.99158	0.02	0.9573	0.037	0.02666	0.02	0
YDL052C	SLC1		0.98668	0.066	0.98597	0.092	0.01522	0.066	8e-05
YDL053C	PBP4		0.94401	0.122	0.99418	0.094	-0.05199	0.121	0.00058
YDL054C	MCH1		0.99254	0.005	0.98038	0.034	0.00578	0.005	0
YDL056W	MBP1		1.01635	0.014	1.12634	0.01	-0.11232	0.014	6e-05	status=JK
YDL059C	RAD59		1.04873	0.041	1.08931	0.043	-0.04033	0.041	2e-05
YDL061C	RPS29B		0.82563	0.043	0.65703	0.005	0.16564	0.043	4e-05
YDL062W	YDL062W		0.84578	0.158	0.95409	0.079	-0.10891	0.158	0.00175
YDL065C	PEX19		0.96014	0.064	0.95777	0.013	-0.0002	0.064	8e-05
YDL066W	IDP1		1.11878	0.018	1.07197	0.148	0.01756	0.018	9e-05	status=JK
YDL070W	BDF2		1.08498	0.037	1.01604	0.035	0.05979	0.037	0.00039	status=JK
YDL071C	YDL071C		0.9467	0.115	0.85998	0.174	0.04807	0.114	0.00048
YDL074C	BRE1		0.5717	0.054	0.42179	0.005	0.14841	0.054	0.00023
YDL074C	BRE1		0.62593	0.195	0.59068	0.124	0.01015	0.195	0.00769
YDL076C	RXT3		1.02062	0.043	0.95179	0.034	0.05608	0.043	0.00058	status=JK
YDL077C	VAM6		0.46486	0.04	0.77173	0.034	-0.28797	0.04	0.00018
YDL078C	MDH3		0.70267	0.169	0.68488	0.184	0.00991	0.169	0.00363
YDL079C	MRK1		0.97745	0.086	1.02639	0.085	-0.04572	0.086	0.00018
YDL080C	THI3		1.03148	0.065	1.01591	0.012	0.00855	0.065	7e-05
YDL081C	RPP1A		0.78339	0.057	0.75607	0.102	0.04146	0.057	0.00011
YDL082W	RPL13A		0.81849	0.061	0.87563	0.067	-0.05667	0.061	0.00011
YDL083C	RPS16B		0.77954	0.053	0.77516	0.015	0.01064	0.053	9e-05
YDL085W	NDE2		1.09092	0.058	1.09946	0.056	-0.00115	0.058	4e-05
YDL086W	YDL086W		1.09709	0.035	0.9775	0.014	0.12592	0.035	1e-05
YDL088C	ASM4		1.03341	0.032	0.99366	0.061	0.02858	0.032	1e-05
YDL089W	NUR1		0.95627	0.073	0.96885	0.04	-0.01357	0.073	0.00012
YDL090C	RAM1		0	0	0	0	0	0	#NUM!
YDL091C	UBX3		1.02551	0.121	1.02762	0.115	-0.03149	0.121	0.00044
YDL093W	PMT5		1.07956	0.004	1.01505	0.047	0.04753	0.004	0	status=JK
YDL094C	YDL094C		0.98739	0.067	0.97998	0.07	0.02149	0.067	9e-05
YDL095W	PMT1		0.98546	0.026	0.96998	0.05	0.01286	0.026	1e-05
YDL096C	YDL096C		0.97845	0.004	1.04628	0.074	-0.0765	0.004	1e-05	status=JK
YDL099W	BUG1		1.05647	0.009	1.04969	0.072	0.00283	0.009	0
YDL100C	GET3		0.98836	0.037	0.93438	0.02	0.05413	0.037	1e-05
YDL104C	QRI7		0.93204	0.012	0.89417	0.06	0.03049	0.012	0
YDL106C	PHO2		0.89765	0.05	1.07709	0.045	-0.16838	0.05	5e-05
YDL109C	YDL109C		0.94626	0.063	1.00538	0.05	-0.06518	0.063	8e-05
YDL110C	TMA17		0.98476	0.033	0.93011	0.042	0.0533	0.033	1e-05
YDL112W	TRM3		1.01764	0.052	0.87487	0.132	0.13592	0.052	0.00088	status=JK
YDL113C	ATG20		0.93506	0.136	0.87931	0.145	0.02839	0.136	0.00083
YDL114W	YDL114W		0.93112	0.028	1.01116	0	-0.08119	0.028	0.0003	status=JK
YDL117W	CYK3		0.84036	0.01	0.87524	0.067	-0.04751	0.01	5e-05	status=JK
YDL118W	YDL118W		0.93515	0.017	0.94538	0.057	-0.01384	0.017	0
YDL119C	YDL119C		0.94369	0.026	0.92817	0.021	0.01942	0.026	1e-05
YDL121C	YDL121C		0.89237	0.028	0.9206	0.078	-0.02511	0.028	0.00032	status=JK
YDL122W	UBP1		1.05713	0.012	0.98696	0.123	0.04253	0.012	0
YDL123W	SNA4		1.00341	0.095	1.07743	0.104	-0.08078	0.094	0.00023
YDL124W	YDL124W		1.00087	0.026	1.03089	0.052	-0.02734	0.026	0.00022	status=JK
YDL125C	HNT1		1.00454	0.104	1.0686	0.047	-0.06519	0.104	0.0003
YDL127W	PCL2		1.00443	0.063	1.00684	0.046	0.00964	0.063	7e-05
YDL128W	VCX1		0.96703	0.06	1.00008	0.029	-0.03929	0.06	6e-05
YDL129W	YDL129W		0.95914	0.061	0.93758	0.076	0.00676	0.061	7e-05
YDL130W	RPP1B		0.93882	0.017	1.01857	0.047	-0.08639	0.017	0
YDL130W-A	STF1		1.06609	0.041	1.09271	0.035	-0.01831	0.041	2e-05
YDL131W	LYS21		1.0174	0.079	0.97595	0.132	-0.00087	0.079	0.00199	status=JK
YDL133C-A	RPL41B		1.07912	0.075	0.98525	0.079	0.0827	0.075	9e-05
YDL133W	SRF1		1.00844	0.026	1.05096	0.061	-0.03592	0.026	0.00022	status=JK
YDL134C	PPH21		0.98259	0.154	1.06552	0.141	-0.07252	0.154	0.00104
YDL134C-A	YDL134C-A		1.02486	0.091	1.01785	0.022	0.01143	0.091	0.00019
YDL135C	RDI1		0.93717	0.014	1.00385	0.09	-0.07379	0.014	8e-05	status=JK
YDL136W	RPL35B		0.88503	0.041	0.76148	0.2	0.18046	0.041	3e-05
YDL137W	ARF2		1.04609	0.033	0.97549	0.12	0.04574	0.033	0.00033	status=JK
YDL138W	RGT2		1.03015	0.024	1.08986	0.059	-0.0468	0.024	0
YDL142C	CRD1		0.98185	0.011	0.83774	0.032	0.13748	0.011	0
YDL144C	YDL144C		1.00713	0.021	0.99367	0.045	0.00965	0.021	0
YDL146W	LDB17		0.97053	0.183	1.02096	0.058	-0.05742	0.183	0.0018
YDL149W	ATG9		0.8709	0.119	0.90807	0.011	-0.03589	0.119	0.00069
YDL154W	MSH5		1.05212	0.102	1.0553	0.034	0.01183	0.102	0.00025
YDL155W	CLB3		0.97388	0.025	0.99807	0.053	-0.03938	0.025	0.00022	status=JK
YDL156W	CMR1		0.96521	0.109	0.97949	0.042	-0.01759	0.109	0.00039
YDL157C	YDL157C		0.93805	0.062	0.92155	0.003	0.01431	0.062	0.00147	status=JK
YDL159W	STE7		0	0	0	0	0	0	#NUM!
YDL160C	DHH1		0.00038	0	0	0	0.00038	0	0.1817
YDL161W	ENT1		0.94767	0.085	0.97885	0.004	-0.03322	0.084	0.00019
YDL162C	YDL162C		1.05049	0.059	1.08588	0.02	-0.03262	0.059	5e-05
YDL167C	NRP1		0.98714	0.048	0.97314	0.034	0.02184	0.048	3e-05
YDL168W	SFA1		0.97903	0.032	1.03513	0.063	-0.05861	0.032	0.00035	status=JK
YDL169C	UGX2		0.99619	0.037	1.01032	0.007	-0.01876	0.037	0.00045	status=JK
YDL170W	UGA3		1.01934	0.036	1.03716	0.073	-0.0295	0.036	0.00042	status=JK
YDL171C	GLT1		1.19622	0.089	1.09255	0.022	0.0992	0.089	0.00011
YDL172C	YDL172C		0.81157	0.142	1.00033	0.027	-0.20071	0.142	0.00144
YDL173W	PAR32		0.94502	0.047	0.95681	0.019	-0.0194	0.047	0.00081	status=JK
YDL174C	DLD1		1.03608	0.036	1.06285	0.049	-0.03804	0.036	1e-05
YDL175C	AIR2		1.06972	0.016	0.90865	0.026	0.15743	0.016	7e-05	status=JK
YDL176W	YDL176W		1.0489	0.054	1.14758	0.131	-0.11924	0.054	4e-05
YDL177C	YDL177C		1.07251	0.069	1.08382	0.1	0.00996	0.069	7e-05
YDL178W	DLD2		1.0581	0.02	1.07058	0.092	0.00731	0.02	0.00012	status=JK
YDL179W	PCL9		1.12612	0.05	1.12459	0.006	-0.0028	0.05	2e-05
YDL180W	YDL180W		0.73453	0.057	0.85741	0.189	-0.1477	0.057	0.00197	status=JK
YDL181W	INH1		0.89498	0.079	1.03048	0.045	-0.13096	0.079	0.00019
YDL182W	LYS20		0.85883	0.069	0.9741	0.103	-0.10905	0.069	0.00014
YDL183C	YDL183C		0.96138	0.093	0.94047	0.091	0.02019	0.093	0.00025
YDL184C	RPL41A		1.06237	0.041	1.03367	0.059	0.03222	0.041	2e-05
YDL185W	VMA1		0.94976	0.009	1.00772	0.106	-0.02604	0.009	3e-05	status=JK
YDL186W	YDL186W		1.01159	0.08	1.00075	0.101	-0.00509	0.08	0.00014
YDL187C	YDL187C		0.9516	0.06	1.00229	0.066	-0.04221	0.06	7e-05
YDL188C	PPH22		1.02102	0.042	1.02067	0.065	0.00637	0.042	2e-05
YDL189W	RBS1		1.03326	0.034	0.97211	0.04	0.05937	0.034	1e-05
YDL190C	UFD2		1.04579	0.046	0.98911	0.057	0.05341	0.046	2e-05
YDL191W	RPL35A		0.92375	0.048	1.00538	0.007	-0.0809	0.048	4e-05
YDL192W	ARF1		0.63478	0.059	0.36857	0.023	0.27194	0.059	0.00022
YDL194W	SNF3		1.04075	0.01	0.93576	0.005	0.10432	0.01	3e-05	status=JK
YDL197C	ASF2		1.03754	0.024	0.98059	0.061	0.04842	0.024	0
YDL199C	YDL199C		1.03941	0.038	1.05378	0.053	-0.02353	0.038	1e-05
YDL200C	MGT1		0.96201	0.075	0.99306	0.047	-0.03105	0.075	0.00013
YDL201W	TRM8		1.02825	0.023	1.01036	0.036	0.01476	0.023	0
YDL203C	ACK1		0.97513	0.019	0.99329	0.022	-0.0108	0.019	0.00013	status=JK
YDL204W	RTN2		1.04297	0.019	0.99622	0.071	0.03405	0.019	0
YDL206W	YDL206W		1.07111	0.02	1.0504	0.004	0.0194	0.02	0.00011	status=JK
YDL210W	UGA4		1.01382	0.044	1.03871	0.029	-0.02408	0.044	2e-05
YDL211C	YDL211C		1.08137	0.061	1.02541	0.024	0.05231	0.061	5e-05
YDL213C	NOP6		0.9501	0.048	1.00564	0.036	-0.06451	0.048	4e-05
YDL214C	PRR2		0.99701	0.061	0.97499	0.03	0.00647	0.061	6e-05
YDL215C	GDH2		0.92895	0.033	0.9353	0.117	-0.04698	0.033	1e-05
YDL216C	RRI1		0.99741	0.004	0.98008	0.048	0.01398	0.004	1e-05	status=JK
YDL218W	YDL218W		0.99741	0.049	0.98093	0.041	0.02069	0.049	3e-05
YDL219W	DTD1		1.07508	0.025	1.07486	0.088	0.00097	0.025	0
YDL222C	FMP45		1.02465	0.031	1.0514	0.036	-0.02933	0.031	1e-05
YDL223C	HBT1		1.01083	0.013	1.04769	0.039	-0.04062	0.013	6e-05	status=JK
YDL224C	WHI4		1.0638	0.032	1.07663	0.064	-0.01731	0.032	0.0003	status=JK
YDL226C	GCS1		0.96757	0.027	0.99006	0.057	-0.01176	0.027	1e-05
YDL227C	HO		0.99249	0.042	0.99696	0.017	-0.00756	0.042	2e-05
YDL229W	SSB1		0.83854	0.047	0.81619	0.028	0.0111	0.047	5e-05
YDL230W	PTP1		0.99569	0.045	1.06451	0.021	-0.07058	0.045	3e-05
YDL231C	BRE4		1.05584	0.023	0.99023	0.026	0.06487	0.023	0
YDL232W	OST4		0.7804	0.04	0.8415	0.022	-0.06008	0.04	4e-05
YDL233W	MFG1		1.04857	0.072	1.07322	0.026	-0.02171	0.072	9e-05
YDL234C	GYP7		1.032	0.046	1.09993	0.053	-0.0525	0.046	2e-05
YDL236W	PHO13		0.99548	0.062	0.97006	0.17	0.04602	0.062	7e-05
YDL237W	AIM6		1.0523	0.024	1.03696	0.051	0.02904	0.024	0
YDL238C	GUD1		0.982	0.009	0.95079	0.02	0.02978	0.009	3e-05	status=JK
YDL239C	ADY3		0.9666	0.018	0.93754	0.049	0.02191	0.018	0.00011	status=JK
YDL240W	LRG1		0.76705	0.138	0.94862	0.051	-0.18088	0.137	0.00154
YDL241W	YDL241W		1.04737	0.059	1.04087	0.065	0.00977	0.059	5e-05
YDL242W	YDL242W		1.00941	0.038	1.02229	0.062	-0.01874	0.038	2e-05
YDL243C	AAD4		1.04806	0.049	1.02658	0.068	0.03105	0.049	3e-05
YDR001C	NTH1		0.91513	0.013	0.91213	0.005	0.00614	0.013	6e-05	status=JK
YDR003W	RCR2		0.96782	0.021	0.96384	0.072	0.01199	0.021	0.00016	status=JK
YDR004W	RAD57		0.9359	0.016	0.80912	0.029	0.11618	0.016	0.0001	status=JK
YDR005C	MAF1		1.05681	0.021	0.99165	0.024	0.06662	0.021	0
YDR006C	SOK1		0.89608	0.01	0.81808	0.064	0.09552	0.01	4e-05	status=JK
YDR007W	TRP1		1.02571	0.034	1.08003	0.037	-0.04422	0.034	1e-05
YDR008C	YDR008C		0.95438	0.011	0.9637	0.05	-0.00174	0.011	4e-05	status=JK
YDR009W	GAL3		1.01148	0.059	1.00003	0.119	0.00455	0.059	6e-05
YDR010C	YDR010C		1.05856	0.048	1.08482	0.099	-0.02576	0.047	2e-05
YDR011W	SNQ2		1.02984	0.022	1.06621	0.027	-0.0378	0.022	0
YDR014W	RAD61		0.9987	0.094	0.99449	0.071	0.0015	0.094	0.00023
YDR015C	YDR015C		1.00835	0.034	0.93867	0.076	0.0629	0.034	1e-05
YDR018C	YDR018C		1.03948	0.016	0.95877	0.066	0.08464	0.016	8e-05	status=JK
YDR019C	GCV1		0.96342	0.019	0.9762	0.045	-0.01995	0.019	0.00013	status=JK
YDR020C	DAS2		1.05608	0.01	1.09195	0.084	-0.03974	0.01	3e-05	status=JK
YDR022C	ATG31		1.08002	0.029	1.03941	0.055	0.04127	0.029	1e-05
YDR024W	YDR024W		0.86917	0.007	0.85491	0.155	0.01267	0.007	2e-05	status=JK
YDR025W	RPS11A		0.89664	0.118	0.69023	0.172	0.17442	0.118	0.00062
YDR026C	NSI1		1.05099	0.026	1.02702	0	0.02433	0.026	0
YDR029W	YDR029W		0.94054	0.005	0.95822	0.035	0.00224	0.004	1e-05	status=JK
YDR030C	RAD28		1.08092	0.079	1.10303	0.074	-0.00345	0.079	0.00011
YDR031W	MIC14		0.92651	0.085	0.98202	0.069	-0.05652	0.085	0.00021
YDR032C	PST2		1.04027	0.02	0.94928	0.014	0.08762	0.02	0
YDR033W	MRH1		0.99976	0.035	0.94426	0.141	0.0232	0.035	1e-05
YDR034C	LYS14		0.33138	0.005	0.22223	0.019	0.10822	0.005	7e-05	status=JK
YDR035W	ARO3		1.09328	0.028	1.02519	0.088	0.0733	0.028	0.00021	status=JK
YDR036C	EHD3		0.95308	0.016	0.98294	0.079	-0.024	0.016	9e-05	status=JK
YDR042C	YDR042C		1.02965	0.051	1.12112	0.009	-0.09574	0.051	3e-05
YDR043C	NRG1		1.04979	0.045	1.03198	0.035	0.00843	0.045	2e-05
YDR046C	BAP3		0.98146	0.022	0.98244	0.062	-0.00732	0.022	0
YDR048C	YDR048C		0.90023	0.097	1.08322	0.089	-0.16193	0.097	0.00034
YDR049W	VMS1		0.8182	0.127	0.93006	0.121	-0.12218	0.127	0.00101
YDR051C	DET1		1.06628	0.013	1.01348	0.126	0.0863	0.013	5e-05	status=JK
YDR055W	PST1		0.996	0.013	1.11179	0.074	-0.09587	0.013	6e-05	status=JK
YDR056C	YDR056C		1.06658	0.049	0.97047	0.063	0.09955	0.049	3e-05
YDR057W	YOS9		1.12364	0.009	1.19639	0.071	-0.06714	0.009	2e-05	status=JK
YDR058C	TGL2		1.04972	0.007	0.91751	0.017	0.14	0.007	0
YDR059C	UBC5		1.08535	0.044	1.21863	0.065	-0.13439	0.044	2e-05
YDR061W	YDR061W		0.94772	0.042	1.04155	0.069	-0.07853	0.042	2e-05
YDR063W	AIM7		0.95472	0.03	0.97952	0.051	-0.0361	0.03	1e-05
YDR066C	RTR2		1.01966	0.098	0.95256	0.149	0.03873	0.098	0.00024
YDR067C	OCA6		1.0466	0.013	1.10766	0.086	-0.06438	0.013	6e-05	status=JK
YDR068W	DOS2		0.93975	0.148	0.9507	0.231	-0.06348	0.148	0.00106
YDR070C	FMP16		0.91224	0.04	1.03537	0.095	-0.10868	0.04	0.00065	status=JK
YDR071C	PAA1		0.91591	0.015	0.7906	0.095	0.10176	0.015	9e-05	status=JK
YDR072C	IPT1		0.94247	0.03	0.94801	0.023	-0.00035	0.03	0.00034	status=JK
YDR073W	SNF11		1.06757	0.061	1.04251	0.096	0.01937	0.061	5e-05
YDR074W	TPS2		0.98239	0.033	1.1368	0.042	-0.15803	0.033	1e-05
YDR075W	PPH3		1.02259	0.035	0.87388	0.042	0.15609	0.035	0.0004	status=JK
YDR076W	RAD55		0.91907	0.053	0.84027	0.124	0.06997	0.053	5e-05
YDR077W	SED1		1.01103	0.013	1.00661	0.105	-0.0055	0.013	5e-05	status=JK
YDR080W	VPS41		0.83626	0.011	0.88778	0.09	-0.06003	0.011	0
YDR083W	RRP8		0.79383	0.002	0.47003	0.014	0.32621	0.002	0	status=JK
YDR084C	TVP23		1.08249	0.044	0.98074	0.012	0.1012	0.044	2e-05
YDR085C	AFR1		1.06645	0.079	1.00493	0.069	0.05138	0.079	0.00011
YDR089W	YDR089W		1.07576	0.034	1.1104	0.01	-0.03851	0.034	1e-05
YDR090C	YDR090C		1.00712	0.038	1.04622	0.044	-0.03513	0.038	1e-05
YDR092W	UBC13		0.9803	0.043	0.88183	0.133	0.08934	0.043	2e-05
YDR093W	DNF2		1.10719	0.03	1.07285	0.027	0.05008	0.03	1e-05
YDR094W	YDR094W		1.05997	0.04	1.04952	0.021	0.01348	0.04	2e-05
YDR095C	YDR095C		0.97046	0.04	1.05638	0.014	-0.0917	0.04	2e-05
YDR096W	GIS1		0.99295	0.016	1.08424	0.016	-0.09284	0.016	0
YDR097C	MSH6		1.00432	0.013	1.01611	0.031	-0.01746	0.013	6e-05	status=JK
YDR098C	GRX3		1.02312	0.078	1.04059	0.106	0.00071	0.078	0.00012
YDR099W	BMH2		0.94198	0.072	0.94429	0.017	-0.00938	0.072	0.00012
YDR100W	TVP15		0.98573	0.056	0.98963	0.06	-0.01616	0.056	5e-05
YDR101C	ARX1		0.90104	0.031	0.85157	0.051	0.06239	0.031	1e-05
YDR102C	YDR102C		1.02578	0.027	1.02989	0.048	-0.00355	0.027	1e-05
YDR103W	STE5		0	0	0	0	0	0	#NUM!
YDR104C	SPO71		0.97284	0.021	0.98685	0.05	-0.0107	0.021	0
YDR105C	TMS1		1.03611	0.012	1.04335	0.024	0.00034	0.012	4e-05	status=JK
YDR107C	TMN2		0.95462	0.03	0.95737	0.008	-0.00205	0.03	1e-05
YDR108W	TRS85		1.00279	0.028	0.92026	0.024	0.08699	0.028	1e-05
YDR109C	YDR109C		1.05987	0.05	1.05118	0.022	0.00262	0.05	3e-05
YDR110W	FOB1		1.00998	0.012	1.02023	0.102	-0.02417	0.012	5e-05	status=JK
YDR111C	ALT2		0.99299	0.069	1.00401	0.022	-0.00311	0.069	9e-05
YDR112W	YDR112W		0.98412	0.035	1.05335	0.083	-0.06584	0.035	1e-05
YDR116C	MRPL1		0.87161	0.08	0.59249	0.078	0.27681	0.08	0.00021
YDR117C	TMA64		1.02508	0.046	1.00991	0.025	0.00934	0.046	2e-05
YDR119W	VBA4		0.98749	0.055	0.99583	0.087	0.00478	0.055	5e-05
YDR120C	TRM1		0.98948	0.031	0.92482	0.18	0.04632	0.03	1e-05
YDR121W	DPB4		0.97334	0.011	0.98691	0.053	-0.00445	0.011	4e-05	status=JK
YDR122W	KIN1		1.09363	0.029	1.10149	0.08	-0.02221	0.029	0
YDR123C	INO2		0.92817	0.018	0.72701	0.061	0.20618	0.018	0
YDR124W	YDR124W		1.03176	0.056	1.03653	0.102	0.00391	0.056	4e-05
YDR125C	ECM18		0.99561	0.097	1.04844	0.012	-0.05117	0.097	0.00025
YDR126W	SWF1		0.85427	0.087	0.75409	0.073	0.10881	0.087	0.00029
YDR127W	ARO1		0.60126	0.066	0.38062	0.006	0.22406	0.066	0.00035
YDR128W	MTC5		0.9901	0.024	1.03602	0.076	-0.05378	0.024	0
YDR130C	FIN1		1.00978	0.019	0.99452	0.015	0.01821	0.019	0.00012	status=JK
YDR131C	YDR131C		0.98069	0.035	1.02424	0.192	-0.09456	0.035	1e-05
YDR132C	YDR132C		1.0116	0.034	0.94886	0.072	0.05232	0.034	1e-05
YDR133C	YDR133C		1.06736	0.07	1.07231	0.096	0.00802	0.07	8e-05
YDR134C	YDR134C		1.01201	0.011	1.07672	0.011	-0.05778	0.011	4e-05	status=JK
YDR135C	YCF1		1.01391	0.036	1.0583	0.008	-0.04684	0.036	1e-05
YDR139C	RUB1		1.02137	0.042	1.05145	0.014	-0.029	0.042	2e-05
YDR142C	PEX7		1.01984	0.059	1.06074	0.007	-0.04303	0.059	5e-05
YDR143C	SAN1		1.11135	0.023	1.21139	0.081	-0.08954	0.023	0
YDR144C	MKC7		0.92947	0.096	0.80271	0.08	0.11806	0.095	0.0003
YDR146C	SWI5		0.90973	0.009	0.94458	0.084	-0.01382	0.009	3e-05	status=JK
YDR147W	EKI1		0.98738	0.035	0.92109	0.101	0.05457	0.035	1e-05
YDR148C	KGD2		0.99607	0.039	1.0406	0.019	-0.05147	0.039	2e-05
YDR149C	YDR149C		0.94248	0.008	0.96124	0.081	-0.01299	0.008	0
YDR150W	NUM1		0.93092	0.043	0.91929	0.054	0.01477	0.043	3e-05
YDR151C	CTH1		1.07152	0.039	1.06689	0.08	-0.0024	0.039	1e-05
YDR152W	GIR2		1.0357	0.026	1.04993	0.055	-0.00799	0.026	0
YDR153C	ENT5		1.08245	0.032	1.00992	0.076	0.07698	0.032	1e-05
YDR154C	YDR154C		0.88593	0.163	0.91538	0.16	-0.06216	0.163	0.00167
YDR155C	CPR1		1.08941	0.171	0.96889	0.243	0.06669	0.171	0.00105
YDR156W	RPA14		0.92207	0.013	0.88358	0.129	0.0566	0.013	7e-05	status=JK
YDR157W	YDR157W		0.9548	0.049	1.13278	0.014	-0.1763	0.049	4e-05
YDR158W	HOM2		0.68476	0.039	0.74961	0.063	-0.04527	0.039	0.00106	status=JK
YDR159W	SAC3		0.62874	0.02	0.35672	0.033	0.2799	0.02	0.00033	status=JK
YDR161W	YDR161W		1.06441	0.089	1.0134	0.104	0.04436	0.089	0.00016
YDR162C	NBP2		0.99015	0.064	0.93151	0.146	0.03952	0.064	8e-05
YDR163W	CWC15		1.04028	0.034	1.03054	0.14	0.02018	0.034	1e-05
YDR165W	TRM82		1.00213	0.039	1.04129	0.1	-0.03557	0.039	2e-05
YDR169C	STB3		0.80404	0.123	1.04769	0.1	-0.23565	0.123	0.00096
YDR171W	HSP42		1.09164	0.032	0.84532	0.087	0.23503	0.032	0.00029	status=JK
YDR173C	ARG82		0.31994	0.023	0.14911	0.006	0.17341	0.023	0.0001
YDR174W	HMO1		0.41348	0.032	0.4151	0.046	0.00036	0.032	0.00013
YDR178W	SDH4		0.91023	0.15	1.0731	0.19	-0.09985	0.15	0.00121
YDR179C	CSN9		1.02243	0.083	1.00151	0.215	0.02758	0.083	0.00015
YDR179W-A	YDR179W-A		0.87051	0.121	0.95033	0.16	-0.11034	0.121	0.00073
YDR181C	SAS4		0.96963	0.113	0.96117	0.223	-0.01719	0.113	0.00044
YDR183W	PLP1		0.95601	0.027	0.95028	0.055	-0.00314	0.027	1e-05
YDR184C	ATC1		0.939	0.011	0.97377	0.027	-0.04174	0.011	5e-05	status=JK
YDR185C	UPS3		1.00266	0.01	0.97285	0.006	0.03163	0.01	0
YDR186C	YDR186C		0.983	0.024	0.99103	0.025	-0.01416	0.024	0
YDR191W	HST4		1.13699	0.049	0.99726	0.104	0.15321	0.049	2e-05
YDR192C	NUP42		1.05282	0.037	1.07382	0.028	-0.01884	0.037	1e-05
YDR193W	YDR193W		1.07941	0	1.0271	0.039	0.07515	0	0	status=JK
YDR198C	RKM2		1.06751	0.074	1.10204	0.046	-0.03639	0.074	9e-05
YDR199W	YDR199W		1.03002	0.032	1.19499	0.011	-0.16996	0.032	1e-05
YDR202C	RAV2		0.89694	0.012	0.92363	0.171	-0.05531	0.012	6e-05	status=JK
YDR203W	YDR203W		0.99188	0.013	0.99732	0.099	-0.00105	0.013	6e-05	status=JK
YDR205W	MSC2		1.03386	0.027	0.97375	0.05	0.07486	0.027	1e-05
YDR206W	EBS1		0.9626	0.036	0.98354	0.036	-0.02767	0.036	1e-05
YDR207C	UME6		0.67618	0.017	0.29527	0.019	0.37599	0.017	0
YDR209C	YDR209C		1.02022	0.002	1.06719	0.019	-0.04612	0.002	0	status=JK
YDR210W	YDR210W		1.02914	0.012	0.98835	0.015	0.03836	0.012	5e-05	status=JK
YDR213W	UPC2		1.02748	0.037	0.998	0.005	0.02792	0.037	1e-05
YDR214W	AHA1		1.02135	0.062	1.05429	0.083	-0.0162	0.062	6e-05
YDR215C	YDR215C		0.98665	0.032	1.00264	0.024	-0.01097	0.032	1e-05
YDR216W	ADR1		1.02098	0.027	1.04137	0.009	-0.02327	0.027	0
YDR217C	RAD9		1.0328	0.07	0.94992	0.013	0.0783	0.07	9e-05
YDR218C	SPR28		0.98526	0.054	0.96679	0.133	0.00778	0.054	5e-05
YDR219C	MFB1		0.96514	0.03	0.88257	0.065	0.07541	0.029	1e-05
YDR220C	YDR220C		0.99033	0.026	0.98876	0.011	0.0014	0.026	1e-05
YDR221W	GTB1		1.02012	0.011	1.04374	0.017	-0.01986	0.011	4e-05	status=JK
YDR222W	YDR222W		0.99516	0.043	1.01089	0.064	-0.0307	0.043	2e-05
YDR223W	CRF1		1.05535	0.119	0.96877	0.017	0.09593	0.119	0.00039
YDR225W	HTA1		1.0576	0.041	1.09269	0.13	-0.02655	0.041	2e-05
YDR227W	SIR4		0	0	0	0	0	0	#NUM!
YDR229W	IVY1		0.98472	0.06	1.01594	0.035	-0.02499	0.06	6e-05
YDR233C	RTN1		0.98841	0.015	0.96005	0.038	0.02645	0.015	8e-05	status=JK
YDR234W	LYS4		0.51342	0.046	0.16248	0.017	0.34129	0.046	0.0002
YDR239C	YDR239C		1.0447	0.014	1.02782	0.086	0.0296	0.014	6e-05	status=JK
YDR241W	YDR241W		0.95423	0.025	0.75956	0.117	0.20015	0.024	0.00022	status=JK
YDR242W	AMD2		1.05106	0.037	1.08789	0.089	-0.03133	0.037	1e-05
YDR244W	PEX5		1.0426	0.033	1.0512	0.036	-0.01604	0.032	0.00032	status=JK
YDR245W	MNN10		0.7684	0.007	0.59027	0.007	0.18198	0.007	3e-05	status=JK
YDR247W	VHS1		0.94376	0.046	0.9772	0.075	-0.03263	0.046	3e-05
YDR248C	YDR248C		0.94471	0.049	0.99311	0.032	-0.04018	0.049	4e-05
YDR249C	YDR249C		1.06094	0.015	0.95275	0.281	0.0347	0.015	6e-05	status=JK
YDR250C	YDR250C		1.01643	0.062	1.04074	0.069	-0.00364	0.061	6e-05
YDR251W	PAM1		1.016	0.019	0.99687	0.074	0.00845	0.019	0
YDR252W	BTT1		1.05081	0.026	1.01463	0.03	0.04036	0.026	0
YDR253C	MET32		1.05937	0.012	1.03621	0.055	0.01511	0.012	4e-05	status=JK
YDR254W	CHL4		0.99115	0.019	1.03124	0.021	-0.03131	0.019	0
YDR255C	RMD5		1.09828	0.018	1.11201	0.082	0.00582	0.018	9e-05	status=JK
YDR256C	CTA1		0.99515	0.007	1.10723	0.012	-0.11686	0.007	2e-05	status=JK
YDR257C	RKM4		0.98761	0.034	0.92314	0.031	0.07044	0.034	1e-05
YDR258C	HSP78		0.97625	0.061	0.95123	0.058	0.04208	0.061	7e-05
YDR259C	YAP6		1.01262	0.092	0.95729	0.148	0.07503	0.092	0.0002
YDR260C	SWM1		1.07869	0.008	0.99859	0.039	0.07937	0.008	2e-05	status=JK
YDR261C	EXG2		1.03568	0.023	1.03787	0.067	-0.00477	0.023	0
YDR262W	YDR262W		1.03821	0.032	1.05916	0.01	-0.02067	0.032	1e-05
YDR263C	DIN7		1.07368	0.02	1.05305	0.101	0.01256	0.02	0
YDR265W	PEX10		0.97691	0.02	0.99908	0.127	-0.04393	0.02	0.00014	status=JK
YDR266C	HEL2		1.012	0.038	0.98692	0.063	0.02365	0.038	1e-05
YDR269C	YDR269C		1.07058	0.043	1.01329	0.068	0.04869	0.043	2e-05
YDR270W	CCC2		1.02119	0.034	1.04364	0.016	-0.0129	0.034	1e-05
YDR271C	YDR271C		1.029	0.077	1.06301	0.028	-0.03344	0.077	0.00012
YDR272W	GLO2		1.02701	0.004	1.06694	0.024	-0.03426	0.004	1e-05	status=JK
YDR273W	DON1		1.10637	0.097	1.03767	0.012	0.07545	0.097	0.00019
YDR274C	YDR274C		1.127	0.052	1.1018	0.111	0.05047	0.052	3e-05
YDR275W	BSC2		0.94106	0.13	1.03174	0.061	-0.08799	0.13	0.00072
YDR276C	PMP3		0.84125	0.093	0.95404	0.027	-0.11476	0.093	0.00037
YDR277C	MTH1		1.08331	0.082	1.01048	0.017	0.07363	0.082	0.00012
YDR278C	YDR278C		0.93887	0.023	1.0107	0.068	-0.06398	0.023	0.00021	status=JK
YDR279W	RNH202		0.92388	0.061	1.0201	0.025	-0.0972	0.061	8e-05
YDR281C	PHM6		1.03316	0.008	0.99381	0.148	0.05127	0.008	2e-05	status=JK
YDR282C	YDR282C		1.00096	0.029	1.05453	0.065	-0.0448	0.029	1e-05
YDR284C	DPP1		1.02572	0.034	1.02956	0.077	-0.01176	0.034	1e-05
YDR285W	ZIP1		1.04951	0.071	1.01454	0.114	0.02744	0.071	8e-05
YDR286C	YDR286C		0.95929	0.047	1.02019	0.058	-0.05259	0.047	3e-05
YDR287W	INM2		1.0498	0.033	1.10169	0.072	-0.06697	0.033	1e-05
YDR289C	RTT103		0.84209	0.128	0.78717	0.172	0.01169	0.128	0.00095
YDR290W	YDR290W		0.95626	0.054	0.91971	0.064	0.02651	0.054	5e-05
YDR291W	HRQ1		0.81007	0.127	0.68359	0.049	0.1055	0.127	0.00104
YDR293C	SSD1		0.75339	0.123	0.68279	0.15	0.08232	0.123	0.00118
YDR294C	DPL1		1.04539	0.026	0.94013	0.196	0.15483	0.026	0
YDR297W	SUR2		0.88825	0.107	0.94043	0.182	-0.07076	0.107	0.00048
YDR304C	CPR5		1.03009	0.067	1.14468	0.043	-0.13792	0.067	8e-05
YDR305C	HNT2		1.06913	0.038	1.0981	0.056	-0.0278	0.038	1e-05
YDR306C	YDR306C		1.00862	0.023	0.98655	0.096	0.00834	0.023	0
YDR307W	PMT7		0.90377	0.075	0.93002	0.077	-0.04038	0.075	0.00016
YDR309C	GIC2		0.97544	0.01	1.00215	0.011	-0.03184	0.009	3e-05	status=JK
YDR310C	SUM1		0.91679	0.062	0.96853	0.12	-0.02666	0.062	9e-05
YDR312W	SSF2		1.04681	0.053	0.98778	0.043	0.06516	0.053	4e-05
YDR313C	PIB1		1.05506	0.022	0.908	0.048	0.13904	0.022	0
YDR314C	RAD34		1.05041	0.022	1.07621	0.065	-0.02507	0.022	0
YDR315C	IPK1		0.90193	0.06	0.86625	0.003	0.03568	0.06	8e-05
YDR316W	OMS1		0.97721	0.061	0.94613	0.111	0.02566	0.061	7e-05
YDR317W	HIM1		1.11674	0.075	1.06781	0.045	0.05299	0.075	8e-05
YDR318W	MCM21		0.92674	0.098	1.04797	0.057	-0.09457	0.098	0.00032
YDR319C	YFT2		1.05602	0.026	1.04273	0.032	0.01393	0.026	0
YDR320C	SWA2		0.91044	0.034	0.85265	0.005	0.05642	0.034	1e-05
YDR321W	ASP1		1.04134	0.058	1.05775	0.113	0.01441	0.058	5e-05
YDR326C	YSP2		1.04345	0.042	0.8974	0.162	0.12947	0.042	0.00053	status=JK
YDR329C	PEX3		1.04327	0.028	1.02937	0.072	0.02271	0.028	1e-05
YDR330W	UBX5		1.02936	0.006	0.98353	0.053	0.0414	0.006	1e-05	status=JK
YDR332W	IRC3		0.97302	0.02	0.97981	0.079	0.01225	0.02	0
YDR333C	YDR333C		0.98844	0.012	0.96552	0.091	0.02302	0.012	0
YDR334W	SWR1		0.96152	0.038	0.91996	0.032	0.03271	0.038	2e-05
YDR335W	MSN5		1.02083	0.014	1.0756	0.043	-0.06294	0.014	6e-05	status=JK
YDR336W	YDR336W		0.94766	0.056	0.84248	0.065	0.12005	0.056	6e-05
YDR338C	YDR338C		0.94295	0.078	0.94719	0.109	-0.00288	0.078	0.00016
YDR340W	YDR340W		0.96431	0.039	1.0228	0.057	-0.0552	0.039	2e-05
YDR344C	YDR344C		1.02965	0.039	0.95121	0.016	0.07923	0.039	2e-05
YDR345C	HXT3		1.08353	0.006	1.07581	0.039	0.00733	0.006	0
YDR346C	SVF1		1.00007	0.006	1.06301	0.059	-0.04631	0.006	1e-05	status=JK
YDR348C	PAL1		0.98807	0.017	1.00532	0.084	-0.00592	0.017	0.0001	status=JK
YDR349C	YPS7		0.97719	0.031	1.03697	0.024	-0.06765	0.031	1e-05
YDR351W	SBE2		0.98274	0.012	1.02274	0.05	-0.02817	0.012	0
YDR352W	YPQ2		1.03531	0.028	0.99376	0.068	0.05737	0.028	1e-05
YDR354W	TRP4		0.99318	0.038	1.0212	0.081	-0.03005	0.038	2e-05
YDR357C	CNL1		0.97801	0.038	0.9921	0.162	-0.02782	0.038	2e-05
YDR358W	GGA1		1.01845	0.006	0.98491	0.085	0.03265	0.006	1e-05	status=JK
YDR359C	EAF1		0.36035	0.082	0.32543	0.116	0.02853	0.082	0.00307
YDR360W	YDR360W		0.88104	0.04	0.93553	0.054	-0.05243	0.04	3e-05
YDR363W	ESC2		1.0458	0.025	0.92456	0.017	0.12574	0.025	0
YDR363W-A	SEM1		1.0737	0.025	0.97072	0.24	0.04346	0.025	0.00018	status=JK
YDR368W	YPR1		1.02997	0.083	1.06457	0.029	-0.03582	0.083	0.00014
YDR369C	XRS2		0.99574	0.041	0.96822	0.01	0.02372	0.041	2e-05
YDR370C	YDR370C		1.00693	0.038	1.06381	0.108	-0.08596	0.038	2e-05
YDR371W	CTS2		0.99168	0.074	1.04652	0.057	-0.04904	0.074	0.00012
YDR372C	VPS74		0.91427	0.01	0.84616	0.018	0.07232	0.01	4e-05	status=JK
YDR374C	YDR374C		1.01558	0.149	1.04241	0.053	-0.01234	0.149	0.00086
YDR375C	BCS1		0.86887	0.055	0.75161	0.064	0.10246	0.055	7e-05
YDR378C	LSM6		0.69495	0.042	0.6874	0.013	0.0093	0.042	6e-05
YDR379W	RGA2		1.04567	0.025	1.10135	0.007	-0.05326	0.025	0
YDR380W	ARO10		0.99613	0.026	0.9654	0.051	0.03068	0.026	0
YDR382W	RPP2B		1.01716	0.041	1.07719	0.008	-0.06213	0.041	2e-05
YDR383C	NKP1		0.95223	0.092	0.98127	0.008	-0.0252	0.092	0.00025
YDR384C	ATO3		0.95424	0.086	1.08708	0.022	-0.12769	0.086	0.0002
YDR385W	EFT2		0.9148	0.006	0.91097	0.014	-0.00246	0.006	2e-05	status=JK
YDR386W	MUS81		0.99455	0.022	0.89321	0.068	0.11218	0.022	0.00016	status=JK
YDR387C	YDR387C		0.94959	0.054	1.02564	0.06	-0.05625	0.054	5e-05
YDR388W	RVS167		0.72517	0.011	0.86053	0.056	-0.13241	0.011	8e-05	status=JK
YDR389W	SAC7		0.86177	0.032	1.0792	0.038	-0.22068	0.032	1e-05
YDR391C	YDR391C		1.04319	0.031	1.09256	0.038	-0.05616	0.031	1e-05
YDR392W	SPT3		0.84459	0.015	0.75195	0.046	0.09025	0.015	0
YDR393W	SHE9		0.87377	0.069	0.7702	0.061	0.1217	0.069	0.00014
YDR395W	SXM1		1.03796	0.062	0.83094	0.096	0.20823	0.062	6e-05
YDR399W	HPT1		1.06329	0.11	1.03103	0.157	0.07728	0.11	0.00031
YDR400W	URH1		1.05852	0.07	1.08672	0.078	-0.00818	0.07	8e-05
YDR401W	YDR401W		1.10575	0.123	1.09925	0.137	0.02129	0.122	0.00037
YDR402C	DIT2		1.08293	0.042	0.97758	0.054	0.09317	0.042	2e-05
YDR403W	DIT1		1.05561	0.055	0.92504	0.094	0.10924	0.055	4e-05
YDR406W	PDR15		1.05595	0.013	1.06304	0.075	-0.01228	0.013	5e-05	status=JK
YDR408C	ADE8		1.01707	0.038	0.98498	0.103	0.02017	0.038	1e-05
YDR409W	SIZ1		1.02256	0.012	1.14954	0.087	-0.13708	0.012	5e-05	status=JK
YDR410C	STE14		0	0	0	0	0	0	#NUM!
YDR411C	DFM1		1.04919	0.005	1.05003	0.057	0.00169	0.005	1e-05	status=JK
YDR414C	ERD1		0.85869	0.049	0.84013	0.097	0.03034	0.049	5e-05
YDR415C	YDR415C		0.90995	0.171	1.00885	0.184	-0.09917	0.17	0.00176
YDR419W	RAD30		0.92765	0.111	0.93443	0.194	-0.02457	0.111	0.00047
YDR420W	HKR1		1.03557	0.141	0.96853	0.129	0.04266	0.141	0.00068
YDR421W	ARO80		1.00925	0.066	0.95028	0.048	0.0828	0.065	8e-05
YDR422C	SIP1		0.96417	0.012	1.09266	0.029	-0.12001	0.012	5e-05	status=JK
YDR423C	CAD1		1.04197	0.038	1.04276	0.029	0.00155	0.038	1e-05
YDR424C	DYN2		0.97932	0.034	0.91428	0.133	0.04647	0.034	1e-05
YDR425W	SNX41		0.85765	0.005	0.93322	0.068	-0.08162	0.005	1e-05	status=JK
YDR426C	YDR426C		1.01916	0.027	0.9949	0.037	0.03317	0.027	1e-05
YDR428C	BNA7		1.02225	0.004	0.97342	0.029	0.04255	0.004	0	status=JK
YDR430C	CYM1		1.05399	0.046	1.02476	0.013	0.0247	0.046	2e-05
YDR431W	YDR431W		1.10312	0.034	0.99781	0.074	0.11428	0.034	1e-05
YDR435C	PPM1		0.92565	0.032	0.95856	0.047	-0.04115	0.032	1e-05
YDR436W	PPZ2		1.14073	0.064	1.14501	0.045	-0.00814	0.064	5e-05
YDR438W	THI74		0.99164	0.012	0.99798	0.009	-0.00855	0.012	0
YDR439W	LRS4		0.98373	0.009	1.07045	0.038	-0.08779	0.009	3e-05	status=JK
YDR440W	DOT1		1.02704	0.039	0.98687	0.038	0.03477	0.039	2e-05
YDR441C	APT2		1.01669	0.043	0.99406	0.051	0.02626	0.043	2e-05
YDR444W	YDR444W		1.03717	0.04	1.09758	0.022	-0.06741	0.04	2e-05
YDR445C	YDR445C		1.07538	0.03	1.07219	0.058	0.01514	0.03	1e-05
YDR446W	ECM11		0.99733	0.015	1.02441	0.016	-0.02587	0.015	0
YDR447C	RPS17B		0.97083	0.008	0.96045	0.044	0.00553	0.008	0
YDR451C	YHP1		1.03052	0.015	1.03715	0.054	-0.01151	0.015	0
YDR452W	PPN1		1.10378	0.072	1.09289	0.116	0.00457	0.072	8e-05
YDR453C	TSA2		1.06034	0.016	0.99407	0.101	0.05232	0.016	0
YDR455C	YDR455C		0.75048	0.004	0.80143	0.024	-0.04798	0.004	1e-05	status=JK
YDR458C	HEH2		0.93732	0.061	0.98318	0.101	-0.0647	0.061	8e-05
YDR459C	PFA5		0.9247	0.006	0.95235	0.04	-0.02078	0.006	1e-05	status=JK
YDR461W	MFA1		0.99794	0.045	0.92025	0.132	0.07116	0.045	3e-05
YDR463W	STP1		0.96704	0.028	0.7524	0.013	0.21525	0.028	1e-05
YDR465C	RMT2		1.04222	0.04	1.06251	0.049	-0.02891	0.039	2e-05
YDR466W	PKH3		0.97708	0.062	1.06675	0.017	-0.10049	0.062	7e-05
YDR467C	YDR467C		0.99021	0.041	1.01354	0.01	-0.02566	0.041	2e-05
YDR469W	SDC1		0.9853	0.028	0.96675	0.004	0.01655	0.028	0.00026	status=JK
YDR471W	RPL27B		0.95031	0.026	0.97089	0.063	-0.01134	0.026	1e-05
YDR474C	YDR474C		0.98076	0.045	1.09666	0.067	-0.10281	0.045	3e-05
YDR475C	JIP4		0.94013	0.023	1.10149	0.018	-0.16457	0.023	0.0002	status=JK
YDR476C	YDR476C		1.06769	0.106	0.9903	0.009	0.07501	0.106	0.00027
YDR477W	SNF1		0.81533	0.022	0.58991	0.165	0.1874	0.022	0.00025	status=JK
YDR479C	PEX29		1.06392	0.006	0.93161	0.041	0.13057	0.006	1e-05	status=JK
YDR480W	DIG2		1.08571	0.009	0.99044	0.059	0.10149	0.009	2e-05	status=JK
YDR481C	PHO8		1.02376	0.065	1.0755	0.09	-0.05282	0.065	7e-05
YDR482C	CWC21		1.0458	0.042	0.98289	0.077	0.04904	0.042	2e-05
YDR483W	KRE2		1.0291	0.04	1.09895	0.158	-0.07954	0.04	0.00051	status=JK
YDR483W	KRE2		1.04868	0.027	1.01072	0.021	0.03689	0.027	0
YDR485C	VPS72		0.9626	0.036	0.99311	0.009	-0.0296	0.036	1e-05
YDR486C	VPS60		0.81851	0.037	0.93353	0.013	-0.12164	0.037	2e-05
YDR488C	PAC11		0.991	0.006	0.9621	0.131	0.00468	0.006	1e-05	status=JK
YDR490C	PKH1		1.07828	0.04	1.07222	0.05	0.00361	0.04	1e-05
YDR491C	YDR491C		0.98643	0.057	0.98652	0.017	0.00745	0.057	5e-05
YDR492W	IZH1		1.03439	0.075	1.01155	0.039	0.02468	0.075	0.00011
YDR493W	MZM1		0.91135	0.104	0.87406	0.173	0.00444	0.104	0.00041
YDR494W	RSM28		1.02662	0.037	1.0202	0.014	0.00589	0.037	1e-05
YDR496C	PUF6		0.84962	0.012	0.87205	0.005	-0.02232	0.012	6e-05	status=JK
YDR497C	ITR1		1.12017	0.048	1.04984	0.117	0.05345	0.048	2e-05
YDR500C	RPL37B		0	0	0	0	0	0	#NUM!	status=JK
YDR501W	PLM2		1.05652	0.031	1.06233	0.015	-0.01152	0.031	1e-05
YDR502C	SAM2		0.96504	0.151	0.95437	0.186	-0.02142	0.151	0.00104
YDR503C	LPP1		0.9439	0.017	0.98916	0.025	-0.04394	0.017	0.00011	status=JK
YDR504C	SPG3		0.99197	0.012	0.98523	0.067	0.01518	0.012	5e-05	status=JK
YDR505C	PSP1		0.90712	0.041	0.91285	0.064	-0.02291	0.041	3e-05
YDR506C	GMC1		0.99153	0.091	1.01947	0.041	-0.03308	0.091	0.00021
YDR508C	GNP1		1.02732	0.057	1.01423	0.056	0.01997	0.057	5e-05
YDR509W	YDR509W		0.90027	0.105	0.84734	0.063	0.06733	0.105	0.00044
YDR511W	ACN9		1.06222	0.027	1.0899	0.076	-0.03297	0.027	0.00022	status=JK
YDR512C	EMI1		0.7421	0.096	0.53623	0.039	0.20399	0.096	0.00059
YDR513W	GRX2		0.96446	0.016	0.99693	0.042	-0.02858	0.016	0
YDR514C	YDR514C		0.89342	0.071	0.88958	0.062	0.01277	0.071	0.00211	status=JK
YDR515W	SLF1		0.97372	0.029	1.01619	0.044	-0.03546	0.028	1e-05
YDR516C	EMI2		1.07697	0.004	1.11131	0.091	-0.06377	0.004	1e-05	status=JK
YDR517W	GRH1		0.99517	0.006	1.02409	0.055	-0.01563	0.006	1e-05	status=JK
YDR519W	FPR2		0.98106	0.034	0.97812	0.063	0.00194	0.034	1e-05
YDR520C	URC2		1.04349	0.007	0.99268	0.034	0.05337	0.007	1e-05	status=JK
YDR522C	SPS2		1.00753	0.073	1.04698	0.023	-0.03786	0.072	0.0001
YDR524C	AGE1		0.98065	0.15	0.97546	0.157	-0.00099	0.15	0.00096
YDR525W	YDR525W		0.92275	0.139	1.05914	0.091	-0.13751	0.139	0.00093
YDR525W-A	SNA2		1.11289	0.028	1.04924	0.136	0.05276	0.028	0.00021	status=JK
YDR528W	HLR1		1.04517	0.043	0.98443	0.029	0.06721	0.043	2e-05
YDR530C	APA2		1.04673	0.028	0.97449	0.04	0.06787	0.028	1e-05
YDR532C	KRE28		0.26792	0.047	0.18937	0.027	0.07325	0.047	0.00146
YDR533C	HSP31		1.09499	0.026	1.00718	0.004	0.08482	0.026	0
YDR534C	FIT1		1.05031	0.025	1.01329	0.07	0.04619	0.025	0.00019	status=JK
YDR535C	YDR535C		1.00375	0.032	1.02365	0.096	-0.04807	0.032	0.00034	status=JK
YDR536W	STL1		1.06605	0.13	1.02513	0.059	0.02927	0.13	0.00049
YDR537C	YDR537C		0.952	0.089	0.91667	0.037	0.03753	0.089	0.00022
YDR538W	PAD1		0.8057	0.058	0.9174	0.129	-0.09793	0.058	0.0001
YDR539W	FDC1		0.94448	0.133	0.87058	0.145	0.06626	0.133	0.00076
YDR540C	IRC4		0.9643	0.151	1.06722	0.104	-0.07353	0.151	0.00104
YDR541C	YDR541C		1.16866	0.021	1.11769	0.081	0.02434	0.021	0.00011	status=JK
YEL001C	IRC22		#NUM!	#NUM!	#NUM!	#NUM!	#NUM!	#NUM!	#NUM!	status=LK
YEL003W	GIM4		#NUM!	#NUM!	#NUM!	#NUM!	#NUM!	#NUM!	#NUM!	status=LK
YEL004W	YEA4		#NUM!	#NUM!	#NUM!	#NUM!	#NUM!	#NUM!	#NUM!	status=LK
YEL005C	VAB2		#NUM!	#NUM!	#NUM!	#NUM!	#NUM!	#NUM!	#NUM!	status=LK
YEL006W	YEA6		#NUM!	#NUM!	#NUM!	#NUM!	#NUM!	#NUM!	#NUM!	status=LK
YEL007W	MIT1		#NUM!	#NUM!	#NUM!	#NUM!	#NUM!	#NUM!	#NUM!	status=LK
YEL008W	YEL008W		#NUM!	#NUM!	#NUM!	#NUM!	#NUM!	#NUM!	#NUM!	status=LK
YEL010W	YEL010W		#NUM!	#NUM!	#NUM!	#NUM!	#NUM!	#NUM!	#NUM!	status=LK
YEL011W	GLC3		#NUM!	#NUM!	#NUM!	#NUM!	#NUM!	#NUM!	#NUM!	status=LK
YEL012W	UBC8		#NUM!	#NUM!	#NUM!	#NUM!	#NUM!	#NUM!	#NUM!	status=LK
YEL013W	VAC8		#NUM!	#NUM!	#NUM!	#NUM!	#NUM!	#NUM!	#NUM!	status=LK
YEL014C	YEL014C		#NUM!	#NUM!	#NUM!	#NUM!	#NUM!	#NUM!	#NUM!	status=LK
YEL015W	EDC3		#NUM!	#NUM!	#NUM!	#NUM!	#NUM!	#NUM!	#NUM!	status=LK
YEL016C	NPP2		#NUM!	#NUM!	#NUM!	#NUM!	#NUM!	#NUM!	#NUM!	status=LK
YEL017C-A	PMP2		#NUM!	#NUM!	#NUM!	#NUM!	#NUM!	#NUM!	#NUM!	status=LK
YEL017W	GTT3		#NUM!	#NUM!	#NUM!	#NUM!	#NUM!	#NUM!	#NUM!	status=LK
YEL020C	YEL020C		#NUM!	#NUM!	#NUM!	#NUM!	#NUM!	#NUM!	#NUM!	status=LK
YEL023C	YEL023C		#NUM!	#NUM!	#NUM!	#NUM!	#NUM!	#NUM!	#NUM!	status=LK
YEL025C	YEL025C		#NUM!	#NUM!	#NUM!	#NUM!	#NUM!	#NUM!	#NUM!	status=LK
YEL028W	YEL028W		#NUM!	#NUM!	#NUM!	#NUM!	#NUM!	#NUM!	#NUM!	status=LK
YEL030W	ECM10		#NUM!	#NUM!	#NUM!	#NUM!	#NUM!	#NUM!	#NUM!	status=LK
YEL031W	SPF1		#NUM!	#NUM!	#NUM!	#NUM!	#NUM!	#NUM!	#NUM!	status=LK
YEL033W	MTC7		#NUM!	#NUM!	#NUM!	#NUM!	#NUM!	#NUM!	#NUM!	status=LK
YEL037C	RAD23		#NUM!	#NUM!	#NUM!	#NUM!	#NUM!	#NUM!	#NUM!	status=LK
YEL038W	UTR4		#NUM!	#NUM!	#NUM!	#NUM!	#NUM!	#NUM!	#NUM!	status=LK
YEL039C	CYC7		#NUM!	#NUM!	#NUM!	#NUM!	#NUM!	#NUM!	#NUM!	status=LK
YEL040W	UTR2		#NUM!	#NUM!	#NUM!	#NUM!	#NUM!	#NUM!	#NUM!	status=LK
YEL041W	YEF1		#NUM!	#NUM!	#NUM!	#NUM!	#NUM!	#NUM!	#NUM!	status=LK
YEL042W	GDA1		#NUM!	#NUM!	#NUM!	#NUM!	#NUM!	#NUM!	#NUM!	status=LK
YEL043W	YEL043W		#NUM!	#NUM!	#NUM!	#NUM!	#NUM!	#NUM!	#NUM!	status=LK
YEL047C	FRD1		#NUM!	#NUM!	#NUM!	#NUM!	#NUM!	#NUM!	#NUM!	status=LK
YEL048C	TCA17		#NUM!	#NUM!	#NUM!	#NUM!	#NUM!	#NUM!	#NUM!	status=LK
YEL049W	PAU2		#NUM!	#NUM!	#NUM!	#NUM!	#NUM!	#NUM!	#NUM!	status=LK
YEL052W	AFG1		#NUM!	#NUM!	#NUM!	#NUM!	#NUM!	#NUM!	#NUM!	status=LK
YEL053C	MAK10		#NUM!	#NUM!	#NUM!	#NUM!	#NUM!	#NUM!	#NUM!	status=LK
YEL056W	HAT2		#NUM!	#NUM!	#NUM!	#NUM!	#NUM!	#NUM!	#NUM!	status=LK
YEL057C	YEL057C		#NUM!	#NUM!	#NUM!	#NUM!	#NUM!	#NUM!	#NUM!	status=LK
YEL059W	YEL059W		#NUM!	#NUM!	#NUM!	#NUM!	#NUM!	#NUM!	#NUM!	status=LK
YEL060C	PRB1		#NUM!	#NUM!	#NUM!	#NUM!	#NUM!	#NUM!	#NUM!	status=LK
YEL061C	CIN8		#NUM!	#NUM!	#NUM!	#NUM!	#NUM!	#NUM!	#NUM!	status=LK
YEL062W	NPR2		#NUM!	#NUM!	#NUM!	#NUM!	#NUM!	#NUM!	#NUM!	status=LK
YEL063C	CAN1		#NUM!	#NUM!	#NUM!	#NUM!	#NUM!	#NUM!	#NUM!	status=LK
YEL064C	AVT2		#NUM!	#NUM!	#NUM!	#NUM!	#NUM!	#NUM!	#NUM!	status=LK
YEL065W	SIT1		#NUM!	#NUM!	#NUM!	#NUM!	#NUM!	#NUM!	#NUM!	status=LK
YEL066W	HPA3		#NUM!	#NUM!	#NUM!	#NUM!	#NUM!	#NUM!	#NUM!	status=LK
YEL067C	YEL067C		#NUM!	#NUM!	#NUM!	#NUM!	#NUM!	#NUM!	#NUM!	status=LK
YEL068C	YEL068C		#NUM!	#NUM!	#NUM!	#NUM!	#NUM!	#NUM!	#NUM!	status=LK
YEL071W	DLD3		#NUM!	#NUM!	#NUM!	#NUM!	#NUM!	#NUM!	#NUM!	status=LK
YER001W	MNN1		#NUM!	#NUM!	#NUM!	#NUM!	#NUM!	#NUM!	#NUM!	status=LK
YER002W	NOP16		#NUM!	#NUM!	#NUM!	#NUM!	#NUM!	#NUM!	#NUM!	status=LK
YER004W	FMP52		#NUM!	#NUM!	#NUM!	#NUM!	#NUM!	#NUM!	#NUM!	status=LK
YER005W	YND1		#NUM!	#NUM!	#NUM!	#NUM!	#NUM!	#NUM!	#NUM!	status=LK
YER007C-A	TMA20		#NUM!	#NUM!	#NUM!	#NUM!	#NUM!	#NUM!	#NUM!	status=LK
YER007W	PAC2		#NUM!	#NUM!	#NUM!	#NUM!	#NUM!	#NUM!	#NUM!	status=LK
YER010C	YER010C		#NUM!	#NUM!	#NUM!	#NUM!	#NUM!	#NUM!	#NUM!	status=LK
YER011W	TIR1		#NUM!	#NUM!	#NUM!	#NUM!	#NUM!	#NUM!	#NUM!	status=LK
YER016W	BIM1		#NUM!	#NUM!	#NUM!	#NUM!	#NUM!	#NUM!	#NUM!	status=LK
YER019C-A	SBH2		#NUM!	#NUM!	#NUM!	#NUM!	#NUM!	#NUM!	#NUM!	status=LK
YER019W	ISC1		#NUM!	#NUM!	#NUM!	#NUM!	#NUM!	#NUM!	#NUM!	status=LK
YER020W	GPA2		#NUM!	#NUM!	#NUM!	#NUM!	#NUM!	#NUM!	#NUM!	status=LK
YER024W	YAT2		#NUM!	#NUM!	#NUM!	#NUM!	#NUM!	#NUM!	#NUM!	status=LK
YER027C	GAL83		#NUM!	#NUM!	#NUM!	#NUM!	#NUM!	#NUM!	#NUM!	status=LK
YER028C	MIG3		#NUM!	#NUM!	#NUM!	#NUM!	#NUM!	#NUM!	#NUM!	status=LK
YER030W	CHZ1		#NUM!	#NUM!	#NUM!	#NUM!	#NUM!	#NUM!	#NUM!	status=LK
YER031C	YPT31		#NUM!	#NUM!	#NUM!	#NUM!	#NUM!	#NUM!	#NUM!	status=LK
YER032W	FIR1		#NUM!	#NUM!	#NUM!	#NUM!	#NUM!	#NUM!	#NUM!	status=LK
YER033C	ZRG8		#NUM!	#NUM!	#NUM!	#NUM!	#NUM!	#NUM!	#NUM!	status=LK
YER034W	YER034W		#NUM!	#NUM!	#NUM!	#NUM!	#NUM!	#NUM!	#NUM!	status=LK
YER035W	EDC2		#NUM!	#NUM!	#NUM!	#NUM!	#NUM!	#NUM!	#NUM!	status=LK
YER038W-A	YER038W-A		#NUM!	#NUM!	#NUM!	#NUM!	#NUM!	#NUM!	#NUM!	status=LK
YER039C	HVG1		#NUM!	#NUM!	#NUM!	#NUM!	#NUM!	#NUM!	#NUM!	status=LK
YER039C-A	YER039C-A		#NUM!	#NUM!	#NUM!	#NUM!	#NUM!	#NUM!	#NUM!	status=LK
YER041W	YEN1		0.96341	0.076	0.98289	0.076	-0.01564	0.076	0.00013
YER042W	MXR1		1.02916	0.089	0.93397	0.066	0.08118	0.089	0.00017
YER044C-A	MEI4		0.80819	0.01	0.89209	0.125	-0.1145	0.01	5e-05	status=JK
YER045C	ACA1		0.88599	0.076	0.99532	0.1	-0.12426	0.076	0.00246	status=JK
YER046W	SPO73		0.88374	0.144	1.11073	0.009	-0.23239	0.144	0.00117
YER046W-A	YER046W-A		0.9373	0.004	0.98815	0.09	-0.03746	0.004	0
YER047C	SAP1		0.95073	0.02	0.92955	0.083	0.04214	0.02	0.00015	status=JK
YER048C	CAJ1		0.87458	0.003	0.91134	0.004	-0.03965	0.003	1e-05	status=JK
YER049W	TPA1		0.91944	0.036	0.92976	0.046	-0.00818	0.036	2e-05
YER051W	JHD1		1.04175	0.002	1.02501	0.012	0.01281	0.002	0	status=JK
YER052C	HOM3		0.86283	0.058	0.97116	0.069	-0.11193	0.058	8e-05
YER053C	PIC2		1.12039	0.044	1.08558	0.037	0.0349	0.044	2e-05
YER054C	GIP2		1.14087	0.066	1.0968	0.013	0.04532	0.066	5e-05
YER055C	HIS1		0.49098	0.087	0.13634	0.012	0.353	0.087	0.00147
YER056C	FCY2		1.15028	0.06	1.14785	0.084	-0.00541	0.06	4e-05
YER056C-A	RPL34A		1.00379	0.068	0.87199	0.107	0.10543	0.068	9e-05
YER057C	HMF1		1.10578	0.093	1.13577	0.037	-0.03944	0.093	0.00016
YER059W	PCL6		0.89866	0.104	0.95324	0.012	-0.05329	0.104	0.00042
YER060W	FCY21		0.98455	0.036	0.96158	0.072	0.02028	0.036	1e-05
YER060W-A	FCY22		0.98406	0.034	1.01762	0.025	-0.03377	0.034	1e-05
YER061C	CEM1		0.89228	0.069	0.8336	0.047	0.04448	0.069	0.00012
YER062C	HOR2		1.00977	0.032	1.05413	0.042	-0.03971	0.032	1e-05
YER063W	THO1		1.01607	0.017	0.95506	0.038	0.06564	0.017	0
YER064C	VHR2		1.01271	0.003	0.98221	0.055	0.03	0.003	0	status=JK
YER065C	ICL1		1.10721	0.089	1.04928	0.071	0.06961	0.089	0.00014
YER066C-A	YER066C-A		0.95024	0.023	0.98343	0.004	-0.03516	0.023	0
YER066W	RRT13		0.99718	0.027	0.99283	0.018	-0.00129	0.027	1e-05
YER067C-A	YER067C-A		1.00668	0.01	1.00091	0.044	0.00611	0.01	3e-05	status=JK
YER067W	RGI1		0.95714	0.066	1.0331	0.086	-0.05357	0.066	9e-05
YER069W	ARG5		0.64619	0.037	0.1601	0.007	0.48723	0.037	5e-05
YER071C	TDA2		0.98883	0.033	1.03867	0.042	-0.04871	0.033	1e-05
YER072W	VTC1		1.02411	0.027	1.05642	0.046	-0.03416	0.027	1e-05
YER073W	ALD5		1.02908	0.047	1.01817	0.027	0.00898	0.047	3e-05
YER074W	RPS24A		0.76286	0.096	0.53416	0.051	0.22814	0.096	0.00054
YER075C	PTP3		0.92989	0.068	0.99166	0.073	-0.07809	0.068	0.00011
YER077C	YER077C		1.04095	0.025	0.98715	0.028	0.0586	0.025	0
YER078C	ICP55		0.95032	0.084	0.9394	0.027	0.00454	0.084	0.00019
YER079W	YER079W		0.93023	0.045	0.959	0.065	-0.04028	0.045	3e-05
YER080W	AIM9		1.07996	0.022	0.99757	0.101	0.06089	0.022	0
YER081W	SER3		0.99887	0.01	1.01445	0.023	-0.01082	0.01	3e-05	status=JK
YER083C	GET2		0.89731	0.006	0.868	0.072	0.01663	0.006	1e-05	status=JK
YER084W	YER084W		1.00746	0.059	0.94617	0.031	0.06825	0.059	5e-05
YER085C	YER085C		1.03477	0.018	1.09812	0.056	-0.07917	0.018	0
YER087C-A	YER087C-A		1.07118	0.069	1.02065	0.051	0.03953	0.069	7e-05
YER088C	DOT6		0.94434	0.026	0.97297	0.076	-0.03457	0.026	1e-05
YER089C	PTC2		0.94799	0.012	0.95657	0.1	-0.00744	0.012	5e-05	status=JK
YER090W	TRP2		0.9779	0.023	1.14762	0.116	-0.18008	0.023	0.00019	status=JK
YER091C	MET6		0.98286	0.062	0.96736	0.019	0.01438	0.062	7e-05
YER091C-A	YER091C-A		1.05003	0.019	1.05589	0.016	-0.00387	0.019	0
YER092W	IES5		1.09193	0.078	0.94099	0.034	0.15434	0.078	0.0001
YER093C-A	AIM11		0.89764	0.046	0.6072	0.078	0.30719	0.045	4e-05
YER095W	RAD51		0.97287	0.028	0.92342	0.055	0.04957	0.028	1e-05
YER096W	SHC1		1.00048	0.028	1.00132	0.051	-0.00498	0.028	1e-05
YER097W	YER097W		1.01262	0.014	1.02051	0.02	-0.00597	0.014	0
YER098W	UBP9		1.04762	0.005	1.0681	0.047	-0.02099	0.005	1e-05	status=JK
YER101C	AST2		1.00991	0.027	0.98644	0.032	0.02064	0.027	1e-05
YER106W	MAM1		0.89428	0.031	1.00872	0.135	-0.10043	0.031	1e-05
YER108C	YER108C		1.11928	0.04	1.06222	0.075	0.05823	0.04	1e-05
YER109C	FLO8		0.99154	0.09	1.06038	0.042	-0.07198	0.09	0.0002
YER111C	SWI4		0.91789	0.021	0.81864	0.129	0.09244	0.021	0.00017	status=JK
YER113C	TMN3		1.07049	0.04	1.04841	0.044	0.03054	0.04	1e-05
YER114C	BOI2		1.04832	0.083	1.03471	0.039	0.02038	0.083	0.00014
YER115C	SPR6		1.05034	0.066	1.09255	0.015	-0.04226	0.066	7e-05
YER116C	SLX8		0.61348	0.022	0.25428	0.034	0.35557	0.022	1e-05
YER117W	RPL23B		1.06789	0.036	0.93644	0.1	0.13916	0.036	1e-05
YER118C	SHO1		0.99517	0.122	1.02839	0.077	-0.03125	0.122	0.0005
YER119C	AVT6		1.04399	0.079	1.06219	0.098	-0.04774	0.079	0.00012
YER119C-A	YER119C-A		0.87946	0.036	0.90842	0.057	-0.02587	0.036	0.00056	status=JK
YER120W	SCS2		0.82472	0.11	0.86676	0.004	-0.04172	0.11	0.00065
YER121W	YER121W		0.99868	0.043	1.14315	0.019	-0.1388	0.043	0.00061	status=JK
YER123W	YCK3		0.9654	0.104	0.95963	0.063	0.01112	0.104	0.00034
YER124C	DSE1		0.9786	0.067	0.98964	0.078	-0.02971	0.067	9e-05
YER128W	VFA1		1.05088	0.007	1.02616	0.024	0.02679	0.007	2e-05	status=JK
YER129W	SAK1		1.03541	0.021	1.03224	0.039	-0.00548	0.021	0
YER130C	YER130C		1.01259	0.029	0.97411	0.067	0.02078	0.029	1e-05
YER131W	RPS26B		0.93264	0.022	0.86324	0.128	0.09015	0.022	0.00019	status=JK
YER132C	PMD1		1.15017	0.069	1.07351	0.074	0.06545	0.069	6e-05
YER134C	YER134C		0.95124	0.115	0.92238	0.121	0.01303	0.114	0.00047
YER135C	YER135C		0.85796	0.201	0.94696	0.168	-0.09197	0.201	0.00338
YER137C	YER137C		0.95477	0.125	1.05332	0.101	-0.0951	0.125	0.00061
YER139C	RTR1		0.90987	0.038	0.84439	0.019	0.06444	0.038	0.00058	status=JK
YER140W	YER140W		0.94779	0.015	1.01373	0.05	-0.06648	0.015	9e-05	status=JK
YER142C	MAG1		1.01946	0.024	1.01448	0.05	-0.00284	0.024	0
YER143W	DDI1		1.04889	0.06	1.13724	0.129	-0.06809	0.06	5e-05
YER144C	UBP5		1.11503	0.06	1.07261	0.13	0.02753	0.06	4e-05
YER145C	FTR1		1.02396	0.012	1.02281	0.062	-0.01065	0.012	5e-05	status=JK
YER149C	PEA2		0.94798	0.013	0.97516	0.053	-0.02997	0.013	6e-05	status=JK
YER150W	SPI1		0.99442	0.029	1.01688	0.06	-0.041	0.029	1e-05
YER151C	UBP3		0.83267	0.036	0.6633	0.078	0.14403	0.036	2e-05
YER152C	YER152C		1.10504	0.04	1.07049	0.005	0.03008	0.04	1e-05
YER153C	PET122		0.90821	0.032	0.86852	0.046	0.02901	0.032	1e-05
YER155C	BEM2		1.01154	0.022	0.84243	0.029	0.16941	0.022	0.00016	status=JK
YER156C	YER156C		0.90969	0.019	0.99791	0.071	-0.0899	0.019	0
YER158C	YER158C		1.11822	0.101	1.13264	0.027	-0.01891	0.101	0.0002
YER161C	SPT2		0.92806	0.047	0.94984	0.093	-0.01555	0.047	4e-05
YER162C	RAD4		0.91112	0.025	0.78476	0.266	0.10607	0.025	0.00025	status=JK
YER163C	GCG1		1.01904	0.02	0.99018	0.093	0.03671	0.02	0.00013	status=JK
YER164W	CHD1		1.07045	0.057	1.06067	0.077	-0.0023	0.057	4e-05
YER166W	DNF1		1.00403	0.072	1.03396	0.073	-0.013	0.072	0.0001
YER167W	BCK2		1.03245	0.032	1.01782	0.022	0.01649	0.032	1e-05
YER170W	ADK2		1.04408	0.016	1.02481	0.034	0.01362	0.016	0
YER173W	RAD24		1.0769	0.008	0.99702	0.015	0.07565	0.008	2e-05	status=JK
YER174C	GRX4		1.05333	0.006	1.00423	0.01	0.04257	0.006	1e-05	status=JK
YER175C	TMT1		0.96965	0.04	0.96885	0.008	-0.00391	0.04	2e-05
YER176W	ECM32		1.02005	0.003	0.98633	0.022	0.03353	0.003	0	status=JK
YER177W	BMH1		0.90875	0.106	0.83704	0.055	0.05851	0.106	0.00044
YER178W	PDA1		0.87008	0.011	0.774	0.052	0.08662	0.011	6e-05	status=JK
YER179W	DMC1		0.99679	0.041	0.93803	0.057	0.04928	0.041	2e-05
YER180C	ISC10		1.02906	0.004	1.04603	0.028	-0.028	0.004	1e-05	status=JK
YER181C	YER181C		1.02397	0.006	0.98821	0.032	0.03094	0.006	0
YER182W	FMP10		1.06704	0.032	0.93465	0.024	0.14073	0.032	1e-05
YER183C	FAU1		1.01067	0.012	1.04222	0.067	-0.03141	0.012	4e-05	status=JK
YER184C	YER184C		1.05576	0.027	1.08434	0.038	-0.03201	0.027	0
YER185W	PUG1		0.97749	0.024	1.01794	0.029	-0.04401	0.024	0
YER186C	YER186C		1.04076	0.059	0.96531	0.026	0.08756	0.059	5e-05
YER187W	YER187W		1.03894	0.045	1.05042	0.024	-0.02133	0.045	2e-05
YER188W	YER188W		0.94673	0.008	0.99171	0.057	-0.05602	0.008	3e-05	status=JK
YFL001W	DEG1		0.80372	0.022	0.67565	0.075	0.11884	0.022	1e-05
YFL003C	MSH4		0.93573	0.045	0.96473	0.001	-0.02813	0.045	3e-05
YFL004W	VTC2		1.02322	0.019	0.96957	0.035	0.05649	0.019	0
YFL006W	YFL006W		0.91905	0.013	0.94807	0.083	-0.02715	0.013	7e-05	status=JK
YFL007W	BLM10		1.00904	0.06	0.95738	0.055	0.03705	0.059	6e-05
YFL010C	WWM1		0.91579	0.235	1.0356	0.129	-0.12913	0.235	0.0044
YFL010W-A	AUA1		1.0683	0.028	1.07293	0.036	-0.0099	0.028	0
YFL011W	HXT10		0.94403	0.083	1.0034	0.07	-0.07713	0.083	0.00019
YFL012W	YFL012W		1.03903	0.032	1.05372	0.052	-0.00363	0.032	1e-05
YFL013C	IES1		1.07464	0.165	0.89387	0.041	0.20151	0.164	0.00097
YFL013W-A	YFL013W-A		0.91271	0.124	0.8609	0.047	0.04593	0.124	0.00068
YFL014W	HSP12		1.10634	0.041	1.12555	0.031	-0.0195	0.041	1e-05
YFL015C	YFL015C		1.03891	0.026	1.10279	0.051	-0.04127	0.026	0.00021	status=JK
YFL018C	LPD1		0.81876	0.006	0.83789	0.027	-0.00988	0.006	2e-05	status=JK
YFL019C	YFL019C		0.91743	0.052	1.02121	0.038	-0.09741	0.052	5e-05
YFL020C	PAU5		1.05773	0.082	1.08792	0.061	-0.02014	0.082	0.00013
YFL021W	GAT1		1.01554	0.056	1.07039	0.072	-0.06522	0.056	5e-05
YFL023W	BUD27		0.78933	0.065	0.78386	0.052	0.0117	0.065	0.00015
YFL025C	BST1		0.91355	0.064	1.09106	0.125	-0.18833	0.064	9e-05
YFL026W	STE2		0	0	0	0	0	0	#NUM!
YFL027C	GYP8		1.04172	0.035	1.02797	0.049	0.0204	0.035	1e-05
YFL028C	CAF16		1.03549	0.018	1.02785	0.031	0.00595	0.018	0
YFL030W	AGX1		1.01401	0.032	0.95104	0.091	0.05064	0.032	1e-05
YFL031W	HAC1		0.9559	0.074	0.92216	0.017	0.03412	0.074	0.00013
YFL032W	YFL032W		0.89368	0.063	0.96439	0.038	-0.07572	0.063	0.0001
YFL033C	RIM15		1.06858	0.027	1.06491	0.071	-0.00048	0.027	0
YFL034C-A	RPL22B		1.01774	0.04	1.04055	0.078	-0.0352	0.04	2e-05
YFL034W	YFL034W		1.10025	0.014	1.00395	0.066	0.10615	0.014	6e-05	status=JK
YFL035C-B	YFL035C-B		1.05385	0.083	1.02282	0.07	0.0348	0.083	0.00014
YFL036W	RPO41		0.77044	0.021	0.88267	0.006	-0.11347	0.021	0.00024	status=JK
YFL040W	YFL040W		1.0318	0.021	0.9876	0.04	0.05504	0.021	0
YFL041W	FET5		1.0532	0.043	1.08213	0.042	-0.02236	0.043	2e-05
YFL042C	YFL042C		1.04244	0.024	1.05711	0.042	-0.00567	0.024	0
YFL043C	YFL043C		1.02386	0.033	1.04471	0.017	-0.0218	0.033	1e-05
YFL044C	OTU1		0.9949	0.041	0.9929	0.058	0.00291	0.041	2e-05
YFL046W	FMP32		0.97049	0.051	0.95512	0.073	-0.00971	0.051	4e-05
YFL047W	RGD2		0.98807	0.031	1.00148	0.054	-0.02775	0.031	1e-05
YFL048C	EMP47		1.0008	0.151	1.0204	0.095	-0.01425	0.151	0.00093
YFL049W	SWP82		1.14008	0.077	1.04787	0.117	0.09436	0.076	8e-05
YFL050C	ALR2		0.95885	0.094	0.97839	0.035	-0.01853	0.094	0.00026
YFL051C	YFL051C		0.96212	0.056	0.93044	0.048	0.0419	0.056	5e-05
YFL052W	YFL052W		1.04139	0.013	0.98809	0.02	0.04884	0.013	0
YFL053W	DAK2		0.97934	0.029	1.04696	0.031	-0.06801	0.029	1e-05
YFL054C	YFL054C		1.04453	0.006	1.10846	0.051	-0.07946	0.006	1e-05	status=JK
YFL055W	AGP3		1.01227	0.026	1.04624	0.005	-0.03318	0.026	0
YFL056C	AAD6		0.95474	0.044	0.9396	0.112	-0.00821	0.044	3e-05
YFL063W	YFL063W		1.0206	0.036	1.06719	0.065	-0.0334	0.036	1e-05
YFR006W	YFR006W		1.07159	0.033	1.03735	0.033	0.03152	0.033	1e-05
YFR007W	YFH7		1.06235	0.01	1.0444	0.006	0.01438	0.01	3e-05	status=JK
YFR008W	FAR7		1.03837	0.042	1.07686	0.027	-0.03872	0.041	2e-05
YFR009W	GCN20		0.87656	0.174	0.97127	0.027	-0.09095	0.174	0.00207
YFR010W	UBP6		0.66324	0.063	0.64713	0.078	0.01282	0.063	0.00024
YFR011C	AIM13		0.99555	0.055	0.88719	0.058	0.13139	0.055	5e-05
YFR012W	DCV1		0.99079	0.096	1.04229	0.051	-0.05223	0.096	0.00025
YFR013W	IOC3		1.00041	0.057	1.03613	0.017	-0.02863	0.057	5e-05
YFR014C	CMK1		0.97478	0.043	1.05505	0.054	-0.07041	0.043	2e-05
YFR015C	GSY1		1.02532	0.06	1.06377	0.103	-0.0234	0.06	5e-05
YFR016C	YFR016C		0.99867	0.035	0.99306	0.052	0.01851	0.035	1e-05
YFR017C	IGD1		1.00079	0.003	0.95576	0.051	0.04427	0.003	0	status=JK
YFR018C	YFR018C		1.03753	0.05	1.00481	0.04	0.0448	0.05	3e-05
YFR019W	FAB1		0.72154	0.084	0.65744	0.066	0.08294	0.084	0.00043
YFR020W	YFR020W		1.11159	0.071	1.03919	0.023	0.08403	0.071	7e-05
YFR021W	ATG18		0.93819	0.046	0.88857	0.073	0.06827	0.046	3e-05
YFR022W	ROG3		1.08429	0.013	1.08458	0.024	-0.00401	0.013	5e-05	status=JK
YFR023W	PES4		1.01581	0.089	0.99827	0.01	0.01425	0.089	0.00018
YFR024C	YFR024C		1.05293	0.023	0.95025	0.106	0.12311	0.023	0.00016	status=JK
YFR024C-A	LSB3		1.03118	0.097	1.02193	0.03	0.01333	0.097	0.00023
YFR025C	HIS2		0.48062	0.109	0.1448	0.009	0.33316	0.109	0.00305
YFR026C	ULI1		0.99459	0.019	1.05547	0.003	-0.06081	0.019	0
YFR030W	MET10		1.02833	0.028	1.04257	0.041	-0.0184	0.028	1e-05
YFR031C-A	RPL2A		0.92636	0.013	0.9859	0.084	-0.05515	0.013	7e-05	status=JK
YFR032C	RRT5		1.0453	0.02	1.05488	0.085	0.00799	0.02	0
YFR032C-A	RPL29		0.91922	0.02	0.89277	0.014	0.0274	0.02	0.00016	status=JK
YFR033C	QCR6		0.93732	0.041	0.89175	0.059	0.04019	0.041	2e-05
YFR034C	PHO4		0.93289	0.051	0.99876	0.031	-0.06093	0.051	4e-05
YFR035C	YFR035C		0.94293	0.017	0.95034	0.039	0.00692	0.017	0.00011	status=JK
YFR038W	IRC5		1.04814	0.085	1.01853	0.049	0.04186	0.085	0.00015
YFR039C	YFR039C		1.04406	0.021	1.03416	0.024	0.01462	0.021	0
YFR040W	SAP155		0.96441	0.032	1.07922	0.037	-0.12279	0.032	1e-05
YFR041C	ERJ5		0.99485	0.045	1.00998	0.053	-0.03121	0.045	0.00069	status=JK
YFR043C	IRC6		0.99717	0.047	1.06402	0.056	-0.07275	0.047	3e-05
YFR044C	DUG1		1.00899	0.055	1.10914	0.036	-0.09112	0.055	5e-05
YFR045W	YFR045W		0.92314	0.066	1.08517	0.069	-0.15003	0.066	0.0001
YFR046C	CNN1		1.01747	0.053	1.07059	0.002	-0.05187	0.053	4e-05
YFR047C	BNA6		0.99705	0.037	0.92651	0.015	0.07124	0.037	1e-05
YFR048W	RMD8		1.00288	0.021	0.94234	0.059	0.05791	0.021	0
YFR049W	YMR31		0.95948	0.076	1.03461	0.011	-0.07541	0.076	0.00014
YFR053C	HXK1		1.03137	0.068	0.97637	0.03	0.05298	0.068	8e-05
YFR054C	YFR054C		1.00333	0.027	1.01222	0.048	-0.00795	0.027	1e-05
YFR055W	IRC7		1.01066	0.044	1.0017	0.017	0.00594	0.044	2e-05
YFR056C	YFR056C		0.98115	0.067	1.01761	0.039	-0.0308	0.067	9e-05
YFR057W	YFR057W		0.98958	0.033	1.06772	0.031	-0.07967	0.033	1e-05
YGL002W	ERP6		1.04635	0.01	1.01706	0.005	0.02918	0.01	3e-05	status=JK
YGL004C	RPN14		1.00712	0.009	0.95575	0.017	0.05338	0.009	3e-05	status=JK
YGL005C	COG7		0.98759	0.018	0.84007	0.073	0.16281	0.018	0
YGL006W	PMC1		1.08253	0.015	1.07072	0.055	0.02368	0.015	0
YGL007W	YGL007W		0.83427	0.059	0.97878	0.011	-0.14985	0.059	0.0001
YGL009C	LEU1		0.83862	0.01	0.22278	0.01	0.61479	0.01	5e-05	status=JK
YGL010W	YGL010W		1.01568	0.072	1.03556	0.077	-0.01384	0.072	0.0001
YGL013C	PDR1		1.01826	0.019	1.00712	0.019	0.01271	0.019	0
YGL014W	PUF4		1.05363	0.003	1.08981	0.042	-0.04393	0.003	0	status=JK
YGL015C	YGL015C		1.0106	0.032	0.99685	0.062	0.00209	0.032	1e-05
YGL016W	KAP122		0.8311	0.091	0.70733	0.099	0.14606	0.091	0.00036
YGL017W	ATE1		1.01052	0.064	1.02031	0.072	-0.02486	0.064	7e-05
YGL019W	CKB1		0.85149	0.067	0.81872	0.098	0.01457	0.067	0.00013
YGL020C	GET1		0.89601	0.044	0.98203	0.067	-0.07455	0.044	3e-05
YGL021W	ALK1		1.00629	0.032	0.99165	0.066	0.02077	0.032	0.00034	status=JK
YGL023C	PIB2		1.11768	0.128	1.05815	0.086	0.05532	0.127	0.0004
YGL024W	YGL024W		1.36692	0.011	0.96028	0.024	0.41157	0.011	2e-05	status=JK
YGL026C	TRP5		0	0	0	0	0	0	#NUM!
YGL027C	CWH41		0.99866	0.014	1.03379	0.061	-0.02247	0.014	0
YGL028C	SCW11		1.01401	0.015	1.11154	0.063	-0.11278	0.015	0
YGL029W	CGR1		0.85839	0.023	0.87417	0.021	-0.01076	0.023	0.00024	status=JK
YGL031C	RPL24A		0.79944	0.041	0.86373	0.046	-0.0529	0.041	4e-05
YGL032C	AGA2		1.05933	0.006	1.09454	0.07	-0.03987	0.006	1e-05	status=JK
YGL034C	YGL034C		1.03824	0.142	1.05548	0.019	-0.02093	0.142	0.00069
YGL035C	MIG1		1.0946	0.022	1.01207	0.013	0.08585	0.022	0.00013	status=JK
YGL036W	YGL036W		0.92265	0.024	0.94123	0.048	-0.02311	0.024	0.00022	status=JK
YGL037C	PNC1		0.98756	0.033	1.0201	0.044	-0.04476	0.033	1e-05
YGL039W	YGL039W		1.05743	0.114	1.00977	0.024	0.03956	0.114	0.00034
YGL041C	YGL041C		0.99264	0.038	0.95712	0.063	0.04789	0.037	1e-05
YGL042C	YGL042C		1.00333	0.103	0.9263	0.019	0.08307	0.103	0.00029
YGL043W	DST1		0.92034	0.023	0.6056	0.023	0.30934	0.023	0
YGL045W	RIM8		0	0	0	0	0	0	#NUM!	status=JK
YGL046W	YGL046W		1.01858	0.018	0.87148	0.037	0.15197	0.018	0
YGL049C	TIF4632		1.0886	0.046	1.08455	0.127	0.01569	0.046	2e-05
YGL050W	TYW3		1.10999	0.042	1.00627	0.044	0.09828	0.042	2e-05
YGL051W	MST27		1.02067	0.018	0.97155	0.134	0.01849	0.018	0.00011	status=JK
YGL053W	PRM8		1.04005	0.07	1.10473	0.063	-0.06138	0.069	8e-05
YGL054C	ERV14		0.93764	0.075	0.96409	0.076	-0.03667	0.075	0.00014
YGL056C	SDS23		0.88203	0.163	0.91246	0.166	-0.06301	0.163	0.00169
YGL057C	GEP7		0.62782	0.031	0.73409	0.215	-0.12193	0.031	0.00081	status=JK
YGL058W	RAD6		0.9497	0.098	1.01464	0.02	-0.06209	0.098	0.0003
YGL059W	PKP2		1.02715	0.099	1.11633	0.094	-0.07194	0.099	0.00024
YGL060W	YBP2		1.02085	0.029	1.03317	0.076	-0.01216	0.029	0.00026	status=JK
YGL062W	PYC1		0.93601	0.051	0.94577	0.02	-0.0148	0.051	4e-05
YGL063W	PUS2		0.9759	0.029	0.95403	0.106	-0.00778	0.029	1e-05
YGL066W	SGF73		0.76931	0.024	0.64739	0.061	0.12486	0.024	0.00031	status=JK
YGL067W	NPY1		1.0201	0.004	1.0427	0.079	-0.017	0.004	1e-05	status=JK
YGL071W	AFT1		0.97252	0.12	1.05887	0.102	-0.10101	0.12	0.00051
YGL077C	HNM1		1.00291	0.013	0.9224	0.062	0.08207	0.013	5e-05	status=JK
YGL078C	DBP3		0.85943	0.008	0.89571	0.009	-0.03974	0.008	0
YGL079W	KXD1		0.98864	0.028	0.97341	0.006	0.0165	0.028	1e-05
YGL080W	FMP37		0.93385	0.011	0.8277	0.055	0.11479	0.011	4e-05	status=JK
YGL081W	YGL081W		0.99801	0.042	1.0308	0.092	-0.00349	0.042	0.00059	status=JK
YGL082W	YGL082W		1.05075	0.046	1.07141	0.089	-0.01526	0.046	2e-05
YGL083W	SCY1		1.08491	0.017	1.08123	0.034	0.00637	0.017	0
YGL084C	GUP1		0.77806	0.025	0.98599	0.107	-0.22075	0.025	0.00034	status=JK
YGL085W	LCL3		1.00474	0.025	0.99277	0.023	0.01749	0.025	0
YGL086W	MAD1		1.01204	0.016	0.94726	0.023	0.06465	0.016	0
YGL087C	MMS2		0.99118	0.006	0.96291	0.01	0.02631	0.006	1e-05	status=JK
YGL089C	MF(ALPHA)2		1.02772	0.015	1.09277	0.029	-0.06271	0.015	0
YGL090W	LIF1		1.02759	0.053	1.0186	0.048	0.01922	0.053	4e-05
YGL094C	PAN2		0.9642	0.037	1.00911	0.018	-0.05257	0.037	2e-05
YGL096W	TOS8		0.99949	0.003	0.98635	0.05	0.02212	0.003	0	status=JK
YGL101W	YGL101W		1.02429	0.025	1.04207	0.046	-0.0056	0.025	0.0002	status=JK
YGL104C	VPS73		1.01687	0.052	0.99734	0.025	0.00994	0.052	4e-05
YGL105W	ARC1		0	0	0.02541	0.044	0	0	#NUM!	status=JK
YGL108C	YGL108C		1.027	0.005	1.11312	0.015	-0.09322	0.005	1e-05	status=JK
YGL109W	YGL109W		0.97819	0.006	0.98645	0.046	-0.01962	0.006	1e-05	status=JK
YGL110C	CUE3		0.99244	0.023	0.98034	0.037	0.02255	0.023	0
YGL114W	YGL114W		0.97269	0.044	1.01815	0.039	-0.05492	0.044	3e-05
YGL115W	SNF4		0.81214	0.068	0.70655	0.064	0.10616	0.068	0.00016
YGL117W	YGL117W		1.01658	0.03	1.0478	0.078	-0.02175	0.03	1e-05
YGL118C	YGL118C		1.04104	0.053	1.02597	0.042	0.02515	0.053	4e-05
YGL121C	GPG1		1.08384	0.026	1.07391	0.023	0.01719	0.026	0.00019	status=JK
YGL124C	MON1		0.84951	0.027	0.96423	0.025	-0.12714	0.027	0.00033	status=JK
YGL125W	MET13		1.00973	0.008	0.97938	0.012	0.03493	0.008	2e-05	status=JK
YGL126W	SCS3		0.99396	0.03	0.95097	0.076	0.02984	0.03	1e-05
YGL127C	SOH1		0.4829	0.017	0.21516	0.003	0.2664	0.017	0.00041	status=JK
YGL131C	SNT2		1.02467	0.039	1.08549	0.031	-0.06647	0.039	2e-05
YGL132W	YGL132W		1.04355	0.014	1.0017	0.039	0.03347	0.014	6e-05	status=JK
YGL133W	ITC1		1.02444	0.062	1.01136	0.063	0.01594	0.062	6e-05
YGL136C	MRM2		0.37092	0.26	0.38223	0.124	0.00715	0.26	0.06504
YGL138C	YGL138C		1.03014	0.036	1.06677	0.055	-0.03109	0.036	1e-05
YGL139W	FLC3		1.01025	0.033	1.04364	0.01	-0.03239	0.033	1e-05
YGL140C	YGL140C		0.98403	0.002	1.06727	0.027	-0.07669	0.002	0	status=JK
YGL141W	HUL5		1.00961	0.026	1.09272	0.093	-0.08483	0.026	0
YGL144C	ROG1		0.96515	0.083	1.02017	0.061	-0.04221	0.083	0.00017
YGL146C	RRT6		0.91593	0.013	0.97861	0.054	-0.0442	0.012	6e-05	status=JK
YGL147C	RPL9A		0.8605	0.018	0.96147	0.032	-0.09184	0.018	0.00015	status=JK
YGL148W	ARO2		0.94825	0.023	0.82515	0.046	0.12506	0.023	0
YGL149W	YGL149W		0.99217	0.055	1.09085	0.05	-0.09978	0.055	5e-05
YGL151W	NUT1		0.78723	0.023	0.89864	0.038	-0.10918	0.023	0.00028	status=JK
YGL152C	YGL152C		1.05626	0.072	1.03428	0.085	0.03932	0.072	9e-05
YGL153W	PEX14		1.06177	0.013	1.03331	0.006	0.02963	0.013	0
YGL154C	LYS5		0.38351	0.054	0.17279	0.014	0.2124	0.054	0.00076
YGL156W	AMS1		1.04512	0.022	1.02817	0.031	0.01873	0.022	0
YGL157W	ARI1		0.96773	0.085	1.02883	0.079	-0.06206	0.085	0.00018
YGL158W	RCK1		1.03441	0.003	0.97991	0.045	0.06081	0.003	0	status=JK
YGL159W	YGL159W		1.06439	0.036	1.0855	0.097	-0.03716	0.036	1e-05
YGL160W	AIM14		0.99914	0.073	0.90055	0.059	0.10951	0.073	0.00011
YGL161C	YIP5		1.00129	0.021	1.01202	0.039	-0.01437	0.021	0.00014	status=JK
YGL162W	SUT1		1.00701	0.019	1.00851	0.026	-0.00752	0.019	0
YGL163C	RAD54		1.03792	0.026	1.08572	0.023	-0.03778	0.026	0
YGL164C	YRB30		1.02018	0.031	1.06103	0.087	-0.068	0.031	1e-05
YGL165C	YGL165C		1.04649	0.019	1.03115	0.028	0.01712	0.019	0
YGL166W	CUP2		1.02951	0.033	1.06038	0.053	-0.01704	0.033	1e-05
YGL167C	PMR1		0.5142	0.074	0.6794	0.092	-0.14365	0.073	0.00079
YGL168W	HUR1		0.3024	0.061	0.57894	0.067	-0.27679	0.061	0.0022
YGL170C	SPO74		0.97729	0.132	0.95663	0.029	0.03338	0.132	0.00067
YGL173C	XRN1		0.28111	0.007	0.28922	0.043	-0.01141	0.007	0.00019	status=JK
YGL174W	BUD13		0.86775	0.058	0.88014	0.033	-0.01397	0.057	8e-05
YGL175C	SAE2		0.87147	0.019	1.01626	0.037	-0.14245	0.019	0.00016	status=JK
YGL176C	YGL176C		1.11373	0.008	1.07635	0.134	0.03946	0.008	2e-05	status=JK
YGL177W	YGL177W		1.18972	0.06	1.20691	0.119	0.00515	0.06	3e-05
YGL179C	TOS3		1.16703	0.055	1.05648	0.036	0.12605	0.055	3e-05
YGL180W	ATG1		0.86509	0.143	0.90822	0.041	-0.06019	0.143	0.00121
YGL181W	GTS1		0.99083	0.05	1.04805	0.034	-0.04226	0.05	4e-05
YGL194C	HOS2		0.62919	0.085	0.56188	0.054	0.06647	0.085	0.00068
YGL195W	GCN1		0.91393	0.045	0.96776	0.043	-0.0453	0.045	3e-05
YGL196W	DSD1		0.8752	0.074	1.0625	0.015	-0.17837	0.074	0.00017
YGL197W	MDS3		0.56895	0.013	0.78582	0.109	-0.19744	0.013	0.00016	status=JK
YGL198W	YIP4		0.92756	0.112	1.18869	0.016	-0.2571	0.112	0.00048
YGL199C	YGL199C		0.99659	0.066	1.01416	0.127	-0.0068	0.066	8e-05
YGL202W	ARO8		0.88799	0.131	1.06126	0.083	-0.19427	0.131	0.00086
YGL203C	KEX1		0.95215	0.081	1.03491	0.023	-0.09268	0.081	0.00017
YGL205W	POX1		0.99464	0.018	1.01571	0.046	-0.01521	0.018	0.0001	status=JK
YGL208W	SIP2		0.96611	0.016	1.03601	0.051	-0.07288	0.016	9e-05	status=JK
YGL209W	MIG2		1.00483	0.019	1.00494	0.016	-0.00096	0.019	0
YGL210W	YPT32		1.08458	0.061	1.00311	0.011	0.08669	0.061	5e-05
YGL211W	NCS6		0.91227	0.004	0.76349	0.028	0.14356	0.004	1e-05	status=JK
YGL212W	VAM7		0.84948	0.05	0.87449	0.08	-0.02267	0.05	6e-05
YGL213C	SKI8		0.99679	0.006	0.94016	0.037	0.05914	0.006	1e-05	status=JK
YGL214W	YGL214W		0.31581	0.164	0.45075	0.261	-0.09832	0.163	0.03067
YGL215W	CLG1		1.01021	0.029	0.90436	0.1	0.10136	0.029	1e-05
YGL216W	KIP3		1.02687	0.071	0.99977	0.007	0.03005	0.071	9e-05
YGL217C	YGL217C		0.96579	0.032	0.94887	0.046	0.00566	0.032	1e-05
YGL218W	YGL218W		0.83495	0.019	0.57436	0.041	0.25483	0.019	0.00017	status=JK
YGL219C	MDM34		0.83667	0.031	0.83761	0.045	0.00621	0.031	1e-05
YGL221C	NIF3		1.0158	0.013	1.02985	0.037	-0.01342	0.013	0
YGL222C	EDC1		0.95911	0.013	1.00951	0.031	-0.04645	0.013	0
YGL224C	SDT1		1.00875	0.046	1.0003	0.044	0.00595	0.045	3e-05
YGL226C-A	OST5		0.99424	0.041	1.04236	0.058	-0.04106	0.041	2e-05
YGL226W	MTC3		0.98173	0.04	0.91689	0.093	0.05633	0.04	2e-05
YGL227W	VID30		1.01336	0.004	0.9961	0.028	0.01464	0.004	0
YGL228W	SHE10		0.97427	0.034	1.05372	0.039	-0.08619	0.034	1e-05
YGL229C	SAP4		0.95181	0.05	1.05979	0.024	-0.11975	0.05	4e-05
YGL230C	YGL230C		0.99576	0.111	0.9583	0.109	0.00773	0.11	0.00037
YGL231C	EMC4		1.06379	0.051	1.06573	0.012	-0.00059	0.051	3e-05
YGL232W	TAN1		1.02912	0.039	1.02003	0.013	0.01219	0.039	2e-05
YGL234W	ADE5		1.07734	0.003	1.04281	0.033	0.02862	0.003	0
YGL235W	YGL235W		0.94911	0.033	0.83946	0.034	0.09179	0.033	1e-05
YGL236C	MTO1		0.95995	0.121	0.77508	0.077	0.18726	0.121	0.00054
YGL237C	HAP2		0.75181	0.054	0.73389	0.093	0.01223	0.054	0.0001
YGL241W	KAP114		1.0307	0.025	1.04171	0.031	-0.00967	0.025	0
YGL242C	YGL242C		0.99806	0.06	1.09781	0.031	-0.10515	0.06	6e-05
YGL243W	TAD1		0.96171	0.005	0.94346	0.037	0.02817	0.005	1e-05	status=JK
YGL244W	RTF1		0.70077	0.036	0.62248	0.095	0.05722	0.036	4e-05
YGL248W	PDE1		1.02548	0.011	1.05116	0.034	-0.02505	0.011	4e-05	status=JK
YGL249W	ZIP2		0.96342	0.009	0.93616	0.048	0.02753	0.009	0
YGL250W	RMR1		1.05849	0.004	0.96118	0.075	0.088	0.004	0	status=JK
YGL251C	HFM1		1.05077	0.027	1.03325	0.024	0.01189	0.027	0
YGL252C	RTG2		0.51117	0.087	0.36851	0.042	0.15117	0.087	0.00132
YGL253W	HXK2		0.93853	0.053	1.12392	0.064	-0.16774	0.053	5e-05
YGL254W	FZF1		1.10721	0.11	1.02022	0.126	0.09484	0.11	0.00027
YGL255W	ZRT1		0.91508	0.014	0.91038	0.051	0.01064	0.014	8e-05	status=JK
YGL256W	ADH4		1.02736	0.017	1.07155	0.068	-0.03932	0.017	9e-05	status=JK
YGL257C	MNT2		1.00514	0.031	1.01462	0.028	-0.00564	0.031	1e-05
YGL258W	VEL1		1.00726	0.06	1.01823	0.013	-0.00611	0.06	6e-05
YGL259W	YPS5		0.98833	0.02	1.0352	0.021	-0.05156	0.02	0
YGL260W	YGL260W		0.97989	0.028	0.96904	0.086	0.01278	0.028	1e-05
YGL261C	PAU11		1.05454	0.026	1.01774	0.067	0.04049	0.026	0
YGL262W	YGL262W		0.96718	0.057	0.99023	0.051	-0.026	0.057	6e-05
YGL263W	COS12		0.98006	0.046	1.00288	0.054	-0.01544	0.046	3e-05
YGR001C	YGR001C		0.98947	0.16	1.00563	0.099	-0.03516	0.16	0.00114
YGR003W	CUL3		0.9938	0.018	1.08816	0.04	-0.0856	0.018	0.0001	status=JK
YGR004W	PEX31		1.0144	0.028	1.01089	0.006	0.00228	0.028	1e-05
YGR007W	ECT1		1.02112	0.006	1.0519	0.041	-0.03135	0.006	1e-05	status=JK
YGR008C	STF2		1.02336	0.064	1.01791	0	0.00618	0.064	7e-05
YGR010W	NMA2		0.97258	0.022	0.9889	0.014	-0.01902	0.022	0.00017	status=JK
YGR011W	YGR011W		1.0246	0.008	0.97688	0.005	0.04874	0.008	2e-05	status=JK
YGR012W	YGR012W		1.02515	0.007	1.05991	0.032	-0.02829	0.007	1e-05	status=JK
YGR014W	MSB2		0.98379	0.024	1.01042	0.112	-0.0494	0.024	0
YGR015C	YGR015C		1.01636	0.077	1.06221	0.087	-0.03958	0.077	0.00012
YGR016W	YGR016W		1.01532	0.003	1.01527	0.094	0.00343	0.003	0	status=JK
YGR017W	YGR017W		1.01516	0.037	1.03991	0.064	-0.02387	0.037	1e-05
YGR018C	YGR018C		1.04009	0.017	1.08449	0.067	-0.04204	0.017	0
YGR019W	UGA1		1.10182	0.096	1.11127	0.049	-0.01089	0.096	0.00018
YGR021W	YGR021W		1.06076	0.028	1.00678	0.059	0.04309	0.028	0.00024	status=JK
YGR022C	YGR022C		0.99086	0.032	0.92769	0.024	0.05815	0.032	1e-05
YGR023W	MTL1		1.03071	0.041	0.98586	0.068	0.04019	0.041	2e-05
YGR025W	YGR025W		1.02753	0.011	0.974	0.066	0.05455	0.011	0
YGR026W	YGR026W		1.04003	0.021	0.98761	0.008	0.05492	0.021	0
YGR027C	RPS25A		0.93258	0.061	0.86438	0.067	0.05114	0.061	8e-05
YGR028W	MSP1		1.02623	0.008	1.03013	0.02	0.00806	0.008	2e-05	status=JK
YGR031W	IMO32		0.92562	0.085	0.8738	0.109	0.02985	0.085	0.00021
YGR032W	GSC2		1.04501	0.11	1.06103	0.044	-0.01665	0.11	0.00032
YGR033C	TIM21		0.97109	0.043	1.00682	0.028	-0.03024	0.043	2e-05
YGR034W	RPL26B		0.97386	0.184	1.14289	0.039	-0.15724	0.184	0.00181
YGR035C	YGR035C		0.99492	0.038	1.05961	0.071	-0.0735	0.038	2e-05
YGR037C	ACB1		0.96396	0.041	0.88882	0.031	0.0842	0.041	2e-05
YGR038W	ORM1		0.95272	0.077	0.89208	0.077	0.04847	0.077	0.00015
YGR039W	YGR039W		0.9711	0.019	1.03116	0.114	-0.08648	0.019	0.00012	status=JK
YGR040W	KSS1		1.03524	0.012	1.06407	0.055	-0.01549	0.012	4e-05	status=JK
YGR041W	BUD9		0.95122	0.038	0.98526	0.054	-0.02795	0.038	2e-05
YGR042W	YGR042W		0.97193	0.03	0.93567	0.104	0.03004	0.03	1e-05
YGR043C	NQM1		1.0074	0.046	1.02065	0.087	-0.0176	0.046	3e-05
YGR044C	RME1		1.07895	0.056	1.03696	0.017	0.03848	0.056	4e-05
YGR045C	YGR045C		1.12305	0.021	1.05815	0.035	0.06748	0.021	0
YGR049W	SCM4		1.0396	0.036	1.04068	0.057	0.00544	0.036	1e-05
YGR050C	YGR050C		1.10683	0.003	1.08352	0.059	0.0348	0.003	0
YGR051C	YGR051C		1.14824	0.092	1.14613	0.016	0.00095	0.092	0.00014
YGR052W	FMP48		1.07566	0.124	1.10847	0.071	-0.02786	0.123	0.00041
YGR053C	YGR053C		1.00791	0.07	1.01541	0.015	-0.00015	0.07	9e-05
YGR054W	YGR054W		1.0449	0.061	1.03021	0.033	0.02174	0.06	5e-05
YGR055W	MUP1		0.87871	0.044	0.92262	0.083	-0.06071	0.044	3e-05
YGR058W	PEF1		0.9987	0.017	0.97353	0.02	0.02999	0.017	0
YGR059W	SPR3		1.03549	0.036	1.024	0.04	0.01836	0.036	1e-05
YGR061C	ADE6		0.91922	0.081	1.05887	0.111	-0.12887	0.081	0.00258	status=JK
YGR066C	YGR066C		1.01104	0.013	1.01214	0.055	-0.00254	0.013	0
YGR067C	YGR067C		0.99025	0.026	1.08632	0.028	-0.09771	0.026	0
YGR068C	ART5		1.03038	0.056	1.08561	0.081	-0.04894	0.056	4e-05
YGR069W	YGR069W		1.00871	0.031	1.0289	0.051	-0.01983	0.031	1e-05
YGR070W	ROM1		1.03458	0.032	1.06575	0.037	-0.02403	0.032	1e-05
YGR071C	ENV11		1.03877	0.015	0.94305	0.042	0.09609	0.015	0
YGR072W	UPF3		0.9616	0.025	0.957	0.062	0.01939	0.025	0
YGR077C	PEX8		0.96418	0.011	0.96125	0.022	-0.00068	0.011	5e-05	status=JK
YGR078C	PAC10		0.59534	0.085	0.6856	0.026	-0.095	0.085	0.0008
YGR079W	YGR079W		0.98803	0.043	0.95984	0.04	0.02917	0.043	2e-05
YGR080W	TWF1		1.02907	0.015	1.01054	0.02	0.01737	0.015	0
YGR081C	SLX9		0.92359	0.028	0.79216	0.013	0.1309	0.028	1e-05
YGR084C	MRP13		1.04092	0.036	1.01236	0.041	0.02353	0.036	1e-05
YGR085C	RPL11B		0.90194	0.01	0.93365	0.017	-0.03151	0.01	0
YGR086C	PIL1		1.02987	0.053	1.07936	0.011	-0.04894	0.053	4e-05
YGR087C	PDC6		1.02201	0.015	1.08679	0.01	-0.06522	0.015	0
YGR088W	CTT1		0.97572	0.053	1.08494	0.072	-0.1229	0.053	5e-05
YGR089W	NNF2		1.07959	0.066	1.01835	0.079	0.0604	0.066	6e-05
YGR092W	DBF2		0.87855	0.041	0.50299	0.07	0.39208	0.041	3e-05
YGR093W	YGR093W		1.03118	0.048	0.98859	0.043	0.05392	0.048	3e-05
YGR096W	TPC1		0.92645	0.041	0.99008	0.04	-0.07249	0.041	2e-05
YGR097W	ASK10		0.93662	0.031	0.84171	0.203	0.05715	0.031	0.00035	status=JK
YGR100W	MDR1		1.03478	0.035	0.99366	0.042	0.03257	0.035	1e-05
YGR101W	PCP1		0.92838	0.061	0.90065	0.033	0.02591	0.061	8e-05
YGR105W	VMA21		0.48075	0.026	0.23764	0.094	0.22126	0.026	0.00095	status=JK
YGR106C	VOA1		1.05972	0.05	1.01941	0.03	0.04203	0.05	3e-05
YGR107W	YGR107W		1.00895	0.003	0.99815	0.073	-0.00613	0.003	0	status=JK
YGR108W	CLB1		1.06276	0.03	1.1058	0.058	-0.04439	0.03	1e-05
YGR109C	CLB6		1.02836	0.008	0.99824	0.055	0.02567	0.008	2e-05	status=JK
YGR110W	CLD1		1.01929	0.016	1.06077	0.076	-0.03223	0.016	9e-05	status=JK
YGR111W	YGR111W		0.99652	0.109	0.99862	0.108	0.01067	0.109	0.00036
YGR117C	YGR117C		1.0432	0.041	1.03149	0.037	0.0054	0.041	2e-05
YGR118W	RPS23A		0.9392	0.018	0.90043	0.07	0.05478	0.018	0.00012	status=JK
YGR121C	MEP1		0.99	0.03	0.99579	0.018	-0.00792	0.03	1e-05
YGR122C-A	YGR122C-A		0.94217	0.016	0.96844	0.093	-0.00975	0.016	9e-05	status=JK
YGR122W	YGR122W		0.99973	0.086	0.88823	0.084	0.10112	0.086	0.00018
YGR123C	PPT1		1.07821	0.027	1.08995	0.016	-0.00579	0.027	0
YGR124W	ASN2		0.97864	0.075	0.9726	0.017	-0.00146	0.075	0.00012
YGR125W	YGR125W		0.97652	0.015	0.84059	0.069	0.1238	0.015	7e-05	status=JK
YGR126W	YGR126W		0.97813	0.084	1.02572	0.019	-0.0494	0.084	0.00018
YGR127W	YGR127W		0.96084	0.029	1.00916	0.016	-0.04571	0.029	1e-05
YGR129W	SYF2		1.01513	0.03	0.99762	0.032	0.01972	0.03	1e-05
YGR130C	YGR130C		1.00525	0.035	0.96729	0.047	0.03008	0.035	1e-05
YGR131W	FHN1		0.98121	0.072	1.00327	0.102	-0.04875	0.072	0.00011
YGR132C	PHB1		0.97078	0.025	0.84242	0.043	0.12863	0.025	0
YGR133W	PEX4		0.9736	0.023	1.03867	0.055	-0.07478	0.023	0
YGR134W	CAF130		0.99766	0.007	1.01951	0.047	-0.00984	0.007	2e-05	status=JK
YGR135W	PRE9		0.91045	0.002	0.92572	0.057	-0.00946	0.002	0
YGR136W	LSB1		1.00573	0.037	1.00148	0.02	0.00814	0.037	1e-05
YGR137W	YGR137W		1.04293	0.142	1.03292	0.132	0.01411	0.142	0.00068
YGR138C	TPO2		1.01674	0.012	1.02257	0.03	-0.00447	0.012	5e-05	status=JK
YGR139W	YGR139W		1.05872	0.097	1.01677	0.127	0.06715	0.097	0.00021
YGR141W	VPS62		0.99841	0.015	1.01687	0.027	-0.01447	0.015	8e-05	status=JK
YGR142W	BTN2		0.95883	0.078	0.94622	0.006	0.0136	0.078	0.00015
YGR143W	SKN1		1.05473	0.012	0.94062	0.03	0.13149	0.012	4e-05	status=JK
YGR144W	THI4		1.00453	0.048	1.10225	0.071	-0.09518	0.048	3e-05
YGR146C	ECL1		1.1235	0.022	1.13682	0.041	-0.01284	0.022	0.00013	status=JK
YGR148C	RPL24B		0.92427	0.032	0.97702	0.034	-0.04772	0.032	1e-05
YGR149W	YGR149W		1.01155	0.072	1.07013	0.011	-0.06023	0.072	0.0001
YGR151C	YGR151C		1.081	0.007	1.08821	0.069	-0.02424	0.007	1e-05	status=JK
YGR152C	RSR1		0.95594	0.127	0.99963	0.033	-0.04613	0.127	0.00064
YGR153W	YGR153W		1.00242	0.016	0.98234	0.054	0.02404	0.016	8e-05	status=JK
YGR154C	GTO1		0.9463	0.015	0.96123	0.13	-0.0538	0.015	9e-05	status=JK
YGR157W	CHO2		0.58427	0.005	0.29667	0.032	0.291	0.005	2e-05	status=JK
YGR161C	RTS3		1.04218	0.115	1.01068	0.057	0.05056	0.114	0.00036
YGR163W	GTR2		0.73948	0.086	0.79853	0.037	-0.04564	0.086	0.00043
YGR164W	YGR164W		0.99068	0.047	0.97998	0.043	0.01687	0.046	0.00073	status=JK
YGR166W	TRS65		0.95414	0.074	1.04259	0.066	-0.09698	0.074	0.00013
YGR168C	YGR168C		1.00842	0.076	0.98572	0.086	0.04432	0.076	0.00012
YGR169C	PUS6		1.0051	0.027	1.00537	0.048	0.00936	0.027	0.00024	status=JK
YGR170W	PSD2		0.88676	0.117	0.89787	0.053	-0.00901	0.117	0.00063
YGR173W	RBG2		0.95329	0.011	0.98361	0.016	-0.02929	0.011	4e-05	status=JK
YGR174C	CBP4		0.79959	0.037	0.8573	0.054	-0.06764	0.037	3e-05
YGR176W	YGR176W		1.1076	0.028	1.02708	0.036	0.08221	0.028	0
YGR177C	ATF2		1.09633	0.051	1.04295	0.033	0.0479	0.051	3e-05
YGR178C	PBP1		0.99552	0.038	1.03262	0.014	-0.03955	0.038	2e-05
YGR181W	TIM13		0.96408	0.205	1.03912	0.055	-0.08519	0.204	0.00253
YGR182C	YGR182C		1.01838	0.022	0.92743	0.104	0.06692	0.022	0.00015	status=JK
YGR183C	QCR9		0.85638	0.016	0.8584	0.044	-0.02167	0.016	0.00011	status=JK
YGR184C	UBR1		1.03937	0.017	0.93283	0.06	0.10286	0.017	8e-05	status=JK
YGR187C	HGH1		0.92912	0.007	0.95365	0.013	-0.0251	0.007	2e-05	status=JK
YGR188C	BUB1		0.79402	0.12	0.61505	0.106	0.14504	0.119	0.00092
YGR189C	CRH1		1.05338	0.038	1.00426	0.01	0.0518	0.038	1e-05
YGR192C	TDH3		0.99934	0.051	1.02251	0.02	-0.02689	0.051	4e-05
YGR193C	PDX1		0.82672	0.129	0.93525	0.063	-0.0924	0.129	0.00102
YGR194C	XKS1		1.02467	0.045	0.99888	0.034	0.01935	0.045	2e-05
YGR196C	FYV8		0.92285	0.011	1.05578	0.058	-0.12097	0.011	5e-05	status=JK
YGR197C	SNG1		0.97439	0.018	1.00821	0.048	-0.02932	0.018	0.00012	status=JK
YGR199W	PMT6		1.09307	0.061	1.04955	0.077	0.06001	0.061	5e-05
YGR200C	ELP2		0.63509	0.104	0.79002	0.074	-0.14067	0.104	0.00117
YGR201C	YGR201C		1.06908	0.007	1.07902	0.031	-0.00279	0.007	1e-05	status=JK
YGR202C	PCT1		1.06072	0.049	1.03176	0.02	0.03241	0.049	0.00072	status=JK
YGR203W	YCH1		1.05466	0.045	1.00804	0.023	0.04724	0.045	2e-05
YGR205W	TDA10		1.04347	0.005	0.97232	0.048	0.06183	0.005	1e-05	status=JK
YGR206W	MVB12		0.81071	0.087	0.95983	0.134	-0.17486	0.087	0.00034
YGR207C	CIR1		1.03115	0.072	0.97454	0.039	0.06312	0.072	9e-05
YGR208W	SER2		0.94619	0.035	0.90919	0.029	0.03214	0.035	0.00045	status=JK
YGR209C	TRX2		1.01403	0.065	0.9966	0.047	0.02031	0.065	7e-05
YGR210C	YGR210C		0.99115	0.093	0.93653	0.068	0.07019	0.093	0.00022
YGR212W	SLI1		1.01822	0.078	0.99427	0.089	0.03425	0.078	0.00012
YGR213C	RTA1		1.02206	0.017	1.06036	0.014	-0.04598	0.017	0
YGR214W	RPS0A		0.76351	0.088	0.87254	0.037	-0.09991	0.088	0.00042
YGR217W	CCH1		1.00849	0.015	0.98938	0.027	0.02707	0.015	7e-05	status=JK
YGR221C	TOS2		1.08456	0.033	0.98466	0.035	0.0945	0.033	0.00031	status=JK
YGR223C	HSV2		1.07948	0.034	1.01685	0.046	0.06991	0.034	0.00033	status=JK
YGR224W	AZR1		0.95407	0.076	0.97516	0.093	-0.01303	0.076	0.00014
YGR225W	AMA1		0.94507	0.083	1.03991	0.047	-0.10374	0.083	0.00019
YGR226C	YGR226C		1.06709	0.003	1.07582	0.051	-0.00509	0.003	0	status=JK
YGR227W	DIE2		0.98322	0.018	1.03092	0.03	-0.04847	0.018	0.00012	status=JK
YGR228W	YGR228W		0.91693	0.006	1.00151	0.036	-0.07686	0.006	1e-05	status=JK
YGR229C	SMI1		1.05235	0.105	0.99949	0.091	0.02984	0.104	0.00027
YGR230W	BNS1		1.08417	0.024	1.03161	0.004	0.05448	0.024	0
YGR231C	PHB2		0.61037	0.076	0.54069	0.051	0.06505	0.076	0.00052
YGR232W	NAS6		1.09459	0.032	1.00371	0.056	0.0921	0.032	1e-05
YGR233C	PHO81		0.79617	0.069	1.01741	0.083	-0.21471	0.069	0.00018
YGR234W	YHB1		1.12153	0.027	1.08413	0.013	0.03921	0.027	0.0002	status=JK
YGR235C	MOS2		1.07825	0.097	1.06125	0.031	0.02223	0.097	0.0002
YGR236C	SPG1		1.05022	0.068	0.98194	0.056	0.06855	0.068	0.00139	status=JK
YGR237C	YGR237C		0.91488	0.131	0.9448	0.056	-0.02902	0.131	0.00079
YGR238C	KEL2		1.06937	0.049	1.03468	0.037	0.02848	0.049	3e-05
YGR239C	PEX21		0.96711	0.041	0.93237	0.046	0.0087	0.041	2e-05
YGR241C	YAP1802		0.9553	0.048	1.02123	0.022	-0.06981	0.048	3e-05
YGR242W	YGR242W		1.00277	0.025	1.02978	0.039	-0.02917	0.025	0
YGR243W	FMP43		1.01463	0.033	1.02413	0.057	-0.00529	0.033	1e-05
YGR244C	LSC2		1.04669	0.088	1.05454	0.108	-0.00728	0.087	0.00016
YGR247W	CPD1		1.16587	0.013	1.02927	0.091	0.1259	0.013	4e-05	status=JK
YGR248W	SOL4		0.93728	0.161	1.02173	0.005	-0.08638	0.161	0.00136
YGR249W	MGA1		1.06289	0.021	0.97439	0.013	0.09473	0.021	0.00013	status=JK
YGR250C	YGR250C		1.07705	0.001	0.90038	0.009	0.17718	0.001	0	status=JK
YGR254W	ENO1		1.05625	0.008	1.04307	0.115	0.02196	0.008	2e-05	status=JK
YGR255C	COQ6		1.00932	0.042	1.00785	0.005	0.00348	0.042	2e-05
YGR256W	GND2		1.17409	0.127	1.08874	0.021	0.09572	0.127	0.00035
YGR259C	YGR259C		0.53115	0.049	0.68371	0.038	-0.16489	0.049	0.00021
YGR260W	TNA1		0.64066	0.082	0.62234	0.07	0.00541	0.081	0.00056
YGR261C	APL6		1.07231	0.033	1.0868	0.033	-0.00852	0.033	1e-05
YGR263C	SAY1		1.16063	0.02	1.0448	0.033	0.10686	0.02	0
YGR266W	YGR266W		1.02068	0.087	1.06699	0.079	-0.06523	0.087	0.00017
YGR268C	HUA1		1.07847	0.178	0.49628	0.579	0.63136	0.178	0.00122
YGR269W	YGR269W		1.00389	0.037	0.85378	0.343	0.07614	0.037	0.00044	status=JK
YGR270W	YTA7		0.27749	0.05	0.21002	0.027	0.06873	0.05	0.00161
YGR271W	SLH1		1.00575	0.02	0.95158	0.216	0.02186	0.02	0.00013	status=JK
YGR272C	YGR272C		0.99147	0.026	0.97988	0.062	0.01115	0.026	1e-05
YGR273C	YGR273C		1.03166	0.052	1.08257	0.028	-0.05408	0.052	4e-05
YGR275W	RTT102		0.92139	0.125	0.9897	0.181	-0.12386	0.125	0.00067
YGR276C	RNH70		0.98109	0.027	0.95345	0.066	0.03869	0.027	1e-05
YGR279C	SCW4		0.65914	0.072	0.90001	0.092	-0.22521	0.072	0.00036
YGR281W	YOR1		0.9916	0.184	0.90339	0.215	0.06747	0.184	0.00171
YGR282C	BGL2		1.00958	0.08	1.0287	0.162	-0.02563	0.08	0.00013
YGR283C	YGR283C		1.00403	0.064	1.01321	0.123	-0.00911	0.064	7e-05
YGR284C	ERV29		1.12278	0.033	1.03071	0.039	0.07012	0.033	0.00029	status=JK
YGR286C	BIO2		0.94834	0.112	0.98714	0.048	-0.02677	0.112	0.00045
YGR287C	IMA1		0.94082	0.148	0.96491	0.108	-0.04617	0.148	0.00104
YGR288W	MAL13		0.91942	0.04	0.99892	0.034	-0.08329	0.04	2e-05
YGR289C	MAL11		1.03397	0.076	1.03308	0.099	0.00858	0.076	0.00011
YGR290W	YGR290W		1.0649	0.027	1.03987	0.063	0.0194	0.027	0.00021	status=JK
YGR291C	YGR291C		1.04059	0.018	1.09066	0.023	-0.05546	0.018	0
YGR292W	MAL12		1.00669	0.005	1.01693	0.029	-0.00608	0.005	1e-05	status=JK
YGR295C	COS6		1.03574	0.009	1.04197	0.017	-0.0045	0.009	3e-05	status=JK
YHL002W	HSE1		1.13415	0.053	1.06221	0.13	0.08784	0.053	0.00072	status=JK
YHL003C	LAG1		1.136	0.129	1.04109	0.023	0.10019	0.129	0.0004
YHL005C	YHL005C		1.00368	0.1	0.97131	0.038	0.02407	0.1	0.00027
YHL006C	SHU1		1.06271	0.01	1.07322	0.04	-0.00788	0.01	3e-05	status=JK
YHL007C	STE20		0.11287	0.144	0	0	0.11276	0.144	0.21486
YHL008C	YHL008C		1.07715	0.066	0.97341	0.143	0.07898	0.066	6e-05
YHL009C	YAP3		1.10647	0.006	1.02911	0.054	0.0768	0.006	1e-05	status=JK
YHL010C	ETP1		1.01714	0.054	1.06426	0.017	-0.05214	0.054	4e-05
YHL012W	YHL012W		1.06678	0.013	1.04453	0.029	0.01662	0.013	0
YHL013C	OTU2		1.05177	0.005	1.08786	0.107	-0.0059	0.005	1e-05	status=JK
YHL014C	YLF2		1.07371	0.013	1.05876	0.054	0.01043	0.013	5e-05	status=JK
YHL016C	DUR3		1.02903	0.074	1.00904	0.086	0.03033	0.074	0.0001
YHL017W	YHL017W		1.03719	0.007	0.99724	0.027	0.039	0.007	1e-05	status=JK
YHL019C	APM2		0.97881	0.012	0.97794	0.035	-0.00685	0.012	5e-05	status=JK
YHL020C	OPI1		0.59959	0.018	0.54916	0.075	0.04921	0.018	0.00031	status=JK
YHL021C	AIM17		1.02862	0.031	1.0625	0.133	0.00382	0.031	1e-05
YHL022C	SPO11		1.06054	0.071	1.02976	0.054	0.01701	0.071	8e-05
YHL023C	NPR3		0.72724	0.125	0.65016	0.046	0.0713	0.125	0.00138
YHL024W	RIM4		1.01661	0.003	1.05501	0.037	-0.03837	0.003	0	status=JK
YHL025W	SNF6		1.19786	0.06	1.04848	0.017	0.14905	0.06	3e-05
YHL026C	YHL026C		0.99465	0.142	1.00982	0.021	-0.02168	0.142	0.00079
YHL027W	RIM101		0.60684	0.093	0.80732	0.087	-0.18978	0.093	0.00098
YHL028W	WSC4		1.0379	0.07	1.00674	0.021	0.03124	0.07	8e-05
YHL029C	OCA5		0.77987	0.047	1.00474	0.028	-0.22749	0.047	6e-05
YHL030W	ECM29		1.17379	0.064	1.19009	0.139	0.02628	0.064	4e-05
YHL031C	GOS1		0.76651	0.049	0.68807	0.017	0.08021	0.049	7e-05
YHL032C	GUT1		0.98784	0.09	1.06486	0.033	-0.07598	0.09	0.0002
YHL033C	RPL8A		0.72004	0.064	0.92373	0.099	-0.21859	0.064	0.00019
YHL034C	SBP1		0.9405	0.061	0.94817	0.146	-0.03333	0.061	8e-05
YHL035C	VMR1		1.05746	0.03	1.02185	0.069	0.03093	0.03	1e-05
YHL036W	MUP3		1.07166	0.044	1.06688	0.052	0.00095	0.044	2e-05
YHL037C	YHL037C		0.95503	0.135	0.99071	0.053	-0.02884	0.134	0.00076
YHL039W	EFM1		0.9651	0.028	0.97027	0.021	0.00413	0.028	0.00029	status=JK
YHL040C	ARN1		1.09221	0.054	1.03682	0.075	0.04442	0.054	3e-05
YHL041W	YHL041W		0.97866	0.047	1.00394	0.025	-0.01959	0.047	3e-05
YHL042W	YHL042W		0.99677	0.102	0.9848	0.015	0.01508	0.102	0.0003
YHL043W	ECM34		1.03851	0.065	1.02573	0.013	0.01143	0.065	7e-05
YHL044W	YHL044W		1.02812	0.1	1.04278	0.115	-0.00688	0.1	0.00025
YHL045W	YHL045W		1.03195	0.128	1.05509	0.016	-0.03117	0.127	0.00051
YHL046C	PAU13		1.09656	0.014	1.00984	0.028	0.07535	0.014	6e-05	status=JK
YHL047C	ARN2		1.06952	0.027	1.06174	0.064	0.02206	0.027	0
YHR001W-A	QCR10		1.0622	0.048	1.02351	0.039	0.05084	0.048	3e-05
YHR003C	YHR003C		0.80882	0.088	0.94251	0.089	-0.15597	0.088	0.00035
YHR004C	NEM1		0.88516	0.173	0.82333	0.091	0.04985	0.173	0.00198
YHR005C	GPA1		0	0	0	0	0	0	#NUM!
YHR006W	STP2		1.0804	0.018	1.00975	0.034	0.06035	0.018	0.0001	status=JK
YHR008C	SOD2		1.05002	0.047	1.00333	0.042	0.04302	0.047	2e-05
YHR009C	TDA3		0.94116	0.107	0.90685	0.093	0.02658	0.107	0.0004
YHR012W	VPS29		0.76164	0.105	0.8361	0.036	-0.07254	0.105	0.00071
YHR014W	SPO13		0.93932	0.043	0.84845	0.114	0.06415	0.043	3e-05
YHR015W	MIP6		0.99261	0.039	1.01082	0.052	-0.01331	0.039	2e-05
YHR016C	YSC84		1.00186	0.042	1.02565	0.061	-0.01408	0.041	2e-05
YHR017W	YSC83		0.86906	0.163	1.00798	0.091	-0.16128	0.163	0.00177
YHR018C	ARG4		0.22079	0.023	0.14041	0.005	0.0816	0.023	0.00032
YHR021C	RPS27B		0.45136	0.034	0.46982	0.062	-0.00871	0.034	0.00012
YHR021W-A	ECM12		0.88617	0.032	1.00508	0.036	-0.11872	0.032	0.00042	status=JK
YHR022C	YHR022C		0.95159	0.199	0.877	0.223	0.02936	0.199	0.00243
YHR025W	THR1		0.24893	0.026	0.56778	0.083	-0.30678	0.026	0.00031
YHR028C	DAP2		0.91702	0.114	1.03319	0.034	-0.11197	0.114	0.00052
YHR029C	YHI9		0.98878	0.127	1.01287	0.009	-0.02588	0.127	0.00058
YHR030C	SLT2		0.46791	0.039	0.93406	0.017	-0.46167	0.039	0.00016
YHR031C	RRM3		0.97412	0.052	1.18377	0.076	-0.19446	0.052	4e-05
YHR032W	ERC1		0.97912	0.042	0.98419	0.086	-0.00275	0.042	0.0006	status=JK
YHR033W	YHR033W		0.92727	0.194	1.0471	0.066	-0.10978	0.193	0.00241
YHR034C	PIH1		0.74607	0.075	0.99499	0.053	-0.24365	0.075	0.00028
YHR035W	YHR035W		1.0683	0.101	0.98601	0.125	0.06982	0.101	0.00023
YHR037W	PUT2		1.00356	0.1	0.91213	0.264	0.05911	0.1	0.00027
YHR039C	MSC7		0.74152	0.094	0.87574	0.11	-0.11362	0.094	0.00055
YHR041C	SRB2		0.142	0.016	0.12993	0.008	0.0145	0.016	0.00037
YHR043C	DOG2		1.0116	0.056	1.09939	0.05	-0.06154	0.056	5e-05
YHR044C	DOG1		1.09274	0.079	0.90372	0.272	0.17618	0.079	0.0001
YHR045W	YHR045W		0.83349	0.211	0.99286	0.147	-0.1673	0.21	0.0042
YHR046C	INM1		0.9069	0.202	0.99128	0.088	-0.09452	0.202	0.00293
YHR047C	AAP1		0.9331	0.01	1.02061	0.137	-0.07196	0.01	4e-05	status=JK
YHR048W	YHK8		0.90297	0.011	0.90908	0.034	-0.00244	0.011	5e-05	status=JK
YHR049C-A	YHR049C-A		1.00231	0.075	0.98778	0.033	0.01518	0.075	0.00011
YHR049W	FSH1		1.04258	0.052	0.99676	0.024	0.0457	0.052	3e-05
YHR050W	SMF2		0.92545	0.024	0.82285	0.108	0.09659	0.024	0.00022	status=JK
YHR057C	CPR2		1.16157	0.074	0.99255	0.058	0.1818	0.074	7e-05
YHR059W	FYV4		0	0	0.10602	0.131	-0.07689	0	#NUM!	status=JK
YHR061C	GIC1		0.49465	0.231	0.27363	0.036	0.20938	0.231	0.02335
YHR066W	SSF1		0.65588	0.059	0.92885	0.044	-0.28066	0.059	0.0002
YHR067W	HTD2		0.50082	0.073	0.65476	0.076	-0.15079	0.073	0.00083
YHR073W	OSH3		0.95873	0.017	1.03886	0.058	-0.07399	0.017	0.00011	status=JK
YHR075C	PPE1		0.84231	0.063	1.05015	0.044	-0.22106	0.062	0.00011
YHR076W	PTC7		0.86566	0.09	1.00562	0.054	-0.13482	0.09	0.00031
YHR077C	NMD2		0.93523	0.08	0.96882	0.026	-0.03588	0.08	0.00017
YHR078W	YHR078W		1.08593	0.007	1.00055	0.022	0.09059	0.007	1e-05	status=JK
YHR079C	IRE1		1.03316	0.046	0.99157	0.053	0.02882	0.046	2e-05
YHR079C-B	YHR079C-B		1.05626	0.044	1.05387	0.016	-0.00235	0.044	2e-05
YHR080C	YHR080C		1.05617	0.006	1.05954	0.057	0.00319	0.006	1e-05	status=JK
YHR081W	LRP1		0.44003	0.017	0.35258	0.03	0.08757	0.017	2e-05
YHR082C	KSP1		1.02071	0.042	1.03003	0.016	-0.01259	0.042	2e-05
YHR086W	NAM8		1.07518	0.06	0.9659	0.13	0.11556	0.06	5e-05
YHR087W	RTC3		0.95925	0.13	1.03525	0.107	-0.11228	0.13	0.00068
YHR092C	HXT4		1.05786	0.021	1.01878	0.054	0.05094	0.021	0.00013	status=JK
YHR093W	YHR093W		0.93603	0.034	1.01345	0.027	-0.08116	0.034	1e-05
YHR094C	HXT1		1.02268	0.036	1.03987	0.06	-0.02716	0.036	1e-05
YHR095W	YHR095W		1.04946	0.008	1.0065	0.081	0.04168	0.008	2e-05	status=JK
YHR096C	HXT5		1.04976	0.1	0.99504	0.101	0.07695	0.1	0.00024
YHR097C	YHR097C		0.86399	0.12	0.9563	0.062	-0.09649	0.12	0.00073
YHR103W	SBE22		1.02836	0.06	1.00194	0.042	0.03081	0.06	5e-05
YHR104W	GRE3		1.10289	0.038	1.03527	0.046	0.06285	0.038	0.00041	status=JK
YHR105W	YPT35		1.03021	0.053	0.97951	0.054	0.05059	0.053	4e-05
YHR106W	TRR2		1.04468	0.058	1.01971	0.073	0.04131	0.058	5e-05
YHR108W	GGA2		0.9486	0.011	0.97587	0.04	-0.01869	0.011	4e-05	status=JK
YHR109W	CTM1		1.05967	0.008	0.99976	0.05	0.06029	0.008	2e-05	status=JK
YHR110W	ERP5		1.11938	0.036	1.07147	0.007	0.05111	0.035	1e-05
YHR111W	UBA4		0.79388	0.046	0.77398	0.047	0.02546	0.046	5e-05
YHR112C	YHR112C		1.02802	0.031	1.06141	0.027	-0.02949	0.031	1e-05
YHR113W	APE4		0.88366	0.057	1.04053	0.022	-0.14671	0.057	7e-05
YHR114W	BZZ1		1.07456	0.076	1.06704	0.111	0.01254	0.076	0.0001
YHR115C	DMA1		0.9194	0.095	1.04025	0.016	-0.11647	0.095	0.0003
YHR116W	COX23		0.57072	0.08	0.67685	0.079	-0.11329	0.08	0.00074
YHR117W	TOM71		1.0006	0.002	1.01623	0.041	-0.02306	0.002	0	status=JK
YHR121W	LSM12		1.05396	0.012	1.02558	0.023	0.02898	0.012	4e-05	status=JK
YHR123W	EPT1		1.03566	0.028	0.91193	0.086	0.10929	0.028	1e-05
YHR124W	NDT80		1.00893	0.008	1.0216	0.05	-0.01663	0.008	0
YHR125W	YHR125W		0.96024	0.049	1.03534	0.019	-0.07094	0.049	4e-05
YHR126C	ANS1		0.94404	0.026	1.02158	0.045	-0.08146	0.026	0.00025	status=JK
YHR127W	YHR127W		0.70764	0.096	0.98887	0.068	-0.27702	0.096	0.00068
YHR129C	ARP1		0.69686	0.023	0.78733	0.202	-0.03426	0.023	0.00037	status=JK
YHR130C	YHR130C		1.05302	0.015	1.06523	0.106	0.00938	0.015	7e-05	status=JK
YHR131C	YHR131C		0.86897	0.129	1.00529	0.024	-0.14238	0.129	0.00089
YHR132C	ECM14		0.90274	0.055	0.99689	0.037	-0.09323	0.055	6e-05
YHR132W-A	IGO2		1.05723	0.049	1.00974	0.023	0.04751	0.049	3e-05
YHR133C	NSG1		0.91188	0.038	0.99379	0.03	-0.0932	0.038	0.00057	status=JK
YHR134W	WSS1		0.79282	0.092	0.90551	0.001	-0.11236	0.092	0.00042
YHR135C	YCK1		1.03883	0.008	0.96811	0.004	0.07033	0.008	2e-05	status=JK
YHR136C	SPL2		1.01678	0.023	1.02776	0.056	-0.01777	0.023	0
YHR137W	ARO9		1.08843	0.056	1.0792	0.023	0.02113	0.056	4e-05
YHR138C	YHR138C		1.15163	0.032	1.12394	0.014	0.02109	0.032	0.00026	status=JK
YHR139C	SPS100		1.0613	0.062	0.96209	0.003	0.10083	0.062	6e-05
YHR139C-A	YHR139C-A		1.02502	0.094	1.042	0.037	-0.01056	0.094	0.00021
YHR140W	YHR140W		1.0569	0.136	1.05143	0.035	0.01315	0.136	0.00058
YHR142W	CHS7		0.92228	0.193	0.95267	0.05	-0.033	0.193	0.00243
YHR143W	DSE2		1.00976	0.063	0.97797	0.018	0.03392	0.063	7e-05
YHR146W	CRP1		1.27174	0.052	1.06069	0.049	0.2041	0.052	2e-05
YHR150W	PEX28		1.11435	0.063	1.03478	0.056	0.08955	0.063	5e-05
YHR151C	MTC6		1.04226	0.071	1.02375	0.015	0.01228	0.07	9e-05
YHR152W	SPO12		1.04924	0.11	1.0324	0.031	0.01101	0.11	0.00031
YHR153C	SPO16		1.07006	0.024	0.64548	0.536	0.32318	0.024	0.00017	status=JK
YHR154W	RTT107		0.83679	0.079	1.00838	0.119	-0.19404	0.079	0.00023
YHR155W	YSP1		1.06023	0.119	1.07623	0.165	-0.03666	0.119	0.00039
YHR156C	LIN1		1.01129	0.19	0.78835	0.079	0.2092	0.189	0.00176
YHR157W	REC104		1.17243	0.044	1.07046	0.058	0.08165	0.044	0.00046	status=JK
YHR158C	KEL1		0.97013	0.101	1.00475	0.066	-0.07197	0.101	0.0003
YHR159W	TDA11		0.95377	0.255	0.99035	0.051	-0.03539	0.254	0.00493
YHR160C	PEX18		1.22967	0.061	1.06183	0.016	0.16331	0.061	0.00083	status=JK
YHR161C	YAP1801		1.20579	0.107	1.09623	0.18	0.0517	0.107	0.00019
YHR162W	MPC2		0.75823	0.031	0.88671	0.004	-0.12757	0.031	2e-05
YHR163W	SOL3		0.95296	0.012	0.97059	0.069	-0.03392	0.012	5e-05	status=JK
YHR167W	THP2		1.06168	0.067	0.99441	0.032	0.05809	0.067	7e-05
YHR171W	ATG7		1.07738	0.059	0.98805	0.042	0.09644	0.059	4e-05
YHR176W	FMO1		1.14694	0.052	1.06953	0.079	0.07456	0.052	3e-05
YHR178W	STB5		0.58052	0.07	0.51374	0.094	0.07643	0.07	0.00048
YHR179W	OYE2		1.16846	0.109	1.07633	0.068	0.11033	0.109	0.00022
YHR180W	YHR180W		0.98391	0.04	1.10938	0.068	-0.1239	0.04	2e-05
YHR181W	SVP26		1.15775	0.061	1.13407	0.089	0.03285	0.061	4e-05
YHR182W	YHR182W		1.13732	0.14	1.07151	0.108	0.05085	0.14	0.00051
YHR184W	SSP1		1.04842	0.101	1.06382	0.047	-0.01641	0.101	0.00025
YHR185C	PFS1		1.11137	0.015	1.02934	0.017	0.08415	0.015	6e-05	status=JK
YHR189W	PTH1		0.98643	0.06	0.81309	0.064	0.15776	0.06	6e-05
YHR191C	CTF8		0.72766	0.079	0.91677	0.084	-0.18001	0.079	0.00034
YHR193C	EGD2		0	0	0	0	0	0	#NUM!	status=JK
YHR194W	MDM31		0.15622	0.137	0.1784	0.036	-0.00254	0.137	0.10663
YHR195W	NVJ1		1.07198	0.043	1.00582	0.021	0.06713	0.043	2e-05
YHR198C	AIM18		0.81337	0.117	0.87428	0.011	-0.05557	0.117	0.00081
YHR199C	AIM46		1.05597	0.011	1.00978	0.031	0.0394	0.011	3e-05	status=JK
YHR200W	RPN10		0.62283	0.062	0.84853	0.07	-0.20776	0.062	0.00027
YHR202W	YHR202W		0.852	0.019	0.93229	0.058	-0.07659	0.019	0.00016	status=JK
YHR203C	RPS4B		0.54617	0.013	0.77156	0.152	-0.23103	0.013	0.0002	status=JK
YHR204W	MNL1		1.01763	0.038	1.06444	0.048	-0.03527	0.038	1e-05
YHR206W	SKN7		0.99489	0.016	0.98128	0.015	0.01386	0.016	0
YHR207C	SET5		0.99548	0.059	1.02542	0.023	-0.03533	0.059	6e-05
YHR209W	CRG1		1.0348	0.025	1.02643	0.032	0.0115	0.025	0
YHR210C	YHR210C		1.06337	0.019	1.06293	0.015	0.00716	0.019	0.0001	status=JK
YIL001W	YIL001W		0.96629	0.01	1.03013	0.008	-0.06694	0.01	4e-05	status=JK
YIL002C	INP51		0.97659	0.036	0.98587	0	-0.00921	0.036	1e-05
YIL005W	EPS1		1.02168	0.088	0.99805	0.048	0.01446	0.088	0.00017
YIL006W	YIA6		0.99602	0.042	0.96584	0.037	0.02684	0.042	2e-05
YIL007C	NAS2		1.01523	0.094	0.98568	0.058	0.02933	0.094	0.00022
YIL008W	URM1		0.66738	0.063	0.71852	0.05	-0.04953	0.063	0.00024
YIL009C-A	EST3		0.86397	0.21	0.98772	0.063	-0.10832	0.21	0.00377
YIL010W	DOT5		1.00023	0.09	1.01097	0.014	-0.00857	0.09	0.0002
YIL011W	TIR3		0.07551	0.108	0.10599	0.184	0.07543	0.108	0.25677
YIL012W	YIL012W		1.07783	0.062	1.02053	0.049	0.04219	0.062	0.00111	status=JK
YIL013C	PDR11		0.96585	0.044	0.96992	0.085	0.00801	0.044	3e-05
YIL014W	MNT3		1.00084	0.027	1.00172	0.033	-0.00721	0.027	0.00025	status=JK
YIL015C-A	YIL015C-A		1.01886	0.07	1.00791	0.006	0.01136	0.07	9e-05
YIL015W	BAR1		0.96314	0.096	0.99585	0.039	-0.02627	0.096	0.00027
YIL016W	SNL1		1.0904	0.084	0.99351	0.035	0.10557	0.084	0.00013
YIL017C	VID28		1.04124	0.06	1.10264	0.036	-0.04961	0.059	0.00109	status=JK
YIL020C	HIS6		0.22665	0.06	0.12556	0.014	0.09908	0.06	0.0049
YIL023C	YKE4		1.00546	0.029	1.03452	0.028	-0.02904	0.029	1e-05
YIL024C	YIL024C		1.03747	0.024	1.04646	0.017	-0.01275	0.024	0
YIL025C	YIL025C		0.99909	0.051	0.98894	0.032	0.00578	0.051	4e-05
YIL027C	EMC5		1.02689	0.034	1.00793	0.081	0.03729	0.034	1e-05
YIL028W	YIL028W		1.03608	0.03	0.96568	0.011	0.07041	0.03	1e-05
YIL029C	YIL029C		1.02217	0.087	1.08421	0.031	-0.06382	0.087	0.00017
YIL030C	SSM4		1.04215	0.02	0.94348	0.029	0.09949	0.019	0.00012	status=JK
YIL032C	YIL032C		1.01765	0.01	0.98967	0.069	0.04108	0.01	3e-05	status=JK
YIL034C	CAP2		1.02775	0.046	1.01568	0.034	0.00731	0.046	2e-05
YIL035C	CKA1		0.89064	0.196	1.06306	0.069	-0.17634	0.195	0.0028
YIL036W	CST6		0.98219	0.038	0.92886	0.048	0.04792	0.038	2e-05
YIL037C	PRM2		0.98531	0.047	1.01706	0.024	-0.03445	0.047	3e-05
YIL038C	NOT3		0.98157	0.014	1.01416	0.058	-0.04457	0.014	0
YIL039W	TED1		0.99426	0.045	1.02098	0.036	-0.03422	0.045	2e-05
YIL040W	APQ12		0.26364	0.05	0.32764	0.028	-0.05079	0.05	0.00187
YIL041W	GVP36		1.0128	0.261	1.05887	0.078	-0.06107	0.261	0.00446
YIL042C	PKP1		0.95063	0.031	1.09174	0.055	-0.12813	0.031	0.00036	status=JK
YIL043C	CBR1		1.08945	0.027	0.99237	0.04	0.07884	0.027	0.0002	status=JK
YIL044C	AGE2		0.83129	0.016	0.93012	0.016	-0.09971	0.016	0.00012	status=JK
YIL045W	PIG2		1.08989	0.065	1.00693	0.036	0.07583	0.065	6e-05
YIL047C	SYG1		1.10326	0.028	0.94651	0.11	0.16456	0.028	0
YIL049W	DFG10		1.06663	0.038	0.98981	0.065	0.05919	0.038	1e-05
YIL050W	PCL7		1.11281	0.068	1.03988	0.036	0.0923	0.068	6e-05
YIL052C	RPL34B		0.9904	0.091	0.96523	0.019	0.02477	0.091	0.00022
YIL053W	RHR2		0.93146	0.013	1.00198	0.065	-0.08351	0.013	6e-05	status=JK
YIL054W	YIL054W		0.93585	0.005	1.02201	0.066	-0.0846	0.005	1e-05	status=JK
YIL055C	YIL055C		1.01744	0.158	0.75489	0.215	0.31789	0.158	0.00101
YIL056W	VHR1		0.81954	0.045	0.87447	0.048	-0.06591	0.045	4e-05
YIL057C	RGI2		0.78634	0.032	0.92437	0.165	-0.14739	0.032	0.00055	status=JK
YIL058W	YIL058W		0.9824	0.055	1.06932	0.035	-0.10037	0.055	5e-05
YIL059C	YIL059C		0.86739	0.034	0.94371	0.009	-0.07427	0.034	0.00051	status=JK
YIL060W	YIL060W		0.91893	0.058	0.95987	0.134	-0.03215	0.057	7e-05
YIL064W	SEE1		0.9908	0.059	1.04243	0.199	-0.0706	0.059	6e-05
YIL065C	FIS1		1.00879	0.011	0.97263	0.051	0.02824	0.011	4e-05	status=JK
YIL066C	RNR3		1.02233	0.034	1.03579	0.035	-0.02131	0.034	1e-05
YIL067C	YIL067C		0.96515	0.042	0.99948	0.006	-0.03162	0.042	2e-05
YIL070C	MAM33		0.99307	0.039	0.97812	0.006	0.01413	0.039	2e-05
YIL071C	PCI8		0.95561	0.035	0.93342	0.01	0.02314	0.035	1e-05
YIL072W	HOP1		1.02503	0.055	1.02722	0.027	0.00635	0.055	4e-05
YIL073C	SPO22		1.06987	0.065	0.97863	0.023	0.10444	0.065	6e-05
YIL074C	SER33		1.03861	0.017	1.02786	0.053	0.02774	0.017	0
YIL076W	SEC28		0.89986	0.018	0.73174	0.011	0.17238	0.018	0
YIL077C	YIL077C		1.02595	0.035	0.96538	0.093	0.06913	0.035	1e-05
YIL079C	AIR1		1.01927	0.025	1.05131	0.068	-0.02078	0.025	0.0002	status=JK
YIL084C	SDS3		0.80926	0.062	0.47295	0.047	0.34173	0.062	0.00012
YIL085C	KTR7		0.9702	0.067	0.96218	0.085	-0.00109	0.067	9e-05
YIL086C	YIL086C		1.02724	0.025	0.99435	0.048	0.03415	0.024	0
YIL087C	AIM19		1.01207	0.019	1.01005	0.035	0.01102	0.019	0
YIL088C	AVT7		1.00121	0.049	1.03276	0.025	-0.02641	0.049	3e-05
YIL089W	YIL089W		1.03457	0.058	1.02287	0.02	0.02265	0.058	5e-05
YIL090W	ICE2		0.75836	0.082	0.52975	0.03	0.22179	0.082	0.00035
YIL092W	YIL092W		0.98201	0.015	0.95588	0.021	0.01782	0.015	8e-05	status=JK
YIL093C	RSM25		0.9945	0.039	1.02264	0.053	-0.03288	0.039	2e-05
YIL094C	LYS12		0.50093	0.043	0.16418	0.009	0.33254	0.043	0.00248	status=JK
YIL095W	PRK1		0.99663	0.007	1.05875	0.007	-0.05959	0.007	2e-05	status=JK
YIL096C	YIL096C		0.90214	0.049	1.03193	0.098	-0.10984	0.049	0.00097	status=JK
YIL097W	FYV10		1.0401	0.077	0.97574	0.08	0.05256	0.077	0.00011
YIL098C	FMC1		1.01321	0.007	1.01208	0.038	-0.00591	0.007	2e-05	status=JK
YIL099W	SGA1		1.00375	0.025	1.02673	0.026	-0.02019	0.025	0
YIL100W	YIL100W		0.98668	0.009	1.05457	0.026	-0.07522	0.009	0
YIL101C	XBP1		1.02126	0.033	1.08819	0.015	-0.07126	0.033	1e-05
YIL102C	YIL102C		1.00975	0.04	1.04494	0.008	-0.0336	0.04	2e-05
YIL103W	DPH1		0.9845	0.021	0.9853	0.039	-0.00352	0.021	0
YIL105C	SLM1		0.97758	0.036	1.02035	0.009	-0.04495	0.035	1e-05
YIL107C	PFK26		0.99471	0.012	0.97943	0.044	0.01486	0.012	5e-05	status=JK
YIL108W	YIL108W		1.00867	0.03	1.00445	0.007	0.0058	0.03	1e-05
YIL110W	HPM1		0.85626	0.023	0.92048	0.03	-0.05179	0.022	1e-05
YIL111W	COX5B		1.04597	0.003	0.99737	0.02	0.04979	0.003	0	status=JK
YIL112W	HOS4		0.92785	0.158	0.96739	0.129	-0.02935	0.158	0.00133
YIL113W	SDP1		0.98207	0.086	0.97019	0.029	0.01748	0.086	0.00019
YIL114C	POR2		1.00192	0.031	0.99339	0.067	0.00593	0.031	1e-05
YIL116W	HIS5		0.60154	0.089	0.15869	0.024	0.43475	0.089	0.00088
YIL117C	PRM5		0.97372	0.007	1.01625	0.022	-0.04799	0.007	2e-05	status=JK
YIL119C	RPI1		1.01397	0.058	0.99085	0.042	0.0203	0.058	5e-05
YIL120W	QDR1		0.99817	0.011	1.01255	0.013	-0.01391	0.011	4e-05	status=JK
YIL122W	POG1		0.89695	0.039	0.98862	0.03	-0.08419	0.039	2e-05
YIL123W	SIM1		0.99692	0.02	0.97554	0.061	0.01364	0.02	0
YIL124W	AYR1		1.01051	0.049	1.01881	0.077	-0.02605	0.049	3e-05
YIL125W	KGD1		0	0	0.00115	0.002	0	0	#NUM!
YIL128W	MET18		0.7806	0.018	0.68205	0.024	0.10241	0.018	0.00017	status=JK
YIL130W	ASG1		1.02733	0.031	0.97417	0.022	0.04535	0.031	1e-05
YIL131C	FKH1		1.03383	0.04	1.05189	0.034	-0.02236	0.04	2e-05
YIL132C	CSM2		0.99158	0.073	0.9808	0.095	-0.00249	0.073	0.00011
YIL133C	RPL16A		0.94703	0.028	0.92848	0.052	-0.00782	0.028	1e-05
YIL134W	FLX1		0.90829	0.005	0.41692	0.014	0.48558	0.005	1e-05	status=JK
YIL135C	VHS2		1.0366	0.027	1.05279	0.025	-0.00699	0.027	0
YIL136W	OM45		0.99563	0.01	1.01824	0.007	-0.02581	0.01	0
YIL137C	TMA108		1.0382	0.035	0.91676	0.108	0.14186	0.035	1e-05
YIL138C	TPM2		0.99996	0.025	1.01098	0.008	-0.00596	0.025	0
YIL139C	REV7		0.99559	0.018	0.9634	0.06	0.02367	0.018	0.00011	status=JK
YIL140W	AXL2		1.04467	0.041	1.10119	0.04	-0.05407	0.041	2e-05
YIL141W	YIL141W		1.04721	0.008	1.09033	0.033	-0.05108	0.008	2e-05	status=JK
YIL145C	PAN6		1.04026	0.027	1.01914	0.076	0.02416	0.027	0.00023	status=JK
YIL146C	ATG32		0.98363	0.064	1.01624	0.072	-0.02751	0.063	7e-05
YIL148W	RPL40A		1.01478	0.033	0.98963	0.075	0.04289	0.033	1e-05
YIL149C	MLP2		1.02536	0.019	1.0069	0.012	0.02002	0.019	0
YIL151C	YIL151C		0.97076	0.023	0.94741	0.035	0.01989	0.023	0
YIL152W	YIL152W		1.06136	0.027	1.04406	0.038	0.01701	0.027	0
YIL153W	RRD1		0.98869	0.015	1.06559	0.025	-0.07766	0.015	0
YIL154C	IMP2'		0.9048	0.011	1.06976	0.016	-0.16196	0.011	5e-05	status=JK
YIL155C	GUT2		0.98605	0.006	0.94197	0.068	0.03659	0.006	1e-05	status=JK
YIL156W	UBP7		0.99703	0.029	1.10818	0.036	-0.11525	0.029	1e-05
YIL157C	COA1		1.0085	0.031	1.01	0.021	0.01029	0.031	1e-05
YIL158W	AIM20		0.98873	0.007	1.02498	0.079	-0.04008	0.007	2e-05	status=JK
YIL159W	BNR1		0.90352	0.076	0.9492	0.174	-0.08017	0.076	0.00016
[truncated: 2,323 more rows]

## Sheet: DMA LU Rep2
Array ORF	Array Name	Array annotation	Normalized colony size (EXPERIMENT)	Normalized colony std. dev. (EXPERIMENT)	Normalized colony size (CONTROL)	Normalized colony std. dev. (CONTROL)	Score	Score stdev	p-Value	Additional information
YAL002W	VPS8		0.62634	0.093	1.0793	0.046	-0.45189	0.092	0.00087
YAL004W	YAL004W		0.93607	0.14	1.02718	0.099	-0.1042	0.14	0.0009
YAL005C	SSA1		0.99421	0.009	0.99415	0.034	-4e-05	0.009	3e-05	status=JK
YAL007C	ERP2		1.00082	0.071	0.98744	0.057	0.02248	0.071	0.0001
YAL008W	FUN14		1.08464	0.054	1.06581	0.069	0.02572	0.053	3e-05
YAL010C	MDM10		0.90904	0.072	0.79906	0.075	0.11206	0.072	0.00014
YAL011W	SWC3		1.07722	0.026	1.03871	0.048	0.04706	0.026	0
YAL013W	DEP1		0.82391	0.112	0.78795	0.063	0.02338	0.112	0.00068
YAL014C	SYN8		1.13134	0.092	1.13755	0.045	-0.01722	0.092	0.00015
[truncated: 4,313 more rows]

## Sheet: TSv6 U Rep1
Array ORF	Array Name	Array annotation	Normalized colony size (EXPERIMENT)	Normalized colony std. dev. (EXPERIMENT)	Normalized colony size (CONTROL)	Normalized colony std. dev. (CONTROL)	Score	Score stdev	p-Value	Additional information
[truncated: 1,227 more rows]

[truncated: 3 more sheets: TSv6 U Rep2, TSv6 LU Rep1, TSv6 LU Rep2]
