# Supplementary material for: Genetic profiling of protein burden and nuclear export overload
Source: eLife journal article supplement (doi:10.7554/elife.54080), 2020-11-04
Supplement: supp [file elife-54080-supp-v1.zip › elife_poa_e54080_Figure_2_source_data_2.xlsx]

## Sheet: GFPop_positive_negative
Array ORF	Array Name	Array annotation	GFP
YJL085W	EXO70	exo70-29/37	-0.7106
YGL073W	HSF1	hsf1-848	-0.6134
YMR117C	SPC24	spc24-9	-0.5877
YLR190W	MMR1	DMA	-0.5369
YPR183W	DPM1	dpm1-6	-0.5048
YGR002C	SWC4	swc4-4	-0.4738
YDR238C	SEC26	sec26-f856aw860a	-0.463
YAL002W	VPS8	DMA	-0.4453
YGR113W	DAM1	dam1-19	-0.4437
YNR003C	RPC34	rpc34-1	-0.4065
YDL105W	NSE4	nse4-ts2	-0.4007
YOL123W	HRP1	hrp1-1	-0.3925
YJR042W	NUP85	yjr042w-ph	-0.3855
YDR331W	GPI8	ydr331w-ph	-0.3796
YHR030C	SLT2	DMA	-0.3578
YAR018C	KIN3	DMA	-0.3484
YGL233W	SEC15	sec15-1	-0.3484
YBL016W	FUS3	DMA	-0.344
YMR198W	CIK1	DMA	-0.3422
YOR057W	SGT1	sgt1-5	-0.3388
YDR311W	TFB1	tfb1-6	-0.3368
YGL022W	STT3	stt3-2	-0.331
YGL142C	GPI10	gpi10-ph	-0.3262
YAL025C	MAK16	mak16-ph	-0.3254
YGL120C	PRP43	prp43-ts2	-0.3247
YMR021C	MAC1	DMA	-0.3194
YBR200W	BEM1	DMA	-0.3051
YBL041W	PRE7	pre7-ph	-0.3048
YML103C	NUP188	DMA	-0.3
YIR006C	PAN1	pan1-4	-0.2986
YLR087C	CSF1	DMA	-0.298
YFL039C	ACT1	act1-121	-0.2906
YDR389W	SAC7	DMA	-0.2903
YFL039C	ACT1	act1-108	-0.286
YPR181C	SEC23	sec23-1	-0.2843
YFL039C	ACT1	act1-3	-0.2841
YBL007C	SLA1	DMA	-0.2761
YDR042C	YDR042C	DMA	-0.2735
YKR081C	RPF2	rpf2-ph	-0.2716
YFL039C	ACT1	act1-125	-0.2697
YJR057W	CDC8	cdc8-1	-0.2683
YIL106W	MOB1	yil106w-ph	-0.2637
YML023C	NSE5	nse5-ts3	-0.2606
YLL040C	VPS13	DMA	-0.2522
YDL102W	POL3	cdc2-7	-0.2507
YDR062W	LCB2	lcb2-2	-0.2505
YCL052C	PBN1	pbn1-ph	-0.2494
YDR182W	CDC1	cdc1-1	-0.2461
YKL024C	URA6	ura6-5	-0.2418
YOR035C	SHE4	DMA	-0.2404
YIL118W	RHO3	rho3-ser228	-0.24
YOR308C	SNU66	DMA	-0.24
YHR127W	YHR127W	DMA	-0.2397
YKR099W	BAS1	DMA	-0.2385
YHR025W	THR1	DMA	-0.2368
YAL024C	LTE1	DMA	-0.2365
YKR035W-A	DID2	DMA	-0.2342
YFL039C	ACT1	act1-105	-0.2328
YGL168W	HUR1	DMA	-0.2324
YAL041W	CDC24	cdc24-5	-0.2299
YDR416W	SYF1	ydr416w-ph	-0.2284
YCR063W	BUD31	DMA	-0.2283
YGL022W	STT3	stt3-7	-0.2271
YDR016C	DAD1	dad1-ph	-0.227
YAL017W	PSK1	DMA	-0.2266
YGL167C	PMR1	DMA	-0.2264
YJR006W	POL31	pol31-ph	-0.2249
YMR207C	HFA1	DMA	-0.2244
YLL045C	RPL8B	DMA	-0.2239
YCL025C	AGP1	DMA	-0.2194
YDL105W	NSE4	nse4-ph	-0.2187
YKL048C	ELM1	DMA	-0.2114
YPR092W	YPR092W	DMA	-0.21
YBR084C-A	RPL19A	DMA	-0.2098
YML023C	NSE5	nse5-ts2	-0.2095
YKR001C	VPS1	DMA	-0.2092
YFL039C	ACT1	act1-132	-0.209
YOR208W	PTP2	DMA	-0.2079
YOR366W	YOR366W	DMA	-0.2013
YGL044C	RNA15	rna15-58	-0.1992
YMR123W	PKR1	DMA	-0.1988
YHR031C	RRM3	DMA	-0.1984
YBR126C	TPS1	DMA	-0.198
YNL102W	POL1	pol1-12	-0.1968
YDL240W	LRG1	DMA	-0.1944
YCR077C	PAT1	DMA	-0.1941
YNR005C	YNR005C	DMA	-0.1931
YDR048C	YDR048C	DMA	-0.1906
YFL039C	ACT1	act1-136	-0.189
YLR448W	RPL6B	DMA	-0.1877
YKL041W	VPS24	DMA	-0.1873
YAR019C	CDC15	cdc15-2	-0.1869
YBR102C	EXO84	exo84-102	-0.1866
YOL102C	TPT1	yol102c-ph	-0.1856
YOR181W	LAS17	las17-14	-0.1843
YMR028W	TAP42	tap42-11	-0.1841
YOR189W	IES4	DMA	-0.183
YBR147W	RTC2	DMA	-0.1791
YGL084C	GUP1	DMA	-0.179
YOR306C	MCH5	DMA	-0.1778
YPL160W	CDC60	cdc60-ts	-0.1773
YDR054C	CDC34	cdc34-1	-0.1762
YPR016C	TIF6	ypr016c-ph	-0.1745
YLR197W	NOP56	nop56-ph	-0.1733
YBR220C	YBR220C	DMA	-0.1715
YBR082C	UBC4	DMA	-0.1711
YGR061C	ADE6	DMA	-0.1698
YHL029C	OCA5	DMA	-0.1695
YKL060C	FBA1	ykl060c-ph	-0.1693
YML063W	RPS1B	DMA	-0.1689
YDR212W	TCP1	tcp1-2	-0.1686
YDR074W	TPS2	DMA	-0.1686
YER125W	RSP5	rsp5-1	-0.1673
YOR089C	VPS21	DMA	-0.1673
YDL145C	COP1	cop1-1	-0.1667
YDL180W	YDL180W	DMA	-0.1666
YFL034C-B	MOB2	mob2-38	-0.166
YNR006W	VPS27	DMA	-0.1649
YLR047C	FRE8	DMA	-0.1641
YDR050C	TPI1	tpi1-1670	-0.1641
YLR082C	SRL2	DMA	-0.1636
YNL061W	NOP2	nop2-3	-0.1632
YGL196W	DSD1	DMA	-0.1615
YOR280C	FSH3	DMA	-0.16
YBR015C	MNN2	DMA	-0.1597
YLR183C	TOS4	DMA	-0.1595
YJL097W	PHS1	phs1-ph	-0.1595
YLR029C	RPL15A	ylr029c-ph	-0.1591
YOR197W	MCA1	DMA	-0.1589
YDL207W	GLE1	gle1-4	-0.1567
YBL078C	ATG8	DMA	-0.1566
YOR307C	SLY41	DMA	-0.1559
YAL041W	CDC24	cdc24-11	-0.1558
YOR326W	MYO2	myo2-14	-0.1556
YBR119W	MUD1	DMA	-0.1549
YBR224W	YBR224W	DMA	-0.1548
YLR119W	SRN2	DMA	-0.1545
YCR079W	PTC6	DMA	-0.154
YFL039C	ACT1	act1-124	-0.1537
YOR312C	RPL20B	DMA	-0.1533
YFL036W	RPO41	DMA	-0.1522
YBR135W	CKS1	cks1-38	-0.1522
YNL138W	SRV2	srv2-2	-0.1512
YGR206W	MVB12	DMA	-0.1509
YDR525W	YDR525W	DMA	-0.1504
YFL039C	ACT1	act1-101	-0.1493
YPR194C	OPT2	DMA	-0.1484
YLR459W	GAB1	gab1-1	-0.148
YLR099C	ICT1	DMA	-0.1475
YDL014W	NOP1	nop1-3	-0.1473
YOR004W	UTP23	utp23-ph	-0.1472
YPL076W	GPI2	gpi2-774	-0.1472
YFR004W	RPN11	rpn11-14	-0.1461
YBR009C	HHF1	DMA	-0.1452
YBR135W	CKS1	cks1-35	-0.1436
YDL010W	GRX6	DMA	-0.1434
YGR092W	DBF2	dbf2-2	-0.1432
YDR157W	YDR157W	DMA	-0.1428
YPL261C	YPL261C	DMA	-0.1419
YMR127C	SAS2	DMA	-0.1417
YFL039C	ACT1	act1-112	-0.1407
YKL061W	BLI1	DMA	-0.1403
YKR101W	SIR1	DMA	-0.1403
YBR273C	UBX7	DMA	-0.14
YDR059C	UBC5	DMA	-0.1399
YGR091W	PRP31	prp31-ts	-0.1394
YJL106W	IME2	DMA	-0.1387
YBR160W	CDC28	cdc28-1	-0.1387
YLR083C	EMP70	DMA	-0.1383
YPL227C	ALG5	DMA	-0.1374
YLR014C	PPR1	DMA	-0.1373
YCR033W	SNT1	DMA	-0.1373
YFL039C	ACT1	act1-122	-0.1372
YOL041C	NOP12	DMA	-0.1363
YOR076C	SKI7	DMA	-0.1362
YCL016C	DCC1	DMA	-0.1355
YDR409W	SIZ1	DMA	-0.1341
YPL258C	THI21	DMA	-0.134
YJL119C	YJL119C	DMA	-0.1339
YGL022W	STT3	stt3-1	-0.1334
YLR347C	KAP95	kap95-l63a	-0.133
YKR048C	NAP1	DMA	-0.1311
YDR434W	GPI17	gpi17-ph	-0.1302
YPR179C	HDA3	DMA	-0.1297
YIL154C	IMP2'	DMA	-0.1291
YBL047C	EDE1	DMA	-0.129
YGL149W	YGL149W	DMA	-0.1285
YJR112W	NNF1	nnf1-77	-0.1271
YDL106C	PHO2	DMA	-0.1267
YHR045W	YHR045W	DMA	-0.1258
YFL017C	GNA1	yfl017c-ph	-0.1249
YER044C-A	MEI4	DMA	-0.1243
YJL011C	RPC17	yjl011c-ph	-0.1238
YFL034C-B	MOB2	mob2-22	-0.1234
YPL244C	HUT1	DMA	-0.1233
YCR002C	CDC10	cdc10-4	-0.1233
YBL083C	YBL083C	DMA	-0.1223
YCL069W	VBA3	DMA	-0.1216
YNL046W	YNL046W	DMA	-0.1215
YIR010W	DSN1	dsn1-7	-0.1214
YDL062W	YDL062W	DMA	-0.1213
YGR078C	PAC10	DMA	-0.1206
YDL028C	MPS1	mps1-3796	-0.1205
YFL039C	ACT1	act1-120	-0.1204
YLR294C	YLR294C	DMA	0.1604
YDR463W	STP1	DMA	0.1613
YHR146W	CRP1	DMA	0.1617
YBR238C	YBR238C	DMA	0.1618
YPL094C	SEC62	sec62-ts	0.1621
YLR393W	ATP10	DMA	0.1623
YLL050C	COF1	cof1-8	0.1629
YGR143W	SKN1	DMA	0.1639
YPL028W	ERG10	erg10-1	0.1643
YGR132C	PHB1	DMA	0.1645
YIR023W	DAL81	DMA	0.1648
YLR056W	ERG3	DMA	0.1649
YGL154C	LYS5	DMA	0.1651
YMR296C	LCB1	lcb1-2	0.1652
YDL140C	RPO21	rpo21-1	0.1654
YMR223W	UBP8	DMA	0.1655
YKL023W	YKL023W	DMA	0.1663
YKL018W	SWD2	swd2-1	0.1665
YLL048C	YBT1	DMA	0.1671
YKL196C	YKT6	ykt6-ph	0.1673
YBR060C	ORC2	orc2-2	0.1674
YPL135W	ISU1	DMA	0.1675
YGL235W	YGL235W	DMA	0.1675
YGL211W	NCS6	DMA	0.1677
YLR268W	SEC22	DMA	0.1678
YCR061W	YCR061W	DMA	0.1679
YLR061W	RPL22A	DMA	0.1683
YJR059W	PTK2	DMA	0.1686
YPR043W	RPL43A	DMA	0.1687
YBL034C	STU1	stu1-8	0.172
YKL032C	IXR1	DMA	0.1731
YHL025W	SNF6	DMA	0.1744
YPL066W	RGL1	DMA	0.1746
YMR197C	VTI1	vti1-11	0.1756
YNR026C	SEC12	sec12-1	0.1768
YER157W	COG3	cog3-1	0.1771
YDR171W	HSP42	DMA	0.1775
YJR076C	CDC11	cdc11-1	0.1781
YER092W	IES5	DMA	0.18
YPR044C	YPR044C	DMA	0.1801
YOL130W	ALR1	yol130w-ph	0.1809
YGL160W	AIM14	DMA	0.1812
YGR264C	MES1	mes1-1	0.1815
YKR086W	PRP16	prp16-ts	0.1837
YJR087W	YJR087W	DMA	0.1849
YPR161C	SGV1	sgv1-80	0.185
YDR123C	INO2	DMA	0.1852
YJL136C	RPS21B	DMA	0.186
YPL037C	EGD1	DMA	0.1864
YPR074C	TKL1	DMA	0.1872
YLR127C	APC2	apc2-8	0.1875
YGR216C	GPI1	gpi1-1	0.1887
YJL071W	ARG2	DMA	0.1892
YNL061W	NOP2	nop2-9	0.1893
YOL001W	PHO80	DMA	0.1895
YNR020C	ATP23	DMA	0.1905
YKR024C	DBP7	DMA	0.191
YBL021C	HAP3	DMA	0.1931
YDR512C	EMI1	DMA	0.1942
YML081C-A	ATP18	DMA	0.1951
YOR008C	SLG1	DMA	0.1951
YLR320W	MMS22	DMA	0.1965
YKL062W	MSN4	DMA	0.199
YER093C-A	AIM11	DMA	0.2005
YMR240C	CUS1	cus1-3	0.2014
YIL022W	TIM44	tim44-8	0.203
YIL090W	ICE2	DMA	0.203
YKL172W	EBP2	ebp2-1	0.2031
YDR280W	RRP45	rrp45-ph	0.2035
YDR392W	SPT3	DMA	0.2036
YLR086W	SMC4	smc4-1	0.2037
YHR153C	SPO16	DMA	0.2042
YDR228C	PCF11	pcf11-ts9	0.2044
YBR257W	POP4	pop4-ph	0.2055
YDR395W	SXM1	DMA	0.2061
YKL112W	ABF1	abf1-102	0.2073
YIL076W	SEC28	DMA	0.2083
YJL046W	AIM22	DMA	0.2097
YBR193C	MED8	med8-39	0.2098
YLR089C	ALT1	DMA	0.2112
YKL053W	YKL053W	DMA	0.2127
YGL236C	MTO1	DMA	0.215
YBR109C	CMD1	cmd1-3	0.2151
YJR117W	STE24	DMA	0.2171
YKL165C	MCD4	mcd4-174	0.2172
YIL109C	SEC24	sec24-20	0.2173
YBR118W	TEF2	DMA	0.2186
YDL061C	RPS29B	DMA	0.2195
YCL032W	STE50	DMA	0.2209
YJR090C	GRR1	DMA	0.2273
YLR425W	TUS1	DMA	0.2273
YNR017W	TIM23	tim23-ph	0.2278
YHR186C	KOG1	kog1-1	0.2278
YJL204C	RCY1	DMA	0.2281
YNL117W	MLS1	DMA	0.2286
YBR248C	HIS7	DMA	0.229
YHR036W	BRL1	brl1-k405i	0.2302
YDL175C	AIR2	DMA	0.2317
YER148W	SPT15	spt15-i143n	0.2335
YKR083C	DAD2	dad2-9	0.2346
YBR247C	ENP1	enp1-1	0.2348
YAL041W	CDC24	cdc24-2	0.2375
YIR034C	LYS1	DMA	0.2376
YDR164C	SEC1	sec1-1	0.2396
YCL044C	MGR1	DMA	0.2409
YPL098C	MGR2	DMA	0.242
YCR071C	IMG2	DMA	0.2448
YCR081W	SRB8	DMA	0.245
YLR034C	SMF3	DMA	0.2453
YKL052C	ASK1	ask1-2	0.2476
YPR134W	MSS18	DMA	0.2486
YOR249C	APC5	apc5-ca	0.2499
YPR060C	ARO7	DMA	0.2518
YBL105C	PKC1	pkc1-2	0.2521
YJL101C	GSH1	DMA	0.2535
YNL076W	MKS1	DMA	0.2553
YMR039C	SUB1	DMA	0.2555
YIL061C	SNP1	yil061c-ph	0.2557
YPR024W	YME1	DMA	0.2607
YDL108W	KIN28	kin28-ts	0.2651
YJL088W	ARG3	DMA	0.2652
YGL127C	SOH1	DMA	0.2685
YPR095C	SYT1	DMA	0.2693
YPR023C	EAF3	DMA	0.27
YOL058W	ARG1	DMA	0.2704
YBR145W	ADH5	DMA	0.2707
YOR103C	OST2	ost2-ph	0.2711
YJL175W	YJL175W	DMA	0.2727
YDR375C	BCS1	DMA	0.275
YOR174W	MED4	med4-54	0.2794
YJL050W	MTR4	mtr4-1	0.2809
YDR234W	LYS4	DMA	0.2833
YLR371W	ROM2	DMA	0.2835
YOL021C	DIS3	dis3-1	0.2849
YOR232W	MGE1	mge1-100	0.2863
YML069W	POB3	pob3-q308k	0.2867
YKL137W	CMC1	DMA	0.2869
YLR373C	VID22	DMA	0.287
YBR202W	MCM7	cdc47-ts	0.2886
YHR007C	ERG11	erg11-td	0.2892
YMR272C	SCS7	DMA	0.2893
YLR115W	CFT2	cft2-ph	0.2913
YOR151C	RPB2	rpb2-6	0.2913
YLR430W	SEN1	sen1-1	0.293
YPR034W	ARP7	arp7-e411k	0.2945
YDR116C	MRPL1	DMA	0.2949
YDR127W	ARO1	DMA	0.2952
YNR010W	CSE2	DMA	0.2961
YPR070W	MED1	DMA	0.2981
YDR207C	UME6	DMA	0.2991
YDR182W	CDC1	cdc1-4	0.3015
YDL008W	APC11	apc11-13	0.3033
YBL025W	RRN10	DMA	0.3057
YJR073C	OPI3	DMA	0.3072
YER093C	TSC11	tsc11-1	0.3075
YLR026C	SED5	sed5-1	0.3082
YHR189W	PTH1	DMA	0.3088
YHR058C	MED6	med6-ph	0.31
YKL006C-A	SFT1	sft1-15	0.3128
YBR115C	LYS2	DMA	0.3139
YLR337C	VRP1	DMA	0.3149
YBR194W	AIM4	DMA	0.3167
YBR137W	YBR137W	DMA	0.3173
YKR062W	TFA2	tfa2-45	0.3178
YIL084C	SDS3	DMA	0.3191
YBR142W	MAK5	mak5-ph	0.3214
YIL150C	MCM10	mcm10-1	0.3238
YGL113W	SLD3	sld3-ph	0.3239
YOR174W	MED4	med4-6	0.3241
YFR025C	HIS2	DMA	0.3308
YER055C	HIS1	DMA	0.3315
YHR164C	DNA2	dna2-1	0.334
YOR001W	RRP6	DMA	0.3343
YBR036C	CSG2	DMA	0.3347
YBR095C	RXT2	DMA	0.3349
YGR157W	CHO2	DMA	0.337
YGL043W	DST1	DMA	0.3393
YDR311W	TFB1	tfb1-1	0.3394
YCL030C	HIS4	DMA	0.3523
YDL013W	SLX5	DMA	0.3531
YDR081C	PDC2	ydr081c-ph	0.3534
YJL130C	URA2	DMA	0.3544
YER171W	RAD3	rad3-ts14	0.3545
YGL218W	YGL218W	DMA	0.3689
YOR360C	PDE2	DMA	0.3778
YDR460W	TFB3	tfb3-ts	0.3799
YIL116W	HIS5	DMA	0.3821
YKL042W	SPC42	spc42-10	0.3831
YLR233C	EST1	DMA	0.3857
YIL094C	LYS12	DMA	0.3901
YER069W	ARG5	DMA	0.4031
YLR071C	RGR1	rgr1-100	0.4079
YOL081W	IRA2	DMA	0.4151
YPR086W	SUA7	ypr086w-ph	0.4219
YDR364C	CDC40	cdc40-ts	0.4335
YKR037C	SPC34	spc34-5	0.4359
YPL204W	HRR25	hrr25-ph	0.4364
YGL009C	LEU1	DMA	0.4506
YPL057C	SUR1	DMA	0.4514
YOR204W	DED1	ded1-f144c	0.46
YLR357W	RSC2	DMA	0.4807
YML065W	ORC1	orc1-ph	0.4848
YIL134W	FLX1	DMA	0.4917
YLR005W	SSL1	ssl1-t242i	0.4998
YOR181W	LAS17	las17-1	0.5008
YMR112C	MED11	med11-ts	0.5108
YPL255W	BBP1	bbp1-1	0.5154
YGL024W	YGL024W	DMA	0.5522
YGR195W	SKI6	ski6-ph	0.5718
YDR172W	SUP35	sup35-td	0.6837

## Sheet: tGFPop_positive_negative
Array ORF	Array Name	Array annotation	tGFP
YPL255W	BBP1	bbp1-1	0.6004
YOR142W	LSC1	DMA	0.4123
YGR195W	SKI6	ski6-ph	0.4092
YDR159W	SAC3	DMA	0.3826
YGR270W	YTA7	DMA	0.3788
YML065W	ORC1	orc1-ph	0.3638
YLR061W	RPL22A	DMA	0.3424
YBL023C	MCM2	mcm2-1	0.3387
YDR288W	NSE3	nse3-ph	0.3377
YIL150C	MCM10	mcm10-1	0.3345
YBR109C	CMD1	cmd1-3	0.3238
YGL113W	SLD3	sld3-ph	0.3198
YDR127W	ARO1	DMA	0.3098
YLR233C	EST1	DMA	0.3056
YPR060C	ARO7	DMA	0.3055
YBR060C	ORC2	orc2-1	0.3024
YIL134W	FLX1	DMA	0.2964
YBR194W	AIM4	DMA	0.2955
YKL006C-A	SFT1	sft1-15	0.2884
YLR357W	RSC2	DMA	0.2826
YJR073C	OPI3	DMA	0.2817
YDR299W	BFR2	bfr2-ph	0.2806
YLR045C	STU2	stu2-10	0.2742
YHR118C	ORC6	orc6-ph	0.2709
YPR162C	ORC4	ypr162c-ph	0.2659
YKL095W	YJU2	yju2-ph	0.2445
YDR292C	SRP101	srp101-47	0.2371
YDR359C	EAF1	DMA	0.2328
YKL042W	SPC42	spc42-10	0.2256
YGR231C	PHB2	DMA	0.2254
YMR031W-A	YMR031W-A	DMA	0.2254
YHR058C	MED6	med6-ph	0.225
YKR062W	TFA2	tfa2-45	0.225
YLR115W	CFT2	cft2-ph	0.2237
YHR058C	MED6	med6-ts	0.2233
YBR060C	ORC2	orc2-2	0.221
YER093C-A	AIM11	DMA	0.2184
YDR173C	ARG82	DMA	0.218
YGR245C	SDA1	sda1-2	0.2152
YLR371W	ROM2	DMA	0.2136
YDR207C	UME6	DMA	0.212
YHR153C	SPO16	DMA	0.2109
YJR017C	ESS1	ess1-h164r	0.2101
YMR094W	CTF13	ctf13-30	0.203
YKL088W	CAB3	cab3-ph	0.2022
YOR360C	PDE2	DMA	0.1951
YGL218W	YGL218W	DMA	0.1944
YDL217C	TIM22	tim22-19	0.1905
YBR202W	MCM7	cdc47-ts	0.1904
YHR036W	BRL1	brl1-k405i	0.1895
YKL023W	YKL023W	DMA	0.1881
YPL205C	YPL205C	DMA	0.1879
YER151C	UBP3	DMA	0.187
YLR026C	SED5	sed5-1	0.1853
YPR110C	RPC40	rpc40-v78r	0.1829
YDR172W	SUP35	sup35-td	0.1829
YBL013W	FMT1	DMA	0.1823
YJL090C	DPB11	dpb11-1	0.1815
YGL130W	CEG1	ceg1-3	0.1812
YPL037C	EGD1	DMA	0.181
YKR037C	SPC34	spc34-5	0.1803
YHR101C	BIG1	big1-ph	0.1773
YDR395W	SXM1	DMA	0.1737
YGR157W	CHO2	DMA	0.1728
YGR132C	PHB1	DMA	0.1723
YML048W	GSF2	DMA	0.1706
YBR060C	ORC2	orc2-4	0.1679
YBR156C	SLI15	sli15-3	0.1669
YLR337C	VRP1	DMA	0.1666
YJL072C	PSF2	yjl072c-ph	0.1642
YHR035W	YHR035W	DMA	0.1636
YPR043W	RPL43A	DMA	0.1633
YMR223W	UBP8	DMA	0.1627
YKL139W	CTK1	DMA	0.1616
YBR137W	YBR137W	DMA	0.1616
YGR277C	CAB4	cab4-ph	0.1609
YFL034C-B	MOB2	mob2-20	0.1607
YLR393W	ATP10	DMA	0.1606
YMR049C	ERB1	erb1-ph	-0.12
YGL065C	ALG2	alg2-1	-0.1202
YDL191W	RPL35A	DMA	-0.1206
YBR255W	MTC4	DMA	-0.1209
YGL024W	YGL024W	DMA	-0.1216
YGR223C	HSV2	DMA	-0.1223
YKR090W	PXL1	DMA	-0.1225
YFL017C	GNA1	yfl017c-ph	-0.1241
YKR020W	VPS51	DMA	-0.1245
YOL064C	MET22	DMA	-0.1246
YAL004W	YAL004W	DMA	-0.1251
YJR076C	CDC11	cdc11-2	-0.1257
YOR035C	SHE4	DMA	-0.1265
YDR060W	MAK21	mak21-1	-0.1265
YML010C-B	YML010C-B	DMA	-0.1276
YJL062W	LAS21	DMA	-0.1297
YGL212W	VAM7	DMA	-0.1309
YMR028W	TAP42	tap42-11	-0.1314
YPL076W	GPI2	gpi2-774	-0.1319
YDR434W	GPI17	gpi17-ph	-0.1324
YFL045C	SEC53	sec53-6	-0.1328
YPL079W	RPL21B	DMA	-0.1331
YDR128W	MTC5	DMA	-0.1332
YHR034C	PIH1	DMA	-0.1335
YER143W	DDI1	DMA	-0.1343
YNR044W	AGA1	DMA	-0.1349
YCR079W	PTC6	DMA	-0.1351
YOL130W	ALR1	yol130w-ph	-0.1351
YMR280C	CAT8	DMA	-0.1353
YPL082C	MOT1	mot1-1033	-0.1355
YLR119W	SRN2	DMA	-0.1361
YHR043C	DOG2	DMA	-0.1362
YFL034C-B	MOB2	mob2-28	-0.1363
YFL018C	LPD1	DMA	-0.1364
YKR035C	YKR035C	DMA	-0.1375
YPR103W	PRE2	pre2-v214a	-0.138
YOL020W	TAT2	DMA	-0.1387
YGL007W	YGL007W	DMA	-0.1414
YDR074W	TPS2	DMA	-0.1441
YKR101W	SIR1	DMA	-0.1449
YDR409W	SIZ1	DMA	-0.1449
YKR031C	SPO14	DMA	-0.1457
YPL261C	YPL261C	DMA	-0.1479
YJR070C	LIA1	DMA	-0.1482
YDL077C	VAM6	DMA	-0.1491
YLR459W	GAB1	gab1-1	-0.1501
YDL020C	RPN4	DMA	-0.1503
YPR161C	SGV1	sgv1-80	-0.1503
YBR198C	TAF5	taf5-20	-0.1506
YDL148C	NOP14	ydl148c-ph	-0.1511
YOR089C	VPS21	DMA	-0.1513
YHR166C	CDC23	cdc23-4	-0.1514
YHR024C	MAS2	mas2-10	-0.1515
YIL022W	TIM44	tim44-8	-0.1518
YHR012W	VPS29	DMA	-0.1524
YBR160W	CDC28	cdc28-4	-0.1526
YOR082C	YOR082C	DMA	-0.154
YHR025W	THR1	DMA	-0.1545
YNR043W	MVD1	mvd1-1296	-0.1547
YLR448W	RPL6B	DMA	-0.1549
YIL090W	ICE2	DMA	-0.155
YPR094W	RDS3	rds3-1	-0.1559
YIL026C	IRR1	irr1-1	-0.1585
YDL126C	CDC48	cdc48-4601	-0.1594
YBR084C-A	RPL19A	DMA	-0.1616
YGR119C	NUP57	nup57-e17	-0.1623
YLR315W	NKP2	DMA	-0.1628
YOL123W	HRP1	hrp1-4	-0.1632
YER094C	PUP3	pup3-ph	-0.1633
YPL266W	DIM1	dim1-2	-0.1639
YPL063W	TIM50	tim50-ph	-0.1651
YPL209C	IPL1	ipl1-1	-0.1657
YBR026C	ETR1	DMA	-0.1663
YHL033C	RPL8A	DMA	-0.1666
YGL142C	GPI10	gpi10-ph	-0.1676
YDR389W	SAC7	DMA	-0.1696
YOR196C	LIP5	DMA	-0.1715
YBR126C	TPS1	DMA	-0.1728
YGR092W	DBF2	dbf2-2	-0.1746
YOL006C	TOP1	DMA	-0.1746
YOL041C	NOP12	DMA	-0.1758
YGR116W	SPT6	spt6-14	-0.176
YOR076C	SKI7	DMA	-0.1762
YLR410W	VIP1	DMA	-0.1772
YDL132W	CDC53	cdc53-1	-0.1804
YAL002W	VPS8	DMA	-0.1806
YPR183W	DPM1	dpm1-6	-0.1816
YGR113W	DAM1	dam1-19	-0.1821
YNL075W	IMP4	imp4-2	-0.1855
YOR008C	SLG1	DMA	-0.186
YHR027C	RPN1	rpn1-821	-0.1861
YPR057W	BRR1	DMA	-0.1878
YKL041W	VPS24	DMA	-0.1887
YPL010W	RET3	ret3-1	-0.1909
YFL039C	ACT1	act1-105	-0.1916
YJR072C	NPA3	npa3-ph	-0.1995
YOR057W	SGT1	sgt1-5	-0.2109
YCL037C	SRO9	DMA	-0.2116
YOR069W	VPS5	DMA	-0.2135
YGR279C	SCW4	DMA	-0.2168
YPR161C	SGV1	sgv1-35	-0.223
YOL058W	ARG1	DMA	-0.223
YMR204C	INP1	DMA	-0.2233
YLR190W	MMR1	DMA	-0.228
YGL174W	BUD13	DMA	-0.2286
YJL104W	PAM16	pam16-3	-0.2305
YKL074C	MUD2	DMA	-0.2346
YHR030C	SLT2	DMA	-0.2421
YPR133C	SPN1	spn1-k192n	-0.2432
YJL119C	YJL119C	DMA	-0.2439
YMR005W	TAF4	taf4-18	-0.2498
YOL067C	RTG1	DMA	-0.2499
YOR106W	VAM3	DMA	-0.2623
YOR078W	BUD21	DMA	-0.2634
YDL080C	THI3	DMA	-0.2639
YPL178W	CBC2	DMA	-0.2673
YDR052C	DBF4	dbf4-1	-0.2686
YOR157C	PUP1	pup1-1	-0.2721
YHL030W	ECM29	DMA	-0.2723
YFR052W	RPN12	rpn12-1	-0.2726
YMR239C	RNT1	rnt1-47	-0.2743
YAL025C	MAK16	mak16-ph	-0.2765
YNL064C	YDJ1	DMA	-0.2787
YOR308C	SNU66	DMA	-0.2855
YFL039C	ACT1	act1-2	-0.2875
YDR182W	CDC1	cdc1-1	-0.2877
YKR081C	RPF2	rpf2-ph	-0.2903
YFR050C	PRE4	pre4-ph	-0.2909
YOL038W	PRE6	pre6-ph	-0.2971
YAL024C	LTE1	DMA	-0.3004
YIL106W	MOB1	yil106w-ph	-0.3117
YDR054C	CDC34	cdc34-1	-0.3124
YBL074C	AAR2	aar2-ph	-0.3195
YDR062W	LCB2	lcb2-2	-0.32
YPL043W	NOP4	nop4-3	-0.3235
YGL048C	RPT6	rpt6-1	-0.3257
YOR362C	PRE10	yor362c-ph	-0.3261
YBL093C	ROX3	rox3-182	-0.3294
YDL105W	NSE4	nse4-ts2	-0.3553
YDL102W	POL3	cdc2-7	-0.3831
YDR311W	TFB1	tfb1-6	-0.3902
YJL085W	EXO70	exo70-29/37	-0.3908
YOL004W	SIN3	DMA	-0.3976
YGL120C	PRP43	prp43-ts2	-0.4343
YKL060C	FBA1	ykl060c-ph	-0.4842
YGL073W	HSF1	hsf1-848	-0.923

## Sheet: NES_tGFPop-positive_negative
Array ORF	Array Name	Array annotation	NES-tGFP
YOR142W	LSC1	DMA	0.4369
YPR060C	ARO7	DMA	0.4137
YGL024W	YGL024W	DMA	0.3988
YJR073C	OPI3	DMA	0.3806
YJL157C	FAR1	DMA	0.3775
YIL134W	FLX1	DMA	0.373
YGR268C	HUA1	DMA	0.3684
YGR270W	YTA7	DMA	0.3546
YLR085C	ARP6	DMA	0.3454
YPR141C	KAR3	DMA	0.316
YGL009C	LEU1	DMA	0.2986
YGR231C	PHB2	DMA	0.2946
YDR207C	UME6	DMA	0.2884
YDR127W	ARO1	DMA	0.2871
YDR159W	SAC3	DMA	0.2842
YHR081W	LRP1	DMA	0.273
YLR036C	YLR036C	DMA	0.2659
YPR074C	TKL1	DMA	0.2654
YGL244W	RTF1	DMA	0.2622
YLR320W	MMS22	DMA	0.2615
YNR010W	CSE2	DMA	0.2563
YPR134W	MSS18	DMA	0.2561
YDR116C	MRPL1	DMA	0.2547
YPR043W	RPL43A	DMA	0.2545
YGR157W	CHO2	DMA	0.2517
YDL175C	AIR2	DMA	0.2423
YKL137W	CMC1	DMA	0.2408
YCL032W	STE50	DMA	0.2366
YDR477W	SNF1	DMA	0.2363
YGL066W	SGF73	DMA	0.2334
YPR044C	YPR044C	DMA	0.2325
YFR031C	SMC2	smc2-8	0.2251
YLR305C	STT4	stt4-4	0.2235
YDR234W	LYS4	DMA	0.2234
YBR145W	ADH5	DMA	0.2224
YBR118W	TEF2	DMA	0.2201
YGL127C	SOH1	DMA	0.2197
YBR115C	LYS2	DMA	0.2167
YDR392W	SPT3	DMA	0.2159
YLR233C	EST1	DMA	0.2144
YDL192W	ARF1	DMA	0.2122
YGR132C	PHB1	DMA	0.2117
YLR401C	DUS3	DMA	0.2076
YDR291W	HRQ1	DMA	0.2062
YLR179C	YLR179C	DMA	0.2055
YDR512C	EMI1	DMA	0.2027
YIL094C	LYS12	DMA	0.2024
YMR198W	CIK1	DMA	0.2015
YLR312C	YLR312C	DMA	0.2015
YDR395W	SXM1	DMA	0.2004
YLR169W	YLR169W	DMA	0.2
YBR193C	MED8	med8-39	0.1973
YMR222C	FSH2	DMA	0.1963
YLR144C	ACF2	DMA	0.1961
YHL023C	NPR3	DMA	0.1957
YJL175W	YJL175W	DMA	0.1947
YMR012W	CLU1	DMA	0.1939
YPR162C	ORC4	ypr162c-ph	0.1915
YPR070W	MED1	DMA	0.1915
YER093C-A	AIM11	DMA	0.1903
YKL032C	IXR1	DMA	0.1897
YKL042W	SPC42	spc42-11	0.1872
YML062C	MFT1	DMA	0.1869
YGL043W	DST1	DMA	0.1869
YER069W	ARG5	DMA	0.1825
YPR024W	YME1	DMA	0.1807
YPR033C	HTS1	hts1-1	0.1798
YOR360C	PDE2	DMA	0.1795
YPR045C	THP3	DMA	0.179
YNL104C	LEU4	DMA	0.1784
YHR153C	SPO16	DMA	0.1774
YKL184W	SPE1	DMA	0.1769
YOL126C	MDH2	DMA	0.1764
YLR118C	YLR118C	DMA	0.1753
YLR007W	NSE1	nse1-16	0.1741
YAL062W	GDH3	DMA	0.1739
YJL101C	GSH1	DMA	0.1739
YBL034C	STU1	stu1-5	0.1699
YLR311C	YLR311C	DMA	0.1693
YPR173C	VPS4	DMA	0.1683
YAL011W	SWC3	DMA	0.1655
YKL149C	DBR1	DMA	0.1648
YKL154W	SRP102	srp102-510	0.1647
YLR333C	RPS25B	DMA	0.1646
YIL118W	RHO3	rho3-ser228	0.1612
YHR024C	MAS2	mas2-10	-0.1206
YOR191W	ULS1	DMA	-0.1211
YBL066C	SEF1	DMA	-0.1212
YDR541C	YDR541C	DMA	-0.1215
YDL035C	GPR1	DMA	-0.1223
YGL022W	STT3	stt3-7	-0.1225
YOL056W	GPM3	DMA	-0.1229
YBR245C	ISW1	DMA	-0.123
YCR034W	FEN1	DMA	-0.1232
YDL102W	POL3	cdc2-7	-0.1232
YML023C	NSE5	nse5-ts3	-0.1246
YDL133W	SRF1	DMA	-0.1255
YMR048W	CSM3	DMA	-0.1257
YLR308W	CDA2	DMA	-0.1262
YGL124C	MON1	DMA	-0.128
YML029W	USA1	DMA	-0.1281
YLR459W	GAB1	gab1-1	-0.1282
YMR145C	NDE1	DMA	-0.1291
YER045C	ACA1	DMA	-0.1295
YDL147W	RPN5	rpn5-1	-0.1296
YER090W	TRP2	DMA	-0.1301
YBL087C	RPL23A	DMA	-0.1302
YOL043C	NTG2	DMA	-0.1307
YNL054W	VAC7	DMA	-0.1311
YJL177W	RPL17B	DMA	-0.1314
YOR139C	YOR139C	DMA	-0.1315
YPL080C	YPL080C	DMA	-0.1328
YOR082C	YOR082C	DMA	-0.1341
YDL126C	CDC48	cdc48-1	-0.1346
YER125W	RSP5	rsp5-sm1	-0.135
YGR277C	CAB4	cab4-ph	-0.136
YDL096C	YDL096C	DMA	-0.136
YLR031W	YLR031W	DMA	-0.1362
YML063W	RPS1B	DMA	-0.1364
YDR099W	BMH2	DMA	-0.1365
YJR076C	CDC11	cdc11-3	-0.1366
YDR434W	GPI17	gpi17-ph	-0.1373
YBR015C	MNN2	DMA	-0.1386
YPL261C	YPL261C	DMA	-0.139
YOR027W	STI1	DMA	-0.1395
YLR021W	IRC25	DMA	-0.14
YGR275W	RTT102	DMA	-0.1406
YDR409W	SIZ1	DMA	-0.1413
YIR006C	PAN1	pan1-4	-0.1417
YDR087C	RRP1	rrp1-1	-0.142
YOR306C	MCH5	DMA	-0.1428
YMR137C	PSO2	DMA	-0.1428
YMR030W	RSF1	DMA	-0.1436
YPR092W	YPR092W	DMA	-0.1438
YJL104W	PAM16	pam16-3	-0.1438
YKR022C	NTR2	ykr022c-ph	-0.1473
YPL258C	THI21	DMA	-0.1494
YAL025C	MAK16	mak16-ph	-0.15
YBR009C	HHF1	DMA	-0.1504
YDL105W	NSE4	nse4-ts4	-0.1521
YLR195C	NMT1	nmt1-181	-0.1526
YDR288W	NSE3	nse3-ts3	-0.1533
YDL028C	MPS1	mps1-3796	-0.1549
YLR274W	MCM5	cdc46-1	-0.155
YOL151W	GRE2	DMA	-0.1552
YDR454C	GUK1	guk1-ph	-0.1558
YKL060C	FBA1	ykl060c-ph	-0.1577
YNR051C	BRE5	DMA	-0.1585
YOL038W	PRE6	pre6-ph	-0.1588
YPL259C	APM1	DMA	-0.1592
YLR003C	CMS1	DMA	-0.1592
YML107C	PML39	DMA	-0.1595
YOR149C	SMP3	smp3-1	-0.1597
YPL221W	FLC1	DMA	-0.1601
YKR046C	PET10	DMA	-0.1604
YLR234W	TOP3	DMA	-0.1605
YMR204C	INP1	DMA	-0.1628
YER094C	PUP3	pup3-ph	-0.1633
YAR015W	ADE1	DMA	-0.1637
YDL077C	VAM6	DMA	-0.164
YDR048C	YDR048C	DMA	-0.1643
YLR264W	RPS28B	DMA	-0.1644
YML016C	PPZ1	DMA	-0.1658
YMR200W	ROT1	rot1-ph	-0.166
YGL055W	OLE1	ole1-m2	-0.1662
YDR302W	GPI11	gpi11-ph	-0.1664
YNL064C	YDJ1	DMA	-0.1681
YFL034C-B	MOB2	mob2-22	-0.1686
YLL043W	FPS1	DMA	-0.1689
YOR298W	MUM3	DMA	-0.1706
YGL149W	YGL149W	DMA	-0.1715
YDR057W	YOS9	DMA	-0.1718
YPR165W	RHO1	rho1-td	-0.1728
YGL202W	ARO8	DMA	-0.173
YNL096C	RPS7B	DMA	-0.1731
YLR405W	DUS4	DMA	-0.1735
YDR165W	TRM82	DMA	-0.1741
YKR082W	NUP133	DMA	-0.1749
YLR193C	UPS1	DMA	-0.1754
YPR183W	DPM1	dpm1-6	-0.1755
YLR221C	RSA3	DMA	-0.1765
YLR212C	TUB4	tub4-y445d	-0.1781
YGL212W	VAM7	DMA	-0.1788
YNR005C	YNR005C	DMA	-0.1795
YPL076W	GPI2	gpi2-774	-0.1812
YNL126W	SPC98	spc98-ph	-0.1815
YGL174W	BUD13	DMA	-0.1836
YBR198C	TAF5	taf5-20	-0.1842
YMR126C	DLT1	DMA	-0.1844
YNL138W	SRV2	srv2-2	-0.1859
YOR259C	RPT4	rpt4-145	-0.1859
YLR200W	YKE2	DMA	-0.1865
YFL034C-B	MOB2	mob2-19	-0.1876
YGL054C	ERV14	DMA	-0.1878
YPR179C	HDA3	DMA	-0.1887
YLR134W	PDC5	DMA	-0.1907
YOR270C	VPH1	DMA	-0.1907
YER125W	RSP5	rsp5-1	-0.1909
YHR196W	UTP9	utp9-ph	-0.1914
YDL207W	GLE1	gle1-4	-0.194
YGL022W	STT3	stt3-1	-0.194
YJL119C	YJL119C	DMA	-0.1941
YHR036W	BRL1	brl1-k405i	-0.1944
YDL080C	THI3	DMA	-0.1968
YFR004W	RPN11	rpn11-14	-0.2004
YCL062W	YCL062W	DMA	-0.2004
YOR078W	BUD21	DMA	-0.2004
YHR088W	RPF1	rpf1-1	-0.2017
YBR084C-A	RPL19A	DMA	-0.2036
YAL043C-A	YAL043C-A	DMA	-0.205
YLR276C	DBP9	dbp9-ph	-0.205
YMR154C	RIM13	DMA	-0.2062
YOR030W	DFG16	DMA	-0.2065
YCR093W	CDC39	cdc39-1	-0.2065
YMR296C	LCB1	lcb1-10	-0.2118
YMR235C	RNA1	rna1-s116f	-0.2121
YBL074C	AAR2	aar2-ph	-0.2128
YFL034C-B	MOB2	mob2-26	-0.2143
YLR452C	SST2	DMA	-0.2156
YPL213W	LEA1	DMA	-0.2163
YDR074W	TPS2	DMA	-0.2166
YMR093W	UTP15	ymr093w-ph	-0.218
YGR120C	COG2	cog2-1	-0.218
YLR236C	YLR236C	DMA	-0.2191
YDR356W	SPC110	spc110-220	-0.2205
YLR338W	YLR338W	DMA	-0.2206
YAL002W	VPS8	DMA	-0.222
YHR122W	CIA2	yhr122w-ph	-0.2223
YKL069W	YKL069W	DMA	-0.2235
YOR076C	SKI7	DMA	-0.2242
YOR309C	YOR309C	DMA	-0.2257
YBR109C	CMD1	cmd1-1	-0.2258
YFL039C	ACT1	act1-3	-0.2301
YDL105W	NSE4	nse4-ts2	-0.2305
YAL061W	BDH2	DMA	-0.2313
YHR101C	BIG1	big1-ph	-0.2342
YOR157C	PUP1	pup1-1	-0.2359
YLR060W	FRS1	ylr060w-ph	-0.2372
YLR183C	TOS4	DMA	-0.2427
YER135C	YER135C	DMA	-0.2446
YLR214W	FRE1	DMA	-0.2467
YJL011C	RPC17	yjl011c-ph	-0.248
YDR449C	UTP6	ydr449c-ph	-0.2505
YKR101W	SIR1	DMA	-0.2508
YFL034C-B	MOB2	mob2-38	-0.2513
YMR232W	FUS2	DMA	-0.2526
YGL048C	RPT6	rpt6-1	-0.2553
YDR531W	CAB1	cab1-ph	-0.2569
YPR108W	RPN7	rpn7-3	-0.2572
YML023C	NSE5	nse5-ts4	-0.2627
YDR042C	YDR042C	DMA	-0.2679
YDR002W	YRB1	yrb1-51	-0.2711
YLR315W	NKP2	DMA	-0.2737
YNL075W	IMP4	imp4-2	-0.275
YMR127C	SAS2	DMA	-0.2804
YKL145W	RPT1	rpt1-1	-0.2822
YDL148C	NOP14	ydl148c-ph	-0.2832
YGR119C	NUP57	nup57-e17	-0.2833
YLR394W	CST9	DMA	-0.2837
YLR406C	RPL31B	DMA	-0.2843
YBL079W	NUP170	DMA	-0.2844
YFL039C	ACT1	act1-2	-0.2892
YLR111W	YLR111W	DMA	-0.2904
YBR080C	SEC18	sec18-1	-0.2924
YCL004W	PGS1	ycl004w-ph	-0.2929
YLR316C	TAD3	tad3-ph	-0.2949
YGL120C	PRP43	prp43-ts2	-0.296
YPL128C	TBF1	tbf1-ph	-0.2979
YDR168W	CDC37	cdc37-ts	-0.3013
YML103C	NUP188	DMA	-0.3018
YIL115C	NUP159	nup159-1	-0.303
YLR372W	SUR4	DMA	-0.3058
YNR038W	DBP6	dbp6-ph	-0.313
YPL161C	BEM4	DMA	-0.3167
YDL105W	NSE4	nse4-ph	-0.3171
YDR062W	LCB2	lcb2-2	-0.3171
YOR312C	RPL20B	DMA	-0.3263
YIL026C	IRR1	irr1-1	-0.3268
YGR081C	SLX9	DMA	-0.3287
YGL137W	SEC27	sec27-1	-0.3342
YDL132W	CDC53	cdc53-1	-0.3354
YDL147W	RPN5	rpn5-ph	-0.3358
YML042W	CAT2	DMA	-0.351
YLR145W	RMP1	rmp1-ts	-0.3555
YBR102C	EXO84	exo84-102	-0.3606
YBL093C	ROX3	rox3-182	-0.363
YBR126C	TPS1	DMA	-0.3649
YBR082C	UBC4	DMA	-0.383
YOR307C	SLY41	DMA	-0.3968
YDR311W	TFB1	tfb1-6	-0.4287
YKR081C	RPF2	rpf2-ph	-0.4323
YMR235C	RNA1	rna1-1	-0.4407
YJL085W	EXO70	exo70-29/37	-0.4554
YOR362C	PRE10	yor362c-ph	-0.4774
YHR036W	BRL1	brl1-2221	-0.4986
YFR050C	PRE4	pre4-ph	-0.5003
YHR036W	BRL1	brl1-c371s	-0.502
YLR293C	GSP1	gsp1-p162l	-0.5214
YDL015C	TSC13	tsc13-ph	-0.5245
YHR036W	BRL1	brl1-c371r	-0.5444
YHR027C	RPN1	rpn1-821	-0.5878
YGL142C	GPI10	gpi10-ph	-0.6499
YGR218W	CRM1	crm1-1	-0.8111
