# Supplementary material for: Genetic profiling of protein burden and nuclear export overload
Source: eLife journal article supplement (doi:10.7554/elife.54080), 2020-11-04
Supplement: supp [file elife-54080-supp-v1.zip › elife_poa_e54080_Figure_4_source_data_1.xlsx]

## Sheet: GFPunit (GFP)
ORF	Gene_Name	Allele	array name	GFPunit_Rep1	GFPunit_Rep2	GFPunit_Average	GFPunit_STDEV	GFPunuit (log2)	GFP-op_posi	GFP-op_nega
YAL001C	TFC3	tfc3-g349e	TSA	1.45901	1.33347	1.39624	0.0887747	0.481549
YAL002W	VPS8		DMA	0.733879	0.797098	0.765489	0.0447022	-0.385547		1
YAL002W	VPS8		TSA	1.01688	1.07358	1.04523	0.0400933	0.0638214
YAL003W	EFB1	efb1-4	TSA	0.622928	1.03485	0.828889	0.291273	-0.27075
YAL004W			DMA	1.04126	1.05846	1.04986	0.0121632	0.0701933
YAL005C	SSA1		DMA	1.11852	1.05402	1.08627	0.0456107	0.11938
YAL007C	ERP2		DMA	1.09635	1.24362	1.16998	0.104133	0.226486
YAL008W	FUN14		DMA	1.1634	1.24987	1.20664	0.0611429	0.270991
YAL010C	MDM10		DMA	0.837178	0.858402	0.84779	0.0150078	-0.238222
YAL011W	SWC3		DMA	0.898916	0.882374	0.890645	0.0116969	-0.167077
YAL011W	SWC3		TSA	1.12184	1.06076	1.0913	0.0431941	0.126047
YAL013W	DEP1		DMA	0.815229	0.846065	0.830647	0.0218041	-0.267693
YAL013W	DEP1		TSA	1.06113	1.01982	1.04047	0.029212	0.0572405
YAL014C	SYN8		DMA	1.04377	0.998656	1.02121	0.0319021	0.030285
YAL015C	NTG1		DMA	0.966518	0.998583	0.982551	0.0226736	-0.0253962
YAL017W	PSK1		DMA	1.07284	0.998173	1.0355	0.0527939	0.0503335		1
YAL018C	LDS1		DMA	1.31445	1.15246	1.23345	0.114544	0.302702
YAL019W	FUN30		DMA	1.14688	1.0655	1.10619	0.0575475	0.145601
YAL020C	ATS1		DMA	1.05916	0.98424	1.0217	0.0529796	0.0309743
YAL022C	FUN26		DMA	1.11099	1.08679	1.09889	0.0171108	0.136048
YAL023C	PMT2		DMA	1.31437	1.29673	1.30555	0.0124713	0.384661
YAL024C	LTE1		DMA	0.804657	0.830802	0.817729	0.0184874	-0.290304		1
YAL025C	MAK16	mak16-5001	TSA	0.889977	0.899926	0.894951	0.00703522	-0.160119		1
YAL026C	DRS2		DMA	0.639299	0.566639	0.602969	0.0513784	-0.729844
YAL027W	SAW1		DMA	1.06281	1.058	1.06041	0.0034058	0.0846176
YAL028W	FRT2		DMA	0.99916	1.01144	1.0053	0.00868363	0.00762685
YAL029C	MYO4		DMA	1.0133	1.05842	1.03586	0.0319083	0.0508307
YAL030W	SNC1		DMA	0.948259	0.972034	0.960147	0.0168111	-0.0586732
YAL031C	GIP4		DMA	1.0593	1.02661	1.04296	0.0231148	0.0606792
YAL034C	FUN19		DMA	1.05096	1.08966	1.07031	0.027365	0.0980284
YAL034W-A	MTW1	mtw1-ts	TSA	1.16896	1.06032	1.11464	0.076822	0.156574
YAL036C	RBG1		DMA	1.19191	1.13127	1.16159	0.0428815	0.216104
YAL037W			DMA	1.06281	1.08308	1.07295	0.0143305	0.10158
YAL038W	CDC19	cdc19-1	TSA	1.15042	1.17108	1.16075	0.0146103	0.21506
YAL040C	CLN3		DMA	1.05948	1.11206	1.08577	0.0371777	0.118715
YAL041W	CDC24	cdc24-2	TSA	1.24177	1.18474	1.21326	0.0403287	0.278885	1
YAL041W	CDC24	cdc24-5	TSA	1.06981	0.910241	0.990027	0.112835	-0.0144596		1
YAL041W	CDC24	cdc24-3	TSA	1.07609	1.01416	1.04513	0.0437848	0.0636762
YAL041W	CDC24	cdc24-11	TSA	1.12008	1.1202	1.12014	8.37935e-05	0.163683
YAL041W	CDC24	cdc24-1	TSA	1.17895	1.26508	1.22201	0.0608992	0.289262
YAL041W	CDC24	cdc24-h	TSA	1.2552	1.18886	1.22203	0.04691	0.289284
YAL041W	CDC24	cdc24-4	TSA	1.41991	1.30832	1.36411	0.0789074	0.447962
YAL042C-A			DMA	1.07601	1.29409	1.18505	0.154201	0.244947
YAL042W	ERV46		DMA	1.23987	0.428597	0.834232	0.573654	-0.261479
YAL045C			DMA	0.972515	1.09072	1.03162	0.0835799	0.044905
YAL046C	AIM1		DMA	1.12407	1.38133	1.2527	0.18191	0.325039
YAL048C	GEM1		DMA	0.993874	0.995469	0.994672	0.00112769	-0.00770749
YAL049C	AIM2		DMA	1.0391	0.992376	1.01574	0.0330418	0.0225317
YAL051W	OAF1		DMA	1.10904	1.10322	1.10613	0.00410942	0.14552
YAL053W	FLC2		DMA	1.03349	0.947886	0.990689	0.0605327	-0.0134952
YAL054C	ACS1		DMA	1.04831	1.0574	1.05285	0.00643356	0.0743063
YAL055W	PEX22		DMA	1.15694	1.15536	1.15615	0.0011167	0.209328
YAL056C-A			DMA	1.18042	1.19266	1.18654	0.00865483	0.246757
YAL056W	GPB2		DMA	1.38847	0.992376	1.19042	0.280077	0.251472
YAL058W	CNE1		DMA	1.30633	1.34746	1.3269	0.0290791	0.408055
YAL059W	ECM1		DMA	1.06281	1.08634	1.07458	0.0166331	0.103768
YAL060W	BDH1		DMA	1.19285	1.14511	1.16898	0.0337638	0.22525
YAL061W	BDH2		DMA	1.21711	1.09246	1.15478	0.0881438	0.207621
YAL062W	GDH3		DMA	1.02438	1.22027	1.12233	0.138511	0.166493
YAL064C-A	TDA8		DMA	1.18737	1.05245	1.11991	0.0954012	0.163384
YAL065C			DMA	1.17258	1.04107	1.10683	0.0929894	0.146431
YAL066W			DMA	0.998738	1.04719	1.02296	0.0342615	0.0327564
YAL067C	SEO1		DMA	1.06719	1.18256	1.12487	0.0815819	0.169762
YAL068C	PAU8		DMA	1.18903	1.10678	1.14791	0.058165	0.199005
YAR002C-A	ERP1		DMA	1.20143	1.07565	1.13854	0.08894	0.187181
YAR002W	NUP60		DMA	1.08862	1.0559	1.07226	0.0231379	0.100656
YAR003W	SWD1		DMA	0.9094	0.94966	0.92953	0.0284683	-0.105427
YAR007C	RFA1	rfa1-m2	TSA	1.18042	1.22098	1.2007	0.0286819	0.263874
YAR014C	BUD14		DMA	0.65661	0.776968	0.716789	0.0851059	-0.48038
YAR015W	ADE1		DMA	1.03179	1.01917	1.02548	0.00892156	0.0363011
YAR018C	KIN3		DMA	0.888188	0.792337	0.840263	0.0677775	-0.251088		1
YAR019C	CDC15	cdc15-2	TSA	1.26072	0.977481	1.1191	0.20028	0.162339
YAR019C	CDC15	cdc15-1	TSA	1.26629	1.24969	1.25799	0.0117353	0.331119
YAR020C	PAU7		DMA	0.997488	1.03954	1.01851	0.0297325	0.0264634
YAR023C			DMA	1.01602	1.04412	1.03007	0.0198686	0.0427377
YAR027W	UIP3		DMA	1.01765	1.00659	1.01212	0.00781825	0.0173785
YAR028W			DMA	1.13484	1.13854	1.13669	0.00261245	0.184836
YAR029W			DMA	1.07632	1.1876	1.13196	0.0786884	0.178822
YAR030C			DMA	1.12064	1.205	1.16282	0.0596479	0.217628
YAR031W	PRM9		DMA	1.20937	1.23374	1.22155	0.0172296	0.288716
YAR035W	YAT1		DMA	1.0131	1.0655	1.0393	0.0370535	0.0556094
YAR037W			DMA	1.04337	1.07507	1.05922	0.022418	0.0830005
YAR040C			DMA	0.924616	1.00901	0.966812	0.0596739	-0.0486927
YAR042W	SWH1		DMA	1.04492	1.08783	1.06637	0.0303437	0.0927126
YAR043C			DMA	1.09841	0.991785	1.0451	0.0753921	0.0636345
YAR044W			DMA	0.973419	0.986314	0.979866	0.00911852	-0.029343
YAR047C			DMA	1.02474	1.03177	1.02826	0.00497223	0.0402022
YAR050W	FLO1		DMA	1.03097	1.14511	1.08804	0.0807065	0.121727
YBL001C	ECM15		DMA	1.24268	1.10079	1.17173	0.100327	0.228645
YBL003C	HTA2		DMA	1.09327	1.05966	1.07646	0.0237648	0.106301
YBL005W	PDR3		DMA	1.0645	1.01373	1.03911	0.0359039	0.0553529
YBL007C	SLA1		DMA	0.763403	0.826175	0.794789	0.0443865	-0.331356		1
YBL007C	SLA1		TSA	1.11744	1.03859	1.07801	0.0557532	0.108373
YBL008W	HIR1		DMA	0.981366	0.972034	0.9767	0.00659845	-0.0340129
YBL009W	ALK2		DMA	1.03469	1.0634	1.04904	0.0203024	0.0690714
YBL010C			DMA	1.06096	1.04434	1.05265	0.0117538	0.0740241
YBL011W	SCT1		DMA	0.893813	0.999852	0.946833	0.0749807	-0.0788187
YBL013W	FMT1		DMA	1.01702	0.99722	1.00712	0.013998	0.0102323
YBL015W	ACH1		DMA	1.09322	1.02627	1.05975	0.0473409	0.0837193
YBL016W	FUS3		DMA	0.930412	0.886271	0.908342	0.0312124	-0.138693		1
YBL017C	PEP1		DMA	1.01707	1.36739	1.19223	0.247716	0.253661
YBL019W	APN2		DMA	1.20609	1.19828	1.20218	0.00551696	0.265658
YBL021C	HAP3		DMA	1.03876	1.0927	1.06573	0.0381421	0.0918385
YBL023C	MCM2	mcm2-1	TSA	0.999948	1.06624	1.0331	0.0468784	0.046974
YBL024W	NCL1		DMA	1.16585	1.17543	1.17064	0.00677681	0.227297
YBL025W	RRN10		DMA	0.607279	0.543808	0.575543	0.0448811	-0.797003
YBL026W	LSM2	lsm2-5001	TSA	1.05435	1.13057	1.09246	0.0538922	0.127583
YBL027W	RPL19B		DMA	0.720865	0.748913	0.734889	0.0198331	-0.444402
YBL028C			DMA	1.02426	1.15884	1.09155	0.0951617	0.126381
YBL029W			DMA	1.06369	1.14766	1.10568	0.0593754	0.144929
YBL031W	SHE1		DMA	0.842912	0.486183	0.664547	0.252245	-0.589556
YBL032W	HEK2		DMA	1.02614	1.01965	1.0229	0.00458856	0.0326641
YBL034C	STU1	stu1-7	TSA	0.216533	0.303375	0.259954	0.0614064	-1.94367
YBL034C	STU1	stu1-6	TSA	1.17906	1.22571	1.20238	0.0329891	0.265898
YBL034C	STU1	stu1-8	TSA	1.30177	1.2052	1.25348	0.0682823	0.325942
YBL034C	STU1	stu1-12	TSA	1.31063	1.37038	1.3405	0.0422447	0.422775
YBL034C	STU1	stu1-5	TSA	1.41124	1.32088	1.36606	0.0638986	0.450019
YBL035C	POL12	pol12-ts	TSA	1.1647	1.04981	1.10725	0.0812395	0.146986
YBL036C			DMA	1.26907	1.03503	1.15205	0.165491	0.204208
YBL037W	APL3		DMA	1.02333	1.18836	1.10585	0.116693	0.145149
YBL039C	URA7		DMA	1.09936	1.08148	1.09042	0.012649	0.124883
YBL040C	ERD2	erd2-5001	TSA	1.20327	1.13907	1.17117	0.0453958	0.22795
YBL041W	PRE7	pre7-5001	TSA	1.25983	1.32947	1.29465	0.0492449	0.372561		1
YBL042C	FUI1		DMA	1.33496	1.10709	1.22102	0.16113	0.288091
YBL043W	ECM13		DMA	1.12124	1.08233	1.10179	0.0275157	0.139844
YBL046W	PSY4		DMA	1.33775	1.19623	1.26699	0.100069	0.341402
YBL047C	EDE1		DMA	1.02863	0.985691	1.00716	0.0303646	0.0102964
YBL048W	RRT1		DMA	1.02296	1.00539	1.01418	0.0124198	0.0203079
YBL049W	MOH1		DMA	1.07347	1.07903	1.07625	0.00392738	0.106016
YBL050W	SEC17	sec17-1	TSA	1.15525	1.19061	1.17293	0.0250084	0.230119
YBL051C	PIN4		DMA	0.958508	0.905931	0.93222	0.0371771	-0.101258
YBL052C	SAS3		DMA	1.05414	0.98285	1.01849	0.0504078	0.0264371
YBL053W			DMA	1.08635	1.12595	1.10615	0.0280048	0.145547
YBL054W	TOD6		DMA	1.06719	1.19896	1.13308	0.0931812	0.180244
YBL055C			DMA	1.12739	1.02044	1.07391	0.0756225	0.102878
YBL056W	PTC3		DMA	1.16409	1.22599	1.19504	0.0437697	0.257062
YBL057C	PTH2		DMA	1.23855	1.28579	1.26217	0.0334065	0.335906
YBL059W			DMA	0.969971	0.992546	0.981259	0.0159625	-0.0272948
YBL060W	YEL1		DMA	1.02614	1.04046	1.0333	0.0101237	0.0472625
YBL061C	SKT5		DMA	0.973971	0.972314	0.973143	0.00117175	-0.0392766
YBL062W			DMA	1.00369	1.10205	1.05287	0.0695548	0.0743283
YBL063W	KIP1		DMA	1.00508	1.04764	1.02636	0.030098	0.0375352
YBL064C	PRX1		DMA	1.13106	1.03244	1.08175	0.0697387	0.113364
YBL065W			DMA	1.2021	1.24221	1.22216	0.0283616	0.289428
YBL066C	SEF1		DMA	1.08217	1.08575	1.08396	0.00252616	0.116311
YBL067C	UBP13		DMA	1.20014	1.24614	1.22314	0.0325317	0.29059
YBL068W	PRS4		DMA	1.0452	1.17615	1.11068	0.0925942	0.15144
YBL069W	AST1		DMA	1.21411	1.18768	1.20089	0.0186909	0.264107
YBL070C			DMA	1.18389	1.17348	1.17868	0.00735943	0.237177
YBL071C			DMA	0.985008	0.949989	0.967498	0.0247622	-0.0476689
YBL072C	RPS8A		DMA	0.609927	0.464886	0.537406	0.10256	-0.895915
YBL074C	AAR2	aar2-5001	TSA	1.19098	1.15914	1.17506	0.0225154	0.23274
YBL075C	SSA3		DMA	0.994008	0.960404	0.977206	0.0237616	-0.0332653
YBL076C	ILS1	ils1-1	TSA	1.22067	0.308373	0.764521	0.64509	-0.387373
YBL078C	ATG8		DMA	0.937152	0.982556	0.959854	0.0321052	-0.0591132
YBL079W	NUP170		DMA	0.746427	0.692349	0.719388	0.0382384	-0.475158
YBL081W			DMA	1.06944	1.06111	1.06528	0.00588751	0.0912288
YBL082C	ALG3		DMA	1.02729	1.26027	1.14378	0.164737	0.19381
YBL083C			DMA	1.12447	0.9998	1.06214	0.088158	0.0869707
YBL084C	CDC27	cdc27-2	TSA	1.13301	1.23137	1.18219	0.0695535	0.241458
YBL084C	CDC27	cdc27-1	TSA	1.25825	1.31177	1.28501	0.0378484	0.361779
YBL085W	BOI1		DMA	1.32595	1.27359	1.29977	0.0370257	0.37826
YBL086C			DMA	1.12045	1.15828	1.13937	0.0267521	0.188231
YBL087C	RPL23A		DMA	0.84648	0.889359	0.86792	0.0303206	-0.204367
YBL088C	TEL1		DMA	1.17809	1.07411	1.1261	0.0735218	0.171338
YBL089W	AVT5		DMA	0.944907	0.95461	0.949759	0.00686058	-0.0743672
YBL091C	MAP2		DMA	1.06947	1.05414	1.0618	0.0108397	0.0865152
YBL091C-A	SCS22		DMA	1.00584	0.993788	0.999814	0.00852193	-0.000268539
YBL093C	ROX3	rox3-182	TSA	1.03796	0.976333	1.00714	0.0435746	0.0102712
YBL094C			DMA	0.904891	0.843875	0.874383	0.0431445	-0.193663
YBL095W	MRX3		DMA	1.42	1.28779	1.35389	0.0934825	0.437115
YBL096C			DMA	1.29376	1.04601	1.16988	0.175193	0.226367
YBL097W	BRN1	brn1-9	TSA	0.929157	1.09231	1.01073	0.115365	0.015401
YBL097W	BRN1	brn1-16	TSA	1.44581	1.43768	1.44174	0.00575251	0.527815
YBL098W	BNA4		DMA	1.23984	1.18966	1.21475	0.0354846	0.280656
YBL100C			DMA	1.22975	1.17942	1.20459	0.0355904	0.268538
YBL101C	ECM21		DMA	1.08205	1.12045	1.10125	0.0271514	0.139142
YBL102W	SFT2		DMA	1.14936	1.12687	1.13812	0.0159072	0.186647
YBL103C	RTG3		DMA	0.619585	0.66641	0.642998	0.0331102	-0.637115
YBL103C	RTG3		DMA	1.04758	1.00536	1.02647	0.0298573	0.0376877
YBL104C	SEA4		DMA	0.990638	0.966775	0.978706	0.016874	-0.031052
YBL105C	PKC1	pkc1-2	TSA	1.13831	1.1862	1.16226	0.0338674	0.216928	1
YBL105C	PKC1	pkc1-4	TSA	1.25641	1.11031	1.18336	0.103306	0.24289
YBL105C	PKC1	pkc1-ts	TSA	1.20049	1.27692	1.2387	0.0540453	0.308832
YBL105C	PKC1	pkc1-3	TSA	1.33152	1.33986	1.33569	0.00589772	0.417589
YBL105C	PKC1	pkc1-1	TSA	1.39623	1.30286	1.34955	0.0660216	0.432474
YBL106C	SRO77		DMA	1.01244	0.984597	0.998519	0.0196885	-0.00213889
YBL107C	MIX23		DMA	0.928218	1.05138	0.989799	0.0870879	-0.014793
YBR001C	NTH2		DMA	1.01759	1.03452	1.02606	0.0119684	0.0371089
YBR004C	GPI18	gpi18-5001	TSA	1.52045	1.33512	1.42778	0.131047	0.513775
YBR005W	RCR1		DMA	1.24778	1.25299	1.25038	0.00368488	0.322368
YBR006W	UGA2		DMA	1.11624	1.24849	1.18236	0.0935147	0.241671
YBR007C	DSF2		DMA	1.23229	1.10357	1.16793	0.0910229	0.223955
YBR008C	FLR1		DMA	1.10139	1.18034	1.14087	0.055824	0.19013
YBR009C	HHF1		DMA	0.938153	0.930501	0.934327	0.00541088	-0.0980006
YBR010W	HHT1		DMA	0.999563	0.92616	0.962861	0.051904	-0.0545999
YBR011C	IPP1	ipp1-5001	TSA	0.907573	0.591014	0.749293	0.223841	-0.416397
YBR012C			DMA	0.959123	1.05404	1.00658	0.0671175	0.00946552
YBR013C			DMA	0.991001	0.987788	0.989394	0.00227145	-0.0153824
YBR014C	GRX7		DMA	1.08667	0.970152	1.02841	0.0823889	0.0404154
YBR015C	MNN2		DMA	0.981615	0.963328	0.972471	0.0129313	-0.0402721
YBR016W			DMA	1.0655	1.17377	1.11964	0.0765627	0.163031
YBR018C	GAL7		DMA	1.15808	1.04129	1.09969	0.0825847	0.137093
YBR019C	GAL10		DMA	1.02282	1.19676	1.10979	0.122993	0.150283
YBR020W	GAL1		DMA	1.13133	1.09476	1.11305	0.0258611	0.154512
YBR020W	GAL1		DMA	1.11736	1.11276	1.11506	0.00325629	0.157119
YBR022W	POA1		DMA	0.934884	1.05735	0.996118	0.0865989	-0.00561123
YBR023C	CHS3		DMA	1.1625	1.2172	1.18985	0.0386812	0.250781
YBR024W	SCO2		DMA	0.910731	1.38765	1.14919	0.337235	0.20062
YBR025C	OLA1		DMA	1.04056	1.05644	1.0485	0.0112279	0.0683256
YBR026C	ETR1		DMA	0.864393	0.781366	0.822879	0.0587091	-0.281247
YBR026C	ETR1		TSA	0.955824	0.917643	0.936733	0.0269979	-0.0942894
YBR027C			DMA	1.29232	1.14746	1.21989	0.102429	0.286749
YBR028C	YPK3		DMA	1.07378	1.02866	1.05122	0.031904	0.0720636
YBR029C	CDS1	cds1-5001	TSA	1.29776	1.4378	1.36778	0.0990236	0.451836
YBR030W	RKM3		DMA	0.983175	0.951739	0.967457	0.0222291	-0.0477303
YBR031W	RPL4A		DMA	0.840393	0.96978	0.905087	0.0914903	-0.143872
YBR032W			DMA	1.13682	1.03705	1.08694	0.0705482	0.12027
YBR033W	EDS1		DMA	1.40227	1.09008	1.24617	0.220757	0.317505
YBR034C	HMT1		DMA	0.97545	1.24703	1.11124	0.192035	0.152169
YBR036C	CSG2		DMA	0.639511	0.69405	0.66678	0.038565	-0.584717
YBR040W	FIG1		DMA	1.2453	1.27217	1.25874	0.0190012	0.331978
YBR041W	FAT1		DMA	1.01557	0.999546	1.00756	0.0113292	0.0108619
YBR042C	CST26		DMA	1.0951	0.952885	1.02399	0.100558	0.0342024
YBR043C	QDR3		DMA	1.06456	1.01824	1.0414	0.0327521	0.0585243
YBR044C	TCM62		DMA	1.04254	0.994466	1.0185	0.0339921	0.0264482
YBR045C	GIP1		DMA	1.16259	1.03618	1.09938	0.089381	0.136695
YBR046C	ZTA1		DMA	1.0211	1.09179	1.05645	0.0499859	0.0792222
YBR047W	FMP23		DMA	1.05184	1.02506	1.03845	0.018936	0.0544301
YBR048W	RPS11B		DMA	0.875573	0.884972	0.880273	0.0066463	-0.183978
YBR049C	REB1	reb1-5001	TSA	0.307138	0.256741	0.281939	0.0356363	-1.82654
YBR050C	REG2		DMA	1.25445	1.03387	1.14416	0.155974	0.194287
YBR051W			DMA	1.10952	1.34321	1.22637	0.165245	0.29439
YBR052C	RFS1		DMA	1.10571	1.11895	1.11233	0.00936199	0.15358
YBR053C			DMA	1.11914	1.06215	1.09065	0.0402987	0.125186
YBR054W	YRO2		DMA	1.027	0.973876	1.00044	0.0375631	0.000630751
YBR055C	PRP6	prp6-ts	TSA	1.23853	1.23591	1.23722	0.00185537	0.307099
YBR055C	PRP6	prp6-1	TSA	1.99667	1.56468	1.78068	0.305461	0.832427
YBR056W			DMA	0.973843	0.897686	0.935764	0.0538514	-0.0957829
YBR057C	MUM2		DMA	0.866656	0.96559	0.916123	0.0699573	-0.126387
YBR057C	MUM2		TSA	1.27755	1.23007	1.25381	0.0335708	0.326315
YBR058C	UBP14		DMA	1.03464	1.0322	1.03342	0.00172118	0.0474253
YBR058C-A	TSC3	tsc3-2	TSA	1.1336	1.17094	1.15227	0.0264081	0.204478
YBR059C	AKL1		DMA	0.826114	0.832224	0.829169	0.00432064	-0.270262
YBR060C	ORC2	orc2-4	TSA	0.949549	0.852723	0.901136	0.0684666	-0.150183
YBR060C	ORC2	orc2-2	TSA	1.11784	1.12658	1.12221	0.00618096	0.166343
YBR060C	ORC2	orc2-1	TSA	1.09166	1.28552	1.18859	0.137077	0.249248
YBR060C	ORC2	orc2-3	TSA	1.16195	1.21671	1.18933	0.0387235	0.250147
YBR061C	TRM7		DMA	0.78095	0.781443	0.781197	0.000349153	-0.356242
YBR061C	TRM7		DMA	1.24499	1.03612	1.14055	0.147696	0.189735
YBR062C			DMA	1.17728	1.21816	1.19772	0.0289093	0.260294
YBR063C			DMA	1.36464	1.27301	1.31883	0.0647902	0.399253
YBR064W			DMA	1.23895	1.29553	1.26724	0.0400057	0.34169
YBR065C	ECM2		DMA	1.12167	1.21094	1.1663	0.0631245	0.221944
YBR066C	NRG2		DMA	1.0655	1.09051	1.078	0.0176859	0.108363
YBR067C	TIP1		DMA	1.00786	1.03119	1.01953	0.0164939	0.0279004
YBR068C	BAP2		DMA	1.14047	1.2057	1.17308	0.0461192	0.230307
YBR069C	TAT1		DMA	1.02018	1.01373	1.01695	0.00456477	0.0242531
YBR070C	ALG14	alg14-5001	TSA	1.19555	1.10886	1.15221	0.0612982	0.2044
YBR071W			DMA	0.979769	0.968741	0.974255	0.00779825	-0.0376289
YBR072W	HSP26		DMA	1.18465	1.08985	1.13725	0.0670359	0.185549
YBR073W	RDH54		DMA	1.11895	1.11226	1.11561	0.00472467	0.157827
YBR074W	PFF1		DMA	0.961511	1.17205	1.06678	0.148873	0.0932624
YBR075W			DMA	1.14306	1.13103	1.13704	0.00850587	0.185286
YBR075W			DMA	1.2098	1.34859	1.27919	0.0981419	0.355236
YBR076W	ECM8		DMA	0.910568	0.971189	0.940879	0.0428656	-0.0879196
YBR077C	SLM4		DMA	1.14098	1.1975	1.16924	0.0399643	0.225567
YBR078W	ECM33		DMA	1.23353	1.38212	1.30782	0.10507	0.387166
YBR079C	RPG1	rpg1-1	TSA	1.14761	1.18171	1.16466	0.0241123	0.219909
YBR079C	RPG1	rpg1-5001	TSA	1.17941	1.19331	1.18636	0.00982648	0.24654
YBR080C	SEC18	sec18-1	TSA	1.05026	1.06277	1.05652	0.00884787	0.079316
YBR082C	UBC4		DMA	0.985613	0.995975	0.990794	0.00732649	-0.013343
YBR082C	UBC4		DMA	1.12105	1.06708	1.09407	0.038164	0.1297
YBR082C	UBC4		TSA	1.24446	1.21469	1.22957	0.0210528	0.298158
YBR083W	TEC1		DMA	1.05983	1.06175	1.06079	0.001357	0.0851402
YBR084C-A	RPL19A		DMA	0.865133	0.83214	0.848637	0.023329	-0.236781		1
YBR084W	MIS1		DMA	1.06183	1.05184	1.05683	0.00706252	0.0797468
YBR085W	AAC3		DMA	1.09934	1.28544	1.19239	0.131588	0.253855
YBR086C	IST2		DMA	0.964333	1.12736	1.04585	0.115277	0.0646704
YBR087W	RFC5	rfc5-1	TSA	1.21639	1.19183	1.20411	0.0173659	0.267966
YBR089C-A	NHP6B		DMA	1.3267	1.25663	1.29167	0.0495487	0.369233
YBR090C			DMA	1.00527	1.0525	1.02888	0.0333985	0.0410779
YBR092C	PHO3		DMA	1.12725	1.01827	1.07276	0.0770595	0.101325
YBR093C	PHO5		DMA	0.63063	0.675077	0.652853	0.0314289	-0.615169
YBR094W	PBY1		DMA	1.05447	1.0689	1.06169	0.0102001	0.0863589
YBR095C	RXT2		DMA	0.987806	1.06215	1.02498	0.0525709	0.035595	1
YBR095C	RXT2		DMA	0.873242	0.900141	0.886692	0.0190203	-0.173495
YBR098W	MMS4		DMA	1.08951	1.03399	1.06175	0.0392601	0.0864427
YBR099C			DMA	0.975124	0.94908	0.962102	0.0184161	-0.0557381
YBR100W			DMA	0.990128	0.969041	0.979584	0.0149107	-0.0297586
YBR101C	FES1		DMA	0.923307	1.03484	0.979076	0.078869	-0.0305075
YBR102C	EXO84	exo84-102	TSA	1.00977	0.836403	0.923086	0.122588	-0.115463
YBR103W	SIF2		DMA	0.769899	0.809952	0.789926	0.0283218	-0.340211
YBR104W	YMC2		DMA	0.939787	0.923307	0.931547	0.0116531	-0.102299
YBR105C	VID24		DMA	1.2411	1.29697	1.26903	0.0395104	0.34373
YBR106W	PHO88		DMA	0.64072	0.381597	0.511159	0.183227	-0.968157
YBR107C	IML3		DMA	1.07267	1.04696	1.05982	0.0181762	0.0838146
YBR108W	AIM3		DMA	1.17059	1.23818	1.20438	0.0477956	0.268293
YBR109C	CMD1	cmd1-3	TSA	1.03404	0.982482	1.00826	0.0364564	0.0118688	1
YBR109C	CMD1	cmd1-1	TSA	1.00085	1.12912	1.06498	0.0907001	0.0908279
YBR109C	CMD1	cmd1-8	TSA	1.29624	1.14395	1.22009	0.107683	0.286992
YBR110W	ALG1	alg1-1	TSA	1.14454	1.17834	1.16144	0.0239001	0.215919
YBR111C	YSA1		DMA	1.02842	1.08085	1.05464	0.0370721	0.0767477
YBR113W			DMA	0.981487	0.935531	0.958509	0.0324962	-0.0611362
YBR114W	RAD16		DMA	1.06217	1.02454	1.04335	0.026608	0.0612293
YBR115C	LYS2		DMA	0.575352	0.515816	0.545584	0.0420986	-0.874126
YBR115C	LYS2		DMA	0.547722	0.574556	0.561139	0.0189744	-0.833571
YBR116C			DMA	1.01651	1.01427	1.01539	0.00158212	0.0220363
YBR118W	TEF2		DMA	1.0887	1.14865	1.11868	0.0423905	0.161794	1
YBR118W	TEF2		TSA	1.14339	1.18579	1.16459	0.0299814	0.219819
YBR119W	MUD1		DMA	0.981682	0.965293	0.973488	0.0115885	-0.0387654
YBR121C	GRS1		DMA	0.996958	0.932156	0.964557	0.0458221	-0.0520619
YBR121C	GRS1	grs1-5001	TSA	1.30145	1.11999	1.21072	0.128313	0.275862
YBR122C	MRPL36		DMA	1.02549	1.21438	1.11994	0.133561	0.163417
YBR123C	TFC1	tfc1-e447k	TSA	1.28319	1.43217	1.35768	0.105349	0.441143
YBR125C	PTC4		DMA	1.05258	1.09495	1.07377	0.0299655	0.10268
YBR126C	TPS1		DMA	0.853843	0.751098	0.80247	0.072652	-0.31748
YBR126C	TPS1	tps1-supp1	TSA	1.23363	1.16573	1.19968	0.0480098	0.262651
YBR128C	ATG14		DMA	1.04745	1.02674	1.0371	0.0146467	0.0525491
YBR129C	OPY1		DMA	1.03115	1.05964	1.04539	0.0201393	0.0640476
YBR130C	SHE3		DMA	1.11979	1.06423	1.09201	0.039291	0.126984
YBR131W	CCZ1		DMA	0.879683	0.963193	0.921438	0.0590503	-0.118041
YBR131W	CCZ1		TSA	1.0738	1.09196	1.08288	0.0128439	0.114874
YBR132C	AGP2		DMA	1.12287	1.13755	1.13021	0.0103831	0.176587
YBR134W			DMA	1.15615	1.08467	1.12041	0.0505435	0.164029
YBR135W	CKS1	cks1-38	TSA	0.910136	0.991011	0.950573	0.057187	-0.0731301
YBR135W	CKS1	cks1-35	TSA	1.29847	1.29579	1.29713	0.00189506	0.37532
YBR137W			DMA	1.19423	1.12845	1.16134	0.0465119	0.215788	1
YBR138C			DMA	1.17567	1.08823	1.13195	0.0618296	0.178805
YBR139W			DMA	1.03707	0.848226	0.942649	0.133534	-0.0852081
YBR141C	BMT2		DMA	1.11855	1.02311	1.07083	0.0674887	0.0987308
YBR142W	MAK5	mak5-5001	TSA	0.584126	0.651085	0.617605	0.0473475	-0.695243	1
YBR143C	SUP45	sup45-ts	TSA	0.9677	0.928094	0.947897	0.0280055	-0.0771983
YBR144C			DMA	1.03115	1.10539	1.06827	0.0524913	0.0952776
YBR145W	ADH5		DMA	1.24523	1.26205	1.25364	0.0118891	0.326123	1
YBR146W	MRPS9		DMA	1.02225	0.916746	0.969499	0.0746051	-0.0446881
YBR147W	RTC2		DMA	1.03313	0.928142	0.980635	0.0742366	-0.028212
YBR148W	YSW1		DMA	1.04046	1.11895	1.0797	0.0554974	0.110635
YBR149W	ARA1		DMA	1.02838	0.994269	1.01132	0.0241188	0.0162447
YBR150C	TBS1		DMA	1.19935	1.02195	1.11065	0.125439	0.151402
YBR151W	APD1		DMA	1.02457	0.950929	0.987751	0.0520737	-0.0177811
YBR152W	SPP381	spp381-5001	TSA	1.23757	1.29314	1.26536	0.0392984	0.339544
YBR153W	RIB7	rib7-5001	TSA	1.39518	1.39465	1.39492	0.000373691	0.48018
YBR154C	RPB5	rpb5-5001	TSA	0.722337	0.743399	0.732868	0.0148931	-0.448375
YBR154C	RPB5	rpb5-h147r	TSA	1.05485	1.20985	1.13235	0.1096	0.179323
YBR155W	CNS1	cns1-1	TSA	0.622928	0.394489	0.508709	0.161531	-0.975089
YBR156C	SLI15		DMA	0.931676	1.00412	0.967897	0.0512244	-0.047074
YBR156C	SLI15	sli15-3	TSA	1.43803	1.3842	1.41112	0.0380625	0.496837
YBR157C	ICS2		DMA	0.934136	1.31827	1.12621	0.271627	0.17147
YBR158W	AMN1		DMA	1.00914	1.2305	1.11982	0.15652	0.163268
YBR159W	IFA38		DMA	1.39779	1.25019	1.32399	0.104374	0.404891
YBR160W	CDC28	cdc28-td	TSA	0.290593	0.961002	0.625798	0.474051	-0.676232
YBR160W	CDC28	cdc28-4	TSA	0.900817	1.0508	0.975809	0.106055	-0.035329
YBR160W	CDC28	cdc28-13	TSA	1.11739	1.08196	1.09968	0.0250478	0.137077
YBR160W	CDC28	cdc28-1	TSA	1.12215	1.08174	1.10195	0.0285738	0.140057
YBR161W	CSH1		DMA	1.0655	1.04445	1.05497	0.0148847	0.077207
YBR162C	TOS1		DMA	1.22062	1.08337	1.152	0.0970564	0.204135
YBR162W-A	YSY6		DMA	1.07912	0.975396	1.02726	0.0733467	0.0388016
YBR164C	ARL1		DMA	0.983388	0.950459	0.966923	0.0232842	-0.0485264
YBR164C	ARL1		TSA	1.20668	1.1605	1.18359	0.0326498	0.243169
YBR165W	UBS1		DMA	1.09737	0.990781	1.04407	0.0753676	0.0622237
YBR165W	UBS1		DMA	1.10025	1.21848	1.15936	0.0835998	0.213334
YBR166C	TYR1		DMA	1.00821	0.924693	0.966454	0.059058	-0.0492277
YBR167C	POP7	pop7-5001	TSA	1.34017	1.12416	1.23216	0.152743	0.301192
YBR168W	PEX32		DMA	0.906122	0.920016	0.913069	0.00982485	-0.131204
YBR169C	SSE2		DMA	1.14394	1.10627	1.1251	0.0266329	0.170057
YBR170C	NPL4		DMA	0.668681	0.742016	0.705349	0.0518562	-0.503592
YBR171W	SEC66		DMA	0.979257	1.17893	1.0791	0.141192	0.109822
YBR172C	SMY2		DMA	1.03531	1.20022	1.11776	0.116607	0.160615
YBR174C			DMA	1.04455	1.02457	1.03456	0.0141277	0.0490203
YBR175W	SWD3		DMA	1.00614	1.04854	1.02734	0.0299815	0.038917
YBR175W	SWD3		TSA	1.11456	1.08011	1.09733	0.0243598	0.133999
YBR176W	ECM31		DMA	1.08386	1.20757	1.14571	0.0874716	0.196246
YBR177C	EHT1		DMA	1.13349	1.19206	1.16278	0.0414152	0.217574
YBR178W			DMA	1.0496	1.20626	1.12793	0.110775	0.173672
YBR180W	DTR1		DMA	1.13393	1.0997	1.11682	0.0242066	0.159392
YBR181C	RPS6B		DMA	0.746334	0.772619	0.759476	0.0185866	-0.396923
YBR182C	SMP1		DMA	1.0433	1.00936	1.02633	0.0239977	0.0374975
YBR183W	YPC1		DMA	1.10596	1.0559	1.08093	0.0353985	0.112273
YBR184W			DMA	1.04182	0.997488	1.01965	0.031348	0.0280806
YBR185C	MBA1		DMA	1.01021	1.04584	1.02803	0.0251974	0.0398772
YBR186W	PCH2		DMA	1.09005	1.21428	1.15217	0.0878447	0.204352
YBR187W	GDT1		DMA	1.04793	1.11057	1.07925	0.0442968	0.110027
YBR188C	NTC20		DMA	1.146	1.13424	1.14012	0.00831734	0.189188
YBR189W	RPS9B		DMA	0.573789	0.300525	0.437157	0.193227	-1.19378
YBR193C	MED8	med8-39	TSA	1.04673	1.07887	1.0628	0.0227296	0.0878686	1
YBR193C	MED8	med8-51	TSA	0.878867	0.87664	0.877753	0.00157511	-0.188112
YBR194W	AIM4		DMA	0.848725	0.788668	0.818697	0.0424665	-0.288599	1
YBR195C	MSI1		DMA	1.04104	1.06248	1.05176	0.0151598	0.0728067
YBR195C	MSI1		TSA	1.01362	1.21143	1.11253	0.139876	0.153841
YBR196C	PGI1	pgi1-2	TSA	1.32511	1.33496	1.33004	0.00696471	0.411468
YBR197C			DMA	1.03568	1.20056	1.11812	0.116587	0.161079
YBR198C	TAF5	taf5-15	TSA	0.891691	0.943313	0.917502	0.0365018	-0.124217
YBR198C	TAF5	taf5-20	TSA	1.22191	1.08844	1.15518	0.0943784	0.208115
YBR198C	TAF5	taf5-3	TSA	1.2043	1.23469	1.21949	0.0214869	0.286283
YBR199W	KTR4		DMA	0.999563	1.01288	1.00622	0.00941759	0.00894913
YBR200W	BEM1		DMA	0.713938	0.67887	0.696404	0.0247972	-0.522004		1
YBR200W	BEM1		TSA	0.890103	1.00641	0.948256	0.0822409	-0.0766516
YBR201W	DER1		DMA	1.21148	1.23163	1.22156	0.0142468	0.288721
YBR202W	MCM7	cdc47-ts	TSA	0.493377	0.659058	0.576217	0.117155	-0.795315
YBR203W	COS111		DMA	1.42729	1.28768	1.35748	0.098718	0.440932
YBR204C	LDH1		DMA	1.027	1.01779	1.02239	0.00651139	0.0319515
YBR205W	KTR3		DMA	1.1476	1.09268	1.12014	0.0388376	0.163676
YBR206W			DMA	1.03899	1.0133	1.02615	0.0181693	0.0372363
YBR207W	FTH1		DMA	1.14053	1.03959	1.09006	0.0713814	0.124407
YBR208C	DUR1,2		DMA	1.01	1.04777	1.02888	0.0267016	0.0410817
YBR209W			DMA	1.03775	1.04182	1.03979	0.00287765	0.056287
YBR210W	ERV15		DMA	1.05529	1.05274	1.05402	0.00180633	0.0758962
YBR211C	AME1	ame1-4	TSA	1.22973	1.3055	1.26762	0.0535814	0.342119
YBR212W	NGR1		DMA	1.05911	1.00302	1.03107	0.0396628	0.0441379
YBR213W	MET8		DMA	1.23895	1.26338	1.25117	0.0172748	0.323275
YBR214W	SDS24		DMA	1.24348	1.13688	1.19018	0.0753779	0.251183
YBR215W	HPC2		DMA	1.25162	1.16858	1.2101	0.0587133	0.275125
YBR216C	YBP1		DMA	1.15488	1.15335	1.15411	0.00108594	0.206785
YBR217W	ATG12		DMA	0.979731	0.988618	0.984175	0.0062842	-0.0230137
YBR218C	PYC2		DMA	1.09349	1.02842	1.06096	0.0460068	0.0853644
YBR219C			DMA	1.03089	1.05048	1.04068	0.0138517	0.0575293
YBR220C			DMA	1.01814	1.00302	1.01058	0.010693	0.0151866
YBR221C	PDB1		DMA	0.911133	0.883523	0.897328	0.0195233	-0.156292
YBR221C	PDB1		TSA	1.24531	1.18568	1.2155	0.0421662	0.281547
YBR222C	PCS60		DMA	0.907925	0.904293	0.906109	0.00256814	-0.142243
YBR223C	TDP1		DMA	0.987646	0.921681	0.954664	0.0466442	-0.0669352
YBR224W			DMA	0.904991	0.952799	0.928895	0.0338053	-0.106413
YBR225W			DMA	0.929087	1.0973	1.01319	0.118945	0.0189096
YBR226C			DMA	1.14637	1.04641	1.09639	0.0706872	0.132761
YBR227C	MCX1		DMA	1.16336	1.06866	1.11601	0.0669585	0.158349
YBR228W	SLX1		DMA	1.05296	1.12187	1.08742	0.0487211	0.120904
YBR229C	ROT2		DMA	1.1572	1.08634	1.12177	0.0501049	0.165779
YBR230C	OM14		DMA	1.15186	1.08864	1.12025	0.0447064	0.163821
YBR231C	SWC5		DMA	0.785728	0.800579	0.793154	0.0105009	-0.334328
YBR232C			DMA	1.13782	0.992795	1.06531	0.102547	0.0912696
YBR233W	PBP2		DMA	1.07932	1.01218	1.04575	0.0474777	0.0645418
YBR234C	ARC40	arc40-5001	TSA	1.40722	1.21106	1.30914	0.138705	0.388618
YBR235W	VHC1		DMA	1.06271	1.04868	1.0557	0.00992072	0.0781992
YBR236C	ABD1	abd1-5	TSA	1.08319	0.836034	0.95961	0.174763	-0.0594794
YBR236C	ABD1	abd1-8	TSA	1.2198	1.17701	1.19841	0.0302614	0.261118
YBR237W	PRP5	prp5-1	TSA	0.993307	1.03614	1.01472	0.0302878	0.0210867
YBR238C			DMA	0.984896	0.919203	0.952049	0.0464519	-0.070892
YBR239C	ERT1		DMA	1.1973	1.12941	1.16335	0.0480042	0.218288
YBR240C	THI2		DMA	1.15447	1.14502	1.14974	0.00668484	0.20131
YBR241C			DMA	1.17528	1.06823	1.12175	0.0757024	0.165757
YBR242W			DMA	1.31109	1.34405	1.32757	0.0233022	0.40879
YBR244W	GPX2		DMA	1.1307	1.02793	1.07931	0.0726728	0.110113
YBR245C	ISW1		DMA	0.905489	0.97765	0.941569	0.0510255	-0.0868611
YBR246W	RRT2		DMA	1.09377	1.03367	1.06372	0.0424989	0.0891197
YBR247C	ENP1	enp1-1	TSA	1.17739	1.13785	1.15762	0.0279634	0.211159	1
YBR248C	HIS7		DMA	0.60123	0.554487	0.577858	0.0330524	-0.791212
YBR249C	ARO4		DMA	0.994554	1.019	1.00678	0.0172843	0.00974324
YBR250W	SPO23		DMA	1.12963	0.979777	1.0547	0.105963	0.0768376
YBR253W	SRB6	srb6-5001	TSA	1.21035	1.19251	1.20143	0.0126125	0.264755
YBR254C	TRS20	trs20-5001	TSA	0.9039	0.897535	0.900717	0.00450108	-0.150854
YBR255W	MTC4		DMA	1.09484	1.17212	1.13348	0.0546396	0.180759
YBR257W	POP4	pop4-5001	TSA	0.424395	0.400021	0.412208	0.0172352	-1.27856	1
YBR258C	SHG1		DMA	1.32587	1.21559	1.27073	0.0779792	0.345654
YBR259W			DMA	1.06771	1.04087	1.05429	0.0189822	0.0762739
YBR260C	RGD1		DMA	1.18114	1.11512	1.14813	0.0466817	0.199283
YBR261C	TAE1		DMA	1.23449	0.283309	0.7589	0.672587	-0.398019
YBR262C	MIC12		DMA	1.00602	1.08828	1.04715	0.0581668	0.0664647
YBR263W	SHM1		DMA	1.05562	1.10484	1.08023	0.0348066	0.111342
YBR264C	YPT10		DMA	0.951039	0.983058	0.967049	0.0226411	-0.0483394
YBR265W	TSC10	tsc10-1	TSA	1.39781	1.30603	1.35192	0.0649035	0.435009
YBR266C	SLM6		DMA	0.716573	0.695925	0.706249	0.0146006	-0.501751
YBR267W	REI1		DMA	0.488877	0.540907	0.514892	0.0367908	-0.957659
YBR269C	SDH8		DMA	1.10121	1.06896	1.08509	0.0228009	0.117809
YBR270C	BIT2		DMA	1.13191	1.11997	1.12594	0.00844037	0.17113
YBR271W	EFM2		DMA	1.22148	0.829334	1.02541	0.277293	0.0361995
YBR272C	HSM3		DMA	1.06534	1.20425	1.1348	0.0982183	0.182433
YBR273C	UBX7		DMA	1.24467	1.15591	1.20029	0.0627662	0.263384
YBR274W	CHK1		DMA	1.11189	1.29002	1.20095	0.12596	0.264179
YBR275C	RIF1		DMA	0.931221	1.08111	1.00616	0.105986	0.00886603
YBR276C	PPS1		DMA	0.963078	1.02765	0.995362	0.0456568	-0.00670707
YBR277C			DMA	1.0113	1.04928	1.03029	0.0268576	0.0430532
YBR278W	DPB3		DMA	1.02283	1.01744	1.02014	0.003818	0.0287602
YBR280C	SAF1		DMA	1.01153	1.00244	1.00698	0.00642983	0.0100381
YBR281C	DUG2		DMA	1.03851	1.07192	1.05522	0.0236277	0.0775393
YBR283C	SSH1		DMA	1.10543	1.21429	1.15986	0.0769769	0.213946
YBR284W			DMA	1.13774	1.24409	1.19091	0.0751992	0.252066
YBR285W			DMA	1.26951	1.37863	1.32407	0.0771582	0.40498
YBR286W	APE3		DMA	1.11086	1.26038	1.18562	0.105727	0.245647
YBR287W			DMA	1.10893	1.13704	1.12298	0.0198747	0.167336
YBR288C	APM3		DMA	0.948167	0.992861	0.970514	0.0316029	-0.0431791
YBR289W	SNF5		DMA	0.638988	0.668718	0.653853	0.021022	-0.612962
YBR290W	BSD2		DMA	1.02089	1.09263	1.05676	0.0507282	0.0796493
YBR291C	CTP1		DMA	0.933795	0.961177	0.947486	0.019362	-0.0778238
YBR292C			DMA	0.974659	0.987155	0.980907	0.00883574	-0.0278122
YBR293W	VBA2		DMA	1.06719	1.05372	1.06046	0.00952749	0.0846863
YBR294W	SUL1		DMA	0.947212	0.775869	0.86154	0.121158	-0.21501
YBR295W	PCA1		DMA	1.28439	1.36302	1.3237	0.0556005	0.404577
YBR296C	PHO89		DMA	1.17033	1.31026	1.24029	0.0989516	0.310683
YBR297W	MAL33		DMA	1.10414	1.21496	1.15955	0.0783605	0.213565
YBR298C	MAL31		DMA	1.06749	1.04912	1.05831	0.0129871	0.0817557
YBR299W	MAL32		DMA	1.16872	1.23232	1.20052	0.0449713	0.263659
YBR300C			DMA	1.07898	1.09328	1.08613	0.0101128	0.119202
YBR301W	PAU24		DMA	0.99169	1.00639	0.999042	0.0103978	-0.00138268
YCL001W	RER1		DMA	1.03157	1.03531	1.03344	0.00264394	0.047453
YCL001W-A			DMA	1.09168	0.99545	1.04356	0.0680426	0.0615182
YCL002C			DMA	1.03969	0.993066	1.01638	0.0329699	0.0234383
YCL004W	PGS1	pgs1-5006	TSA	1.03697	0.645802	0.841385	0.276597	-0.249162
YCL006C			DMA	1.02748	1.0388	1.03314	0.00800611	0.0470333
YCL009C	ILV6		DMA	1.22219	1.1661	1.19414	0.0396636	0.255978
YCL010C	SGF29		DMA	1.07932	0.951623	1.01547	0.0902985	0.0221531
YCL010C	SGF29		TSA	1.22203	1.1917	1.20687	0.0214529	0.271265
YCL011C	GBP2		DMA	1.07081	1.07892	1.07486	0.00573216	0.104155
YCL012W			DMA	1.09467	1.04555	1.07011	0.0347308	0.0977564
YCL013W			DMA	1.05066	1.07341	1.06203	0.0160903	0.0868289
YCL014W	BUD3		DMA	1.08479	1.04029	1.06254	0.0314646	0.0875122
YCL016C	DCC1		DMA	0.923575	0.943141	0.933358	0.0138354	-0.0994973
YCL016C	DCC1		TSA	1.12718	1.14108	1.13413	0.00982327	0.181585
YCL022C			DMA	0.979308	0.94925	0.964279	0.0212536	-0.0524775
YCL023C			DMA	0.93674	1.04831	0.992523	0.0788891	-0.010828
YCL024W	KCC4		DMA	0.918283	0.975462	0.946873	0.0404317	-0.0787574
YCL025C	AGP1		DMA	1.00024	0.938285	0.969262	0.0438078	-0.045041		1
YCL026C			DMA	0.961087	1.24044	1.10076	0.19753	0.138503
YCL026C-A	FRM2		DMA	1.11371	1.41319	1.26345	0.211762	0.33737
YCL027W	FUS1		DMA	1.6837	1.39516	1.53943	0.204032	0.622395
YCL028W	RNQ1		DMA	1.28475	1.1793	1.23203	0.074567	0.301032
YCL029C	BIK1		DMA	1.18051	1.18121	1.18086	0.000492042	0.239841
YCL030C	HIS4		DMA	0.523574	0.556143	0.539859	0.0230303	-0.889347
YCL032W	STE50		DMA	1.0362	1.06512	1.05066	0.0204506	0.071294	1
YCL032W	STE50		TSA	1.13897	1.20973	1.17435	0.0500325	0.231861
YCL033C	MXR2		DMA	1.22586	1.15017	1.18802	0.0535235	0.248556
YCL034W	LSB5		DMA	1.12139	1.19541	1.1584	0.0523411	0.212133
YCL035C	GRX1		DMA	1.11997	1.23168	1.17583	0.078989	0.233674
YCL036W	GFD2		DMA	0.970232	1.08854	1.02938	0.083655	0.0417826
YCL037C	SRO9		DMA	0.722986	0.831288	0.777137	0.0765808	-0.363759
YCL038C	ATG22		DMA	1.00443	1.0863	1.04537	0.0578897	0.0640093
YCL039W	GID7		DMA	1.18618	1.16336	1.17477	0.0161371	0.232375
YCL040W	GLK1		DMA	1.30744	1.26387	1.28566	0.0308071	0.362504
YCL042W			DMA	1.16005	1.15931	1.15968	0.000522336	0.213723
YCL044C	MGR1		DMA	1.06403	1.0331	1.04856	0.0218712	0.0684133	1
YCL045C	EMC1		DMA	1.03466	1.00046	1.01756	0.0241874	0.0251161
YCL046W			DMA	1.06052	1.03553	1.04802	0.0176662	0.0676711
YCL047C	POF1		DMA	1.05296	1.17855	1.11576	0.0888046	0.158026
YCL048W	SPS22		DMA	1.10146	1.1267	1.11408	0.0178497	0.155851
YCL049C			DMA	1.08574	1.03589	1.06081	0.0352537	0.0851715
YCL050C	APA1		DMA	1.31121	0.981083	1.14615	0.233435	0.196792
YCL051W	LRE1		DMA	1.31106	1.54925	1.43016	0.168423	0.516174
YCL052C	PBN1	pbn1-5001	TSA	1.10781	1.08078	1.0943	0.0191082	0.130003		1
YCL055W	KAR4		DMA	1.07258	0.955981	1.01428	0.0824487	0.0204578
YCL056C	PEX34		DMA	1.20986	1.16336	1.18661	0.032883	0.246844
YCL057W	PRD1		DMA	1.08859	1.23341	1.161	0.102401	0.215368
YCL059C	KRR1	krr1-18	TSA	1.1094	1.14249	1.12594	0.0234047	0.171136
YCL059C	KRR1	krr1-17	TSA	1.2155	1.11715	1.16632	0.0695429	0.221966
YCL060C			DMA	1.00548	0.975808	0.990646	0.0209839	-0.0135588
YCL061C	MRC1		DMA	0.874733	0.878846	0.876789	0.00290845	-0.189698
YCL061C	MRC1		TSA	1.09487	1.17556	1.13522	0.0570547	0.182966
YCL061C	MRC1		TSA	1.18254	1.15478	1.16866	0.0196247	0.224857
YCL061C	MRC1		TSA	1.20322	1.19163	1.19742	0.0081973	0.259935
YCL061C	MRC1		TSA	1.16253	1.23757	1.20005	0.0530566	0.263093
YCL062W			DMA	0.980634	0.931696	0.956165	0.0346044	-0.0646679
YCL063W	VAC17		DMA	1.0211	0.900779	0.96094	0.0850806	-0.0574823
YCL064C	CHA1		DMA	1.09625	1.03851	1.06738	0.0408267	0.0940715
YCL069W	VBA3		DMA	0.978098	0.942954	0.960526	0.0248509	-0.0581037
YCL074W			DMA	1.01295	1.13287	1.07291	0.0847965	0.101526
YCL075W			DMA	1.12694	1.14019	1.13357	0.00937233	0.180868
YCL076W			DMA	1.36906	1.14428	1.25667	0.158947	0.329604
YCR001W			DMA	1.20902	1.2852	1.24711	0.0538675	0.318592
YCR002C	CDC10	cdc10-5	TSA	0.718184	0.85412	0.786152	0.0961215	-0.34712
YCR002C	CDC10	cdc10-1	TSA	1.30805	1.288	1.29802	0.0141831	0.376318
YCR002C	CDC10	cdc10-4	TSA	1.35155	1.40435	1.37795	0.0373337	0.462523
YCR002C	CDC10	cdc10-2	TSA	1.49961	1.48202	1.49082	0.0124365	0.576103
YCR005C	CIT2		DMA	1.11161	1.13511	1.12336	0.0166173	0.167816
YCR006C			DMA	1.89339	1.95581	1.9246	0.0441373	0.944562
YCR007C			DMA	1.14904	1.02491	1.08698	0.0877721	0.120324
YCR008W	SAT4		DMA	0.98567	1.03644	1.01106	0.0359011	0.0158629
YCR009C	RVS161		DMA	0.877471	0.895959	0.886715	0.013073	-0.173458
YCR010C	ADY2		DMA	1.23456	1.06018	1.14737	0.123304	0.198326
YCR011C	ADP1		DMA	1.15059	1.07233	1.11146	0.0553413	0.152454
YCR014C	POL4		DMA	1.26662	1.16838	1.2175	0.0694637	0.283922
YCR015C	CTO1		DMA	1.17814	1.51324	1.34569	0.236952	0.428349
YCR016W			DMA	1.15751	1.22946	1.19349	0.0508704	0.255181
YCR017C	CWH43		DMA	1.6778	1.37045	1.52413	0.217328	0.607983
YCR019W	MAK32		DMA	1.27489	1.27228	1.27359	0.00184423	0.348896
YCR020C	PET18		DMA	1.15252	1.19946	1.17599	0.0331939	0.233872
YCR020C-A	MAK31		DMA	1.1007	1.10838	1.10454	0.00543531	0.143447
YCR021C	HSP30		DMA	1.23516	1.19852	1.21684	0.0259064	0.28314
YCR022C			DMA	1.16466	1.27563	1.22015	0.0784669	0.287056
YCR023C			DMA	1.07638	1.07019	1.07328	0.00438026	0.102031
YCR024C-A	PMP1		DMA	1.06906	1.07062	1.06984	0.00110195	0.0973915
YCR025C			DMA	1.49875	1.26356	1.38115	0.166303	0.465872
YCR026C	NPP1		DMA	1.73225	1.32044	1.52635	0.291198	0.610082
YCR027C	RHB1		DMA	1.35358	1.37635	1.36497	0.0160997	0.448866
YCR028C-A	RIM1		DMA	0.868425	0.855994	0.862209	0.00878967	-0.21389
YCR030C	SYP1		DMA	1.27906	1.31138	1.29522	0.022856	0.373201
YCR031C	RPS14A		DMA	0.925254	0.950711	0.937982	0.0180007	-0.0923676
YCR032W	BPH1		DMA	1.19958	1.20584	1.20271	0.0044234	0.266286
YCR033W	SNT1		DMA	0.864447	0.754411	0.809429	0.0778074	-0.305024
YCR034W	ELO2		DMA	0.922012	0.915814	0.918913	0.00438293	-0.122
YCR036W	RBK1		DMA	1.00555	1.12499	1.06527	0.0844607	0.0912211
YCR037C	PHO87		DMA	0.999975	1.03174	1.01586	0.0224584	0.0226948
YCR042C	TAF2	taf2-1	TSA	1.04838	1.0202	1.03429	0.0199263	0.0486413
YCR043C			DMA	1.44197	1.40006	1.42102	0.0296349	0.506926
YCR044C	PER1		DMA	1.071	1.17405	1.12252	0.0728702	0.166744
YCR045C	RRT12		DMA	1.33511	1.32341	1.32926	0.00827222	0.410627
YCR048W	ARE1		DMA	1.17256	1.1821	1.17733	0.00674781	0.235519
YCR049C			DMA	1.16259	1.13412	1.14836	0.0201301	0.19957
YCR050C			DMA	1.06845	1.08305	1.07575	0.0103237	0.105342
YCR051W			DMA	1.10606	1.06812	1.08709	0.0268277	0.120465
YCR052W	RSC6	rsc6-5001	TSA	1.33903	1.33278	1.33591	0.00442004	0.417821
YCR053W	THR4		DMA	0.72674	0.774537	0.750638	0.0337977	-0.413811
YCR059C	YIH1		DMA	1.06658	1.08927	1.07793	0.0160465	0.10826
YCR060W	TAH1		DMA	1.00997	1.04585	1.02791	0.0253711	0.0397142
YCR061W			DMA	1.01383	1.02789	1.02086	0.00994182	0.0297911
YCR062W			DMA	1.07657	1.13227	1.10442	0.0393888	0.143288
YCR063W	BUD31		DMA	0.645948	0.610087	0.628017	0.0253577	-0.671123		1
YCR065W	HCM1		DMA	1.17779	1.03629	1.10704	0.100057	0.146707
YCR067C	SED4		DMA	1.20662	1.36594	1.28628	0.112652	0.363204
YCR068W	ATG15		DMA	1.63121	1.27519	1.4532	0.251745	0.539235
YCR069W	CPR4		DMA	1.10194	1.28614	1.19404	0.130252	0.255853
YCR071C	IMG2		DMA	0.684512	0.717931	0.701221	0.0236307	-0.512059	1
YCR073C	SSK22		DMA	1.24987	1.21175	1.23081	0.0269547	0.299602
YCR073W-A	SOL2		DMA	1.20139	1.12547	1.16343	0.0536791	0.218386
YCR075C	ERS1		DMA	1.20686	1.14667	1.17677	0.0425596	0.234827
YCR076C	FUB1		DMA	1.10946	1.07779	1.09362	0.0223943	0.129114
YCR077C	PAT1		DMA	0.842907	0.866405	0.854656	0.0166159	-0.226584
YCR077C	PAT1		TSA	1.03942	1.10508	1.07225	0.0464288	0.100643
YCR079W	PTC6		DMA	1.11917	1.05352	1.08634	0.0464225	0.11948
YCR081W	SRB8		DMA	0.806063	0.855115	0.830589	0.034685	-0.267794	1
YCR082W	AHC2		DMA	1.12201	1.17113	1.14657	0.0347342	0.197328
YCR083W	TRX3		DMA	1.14349	1.3341	1.23879	0.134778	0.308936
YCR085W			DMA	1.21937	1.33865	1.27901	0.0843457	0.355025
YCR086W	CSM1		DMA	0.968529	0.930422	0.949475	0.026946	-0.0747977
YCR087C-A			DMA	1.31763	1.11102	1.21433	0.146098	0.280155
YCR087W			DMA	1.16564	1.09283	1.12924	0.0514878	0.175348
YCR088W	ABP1		DMA	1.01422	0.998906	1.00656	0.0108279	0.00943728
YCR089W	FIG2		DMA	1.1404	1.13542	1.13791	0.00351951	0.186382
YCR090C			DMA	1.05539	1.31991	1.18765	0.187046	0.248113
YCR091W	KIN82		DMA	1.178	0.990797	1.0844	0.132371	0.116894
YCR092C	MSH3		DMA	1.05487	1.0445	1.04969	0.00732621	0.0699566
YCR093W	CDC39	cdc39-1	TSA	1.30082	1.42903	1.36493	0.0906609	0.448823
YCR095C	OCA4		DMA	1.1979	1.12274	1.16032	0.0531432	0.21452
YCR098C	GIT1		DMA	1.18808	1.2852	1.23664	0.0686767	0.306427
YCR099C			DMA	1.20675	1.20339	1.20507	0.00237719	0.269116
YCR100C			DMA	1.1405	1.0755	1.108	0.0459618	0.147957
YCR101C			DMA	1.18791	1.06691	1.12741	0.0855601	0.173014
YCR102C			DMA	1.16165	1.08374	1.12269	0.0550891	0.166962
YCR102W-A			DMA	1.01187	1.10241	1.05714	0.0640189	0.0801636
YCR105W	ADH7		DMA	1.11117	1.13259	1.12188	0.0151465	0.165917
YCR106W	RDS1		DMA	1.04065	1.12818	1.08441	0.0618937	0.116912
YCR107W	AAD3		DMA	1.02564	1.047	1.03632	0.0151061	0.0514728
YDL001W	RMD1		DMA	1.02921	1.05552	1.04237	0.0186039	0.0598657
YDL002C	NHP10		DMA	0.912473	0.966151	0.939312	0.0379563	-0.0903235
YDL002C	NHP10		TSA	1.07826	1.06467	1.07146	0.00960734	0.0995834
YDL003W	MCD1	mcd1-5001	TSA	0.72732	0.720752	0.724036	0.00464428	-0.465868
YDL003W	MCD1	mcd1-73	TSA	1.42242	1.30775	1.36509	0.081081	0.448992
YDL006W	PTC1		DMA	0.798457	0.900262	0.849359	0.0719873	-0.235553
YDL007W	RPT2	rpt2-rf	TSA	1.32816	1.33116	1.32966	0.0021251	0.411058
YDL008W	APC11	apc11-13	TSA	1.1935	1.11148	1.15249	0.057997	0.204757	1
YDL008W	APC11	apc11-22	TSA	1.00859	1.00402	1.0063	0.00322914	0.00906748
YDL010W	GRX6		DMA	1.04537	1.07781	1.06159	0.0229364	0.0862309
YDL011C			DMA	1.07311	0.909379	0.991243	0.115774	-0.0126893
YDL012C			DMA	1.03804	1.11421	1.07613	0.053864	0.105848
YDL013W	SLX5		DMA	0.695925	0.696379	0.696152	0.000321131	-0.522526
YDL014W	NOP1	nop1-2	TSA	0.225346	0.533226	0.379286	0.217704	-1.39864
YDL014W	NOP1	nop1-3	TSA	1.19022	1.28709	1.23865	0.0685025	0.308774
YDL015C	TSC13	tsc13-5001	TSA	0.530974	0.581421	0.556197	0.0356713	-0.846332
YDL017W	CDC7	cdc7-1	TSA	1.15726	1.18061	1.16893	0.0165138	0.225193
YDL017W	CDC7	cdc7-4	TSA	1.22078	1.286	1.25339	0.0461124	0.325837
YDL018C	ERP3		DMA	1.01049	1.06349	1.03699	0.0374765	0.0524084
YDL019C	OSH2		DMA	0.995027	0.984001	0.989514	0.00779648	-0.0152085
YDL020C	RPN4		DMA	0.880348	0.912746	0.896547	0.022909	-0.157549
YDL020C	RPN4		TSA	1.06046	1.0582	1.05933	0.0016013	0.0831523
YDL023C			DMA	1.08894	1.25578	1.17236	0.117974	0.22941
YDL024C	DIA3		DMA	1.23478	1.25502	1.2449	0.0143149	0.316028
YDL025C	RTK1		DMA	1.16053	1.28953	1.22503	0.0912171	0.292812
YDL026W			DMA	1.44398	1.21297	1.32848	0.163346	0.409774
YDL027C	MRX9		DMA	1.1499	1.11086	1.13038	0.0276012	0.17681
YDL028C	MPS1	mps1-1	TSA	0.360162	0.16632	0.263241	0.137067	-1.92554
YDL028C	MPS1	mps1-6	TSA	0.408221	0.303097	0.355659	0.0743344	-1.49143
YDL028C	MPS1	mps1-417	TSA	1.2743	1.28689	1.28059	0.00890609	0.356813
YDL028C	MPS1	mps1-3796	TSA	1.84004	1.36833	1.60418	0.333551	0.68184
YDL029W	ARP2	arp2-14	TSA	1.13488	0.963681	1.04928	0.121056	0.0694002
YDL030W	PRP9	prp9-ts	TSA	0.738828	0.710498	0.724663	0.0200325	-0.464617
YDL030W	PRP9	prp9-1	TSA	0.849546	1.41397	1.13176	0.399106	0.178564
YDL033C	SLM3		DMA	0.778601	0.713957	0.746279	0.0457102	-0.422213
YDL033C	SLM3		TSA	0.944098	0.95024	0.947169	0.00434331	-0.0783063
YDL034W			DMA	1.12818	1.03824	1.08321	0.0635962	0.115309
YDL035C	GPR1		DMA	1.00573	1.0211	1.01341	0.0108714	0.0192229
YDL036C	PUS9		DMA	1.0846	1.019	1.0518	0.0463867	0.0728585
YDL037C	BSC1		DMA	1.07044	1.08628	1.07836	0.0111977	0.108838
YDL038C			DMA	1.09072	1.0856	1.08816	0.00361801	0.121894
YDL039C	PRM7		DMA	1.28391	1.37271	1.32831	0.0627959	0.409592
YDL040C	NAT1		DMA	1.19276	1.16783	1.1803	0.0176267	0.239151
YDL041W			DMA	0.270984	0.30374	0.287362	0.0231622	-1.79906
YDL042C	SIR2		DMA	0.332749	0.32814	0.330444	0.00325885	-1.59752
YDL043C	PRP11	prp11-ts	TSA	1.1094	1.06637	1.08788	0.0304201	0.121526
YDL045C	FAD1	fad1-5001	TSA	1.21803	1.16364	1.19083	0.0384556	0.251972
YDL046W	NPC2		DMA	1.17677	1.15878	1.16778	0.0127211	0.223763
YDL048C	STP4		DMA	1.07081	1.03361	1.05221	0.0263064	0.073423
YDL050C			DMA	1.17256	1.17574	1.17415	0.00225014	0.231617
YDL051W	LHP1		DMA	1.21111	1.11895	1.16503	0.0651636	0.22037
YDL052C	SLC1		DMA	1.11357	0.997301	1.05543	0.0822122	0.0778368
YDL053C	PBP4		DMA	0.964548	0.972152	0.96835	0.00537701	-0.0463994
YDL054C	MCH1		DMA	1.08136	1.04522	1.06329	0.0255562	0.0885397
YDL056W	MBP1		DMA	1.06988	1.30903	1.18945	0.169106	0.250298
YDL058W	USO1	uso1-1	TSA	1.17849	1.13186	1.15517	0.0329754	0.20811
YDL059C	RAD59		DMA	1.27167	1.25367	1.26267	0.0127224	0.336479
YDL061C	RPS29B		DMA	0.807017	0.829142	0.818079	0.0156447	-0.289687	1
YDL062W			DMA	0.788264	0.881858	0.835061	0.0661811	-0.260047
YDL064W	UBC9	ubc9-2	TSA	1.21424	1.22889	1.22156	0.0103545	0.288729
YDL065C	PEX19		DMA	0.993442	1.01153	1.00249	0.0127891	0.00358126
YDL065C	PEX19		TSA	1.23591	1.18205	1.20898	0.0380854	0.27379
YDL066W	IDP1		DMA	1.03457	1.05133	1.04295	0.0118528	0.060675
YDL070W	BDF2		DMA	0.931469	0.8698	0.900635	0.0436061	-0.150986
YDL071C			DMA	1.03216	0.942573	0.987367	0.0633484	-0.018341
YDL074C	BRE1		DMA	0.713299	0.664086	0.688692	0.0347988	-0.538069
YDL074C	BRE1		DMA	0.750722	0.760239	0.75548	0.00673006	-0.404534
YDL076C	RXT3		DMA	0.973815	0.91701	0.945412	0.0401668	-0.0809844
YDL077C	VAM6		DMA	0.773271	0.776506	0.774889	0.0022878	-0.367939
YDL077C	VAM6		TSA	0.927233	0.841983	0.884608	0.0602806	-0.17689
YDL078C	MDH3		DMA	0.113629	0.143586	0.128608	0.0211827	-2.95895
YDL079C	MRK1		DMA	1.10367	1.06868	1.08618	0.0247441	0.11926
YDL080C	THI3		DMA	0.984994	1.02629	1.00564	0.0292024	0.00811915
YDL081C	RPP1A		DMA	0.653243	0.73859	0.695917	0.06035	-0.523014
YDL082W	RPL13A		DMA	0.901969	0.882029	0.891999	0.0140994	-0.164886
YDL083C	RPS16B		DMA	0.724408	0.70666	0.715534	0.0125498	-0.482908
YDL084W	SUB2	sub2-1	TSA	1.14919	1.23718	1.19319	0.062218	0.254822
YDL085W	NDE2		DMA	1.11819	1.20686	1.16253	0.062697	0.217263
YDL086W			DMA	1.19508	1.04193	1.11851	0.108296	0.161573
YDL087C	LUC7	luc7-1	TSA	1.40847	1.25355	1.33101	0.109546	0.412524
YDL088C	ASM4		DMA	1.08037	1.12684	1.1036	0.032854	0.142222
YDL089W	NUR1		DMA	1.01461	1.16421	1.08941	0.105783	0.123549
YDL090C	RAM1		DMA	0.388678	0.293942	0.34131	0.0669888	-1.55085
YDL090C	RAM1	ram1-119	TSA	0.940219	0.611258	0.775738	0.232611	-0.366358
YDL091C	UBX3		DMA	1.44824	0.990384	1.21931	0.323753	0.286067
YDL093W	PMT5		DMA	1.46198	1.24068	1.35133	0.156484	0.434377
YDL094C			DMA	1.15253	1.40167	1.2771	0.176174	0.352871
YDL095W	PMT1		DMA	1.27979	1.15892	1.21936	0.085465	0.28612
YDL096C	OPI6		DMA	1.18587	1.28967	1.23777	0.0733943	0.307746
YDL097C	RPN6	rpn6-5001	TSA	1.16215	1.13028	1.14622	0.0225336	0.196878
YDL097C	RPN6	rpn6-1	TSA	1.08555	1.33653	1.21104	0.177471	0.276244
YDL098C	SNU23	snu23-5001	TSA	1.22238	1.13074	1.17656	0.0647972	0.234575
YDL099W	BUG1		DMA	1.05626	0.966801	1.01153	0.0632539	0.0165364
YDL100C	GET3		DMA	1.05819	0.987155	1.02267	0.05023	0.0323442
YDL102W	POL3	cdc2-7	TSA	1.00751	1.085	1.04625	0.0547923	0.065234		1
YDL102W	POL3	cdc2-1	TSA	1.18166	1.07858	1.13012	0.0728903	0.176476
YDL102W	POL3	cdc2-2	TSA	1.23271	1.36022	1.29646	0.090165	0.374582
YDL103C	QRI1	qri1-5001	TSA	0.751295	0.72431	0.737803	0.0190814	-0.438693
YDL103C	QRI1	qri1-ts6	TSA	1.12913	1.03424	1.08169	0.0670984	0.113282
YDL103C	QRI1	qri1-ts1	TSA	1.29276	1.35854	1.32565	0.0465141	0.406705
YDL104C	QRI7		DMA	0.997656	0.943624	0.97064	0.0382063	-0.0429915
YDL105W	NSE4	nse4-5001	TSA	0.508476	0.500049	0.504262	0.00595839	-0.987753		1
YDL105W	NSE4	nse4-ts2	TSA	0.667927	0.656818	0.662372	0.00785523	-0.594285		1
YDL105W	NSE4	nse4-ts4	TSA	1.02617	0.995752	1.01096	0.0215067	0.0157248
YDL105W	NSE4	nse4-ts1	TSA	0.99693	1.06436	1.03064	0.0476769	0.0435448
YDL105W	NSE4	nse4-ts3	TSA	1.14019	1.05788	1.09903	0.0582021	0.136231
YDL106C	PHO2		DMA	0.999792	0.943475	0.971634	0.0398223	-0.0415155
YDL108W	KIN28	kin28-ts	TSA	0.558568	0.684399	0.621484	0.0889761	-0.686212	1
YDL109C			DMA	1.00299	1.02589	1.01444	0.0161938	0.0206863
YDL110C	TMA17		DMA	1.10243	1.09363	1.09803	0.006228	0.134916
YDL111C	RRP42	rrp42-5001	TSA	0.999397	1.05631	1.02785	0.0402405	0.0396319
YDL112W	TRM3		DMA	0.974024	1.25164	1.11283	0.196302	0.154234
YDL113C	ATG20		DMA	1.00476	1.11069	1.05772	0.0748997	0.0809624
YDL114W			DMA	1.2906	1.22864	1.25962	0.0438126	0.332987
YDL117W	CYK3		DMA	0.836045	0.867707	0.851876	0.0223887	-0.231284
YDL118W			DMA	0.962814	1.01507	0.988941	0.03695	-0.0160432
YDL119C	HEM25		DMA	1.0362	1.07822	1.05721	0.0297144	0.0802608
YDL121C			DMA	0.99643	1.08393	1.04018	0.0618751	0.0568361
YDL122W	UBP1		DMA	1.04048	1.03378	1.03713	0.00473607	0.052597
YDL123W	SNA4		DMA	1.14703	1.03883	1.09293	0.0765067	0.1282
YDL124W			DMA	1.19063	1.1794	1.18501	0.00794471	0.244904
YDL125C	HNT1		DMA	1.062	1.02699	1.0445	0.0247546	0.0628111
YDL126C	CDC48	cdc48-1	TSA	0.227198	0.336283	0.28174	0.0771344	-1.82756
YDL126C	CDC48	cdc48-4601	TSA	0.706998	0.778151	0.742575	0.050313	-0.429392
YDL126C	CDC48	cdc48-9	TSA	1.18803	1.17221	1.18012	0.0111843	0.238936
YDL126C	CDC48	cdc48-3	TSA	1.16468	1.21906	1.19187	0.0384534	0.253227
YDL126C	CDC48	cdc48-2	TSA	1.15025	1.2743	1.21228	0.0877109	0.277717
YDL127W	PCL2		DMA	1.01316	1.03542	1.02429	0.0157355	0.0346224
YDL128W	VCX1		DMA	1.00859	0.894652	0.951619	0.0805643	-0.0715433
YDL129W			DMA	1.25441	1.37276	1.31358	0.0836901	0.393508
YDL130W	RPP1B		DMA	0.954029	0.921344	0.937686	0.0231113	-0.0928226
YDL130W-A	STF1		DMA	1.19981	1.41825	1.30903	0.154461	0.388495
YDL131W	LYS21		DMA	1.01934	0.993907	1.00663	0.0179872	0.00952702
YDL132W	CDC53	cdc53-1	TSA	0.790194	0.737557	0.763875	0.0372195	-0.388591
YDL132W	CDC53	cdc53-1	TSA	0.844895	0.781411	0.813153	0.04489	-0.298401
YDL133C-A	RPL41B		DMA	0.990101	1.022	1.00605	0.0225525	0.00869952
YDL133C-A	RPL41B		DMA	1.14093	1.07221	1.10657	0.0485943	0.146096
YDL133W	SRF1		DMA	1.04812	1.16547	1.1068	0.0829788	0.14639
YDL134C	PPH21		DMA	1.08436	1.08889	1.08663	0.00320374	0.11986
YDL135C	RDI1		DMA	1.04622	1.10034	1.07328	0.0382725	0.102024
YDL136W	RPL35B		DMA	0.92403	0.989604	0.956817	0.0463676	-0.0636848
YDL137W	ARF2		DMA	1.02333	1.08793	1.05563	0.0456799	0.0781091
YDL138W	RGT2		DMA	1.21898	1.10771	1.16335	0.0786756	0.21828
YDL140C	RPO21	rpo21-1	TSA	0.647769	0.718619	0.683194	0.0500984	-0.549632
YDL142C	CRD1		DMA	1.15242	1.10391	1.12817	0.0343018	0.173984
YDL143W	CCT4	cct4-1	TSA	0.78872	0.704908	0.746814	0.0592636	-0.421179
YDL144C			DMA	1.03502	1.12676	1.08089	0.0648701	0.112226
YDL145C	COP1	cop1-1	TSA	1.22484	1.30795	1.26639	0.0587639	0.340727
YDL146W	LDB17		DMA	1.01934	1.05365	1.0365	0.0242555	0.051714
YDL147W	RPN5	rpn5-5001	TSA	0.981005	1.03701	1.00901	0.0396036	0.0129395
YDL147W	RPN5	rpn5-1	TSA	1.16348	1.14699	1.15524	0.011657	0.208187
YDL148C	NOP14	nop14-5001	TSA	0.466483	0.217654	0.342069	0.175949	-1.54764
YDL149W	ATG9		DMA	0.880528	0.867095	0.873812	0.00949849	-0.194606
YDL154W	MSH5		DMA	1.17325	1.06033	1.11679	0.0798459	0.159355
YDL155W	CLB3		DMA	1.04455	1.02327	1.03391	0.0150453	0.0481086
YDL156W	CMR1		DMA	0.979308	1.02258	1.00094	0.0305948	0.00135734
YDL157C			DMA	1.05885	0.987155	1.023	0.0506945	0.0328074
YDL159W	STE7		DMA	0.228354	0.301016	0.264685	0.0513797	-1.91765
YDL160C	DHH1		DMA	0.249185	0.280044	0.264614	0.0218207	-1.91804
YDL161W	ENT1		DMA	1.28917	1.17431	1.23174	0.0812185	0.300698
YDL162C			DMA	1.28285	1.16517	1.22401	0.0832123	0.291611
YDL164C	CDC9	cdc9-1-supp2	TSA	1.13025	1.31556	1.22291	0.13103	0.290314
YDL165W	CDC36	cdc36-16	TSA	1.15845	1.26834	1.2134	0.077699	0.27905
YDL167C	NRP1		DMA	1.1414	1.03679	1.08909	0.07397	0.123127
YDL168W	SFA1		DMA	0.993137	0.977986	0.985562	0.0107136	-0.0209821
YDL169C	UGX2		DMA	1.00089	0.968048	0.984467	0.0232199	-0.0225849
YDL170W	UGA3		DMA	1.13267	1.0084	1.07054	0.0878739	0.0983321
YDL171C	GLT1		DMA	1.09962	0.987155	1.04338	0.0795217	0.0612714
YDL172C			DMA	0.988699	1.03976	1.01423	0.0361064	0.0203855
YDL173W	PAR32		DMA	0.93696	0.904593	0.920776	0.0228874	-0.119077
YDL174C	DLD1		DMA	1.28374	1.32289	1.30332	0.0276788	0.382186
YDL175C	AIR2		DMA	1.19093	1.08372	1.13733	0.0758065	0.185647	1
YDL176W			DMA	1.10314	1.13267	1.11791	0.0208827	0.160798
YDL177C			DMA	1.12963	1.26654	1.19808	0.0968082	0.260729
YDL178W	DLD2		DMA	1.09557	1.1442	1.11989	0.0343877	0.163352
YDL179W	PCL9		DMA	1.08573	1.08811	1.08692	0.00168743	0.120246
YDL180W			DMA	0.839818	0.972508	0.906163	0.0938262	-0.142157
YDL181W	INH1		DMA	0.893224	0.944968	0.919096	0.0365887	-0.121712
YDL182W	LYS20		DMA	0.879126	0.850931	0.865029	0.0199371	-0.20918
YDL183C			DMA	0.89614	0.91122	0.90368	0.0106627	-0.146116
YDL184C	RPL41A		DMA	0.983918	0.956413	0.970165	0.0194492	-0.0436975
YDL185W	VMA1		DMA	1.02816	1.03121	1.02969	0.00215946	0.0422042
YDL186W			DMA	0.95646	1.1481	1.05228	0.135508	0.0735165
YDL187C			DMA	1.18687	1.04948	1.11817	0.0971497	0.161141
YDL188C	PPH22		DMA	1.04748	1.15358	1.10053	0.0750214	0.138201
YDL189W	RBS1		DMA	1.08259	1.23253	1.15756	0.10602	0.211089
YDL190C	UFD2		DMA	1.11968	1.03113	1.0754	0.0626104	0.104879
YDL190C	UFD2		TSA	1.29982	1.24566	1.27274	0.0382964	0.347943
YDL191W	RPL35A		DMA	0.838033	0.765357	0.801695	0.05139	-0.318875
YDL192W	ARF1		DMA	0.711233	0.660347	0.68579	0.0359824	-0.544161
YDL192W	ARF1		TSA	0.772096	0.783718	0.777907	0.00821801	-0.36233
YDL193W	NUS1	nus1-5001	TSA	1.17589	1.13289	1.15439	0.0304085	0.207131
YDL194W	SNF3		DMA	0.996338	1.00911	1.00272	0.00903227	0.00392499
YDL195W	SEC31	sec31-1	TSA	1.52353	1.52242	1.52298	0.000779702	0.606893
YDL197C	ASF2		DMA	0.996444	1.05874	1.02759	0.0440533	0.0392706
YDL199C			DMA	1.03791	1.0855	1.0617	0.0336548	0.0863829
YDL200C	MGT1		DMA	1.35946	1.40896	1.38421	0.035005	0.469063
YDL201W	TRM8		DMA	1.03366	1.18494	1.1093	0.106971	0.149651
YDL203C	ACK1		DMA	1.24906	1.09434	1.1717	0.109398	0.228602
YDL204W	RTN2		DMA	1.12364	1.01275	1.06819	0.0784068	0.0951729
YDL206W			DMA	1.30451	1.09109	1.1978	0.150912	0.260387
YDL207W	GLE1	gle1-4	TSA	1.07042	1.06143	1.06593	0.00635635	0.0921101
YDL207W	GLE1	gle1-2	TSA	1.32282	1.1275	1.22516	0.138108	0.29297
YDL208W	NHP2	nhp2-5001	TSA	1.0368	1.12551	1.08115	0.0627246	0.112571
YDL209C	CWC2	cwc2-1	TSA	1.20703	1.25344	1.23024	0.0328163	0.298935
YDL210W	UGA4		DMA	1.17754	1.09849	1.13802	0.0558973	0.186524
YDL211C			DMA	1.00975	1.15612	1.08294	0.1035	0.11495
YDL213C	NOP6		DMA	0.936614	0.920707	0.92866	0.0112479	-0.106777
YDL213C	NOP6		TSA	1.28841	1.29248	1.29045	0.0028794	0.367869
YDL214C	PRR2		DMA	1.07047	1.14243	1.10645	0.0508842	0.145938
YDL215C	GDH2		DMA	0.938192	0.91953	0.928861	0.0131956	-0.106466
YDL216C	RRI1		DMA	1.1953	1.10704	1.15117	0.0624098	0.203103
YDL217C	TIM22	tim22-19	TSA	1.17719	1.21012	1.19365	0.0232791	0.255386
YDL218W			DMA	0.90919	1.12243	1.01581	0.150786	0.0226329
YDL219W	DTD1		DMA	1.27209	1.15074	1.21142	0.085808	0.276695
YDL220C	CDC13	cdc13-1	TSA	1.26571	1.15636	1.21104	0.0773243	0.276243
YDL222C	FMP45		DMA	1.01555	1.35393	1.18474	0.23927	0.24457
YDL223C	HBT1		DMA	1.42309	1.31612	1.3696	0.0756389	0.453755
YDL224C	WHI4		DMA	1.17291	0.251071	0.711988	0.651836	-0.490074
YDL226C	GCS1		DMA	1.03661	1.19732	1.11696	0.113644	0.159584
YDL227C	HO		DMA	0.939709	0.947257	0.943483	0.00533715	-0.0839316
YDL229W	SSB1		DMA	0.929572	0.911116	0.920344	0.0130501	-0.119755
YDL230W	PTP1		DMA	1.10085	1.08371	1.09228	0.0121197	0.127341
YDL231C	BRE4		DMA	1.09628	1.14147	1.11887	0.0319546	0.162046
YDL232W	OST4		DMA	0.78424	0.68803	0.736135	0.0680306	-0.441957
YDL233W	MFG1		DMA	1.26771	1.52495	1.39633	0.181894	0.481637
YDL234C	GYP7		DMA	1.21198	1.12476	1.16837	0.0616742	0.224494
YDL236W	PHO13		DMA	1.04104	1.2582	1.14962	0.153556	0.201153
YDL237W	AIM6		DMA	1.85988	1.52217	1.69102	0.238792	0.757897
YDL238C	GUD1		DMA	1.10938	1.22122	1.1653	0.0790823	0.220704
YDL239C	ADY3		DMA	1.00126	1.09036	1.04581	0.0630086	0.0646213
YDL240W	LRG1		DMA	0.89278	0.795057	0.843919	0.0691008	-0.244824
YDL241W			DMA	1.06008	1.05008	1.05508	0.00707158	0.0773468
YDL242W			DMA	1.05243	0.924485	0.98846	0.0904741	-0.0167455
YDL243C	AAD4		DMA	1.05328	1.04818	1.05073	0.00360547	0.071394
YDR001C	NTH1		DMA	0.999194	1.03751	1.01835	0.027091	0.0262331
YDR002W	YRB1	yrb1-51	TSA	1.12516	1.20678	1.16597	0.0577166	0.221532
YDR003W	RCR2		DMA	1.14595	1.14316	1.14456	0.00196932	0.194788
YDR004W	RAD57		DMA	0.978374	0.893323	0.935848	0.06014	-0.0956537
YDR004W	RAD57		TSA	1.1883	1.18806	1.18818	0.000171274	0.248749
YDR005C	MAF1		DMA	1.33166	1.17462	1.25314	0.111048	0.325546
YDR006C	SOK1		DMA	0.901499	1.12169	1.0116	0.155702	0.0166347
YDR007W	TRP1		DMA	1.15766	1.09765	1.12766	0.0424341	0.173331
YDR008C			DMA	1.06214	1.01958	1.04086	0.030092	0.0577767
YDR009W	GAL3		DMA	1.1119	0.936041	1.02397	0.12435	0.0341738
YDR010C			DMA	1.11587	1.04165	1.07876	0.0524795	0.109375
YDR011W	SNQ2		DMA	1.07468	0.927567	1.00113	0.104027	0.00162239
YDR013W	PSF1	psf1-1	TSA	1.21401	1.17832	1.19616	0.0252405	0.258416
YDR014W	RAD61		DMA	1.00101	0.914443	0.957728	0.0612142	-0.0623125
YDR015C			DMA	1.00599	1.10248	1.05424	0.0682277	0.0761966
YDR016C	DAD1	dad1-5005	TSA	1.19973	1.09815	1.14894	0.071829	0.200305		1
YDR018C			DMA	1.02492	1.3004	1.16266	0.194799	0.21743
YDR019C	GCV1		DMA	1.15307	1.42805	1.29056	0.194447	0.367997
YDR020C	DAS2		DMA	1.03388	1.14681	1.09035	0.0798502	0.124788
YDR021W	FAL1	fal1-1	TSA	0.95759	0.977573	0.967581	0.01413	-0.0475453
YDR022C	ATG31		DMA	1.21964	1.23023	1.22493	0.00748766	0.292702
YDR024W	FYV1		DMA	0.731912	0.718858	0.725385	0.00923031	-0.463181
YDR025W	RPS11A		DMA	0.883397	0.785412	0.834404	0.0692859	-0.261181
YDR026C	NSI1		DMA	1.25445	1.23043	1.24244	0.016984	0.313181
YDR029W			DMA	1.19367	1.0347	1.11419	0.112407	0.155991
YDR030C	RAD28		DMA	1.04089	0.989485	1.01519	0.0363488	0.021746
YDR031W	MIX14		DMA	1.09101	1.06403	1.07752	0.0190764	0.107719
YDR032C	PST2		DMA	1.05586	1.09502	1.07544	0.0276896	0.104923
YDR033W	MRH1		DMA	0.980446	0.983213	0.981829	0.00195637	-0.0264557
YDR034C	LYS14		DMA	0.492764	0.494067	0.493415	0.000921302	-1.01913
YDR035W	ARO3		DMA	1.04479	1.11725	1.08102	0.05124	0.112391
YDR036C	EHD3		DMA	0.986299	1.03474	1.01052	0.0342526	0.0150975
YDR042C			DMA	0.987203	1.07186	1.02953	0.0598585	0.0419849		1
YDR043C	NRG1		DMA	1.07349	0.844385	0.958939	0.162003	-0.060489
YDR044W	HEM13	hem13-5001	TSA	1.18845	1.11499	1.15172	0.0519438	0.203788
YDR045C	RPC11	rpc11-5001	TSA	1.56773	1.43773	1.50273	0.0919225	0.587585
YDR046C	BAP3		DMA	1.00901	1.13129	1.07015	0.0864603	0.0978125
YDR048C			DMA	1.04251	0.989242	1.01588	0.0376665	0.0227242
YDR049W	VMS1		DMA	0.884843	0.943066	0.913954	0.0411702	-0.129806
YDR049W	VMS1		TSA	1.10799	1.04071	1.07435	0.0475746	0.103463
YDR050C	TPI1	tpi1-1670	TSA	1.46765	1.37341	1.42053	0.0666406	0.506431
YDR051C	DET1		DMA	0.978899	0.959552	0.969226	0.0136807	-0.0450957
YDR052C	DBF4	dbf4-2	TSA	0.973588	1.03198	1.00278	0.0412888	0.00401082
YDR052C	DBF4	dbf4-ts	TSA	1.1885	1.11619	1.15234	0.0511248	0.204573
YDR052C	DBF4	dbf4-1	TSA	1.14164	1.27051	1.20608	0.0911284	0.270321
YDR052C	DBF4	dbf4-4	TSA	1.28657	1.28039	1.28348	0.00437224	0.360063
YDR052C	DBF4	dbf4-3	TSA	1.36734	1.41008	1.38871	0.0302228	0.473742
YDR054C	CDC34	cdc34-2	TSA	0.0795009	0.151354	0.115428	0.0508081	-3.11494
YDR054C	CDC34	cdc34-1	TSA	1.13938	1.18582	1.1626	0.0328358	0.217357
YDR055W	PST1		DMA	0.981702	0.979868	0.980785	0.00129686	-0.0279916
YDR056C	EMC10		DMA	1.039	1.06082	1.04991	0.015433	0.0702629
YDR057W	YOS9		DMA	1.17579	1.17786	1.17683	0.00146633	0.234901
YDR058C	TGL2		DMA	1.18625	1.17853	1.18239	0.00545393	0.241707
YDR059C	UBC5		DMA	1.1945	1.14425	1.16937	0.0355292	0.225736
YDR060W	MAK21	mak21-3	TSA	1.17595	1.06423	1.12009	0.079	0.163614
YDR060W	MAK21	mak21-1	TSA	1.23288	1.17986	1.20637	0.0374897	0.270671
YDR061W			DMA	1.07857	1.09559	1.08708	0.0120384	0.120456
YDR062W	LCB2	lcb2-2	TSA	0.773533	0.942141	0.857837	0.119224	-0.221224		1
YDR062W	LCB2	lcb2-1	TSA	0.758019	0.802572	0.780295	0.0315036	-0.357908
YDR062W	LCB2	lcb2-19	TSA	0.798339	0.798339	0.798339	3.20996e-10	-0.324926
YDR062W	LCB2	lcb2-16	TSA	0.834531	0.817562	0.826046	0.0119984	-0.275705
YDR063W	AIM7		DMA	1.09663	0.985327	1.04098	0.0787033	0.0579409
YDR064W	RPS13	rps13-5001	TSA	1.36721	1.2098	1.2885	0.111308	0.365696
YDR066C	RTR2		DMA	1.12518	1.04324	1.08421	0.0579425	0.116644
YDR067C	OCA6		DMA	1.07251	1.00609	1.0393	0.0469662	0.0556136
YDR068W	DOS2		DMA	1.01651	0.950472	0.983492	0.0466968	-0.0240149
YDR070C	FMP16		DMA	0.974077	1.01836	0.996219	0.0313132	-0.00546587
YDR071C	PAA1		DMA	0.990646	1.0206	1.00562	0.0211779	0.00808725
YDR072C	IPT1		DMA	1.04196	0.993822	1.01789	0.0340357	0.0255794
YDR073W	SNF11		DMA	0.910307	1.06734	0.988822	0.111037	-0.0162171
YDR074W	TPS2		DMA	1.06673	1.06644	1.06659	0.000200984	0.0929992
YDR075W	PPH3		DMA	1.13243	1.03031	1.08137	0.0722055	0.112859
YDR076W	RAD55		DMA	1.03596	0.973539	1.00475	0.0441371	0.00683526
YDR077W	SED1		DMA	1.11502	1.07761	1.09632	0.0264508	0.132663
YDR080W	VPS41		DMA	0.749625	0.722779	0.736202	0.0189831	-0.441826
YDR081C	PDC2	pdc2-5001	TSA	0.643686	0.733809	0.688748	0.0637262	-0.537953
YDR082W	STN1	stn1-13	TSA	1.1715	1.12412	1.14781	0.033499	0.198887
YDR083W	RRP8		DMA	0.732139	0.740665	0.736402	0.00602854	-0.441435
YDR083W	RRP8		TSA	0.856302	0.926698	0.8915	0.0497771	-0.165693
YDR084C	TVP23		DMA	1.27364	1.1503	1.21197	0.0872144	0.277349
YDR085C	AFR1		DMA	1.17819	1.2116	1.19489	0.0236274	0.256881
YDR086C	SSS1	sss1-5001	TSA	1.42724	1.3362	1.38172	0.0643722	0.466463
YDR087C	RRP1	rrp1-1	TSA	0.805916	0.803802	0.804859	0.00149501	-0.313192
YDR088C	SLU7	slu7-ts2	TSA	0.879097	1.02107	0.950084	0.100392	-0.0738723
YDR088C	SLU7	slu7-ts1	TSA	1.28335	1.22295	1.25315	0.0427041	0.325558
YDR089W			DMA	1.07624	1.13046	1.10335	0.0383403	0.141886
YDR090C			DMA	1.09528	0.927762	1.01152	0.118454	0.0165279
YDR091C	RLI1	rli1-5001	TSA	1.29341	1.34001	1.31671	0.0329518	0.396939
YDR092W	UBC13		DMA	0.926368	1.14105	1.03371	0.151806	0.0478328
YDR093W	DNF2		DMA	1.1723	1.03962	1.10596	0.0938129	0.1453
YDR094W			DMA	1.31243	1.20486	1.25864	0.0760663	0.331871
YDR095C			DMA	1.20748	1.21669	1.21209	0.00651013	0.277493
YDR096W	GIS1		DMA	1.11081	1.01979	1.0653	0.0643592	0.0912559
YDR097C	MSH6		DMA	1.17043	1.09489	1.13266	0.0534171	0.179714
YDR098C	GRX3		DMA	1.17662	1.09344	1.13503	0.0588186	0.182726
YDR099W	BMH2		DMA	0.972938	0.9691	0.971019	0.00271399	-0.0424291
YDR100W	TVP15		DMA	1.03044	1.1358	1.08312	0.0744961	0.115192
YDR101C	ARX1		DMA	0.926822	0.880821	0.903822	0.0325276	-0.14589
YDR102C			DMA	1.01029	1.07047	1.04038	0.0425505	0.0571126
YDR103W	STE5		DMA	0.224203	0.162257	0.19323	0.0438025	-2.37161
YDR104C	SPO71		DMA	1.0524	1.05112	1.05176	0.000907316	0.0728068
YDR105C	TMS1		DMA	1.26814	1.08379	1.17597	0.130355	0.233849
YDR107C	TMN2		DMA	1.20139	1.04613	1.12376	0.109784	0.16833
YDR108W	TRS85		DMA	1.03168	1.06305	1.04737	0.0221838	0.066768
YDR109C			DMA	1.43826	1.23905	1.33865	0.140861	0.420783
YDR110W	FOB1		DMA	0.998971	0.95364	0.976305	0.0320537	-0.0345955
YDR111C	ALT2		DMA	1.11718	1.07308	1.09513	0.0311785	0.131102
YDR112W	IRC2		DMA	1.13441	0.986037	1.06022	0.104916	0.084369
YDR113C	PDS1	pds1-128	TSA	1.18522	1.14006	1.16264	0.031938	0.217403
YDR116C	MRPL1		DMA	0.833528	0.853667	0.843597	0.0142408	-0.245373	1
YDR117C	TMA64		DMA	1.07068	1.06863	1.06965	0.00145081	0.0971404
YDR118W	APC4	apc4-5001	TSA	1.15687	1.29712	1.227	0.0991763	0.295131
YDR119W	VBA4		DMA	1.16943	1.3197	1.24457	0.106258	0.315646
YDR120C	TRM1		DMA	1.1018	1.10401	1.1029	0.00156321	0.141306
YDR121W	DPB4		DMA	1.29776	1.2021	1.24993	0.0676457	0.321846
YDR122W	KIN1		DMA	1.11197	1.16392	1.13794	0.0367326	0.186427
YDR123C	INO2		DMA	0.790603	0.820983	0.805793	0.0214818	-0.311519
YDR123C	INO2		TSA	1.09336	1.11067	1.10202	0.012244	0.140146
YDR124W			DMA	1.06827	1.19977	1.13402	0.0929831	0.181444
YDR125C	ECM18		DMA	1.1017	1.08543	1.09356	0.0114989	0.129039
YDR126W	SWF1		DMA	0.877977	0.899172	0.888575	0.0149868	-0.170435
YDR126W	SWF1		TSA	1.19122	1.25242	1.22182	0.0432687	0.289032
YDR127W	ARO1		DMA	0.911763	0.890171	0.900967	0.0152675	-0.150454
YDR127W	ARO1		TSA	1.0958	1.06076	1.07828	0.024779	0.108729
YDR128W	MTC5		DMA	0.989556	0.870406	0.929981	0.0842521	-0.104727
YDR130C	FIN1		DMA	1.03125	0.955934	0.99359	0.0532535	-0.0092777
YDR131C			DMA	1.0662	1.1239	1.09505	0.0407993	0.131001
YDR132C			DMA	1.00251	1.16575	1.08413	0.115429	0.116534
YDR133C			DMA	1.19259	0.986037	1.08931	0.146052	0.123416
YDR134C			DMA	1.1964	1.25019	1.2233	0.0380343	0.290776
YDR135C	YCF1		DMA	1.12049	1.05027	1.08538	0.0496469	0.118199
YDR139C	RUB1		DMA	1.0154	1.12781	1.0716	0.0794845	0.0997702
YDR141C	DOP1	dop1-1	TSA	1.54025	2.01197	1.77611	0.333559	0.82872
YDR142C	PEX7		DMA	1.00907	1.0193	1.01419	0.00723773	0.0203227
YDR143C	SAN1		DMA	1.17858	1.0324	1.10549	0.103361	0.144687
YDR144C	MKC7		DMA	1.02139	0.94437	0.982879	0.0544597	-0.0249149
YDR145W	TAF12	taf12-l464a	TSA	0.187979	0.21324	0.20061	0.0178624	-2.31754
YDR145W	TAF12	taf12-l446a	TSA	0.868284	0.871053	0.869669	0.00195844	-0.201462
YDR145W	TAF12	taf12-9	TSA	1.10525	1.05531	1.08028	0.035307	0.111405
YDR145W	TAF12	taf12-w486stop	TSA	1.13495	1.10837	1.12166	0.0187936	0.165639
YDR145W	TAF12	taf12-ts23	TSA	1.19219	1.10755	1.14987	0.0598451	0.20147
YDR146C	SWI5		DMA	0.936041	0.931977	0.934009	0.00287358	-0.0984912
YDR147W	EKI1		DMA	0.982129	0.993822	0.987976	0.0082675	-0.0174528
YDR148C	KGD2		DMA	1.1524	1.15593	1.15417	0.00250108	0.20685
YDR149C			DMA	0.97333	0.986196	0.979763	0.00909759	-0.0294948
YDR150W	NUM1		DMA	0.928295	0.885954	0.907124	0.0299396	-0.140628
YDR150W	NUM1		TSA	1.10949	1.07523	1.09236	0.0242208	0.127447
YDR151C	CTH1		DMA	1.09421	1.21066	1.15243	0.082341	0.204681
YDR152W	GIR2		DMA	1.0837	1.04529	1.06449	0.0271536	0.0901689
YDR153C	ENT5		DMA	1.11569	1.02623	1.07096	0.0632611	0.0989061
YDR154C			DMA	1.06968	1.06987	1.06977	0.000134327	0.0973019
YDR155C	CPR1		DMA	1.08841	1.16427	1.12634	0.0536385	0.171639
YDR156W	RPA14		DMA	0.958492	0.910469	0.934481	0.0339579	-0.0977634
YDR156W	RPA14		TSA	1.12546	1.1711	1.14828	0.032276	0.199475
YDR157W			DMA	0.912794	0.993822	0.953308	0.0572948	-0.0689857
YDR158W	HOM2		DMA	0.855353	0.936983	0.896168	0.0577211	-0.15816
YDR158W	HOM2		TSA	1.12889	1.10774	1.11832	0.0149571	0.161328
YDR159W	SAC3		DMA	0.682273	0.650849	0.666561	0.02222	-0.58519
YDR161W	ACL4		DMA	0.910283	0.895021	0.902652	0.0107921	-0.147759
YDR162C	NBP2		DMA	0.876538	0.843984	0.860261	0.0230195	-0.217154
YDR162C	NBP2		TSA	1.08532	1.06783	1.07657	0.0123687	0.106447
YDR163W	CWC15		DMA	1.14864	1.08512	1.11688	0.0449158	0.159471
YDR164C	SEC1	sec1-1	TSA	1.28066	1.25924	1.26995	0.0151467	0.344773	1
YDR165W	TRM82		DMA	0.969582	1.02313	0.996356	0.0378641	-0.00526686
YDR166C	SEC5	sec5-24	TSA	1.23434	1.28622	1.26028	0.0366798	0.333744
YDR167W	TAF10	taf10-ts34	TSA	0.680264	0.660191	0.670227	0.0141935	-0.577277
YDR168W	CDC37	cdc37-ts	TSA	1.09639	1.10703	1.10171	0.00752681	0.139742
YDR168W	CDC37	cdc37-1	TSA	1.07839	1.15661	1.1175	0.0553044	0.160275
YDR169C	STB3		DMA	1.1116	0.894439	1.00302	0.153554	0.00434845
YDR170C	SEC7	sec7-1	TSA	1.29306	1.21715	1.25511	0.0536753	0.32781
YDR171W	HSP42		DMA	1.05074	0.996861	1.0238	0.0380959	0.0339319
YDR172W	SUP35	sup35-td	TSA	0.90684	0.902084	0.904462	0.00336311	-0.144868
YDR173C	ARG82		DMA	0.56163	0.624218	0.592924	0.0442569	-0.754081
YDR174W	HMO1		DMA	0.702998	0.673777	0.688388	0.0206621	-0.538707
YDR178W	SDH4		DMA	1.0292	0.960472	0.994836	0.0485984	-0.00746933
YDR179C	CSN9		DMA	1.02084	1.01737	1.01911	0.00245512	0.0273067
YDR179W-A	NVJ3		DMA	1.05094	0.96757	1.00925	0.0589501	0.0132888
YDR180W	SCC2	scc2-4	TSA	1.25667	1.18415	1.22041	0.0512815	0.287364
YDR181C	SAS4		DMA	1.1113	1.06562	1.08846	0.0322992	0.122285
YDR182W	CDC1	cdc1-4	TSA	0.739339	0.90454	0.821939	0.116815	-0.282896	1
YDR182W	CDC1	cdc1-1	TSA	0.877236	0.969688	0.923462	0.065373	-0.114875		1
YDR182W	CDC1	cdc1-6	TSA	0.991056	0.960652	0.975854	0.0214988	-0.0352627
YDR182W	CDC1	cdc1-2	TSA	1.3903	1.238	1.31415	0.107693	0.394126
YDR183W	PLP1		DMA	1.17883	0.987597	1.08321	0.135224	0.11532
YDR184C	ATC1		DMA	1.15619	1.05844	1.10731	0.0691211	0.147061
YDR185C	UPS3		DMA	1.17952	1.16408	1.1718	0.0109203	0.228726
YDR186C			DMA	0.833204	1.10287	0.968039	0.190686	-0.0468627
YDR188W	CCT6	cct6-18	TSA	0.772444	0.76398	0.768212	0.00598438	-0.380423
YDR189W	SLY1	sly1-ts	TSA	1.19144	1.25223	1.22183	0.0429867	0.289049
YDR191W	HST4		DMA	1.01533	1.11629	1.06581	0.0713892	0.0919538
YDR192C	NUP42		DMA	1.08377	1.02618	1.05498	0.0407268	0.0772111
YDR193W			DMA	1.18582	1.03999	1.11291	0.103119	0.154331
YDR196C	CAB5	cab5-1	TSA	1.0888	1.05032	1.06956	0.0272092	0.0970128
YDR196C	CAB5	cab5-5001	TSA	1.12037	1.24525	1.18281	0.0883062	0.242216
YDR198C	RKM2		DMA	0.955598	1.10349	1.02954	0.104577	0.0420069
YDR199W			DMA	1.0238	1.06506	1.04443	0.0291762	0.0627134
YDR201W	SPC19	spc19-5001	TSA	0.490192	0.616062	0.553127	0.0890036	-0.854317
YDR202C	RAV2		DMA	0.691803	1.0988	0.895303	0.287792	-0.159552
YDR203W			DMA	1.03739	1.05841	1.0479	0.0148616	0.0675021
YDR205W	MSC2		DMA	1.07463	1.28443	1.17953	0.148355	0.238213
YDR206W	EBS1		DMA	0.946966	1.18783	1.0674	0.170319	0.0941015
YDR207C	UME6		DMA	0.531811	0.650501	0.591156	0.0839269	-0.758389
YDR208W	MSS4	mss4-102	TSA	0.894806	1.03583	0.96532	0.0997218	-0.0509204
YDR208W	MSS4	mss4-103	TSA	1.26258	1.26918	1.26588	0.00466388	0.34014
YDR209C			DMA	1.16207	1.23489	1.19848	0.0514924	0.261208
YDR210W			DMA	1.10624	1.12836	1.1173	0.0156352	0.160017
YDR212W	TCP1	tcp1-1	TSA	0.931444	0.879669	0.905556	0.0366102	-0.143124
YDR212W	TCP1	tcp1-2	TSA	1.01565	0.876747	0.946198	0.0982183	-0.0797867
YDR213W	UPC2		DMA	1.14925	1.14212	1.14569	0.00504398	0.196213
YDR214W	AHA1		DMA	1.04586	1.05539	1.05062	0.00673518	0.0712453
YDR215C			DMA	1.05877	1.0689	1.06383	0.00716284	0.0892731
YDR216W	ADR1		DMA	1.09563	0.99798	1.0468	0.0690475	0.0659909
YDR217C	RAD9		DMA	0.90705	1.14332	1.02518	0.167066	0.0358829
YDR218C	SPR28		DMA	1.00144	1.05203	1.02673	0.0357703	0.0380633
YDR219C	MFB1		DMA	1.11558	1.11326	1.11442	0.00164208	0.156289
YDR220C			DMA	1.22069	1.08335	1.15202	0.0971133	0.204171
YDR221W	GTB1		DMA	1.15107	1.16945	1.16026	0.0129994	0.214445
YDR222W			DMA	1.09445	1.10126	1.09785	0.00481845	0.134687
YDR223W	CRF1		DMA	1.08287	1.05082	1.06685	0.0226627	0.0933556
YDR225W	HTA1		DMA	0.984656	0.954069	0.969362	0.0216284	-0.0448922
YDR227W	SIR4		DMA	0.285992	0.215941	0.250967	0.0495331	-1.99443
YDR228C	PCF11	pcf11-ts9	TSA	1.29648	1.15687	1.22667	0.0987191	0.294751	1
YDR228C	PCF11	pcf11-2	TSA	1.01097	1.02026	1.01562	0.00656972	0.0223554
YDR228C	PCF11	pcf11-ts2	TSA	1.12075	1.11636	1.11855	0.00310305	0.161633
YDR228C	PCF11	pcf11-1	TSA	1.26588	1.1235	1.19469	0.100675	0.25664
YDR228C	PCF11	pcf11-ts10	TSA	1.35616	1.29815	1.32716	0.0410211	0.408339
YDR229W	IVY1		DMA	0.952164	1.04866	1.00041	0.0682344	0.00059614
YDR233C	RTN1		DMA	1.1315	1.12174	1.12662	0.00690522	0.172003
YDR234W	LYS4		DMA	0.414092	0.476241	0.445166	0.0439455	-1.16758
YDR235W	PRP42	prp42-5001	TSA	0.124998	0.182294	0.153646	0.0405145	-2.70232
YDR236C	FMN1	fmn1-5001	TSA	1.18745	1.2651	1.22627	0.0549078	0.294281
YDR238C	SEC26	sec26-f856aw860a	TSA	1.22618	1.25338	1.23978	0.019228	0.310083		1
YDR238C	SEC26	sec26-11d26	TSA	1.46892	1.30186	1.38539	0.118129	0.470293
YDR239C			DMA	1.19703	0.973539	1.08529	0.158035	0.118076
YDR240C	SNU56	snu56-5001	TSA	1.23519	1.2859	1.26055	0.0358555	0.33405
YDR241W	BUD26		DMA	0.839772	1.03453	0.937152	0.137716	-0.0936445
YDR242W	AMD2		DMA	1.05525	1.03705	1.04615	0.0128695	0.0650953
YDR243C	PRP28	prp28-101	TSA	1.26561	1.71874	1.49217	0.320414	0.577415
YDR244W	PEX5		DMA	1.15188	1.11968	1.13578	0.0227714	0.183681
YDR245W	MNN10		DMA	0.665877	0.711433	0.688655	0.0322127	-0.538147
YDR245W	MNN10	mnn10-supp1	TSA	0.82221	0.895242	0.858726	0.0516414	-0.21973
YDR246W	TRS23	trs23-5001	TSA	0.965603	0.861628	0.913615	0.0735214	-0.130341
YDR247W	VHS1		DMA	1.06757	0.971292	1.01943	0.0680777	0.0277624
YDR248C			DMA	1.22174	1.09259	1.15717	0.0913207	0.210598
YDR249C			DMA	1.08046	0.993822	1.03714	0.0612643	0.0526133
YDR250C			DMA	1.15153	1.1481	1.14981	0.00242832	0.201401
YDR251W	PAM1		DMA	1.03021	1.03512	1.03267	0.00346557	0.046373
YDR252W	BTT1		DMA	1.11466	1.06366	1.08916	0.036063	0.123213
YDR253C	MET32		DMA	1.04026	1.03578	1.03802	0.00316895	0.0538356
YDR254W	CHL4		DMA	1.20288	1.18103	1.19196	0.0154519	0.253334
YDR255C	RMD5		DMA	1.04864	1.09471	1.07167	0.0325797	0.099866
YDR256C	CTA1		DMA	1.25291	1.19993	1.22642	0.0374617	0.294455
YDR257C	RKM4		DMA	1.02523	0.968811	0.997022	0.0398952	-0.00430331
YDR258C	HSP78		DMA	1.03954	1.10532	1.07243	0.0465144	0.100887
YDR259C	YAP6		DMA	1.07632	1.05272	1.06452	0.0166868	0.0902075
YDR260C	SWM1		DMA	1.19404	1.01566	1.10485	0.126132	0.143854
YDR261C	EXG2		DMA	1.07652	1.01427	1.0454	0.0440193	0.0640507
YDR262W			DMA	0.989405	1.0446	1.017	0.0390296	0.0243234
YDR263C	DIN7		DMA	1.16558	1.08562	1.1256	0.056539	0.170693
YDR265W	PEX10		DMA	1.00603	1.20436	1.10519	0.140238	0.1443
YDR266C	HEL2		DMA	1.49307	1.15965	1.32636	0.235759	0.407471
YDR269C			DMA	1.08844	1.01648	1.05246	0.0508819	0.0737617
YDR270W	CCC2		DMA	1.7341	1.24466	1.48938	0.346088	0.574712
YDR271C			DMA	0.988905	1.05378	1.02134	0.0458723	0.0304656
YDR272W	GLO2		DMA	1.43648	1.18594	1.31121	0.177155	0.390901
YDR273W	DON1		DMA	1.18413	1.16067	1.1724	0.0165889	0.229462
YDR274C			DMA	1.00217	1.08178	1.04198	0.0562921	0.0593241
YDR275W	BSC2		DMA	1.07384	0.961189	1.01752	0.0796591	0.0250515
YDR276C	PMP3		DMA	1.00551	0.977626	0.99157	0.0197195	-0.0122139
YDR276C	PMP3		TSA	1.1999	1.23633	1.21812	0.0257583	0.284654
YDR277C	MTH1		DMA	1.00669	1.05861	1.03265	0.0367093	0.0463494
YDR278C			DMA	0.94039	0.933916	0.937153	0.00457817	-0.0936435
YDR279W	RNH202		DMA	1.03657	0.965747	1.00116	0.0500766	0.00166822
YDR280W	RRP45	rrp45-5001	TSA	1.29598	1.4104	1.35319	0.0809057	0.436365	1
YDR281C	PHM6		DMA	1.22661	1.29045	1.25853	0.0451444	0.33174
YDR282C	MRX10		DMA	1.24559	1.16533	1.20546	0.0567507	0.269585
YDR284C	DPP1		DMA	1.07384	1.0784	1.07612	0.00322339	0.105843
YDR285W	ZIP1		DMA	1.10914	1.23966	1.1744	0.0922876	0.231922
YDR286C			DMA	1.12422	1.06291	1.09357	0.0433529	0.12904
YDR287W	INM2		DMA	1.0089	1.09441	1.05166	0.0604651	0.0726621
YDR288W	NSE3	nse3-5001	TSA	0.702456	0.827832	0.765144	0.0886546	-0.386197
YDR288W	NSE3	nse3-ts3	TSA	0.974711	1.10849	1.0416	0.094595	0.0588003
YDR288W	NSE3	nse3-ts4	TSA	1.08535	1.04029	1.06282	0.0318632	0.0878937
YDR289C	RTT103		DMA	0.789317	0.806375	0.797846	0.0120618	-0.325818
YDR290W			DMA	1.0046	0.995706	1.00015	0.00629066	0.000221853
YDR291W	HRQ1		DMA	1.04389	1.00145	1.02267	0.0300077	0.0323452
YDR292C	SRP101	srp101-47	TSA	1.21125	1.44221	1.32673	0.163317	0.407876
YDR293C	SSD1		DMA	1.19944	1.18054	1.18999	0.0133645	0.250949
YDR293C	SSD1		TSA	2.27979	0.350792	1.31529	1.36401	0.395381
YDR294C	DPL1		DMA	1.09541	1.0051	1.05025	0.0638627	0.0707388
YDR297W	SUR2		DMA	1.02624	1.02128	1.02376	0.00351355	0.033877
YDR299W	BFR2	bfr2-5001	TSA	0.606527	0.525643	0.566085	0.0571941	-0.820909
YDR302W	GPI11	gpi11-5001	TSA	1.10321	1.17246	1.13783	0.0489652	0.186291
YDR303C	RSC3	rsc3-1	TSA	1.31121	1.3504	1.33081	0.0277085	0.4123
YDR304C	CPR5		DMA	0.986773	1.03089	1.00883	0.0311962	0.0126862
YDR305C	HNT2		DMA	1.06442	1.2007	1.13256	0.0963629	0.179587
YDR306C			DMA	1.21879	1.10258	1.16069	0.0821755	0.214978
YDR307W	PMT7		DMA	1.04442	0.992733	1.01858	0.0365507	0.0265568
YDR309C	GIC2		DMA	1.03317	1.3251	1.17913	0.206422	0.237727
YDR310C	SUM1		DMA	0.888946	1.00714	0.948041	0.0835738	-0.076978
YDR310C	SUM1		TSA	1.33345	1.12324	1.22835	0.148639	0.296716
YDR311W	TFB1	tfb1-1	TSA	1.15725	1.12969	1.14347	0.0194881	0.193419	1
YDR311W	TFB1	tfb1-6	TSA	0.950138	0.893926	0.922032	0.0397477	-0.117111		1
YDR312W	SSF2		DMA	1.14368	1.14833	1.14601	0.00328372	0.196614
YDR313C	PIB1		DMA	1.14332	1.00209	1.07271	0.0998607	0.101254
YDR314C	RAD34		DMA	1.10257	1.03703	1.0698	0.0463438	0.0973427
YDR315C	IPK1		DMA	0.910065	0.804665	0.857365	0.0745293	-0.222018
YDR315C	IPK1		TSA	1.02238	0.978957	1.00067	0.0307063	0.000965087
YDR316W	OMS1		DMA	0.966822	0.96933	0.968076	0.0017734	-0.0468071
YDR317W	HIM1		DMA	0.930474	0.947695	0.939085	0.0121766	-0.0906729
YDR318W	MCM21		DMA	0.784993	0.824504	0.804748	0.0279382	-0.31339
YDR319C	YFT2		DMA	1.03885	0.901711	0.970282	0.0969735	-0.0435243
YDR320C	SWA2		DMA	1.0308	1.15226	1.09153	0.085886	0.126347
YDR321W	ASP1		DMA	1.00859	1.01457	1.01158	0.00423366	0.0166112
YDR325W	YCG1	ycg1-2	TSA	1.28168	1.24916	1.26542	0.0229958	0.339619
YDR326C	YSP2		DMA	1.18632	1.24573	1.21603	0.042006	0.282175
YDR328C	SKP1	skp1-3	TSA	0.867548	0.995011	0.93128	0.0901299	-0.102714
YDR329C	PEX3		DMA	1.08624	1.14557	1.1159	0.0419476	0.158214
YDR330W	UBX5		DMA	1.25776	1.05696	1.15736	0.141989	0.210837
YDR331W	GPI8	gpi8-5001	TSA	0.72621	0.443136	0.584673	0.200163	-0.774297		1
YDR331W	GPI8	gpi8-ts	TSA	0.931311	0.905726	0.918519	0.0180917	-0.122619
YDR332W	IRC3		DMA	1.18554	1.06991	1.12773	0.0817587	0.173418
YDR333C	RQC1		DMA	1.26712	1.18413	1.22563	0.0586861	0.293518
YDR334W	SWR1		DMA	0.87433	0.857535	0.865932	0.0118759	-0.207674
YDR334W	SWR1		TSA	1.01913	0.990568	1.00485	0.0201941	0.00697704
YDR335W	MSN5		DMA	0.929605	0.879088	0.904347	0.0357214	-0.145052
YDR336W	MRX8		DMA	0.813235	1.07766	0.945448	0.186977	-0.0809301
YDR338C			DMA	1.00364	1.27325	1.13844	0.190643	0.187064
YDR339C	FCF1	fcf1-5001	TSA	0.860391	0.919371	0.889881	0.0417056	-0.168316
YDR340W			DMA	1.05667	1.05836	1.05751	0.00119339	0.0806734
YDR341C		ydr341c-5001	TSA	1.19773	1.1765	1.18711	0.0150178	0.247459
YDR344C			DMA	1.14171	0.960735	1.05122	0.127965	0.0720649
YDR345C	HXT3		DMA	1.52697	1.19498	1.36097	0.234758	0.44464
YDR346C	SVF1		DMA	1.05572	1.19465	1.12518	0.0982378	0.170157
YDR348C	PAL1		DMA	1.05357	1.00259	1.02808	0.0360473	0.0399574
YDR349C	YPS7		DMA	1.08243	1.0262	1.05431	0.0397575	0.0763053
YDR351W	SBE2		DMA	1.09974	1.03954	1.06964	0.0425656	0.0971261
YDR352W	YPQ2		DMA	1.03796	1.08897	1.06347	0.0360716	0.0887768
YDR354W	TRP4		DMA	1.07106	1.02206	1.04656	0.0346474	0.065658
YDR356W	SPC110	spc110-220	TSA	0.921414	0.983064	0.952239	0.043593	-0.0706042
YDR356W	SPC110	spc110-221	TSA	1.17028	1.24172	1.206	0.0505137	0.270234
YDR357C	CNL1		DMA	1.18184	1.57478	1.37831	0.277849	0.462901
YDR358W	GGA1		DMA	1.07044	1.07729	1.07386	0.00484639	0.102809
YDR359C	EAF1		DMA	0.22809	0.692392	0.460241	0.328311	-1.11954
YDR360W	OPI7		DMA	1.0183	0.998766	1.00853	0.0138126	0.0122581
YDR361C	BCP1	bcp1-ts	TSA	1.08119	0.917537	0.999364	0.11572	-0.000918259
YDR362C	TFC6	tfc6-m1	TSA	1.25436	1.14918	1.20177	0.0743756	0.265163
YDR363W	ESC2		DMA	1.09021	1.11805	1.10413	0.0196837	0.142911
YDR363W-A	SEM1		DMA	1.00911	1.05943	1.03427	0.0355797	0.0486124
YDR364C	CDC40	cdc40-ts	TSA	0.842757	0.741138	0.791947	0.0718558	-0.336524
YDR368W	YPR1		DMA	1.1037	1.06827	1.08599	0.0250556	0.119006
YDR369C	XRS2		DMA	1.01608	1.1358	1.07594	0.0846513	0.105596
YDR370C	DXO1		DMA	1.15113	1.03199	1.09156	0.0842383	0.126392
YDR371W	CTS2		DMA	1.06605	1.0553	1.06067	0.00760786	0.0849821
YDR372C	VPS74		DMA	1.02139	1.01399	1.01769	0.00523355	0.0252935
YDR373W	FRQ1	frq1-1	TSA	1.32407	1.34407	1.33407	0.01414	0.415834
YDR374C	PHO92		DMA	0.97793	0.98298	0.980455	0.00357066	-0.0284767
YDR375C	BCS1		DMA	0.817773	0.895531	0.856652	0.0549835	-0.223218	1
YDR378C	LSM6		DMA	0.600536	0.547831	0.574183	0.037268	-0.800417
YDR378C	LSM6		TSA	0.666166	0.632543	0.649355	0.0237756	-0.622922
YDR379W	RGA2		DMA	1.21626	1.0139	1.11508	0.14309	0.157145
YDR380W	ARO10		DMA	1.16112	1.5008	1.33096	0.240189	0.412467
YDR382W	RPP2B		DMA	1.06136	1.18159	1.12148	0.0850165	0.165402
YDR383C	NKP1		DMA	1.02913	0.897279	0.963207	0.0932364	-0.0540824
YDR384C	ATO3		DMA	1.22023	1.15926	1.18974	0.0431155	0.250652
YDR385W	EFT2		DMA	0.915965	1.00814	0.962053	0.0651791	-0.0558115
YDR386W	MUS81		DMA	1.00736	1.04948	1.02842	0.0297792	0.0404274
YDR387C			DMA	1.03752	1.06654	1.05203	0.0205193	0.073177
YDR388W	RVS167		DMA	0.798479	0.76716	0.78282	0.0221457	-0.353248
YDR389W	SAC7		DMA	0.804964	0.734494	0.769729	0.0498304	-0.377577		1
YDR391C			DMA	1.24698	1.25535	1.25116	0.00592438	0.323271
YDR392W	SPT3		DMA	0.87305	0.831752	0.852401	0.0292017	-0.230396	1
YDR392W	SPT3		TSA	0.692419	0.614451	0.653435	0.0551323	-0.613884
YDR393W	SHE9		DMA	0.863678	0.863939	0.863809	0.000184271	-0.211217
YDR394W	RPT3	rpt3-1	TSA	1.31631	1.34965	1.33298	0.0235767	0.414652
YDR395W	SXM1		DMA	1.09518	1.06925	1.08221	0.018333	0.113987	1
YDR398W	UTP5	utp5-5001	TSA	0.878539	0.894523	0.886531	0.0113029	-0.173757
YDR399W	HPT1		DMA	0.985517	1.00217	0.993845	0.0117778	-0.00890755
YDR400W	URH1		DMA	1.0572	0.984037	1.02062	0.0517337	0.0294434
YDR401W			DMA	1.1239	1.05306	1.08848	0.0500964	0.122314
YDR402C	DIT2		DMA	0.992327	1.02322	1.00778	0.0218478	0.0111747
YDR403W	DIT1		DMA	0.962957	1.04156	1.00226	0.0555801	0.00325477
YDR404C	RPB7	rpb7-5001	TSA	0.753344	0.701092	0.727218	0.0369475	-0.459541
YDR406W	PDR15		DMA	1.07333	1.25925	1.16629	0.131469	0.221926
YDR408C	ADE8		DMA	1.28052	1.18569	1.23311	0.0670535	0.302297
YDR409W	SIZ1		DMA	1.25583	1.15254	1.20418	0.0730364	0.268056
YDR410C	STE14		DMA	0.267567	0.26886	0.268214	0.000914004	-1.89855
YDR411C	DFM1		DMA	1.04583	1.12547	1.08565	0.056313	0.118561
YDR414C	ERD1		DMA	0.846091	0.993822	0.919956	0.104461	-0.120363
YDR415C			DMA	0.927567	1.10839	1.01798	0.127862	0.0257074
YDR416W	SYF1	syf1-5001	TSA	0.763785	0.488938	0.626362	0.194346	-0.674932		1
YDR419W	RAD30		DMA	1.02016	1.13018	1.07517	0.0777981	0.104563
YDR420W	HKR1		DMA	1.00731	0.880432	0.943872	0.0897176	-0.0833363
YDR421W	ARO80		DMA	0.907476	0.974831	0.941154	0.0476275	-0.0874979
YDR422C	SIP1		DMA	1.081	1.01806	1.04953	0.0445037	0.0697433
YDR423C	CAD1		DMA	0.97209	1.06502	1.01856	0.0657119	0.0265243
YDR424C	DYN2		DMA	0.829993	1.11198	0.970986	0.199395	-0.0424771
YDR425W	SNX41		DMA	0.927917	0.958246	0.943081	0.0214463	-0.0845458
YDR426C			DMA	0.965388	1.14673	1.05606	0.128231	0.0786935
YDR428C	BNA7		DMA	0.985197	1.06024	1.02272	0.0530628	0.0324084
YDR430C	CYM1		DMA	1.04486	1.00356	1.02421	0.029208	0.0345107
YDR431W			DMA	0.871826	0.835512	0.853669	0.0256778	-0.228252
YDR434W	GPI17	gpi17-5001	TSA	0.583621	0.467384	0.525503	0.0821922	-0.92823
YDR435C	PPM1		DMA	1.17778	1.10159	1.13968	0.0538744	0.18863
YDR436W	PPZ2		DMA	1.08379	1.02675	1.05527	0.0403346	0.0776136
YDR437W	GPI19	gpi19-2	TSA	1.05263	0.985571	1.0191	0.0474145	0.0272932
YDR437W	GPI19	gpi19-5001	TSA	1.23633	1.15309	1.19471	0.0588658	0.25666
YDR437W	GPI19	gpi19-2xh	TSA	1.54982	1.07643	1.31313	0.334734	0.393006
YDR438W	THI74		DMA	0.949738	1.04527	0.997503	0.0675503	-0.00360663
YDR439W	LRS4		DMA	1.1289	1.05502	1.09196	0.0522407	0.126918
YDR440W	DOT1		DMA	1.28475	1.17005	1.2274	0.0811011	0.295607
YDR441C	APT2		DMA	0.978835	0.915312	0.947074	0.0449178	-0.0784517
YDR444W			DMA	1.12383	1.18966	1.15674	0.0465524	0.210068
YDR445C			DMA	1.17745	1.05095	1.1142	0.0894513	0.15601
YDR446W	ECM11		DMA	1.09088	1.34779	1.21933	0.181668	0.286093
YDR447C	RPS17B		DMA	1.03011	1.01575	1.02293	0.010151	0.032706
YDR449C	UTP6	utp6-5001	TSA	1.049	0.989282	1.01914	0.0422268	0.0273539
YDR451C	YHP1		DMA	1.13659	1.09595	1.11627	0.0287329	0.158685
YDR452W	PPN1		DMA	1.09088	0.962469	1.02667	0.0907974	0.0379753
YDR453C	TSA2		DMA	1.27378	0.914629	1.09421	0.253962	0.129885
YDR454C	GUK1	guk1-5001	TSA	0.977712	1.07143	1.02457	0.066268	0.0350196
YDR455C			DMA	0.875509	0.992128	0.933819	0.0824616	-0.0987856
YDR458C	HEH2		DMA	0.907336	0.994842	0.951089	0.0618761	-0.0723472
YDR459C	PFA5		DMA	1.01795	1.08075	1.04935	0.0444084	0.0694921
YDR460W	TFB3	tfb3-ts	TSA	0.974651	0.708627	0.841639	0.188107	-0.248727
YDR461W	MFA1		DMA	0.978038	1.02966	1.00385	0.0365041	0.00554406
YDR463W	STP1		DMA	1.07465	1.09489	1.08477	0.0143092	0.117393
YDR463W	STP1		TSA	1.23089	1.24544	1.23816	0.0102829	0.308204
YDR465C	RMT2		DMA	1.24528	1.08929	1.16729	0.110298	0.223158
YDR466W	PKH3		DMA	1.06143	1.02009	1.04076	0.0292365	0.0576377
YDR467C			DMA	1.46709	1.09239	1.27974	0.264951	0.355853
YDR469W	SDC1		DMA	1.07735	0.312291	0.69482	0.540977	-0.525289
YDR471W	RPL27B		DMA	0.920905	0.888765	0.904835	0.0227261	-0.144274
YDR473C	PRP3	prp3-1	TSA	1.43173	1.29249	1.36211	0.0984625	0.445843
YDR474C			DMA	1.02854	1.03789	1.03321	0.0066117	0.0471404
YDR475C	JIP4		DMA	0.961769	0.996097	0.978933	0.0242736	-0.0307177
YDR476C			DMA	1.13398	1.20204	1.16801	0.0481247	0.224052
YDR477W	SNF1		DMA	0.958733	0.988307	0.97352	0.0209121	-0.0387171
YDR478W	SNM1	snm1-172	TSA	0.934789	0.176619	0.555704	0.536107	-0.847611
YDR478W	SNM1	snm1-5001	TSA	0.546158	0.590046	0.568102	0.0310333	-0.815778
YDR479C	PEX29		DMA	1.04234	1.24026	1.1413	0.139956	0.190677
YDR480W	DIG2		DMA	1.13407	1.3731	1.25358	0.169015	0.32606
YDR481C	PHO8		DMA	1.34949	1.14351	1.2465	0.145652	0.317886
YDR482C	CWC21		DMA	1.21016	1.05421	1.13218	0.110275	0.179108
YDR483W	KRE2		DMA	0.988905	0.995343	0.992124	0.00455228	-0.0114076
YDR483W	KRE2		DMA	1.13158	1.27068	1.20113	0.0983554	0.264392
YDR485C	VPS72		DMA	1.02091	0.899752	0.960329	0.0856696	-0.058399
YDR486C	VPS60		DMA	1.02358	0.966498	0.99504	0.0403637	-0.00717388
YDR488C	PAC11		DMA	1.04806	0.988219	1.01814	0.0423154	0.0259373
YDR489W	SLD5	sld5-5001	TSA	1.16814	1.19392	1.18103	0.018227	0.240047
YDR490C	PKH1		DMA	1.14198	1.09068	1.11633	0.0362758	0.158761
YDR491C			DMA	1.174	1.07321	1.1236	0.0712728	0.168134
YDR492W	IZH1		DMA	1.09403	1.01605	1.05504	0.0551368	0.0773011
YDR493W	MZM1		DMA	1.05874	0.962877	1.01081	0.0677838	0.0155085
YDR494W	RSM28		DMA	1.03915	1.11269	1.07592	0.0520007	0.105575
YDR496C	PUF6		DMA	0.88169	0.857773	0.869732	0.0169117	-0.201358
YDR496C	PUF6		TSA	0.962894	0.961363	0.962129	0.00108258	-0.0556979
YDR497C	ITR1		DMA	0.971513	1.06426	1.01789	0.0655846	0.0255799
YDR498C	SEC20	sec20-1	TSA	0.870752	1.00693	0.938844	0.0962955	-0.0910434
YDR500C	RPL37B		DMA	0.22708	0.275249	0.251164	0.0340603	-1.9933
YDR501W	PLM2		DMA	1.32737	1.32463	1.326	0.00193125	0.407081
YDR502C	SAM2		DMA	0.916197	1.03036	0.973279	0.0807261	-0.0390747
YDR503C	LPP1		DMA	1.24132	1.18793	1.21463	0.0377565	0.280513
YDR504C	SPG3		DMA	1.22623	1.15568	1.19095	0.0498914	0.252118
YDR505C	PSP1		DMA	0.973663	1.01274	0.993201	0.0276316	-0.00984172
YDR506C	GMC1		DMA	1.13965	1.19458	1.16711	0.0388423	0.222945
YDR508C	GNP1		DMA	0.978559	1.02515	1.00186	0.0329463	0.00267425
YDR509W			DMA	1.10973	1.0543	1.08202	0.0391969	0.113724
YDR510W	SMT3	smt3-331	TSA	1.17257	1.18187	1.17722	0.00657463	0.235385
YDR511W	SDH7		DMA	1.07013	1.07271	1.07142	0.00182562	0.0995231
YDR512C	EMI1		DMA	0.955265	0.951592	0.953429	0.0025971	-0.0688028
YDR512C	EMI1		TSA	1.12852	1.35624	1.24238	0.161025	0.313103
YDR513W	GRX2		DMA	1.15432	1.12561	1.13997	0.0203019	0.188994
YDR514C			DMA	0.920509	0.888426	0.904467	0.0226862	-0.14486
YDR515W	SLF1		DMA	0.981734	1.0062	0.993967	0.0172993	-0.00873061
YDR516C	EMI2		DMA	1.08516	1.28272	1.18394	0.139692	0.243595
YDR517W	GRH1		DMA	1.17891	1.18183	1.18037	0.00206596	0.239238
YDR519W	FPR2		DMA	1.13091	1.09699	1.11395	0.0239867	0.155687
YDR520C	URC2		DMA	1.11843	1.20061	1.15952	0.058104	0.213527
YDR522C	SPS2		DMA	1.03377	0.877355	0.955563	0.110602	-0.0655771
YDR524C	AGE1		DMA	1.02669	0.965743	0.996218	0.0430975	-0.00546678
YDR525W	API2		DMA	1.04442	1.06819	1.0563	0.0168022	0.0790255
YDR525W-A	SNA2		DMA	1.06139	1.10788	1.08463	0.032869	0.117209
YDR527W	RBA50	rba50-5001	TSA	1.11789	1.17955	1.14872	0.0435965	0.200027
YDR528W	HLR1		DMA	1.19324	1.15906	1.17615	0.0241698	0.234067
YDR530C	APA2		DMA	1.20393	1.19495	1.19944	0.00634852	0.26236
YDR531W	CAB1	cab1-5001	TSA	0.793656	0.676347	0.735002	0.0829495	-0.444181
YDR532C	KRE28		DMA	0.491255	0.473486	0.482371	0.0125644	-1.05179
YDR533C	HSP31		DMA	1.16694	1.16485	1.1659	0.00147519	0.22144
YDR534C	FIT1		DMA	1.09625	1.09154	1.0939	0.00332689	0.129477
YDR535C			DMA	1.08165	1.00545	1.04355	0.0538877	0.0614995
YDR536W	STL1		DMA	1.07369	0.973738	1.02372	0.0706799	0.0338158
YDR537C			DMA	1.07133	1.09955	1.08544	0.0199487	0.11828
YDR538W	PAD1		DMA	0.971247	0.950568	0.960907	0.0146218	-0.0575306
YDR539W	FDC1		DMA	1.04749	1.0904	1.06894	0.0303444	0.0961858
YDR540C	IRC4		DMA	1.07475	1.11706	1.0959	0.02992	0.132119
YDR541C			DMA	1.20353	0.979283	1.0914	0.158563	0.126186
YER041W	YEN1		DMA	1.01001	1.09548	1.05274	0.0604361	0.074154
YER042W	MXR1		DMA	1.02752	1.02931	1.02841	0.00126285	0.04042
YER044C-A	MEI4		DMA	0.976751	1.109	1.04287	0.0935118	0.0605642
YER045C	ACA1		DMA	1.15371	1.10143	1.12757	0.0369715	0.173218
YER046W	SPO73		DMA	1.18607	1.16716	1.17662	0.0133742	0.234645
YER046W-A			DMA	0.953464	0.967623	0.960544	0.0100119	-0.0580766
YER047C	SAP1		DMA	1.21208	1.03357	1.12283	0.126227	0.167136
YER048C	CAJ1		DMA	0.992536	0.958938	0.975737	0.0237575	-0.0354359
YER049W	TPA1		DMA	1.04209	1.16407	1.10308	0.0862515	0.141542
YER051W	JHD1		DMA	1.12266	1.1647	1.14368	0.029731	0.193682
YER052C	HOM3		DMA	0.822187	0.984606	0.903396	0.114847	-0.146569
YER053C	PIC2		DMA	1.03597	1.06749	1.05173	0.0222913	0.0727631
YER054C	GIP2		DMA	1.12873	1.05911	1.09392	0.0492249	0.129509
YER055C	HIS1		DMA	0.562345	0.506409	0.534377	0.0395526	-0.90407
YER056C	FCY2		DMA	0.952182	1.05714	1.00466	0.0742197	0.00671242
YER056C-A	RPL34A		DMA	0.902934	0.938068	0.920501	0.0248432	-0.119509
YER057C	HMF1		DMA	0.773351	1.10058	0.936965	0.231386	-0.0939332
YER059W	PCL6		DMA	1.26323	1.17148	1.21735	0.0648773	0.283747
YER060W	FCY21		DMA	0.979392	1.185	1.0822	0.145387	0.113962
YER060W-A	FCY22		DMA	0.982606	1.43484	1.20872	0.319775	0.273482
YER061C	CEM1		DMA	0.789586	0.78404	0.786813	0.00392136	-0.345907
YER062C	GPP2		DMA	1.03819	1.08934	1.06376	0.0361684	0.0891763
YER063W	THO1		DMA	1.0649	0.950174	1.00754	0.0811253	0.0108342
YER064C	VHR2		DMA	1.14407	0.914159	1.02911	0.16257	0.0414023
YER065C	ICL1		DMA	1.01246	0.828136	0.920298	0.130336	-0.119827
YER066C-A			DMA	1.0949	1.05971	1.0773	0.0248854	0.107426
YER066W	RRT13		DMA	1.13661	1.0543	1.09546	0.0582032	0.131533
YER067C-A			DMA	0.989248	0.94447	0.966859	0.0316628	-0.0486221
YER067W	RGI1		DMA	1.12187	1.22331	1.17259	0.0717274	0.2297
YER069W	ARG5,6		DMA	0.530696	0.527343	0.529019	0.0023713	-0.918607
YER071C	TDA2		DMA	1.14406	1.39136	1.26771	0.174866	0.342224
YER072W	VTC1		DMA	1.03745	1.11534	1.0764	0.0550707	0.106209
YER073W	ALD5		DMA	1.18219	1.17981	1.181	0.00167689	0.24001
YER074W	RPS24A		DMA	0.730406	0.739049	0.734728	0.00611166	-0.444719
YER075C	PTP3		DMA	1.01246	1.0825	1.04748	0.049524	0.0669203
YER077C	MRX1		DMA	1.03796	1.01315	1.02555	0.0175442	0.0364038
YER078C	ICP55		DMA	1.01784	1.03271	1.02527	0.0105144	0.0360093
YER079W			DMA	1.0358	1.17263	1.10422	0.0967484	0.143022
YER080W	AIM9		DMA	0.948159	1.03473	0.991445	0.0612156	-0.0123948
YER081W	SER3		DMA	1.13065	1.05675	1.0937	0.0522572	0.129216
YER083C	GET2		DMA	0.985026	1.13161	1.05832	0.103652	0.0817746
YER083C	GET2		TSA	1.21415	1.16443	1.18929	0.0351522	0.250101
YER083C	GET2		TSA	1.27108	1.22999	1.25053	0.0290509	0.322545
YER083C	GET2		TSA	1.30552	1.20823	1.25687	0.0687942	0.329838
YER084W			DMA	1.86941	1.24428	1.55684	0.44204	0.638625
YER085C			DMA	1.05535	1.10238	1.07886	0.0332561	0.109514
YER087C-A			DMA	1.04297	1.0049	1.02393	0.026922	0.0341197
YER088C	DOT6		DMA	1.10987	1.09294	1.10141	0.0119699	0.139348
YER089C	PTC2		DMA	1.05286	1.04117	1.04702	0.00826205	0.0662832
YER090W	TRP2		DMA	1.14097	1.13818	1.13958	0.00197501	0.188498
YER091C	MET6		DMA	1.03289	0.992034	1.01246	0.0288887	0.0178668
YER091C-A			DMA	1.14641	1.09696	1.12169	0.034965	0.16567
YER092W	IES5		DMA	0.956889	0.953242	0.955065	0.00257903	-0.0663287
YER092W	IES5		TSA	1.10967	1.0691	1.08939	0.0286846	0.123517
YER093C	TSC11	tsc11-1	TSA	1.2268	1.20632	1.21656	0.0144861	0.282805	1
YER093C	TSC11	tsc11-5	TSA	1.24062	1.28382	1.26222	0.0305501	0.335962
YER093C	TSC11	tsc11-7	TSA	1.42951	1.51629	1.4729	0.0613642	0.558662
YER093C-A	AIM11		DMA	0.969969	0.91342	0.941695	0.0399859	-0.0866687	1
YER094C	PUP3	pup3-5001	TSA	1.20083	1.20221	1.20152	0.000976603	0.264856
YER095W	RAD51		DMA	1.18838	1.17249	1.18043	0.0112348	0.239318
YER096W	SHC1		DMA	1.09271	1.06702	1.07986	0.0181629	0.110849
YER097W			DMA	1.25667	1.3127	1.28468	0.0396205	0.361415
YER098W	UBP9		DMA	1.14614	1.19261	1.16937	0.0328583	0.225734
YER101C	AST2		DMA	0.876596	1.057	0.966797	0.127563	-0.0487153
YER106W	MAM1		DMA	1.07856	1.01095	1.04475	0.047803	0.0631637
YER108C			DMA	1.11567	1.15113	1.1334	0.0250759	0.180656
YER109C	FLO8		DMA	1.01742	0.913685	0.96555	0.0733483	-0.0505772
YER111C	SWI4		DMA	1.16067	1.01801	1.08934	0.100877	0.12345
YER113C	TMN3		DMA	1.21452	1.22645	1.22049	0.00843976	0.287456
YER114C	BOI2		DMA	1.15796	1.36205	1.26001	0.144317	0.333431
YER115C	SPR6		DMA	1.32181	1.34441	1.33311	0.0159771	0.414793
YER116C	SLX8		DMA	0.589819	0.704065	0.646942	0.0807841	-0.628292
YER116C	SLX8	slx8-supp1	TSA	0.96828	0.976628	0.972454	0.00590239	-0.040298
YER117W	RPL23B		DMA	1.20449	1.23691	1.2207	0.0229249	0.287709
YER118C	SHO1		DMA	1.1466	1.21828	1.18244	0.0506826	0.241766
YER119C	AVT6		DMA	1.04432	1.0898	1.06706	0.0321582	0.0936372
YER119C-A			DMA	0.981788	0.893012	0.9374	0.062774	-0.0932633
YER120W	SCS2		DMA	0.952213	0.917552	0.934882	0.0245094	-0.097143
YER121W			DMA	1.18701	1.22274	1.20487	0.0252645	0.268883
YER123W	YCK3		DMA	0.968598	1.08657	1.02758	0.0834167	0.0392536
YER124C	DSE1		DMA	1.12594	1.10216	1.11405	0.0168137	0.155814
YER125W	RSP5	rsp5-sm1	TSA	0.956185	0.933987	0.945086	0.015696	-0.0814827
YER125W	RSP5	rsp5-1	TSA	1.06049	0.979713	1.0201	0.0571158	0.0287099
YER125W	RSP5	rsp5-3	TSA	1.33698	1.37677	1.35688	0.0281366	0.440291
YER128W	VFA1		DMA	1.16357	1.21109	1.18733	0.0336015	0.247727
YER129W	SAK1		DMA	1.28982	1.27306	1.28144	0.0118454	0.357765
YER130C	COM2		DMA	1.16581	1.00545	1.08563	0.113397	0.118532
YER131W	RPS26B		DMA	1.08178	1.00907	1.04543	0.0514204	0.0640897
YER132C	PMD1		DMA	1.07879	1.11181	1.0953	0.0233516	0.131326
YER133W	GLC7	glc7-10	TSA	0.817059	0.784918	0.800988	0.0227271	-0.320147
YER133W	GLC7	glc7-12	TSA	0.968952	1.00412	0.986539	0.0248709	-0.0195526
YER134C			DMA	1.01605	0.94034	0.978198	0.0535383	-0.0318023
YER135C			DMA	0.855695	0.863892	0.859793	0.00579652	-0.217938
YER136W	GDI1	gdi1-1	TSA	1.06595	1.35516	1.21056	0.204505	0.275673
YER137C			DMA	1.11858	1.09418	1.10638	0.0172563	0.145845
YER139C	RTR1		DMA	0.965091	0.952006	0.958548	0.00925244	-0.0610768
YER140W	EMP65		DMA	1.16456	1.0052	1.08488	0.112681	0.117536
YER142C	MAG1		DMA	1.20587	1.09013	1.148	0.0818436	0.199125
YER143W	DDI1		DMA	0.909133	0.65432	0.781726	0.18018	-0.355265
YER144C	UBP5		DMA	1.02931	1.08929	1.0593	0.0424174	0.0831109
YER145C	FTR1		DMA	0.857198	0.939215	0.898206	0.0579944	-0.154881
YER147C	SCC4	scc4-5001	TSA	1.03388	1.01932	1.0266	0.0102967	0.0378724
YER147C	SCC4	scc4-4	TSA	1.21311	1.14536	1.17923	0.0479015	0.237851
YER148W	SPT15	spt15-i143n	TSA	0.424765	0.702423	0.563594	0.196334	-0.827271	1
YER148W	SPT15	spt15-p65s	TSA	1.00804	1.0707	1.03937	0.0443027	0.0557071
YER149C	PEA2		DMA	0.960724	1.24747	1.1041	0.202761	0.142868
YER150W	SPI1		DMA	0.98657	0.933003	0.959787	0.0378772	-0.0592143
YER151C	UBP3		DMA	0.774696	0.724437	0.749566	0.0355386	-0.415872
YER152C			DMA	1.00243	1.05353	1.02798	0.0361337	0.0398073
YER153C	PET122		DMA	0.924385	0.78029	0.852337	0.101891	-0.230503
YER155C	BEM2		DMA	0.90568	1.02186	0.963771	0.0821521	-0.0532383
YER155C	BEM2		TSA	1.50799	1.58548	1.54674	0.0547954	0.629228
YER156C			DMA	0.911576	0.827198	0.869387	0.0596646	-0.201929
YER157W	COG3	cog3-1	TSA	0.880332	0.932549	0.906441	0.0369231	-0.141716
YER157W	COG3	cog3-2	TSA	1.24047	1.266	1.25323	0.0180469	0.325656
YER158C			DMA	1.04553	1.2151	1.13031	0.119902	0.176724
YER161C	SPT2		DMA	0.963834	0.889556	0.926695	0.0525227	-0.109834
YER161C	SPT2		TSA	1.30301	1.23157	1.26729	0.0505154	0.341743
YER162C	RAD4		DMA	0.90316	0.29142	0.59729	0.432566	-0.743497
YER163C	GCG1		DMA	1.13227	1.14857	1.14042	0.0115242	0.189564
YER164W	CHD1		DMA	1.06451	1.03557	1.05004	0.020462	0.0704458
YER166W	DNF1		DMA	1.03365	1.05472	1.04419	0.0149026	0.06238
YER167W	BCK2		DMA	0.978794	0.860925	0.919859	0.083346	-0.120515
YER168C	CCA1	cca1-1	TSA	0.135254	0.199804	0.167529	0.0456436	-2.57752
YER168C	CCA1	cca1-5001	TSA	1.13237	1.13761	1.13499	0.00370793	0.182681
YER170W	ADK2		DMA	1.05675	0.958722	1.00773	0.0693144	0.0111161
YER171W	RAD3	rad3-ts14	TSA	1.10234	1.01715	1.05974	0.0602431	0.0837156	1
YER173W	RAD24		DMA	1.08011	1.13661	1.10836	0.0399537	0.148428
YER174C	GRX4		DMA	1.18549	1.07078	1.12814	0.0811105	0.173944
YER175C	TMT1		DMA	1.04651	1.07686	1.06168	0.0214626	0.0863555
YER176W	ECM32		DMA	1.09792	1.11098	1.10445	0.00923434	0.143333
YER177W	BMH1		DMA	0.638378	0.988864	0.813621	0.247831	-0.297571
YER178W	PDA1		DMA	0.758418	0.867033	0.812726	0.0768026	-0.299159
YER179W	DMC1		DMA	1.36093	1.10862	1.23477	0.178409	0.304244
YER180C	ISC10		DMA	1.00116	1.14928	1.07522	0.104733	0.104629
YER181C			DMA	1.38223	1.25913	1.32068	0.0870425	0.40128
YER182W	FMP10		DMA	0.999313	1.10632	1.05282	0.0756658	0.0742544
YER183C	FAU1		DMA	1.12947	1.1366	1.13304	0.00504509	0.180194
YER184C	TOG1		DMA	1.06224	1.09936	1.0808	0.0262477	0.112095
YER185W	PUG1		DMA	1.12478	1.07718	1.10098	0.0336597	0.138783
YER186C			DMA	1.15132	1.04018	1.09575	0.0785841	0.131919
YER187W			DMA	1.17432	1.04771	1.11102	0.0895252	0.151881
YER188W			DMA	1.12868	0.991321	1.06	0.0971295	0.0840666
YFL001W	DEG1		DMA	0.838181	0.871149	0.854665	0.0233124	-0.226569
YFL001W	DEG1		TSA	1.04706	1.02695	1.03701	0.0142221	0.0524252
YFL003C	MSH4		DMA	1.17474	1.21306	1.1939	0.0270968	0.255678
YFL004W	VTC2		DMA	1.1967	1.09623	1.14646	0.0710435	0.197189
YFL005W	SEC4	sec4-8	TSA	1.06637	1.05816	1.06227	0.00580768	0.0871476
YFL006W			DMA	1.0176	1.28502	1.15131	0.189094	0.203276
YFL007W	BLM10		DMA	1.03166	1.08477	1.05822	0.0375519	0.0816329
YFL008W	SMC1	smc1-259	TSA	1.16584	1.0565	1.11117	0.0773152	0.152074
YFL008W	SMC1	smc1-2	TSA	1.21267	1.11247	1.16257	0.0708526	0.217317
YFL009W	CDC4	cdc4-2	TSA	0.254024	0.121559	0.187791	0.0936672	-2.4128
YFL009W	CDC4	cdc4-3	TSA	1.06303	1.05736	1.0602	0.00400894	0.0843323
YFL009W	CDC4	cdc4-1	TSA	1.18585	1.04755	1.1167	0.097791	0.159241
YFL010C	WWM1		DMA	0.953982	0.80641	0.880196	0.10435	-0.184103
YFL010W-A	AUA1		DMA	1.12455	0.988133	1.05634	0.0964645	0.0790794
YFL011W	HXT10		DMA	1.03863	1.16743	1.10303	0.0910732	0.141475
YFL012W			DMA	1.07897	1.0858	1.08239	0.00482899	0.114216
YFL013C	IES1		DMA	0.926282	0.94466	0.935471	0.0129949	-0.0962353
YFL013C	IES1		TSA	1.11191	1.16066	1.13628	0.0344731	0.184325
YFL013W-A			DMA	0.969479	0.911874	0.940676	0.0407331	-0.0882299
YFL014W	HSP12		DMA	1.08419	1.28215	1.18317	0.139982	0.242659
YFL015C			DMA	1.2047	1.04816	1.12643	0.110691	0.171761
YFL017C	GNA1	gna1-ts	TSA	1.00676	0.867548	0.937155	0.0984384	-0.0936409
YFL017C	GNA1	gna1-5001	TSA	1.27181	1.29254	1.28218	0.0146571	0.358594
YFL018C	LPD1		DMA	0.989528	0.996097	0.992813	0.00464491	-0.0104065
YFL019C			DMA	1.01077	1.14486	1.07781	0.0948212	0.108108
YFL020C	PAU5		DMA	1.20141	1.25264	1.22703	0.0362257	0.295168
YFL021W	GAT1		DMA	1.13677	1.05146	1.09411	0.0603196	0.129762
YFL022C	FRS2	frs2-5001	TSA	0.145176	0.190937	0.168057	0.0323585	-2.57298
YFL023W	BUD27		DMA	0.792002	0.766764	0.779383	0.0178456	-0.359596
YFL025C	BST1		DMA	1.05206	0.887677	0.969867	0.116234	-0.0441416
YFL026W	STE2		DMA	0.201636	0.233759	0.217697	0.0227146	-2.1996
YFL027C	GYP8		DMA	1.23651	1.39449	1.3155	0.111708	0.395607
YFL028C	CAF16		DMA	1.55126	1.50688	1.52907	0.0313785	0.612655
YFL029C	CAK1	cak1-23	TSA	1.03489	1.15456	1.09473	0.0846178	0.130569
YFL030W	AGX1		DMA	1.0499	1.23558	1.14274	0.131301	0.192497
YFL031W	HAC1		DMA	1.03193	1.1052	1.06856	0.051811	0.0956692
YFL031W	HAC1		TSA	1.39762	1.80655	1.60208	0.289162	0.67995
YFL032W			DMA	1.03622	1.02111	1.02866	0.0106851	0.0407725
YFL033C	RIM15		DMA	1.06853	1.08019	1.07436	0.00824061	0.103475
YFL034C-A	RPL22B		DMA	1.14256	1.1354	1.13898	0.0050621	0.187743
YFL034C-A	RPL22B		DMA	1.15258	1.2819	1.21724	0.0914445	0.283618
YFL034C-B	MOB2	mob2-26-supp1	TSA	0.821985	0.774808	0.798396	0.033359	-0.324823
YFL034C-B	MOB2	mob2-20	TSA	1.21207	0.834281	1.02317	0.267134	0.0330504
YFL034C-B	MOB2	mob2-11	TSA	0.91918	1.18166	1.05042	0.1856	0.0709651
YFL034C-B	MOB2	mob2-40	TSA	1.18436	1.06462	1.12449	0.0846691	0.169272
YFL034C-B	MOB2	mob2-36	TSA	1.11168	1.16889	1.14028	0.0404549	0.189391
YFL034C-B	MOB2	mob2-28	TSA	1.24912	1.03331	1.14122	0.152599	0.190575
YFL034C-B	MOB2	mob2-19	TSA	1.20855	1.10497	1.15676	0.0732429	0.210094
YFL034C-B	MOB2	mob2-8	TSA	1.29195	1.0408	1.16638	0.177593	0.222032
YFL034C-B	MOB2	mob2-38	TSA	1.18104	1.17541	1.17823	0.00398342	0.236619
YFL034C-B	MOB2	mob2-34	TSA	1.16183	1.29207	1.22695	0.0920919	0.29508
YFL034C-B	MOB2	mob2-24	TSA	1.29943	1.15771	1.22857	0.100208	0.296983
YFL034C-B	MOB2	mob2-22	TSA	1.27876	1.25217	1.26547	0.0188002	0.339671
YFL034C-B	MOB2	mob2-14	TSA	1.31909	1.39454	1.35681	0.0533537	0.440222
YFL034W	MIL1		DMA	1.1021	1.03667	1.06938	0.0462628	0.0967789
YFL036W	RPO41		DMA	0.679853	0.709338	0.694595	0.0208488	-0.525755
YFL037W	TUB2	tub2-443	TSA	1.3263	1.44287	1.38458	0.0824256	0.46945
YFL038C	YPT1	ypt1-3	TSA	1.28218	1.33184	1.30701	0.035113	0.386273
YFL039C	ACT1	act1-3	TSA	0.689058	0.684835	0.686946	0.0029859	-0.541731		1
YFL039C	ACT1	act1-105	TSA	0.747865	0.648726	0.698295	0.070102	-0.518091		1
YFL039C	ACT1	act1-125	TSA	0.781032	0.808405	0.794719	0.0193557	-0.331484		1
YFL039C	ACT1	act1-108	TSA	0.893445	0.795009	0.844227	0.0696045	-0.244297		1
YFL039C	ACT1	act1-132	TSA	0.951874	0.751273	0.851574	0.141846	-0.231797		1
YFL039C	ACT1	act1-121	TSA	1.03532	0.951536	0.993429	0.0592454	-0.00951081		1
YFL039C	ACT1	act1-129	TSA	0.762242	0.707703	0.734973	0.038565	-0.444237
YFL039C	ACT1	act1-155	TSA	0.764371	0.859816	0.812093	0.0674896	-0.300283
YFL039C	ACT1	act1-112	TSA	0.891793	0.779897	0.835845	0.0791225	-0.258693
YFL039C	ACT1	act1-136	TSA	0.840344	0.85482	0.847582	0.0102365	-0.238575
YFL039C	ACT1	act1-120	TSA	0.931996	0.793128	0.862562	0.0981944	-0.2133
YFL039C	ACT1	act1-4	TSA	0.851257	0.908292	0.879774	0.0403298	-0.184795
YFL039C	ACT1	act1-133	TSA	0.927033	0.907239	0.917136	0.0139965	-0.124793
YFL039C	ACT1	act1-2	TSA	0.973431	0.968651	0.971041	0.00337977	-0.0423959
YFL039C	ACT1	act1-159	TSA	1.05131	1.01132	1.03132	0.028281	0.0444858
YFL039C	ACT1	act1-124	TSA	1.12626	1.05721	1.09174	0.0488251	0.126627
YFL039C	ACT1	act1-122	TSA	1.05463	1.13275	1.09369	0.0552371	0.129203
YFL039C	ACT1	act1-101	TSA	1.12725	1.08633	1.10679	0.0289354	0.146383
YFL039C	ACT1	act1-111	TSA	1.1603	1.19253	1.17641	0.0227891	0.234396
YFL039C	ACT1	act1-119	TSA	1.29629	1.29871	1.2975	0.00171577	0.375734
YFL040W			DMA	1.11533	1.1426	1.12896	0.0192861	0.175001
YFL041W	FET5		DMA	1.48403	1.1755	1.32977	0.218161	0.411173
YFL042C	LAM5		DMA	1.33657	1.38886	1.36271	0.0369754	0.446482
YFL043C			DMA	1.44367	1.53296	1.48832	0.0631344	0.573682
YFL044C	OTU1		DMA	1.28433	1.18104	1.23268	0.0730351	0.301801
YFL045C	SEC53	sec53-6	TSA	1.04593	1.04994	1.04794	0.00283154	0.0675511
YFL046W	FMP32		DMA	0.994873	0.958412	0.976643	0.0257819	-0.0340974
YFL047W	RGD2		DMA	1.06109	1.02443	1.04276	0.025923	0.0604132
YFL048C	EMP47		DMA	1.16596	1.15321	1.15959	0.00901731	0.213612
YFL049W	SWP82		DMA	1.09664	1.07828	1.08746	0.0129784	0.120965
YFL050C	ALR2		DMA	1.08062	1.10926	1.09494	0.0202511	0.130855
YFL051C			DMA	1.11627	1.11086	1.11356	0.00382148	0.155183
YFL052W	ZNF1		DMA	1.24348	1.12748	1.18548	0.0820213	0.245468
YFL053W	DAK2		DMA	1.38258	1.12833	1.25546	0.17978	0.32821
YFL054C			DMA	1.2819	1.33775	1.30983	0.0394886	0.389376
YFL055W	AGP3		DMA	1.12787	1.12937	1.12862	0.00105913	0.174561
YFL056C	AAD6		DMA	1.03818	1.16127	1.09972	0.0870446	0.137143
YFL063W			DMA	1.1182	1.25839	1.18829	0.0991322	0.248891
YFR004W	RPN11	rpn11-14	TSA	0.999976	0.956284	0.97813	0.0308951	-0.031902
YFR004W	RPN11	rpn11-8	TSA	0.97258	1.00399	0.988284	0.0222094	-0.0170017
YFR005C	SAD1	sad1-1	TSA	1.05175	1.03059	1.04117	0.0149628	0.0582092
YFR006W			DMA	1.07463	1.06505	1.06984	0.00677487	0.0973984
YFR007W	YFH7		DMA	0.998155	1.01381	1.00598	0.0110733	0.00860841
YFR008W	FAR7		DMA	1.05016	1.05302	1.05159	0.00202308	0.072574
YFR009W	GCN20		DMA	1.04709	0.944561	0.995827	0.0725003	-0.00603359
YFR010W	UBP6		DMA	0.897567	0.842468	0.870017	0.0389609	-0.200884
YFR011C	MIC19		DMA	1.07133	1.07965	1.07549	0.00588208	0.104999
YFR027W	ECO1	eco1-1	TSA	1.20988	1.23943	1.22466	0.0208916	0.292378
YFR028C	CDC14	cdc14-8	TSA	1.1739	1.21094	1.19242	0.0261913	0.253896
YFR028C	CDC14	cdc14-2	TSA	1.23947	1.30077	1.27012	0.0433475	0.344963
YFR028C	CDC14	cdc14-3	TSA	1.2248	1.40379	1.31429	0.12657	0.394288
YFR028C	CDC14	cdc14-1	TSA	1.32487	1.32743	1.32615	0.00181672	0.407244
YFR031C	SMC2	smc2-8	TSA	1.0282	0.494617	0.761408	0.377299	-0.393259
YFR032C-A	RPL29		TSA	0.95668	1.08277	1.01972	0.0891594	0.0281801
YFR036W	CDC26	cdc26-1	TSA	1.33666	1.38754	1.3621	0.0359809	0.445833
YFR037C	RSC8	rsc8-ts21	TSA	1.11175	1.1565	1.13412	0.0316441	0.181575
YFR037C	RSC8	rsc8-ts16	TSA	1.18972	1.2337	1.21171	0.0311003	0.27704
YFR050C	PRE4	pre4-5001	TSA	0.944072	1.0353	0.989684	0.0645058	-0.0149595
YFR051C	RET2	ret2-1	TSA	1.12718	1.17847	1.15283	0.0362631	0.205174
YFR052W	RPN12	rpn12-1	TSA	0.962953	0.894199	0.928576	0.0486164	-0.106907
YGL001C	ERG26	erg26-1	TSA	1.45577	1.12661	1.29119	0.232745	0.368702
YGL011C	SCL1	scl1-5001	TSA	0.972301	1.0556	1.01395	0.0589001	0.0199866
YGL022W	STT3	stt3-2	TSA	0.842537	0.765465	0.804001	0.0544981	-0.314731		1
YGL022W	STT3	stt3-7	TSA	0.826926	0.821662	0.824294	0.0037216	-0.278769		1
YGL022W	STT3	stt3-1	TSA	0.798466	0.722749	0.760607	0.0535397	-0.394776
YGL029W	CGR1		DMA	0.7432	0.860423	0.801812	0.0828889	-0.318665
YGL037C	PNC1		DMA	1.09027	1.02197	1.05612	0.0482932	0.07877
YGL042C			DMA	0.976696	0.967938	0.972317	0.00619333	-0.0405013
YGL043W	DST1		TSA	1.04545	1.00551	1.02548	0.0282413	0.036301
YGL044C	RNA15	rna15-58	TSA	0.91901	0.976628	0.947819	0.0407422	-0.0773171
YGL045W	RIM8		TSA	1.03613	1.01175	1.02394	0.0172389	0.0341294
YGL047W	ALG13	alg13-5001	TSA	1.33187	1.22855	1.28021	0.073059	0.356384
YGL048C	RPT6	rpt6-1-supp1	TSA	0.903508	1.08869	0.996099	0.130944	-0.00563877
YGL048C	RPT6	rpt6-25	TSA	1.09349	1.02219	1.05784	0.0504211	0.08112
YGL048C	RPT6	rpt6-20	TSA	1.22162	1.21818	1.2199	0.00242986	0.286766
YGL049C	TIF4632		DMA	1.0522	1.09674	1.07447	0.0314934	0.103626
YGL055W	OLE1	ole1-m2	TSA	1.08046	1.03684	1.05865	0.0308409	0.0822277
YGL061C	DUO1	duo1-2	TSA	1.26287	1.31362	1.28825	0.0358839	0.365407
YGL063W	PUS2		DMA	1.08888	1.03346	1.06117	0.0391812	0.0856555
YGL065C	ALG2	alg2-1	TSA	1.0892	1.00559	1.0474	0.0591221	0.0668098
YGL066W	SGF73		TSA	1.00315	0.946249	0.974698	0.0402336	-0.0369726
YGL071W	AFT1		DMA	0.795963	1.10496	0.950463	0.218496	-0.0732973
YGL073W	HSF1	hsf1-848	TSA	0.981354	0.881281	0.931318	0.0707626	-0.102655		1
YGL075C	MPS2	mps2-2	TSA	0.407255	0.824532	0.615893	0.295059	-0.699248
YGL075C	MPS2	mps2-1	TSA	0.557544	1.18468	0.87111	0.443449	-0.199074
YGL091C	NBP35	nbp35-5001	TSA	0.963613	1.0059	0.984755	0.0298986	-0.0221636
YGL092W	NUP145	nup145-r4	TSA	1.27604	1.20694	1.24149	0.0488634	0.312076
YGL093W	SPC105	spc105-4	TSA	1.06129	1.15369	1.10749	0.0653362	0.147294
YGL093W	SPC105	spc105-15	TSA	1.15733	1.24649	1.20191	0.0630465	0.265326
YGL094C	PAN2		DMA	1.1288	1.19258	1.16069	0.0450986	0.214983
YGL096W	TOS8		DMA	1.04212	0.955543	0.998831	0.0612176	-0.00168777
YGL097W	SRM1	srm1-g282s	TSA	0.158361	0.52045	0.339405	0.256036	-1.55892
YGL097W	SRM1	srm1-ts	TSA	0.914673	0.699314	0.806993	0.152282	-0.309371
YGL098W	USE1	use1-ts	TSA	1.18045	1.27189	1.22617	0.0646582	0.294161
YGL112C	TAF6	taf6-ts	TSA	1.07962	1.10832	1.09397	0.0202957	0.129569
YGL113W	SLD3	sld3-5001	TSA	1.01814	0.994332	1.00623	0.0168329	0.0089667	1
YGL115W	SNF4		TSA	1.35988	1.27011	1.315	0.063478	0.395061
YGL116W	CDC20	cdc20-1	TSA	0.68535	0.743947	0.714648	0.0414345	-0.484695
YGL116W	CDC20	cdc20-3	TSA	1.32465	1.27919	1.30192	0.0321507	0.380642
YGL116W	CDC20	cdc20-2	TSA	1.36461	1.30392	1.33426	0.042914	0.416041
YGL120C	PRP43	prp43-ts2	TSA	1.06981	1.06781	1.06881	0.00141396	0.0960013		1
YGL130W	CEG1	ceg1-c354	TSA	0.618992	0.96246	0.790726	0.242869	-0.33875
YGL130W	CEG1	ceg1-3	TSA	0.952007	0.933922	0.942964	0.0127878	-0.0847247
YGL130W	CEG1	ceg1-ts	TSA	1.10036	1.04494	1.07265	0.0391857	0.10118
YGL130W	CEG1	ceg1-34	TSA	1.28602	1.20668	1.24635	0.0561072	0.31771
YGL137W	SEC27	sec27-1	TSA	1.13265	1.01751	1.07508	0.081412	0.104445
YGL142C	GPI10	gpi10-5001	TSA	0.738669	0.612522	0.675595	0.0891995	-0.565769		1
YGL145W	TIP20	tip20-5	TSA	1.31083	1.29384	1.30233	0.0120139	0.381096
YGL151W	NUT1		TSA	1.09927	1.15901	1.12914	0.0422406	0.175228
YGL155W	CDC43	cdc43-2	TSA	1.22873	1.17326	1.20099	0.0392241	0.264226
YGL163C	RAD54		TSA	1.14454	1.3225	1.23352	0.125831	0.30278
YGL174W	BUD13		TSA	0.998539	1.06398	1.03126	0.0462755	0.0444093
YGL207W	SPT16	spt16-ts	TSA	1.22855	1.28048	1.25451	0.0367151	0.327128
YGL213C	SKI8		TSA	1.2124	1.18033	1.19636	0.0226755	0.258657
YGL219C	MDM34	mdm34-supp1	TSA	1.04635	1.13822	1.09228	0.0649589	0.127349
YGL233W	SEC15	sec15-1	TSA	0.854171	0.826219	0.840195	0.0197648	-0.251204		1
YGL245W	GUS1	gus1-5001	TSA	1.25322	1.36273	1.30797	0.0774351	0.387334
YGL247W	BRR6	brr6-5001	TSA	0.454588	0.444698	0.449643	0.00699306	-1.15315
YGL255W	ZRT1		TSA	1.22373	1.08571	1.15472	0.0975969	0.207547
YGR002C	SWC4	swc4-4	TSA	0.960534	1.01409	0.987314	0.0378731	-0.0184189		1
YGR005C	TFG2	tfg2-5001	TSA	1.34576	1.26268	1.30422	0.0587501	0.383189
YGR006W	PRP18	prp18-1202	TSA	0.835249	0.815483	0.825366	0.0139768	-0.276894
YGR006W	PRP18	prp18-ts	TSA	1.07739	0.963723	1.02056	0.0803762	0.0293577
YGR009C	SEC9	sec9-4	TSA	1.06773	0.315013	0.691373	0.532253	-0.532463
YGR013W	SNU71	snu71-5001	TSA	1.33442	1.34684	1.34063	0.00878256	0.422915
YGR034W	RPL26B		TSA	1.1977	1.16807	1.18289	0.0209481	0.242311
YGR047C	TFC4	tfc4-5001	TSA	1.29902	1.26999	1.2845	0.020532	0.361211
YGR048W	UFD1	ufd1-2	TSA	1.30963	1.21279	1.26121	0.0684775	0.334809
YGR055W	MUP1		DMA	1.36357	1.00068	1.18212	0.256603	0.241381
YGR061C	ADE6		DMA	1.06352	1.16711	1.11532	0.07325	0.157452
YGR067C			DMA	0.925928	1.08104	1.00348	0.10968	0.00501716
YGR068C	ART5		DMA	1.02342	1.22455	1.12399	0.14222	0.168627
YGR074W	SMD1	smd1-1	TSA	0.398413	0.201229	0.299821	0.139431	-1.73783
YGR075C	PRP38	prp38-1	TSA	1.44999	1.34622	1.3981	0.0733753	0.483468
YGR081C	SLX9		TSA	0.974112	0.996124	0.985118	0.0155644	-0.0216318
YGR091W	PRP31	prp31-1	TSA	1.13883	1.21427	1.17655	0.0533443	0.234559
YGR091W	PRP31	prp31-ts	TSA	1.28489	1.25876	1.27182	0.0184725	0.3469
YGR092W	DBF2		TSA	1.04589	0.930482	0.988184	0.0816023	-0.0171489
YGR092W	DBF2	dbf2-3	TSA	1.02971	1.15843	1.09407	0.0910155	0.129706
YGR092W	DBF2	dbf2-2	TSA	1.24252	1.21041	1.22647	0.0227077	0.294506
YGR092W	DBF2	dbf2-1	TSA	1.31286	1.54667	1.42977	0.165329	0.51578
YGR094W	VAS1	vas1-5001	TSA	1.2803	1.31943	1.29987	0.0276659	0.378362
YGR098C	ESP1	esp1-1	TSA	1.17683	1.18262	1.17973	0.00409493	0.238454
YGR099W	TEL2	tel2-15	TSA	1.19238	1.14639	1.16938	0.0325139	0.22575
YGR099W	TEL2	tel2-7	TSA	1.32852	1.35213	1.34032	0.0166905	0.422581
YGR101W	PCP1		TSA	0.944062	0.753866	0.848964	0.134489	-0.236225
YGR103W	NOP7	nop7-1	TSA	1.1485	1.17573	1.16212	0.0192508	0.216756
YGR113W	DAM1	dam1-19	TSA	0.837502	0.840252	0.838877	0.001945	-0.253469		1
YGR113W	DAM1	dam1-9	TSA	1.32575	1.23264	1.2792	0.0658385	0.355241
YGR113W	DAM1	dam1-11	TSA	1.28926	1.27495	1.28211	0.0101179	0.358519
YGR113W	DAM1	dam1-5	TSA	1.28841	1.28257	1.28549	0.00412273	0.362318
YGR113W	DAM1	dam1-1	TSA	1.37438	1.77685	1.57562	0.284592	0.655915
YGR116W	SPT6	spt6-14	TSA	1.06161	0.679856	0.870733	0.26994	-0.199698
YGR119C	NUP57	nup57-e17	TSA	0.803067	0.61923	0.711149	0.129993	-0.491777
YGR120C	COG2	cog2-1	TSA	1.27531	1.31005	1.29268	0.0245629	0.370365
YGR122C-A			DMA	1.12863	1.13901	1.13382	0.00734507	0.181192
YGR122W			DMA	0.83025	0.932004	0.881127	0.0719511	-0.182579
YGR122W			TSA	1.03951	1.12725	1.08338	0.0620371	0.115538
YGR125W			TSA	1.35111	1.30239	1.32675	0.0344502	0.407895
YGR135W	PRE9		TSA	1.15177	1.17941	1.16559	0.0195461	0.221059
YGR140W	CBF2	cbf2-1	TSA	1.26495	1.18248	1.22371	0.058312	0.291267
YGR140W	CBF2	cbf2-42	TSA	1.24366	1.24863	1.24614	0.00351531	0.317471
YGR140W	CBF2	cbf2-2	TSA	1.31441	1.31631	1.31536	0.00134117	0.395455
YGR156W	PTI1	pti1-ts1-supp1	TSA	1.13585	1.13369	1.13477	0.00152839	0.182397
YGR156W	PTI1	pti1-ts7-supp1	TSA	1.21142	1.27293	1.24218	0.0434931	0.312869
YGR158C	MTR3	mtr3-ts	TSA	0.625214	0.619742	0.622478	0.00386952	-0.683905
YGR163W	GTR2		DMA	0.979196	1.06615	1.02267	0.0614876	0.0323468
YGR164W			DMA	1.07251	1.11086	1.09168	0.0271119	0.126555
YGR166W	TRS65		DMA	1.0534	1.12627	1.08984	0.0515223	0.12411
YGR168C			DMA	1.15471	1.10737	1.13104	0.0334734	0.177652
YGR169C	PUS6		DMA	1.11799	1.0052	1.0616	0.0797491	0.0862342
YGR170W	PSD2		DMA	1.05913	1.03813	1.04863	0.0148505	0.0685023
YGR172C	YIP1	yip1-5001	TSA	1.19235	1.29747	1.24491	0.0743273	0.316042
YGR172C	YIP1	yip1-4	TSA	1.22656	1.37099	1.29878	0.102131	0.377152
YGR172C	YIP1	yip1-40	TSA	1.29207	1.32684	1.30945	0.024585	0.388964
YGR173W	RBG2		DMA	1.13627	1.06687	1.10157	0.0490722	0.139558
YGR174C	CBP4		DMA	0.988088	1.02567	1.00688	0.0265766	0.00989267
YGR176W			DMA	1.04349	1.11361	1.07855	0.0495776	0.109094
YGR177C	ATF2		DMA	0.935104	1.10854	1.02182	0.122638	0.0311433
YGR178C	PBP1		DMA	1.02172	1.13219	1.07695	0.0781101	0.106957
YGR179C	OKP1	okp1-5	TSA	1.18147	1.29512	1.23829	0.0803623	0.308354
YGR181W	TIM13		DMA	1.10881	1.17598	1.14239	0.0474912	0.192061
YGR182C			DMA	1.07296	1.02626	1.04961	0.0330224	0.0698591
YGR183C	QCR9		DMA	0.984518	0.915927	0.950223	0.0485013	-0.0736624
YGR184C	UBR1		DMA	1.06557	1.08357	1.07457	0.0127287	0.103758
YGR185C	TYS1	tys1-1	TSA	1.06259	1.18753	1.12506	0.0883502	0.17
YGR187C	HGH1		DMA	1.07303	0.945586	1.00931	0.0901168	0.0133674
YGR188C	BUB1		DMA	0.867605	0.893663	0.880634	0.018426	-0.183385
YGR189C	CRH1		DMA	1.15337	1.03027	1.09182	0.087048	0.126733
YGR192C	TDH3		DMA	1.15271	0.931393	1.04205	0.156494	0.0594252
YGR193C	PDX1		DMA	0.999195	1.14557	1.07239	0.103506	0.100823
YGR194C	XKS1		DMA	0.996894	0.951666	0.97428	0.0319806	-0.0375914
YGR195W	SKI6	ski6-5001	TSA	0.542204	0.765841	0.654023	0.158135	-0.612587	1
YGR196C	FYV8		DMA	1.14411	1.03092	1.08752	0.0800431	0.121035
YGR197C	SNG1		DMA	1.30666	1.19296	1.24981	0.0803966	0.321707
YGR199W	PMT6		DMA	1.11779	1.21949	1.16864	0.071916	0.224833
YGR200C	ELP2		DMA	0.914752	0.894256	0.904504	0.0144929	-0.144801
YGR201C			DMA	1.0537	1.21723	1.13546	0.115637	0.183283
YGR202C	PCT1		DMA	1.2846	0.241415	0.763006	0.737641	-0.390234
YGR203W	YCH1		DMA	1.08271	1.09097	1.08684	0.00583948	0.120142
YGR205W	TDA10		DMA	1.11826	1.18265	1.15046	0.0455331	0.202205
YGR206W	MVB12		DMA	1.07493	1.06687	1.0709	0.00570068	0.0988226
YGR207C	CIR1		DMA	1.02635	1.03405	1.0302	0.00544061	0.0429262
YGR208W	SER2		DMA	1.03636	1.06827	1.05232	0.0225648	0.0735708
YGR209C	TRX2		DMA	1.0673	0.936374	1.00183	0.0925755	0.00264395
YGR210C			DMA	1.0664	1.2044	1.1354	0.0975757	0.183202
YGR211W	ZPR1	zpr1-1	TSA	1.01578	0.802949	0.909362	0.150491	-0.137073
YGR212W	SLI1		DMA	1.27487	1.12204	1.19846	0.108068	0.26118
YGR213C	RTA1		DMA	1.11325	1.05048	1.08187	0.0443846	0.113526
YGR214W	RPS0A		DMA	0.990475	0.96369	0.977083	0.0189396	-0.0334473
YGR216C	GPI1	gpi1-1	TSA	1.33697	1.39896	1.36797	0.0438398	0.452032
YGR217W	CCH1		DMA	1.0061	1.11132	1.05871	0.0744	0.0823105
YGR218W	CRM1	crm1-1	TSA	1.02604	1.05617	1.0411	0.0213039	0.0581145
YGR221C	TOS2		DMA	1.10128	1.02168	1.06148	0.056289	0.0860784
YGR223C	HSV2		DMA	0.988127	1.08025	1.03419	0.0651422	0.0485003
YGR224W	AZR1		DMA	1.18541	1.04893	1.11717	0.0965081	0.159846
YGR225W	AMA1		DMA	1.11881	1.0537	1.08626	0.046044	0.119363
YGR226C			DMA	0.938974	0.995329	0.967151	0.0398493	-0.0481866
YGR227W	DIE2		DMA	0.925998	1.11076	1.01838	0.130647	0.0262756
YGR228W			DMA	1.05952	1.10219	1.08086	0.0301722	0.11218
YGR229C	SMI1		TSA	1.03935	0.243775	0.641561	0.562554	-0.640342
YGR229C	SMI1		DMA	0.968879	0.893987	0.931433	0.0529569	-0.102476
YGR230W	BNS1		DMA	1.1751	1.16122	1.16816	0.00981755	0.224237
YGR231C	PHB2		DMA	0.782645	0.884513	0.833579	0.0720319	-0.262609
YGR232W	NAS6		DMA	1.15567	1.11302	1.13434	0.0301581	0.181857
YGR233C	PHO81		DMA	1.07853	1.16176	1.12014	0.058854	0.163684
YGR234W	YHB1		DMA	1.14775	1.12545	1.1366	0.015773	0.184725
YGR235C	MIC26		DMA	1.02031	1.12404	1.07217	0.0733473	0.10054
YGR236C	SPG1		DMA	1.04837	1.07243	1.0604	0.0170166	0.0846087
YGR237C			DMA	1.08192	0.980672	1.0313	0.0715937	0.0444593
YGR238C	KEL2		DMA	0.997249	1.00893	1.00309	0.00825952	0.00445001
YGR239C	PEX21		DMA	1.03297	1.0552	1.04409	0.0157164	0.0622418
YGR241C	YAP1802		DMA	1.0497	1.15041	1.10006	0.0712125	0.137576
YGR242W			DMA	1.07764	1.11699	1.09732	0.027821	0.13398
YGR243W	MPC3		DMA	1.21137	1.14563	1.1785	0.0464829	0.23695
YGR244C	LSC2		DMA	1.16727	1.09261	1.12994	0.0527968	0.176247
YGR245C	SDA1	sda1-2	TSA	1.19167	1.25952	1.22559	0.047977	0.293482
YGR246C	BRF1	brf1-w107r	TSA	0.971459	1.01901	0.995234	0.0336232	-0.00689188
YGR247W	CPD1		DMA	1.08361	1.11586	1.09974	0.0227986	0.137157
YGR248W	SOL4		DMA	1.07731	0.979777	1.02854	0.0689674	0.0406038
YGR249W	MGA1		DMA	1.13176	1.05696	1.09436	0.0528942	0.130089
YGR250C			DMA	1.00832	0.939819	0.97407	0.0484382	-0.0379033
YGR253C	PUP2	pup2-5001	TSA	1.13589	1.29834	1.21712	0.114868	0.283467
YGR254W	ENO1		DMA	0.957254	1.16893	1.06309	0.149677	0.0882662
YGR255C	COQ6		DMA	0.930687	1.34042	1.13555	0.289726	0.183396
YGR256W	GND2		DMA	0.928216	0.962071	0.945144	0.0239393	-0.0813947
YGR259C			DMA	0.916328	1.02035	0.96834	0.0735558	-0.046414
YGR260W	TNA1		DMA	0.934852	0.981028	0.95794	0.0326516	-0.0619927
YGR261C	APL6		DMA	1.15542	1.05406	1.10474	0.0716701	0.143707
YGR263C	SAY1		DMA	1.0846	1.09264	1.08862	0.00568568	0.122497
YGR264C	MES1	mes1-1	TSA	0.899869	0.858249	0.879059	0.0294303	-0.185968
YGR266W			DMA	1.09267	0.991363	1.04202	0.0716328	0.0593764
YGR268C	HUA1		DMA	1.02082	0.951499	0.98616	0.0490176	-0.0201069
YGR269W			DMA	1.05169	1.13039	1.09104	0.05565	0.125703
YGR270W	YTA7		DMA	0.768507	0.678164	0.723335	0.0638818	-0.467263
YGR270W	YTA7		TSA	0.895004	0.929497	0.912251	0.0243899	-0.132498
YGR271W	SLH1		DMA	0.992351	1.09593	1.04414	0.0732412	0.0623152
YGR272C			DMA	1.05677	0.864308	0.960538	0.13609	-0.058085
YGR273C			DMA	1.16255	1.05877	1.11066	0.0733838	0.15142
YGR274C	TAF1	taf1-2	TSA	1.13411	1.16008	1.14709	0.0183692	0.197984
YGR274C	TAF1	taf1-1	TSA	1.2939	1.34725	1.32058	0.0377234	0.401171
YGR275W	RTT102		DMA	0.945253	1.01606	0.980659	0.0500714	-0.0281764
YGR276C	RNH70		DMA	1.2462	1.4688	1.3575	0.1574	0.440954
YGR277C	CAB4	cab4-5001	TSA	0.474257	0.681432	0.577845	0.146494	-0.791247
YGR278W	CWC22	cwc22-5001	TSA	1.31671	1.24357	1.28014	0.0517184	0.3563
YGR279C	SCW4		DMA	0.941179	0.933726	0.937452	0.00527026	-0.0931826
YGR281W	YOR1		DMA	0.968308	0.899695	0.934002	0.0485168	-0.098503
YGR282C	BGL2		DMA	0.948327	0.997675	0.973001	0.0348938	-0.0394869
YGR283C			DMA	1.04473	0.974966	1.00985	0.0493296	0.0141367
YGR284C	ERV29		DMA	1.04618	1.10039	1.07328	0.0383331	0.102032
YGR286C	BIO2		DMA	0.945948	1.10834	1.02714	0.114828	0.0386375
YGR287C	IMA1		DMA	1.02943	1.08267	1.05605	0.037646	0.0786835
YGR288W	MAL13		DMA	1.30482	1.25552	1.28017	0.0348632	0.356337
YGR289C	MAL11		DMA	1.03534	1.0978	1.06657	0.0441609	0.0929783
YGR290W			DMA	1.10008	1.17504	1.13756	0.0530068	0.185942
YGR291C			DMA	1.85725	1.06107	1.45916	0.56298	0.545139
YGR292W	MAL12		DMA	1.21576	1.16095	1.18836	0.0387538	0.248969
YGR295C	COS6		DMA	1.01382	1.01849	1.01615	0.00330249	0.02312
YHL002W	HSE1		DMA	1.12094	1.05545	1.08819	0.0463116	0.121936
YHL003C	LAG1		DMA	0.930693	1.06156	0.996127	0.0925371	-0.00559881
YHL005C			DMA	1.04436	1.04085	1.0426	0.00248435	0.0601909
YHL006C	SHU1		DMA	1.24665	1.02225	1.13445	0.158671	0.181994
YHL007C	STE20		DMA	1.05893	0.298315	0.678621	0.537833	-0.559323
YHL008C			DMA	1.18417	1.11084	1.1475	0.0518514	0.198498
YHL009C	YAP3		DMA	1.09422	1.16728	1.13075	0.0516611	0.177285
YHL010C	ETP1		DMA	1.11108	1.07251	1.0918	0.0272744	0.126707
YHL012W			DMA	1.24015	0.909948	1.07505	0.233491	0.104406
YHL013C	OTU2		DMA	0.811748	0.81507	0.813409	0.00234922	-0.297948
YHL014C	YLF2		DMA	1.0949	0.969444	1.03217	0.0887092	0.0456816
YHL016C	DUR3		DMA	1.0721	1.03667	1.05438	0.0250516	0.0764
YHL017W			DMA	1.02242	1.01197	1.01719	0.00738357	0.0245954
YHL019C	APM2		DMA	1.03335	1.06248	1.04792	0.0205936	0.0675229
YHL020C	OPI1		DMA	0.790273	0.859089	0.824681	0.0486602	-0.278093
YHL021C	AIM17		DMA	0.754887	0.924327	0.839607	0.119812	-0.252213
YHL022C	SPO11		DMA	1.12648	1.16173	1.1441	0.0249238	0.194219
YHL023C	NPR3		DMA	1.02089	0.947676	0.984281	0.0517674	-0.0228578
YHL024W	RIM4		DMA	1.10084	1.16356	1.1322	0.0443489	0.179127
YHL025W	SNF6		DMA	0.988354	0.999894	0.994124	0.00816006	-0.00850214
YHL026C			DMA	1.01475	0.986993	1.00087	0.0196251	0.00125463
YHL027W	RIM101		DMA	0.940746	0.700261	0.820504	0.170049	-0.285419
YHL028W	WSC4		DMA	1.06961	1.17166	1.12063	0.0721578	0.164315
YHL029C	OCA5		DMA	0.96988	1.05225	1.01107	0.0582468	0.0158784
YHL030W	ECM29		DMA	0.901273	0.845283	0.873278	0.0395907	-0.195487
YHL031C	GOS1		DMA	0.779611	0.807975	0.793793	0.020056	-0.333165
YHL032C	GUT1		DMA	1.05666	1.26474	1.1607	0.147136	0.214992
YHL033C	RPL8A		DMA	0.84587	0.923558	0.884714	0.0549335	-0.176717
YHL034C	SBP1		DMA	0.980672	0.999001	0.989837	0.0129606	-0.0147375
YHL035C	VMR1		DMA	1.13193	1.23459	1.18326	0.072587	0.242766
YHL036W	MUP3		DMA	1.00203	1.22543	1.11373	0.157966	0.155399
YHL037C			DMA	1.18131	1.07304	1.12717	0.0765562	0.17271
YHL039W	EFM1		DMA	0.987251	1.05909	1.02317	0.0508013	0.0330502
YHL040C	ARN1		DMA	1.05115	1.08912	1.07014	0.0268518	0.0977957
YHL041W			DMA	1.14208	1.08702	1.11455	0.0389352	0.156457
YHL042W			DMA	1.08428	0.990738	1.03751	0.0661417	0.0531211
YHL043W	ECM34		DMA	1.12113	0.970321	1.04573	0.106639	0.064505
YHL044W			DMA	1.05713	1.08405	1.07059	0.0190374	0.09841
YHL045W			DMA	0.999834	1.09352	1.04668	0.0662439	0.0658141
YHL046C	PAU13		DMA	0.990054	0.968362	0.979208	0.0153381	-0.0303127
YHL047C	ARN2		DMA	1.12882	1.06491	1.09686	0.0451849	0.133386
YHR001W-A	QCR10		DMA	1.03787	1.07358	1.05572	0.0252502	0.078232
YHR003C	TCD1		DMA	0.999867	0.923695	0.961781	0.0538613	-0.0562195
YHR004C	NEM1		DMA	1.07396	0.945991	1.00998	0.0904877	0.0143209
YHR005C	GPA1		DMA	0.356613	0.346452	0.351533	0.00718518	-1.50827
YHR005C	GPA1	gpa1-ts	TSA	0.867706	1.05237	0.960041	0.13058	-0.0588328
YHR006W	STP2		DMA	0.963024	1.07549	1.01926	0.0795272	0.0275196
YHR007C	ERG11	erg11-td	TSA	0.875642	0.880332	0.877987	0.00331636	-0.187728	1
YHR008C	SOD2		DMA	1.01046	0.94797	0.979215	0.0441869	-0.0303027
YHR009C	TDA3		DMA	0.961438	0.943025	0.952231	0.0130197	-0.0706158
YHR012W	VPS29		DMA	0.9019	0.92384	0.91287	0.0155136	-0.131518
YHR012W	VPS29		TSA	1.17371	1.1242	1.14896	0.0350101	0.200325
YHR014W	SPO13		DMA	1.11728	1.09282	1.10505	0.0172954	0.144115
YHR015W	MIP6		DMA	1.02986	1.08143	1.05564	0.0364642	0.0781203
YHR016C	YSC84		DMA	1.2438	1.10792	1.17586	0.0960838	0.233719
YHR017W	YSC83		DMA	1.10485	1.11587	1.11036	0.0077938	0.151025
YHR018C	ARG4		DMA	0.572266	0.570264	0.571265	0.00141622	-0.807768
YHR019C	DED81	ded81-5001	TSA	1.20364	1.1996	1.20162	0.00285735	0.264977
YHR020W		yhr020w-5001	TSA	1.21779	1.31455	1.26617	0.0684141	0.340472
YHR021C	RPS27B		DMA	0.754127	0.820124	0.787126	0.0466668	-0.345334
YHR021W-A	ECM12		DMA	1.11262	1.12355	1.11808	0.00772607	0.161029
YHR022C			DMA	1.01285	0.95658	0.984715	0.0397885	-0.0222221
YHR024C	MAS2	mas2-10	TSA	1.22337	1.27606	1.24971	0.0372531	0.321597
YHR025W	THR1		DMA	0.802792	0.711245	0.757019	0.0647331	-0.401599		1
YHR027C	RPN1	rpn1-821	TSA	1.13806	0.996759	1.06741	0.0999155	0.0941147
YHR028C	DAP2		DMA	0.973859	0.902415	0.938137	0.0505187	-0.0921294
YHR029C	YHI9		DMA	1.0315	1.02714	1.02932	0.00308523	0.0416927
YHR030C	SLT2		DMA	1.02337	1.11669	1.07003	0.0659836	0.0976543		1
YHR030C	SLT2		TSA	1.17632	1.20236	1.18934	0.0184103	0.250161
YHR030C	SLT2		TSA	1.16189	1.21921	1.19055	0.0405364	0.251629
YHR030C	SLT2		TSA	1.27687	1.32563	1.30125	0.0344763	0.379902
YHR031C	RRM3		DMA	0.960118	1.02723	0.993674	0.0474556	-0.009155
YHR032W	ERC1		DMA	1.14059	1.10903	1.12481	0.022316	0.169681
YHR033W			DMA	1.04723	0.966849	1.00704	0.0568396	0.0101223
YHR034C	PIH1		DMA	0.957869	0.959702	0.958785	0.00129559	-0.0607202
YHR034C	PIH1		TSA	1.25319	1.27484	1.26402	0.0153081	0.338018
YHR035W	NEL1		DMA	1.07637	1.06578	1.07107	0.00748464	0.0990569
YHR036W	BRL1	brl1-k405i	TSA	1.11946	1.12285	1.12116	0.00239573	0.164988	1
YHR036W	BRL1	brl1-2221	TSA	1.08802	0.96913	1.02857	0.0840673	0.0406465
YHR036W	BRL1	brl1-3231	TSA	1.09024	1.06922	1.07973	0.0148607	0.110669
YHR036W	BRL1	brl1-c371s	TSA	1.07558	1.1458	1.11069	0.0496525	0.151457
YHR036W	BRL1	brl1-c371r	TSA	1.18009	1.09776	1.13893	0.0582175	0.187674
YHR037W	PUT2		DMA	1.00258	0.905221	0.953903	0.0688463	-0.0680853
YHR039C	MSC7		DMA	0.961142	1.08842	1.02478	0.0899995	0.0353167
YHR040W	BCD1	bcd1-5001	TSA	1.18619	1.19557	1.19088	0.0066345	0.252028
YHR041C	SRB2		DMA	0.668832	0.707953	0.688392	0.0276627	-0.538697
YHR043C	DOG2		DMA	0.92488	0.928257	0.926568	0.00238806	-0.110031
YHR044C	DOG1		DMA	0.972543	0.959246	0.965894	0.00940289	-0.0500627
YHR045W			DMA	1.06963	1.12546	1.09755	0.0394759	0.134284
YHR046C	INM1		DMA	1.00252	0.981028	0.991773	0.0151952	-0.0119184
YHR047C	AAP1		DMA	1.0537	1.09155	1.07262	0.0267659	0.101144
YHR048W	YHK8		DMA	0.979777	1.10762	1.0437	0.0903989	0.0617051
YHR049C-A			DMA	1.15401	1.12228	1.13814	0.0224342	0.186683
YHR049W	FSH1		DMA	1.13239	1.08779	1.11009	0.0315421	0.150678
YHR050W	SMF2		DMA	1.01285	1.06156	1.0372	0.0344438	0.052701
YHR052W	CIC1	cic1-2	TSA	1.09513	1.04332	1.06922	0.0366349	0.0965593
YHR057C	CPR2		DMA	1.1405	1.01485	1.07767	0.0888499	0.107919
YHR058C	MED6	med6-5001	TSA	0.978214	0.287942	0.633078	0.488096	-0.659545	1
YHR058C	MED6	med6-ts	TSA	0.81794	0.755537	0.786739	0.0441256	-0.346043
YHR058C	MED6	med6-ts	TSA	0.995734	0.858727	0.92723	0.0968782	-0.109
YHR059W	FYV4		DMA	0.629518	0.210619	0.420069	0.296206	-1.2513
YHR061C	GIC1		DMA	0.669679	0.586045	0.627862	0.0591383	-0.67148
YHR065C	RRP3	rrp3-5001	TSA	0.997122	1.09653	1.04683	0.0702938	0.0660228
YHR066W	SSF1		DMA	0.876114	0.915548	0.895831	0.0278842	-0.158701
YHR066W	SSF1		TSA	1.03311	1.11862	1.07586	0.0604619	0.105494
YHR067W	HTD2		DMA	0.694444	0.670099	0.682272	0.0172148	-0.551582
YHR067W	HTD2		TSA	0.863278	0.873538	0.868408	0.00725468	-0.203555
YHR069C	RRP4	rrp4-1	TSA	0.786573	0.91194	0.849256	0.0886474	-0.235728
YHR073W	OSH3		DMA	1.29895	1.1842	1.24157	0.0811394	0.312168
YHR075C	PPE1		DMA	1.06488	0.982283	1.02358	0.0584061	0.0336268
YHR076W	PTC7		DMA	0.975373	1.21106	1.09322	0.166654	0.128578
YHR077C	NMD2		DMA	1.05043	1.07577	1.0631	0.0179169	0.0882763
YHR078W			DMA	1.14428	1.11568	1.12998	0.0202203	0.176294
YHR079C	IRE1		DMA	1.08888	1.04993	1.06941	0.0275373	0.0968091
YHR079C-A	SAE3		DMA	1.23727	1.05589	1.14658	0.128258	0.197336
YHR080C	LAM4		DMA	1.13455	1.20023	1.16739	0.0464405	0.223285
YHR081W	LRP1		DMA	0.737042	0.696784	0.716913	0.0284667	-0.48013
YHR082C	KSP1		DMA	1.17517	1.02277	1.09897	0.107764	0.136149
YHR083W	SAM35	sam35-2	TSA	1.31923	1.33415	1.32669	0.010554	0.407834
YHR085W	IPI1	ipi1-5001	TSA	0.872526	0.286083	0.579305	0.414678	-0.787606
YHR086W	NAM8		DMA	1.11649	1.0912	1.10385	0.0178796	0.14254
YHR087W	RTC3		DMA	1.01606	1.149	1.08253	0.0939973	0.114408
YHR088W	RPF1	rpf1-5001	TSA	1.02459	0.845806	0.935197	0.126418	-0.096658
YHR088W	RPF1	rpf1-1	TSA	1.17246	1.02332	1.09789	0.105464	0.134732
YHR092C	HXT4		DMA	1.16886	1.14694	1.1579	0.0154993	0.211507
YHR093W	AHT1		DMA	1.15318	1.31167	1.23242	0.112068	0.301496
YHR094C	HXT1		DMA	1.1705	1.13829	1.15439	0.0227745	0.207136
YHR095W			DMA	1.27481	1.30908	1.29195	0.0242364	0.369546
YHR096C	HXT5		DMA	1.07273	1.03607	1.0544	0.0259235	0.076418
YHR097C			DMA	1.20658	1.11024	1.15841	0.0681229	0.212142
YHR101C	BIG1	big1-5001	TSA	0.78128	0.507666	0.644473	0.193474	-0.633808
YHR103W	SBE22		DMA	0.944392	1.02955	0.98697	0.0602135	-0.0189223
YHR104W	GRE3		DMA	1.03951	1.12513	1.08232	0.0605435	0.114132
YHR105W	YPT35		DMA	1.12539	1.00968	1.06754	0.0818163	0.094284
YHR106W	TRR2		DMA	1.02978	1.12758	1.07868	0.069159	0.109269
YHR107C	CDC12	cdc12-td	TSA	0.69435	0.505303	0.599827	0.133676	-0.737382
YHR107C	CDC12	cdc12-1	TSA	1.33095	1.2408	1.28587	0.0637467	0.362747
YHR108W	GGA2		DMA	1.05872	1.03542	1.04707	0.0164795	0.0663597
YHR109W	CTM1		DMA	0.99336	1.1345	1.06393	0.0998027	0.0894043
YHR110W	ERP5		DMA	1.31656	1.06128	1.18892	0.180509	0.249654
YHR111W	UBA4		DMA	0.899276	0.913009	0.906143	0.00971095	-0.14219
YHR111W	UBA4		TSA	1.11738	1.05549	1.08643	0.0437669	0.1196
YHR112C			DMA	1.16527	1.17095	1.16811	0.00401936	0.224177
YHR113W	APE4		DMA	0.973072	0.889057	0.931064	0.0594077	-0.103047
YHR114W	BZZ1		DMA	1.14453	1.04277	1.09365	0.0719597	0.129151
YHR115C	DMA1		DMA	1.14076	1.12842	1.13459	0.00872565	0.182169
YHR116W	COX23		DMA	0.84024	0.893647	0.866944	0.0377647	-0.20599
YHR117W	TOM71		DMA	1.06858	1.02123	1.0449	0.0334806	0.0633698
[truncated: 2,990 more rows]

## Sheet: GFPunit(NES-tGFP)
ORF	Name	Allele	array name	GFPunit_Rep1	GFPunit_Rep2	GFPunit_Average	GFPunit_STDEV	GFPunuit (log2)	GFP-op_nega	GFP-op_posi
YAL001C	TFC3	tfc3-g349e	TSv6	3.28	1.93677	2.60839	0.949805	1.38316
YAL002W	VPS8		DMA	0.8	0.9	0.85	0.0707107	-0.234465	1
YAL003W	EFB1	efb1-4	TSv6	0.632125	1.0807	0.856415	0.317193	-0.223619
YAL004W	YAL004W		DMA	0.9	0.8	0.85	0.0707107	-0.234465
YAL005C	SSA1		DMA	1	0.9	0.95	0.0707107	-0.0740006
YAL007C	ERP2		DMA	1.2	1.1	1.15	0.0707107	0.201634
YAL008W	FUN14		DMA	1.4	1.8	1.6	0.282843	0.678072
YAL010C	MDM10		DMA	0.7	0.8	0.75	0.0707107	-0.415037
YAL011W	SWC3		DMA	0.7	0.8	0.75	0.0707107	-0.415037		1
YAL013W	DEP1		DMA	0.7	0.7	0.7	0	-0.514573
YAL014C	SYN8		DMA	1.1	1	1.05	0.0707107	0.0703893
YAL015C	NTG1		DMA	1	1.1	1.05	0.0707107	0.0703893
YAL017W	PSK1		DMA	1.2	1.1	1.15	0.0707107	0.201634
YAL018C	LDS1		DMA	1.7	1.3	1.5	0.282843	0.584963
YAL019W	FUN30		DMA	0.9	1	0.95	0.0707107	-0.0740006
YAL020C	ATS1		DMA	0.9	1	0.95	0.0707107	-0.0740006
YAL022C	FUN26		DMA	1	1	1	0	0
YAL023C	PMT2		DMA	1.2	1.1	1.15	0.0707107	0.201634
YAL024C	LTE1		DMA	0.6	0.8	0.7	0.141421	-0.514573
YAL025C	MAK16	mak16-ph	TSv6	0.888302	0.950758	0.91953	0.0441633	-0.121031	1
YAL026C	DRS2		DMA	0.5	0.6	0.55	0.0707107	-0.862496
YAL027W	SAW1		DMA	1	0.9	0.95	0.0707107	-0.0740006
YAL028W	FRT2		DMA	0.9	0.9	0.9	0	-0.152003
YAL029C	MYO4		DMA	0.9	1.2	1.05	0.212132	0.0703893
YAL030W	SNC1		DMA	0.9	0.9	0.9	0	-0.152003
YAL031C	GIP4		DMA	1.3	1.2	1.25	0.0707107	0.321928
YAL034C	FUN19		DMA	0.9	1.3	1.1	0.282843	0.137504
YAL034W-A	MTW1	mtw1-ts	TSv6	1.41614	1.27032	1.34323	0.103113	0.425704
YAL036C	RBG1		DMA	1	1.3	1.15	0.212132	0.201634
YAL037W	YAL037W		DMA	1.1	1.1	1.1	0	0.137504
YAL038W	CDC19	cdc19-1	TSv6	1.26107	1.25837	1.25972	0.00190605	0.3331
YAL040C	CLN3		DMA	1.2	1	1.1	0.141421	0.137504
YAL041W	CDC24	cdc24-5	TSv6	0.908099	1.00191	0.955006	0.0663368	-0.0664185
YAL041W	CDC24	cdc24-1	TSv6	1.01793	1.13513	1.07653	0.0828693	0.106389
YAL041W	CDC24	cdc24-11	TSv6	1.16029	1.15808	1.15919	0.00155755	0.213112
YAL041W	CDC24	cdc24-h	TSv6	1.39381	1.15845	1.27613	0.166426	0.351777
YAL041W	CDC24	cdc24-3	TSv6	1.34543	1.32813	1.33678	0.0122305	0.418762
YAL041W	CDC24	cdc24-4	TSv6	1.46645	1.32801	1.39723	0.0978903	0.482567
YAL041W	CDC24	cdc24-2	TSv6	1.70407	1.91838	1.81123	0.151544	0.856968
YAL042C-A	YAL042C-A		DMA	1	1.1	1.05	0.0707107	0.0703893
YAL042W	ERV46		DMA	1.2	0.2	0.7	0.707107	-0.514573
YAL045C	YAL045C		DMA	1.1	1.1	1.1	0	0.137504
YAL046C	AIM1		DMA	1.5	1.2	1.35	0.212132	0.432959
YAL048C	GEM1		DMA	1.1	1	1.05	0.0707107	0.0703893
YAL049C	AIM2		DMA	1	1.2	1.1	0.141421	0.137504
YAL051W	OAF1		DMA	1.2	1.1	1.15	0.0707107	0.201634
YAL053W	FLC2		DMA	1.1	1	1.05	0.0707107	0.0703893
YAL054C	ACS1		DMA	1.4	1.5	1.45	0.0707107	0.536053
YAL055W	PEX22		DMA	0.9	1.1	1	0.141421	0
YAL056C-A	YAL056C-A		DMA	1	1.1	1.05	0.0707107	0.0703893
YAL056W	GPB2		DMA	1.2	1.3	1.25	0.0707107	0.321928
YAL058W	CNE1		DMA	1.3	1.2	1.25	0.0707107	0.321928
YAL059W	ECM1		DMA	1.2	1.4	1.3	0.141421	0.378512
YAL060W	BDH1		DMA	1.1	1.1	1.1	0	0.137504
YAL061W	BDH2		DMA	1.1	1.2	1.15	0.0707107	0.201634	1
YAL062W	GDH3		DMA	1.2	1.3	1.25	0.0707107	0.321928		1
YAL064C-A	TDA8		DMA	1.3	1.7	1.5	0.282843	0.584963
YAL065C	YAL065C		DMA	1.5	1.5	1.5	0	0.584963
YAL066W	YAL066W		DMA	1	1	1	0	0
YAL067C	SEO1		DMA	1	1.2	1.1	0.141421	0.137504
YAL068C	PAU8		DMA	1.2	1.1	1.15	0.0707107	0.201634
YAR002C-A	ERP1		DMA	1.3	1.5	1.4	0.141421	0.485427
YAR002W	NUP60		DMA	1.1	1.3	1.2	0.141421	0.263034
YAR003W	SWD1		DMA	1	1	1	0	0
YAR007C	RFA1	rfa1-m2	TSv6	1.14195	1.20176	1.17185	0.042292	0.22879
YAR014C	BUD14		DMA	0.9	0.7	0.8	0.141421	-0.321928
YAR015W	ADE1		DMA	1	0.9	0.95	0.0707107	-0.0740006	1
YAR018C	KIN3		DMA	1	0.9	0.95	0.0707107	-0.0740006
YAR019C	CDC15	cdc15-2	TSv6	0.943169	0.769007	0.856088	0.123152	-0.224169
YAR019C	CDC15	cdc15-1	TSv6	1.22227	1.05471	1.13849	0.118481	0.187126
YAR020C	PAU7		DMA	1.2	1.4	1.3	0.141421	0.378512
YAR023C	YAR023C		DMA	1.3	1.6	1.45	0.212132	0.536053
YAR027W	UIP3		DMA	1	1.1	1.05	0.0707107	0.0703893
YAR028W	YAR028W		DMA	1.1	1.2	1.15	0.0707107	0.201634
YAR029W	YAR029W		DMA	1.2	1.3	1.25	0.0707107	0.321928
YAR030C	YAR030C		DMA	1.2	1.7	1.45	0.353553	0.536053
YAR031W	PRM9		DMA	1.4	1.4	1.4	0	0.485427
YAR035W	YAT1		DMA	1	1.1	1.05	0.0707107	0.0703893
YAR037W	YAR037W		DMA	1.2	1.8	1.5	0.424264	0.584963
YAR040C	YAR040C		DMA	1.2	1.1	1.15	0.0707107	0.201634
YAR042W	SWH1		DMA	0.9	1.2	1.05	0.212132	0.0703893
YAR043C	YAR043C		DMA	1.2	1.2	1.2	0	0.263034
YAR044W	YAR044W		DMA	1.2	1	1.1	0.141421	0.137504
YAR047C	YAR047C		DMA	2	1.1	1.55	0.636396	0.632268
YAR050W	FLO1		DMA	1.3	1.2	1.25	0.0707107	0.321928
YBL001C	ECM15		DMA	1.4	1.3	1.35	0.0707107	0.432959
YBL003C	HTA2		DMA	1.1	1	1.05	0.0707107	0.0703893
YBL005W	PDR3		DMA	1.1	1	1.05	0.0707107	0.0703893
YBL007C	SLA1		DMA	0.7	0.7	0.7	0	-0.514573
YBL008W	HIR1		DMA	1	0.9	0.95	0.0707107	-0.0740006
YBL009W	ALK2		DMA	1.1	1.2	1.15	0.0707107	0.201634
YBL010C	YBL010C		DMA	1.3	1	1.15	0.212132	0.201634
YBL011W	SCT1		DMA	0.7	0.6	0.65	0.0707107	-0.621488
YBL013W	FMT1		DMA	1	1.1	1.05	0.0707107	0.0703893
YBL015W	ACH1		DMA	1.3	1	1.15	0.212132	0.201634
YBL016W	FUS3		DMA	0.7	0.8	0.75	0.0707107	-0.415037
YBL017C	PEP1		DMA	1.1	1.1	1.1	0	0.137504
YBL019W	APN2		DMA	1.1	1.1	1.1	0	0.137504
YBL021C	HAP3		DMA	0.9	0.9	0.9	0	-0.152003
YBL023C	MCM2	mcm2-1	TSv6	1.15702	1.12366	1.14034	0.0235913	0.189467
YBL024W	NCL1		DMA	1	1	1	0	0
YBL025W	RRN10		DMA	0.4	0.3	0.35	0.0707107	-1.51457
YBL026W	LSM2	lsm2-ph	TSv6	1.19445	1.19911	1.19678	0.00329328	0.259159
YBL027W	RPL19B		DMA	0.6	0.5	0.55	0.0707107	-0.862496
YBL028C	YBL028C		DMA	1.1	1.1	1.1	0	0.137504
YBL029W	YBL029W		DMA	0.9	1.3	1.1	0.282843	0.137504
YBL031W	SHE1		DMA	0.2	0.5	0.35	0.212132	-1.51457
YBL032W	HEK2		DMA	1	1	1	0	0
YBL034C	STU1	stu1-7	TSv6	0.173951	0.239218	0.206584	0.0461503	-2.2752
YBL034C	STU1	stu1-12	TSv6	1.37909	1.4069	1.39299	0.0196614	0.47819
YBL034C	STU1	stu1-8	TSv6	1.59325	1.37427	1.48376	0.154849	0.569258
YBL034C	STU1	stu1-6	TSv6	1.53182	1.54255	1.53718	0.00758636	0.620288
YBL034C	STU1	stu1-5	TSv6	1.99306	1.39085	1.69195	0.425826	0.758689		1
YBL035C	POL12	pol12-ts	TSv6	0.998924	1.10228	1.0506	0.0730816	0.0712135
YBL036C	YBL036C		DMA	0.9	1.3	1.1	0.282843	0.137504
YBL037W	APL3		DMA	0.9	1	0.95	0.0707107	-0.0740006
YBL039C	URA7		DMA	1.1	1	1.05	0.0707107	0.0703893
YBL040C	ERD2	erd2-ph	TSv6	1.1203	1.07319	1.09674	0.0333099	0.133227
YBL041W	PRE7	pre7-ph	TSv6	1.38379	1.35763	1.37071	0.0184939	0.454923
YBL042C	FUI1		DMA	1.3	1	1.15	0.212132	0.201634
YBL043W	ECM13		DMA	1.1	1	1.05	0.0707107	0.0703893
YBL046W	PSY4		DMA	1.7	1.3	1.5	0.282843	0.584963
YBL047C	EDE1		DMA	0.9	0.9	0.9	0	-0.152003
YBL048W	RRT1		DMA	1	1.1	1.05	0.0707107	0.0703893
YBL049W	MOH1		DMA	1.4	1.1	1.25	0.212132	0.321928
YBL050W	SEC17	sec17-1	TSv6	1.42004	1.16702	1.29353	0.178909	0.371316
YBL051C	PIN4		DMA	0.8	0.8	0.8	0	-0.321928
YBL052C	SAS3		DMA	1.1	1	1.05	0.0707107	0.0703893
YBL053W	YBL053W		DMA	1.2	1.1	1.15	0.0707107	0.201634
YBL054W	TOD6		DMA	1	1.4	1.2	0.282843	0.263034
YBL055C	YBL055C		DMA	1.2	1.2	1.2	0	0.263034
YBL056W	PTC3		DMA	1.3	1.1	1.2	0.141421	0.263034
YBL057C	PTH2		DMA	1	2.5	1.75	1.06066	0.807355
YBL059W	YBL059W		DMA	0.9	0.8	0.85	0.0707107	-0.234465
YBL060W	YEL1		DMA	0.9	1	0.95	0.0707107	-0.0740006
YBL061C	SKT5		DMA	1.3	1.1	1.2	0.141421	0.263034
YBL062W	YBL062W		DMA	1	1	1	0	0
YBL063W	KIP1		DMA	1	1.6	1.3	0.424264	0.378512
YBL064C	PRX1		DMA	1.3	1.2	1.25	0.0707107	0.321928
YBL065W	YBL065W		DMA	0.7	1.2	0.95	0.353553	-0.0740006
YBL066C	SEF1		DMA	0.9	1	0.95	0.0707107	-0.0740006	1
YBL067C	UBP13		DMA	1.2	1.2	1.2	0	0.263034
YBL068W	PRS4		DMA	1.3	1.3	1.3	0	0.378512
YBL069W	AST1		DMA	1.2	1.3	1.25	0.0707107	0.321928
YBL070C	YBL070C		DMA	1.1	1.4	1.25	0.212132	0.321928
YBL071C	YBL071C		DMA	1	1.3	1.15	0.212132	0.201634
YBL072C	RPS8A		DMA	0.5	0.4	0.45	0.0707107	-1.152
YBL074C	AAR2	aar2-ph	TSv6	1.09011	0.949971	1.02004	0.0990904	0.0286232	1
YBL075C	SSA3		DMA	1.1	1	1.05	0.0707107	0.0703893
YBL076C	ILS1	ils1-1	TSv6	1.28441	0.991036	1.13773	0.20745	0.186152
YBL078C	ATG8		DMA	1.1	1	1.05	0.0707107	0.0703893
YBL079W	NUP170		DMA	0.3	0.4	0.35	0.0707107	-1.51457	1
YBL081W	YBL081W		DMA	0.9	0.8	0.85	0.0707107	-0.234465
YBL082C	ALG3		DMA	1.1	1.2	1.15	0.0707107	0.201634
YBL083C	YBL083C		DMA	1.3	1.2	1.25	0.0707107	0.321928
YBL084C	CDC27	cdc27-2	TSv6	1.26018	1.23744	1.24881	0.0160811	0.320553
YBL084C	CDC27	cdc27-1	TSv6	1.45419	1.38327	1.41873	0.0501446	0.504602
YBL085W	BOI1		DMA	1.7	1.8	1.75	0.0707107	0.807355
YBL086C	YBL086C		DMA	1.3	1.2	1.25	0.0707107	0.321928
YBL087C	RPL23A		DMA	0.9	0.8	0.85	0.0707107	-0.234465	1
YBL088C	TEL1		DMA	1.4	1.5	1.45	0.0707107	0.536053
YBL089W	AVT5		DMA	0.9	0.9	0.9	0	-0.152003
YBL091C	MAP2		DMA	1	1.3	1.15	0.212132	0.201634
YBL091C-A	SCS22		DMA	1.2	0.9	1.05	0.212132	0.0703893
YBL093C	ROX3	rox3-182	TSv6	0.726582	0.656208	0.691395	0.049762	-0.532419	1
YBL094C	YBL094C		DMA	0.6	0.4	0.5	0.141421	-1
YBL095W	MRX3		DMA	1.4	1.1	1.25	0.212132	0.321928
YBL096C	YBL096C		DMA	1.2	1.2	1.2	0	0.263034
YBL097W	BRN1	brn1-9	TSv6	1.09616	0.947753	1.02196	0.104939	0.0313324
YBL097W	BRN1	brn1-16	TSv6	1.54362	1.87681	1.71022	0.235602	0.774181
YBL098W	BNA4		DMA	1.3	1.4	1.35	0.0707107	0.432959
YBL100C	YBL100C		DMA	1.1	1.3	1.2	0.141421	0.263034
YBL101C	ECM21		DMA	1.1	1.3	1.2	0.141421	0.263034
YBL102W	SFT2		DMA	1.2	1.2	1.2	0	0.263034
YBL103C	RTG3		DMA	0.4	0.4	0.4	0	-1.32193
YBL103C	RTG3		DMA	1.2	1.2	1.2	0	0.263034
YBL104C	SEA4		DMA	1.1	0.9	1	0.141421	0
YBL105C	PKC1	pkc1-2	TSv6	0.844833	0.899644	0.872238	0.0387575	-0.197206
YBL105C	PKC1	pkc1-4	TSv6	1.16164	1.04144	1.10154	0.0849931	0.139522
YBL105C	PKC1	pkc1-1	TSv6	1.52405	1.38914	1.45659	0.0953939	0.542597
YBL105C	PKC1	pkc1-3	TSv6	1.50876	1.63529	1.57203	0.0894699	0.652627
YBL105C	PKC1	pkc1-ts	TSv6	1.4798	1.67957	1.57968	0.141258	0.659636
YBL106C	SRO77		DMA	1	1.1	1.05	0.0707107	0.0703893
YBL107C	MIX23		DMA	0.9	1.1	1	0.141421	0
YBR001C	NTH2		DMA	1.4	1.3	1.35	0.0707107	0.432959
YBR004C	GPI18	ybr004c-ph	TSv6	1.85524	1.73943	1.79733	0.0818915	0.845859
YBR005W	RCR1		DMA	1.1	1.3	1.2	0.141421	0.263034
YBR006W	UGA2		DMA	1.1	1.2	1.15	0.0707107	0.201634
YBR007C	DSF2		DMA	1.5	1.4	1.45	0.0707107	0.536053
YBR008C	FLR1		DMA	1.2	1.4	1.3	0.141421	0.378512
YBR009C	HHF1		DMA	0.9	0.9	0.9	0	-0.152003	1
YBR010W	HHT1		DMA	1	1	1	0	0
YBR011C	IPP1	ipp1-ph	TSv6	0.831183	0.694052	0.762617	0.0969663	-0.390969
YBR012C	YBR012C		DMA	1	1	1	0	0
YBR013C	YBR013C		DMA	1.2	1.1	1.15	0.0707107	0.201634
YBR014C	GRX7		DMA	1	1	1	0	0
YBR015C	MNN2		DMA	1	0.9	0.95	0.0707107	-0.0740006	1
YBR016W	YBR016W		DMA	1.1	1.3	1.2	0.141421	0.263034
YBR018C	GAL7		DMA	1	1.1	1.05	0.0707107	0.0703893
YBR019C	GAL10		DMA	1	0.9	0.95	0.0707107	-0.0740006
YBR020W	GAL1		DMA	1.1	1.1	1.1	0	0.137504
YBR020W	GAL1		DMA	1.5	1.2	1.35	0.212132	0.432959
YBR022W	POA1		DMA	1.1	1.2	1.15	0.0707107	0.201634
YBR023C	CHS3		DMA	1	0.9	0.95	0.0707107	-0.0740006
YBR024W	SCO2		DMA	1.2	1.4	1.3	0.141421	0.378512
YBR025C	OLA1		DMA	0.9	0.9	0.9	0	-0.152003
YBR026C	ETR1		DMA	0.8	0.6	0.7	0.141421	-0.514573
YBR027C	YBR027C		DMA	1.5	1.4	1.45	0.0707107	0.536053
YBR028C	YPK3		DMA	1	1.2	1.1	0.141421	0.137504
YBR029C	CDS1	cds1-ph	TSv6	1.51661	1.45935	1.48798	0.0404929	0.573355
YBR030W	RKM3		DMA	1	0.9	0.95	0.0707107	-0.0740006
YBR031W	RPL4A		DMA	0.9	0.9	0.9	0	-0.152003
YBR032W	YBR032W		DMA	1.1	0.9	1	0.141421	0
YBR033W	EDS1		DMA	1	1	1	0	0
YBR034C	HMT1		DMA	1	1	1	0	0
YBR036C	CSG2		DMA	0.4	0.5	0.45	0.0707107	-1.152
YBR040W	FIG1		DMA	1.5	1.8	1.65	0.212132	0.722466
YBR041W	FAT1		DMA	1.1	1.1	1.1	0	0.137504
YBR042C	CST26		DMA	1	1.1	1.05	0.0707107	0.0703893
YBR043C	QDR3		DMA	1.1	0.9	1	0.141421	0
YBR044C	TCM62		DMA	0.8	1	0.9	0.141421	-0.152003
YBR045C	GIP1		DMA	1.1	1	1.05	0.0707107	0.0703893
YBR046C	ZTA1		DMA	1	1.1	1.05	0.0707107	0.0703893
YBR047W	FMP23		DMA	1	1	1	0	0
YBR048W	RPS11B		DMA	0.8	0.8	0.8	0	-0.321928
YBR049C	REB1	reb1-ph	TSv6	0.182842	0.162451	0.172647	0.014418	-2.53411
YBR050C	REG2		DMA	1.1	0.9	1	0.141421	0
YBR051W	YBR051W		DMA	1.3	1.4	1.35	0.0707107	0.432959
YBR052C	RFS1		DMA	1.1	1.2	1.15	0.0707107	0.201634
YBR053C	YBR053C		DMA	1.2	1.2	1.2	0	0.263034
YBR054W	YRO2		DMA	1.2	1.1	1.15	0.0707107	0.201634
YBR055C	PRP6	prp6-ts	TSv6	1.71287	1.56359	1.63823	0.105557	0.712135
YBR055C	PRP6	prp6-1	TSv6	3.81334	2.48942	3.15138	0.936157	1.65598
YBR056W	YBR056W		DMA	1.1	1	1.05	0.0707107	0.0703893
YBR057C	MUM2		DMA	0.8	0.9	0.85	0.0707107	-0.234465
YBR058C	UBP14		DMA	1	1.2	1.1	0.141421	0.137504
YBR058C-A	TSC3	tsc3-2	TSv6	1.01505	0.885792	0.950422	0.0914007	-0.0733603
YBR059C	AKL1		DMA	0.9	0.7	0.8	0.141421	-0.321928
YBR060C	ORC2	orc2-4	TSv6	1.193	1.05478	1.12389	0.0977344	0.168497
YBR060C	ORC2	orc2-2	TSv6	1.17394	1.08282	1.12838	0.0644271	0.174251
YBR060C	ORC2	orc2-3	TSv6	1.32319	1.31269	1.31794	0.00742568	0.398283
YBR060C	ORC2	orc2-1	TSv6	1.28829	1.47746	1.38288	0.133766	0.467671
YBR061C	TRM7		DMA	0.6	0.6	0.6	0	-0.736966
YBR061C	TRM7		DMA	1.2	1.1	1.15	0.0707107	0.201634
YBR062C	YBR062C		DMA	1.2	1.3	1.25	0.0707107	0.321928
YBR063C	YBR063C		DMA	1.3	1.9	1.6	0.424264	0.678072
YBR064W	YBR064W		DMA	1.4	1.3	1.35	0.0707107	0.432959
YBR065C	ECM2		DMA	1.1	1.2	1.15	0.0707107	0.201634
YBR066C	NRG2		DMA	1.2	1.6	1.4	0.282843	0.485427
YBR067C	TIP1		DMA	1.3	1.4	1.35	0.0707107	0.432959
YBR068C	BAP2		DMA	1.2	1.2	1.2	0	0.263034
YBR069C	TAT1		DMA	1.2	1.5	1.35	0.212132	0.432959
YBR070C	ALG14	alg14-ph	TSv6	1.12084	1.10193	1.11138	0.0133701	0.152355
YBR071W	YBR071W		DMA	1.1	1	1.05	0.0707107	0.0703893
YBR072W	HSP26		DMA	1.3	1.2	1.25	0.0707107	0.321928
YBR073W	RDH54		DMA	1.1	1	1.05	0.0707107	0.0703893
YBR074W	PFF1		DMA	1.3	1.5	1.4	0.141421	0.485427
YBR075W	YBR075W		DMA	1.2	1	1.1	0.141421	0.137504
YBR075W	YBR075W		DMA	1.5	1.8	1.65	0.212132	0.722466
YBR076W	ECM8		DMA	1.1	1.1	1.1	0	0.137504
YBR077C	SLM4		DMA	1.6	1.5	1.55	0.0707107	0.632268
YBR078W	ECM33		DMA	1.7	1.1	1.4	0.424264	0.485427
YBR079C	RPG1	rpg1-ph	TSv6	1.30929	1.35634	1.33281	0.0332743	0.414476
YBR079C	RPG1	rpg1-1	TSv6	1.3918	1.32985	1.36083	0.043803	0.444483
YBR080C	SEC18	sec18-1	TSv6	0.745935	0.704928	0.725432	0.0289958	-0.463089	1
YBR082C	UBC4		DMA	0.9	1.1	1	0.141421	0	1
YBR082C	UBC4		DMA	1.1	1.1	1.1	0	0.137504	1
YBR083W	TEC1		DMA	1.1	1	1.05	0.0707107	0.0703893
YBR084C-A	RPL19A		DMA	0.7	0.8	0.75	0.0707107	-0.415037	1
YBR084W	MIS1		DMA	1.2	1.1	1.15	0.0707107	0.201634
YBR085W	AAC3		DMA	1	1.2	1.1	0.141421	0.137504
YBR086C	IST2		DMA	1	1.1	1.05	0.0707107	0.0703893
YBR087W	RFC5	rfc5-1	TSv6	1.54843	1.59574	1.57209	0.0334533	0.652681
YBR089C-A	NHP6B		DMA	1.3	1.4	1.35	0.0707107	0.432959
YBR090C	YBR090C		DMA	1.3	1.3	1.3	0	0.378512
YBR092C	PHO3		DMA	1.1	1.1	1.1	0	0.137504
YBR093C	PHO5		DMA	0.6	0.5	0.55	0.0707107	-0.862496
YBR094W	PBY1		DMA	1.2	1	1.1	0.141421	0.137504
YBR095C	RXT2		DMA	0.8	0.7	0.75	0.0707107	-0.415037
YBR095C	RXT2		DMA	1	0.9	0.95	0.0707107	-0.0740006
YBR098W	MMS4		DMA	1	1.2	1.1	0.141421	0.137504
YBR099C	YBR099C		DMA	1.3	0.9	1.1	0.282843	0.137504
YBR100W	YBR100W		DMA	1.1	1	1.05	0.0707107	0.0703893
YBR101C	FES1		DMA	1	1.3	1.15	0.212132	0.201634
YBR102C	EXO84	exo84-102	TSv6	0.892596	0.979004	0.9358	0.0610999	-0.0957283	1
YBR103W	SIF2		DMA	0.7	0.7	0.7	0	-0.514573
YBR104W	YMC2		DMA	0.9	0.9	0.9	0	-0.152003
YBR105C	VID24		DMA	1.5	1.4	1.45	0.0707107	0.536053
YBR106W	PHO88		DMA	0.2	0.2	0.2	0	-2.32193
YBR107C	IML3		DMA	1	1.1	1.05	0.0707107	0.0703893
YBR108W	AIM3		DMA	1.4	1.3	1.35	0.0707107	0.432959
YBR109C	CMD1	cmd1-1	TSv6	0.637263	0.718623	0.677943	0.0575303	-0.560764	1
YBR109C	CMD1	cmd1-3	TSv6	0.795596	0.777616	0.786606	0.0127135	-0.346286
YBR109C	CMD1	cmd1-8	TSv6	1.38048	1.43304	1.40676	0.037163	0.492375
YBR110W	ALG1	alg1-1	TSv6	1.24539	1.61753	1.43146	0.263145	0.517487
YBR111C	YSA1		DMA	1	1.1	1.05	0.0707107	0.0703893
YBR113W	YBR113W		DMA	1.1	1.1	1.1	0	0.137504
YBR114W	RAD16		DMA	1	1.2	1.1	0.141421	0.137504
YBR115C	LYS2		DMA	0.2	0.2	0.2	0	-2.32193		1
YBR115C	LYS2		DMA	0.3	0.5	0.4	0.141421	-1.32193		1
YBR116C	YBR116C		DMA	1.1	1.1	1.1	0	0.137504
YBR118W	TEF2		DMA	1	1.1	1.05	0.0707107	0.0703893		1
YBR119W	MUD1		DMA	1	1	1	0	0
YBR121C	GRS1		DMA	1	1	1	0	0
YBR121C	GRS1	grs1-ph	TSv6	1.35136	1.11643	1.23389	0.166122	0.303217
YBR122C	MRPL36		DMA	1	1.1	1.05	0.0707107	0.0703893
YBR123C	TFC1	tfc1-e447k	TSv6	2.66372	1.72316	2.19344	0.665074	1.1332
YBR125C	PTC4		DMA	1.1	1.2	1.15	0.0707107	0.201634
YBR126C	TPS1		DMA	0.6	0.6	0.6	0	-0.736966	1
YBR126C	TPS1	tps1-supp1	TSv6	1.08252	1.07229	1.0774	0.00723383	0.107561
YBR128C	ATG14		DMA	1.1	0.9	1	0.141421	0
YBR129C	OPY1		DMA	1	1	1	0	0
YBR130C	SHE3		DMA	1.1	1	1.05	0.0707107	0.0703893
YBR131W	CCZ1		DMA	0.9	1	0.95	0.0707107	-0.0740006
YBR132C	AGP2		DMA	1.2	0.9	1.05	0.212132	0.0703893
YBR134W	YBR134W		DMA	0.9	0.9	0.9	0	-0.152003
YBR135W	CKS1	cks1-38	TSv6	1.02295	1.31761	1.17028	0.208356	0.226855
YBR135W	CKS1	cks1-35	TSv6	1.63142	1.65148	1.64145	0.0141837	0.714973
YBR137W	YBR137W		DMA	1.2	1.1	1.15	0.0707107	0.201634
YBR138C	YBR138C		DMA	1.2	1.1	1.15	0.0707107	0.201634
YBR139W	YBR139W		DMA	1	1	1	0	0
YBR141C	BMT2		DMA	0.9	0.8	0.85	0.0707107	-0.234465
YBR142W	MAK5	mak5-ph	TSv6	0.708873	0.446659	0.577766	0.185413	-0.791444
YBR143C	SUP45	sup45-ts	TSv6	0.691766	0.801431	0.746598	0.0775447	-0.421596
YBR144C	YBR144C		DMA	1.1	1.1	1.1	0	0.137504
YBR145W	ADH5		DMA	1.4	1.2	1.3	0.141421	0.378512		1
YBR146W	MRPS9		DMA	0.9	0.9	0.9	0	-0.152003
YBR147W	RTC2		DMA	0.9	0.9	0.9	0	-0.152003
YBR148W	YSW1		DMA	1.3	1.1	1.2	0.141421	0.263034
YBR149W	ARA1		DMA	1.1	1	1.05	0.0707107	0.0703893
YBR150C	TBS1		DMA	1.1	1.1	1.1	0	0.137504
YBR151W	APD1		DMA	1.1	1.1	1.1	0	0.137504
YBR152W	SPP381	spp381-ph	TSv6	1.52589	1.50475	1.51532	0.014951	0.59962
YBR153W	RIB7	rib7-ph	TSv6	2.13875	2.04874	2.09375	0.0636482	1.06609
YBR154C	RPB5	rpb5-ph	TSv6	0.521824	0.584126	0.552975	0.0440543	-0.854714
YBR154C	RPB5	rpb5-h147r	TSv6	1.26813	1.1369	1.20252	0.0927914	0.266055
YBR155W	CNS1	cns1-1	TSv6	0.129323	0.289569	0.209446	0.113311	-2.25535
YBR156C	SLI15		DMA	1.1	1.1	1.1	0	0.137504
YBR156C	SLI15	sli15-3	TSv6	1.67871	1.39503	1.53687	0.200595	0.619997
YBR157C	ICS2		DMA	1	1.1	1.05	0.0707107	0.0703893
YBR158W	AMN1		DMA	0.9	1.2	1.05	0.212132	0.0703893
YBR159W	IFA38		DMA	1.3	1	1.15	0.212132	0.201634
YBR160W	CDC28	cdc28-td	TSv6	0.254153	0.32174	0.287946	0.0477908	-1.79613
YBR160W	CDC28	cdc28-13	TSv6	0.960573	1.09663	1.0286	0.0962047	0.0406824
YBR160W	CDC28	cdc28-4	TSv6	1.04565	1.09277	1.06921	0.0333153	0.0965473
YBR160W	CDC28	cdc28-1	TSv6	1.10235	1.07771	1.09003	0.017423	0.124373
YBR161W	CSH1		DMA	1.2	1.1	1.15	0.0707107	0.201634
YBR162C	TOS1		DMA	1.5	1.2	1.35	0.212132	0.432959
YBR162W-A	YSY6		DMA	1	1	1	0	0
YBR164C	ARL1		DMA	1	0.9	0.95	0.0707107	-0.0740006
YBR165W	UBS1		DMA	1.1	0.9	1	0.141421	0
YBR165W	UBS1		DMA	1.3	1.3	1.3	0	0.378512
YBR166C	TYR1		DMA	0.9	1	0.95	0.0707107	-0.0740006
YBR167C	POP7	pop7-ph	TSv6	1.44614	1.30591	1.37603	0.0991576	0.460509
YBR168W	PEX32		DMA	1	1	1	0	0
YBR169C	SSE2		DMA	1.2	1.5	1.35	0.212132	0.432959
YBR170C	NPL4		DMA	0.5	0.7	0.6	0.141421	-0.736966
YBR171W	SEC66		DMA	0.9	0.8	0.85	0.0707107	-0.234465
YBR172C	SMY2		DMA	1	1.2	1.1	0.141421	0.137504
YBR174C	YBR174C		DMA	1	1	1	0	0
YBR175W	SWD3		DMA	1.1	1.2	1.15	0.0707107	0.201634
YBR176W	ECM31		DMA	1.1	1.1	1.1	0	0.137504
YBR177C	EHT1		DMA	1.4	1	1.2	0.282843	0.263034
YBR178W	YBR178W		DMA	1.2	1.4	1.3	0.141421	0.378512
YBR180W	DTR1		DMA	1.5	1.4	1.45	0.0707107	0.536053
YBR181C	RPS6B		DMA	0.6	0.6	0.6	0	-0.736966
YBR182C	SMP1		DMA	1.2	1.2	1.2	0	0.263034
YBR183W	YPC1		DMA	1.1	1.2	1.15	0.0707107	0.201634
YBR184W	YBR184W		DMA	0.9	1	0.95	0.0707107	-0.0740006
YBR185C	MBA1		DMA	1	1	1	0	0
YBR186W	PCH2		DMA	1.3	1.1	1.2	0.141421	0.263034
YBR187W	GDT1		DMA	0.9	1.2	1.05	0.212132	0.0703893
YBR188C	NTC20		DMA	1.2	1.4	1.3	0.141421	0.378512
YBR189W	RPS9B		DMA	0.2	0.3	0.25	0.0707107	-2
YBR193C	MED8	med8-51	TSv6	1.01285	1.16597	1.08941	0.108273	0.123545
YBR193C	MED8	med8-39	TSv6	1.47976	1.50198	1.49087	0.015714	0.576153		1
YBR194W	AIM4		DMA	0.7	0.6	0.65	0.0707107	-0.621488
YBR195C	MSI1		DMA	1.4	1.5	1.45	0.0707107	0.536053
YBR196C	PGI1	pgi1-2	TSv6	1.5303	2.34264	1.93647	0.57441	0.953432
YBR197C	YBR197C		DMA	1.3	1.5	1.4	0.141421	0.485427
YBR198C	TAF5	taf5-15	TSv6	1.0152	0.888008	0.951605	0.089939	-0.0715658
YBR198C	TAF5	taf5-20	TSv6	1.2911	1.0322	1.16165	0.183071	0.216175	1
YBR198C	TAF5	taf5-3	TSv6	1.26161	1.25382	1.25771	0.00550338	0.330805
YBR199W	KTR4		DMA	1.2	1.6	1.4	0.282843	0.485427
YBR200W	BEM1		DMA	0.5	0.5	0.5	0	-1
YBR201W	DER1		DMA	1.2	1.4	1.3	0.141421	0.378512
YBR202W	MCM7	cdc47-ts	TSv6	0.490634	0.547661	0.519148	0.0403245	-0.945783
YBR203W	COS111		DMA	1.2	1.5	1.35	0.212132	0.432959
YBR204C	LDH1		DMA	1	1.2	1.1	0.141421	0.137504
YBR205W	KTR3		DMA	1.3	1.1	1.2	0.141421	0.263034
YBR206W	YBR206W		DMA	1.1	1	1.05	0.0707107	0.0703893
YBR207W	FTH1		DMA	1.1	1.1	1.1	0	0.137504
YBR208C	DUR1,2		DMA	1.2	1	1.1	0.141421	0.137504
YBR209W	YBR209W		DMA	1	0.9	0.95	0.0707107	-0.0740006
YBR210W	ERV15		DMA	1.3	1.1	1.2	0.141421	0.263034
YBR211C	AME1	ame1-4	TSv6	1.24422	1.42775	1.33599	0.129778	0.417905
YBR212W	NGR1		DMA	1.4	1.3	1.35	0.0707107	0.432959
YBR213W	MET8		DMA	1.2	1.3	1.25	0.0707107	0.321928
YBR214W	SDS24		DMA	1.2	1.2	1.2	0	0.263034
YBR215W	HPC2		DMA	1.3	1.6	1.45	0.212132	0.536053
YBR216C	YBP1		DMA	1.2	1.5	1.35	0.212132	0.432959
YBR217W	ATG12		DMA	1	1.1	1.05	0.0707107	0.0703893
YBR218C	PYC2		DMA	1.2	1.2	1.2	0	0.263034
YBR219C	YBR219C		DMA	1	1.1	1.05	0.0707107	0.0703893
YBR220C	YBR220C		DMA	1.1	1	1.05	0.0707107	0.0703893
YBR221C	PDB1		DMA	1	1	1	0	0
YBR222C	PCS60		DMA	1.1	1.1	1.1	0	0.137504
YBR223C	TDP1		DMA	0.9	1.1	1	0.141421	0
YBR224W	YBR224W		DMA	0.9	0.8	0.85	0.0707107	-0.234465
YBR225W	YBR225W		DMA	1.1	1.1	1.1	0	0.137504
YBR226C	YBR226C		DMA	1.4	1.1	1.25	0.212132	0.321928
YBR227C	MCX1		DMA	1	0.9	0.95	0.0707107	-0.0740006
YBR228W	SLX1		DMA	1.3	1.2	1.25	0.0707107	0.321928
YBR229C	ROT2		DMA	1	0.9	0.95	0.0707107	-0.0740006
YBR230C	OM14		DMA	1.3	1.3	1.3	0	0.378512
YBR231C	SWC5		DMA	0.5	0.4	0.45	0.0707107	-1.152
YBR232C	YBR232C		DMA	1.2	1	1.1	0.141421	0.137504
YBR233W	PBP2		DMA	1.2	1.1	1.15	0.0707107	0.201634
YBR234C	ARC40	arc40-ph	TSv6	1.01439	1.06024	1.03732	0.0324209	0.0528551
YBR235W	VHC1		DMA	1.1	1	1.05	0.0707107	0.0703893
YBR236C	ABD1	abd1-5	TSv6	0.901371	1.02001	0.960691	0.0838913	-0.0578561
YBR236C	ABD1	abd1-8	TSv6	1.43936	1.45304	1.4462	0.00967064	0.532267
YBR237W	PRP5	prp5-1	TSv6	1.31423	1.1942	1.25421	0.084878	0.326783
YBR238C	YBR238C		DMA	0.9	0.9	0.9	0	-0.152003
YBR239C	ERT1		DMA	1.1	1.2	1.15	0.0707107	0.201634
YBR240C	THI2		DMA	1.1	1.1	1.1	0	0.137504
YBR241C	YBR241C		DMA	1.1	1.1	1.1	0	0.137504
YBR242W	YBR242W		DMA	1.5	1.4	1.45	0.0707107	0.536053
YBR244W	GPX2		DMA	1.1	1	1.05	0.0707107	0.0703893
YBR245C	ISW1		DMA	0.8	0.8	0.8	0	-0.321928	1
YBR246W	RRT2		DMA	1	0.8	0.9	0.141421	-0.152003
YBR247C	ENP1	enp1-1	TSv6	1.21466	1.26959	1.24212	0.0388454	0.312809
YBR248C	HIS7		DMA	0.3	0.3	0.3	0	-1.73697
YBR249C	ARO4		DMA	1	1.1	1.05	0.0707107	0.0703893
YBR250W	SPO23		DMA	1.1	1.1	1.1	0	0.137504
YBR253W	SRB6	srb6-ph	TSv6	1.39584	1.46477	1.4303	0.0487382	0.51632
YBR254C	TRS20	trs20-ph	TSv6	0.839345	0.819195	0.82927	0.0142483	-0.270087
YBR255W	MTC4		DMA	0.9	1	0.95	0.0707107	-0.0740006
YBR257W	POP4	pop4-ph	TSv6	0.226636	0.230375	0.228506	0.00264381	-2.1297
YBR258C	SHG1		DMA	1	1.2	1.1	0.141421	0.137504
YBR259W	YBR259W		DMA	1.1	1	1.05	0.0707107	0.0703893
YBR260C	RGD1		DMA	1.1	1.3	1.2	0.141421	0.263034
YBR261C	TAE1		DMA	1.1	0.2	0.65	0.636396	-0.621488
YBR262C	MIC12		DMA	0.9	1	0.95	0.0707107	-0.0740006
YBR263W	SHM1		DMA	1.2	1.3	1.25	0.0707107	0.321928
YBR264C	YPT10		DMA	1.2	1.2	1.2	0	0.263034
YBR265W	TSC10	tsc10-1	TSv6	1.54522	1.458	1.50161	0.0616751	0.586511
YBR266C	SLM6		DMA	0.6	0.5	0.55	0.0707107	-0.862496
YBR267W	REI1		DMA	0.4	0.4	0.4	0	-1.32193
YBR269C	SDH8		DMA	1.2	1.8	1.5	0.424264	0.584963
YBR270C	BIT2		DMA	1.3	1.1	1.2	0.141421	0.263034
YBR271W	EFM2		DMA	1.1	0.8	0.95	0.212132	-0.0740006
YBR272C	HSM3		DMA	1.4	1.2	1.3	0.141421	0.378512
YBR273C	UBX7		DMA	1.5	1.2	1.35	0.212132	0.432959
YBR274W	CHK1		DMA	1.2	1.5	1.35	0.212132	0.432959
YBR275C	RIF1		DMA	1	1.1	1.05	0.0707107	0.0703893
YBR276C	PPS1		DMA	1.3	1.3	1.3	0	0.378512
YBR277C	YBR277C		DMA	1	1.1	1.05	0.0707107	0.0703893
YBR278W	DPB3		DMA	1.2	1.1	1.15	0.0707107	0.201634
YBR280C	SAF1		DMA	1.2	1	1.1	0.141421	0.137504
YBR281C	DUG2		DMA	1.3	1.1	1.2	0.141421	0.263034
YBR283C	SSH1		DMA	1	1.4	1.2	0.282843	0.263034
YBR284W	YBR284W		DMA	1.2	1.2	1.2	0	0.263034
YBR285W	YBR285W		DMA	1.5	1.6	1.55	0.0707107	0.632268
YBR286W	APE3		DMA	1.2	1	1.1	0.141421	0.137504
YBR287W	YBR287W		DMA	1	1.1	1.05	0.0707107	0.0703893
YBR288C	APM3		DMA	0.9	1.1	1	0.141421	0
YBR289W	SNF5		DMA	0.4	0.5	0.45	0.0707107	-1.152
YBR290W	BSD2		DMA	1.2	1.1	1.15	0.0707107	0.201634
YBR291C	CTP1		DMA	1.3	1.2	1.25	0.0707107	0.321928
YBR292C	YBR292C		DMA	1.2	1	1.1	0.141421	0.137504
YBR293W	VBA2		DMA	1	1.2	1.1	0.141421	0.137504
YBR294W	SUL1		DMA	0.6	0.2	0.4	0.282843	-1.32193
YBR295W	PCA1		DMA	1.5	1.3	1.4	0.141421	0.485427
YBR296C	PHO89		DMA	2.5	1.7	2.1	0.565685	1.07039
YBR297W	MAL33		DMA	1.8	1.6	1.7	0.141421	0.765535
YBR298C	MAL31		DMA	1.2	0.9	1.05	0.212132	0.0703893
YBR299W	MAL32		DMA	1.4	1.8	1.6	0.282843	0.678072
YBR300C	YBR300C		DMA	0.9	1.4	1.15	0.353553	0.201634
YBR301W	PAU24		DMA	1.1	1	1.05	0.0707107	0.0703893
YCL001W	RER1		DMA	1.3	1.2	1.25	0.0707107	0.321928
YCL001W-A	YCL001W-A		DMA	1.2	1.4	1.3	0.141421	0.378512
YCL002C	YCL002C		DMA	1.3	1.2	1.25	0.0707107	0.321928
YCL004W	PGS1	ycl004w-ph	TSv6	0.47193	0.616116	0.544023	0.101955	-0.87826	1
YCL006C	YCL006C		DMA	1.2	1.3	1.25	0.0707107	0.321928
YCL009C	ILV6		DMA	1.3	1.4	1.35	0.0707107	0.432959
YCL010C	SGF29		DMA	1	1	1	0	0
YCL011C	GBP2		DMA	1.3	1.3	1.3	0	0.378512
YCL012W	YCL012W		DMA	1.1	1.2	1.15	0.0707107	0.201634
YCL013W	YCL013W		DMA	1.2	1.1	1.15	0.0707107	0.201634
YCL014W	BUD3		DMA	1	1.1	1.05	0.0707107	0.0703893
YCL016C	DCC1		DMA	1	1	1	0	0
YCL022C	YCL022C		DMA	1	1	1	0	0
YCL023C	YCL023C		DMA	0.9	0.8	0.85	0.0707107	-0.234465
YCL024W	KCC4		DMA	1.2	1	1.1	0.141421	0.137504
YCL025C	AGP1		DMA	1.2	1	1.1	0.141421	0.137504
YCL026C	YCL026C		DMA	1.4	1.3	1.35	0.0707107	0.432959
YCL026C-A	FRM2		DMA	1	1.7	1.35	0.494975	0.432959
YCL027W	FUS1		DMA	1.7	1.6	1.65	0.0707107	0.722466
YCL028W	RNQ1		DMA	1.1	1.2	1.15	0.0707107	0.201634
YCL029C	BIK1		DMA	1.1	1.2	1.15	0.0707107	0.201634
YCL030C	HIS4		DMA	0.3	0.4	0.35	0.0707107	-1.51457
YCL032W	STE50		DMA	0.8	0.7	0.75	0.0707107	-0.415037		1
YCL033C	MXR2		DMA	1.3	1	1.15	0.212132	0.201634
YCL034W	LSB5		DMA	1	1.1	1.05	0.0707107	0.0703893
YCL035C	GRX1		DMA	1.1	1.2	1.15	0.0707107	0.201634
YCL036W	GFD2		DMA	1.4	1.1	1.25	0.212132	0.321928
YCL037C	SRO9		DMA	0.6	0.8	0.7	0.141421	-0.514573
YCL038C	ATG22		DMA	0.9	0.9	0.9	0	-0.152003
YCL039W	GID7		DMA	1.7	1	1.35	0.494975	0.432959
YCL040W	GLK1		DMA	1.3	1.1	1.2	0.141421	0.263034
YCL042W	YCL042W		DMA	1.1	1	1.05	0.0707107	0.0703893
YCL044C	MGR1		DMA	1.1	1	1.05	0.0707107	0.0703893
YCL045C	EMC1		DMA	1.1	1.1	1.1	0	0.137504
YCL046W	YCL046W		DMA	0.9	1.1	1	0.141421	0
YCL047C	POF1		DMA	1.2	1.6	1.4	0.282843	0.485427
YCL048W	SPS22		DMA	1.1	1.1	1.1	0	0.137504
YCL049C	YCL049C		DMA	1.1	1	1.05	0.0707107	0.0703893
YCL050C	APA1		DMA	1.2	1	1.1	0.141421	0.137504
YCL051W	LRE1		DMA	1.2	1.7	1.45	0.353553	0.536053
YCL052C	PBN1	pbn1-ph	TSv6	1.16809	1.2714	1.21975	0.0730527	0.286581
YCL055W	KAR4		DMA	1.1	0.9	1	0.141421	0
YCL056C	PEX34		DMA	1.7	1.3	1.5	0.282843	0.584963
YCL057W	PRD1		DMA	1.1	1.2	1.15	0.0707107	0.201634
YCL059C	KRR1	krr1-18	TSv6	1.1151	1.40672	1.26091	0.206207	0.334466
YCL059C	KRR1	krr1-17	TSv6	2.01919	1.85639	1.93779	0.115114	0.954411
YCL060C	YCL060C		DMA	0.9	0.9	0.9	0	-0.152003
YCL061C	MRC1		DMA	0.9	0.9	0.9	0	-0.152003
YCL062W	YCL062W		DMA	1.1	0.9	1	0.141421	0	1
YCL063W	VAC17		DMA	1.2	1.1	1.15	0.0707107	0.201634
YCL064C	CHA1		DMA	1.1	1.1	1.1	0	0.137504
YCL069W	VBA3		DMA	0.9	0.7	0.8	0.141421	-0.321928
YCL074W	YCL074W		DMA	0.9	1.4	1.15	0.353553	0.201634
YCL075W	YCL075W		DMA	1.1	1	1.05	0.0707107	0.0703893
YCL076W	YCL076W		DMA	1.1	1.1	1.1	0	0.137504
YCR001W	YCR001W		DMA	2.6	1.4	2	0.848528	1
YCR002C	CDC10	cdc10-5	TSv6	0.67964	0.78904	0.73434	0.0773577	-0.44548
YCR002C	CDC10	cdc10-1	TSv6	1.37105	1.59775	1.4844	0.160302	0.569882
YCR002C	CDC10	cdc10-2	TSv6	2.00705	1.69909	1.85307	0.21776	0.88992
YCR002C	CDC10	cdc10-4	TSv6	1.7383	2.7761	2.2572	0.733842	1.17453
YCR005C	CIT2		DMA	1	1.3	1.15	0.212132	0.201634
YCR006C	YCR006C		DMA	1.8	2.5	2.15	0.494975	1.10434
YCR007C	YCR007C		DMA	1	1.1	1.05	0.0707107	0.0703893
YCR008W	SAT4		DMA	1	0.9	0.95	0.0707107	-0.0740006
YCR009C	RVS161		DMA	0.8	0.8	0.8	0	-0.321928
YCR010C	ADY2		DMA	1.7	1.7	1.7	0	0.765535
YCR011C	ADP1		DMA	1.4	1.4	1.4	0	0.485427
YCR014C	POL4		DMA	1.7	1.4	1.55	0.212132	0.632268
YCR015C	CTO1		DMA	1.6	1.5	1.55	0.0707107	0.632268
YCR016W	YCR016W		DMA	1.1	1.1	1.1	0	0.137504
YCR017C	CWH43		DMA	2.8	1.8	2.3	0.707107	1.20163
YCR019W	MAK32		DMA	2.1	1.3	1.7	0.565685	0.765535
YCR020C	PET18		DMA	1.1	1.1	1.1	0	0.137504
YCR020C-A	MAK31		DMA	1.2	1.1	1.15	0.0707107	0.201634
YCR021C	HSP30		DMA	1.1	1.7	1.4	0.424264	0.485427
YCR022C	YCR022C		DMA	1.6	1.4	1.5	0.141421	0.584963
YCR023C	YCR023C		DMA	1.1	1.7	1.4	0.424264	0.485427
YCR024C-A	PMP1		DMA	1.5	1.3	1.4	0.141421	0.485427
YCR025C	YCR025C		DMA	1.9	1.7	1.8	0.141421	0.847997
YCR026C	NPP1		DMA	2.2	1.5	1.85	0.494975	0.887525
YCR027C	RHB1		DMA	1.7	2.7	2.2	0.707107	1.1375
YCR028C-A	RIM1		DMA	0.6	0.8	0.7	0.141421	-0.514573
YCR030C	SYP1		DMA	1.5	1.4	1.45	0.0707107	0.536053
YCR031C	RPS14A		DMA	1	1.1	1.05	0.0707107	0.0703893
YCR032W	BPH1		DMA	1.1	1.3	1.2	0.141421	0.263034
YCR033W	SNT1		DMA	0.6	0.8	0.7	0.141421	-0.514573
YCR034W	ELO2		DMA	0.8	0.8	0.8	0	-0.321928	1
YCR036W	RBK1		DMA	1	1.2	1.1	0.141421	0.137504
YCR037C	PHO87		DMA	1.1	1.2	1.15	0.0707107	0.201634
YCR042C	TAF2	taf2-1	TSv6	1.08667	0.958477	1.02257	0.0906451	0.0322042
YCR043C	YCR043C		DMA	1.4	1.3	1.35	0.0707107	0.432959
YCR044C	PER1		DMA	1.2	1.3	1.25	0.0707107	0.321928
YCR045C	RRT12		DMA	1.5	1.5	1.5	0	0.584963
YCR048W	ARE1		DMA	1.2	1.2	1.2	0	0.263034
YCR049C	YCR049C		DMA	1.3	1.2	1.25	0.0707107	0.321928
YCR050C	YCR050C		DMA	1.1	1.2	1.15	0.0707107	0.201634
YCR051W	YCR051W		DMA	1.2	1.2	1.2	0	0.263034
YCR052W	RSC6	rsc6-ph	TSv6	1.72687	2.06335	1.89511	0.23793	0.922282
YCR053W	THR4		DMA	0.3	0.4	0.35	0.0707107	-1.51457
YCR059C	YIH1		DMA	1.4	1.2	1.3	0.141421	0.378512
YCR060W	TAH1		DMA	1.1	1.1	1.1	0	0.137504
YCR061W	YCR061W		DMA	1.5	1.3	1.4	0.141421	0.485427
YCR062W	YCR062W		DMA	1.1	1.2	1.15	0.0707107	0.201634
YCR063W	BUD31		DMA	0.4	0.4	0.4	0	-1.32193
YCR065W	HCM1		DMA	1.3	1.1	1.2	0.141421	0.263034
YCR067C	SED4		DMA	1.1	1.7	1.4	0.424264	0.485427
YCR068W	ATG15		DMA	1.4	1.5	1.45	0.0707107	0.536053
YCR069W	CPR4		DMA	1.1	2	1.55	0.636396	0.632268
YCR071C	IMG2		DMA	0.6	0.6	0.6	0	-0.736966
YCR073C	SSK22		DMA	1.1	1.2	1.15	0.0707107	0.201634
YCR073W-A	SOL2		DMA	1.2	1.1	1.15	0.0707107	0.201634
YCR075C	ERS1		DMA	1.5	1.4	1.45	0.0707107	0.536053
YCR076C	FUB1		DMA	1.6	1.5	1.55	0.0707107	0.632268
YCR077C	PAT1		DMA	0.8	0.7	0.75	0.0707107	-0.415037
YCR079W	PTC6		DMA	1.1	1	1.05	0.0707107	0.0703893
YCR081W	SRB8		DMA	0.6	0.6	0.6	0	-0.736966
YCR082W	AHC2		DMA	1.1	1.2	1.15	0.0707107	0.201634
YCR083W	TRX3		DMA	1.5	1.6	1.55	0.0707107	0.632268
YCR085W	YCR085W		DMA	1.1	1.4	1.25	0.212132	0.321928
YCR086W	CSM1		DMA	0.9	0.9	0.9	0	-0.152003
YCR087C-A	YCR087C-A		DMA	1.3	1.3	1.3	0	0.378512
YCR087W	YCR087W		DMA	1.2	1.2	1.2	0	0.263034
YCR088W	ABP1		DMA	1.2	0.9	1.05	0.212132	0.0703893
YCR089W	FIG2		DMA	1.4	1.2	1.3	0.141421	0.378512
YCR090C	YCR090C		DMA	1.2	1.1	1.15	0.0707107	0.201634
YCR091W	KIN82		DMA	1.2	1	1.1	0.141421	0.137504
YCR092C	MSH3		DMA	1.2	1.1	1.15	0.0707107	0.201634
YCR093W	CDC39	cdc39-1	TSv6	1.41938	1.50953	1.46446	0.0637494	0.550366	1
YCR095C	OCA4		DMA	1.5	1	1.25	0.353553	0.321928
YCR098C	GIT1		DMA	1.3	1.4	1.35	0.0707107	0.432959
YCR099C	YCR099C		DMA	1.2	1.2	1.2	0	0.263034
YCR100C	YCR100C		DMA	1.2	1	1.1	0.141421	0.137504
YCR101C	YCR101C		DMA	1.5	1.1	1.3	0.282843	0.378512
YCR102C	YCR102C		DMA	1.3	1.4	1.35	0.0707107	0.432959
YCR102W-A	YCR102W-A		DMA	1.1	1.3	1.2	0.141421	0.263034
YCR105W	ADH7		DMA	1.1	1.3	1.2	0.141421	0.263034
YCR106W	RDS1		DMA	1.1	1.2	1.15	0.0707107	0.201634
YCR107W	AAD3		DMA	1.1	1.5	1.3	0.282843	0.378512
YDL001W	RMD1		DMA	1.1	1.1	1.1	0	0.137504
YDL002C	NHP10		DMA	0.9	0.8	0.85	0.0707107	-0.234465
YDL003W	MCD1	ydl003w-ph	TSv6	1.3382	0.668858	1.00353	0.473296	0.00508285
YDL003W	MCD1	mcd1-73	TSv6	1.63634	1.62365	1.63	0.0089758	0.70487
YDL006W	PTC1		DMA	0.7	0.7	0.7	0	-0.514573
YDL007W	RPT2	rpt2-rf	TSv6	1.79231	1.61132	1.70182	0.127978	0.767074
YDL008W	APC11	apc11-22	TSv6	0.584412	0.600751	0.592582	0.0115535	-0.754914
YDL008W	APC11	apc11-13	TSv6	0.786243	0.76593	0.776087	0.0143639	-0.36571
YDL010W	GRX6		DMA	1.1	0.9	1	0.141421	0
YDL011C	YDL011C		DMA	1.2	1	1.1	0.141421	0.137504
YDL012C	YDL012C		DMA	1.3	1.1	1.2	0.141421	0.263034
YDL013W	SLX5		DMA	0.3	0.3	0.3	0	-1.73697
YDL014W	NOP1	nop1-2	TSv6	0.229017	0.123091	0.176054	0.0749013	-2.50591
YDL014W	NOP1	nop1-3	TSv6	2.14976	1.80378	1.97677	0.244645	0.983145
YDL015C	TSC13	tsc13-ph	TSv6	0.497574	0.466859	0.482216	0.0217192	-1.05225	1
YDL017W	CDC7	cdc7-1	TSv6	1.27054	1.07402	1.17228	0.138962	0.229316
YDL017W	CDC7	cdc7-4	TSv6	1.53309	1.50394	1.51851	0.0206121	0.60266
YDL018C	ERP3		DMA	1.5	1.3	1.4	0.141421	0.485427
YDL019C	OSH2		DMA	1.2	1.1	1.15	0.0707107	0.201634
YDL020C	RPN4		DMA	0.8	0.8	0.8	0	-0.321928
YDL023C	YDL023C		DMA	1.2	1.5	1.35	0.212132	0.432959
YDL024C	DIA3		DMA	1.1	1	1.05	0.0707107	0.0703893
YDL025C	RTK1		DMA	1.7	1.2	1.45	0.353553	0.536053
YDL026W	YDL026W		DMA	1.4	1.3	1.35	0.0707107	0.432959
YDL027C	MRX9		DMA	1	1.1	1.05	0.0707107	0.0703893
YDL028C	MPS1	mps1-1	TSv6	0.247764	0.118133	0.182948	0.0916634	-2.45049
YDL028C	MPS1	mps1-6	TSv6	0.249648	0.206792	0.22822	0.0303034	-2.1315
YDL028C	MPS1	mps1-3796	TSv6	1.39992	1.36633	1.38313	0.0237548	0.467934	1
YDL028C	MPS1	mps1-417	TSv6	1.66796	1.27131	1.46964	0.280476	0.555459
YDL029W	ARP2	arp2-14	TSv6	1.2161	1.02129	1.1187	0.137749	0.161821
YDL030W	PRP9	prp9-ts	TSv6	0.674918	0.719412	0.697165	0.0314614	-0.520428
YDL030W	PRP9	prp9-1	TSv6	0.364024	1.96579	1.16491	1.13262	0.220217
YDL033C	SLM3		DMA	0.6	0.5	0.55	0.0707107	-0.862496
YDL034W	YDL034W		DMA	0.8	1.2	1	0.282843	0
YDL035C	GPR1		DMA	1.4	1	1.2	0.282843	0.263034	1
YDL036C	PUS9		DMA	1.5	1.2	1.35	0.212132	0.432959
YDL037C	BSC1		DMA	1.4	1.1	1.25	0.212132	0.321928
YDL038C	YDL038C		DMA	1.5	1.3	1.4	0.141421	0.485427
YDL039C	PRM7		DMA	1.2	1.6	1.4	0.282843	0.485427
YDL040C	NAT1		DMA	1.3	1.6	1.45	0.212132	0.536053
YDL041W	YDL041W		DMA	0.2	0.2	0.2	0	-2.32193
YDL042C	SIR2		DMA	0.2	0.2	0.2	0	-2.32193
YDL043C	PRP11	prp11-ts	TSv6	1.17599	1.14506	1.16052	0.0218692	0.214774
YDL045C	FAD1	fad1-ph	TSv6	1.2713	1.40464	1.33797	0.0942874	0.420047
YDL046W	NPC2		DMA	1.4	1.4	1.4	0	0.485427
YDL048C	STP4		DMA	1	1.2	1.1	0.141421	0.137504
YDL050C	YDL050C		DMA	2	1.4	1.7	0.424264	0.765535
YDL051W	LHP1		DMA	1.4	1.2	1.3	0.141421	0.378512
YDL052C	SLC1		DMA	1	1.1	1.05	0.0707107	0.0703893
YDL053C	PBP4		DMA	1	1.1	1.05	0.0707107	0.0703893
YDL054C	MCH1		DMA	1.1	0.9	1	0.141421	0
YDL056W	MBP1		DMA	1.4	1.4	1.4	0	0.485427
YDL058W	USO1	uso1-1	TSv6	1.49867	1.34864	1.42365	0.106088	0.509596
YDL059C	RAD59		DMA	1.2	1.4	1.3	0.141421	0.378512
YDL061C	RPS29B		DMA	0.8	0.6	0.7	0.141421	-0.514573
YDL062W	YDL062W		DMA	0.8	0.8	0.8	0	-0.321928
YDL064W	UBC9	ubc9-2	TSv6	1.4141	1.38267	1.39838	0.0222204	0.48376
YDL065C	PEX19		DMA	1	0.9	0.95	0.0707107	-0.0740006
YDL066W	IDP1		DMA	1.1	0.9	1	0.141421	0
YDL070W	BDF2		DMA	0.7	0.8	0.75	0.0707107	-0.415037
YDL071C	YDL071C		DMA	1.2	0.9	1.05	0.212132	0.0703893
YDL074C	BRE1		DMA	0.5	0.8	0.65	0.212132	-0.621488
YDL074C	BRE1		DMA	0.7	0.7	0.7	0	-0.514573
YDL076C	RXT3		DMA	1	0.7	0.85	0.212132	-0.234465
YDL077C	VAM6		DMA	0.6	0.7	0.65	0.0707107	-0.621488	1
YDL078C	MDH3		DMA	0.8	1	0.9	0.141421	-0.152003
YDL079C	MRK1		DMA	1.1	1.2	1.15	0.0707107	0.201634
YDL080C	THI3		DMA	0.8	0.7	0.75	0.0707107	-0.415037	1
YDL081C	RPP1A		DMA	0.6	0.6	0.6	0	-0.736966
YDL082W	RPL13A		DMA	0.8	0.7	0.75	0.0707107	-0.415037
YDL083C	RPS16B		DMA	0.7	0.6	0.65	0.0707107	-0.621488
YDL084W	SUB2	sub2-1	TSv6	1.46302	1.56682	1.51492	0.0734024	0.599243
YDL085W	NDE2		DMA	1.2	1.1	1.15	0.0707107	0.201634
YDL086W	YDL086W		DMA	1.2	1.1	1.15	0.0707107	0.201634
YDL087C	LUC7	luc7-1	TSv6	1.67138	1.60875	1.64007	0.0442846	0.713753
YDL088C	ASM4		DMA	1	1.3	1.15	0.212132	0.201634
YDL089W	NUR1		DMA	1.2	1	1.1	0.141421	0.137504
YDL090C	RAM1		DMA	0.2	0.2	0.2	0	-2.32193
YDL090C	RAM1	ram1-119	TSv6	0.878567	0.560841	0.719704	0.224666	-0.474524
YDL091C	UBX3		DMA	1	0.9	0.95	0.0707107	-0.0740006
YDL093W	PMT5		DMA	1.2	1.2	1.2	0	0.263034
YDL094C	YDL094C		DMA	1.2	1.1	1.15	0.0707107	0.201634
YDL095W	PMT1		DMA	1.3	1.2	1.25	0.0707107	0.321928
YDL096C	OPI6		DMA	1	1	1	0	0	1
YDL097C	RPN6	rpn6-ph	TSv6	0.938959	0.968735	0.953847	0.0210552	-0.06817
YDL097C	RPN6	rpn6-1	TSv6	1.29488	1.50152	1.3982	0.146113	0.483572
YDL098C	SNU23	snu23-ph	TSv6	1.56963	1.66276	1.6162	0.0658504	0.692602
YDL099W	BUG1		DMA	1.3	1	1.15	0.212132	0.201634
YDL100C	GET3		DMA	1	0.9	0.95	0.0707107	-0.0740006
YDL102W	POL3	cdc2-7	TSv6	1.06132	1.04278	1.05205	0.0131121	0.0731999	1
YDL102W	POL3	cdc2-1	TSv6	1.35481	1.13303	1.24392	0.156821	0.314892
YDL102W	POL3	cdc2-2	TSv6	1.6647	1.42951	1.5471	0.166305	0.629568
YDL103C	QRI1	qri1-ph	TSv6	0.601841	0.520065	0.560953	0.0578241	-0.834049
YDL103C	QRI1	qri1-ts6	TSv6	1.12707	1.07125	1.09916	0.039471	0.136399
YDL103C	QRI1	qri1-ts1	TSv6	1.53081	1.69677	1.61379	0.117346	0.690453
YDL104C	QRI7		DMA	0.9	1	0.95	0.0707107	-0.0740006
YDL105W	NSE4	nse4-ph	TSv6	0.175025	0.475013	0.325019	0.212123	-1.6214	1
YDL105W	NSE4	nse4-ts2	TSv6	0.795893	0.677592	0.736742	0.0836516	-0.440768	1
YDL105W	NSE4	nse4-ts3	TSv6	0.938612	0.923439	0.931026	0.0107291	-0.103107
YDL105W	NSE4	nse4-ts4	TSv6	0.918083	1.01511	0.966599	0.0686116	-0.0490106	1
YDL105W	NSE4	nse4-ts1	TSv6	1.02459	1.16847	1.09653	0.101737	0.132947
YDL106C	PHO2		DMA	0.9	0.9	0.9	0	-0.152003
YDL108W	KIN28	kin28-ts	TSv6	0.42124	0.620223	0.520732	0.140702	-0.941388
YDL109C	YDL109C		DMA	1.1	1.1	1.1	0	0.137504
YDL110C	TMA17		DMA	1	1	1	0	0
YDL111C	RRP42	rrp42-ph	TSv6	1.03927	1.04662	1.04294	0.00520215	0.0606622
YDL112W	TRM3		DMA	0.9	1.1	1	0.141421	0
YDL113C	ATG20		DMA	0.9	1.1	1	0.141421	0
YDL114W	YDL114W		DMA	1.3	1	1.15	0.212132	0.201634
YDL117W	CYK3		DMA	0.8	1	0.9	0.141421	-0.152003
YDL118W	YDL118W		DMA	1	1	1	0	0
YDL119C	HEM25		DMA	0.9	0.9	0.9	0	-0.152003
YDL121C	YDL121C		DMA	1	1	1	0	0
YDL122W	UBP1		DMA	1.2	1.1	1.15	0.0707107	0.201634
YDL123W	SNA4		DMA	1.2	1.2	1.2	0	0.263034
YDL124W	YDL124W		DMA	1.2	1.3	1.25	0.0707107	0.321928
YDL125C	HNT1		DMA	1.2	1.1	1.15	0.0707107	0.201634
YDL126C	CDC48	cdc48-1	TSv6	0.136752	0.349846	0.243299	0.15068	-2.0392	1
YDL126C	CDC48	cdc48-4601	TSv6	0.495016	0.533925	0.51447	0.0275128	-0.95884
YDL126C	CDC48	cdc48-2	TSv6	1.27628	1.42429	1.35028	0.10466	0.43326
YDL126C	CDC48	cdc48-9	TSv6	1.2519	1.45159	1.35174	0.141199	0.434821
YDL126C	CDC48	cdc48-3	TSv6	1.61236	1.59085	1.60161	0.0152097	0.679521
YDL127W	PCL2		DMA	1.1	0.9	1	0.141421	0
YDL128W	VCX1		DMA	1.1	0.8	0.95	0.212132	-0.0740006
YDL129W	YDL129W		DMA	1.2	1.4	1.3	0.141421	0.378512
YDL130W	RPP1B		DMA	0.8	0.8	0.8	0	-0.321928
YDL130W-A	STF1		DMA	1.3	2.3	1.8	0.707107	0.847997
YDL131W	LYS21		DMA	0.9	1.2	1.05	0.212132	0.0703893
YDL132W	CDC53	cdc53-1	TSv6	0.543624	0.603925	0.573775	0.0426394	-0.801444	1
YDL132W	CDC53	cdc53-1	TSv6	0.689007	0.480787	0.584897	0.147234	-0.773745	1
YDL133C-A	RPL41B		DMA	1.3	0.9	1.1	0.282843	0.137504
YDL133C-A	RPL41B		DMA	1.1	1.2	1.15	0.0707107	0.201634
YDL133W	SRF1		DMA	1.1	1.4	1.25	0.212132	0.321928	1
YDL134C	PPH21		DMA	1.5	1.6	1.55	0.0707107	0.632268
YDL135C	RDI1		DMA	1.3	1.2	1.25	0.0707107	0.321928
YDL136W	RPL35B		DMA	0.8	0.9	0.85	0.0707107	-0.234465
YDL137W	ARF2		DMA	0.8	1.2	1	0.282843	0
YDL138W	RGT2		DMA	1.3	1.3	1.3	0	0.378512
YDL140C	RPO21	rpo21-1	TSv6	0.580909	0.670162	0.625535	0.0631112	-0.676837
YDL142C	CRD1		DMA	0.9	0.9	0.9	0	-0.152003
YDL143W	CCT4	cct4-1	TSv6	0.673526	0.546637	0.610082	0.0897237	-0.712926
YDL144C	YDL144C		DMA	1.1	1.2	1.15	0.0707107	0.201634
YDL145C	COP1	cop1-1	TSv6	1.42459	1.60564	1.51512	0.128026	0.599428
YDL146W	LDB17		DMA	0.9	1.2	1.05	0.212132	0.0703893
YDL147W	RPN5	rpn5-ph	TSv6	1.03213	1.08592	1.05902	0.0380343	0.0827324	1
YDL147W	RPN5	rpn5-1	TSv6	1.085	1.53825	1.31162	0.320498	0.391352	1
YDL148C	NOP14	ydl148c-ph	TSv6	0.246452	0.182141	0.214297	0.0454752	-2.22232	1
YDL149W	ATG9		DMA	0.9	0.9	0.9	0	-0.152003
YDL154W	MSH5		DMA	1.1	1.2	1.15	0.0707107	0.201634
YDL155W	CLB3		DMA	1	1.2	1.1	0.141421	0.137504
YDL156W	CMR1		DMA	1	0.9	0.95	0.0707107	-0.0740006
YDL157C	YDL157C		DMA	1.1	1.1	1.1	0	0.137504
YDL159W	STE7		DMA	0.2	0.2	0.2	0	-2.32193
YDL160C	DHH1		DMA	0.2	0.2	0.2	0	-2.32193
YDL161W	ENT1		DMA	1.8	1.3	1.55	0.353553	0.632268
YDL162C	YDL162C		DMA	1.3	1.4	1.35	0.0707107	0.432959
YDL164C	CDC9	cdc9-1	TSv6	1.21115	1.38593	1.29854	0.123586	0.376887
YDL165W	CDC36	cdc36-16	TSv6	1.2594	1.31616	1.28778	0.0401346	0.36489
YDL167C	NRP1		DMA	1.1	1	1.05	0.0707107	0.0703893
YDL168W	SFA1		DMA	1.2	1	1.1	0.141421	0.137504
YDL169C	UGX2		DMA	1	1.1	1.05	0.0707107	0.0703893
YDL170W	UGA3		DMA	1.4	1.3	1.35	0.0707107	0.432959
YDL171C	GLT1		DMA	1.2	1.1	1.15	0.0707107	0.201634
YDL172C	YDL172C		DMA	0.9	1	0.95	0.0707107	-0.0740006
YDL173W	PAR32		DMA	1	0.9	0.95	0.0707107	-0.0740006
YDL174C	DLD1		DMA	1.5	1.1	1.3	0.282843	0.378512
YDL175C	AIR2		DMA	1.3	1.1	1.2	0.141421	0.263034		1
YDL176W	YDL176W		DMA	1.1	1	1.05	0.0707107	0.0703893
YDL177C	YDL177C		DMA	1	1.2	1.1	0.141421	0.137504
YDL178W	DLD2		DMA	1.1	1.2	1.15	0.0707107	0.201634
YDL179W	PCL9		DMA	1.1	1.1	1.1	0	0.137504
YDL180W	YDL180W		DMA	0.8	1	0.9	0.141421	-0.152003
YDL181W	INH1		DMA	0.8	1	0.9	0.141421	-0.152003
YDL182W	LYS20		DMA	0.8	0.6	0.7	0.141421	-0.514573
YDL183C	YDL183C		DMA	0.8	0.9	0.85	0.0707107	-0.234465
YDL184C	RPL41A		DMA	1.1	1	1.05	0.0707107	0.0703893
YDL185W	VMA1		DMA	1.1	1	1.05	0.0707107	0.0703893
YDL186W	YDL186W		DMA	1	1	1	0	0
YDL187C	YDL187C		DMA	1.2	1.2	1.2	0	0.263034
YDL188C	PPH22		DMA	1	0.9	0.95	0.0707107	-0.0740006
YDL189W	RBS1		DMA	1.1	1.1	1.1	0	0.137504
YDL190C	UFD2		DMA	1.2	0.9	1.05	0.212132	0.0703893
YDL191W	RPL35A		DMA	0.7	0.8	0.75	0.0707107	-0.415037
YDL192W	ARF1		DMA	0.5	0.5	0.5	0	-1		1
YDL193W	NUS1	nus1-ph	TSv6	1.37099	1.24446	1.30772	0.0894678	0.387057
YDL194W	SNF3		DMA	0.8	0.8	0.8	0	-0.321928
YDL195W	SEC31	sec31-1	TSv6	1.81389	1.96467	1.88928	0.106621	0.917835
YDL197C	ASF2		DMA	0.9	1	0.95	0.0707107	-0.0740006
YDL199C	YDL199C		DMA	1.2	0.8	1	0.282843	0
YDL200C	MGT1		DMA	1.7	1.2	1.45	0.353553	0.536053
YDL201W	TRM8		DMA	1	1.2	1.1	0.141421	0.137504
YDL203C	ACK1		DMA	1.1	1	1.05	0.0707107	0.0703893
YDL204W	RTN2		DMA	1	1.1	1.05	0.0707107	0.0703893
YDL206W	YDL206W		DMA	1	1.1	1.05	0.0707107	0.0703893
YDL207W	GLE1	gle1-4	TSv6	0.774754	0.736426	0.75559	0.0271017	-0.404324	1
YDL207W	GLE1	gle1-2	TSv6	1.36331	1.22713	1.29522	0.0962928	0.373193
YDL208W	NHP2	nhp2-ph	TSv6	1.29108	1.30747	1.29927	0.0115927	0.377705
YDL209C	CWC2	cwc2-1	TSv6	1.47817	1.33689	1.40753	0.0999002	0.493169
YDL210W	UGA4		DMA	1.3	1	1.15	0.212132	0.201634
YDL211C	YDL211C		DMA	1.1	1.2	1.15	0.0707107	0.201634
YDL213C	NOP6		DMA	0.8	0.8	0.8	0	-0.321928
YDL214C	PRR2		DMA	1	1.3	1.15	0.212132	0.201634
YDL215C	GDH2		DMA	0.8	1	0.9	0.141421	-0.152003
YDL216C	RRI1		DMA	1	1.1	1.05	0.0707107	0.0703893
YDL217C	TIM22	tim22-19	TSv6	1.08205	1.42977	1.25591	0.245874	0.328729
YDL218W	YDL218W		DMA	1.2	1.2	1.2	0	0.263034
YDL219W	DTD1		DMA	1.3	1.1	1.2	0.141421	0.263034
YDL220C	CDC13	cdc13-1	TSv6	1.5391	1.49998	1.51954	0.0276623	0.603637
YDL222C	FMP45		DMA	0.9	1.4	1.15	0.353553	0.201634
YDL223C	HBT1		DMA	1	1.3	1.15	0.212132	0.201634
YDL224C	WHI4		DMA	1.6	0.9	1.25	0.494975	0.321928
YDL226C	GCS1		DMA	1.1	1.4	1.25	0.212132	0.321928
YDL227C	HO		DMA	0.8	1.1	0.95	0.212132	-0.0740006
YDL229W	SSB1		DMA	1.2	1	1.1	0.141421	0.137504
YDL230W	PTP1		DMA	1.2	1.4	1.3	0.141421	0.378512
YDL231C	BRE4		DMA	1.1	1.2	1.15	0.0707107	0.201634
YDL232W	OST4		DMA	0.6	0.5	0.55	0.0707107	-0.862496
YDL233W	MFG1		DMA	1.5	1.7	1.6	0.141421	0.678072
YDL234C	GYP7		DMA	1.4	1.2	1.3	0.141421	0.378512
YDL236W	PHO13		DMA	1.1	1.4	1.25	0.212132	0.321928
YDL237W	AIM6		DMA	3.1	3.2	3.15	0.0707107	1.65535
YDL238C	GUD1		DMA	1.4	1.3	1.35	0.0707107	0.432959
YDL239C	ADY3		DMA	0.8	1.2	1	0.282843	0
YDL240W	LRG1		DMA	1.1	1.1	1.1	0	0.137504
YDL241W	YDL241W		DMA	1	1.1	1.05	0.0707107	0.0703893
YDL242W	YDL242W		DMA	1.6	1.1	1.35	0.353553	0.432959
YDL243C	AAD4		DMA	1.1	1	1.05	0.0707107	0.0703893
YDR001C	NTH1		DMA	1.1	1.1	1.1	0	0.137504
YDR002W	YRB1	yrb1-51	TSv6	1.04794	0.926464	0.987204	0.0858992	-0.0185802	1
YDR003W	RCR2		DMA	1	1.6	1.3	0.424264	0.378512
YDR004W	RAD57		DMA	0.9	1.1	1	0.141421	0
YDR005C	MAF1		DMA	1.2	1.1	1.15	0.0707107	0.201634
YDR006C	SOK1		DMA	1	1	1	0	0
YDR007W	TRP1		DMA	1.2	1.3	1.25	0.0707107	0.321928
YDR008C	YDR008C		DMA	1.2	1.2	1.2	0	0.263034
YDR009W	GAL3		DMA	1	1.2	1.1	0.141421	0.137504
YDR010C	YDR010C		DMA	1.2	1.1	1.15	0.0707107	0.201634
YDR011W	SNQ2		DMA	1.3	1.1	1.2	0.141421	0.263034
YDR013W	PSF1	psf1-1	TSv6	1.19918	1.20111	1.20015	0.00136069	0.26321
YDR014W	RAD61		DMA	1.1	0.9	1	0.141421	0
YDR015C	YDR015C		DMA	1.1	1.2	1.15	0.0707107	0.201634
YDR016C	DAD1	dad1-ph	TSv6	1.78423	1.30886	1.54654	0.336137	0.629048
YDR018C	YDR018C		DMA	1.2	1.3	1.25	0.0707107	0.321928
YDR019C	GCV1		DMA	1.4	1.4	1.4	0	0.485427
YDR020C	DAS2		DMA	1.3	1.6	1.45	0.212132	0.536053
YDR021W	FAL1	fal1-1	TSv6	0.794695	0.991321	0.893008	0.139036	-0.163255
YDR022C	ATG31		DMA	1.8	1.6	1.7	0.141421	0.765535
YDR024W	FYV1		DMA	0.6	0.7	0.65	0.0707107	-0.621488
YDR025W	RPS11A		DMA	0.7	0.7	0.7	0	-0.514573
YDR026C	NSI1		DMA	1	1.5	1.25	0.353553	0.321928
YDR029W	YDR029W		DMA	1.4	1.1	1.25	0.212132	0.321928
YDR030C	RAD28		DMA	1.1	1	1.05	0.0707107	0.0703893
YDR031W	MIX14		DMA	1.1	1.1	1.1	0	0.137504
YDR032C	PST2		DMA	0.9	0.9	0.9	0	-0.152003
YDR033W	MRH1		DMA	1	1	1	0	0
YDR034C	LYS14		DMA	0.3	0.3	0.3	0	-1.73697
YDR035W	ARO3		DMA	1.1	1.1	1.1	0	0.137504
YDR036C	EHD3		DMA	1.1	1	1.05	0.0707107	0.0703893
YDR042C	YDR042C		DMA	1.1	1	1.05	0.0707107	0.0703893	1
YDR043C	NRG1		DMA	1.2	1	1.1	0.141421	0.137504
YDR044W	HEM13	hem13-ph	TSv6	1.30848	1.41899	1.36373	0.0781419	0.447558
YDR045C	RPC11	rpc11-ph	TSv6	1.58661	2.11432	1.85047	0.373145	0.887889
YDR046C	BAP3		DMA	1.3	1.2	1.25	0.0707107	0.321928
YDR048C	YDR048C		DMA	1	1.1	1.05	0.0707107	0.0703893	1
YDR049W	VMS1		DMA	0.8	0.8	0.8	0	-0.321928
YDR050C	TPI1	tpi1-1670	TSv6	2.17187	2.32303	2.24745	0.106887	1.16829
YDR051C	DET1		DMA	0.9	0.8	0.85	0.0707107	-0.234465
YDR052C	DBF4	dbf4-2	TSv6	1.00494	0.944262	0.9746	0.042904	-0.0371181
YDR052C	DBF4	dbf4-ts	TSv6	1.17717	1.29765	1.23741	0.0851967	0.307323
YDR052C	DBF4	dbf4-1	TSv6	1.5619	1.5234	1.54265	0.0272293	0.625411
YDR052C	DBF4	dbf4-3	TSv6	1.56813	1.58585	1.57699	0.0125292	0.657174
YDR052C	DBF4	dbf4-4	TSv6	1.79977	1.77255	1.78616	0.0192458	0.836864
YDR054C	CDC34	cdc34-2	TSv6	0.105346	0.202806	0.154076	0.0689142	-2.69829
YDR054C	CDC34	cdc34-1	TSv6	1.3083	1.34107	1.32468	0.0231716	0.405649
YDR055W	PST1		DMA	1.1	1.2	1.15	0.0707107	0.201634
YDR056C	EMC10		DMA	0.9	1	0.95	0.0707107	-0.0740006
YDR057W	YOS9		DMA	1.2	1.3	1.25	0.0707107	0.321928	1
YDR058C	TGL2		DMA	1.4	1.2	1.3	0.141421	0.378512
YDR059C	UBC5		DMA	1.5	1.3	1.4	0.141421	0.485427
YDR060W	MAK21	mak21-3	TSv6	0.802443	0.785756	0.7941	0.0117991	-0.332608
YDR060W	MAK21	mak21-1	TSv6	1.44666	1.49892	1.47279	0.0369538	0.558556
YDR061W	YDR061W		DMA	1.3	1.2	1.25	0.0707107	0.321928
YDR062W	LCB2	lcb2-16	TSv6	0.531041	0.424972	0.478006	0.0750025	-1.0649
YDR062W	LCB2	lcb2-19	TSv6	0.491119	0.569168	0.530143	0.0551893	-0.915545
YDR062W	LCB2	lcb2-1	TSv6	0.611123	0.556152	0.583638	0.0388704	-0.776855
YDR062W	LCB2	lcb2-2	TSv6	0.360256	0.855638	0.607947	0.350288	-0.717983	1
YDR063W	AIM7		DMA	1.3	1.1	1.2	0.141421	0.263034
YDR064W	RPS13	rps13-ph	TSv6	1.60069	1.53387	1.56728	0.0472488	0.648264
YDR066C	RTR2		DMA	1.1	1	1.05	0.0707107	0.0703893
YDR067C	OCA6		DMA	1.1	1	1.05	0.0707107	0.0703893
YDR068W	DOS2		DMA	1	1.1	1.05	0.0707107	0.0703893
YDR070C	FMP16		DMA	0.9	0.9	0.9	0	-0.152003
YDR071C	PAA1		DMA	0.9	0.7	0.8	0.141421	-0.321928
YDR072C	IPT1		DMA	1.1	1.1	1.1	0	0.137504
YDR073W	SNF11		DMA	1	1	1	0	0
YDR074W	TPS2		DMA	0.9	0.8	0.85	0.0707107	-0.234465	1
YDR075W	PPH3		DMA	1.2	1.1	1.15	0.0707107	0.201634
YDR076W	RAD55		DMA	0.8	0.8	0.8	0	-0.321928
YDR077W	SED1		DMA	1.4	1.1	1.25	0.212132	0.321928
YDR080W	VPS41		DMA	0.7	0.7	0.7	0	-0.514573
YDR081C	PDC2	ydr081c-ph	TSv6	0.338295	0.363314	0.350804	0.0176906	-1.51126
YDR082W	STN1	stn1-13	TSv6	1.04506	0.980169	1.01262	0.0458867	0.018087
YDR083W	RRP8		DMA	0.5	0.7	0.6	0.141421	-0.736966
YDR084C	TVP23		DMA	1.2	1.4	1.3	0.141421	0.378512
YDR085C	AFR1		DMA	1.2	1.2	1.2	0	0.263034
YDR086C	SSS1	sss1-ph	TSv6	1.99504	2.97538	2.48521	0.693205	1.31337
YDR087C	RRP1	rrp1-1	TSv6	0.579031	0.601445	0.590238	0.0158492	-0.76063	1
YDR088C	SLU7	slu7-ts2	TSv6	0.842167	0.857055	0.849611	0.0105274	-0.235126
YDR088C	SLU7	slu7-ts1	TSv6	1.45335	1.53996	1.49665	0.0612431	0.581741
YDR089W	YDR089W		DMA	1	1.3	1.15	0.212132	0.201634
YDR090C	YDR090C		DMA	1.2	1.1	1.15	0.0707107	0.201634
YDR091C	RLI1	rli1-ph	TSv6	1.48158	1.36634	1.42396	0.0814903	0.509908
YDR092W	UBC13		DMA	0.8	1	0.9	0.141421	-0.152003
YDR093W	DNF2		DMA	1.4	1.1	1.25	0.212132	0.321928
YDR094W	YDR094W		DMA	1.2	0.8	1	0.282843	0
YDR095C	YDR095C		DMA	1.2	1.4	1.3	0.141421	0.378512
YDR096W	GIS1		DMA	1	0.9	0.95	0.0707107	-0.0740006
YDR097C	MSH6		DMA	1.1	1	1.05	0.0707107	0.0703893
YDR098C	GRX3		DMA	1	1.1	1.05	0.0707107	0.0703893
YDR099W	BMH2		DMA	0.9	1	0.95	0.0707107	-0.0740006	1
YDR100W	TVP15		DMA	1.3	1	1.15	0.212132	0.201634
YDR101C	ARX1		DMA	0.7	0.8	0.75	0.0707107	-0.415037
YDR102C	YDR102C		DMA	1.4	1	1.2	0.282843	0.263034
YDR103W	STE5		DMA	0.2	0.1	0.15	0.0707107	-2.73697
YDR104C	SPO71		DMA	1.2	1.1	1.15	0.0707107	0.201634
YDR105C	TMS1		DMA	1	1.2	1.1	0.141421	0.137504
YDR107C	TMN2		DMA	1.3	1.4	1.35	0.0707107	0.432959
YDR108W	TRS85		DMA	0.9	1	0.95	0.0707107	-0.0740006
YDR109C	YDR109C		DMA	1.1	1.7	1.4	0.424264	0.485427
YDR110W	FOB1		DMA	1.3	1.2	1.25	0.0707107	0.321928
YDR111C	ALT2		DMA	1.3	1.2	1.25	0.0707107	0.321928
YDR112W	IRC2		DMA	1.4	1.2	1.3	0.141421	0.378512
YDR113C	PDS1	pds1-128	TSv6	1.49352	2.43592	1.96472	0.666372	0.974323
YDR116C	MRPL1		DMA	0.8	0.7	0.75	0.0707107	-0.415037		1
YDR117C	TMA64		DMA	1.2	1.2	1.2	0	0.263034
YDR118W	APC4	apc4-ph	TSv6	1.61833	1.52855	1.57344	0.0634816	0.653923
YDR119W	VBA4		DMA	1.1	1.8	1.45	0.494975	0.536053
YDR120C	TRM1		DMA	1.2	1.3	1.25	0.0707107	0.321928
YDR121W	DPB4		DMA	1.4	1.8	1.6	0.282843	0.678072
YDR122W	KIN1		DMA	1.8	1.2	1.5	0.424264	0.584963
YDR123C	INO2		DMA	0.7	0.7	0.7	0	-0.514573
YDR124W	YDR124W		DMA	1.4	1.7	1.55	0.212132	0.632268
YDR125C	ECM18		DMA	1.2	1.3	1.25	0.0707107	0.321928
YDR126W	SWF1		DMA	0.7	0.8	0.75	0.0707107	-0.415037
YDR127W	ARO1		DMA	0.7	0.7	0.7	0	-0.514573		1
YDR128W	MTC5		DMA	0.8	1	0.9	0.141421	-0.152003
YDR130C	FIN1		DMA	1.4	1.2	1.3	0.141421	0.378512
YDR131C	YDR131C		DMA	1.2	1.2	1.2	0	0.263034
YDR132C	YDR132C		DMA	1.1	1	1.05	0.0707107	0.0703893
YDR133C	YDR133C		DMA	1.1	1.5	1.3	0.282843	0.378512
YDR134C	YDR134C		DMA	1.1	1.8	1.45	0.494975	0.536053
YDR135C	YCF1		DMA	1.4	1.1	1.25	0.212132	0.321928
YDR139C	RUB1		DMA	1.2	1.1	1.15	0.0707107	0.201634
YDR141C	DOP1	dop1-1	TSv6	2.25974	2.16554	2.21264	0.0666106	1.14577
YDR142C	PEX7		DMA	1	0.9	0.95	0.0707107	-0.0740006
YDR143C	SAN1		DMA	1.9	1.8	1.85	0.0707107	0.887525
YDR144C	MKC7		DMA	0.8	0.8	0.8	0	-0.321928
YDR145W	TAF12	taf12-l464a	TSv6	0.205336	0.231762	0.218549	0.0186859	-2.19397
YDR145W	TAF12	taf12-l446a	TSv6	1.0887	1.0568	1.07275	0.022559	0.101312
YDR145W	TAF12	taf12-w486stop	TSv6	1.42917	1.33625	1.38271	0.0657087	0.4675
YDR145W	TAF12	taf12-9	TSv6	1.41811	1.35911	1.38861	0.0417252	0.473641
YDR145W	TAF12	taf12-ts23	TSv6	1.42433	1.57382	1.49907	0.105709	0.584072
YDR146C	SWI5		DMA	0.8	0.9	0.85	0.0707107	-0.234465
YDR147W	EKI1		DMA	1	1.2	1.1	0.141421	0.137504
YDR148C	KGD2		DMA	1.1	1.1	1.1	0	0.137504
YDR149C	YDR149C		DMA	0.7	0.7	0.7	0	-0.514573
YDR150W	NUM1		DMA	0.8	0.9	0.85	0.0707107	-0.234465
YDR151C	CTH1		DMA	1.2	1.9	1.55	0.494975	0.632268
YDR152W	GIR2		DMA	1.7	1.3	1.5	0.282843	0.584963
YDR153C	ENT5		DMA	1.4	1.3	1.35	0.0707107	0.432959
YDR154C	YDR154C		DMA	1.1	1.3	1.2	0.141421	0.263034
YDR155C	CPR1		DMA	1.2	1.3	1.25	0.0707107	0.321928
YDR156W	RPA14		DMA	0.8	1.1	0.95	0.212132	-0.0740006
YDR157W	YDR157W		DMA	1	0.8	0.9	0.141421	-0.152003
YDR158W	HOM2		DMA	0.8	0.8	0.8	0	-0.321928
YDR159W	SAC3		DMA	0.5	0.4	0.45	0.0707107	-1.152		1
YDR161W	ACL4		DMA	0.8	0.9	0.85	0.0707107	-0.234465
YDR162C	NBP2		DMA	0.8	0.9	0.85	0.0707107	-0.234465
YDR163W	CWC15		DMA	1.2	1.2	1.2	0	0.263034
YDR164C	SEC1	sec1-1	TSv6	1.65306	1.55288	1.60297	0.0708368	0.680748
YDR165W	TRM82		DMA	1	1	1	0	0	1
YDR166C	SEC5	sec5-24	TSv6	1.40433	1.62307	1.5137	0.154674	0.598079
YDR167W	TAF10	taf10-ts34	TSv6	0.722602	0.703187	0.712894	0.0137285	-0.48824
YDR168W	CDC37	cdc37-1	TSv6	1.02339	0.810495	0.916943	0.15054	-0.125096
YDR168W	CDC37	cdc37-ts	TSv6	0.90207	0.989372	0.945721	0.0617319	-0.0805139	1
YDR169C	STB3		DMA	1.2	1.1	1.15	0.0707107	0.201634
YDR170C	SEC7	sec7-1	TSv6	1.52512	1.38801	1.45657	0.0969529	0.54257
YDR171W	HSP42		DMA	1.2	1	1.1	0.141421	0.137504
YDR172W	SUP35	sup35-td	TSv6	0.563534	0.642768	0.603151	0.0560265	-0.729409
YDR173C	ARG82		DMA	0.4	0.3	0.35	0.0707107	-1.51457
YDR174W	HMO1		DMA	0.4	0.4	0.4	0	-1.32193
YDR178W	SDH4		DMA	1.3	1.4	1.35	0.0707107	0.432959
YDR179C	CSN9		DMA	1.1	1.1	1.1	0	0.137504
YDR179W-A	NVJ3		DMA	1.1	1	1.05	0.0707107	0.0703893
YDR180W	SCC2	scc2-4	TSv6	1.27219	1.3456	1.3089	0.0519082	0.38835
YDR181C	SAS4		DMA	1.3	1	1.15	0.212132	0.201634
YDR182W	CDC1	cdc1-4	TSv6	0.51425	0.783106	0.648678	0.19011	-0.624426
YDR182W	CDC1	cdc1-1	TSv6	0.687041	0.991303	0.839172	0.215145	-0.252962
YDR182W	CDC1	cdc1-6	TSv6	0.981047	0.949525	0.965286	0.0222897	-0.0509719
YDR182W	CDC1	cdc1-2	TSv6	1.67722	1.59965	1.63843	0.0548501	0.712316
YDR183W	PLP1		DMA	1	0.8	0.9	0.141421	-0.152003
YDR184C	ATC1		DMA	0.9	0.9	0.9	0	-0.152003
YDR185C	UPS3		DMA	1.3	1.1	1.2	0.141421	0.263034
YDR186C	YDR186C		DMA	1.1	1.2	1.15	0.0707107	0.201634
YDR188W	CCT6	cct6-18	TSv6	0.82043	0.673315	0.746873	0.104026	-0.421066
YDR189W	SLY1	sly1-ts	TSv6	1.3862	1.56232	1.47426	0.124537	0.55999
YDR191W	HST4		DMA	1	0.9	0.95	0.0707107	-0.0740006
YDR192C	NUP42		DMA	1.1	0.9	1	0.141421	0
YDR193W	YDR193W		DMA	1.3	1.1	1.2	0.141421	0.263034
YDR196C	CAB5	cab5-1	TSv6	0.960392	0.979509	0.96995	0.0135177	-0.0440175
YDR196C	CAB5	cab5-ph	TSv6	1.2122	1.3099	1.26105	0.0690802	0.334627
YDR198C	RKM2		DMA	1.2	1.1	1.15	0.0707107	0.201634
YDR199W	YDR199W		DMA	1.5	1	1.25	0.353553	0.321928
YDR201W	SPC19	spc19-ph	TSv6	0.579078	0.721701	0.650389	0.10085	-0.620624
YDR202C	RAV2		DMA	1	1.1	1.05	0.0707107	0.0703893
YDR203W	YDR203W		DMA	1	1.1	1.05	0.0707107	0.0703893
YDR205W	MSC2		DMA	1.5	1	1.25	0.353553	0.321928
YDR206W	EBS1		DMA	0.9	1.2	1.05	0.212132	0.0703893
YDR207C	UME6		DMA	0.4	0.5	0.45	0.0707107	-1.152		1
YDR208W	MSS4	mss4-102	TSv6	0.408923	0.387252	0.398088	0.0153236	-1.32884
YDR208W	MSS4	mss4-103	TSv6	1.61828	1.20088	1.40958	0.295151	0.495266
YDR209C	YDR209C		DMA	1.1	1.2	1.15	0.0707107	0.201634
YDR210W	YDR210W		DMA	1	1.1	1.05	0.0707107	0.0703893
YDR212W	TCP1	tcp1-1	TSv6	1.30591	1.23181	1.26886	0.0524015	0.343532
YDR212W	TCP1	tcp1-2	TSv6	1.27648	1.32769	1.30208	0.0362139	0.380821
YDR213W	UPC2		DMA	1	1.3	1.15	0.212132	0.201634
YDR214W	AHA1		DMA	1.1	0.9	1	0.141421	0
YDR215C	YDR215C		DMA	1.3	1.1	1.2	0.141421	0.263034
YDR216W	ADR1		DMA	1.2	0.9	1.05	0.212132	0.0703893
YDR217C	RAD9		DMA	1	1.1	1.05	0.0707107	0.0703893
YDR218C	SPR28		DMA	1	1	1	0	0
YDR219C	MFB1		DMA	0.9	0.8	0.85	0.0707107	-0.234465
YDR220C	YDR220C		DMA	1.8	1.1	1.45	0.494975	0.536053
YDR221W	GTB1		DMA	1.4	1.7	1.55	0.212132	0.632268
YDR222W	YDR222W		DMA	1.9	1.3	1.6	0.424264	0.678072
YDR223W	CRF1		DMA	1.3	1	1.15	0.212132	0.201634
YDR225W	HTA1		DMA	0.8	0.8	0.8	0	-0.321928
YDR227W	SIR4		DMA	0.2	0.2	0.2	0	-2.32193
YDR228C	PCF11	pcf11-2	TSv6	1.13084	0.998484	1.06466	0.0935888	0.0903945
YDR228C	PCF11	pcf11-1	TSv6	1.20505	1.17672	1.19088	0.0200307	0.252033
YDR228C	PCF11	pcf11-ts2	TSv6	1.19044	1.35399	1.27221	0.115648	0.34734
YDR228C	PCF11	pcf11-ts9	TSv6	1.42122	1.1923	1.30676	0.161875	0.385995
YDR228C	PCF11	pcf11-ts10	TSv6	1.80698	1.59254	1.69976	0.151632	0.765327
YDR229W	IVY1		DMA	1.2	1.2	1.2	0	0.263034
YDR233C	RTN1		DMA	0.9	1.2	1.05	0.212132	0.0703893
YDR234W	LYS4		DMA	0.3	0.3	0.3	0	-1.73697		1
YDR235W	PRP42	prp42-ph	TSv6	0.219575	0.316716	0.268146	0.0686888	-1.89891
YDR236C	FMN1	ydr236c-ph	TSv6	1.08315	1.13993	1.11154	0.0401543	0.152559
YDR238C	SEC26	sec26-f856aw860a	TSv6	1.77303	1.4177	1.59537	0.251253	0.673887
YDR238C	SEC26	sec26-11d26	TSv6	1.9099	1.82047	1.86519	0.063236	0.899321
YDR239C	YDR239C		DMA	1.2	1.3	1.25	0.0707107	0.321928
YDR240C	SNU56	ydr240c-ph	TSv6	1.52832	1.53698	1.53265	0.0061249	0.616031
YDR241W	BUD26		DMA	0.7	0.7	0.7	0	-0.514573
YDR242W	AMD2		DMA	1.1	1	1.05	0.0707107	0.0703893
YDR243C	PRP28	prp28-101	TSv6	1.53901	1.77117	1.65509	0.164163	0.726906
YDR244W	PEX5		DMA	1	1.5	1.25	0.353553	0.321928
YDR245W	MNN10		DMA	0.5	0.6	0.55	0.0707107	-0.862496
YDR245W	MNN10	mnn10-supp1	TSv6	0.820975	0.83832	0.829647	0.0122644	-0.26943
YDR246W	TRS23	trs23-ph	TSv6	1.01032	0.882812	0.946568	0.0901648	-0.0792219
YDR247W	VHS1		DMA	0.9	1.1	1	0.141421	0
YDR248C	YDR248C		DMA	1.4	1.3	1.35	0.0707107	0.432959
YDR249C	YDR249C		DMA	1.4	1.2	1.3	0.141421	0.378512
YDR250C	YDR250C		DMA	1.5	1.2	1.35	0.212132	0.432959
YDR251W	PAM1		DMA	1.2	1.1	1.15	0.0707107	0.201634
YDR252W	BTT1		DMA	1.2	1.1	1.15	0.0707107	0.201634
YDR253C	MET32		DMA	1	0.9	0.95	0.0707107	-0.0740006
YDR254W	CHL4		DMA	1.2	1.2	1.2	0	0.263034
YDR255C	RMD5		DMA	1.2	1.4	1.3	0.141421	0.378512
YDR256C	CTA1		DMA	2	1.8	1.9	0.141421	0.925999
YDR257C	RKM4		DMA	1	1	1	0	0
YDR258C	HSP78		DMA	1.1	1.2	1.15	0.0707107	0.201634
YDR259C	YAP6		DMA	0.8	1.7	1.25	0.636396	0.321928
YDR260C	SWM1		DMA	1.5	1.1	1.3	0.282843	0.378512
YDR261C	EXG2		DMA	1.2	1.2	1.2	0	0.263034
YDR262W	YDR262W		DMA	1.2	1.1	1.15	0.0707107	0.201634
YDR263C	DIN7		DMA	1.2	1.1	1.15	0.0707107	0.201634
YDR265W	PEX10		DMA	1.2	1.2	1.2	0	0.263034
YDR266C	HEL2		DMA	2	1.5	1.75	0.353553	0.807355
YDR269C	YDR269C		DMA	1.1	1	1.05	0.0707107	0.0703893
YDR270W	CCC2		DMA	2	2.5	2.25	0.353553	1.16993
YDR271C	YDR271C		DMA	1	1.2	1.1	0.141421	0.137504
YDR272W	GLO2		DMA	1.3	1.5	1.4	0.141421	0.485427
YDR273W	DON1		DMA	1.2	1.3	1.25	0.0707107	0.321928
YDR274C	YDR274C		DMA	1	1.1	1.05	0.0707107	0.0703893
YDR275W	BSC2		DMA	1.2	1	1.1	0.141421	0.137504
YDR276C	PMP3		DMA	1	0.8	0.9	0.141421	-0.152003
YDR277C	MTH1		DMA	1.2	1.2	1.2	0	0.263034
YDR278C	YDR278C		DMA	0.8	0.9	0.85	0.0707107	-0.234465
YDR279W	RNH202		DMA	1.1	1.2	1.15	0.0707107	0.201634
YDR280W	RRP45	rrp45-ph	TSv6	1.46392	3.19508	2.3295	1.22412	1.22002
YDR281C	PHM6		DMA	1.5	1.6	1.55	0.0707107	0.632268
YDR282C	MRX10		DMA	1.2	1.2	1.2	0	0.263034
YDR284C	DPP1		DMA	1.8	1.3	1.55	0.353553	0.632268
YDR285W	ZIP1		DMA	1.5	1.7	1.6	0.141421	0.678072
YDR286C	YDR286C		DMA	1	1.1	1.05	0.0707107	0.0703893
YDR287W	INM2		DMA	1.1	1.2	1.15	0.0707107	0.201634
YDR288W	NSE3	nse3-ts3	TSv6	0.930444	1.12689	1.02867	0.13891	0.0407777	1
YDR288W	NSE3	nse3-ph	TSv6	1.1944	0.971577	1.08299	0.157558	0.115015
YDR288W	NSE3	nse3-ts4	TSv6	1.24317	1.25777	1.25047	0.0103213	0.322472
YDR289C	RTT103		DMA	0.8	0.9	0.85	0.0707107	-0.234465
YDR290W	YDR290W		DMA	1	1	1	0	0
YDR291W	HRQ1		DMA	1.3	1.1	1.2	0.141421	0.263034		1
YDR292C	SRP101	srp101-47	TSv6	1.32094	1.46343	1.39218	0.100754	0.477347
YDR293C	SSD1		DMA	1.7	3.6	2.65	1.3435	1.40599
YDR294C	DPL1		DMA	1.2	0.9	1.05	0.212132	0.0703893
YDR297W	SUR2		DMA	1.1	1.1	1.1	0	0.137504
YDR299W	BFR2	bfr2-ph	TSv6	0.308425	0.362699	0.335562	0.0383771	-1.57535
YDR302W	GPI11	gpi11-ph	TSv6	1.21173	1.1248	1.16826	0.0614705	0.224367	1
YDR303C	RSC3	rsc3-1	TSv6	1.67069	1.89695	1.78382	0.159992	0.834972
YDR304C	CPR5		DMA	1.1	1.2	1.15	0.0707107	0.201634
YDR305C	HNT2		DMA	1.2	1.3	1.25	0.0707107	0.321928
YDR306C	YDR306C		DMA	1	1.2	1.1	0.141421	0.137504
YDR307W	PMT7		DMA	1.2	0.9	1.05	0.212132	0.0703893
YDR309C	GIC2		DMA	1.1	1	1.05	0.0707107	0.0703893
YDR310C	SUM1		DMA	1.1	1	1.05	0.0707107	0.0703893
YDR311W	TFB1	tfb1-6	TSv6	0.727391	0.629978	0.678685	0.0688816	-0.559186	1
YDR311W	TFB1	tfb1-1	TSv6	1.08269	1.22791	1.1553	0.102684	0.208271
YDR312W	SSF2		DMA	1.1	1	1.05	0.0707107	0.0703893
YDR313C	PIB1		DMA	1.3	1	1.15	0.212132	0.201634
YDR314C	RAD34		DMA	1.1	1.2	1.15	0.0707107	0.201634
YDR315C	IPK1		DMA	0.8	0.7	0.75	0.0707107	-0.415037
YDR316W	OMS1		DMA	1.1	1	1.05	0.0707107	0.0703893
YDR317W	HIM1		DMA	1.1	1	1.05	0.0707107	0.0703893
YDR318W	MCM21		DMA	1	0.8	0.9	0.141421	-0.152003
YDR319C	YFT2		DMA	0.9	1	0.95	0.0707107	-0.0740006
YDR320C	SWA2		DMA	1.1	0.8	0.95	0.212132	-0.0740006
YDR321W	ASP1		DMA	1.4	1.8	1.6	0.282843	0.678072
YDR325W	YCG1	ycg1-2	TSv6	1.67627	1.5623	1.61929	0.0805893	0.695358
YDR326C	YSP2		DMA	1.3	1.2	1.25	0.0707107	0.321928
YDR328C	SKP1	skp1-3	TSv6	1.01642	0.983939	1.00018	0.0229654	0.000256133
YDR329C	PEX3		DMA	1.1	0.9	1	0.141421	0
YDR330W	UBX5		DMA	1.5	1.1	1.3	0.282843	0.378512
YDR331W	GPI8	ydr331w-ph	TSv6	0.463953	0.882632	0.673292	0.296051	-0.570695
YDR331W	GPI8	gpi8-ts	TSv6	0.735382	0.764132	0.749757	0.020329	-0.415505
YDR332W	IRC3		DMA	1.2	1.2	1.2	0	0.263034
YDR333C	RQC1		DMA	1.2	1.1	1.15	0.0707107	0.201634
YDR334W	SWR1		DMA	0.6	0.6	0.6	0	-0.736966
YDR335W	MSN5		DMA	0.7	0.7	0.7	0	-0.514573
YDR336W	MRX8		DMA	0.8	1.2	1	0.282843	0
YDR338C	YDR338C		DMA	0.8	1.3	1.05	0.353553	0.0703893
YDR339C	FCF1	fcf1-ph	TSv6	0.899854	1.19793	1.04889	0.210769	0.0688633
YDR340W	YDR340W		DMA	1.4	1	1.2	0.282843	0.263034
YDR341C	YDR341C	ydr341c-ph	TSv6	1.44803	1.44803	1.44803	1.17664e-10	0.534094
YDR344C	YDR344C		DMA	1.1	1	1.05	0.0707107	0.0703893
YDR345C	HXT3		DMA	1.8	1.3	1.55	0.353553	0.632268
YDR346C	SVF1		DMA	1	1	1	0	0
YDR348C	PAL1		DMA	1.2	0.8	1	0.282843	0
YDR349C	YPS7		DMA	1.7	1.2	1.45	0.353553	0.536053
YDR351W	SBE2		DMA	1.5	1	1.25	0.353553	0.321928
YDR352W	YPQ2		DMA	1.1	0.9	1	0.141421	0
YDR354W	TRP4		DMA	1.3	1.1	1.2	0.141421	0.263034
YDR356W	SPC110	spc110-220	TSv6	0.50781	0.515105	0.511458	0.00515838	-0.967313	1
YDR356W	SPC110	spc110-221	TSv6	1.10142	1.16221	1.13181	0.0429853	0.178633
YDR357C	CNL1		DMA	1.2	1.3	1.25	0.0707107	0.321928
YDR358W	GGA1		DMA	1.2	2.2	1.7	0.707107	0.765535
YDR359C	EAF1		DMA	0.4	0.4	0.4	0	-1.32193
YDR360W	OPI7		DMA	0.9	0.9	0.9	0	-0.152003
YDR361C	BCP1	bcp1-ts	TSv6	1.02466	0.875531	0.950097	0.105452	-0.0738529
YDR362C	TFC6	tfc6-m1	TSv6	2.09584	1.67062	1.88323	0.300678	0.913207
YDR363W	ESC2		DMA	0.9	1.1	1	0.141421	0
YDR363W-A	SEM1		DMA	0.4	1.1	0.75	0.494975	-0.415037
YDR364C	CDC40	cdc40-ts	TSv6	0.699802	0.618064	0.658933	0.0577974	-0.601797
YDR368W	YPR1		DMA	1.3	1.2	1.25	0.0707107	0.321928
YDR369C	XRS2		DMA	1.2	1.4	1.3	0.141421	0.378512
YDR370C	DXO1		DMA	1.2	1	1.1	0.141421	0.137504
YDR371W	CTS2		DMA	1.1	1	1.05	0.0707107	0.0703893
YDR372C	VPS74		DMA	1.1	1.1	1.1	0	0.137504
YDR373W	FRQ1	frq1-1	TSv6	1.54499	1.6203	1.58265	0.0532514	0.66234
YDR374C	PHO92		DMA	1.1	1	1.05	0.0707107	0.0703893
YDR375C	BCS1		DMA	0.6	0.6	0.6	0	-0.736966
YDR378C	LSM6		DMA	0.5	0.4	0.45	0.0707107	-1.152
YDR379W	RGA2		DMA	1.2	1.3	1.25	0.0707107	0.321928
YDR380W	ARO10		DMA	1.3	1.3	1.3	0	0.378512
YDR382W	RPP2B		DMA	1.3	1.3	1.3	0	0.378512
YDR383C	NKP1		DMA	0.9	0.8	0.85	0.0707107	-0.234465
YDR384C	ATO3		DMA	1.3	1	1.15	0.212132	0.201634
YDR385W	EFT2		DMA	0.9	0.9	0.9	0	-0.152003
YDR386W	MUS81		DMA	1.1	0.9	1	0.141421	0
YDR387C	YDR387C		DMA	1.3	1.3	1.3	0	0.378512
YDR388W	RVS167		DMA	0.7	0.7	0.7	0	-0.514573
YDR389W	SAC7		DMA	0.9	0.9	0.9	0	-0.152003
YDR391C	YDR391C		DMA	0.8	1.1	0.95	0.212132	-0.0740006
YDR392W	SPT3		DMA	0.7	0.7	0.7	0	-0.514573		1
YDR393W	SHE9		DMA	0.7	0.7	0.7	0	-0.514573
YDR394W	RPT3	rpt3-1	TSv6	1.75613	1.41086	1.5835	0.244142	0.663112
YDR395W	SXM1		DMA	1.1	1.2	1.15	0.0707107	0.201634		1
YDR398W	UTP5	ydr398w-ph	TSv6	1.00322	0.997951	1.00058	0.00372269	0.00084179
YDR399W	HPT1		DMA	1.1	1	1.05	0.0707107	0.0703893
YDR400W	URH1		DMA	1	1	1	0	0
YDR401W	YDR401W		DMA	1.3	1.2	1.25	0.0707107	0.321928
YDR402C	DIT2		DMA	1.2	1.7	1.45	0.353553	0.536053
YDR403W	DIT1		DMA	1.3	1	1.15	0.212132	0.201634
YDR404C	RPB7	ydr404c-ph	TSv6	0.674378	0.453006	0.563692	0.156533	-0.827021
YDR406W	PDR15		DMA	1.4	1.6	1.5	0.141421	0.584963
YDR408C	ADE8		DMA	1.3	2	1.65	0.494975	0.722466
YDR409W	SIZ1		DMA	1.3	1.3	1.3	0	0.378512	1
YDR410C	STE14		DMA	0.2	0.2	0.2	0	-2.32193
YDR411C	DFM1		DMA	1.1	1.2	1.15	0.0707107	0.201634
YDR414C	ERD1		DMA	1	0.9	0.95	0.0707107	-0.0740006
YDR415C	YDR415C		DMA	0.7	1.1	0.9	0.282843	-0.152003
YDR416W	SYF1	ydr416w-ph	TSv6	0.583875	0.604938	0.594406	0.0148935	-0.750479
YDR419W	RAD30		DMA	1	1.2	1.1	0.141421	0.137504
YDR420W	HKR1		DMA	0.9	0.8	0.85	0.0707107	-0.234465
YDR421W	ARO80		DMA	0.9	1	0.95	0.0707107	-0.0740006
YDR422C	SIP1		DMA	1.4	1.4	1.4	0	0.485427
YDR423C	CAD1		DMA	1.3	1.1	1.2	0.141421	0.263034
YDR424C	DYN2		DMA	1	0.9	0.95	0.0707107	-0.0740006
YDR425W	SNX41		DMA	1	1.1	1.05	0.0707107	0.0703893
YDR426C	YDR426C		DMA	1	0.9	0.95	0.0707107	-0.0740006
YDR428C	BNA7		DMA	1.3	1.1	1.2	0.141421	0.263034
YDR430C	CYM1		DMA	1.1	0.9	1	0.141421	0
YDR431W	YDR431W		DMA	0.9	0.8	0.85	0.0707107	-0.234465
YDR434W	GPI17	gpi17-ph	TSv6	0.880625	0.972074	0.92635	0.0646646	-0.110371	1
YDR435C	PPM1		DMA	1.3	1.3	1.3	0	0.378512
YDR436W	PPZ2		DMA	1.2	1	1.1	0.141421	0.137504
YDR437W	GPI19	gpi19-2	TSv6	0.952942	0.79616	0.874551	0.110862	-0.193386
YDR437W	GPI19	gpi19-ph	TSv6	1.76313	1.22881	1.49597	0.37782	0.581077
YDR437W	GPI19	gpi19-2xh	TSv6	1.7641	1.73805	1.75108	0.0184217	0.808241
YDR438W	THI74		DMA	1.1	1	1.05	0.0707107	0.0703893
YDR439W	LRS4		DMA	1.4	1.2	1.3	0.141421	0.378512
YDR440W	DOT1		DMA	1.5	1.2	1.35	0.212132	0.432959
YDR441C	APT2		DMA	1	1.3	1.15	0.212132	0.201634
YDR444W	YDR444W		DMA	1.2	1.2	1.2	0	0.263034
YDR445C	YDR445C		DMA	1.3	1.1	1.2	0.141421	0.263034
YDR446W	ECM11		DMA	0.9	1.1	1	0.141421	0
YDR447C	RPS17B		DMA	0.9	1	0.95	0.0707107	-0.0740006
YDR449C	UTP6	ydr449c-ph	TSv6	1.25226	1.23439	1.24332	0.0126369	0.314201	1
YDR451C	YHP1		DMA	1.2	0.8	1	0.282843	0
YDR452W	PPN1		DMA	0.9	1.2	1.05	0.212132	0.0703893
YDR453C	TSA2		DMA	1	1.1	1.05	0.0707107	0.0703893
YDR454C	GUK1	guk1-ph	TSv6	0.98935	1.14271	1.06603	0.108439	0.0922446	1
YDR455C	YDR455C		DMA	0.9	1	0.95	0.0707107	-0.0740006
YDR458C	HEH2		DMA	1	1.2	1.1	0.141421	0.137504
YDR459C	PFA5		DMA	1.1	1.1	1.1	0	0.137504
YDR460W	TFB3	tfb3-ts	TSv6	0.415841	0.576254	0.496047	0.113429	-1.01145
YDR461W	MFA1		DMA	0.9	1.1	1	0.141421	0
YDR463W	STP1		DMA	1.1	1	1.05	0.0707107	0.0703893
YDR465C	RMT2		DMA	1	1.1	1.05	0.0707107	0.0703893
YDR466W	PKH3		DMA	1	1.2	1.1	0.141421	0.137504
YDR467C	YDR467C		DMA	1.8	1.2	1.5	0.424264	0.584963
YDR469W	SDC1		DMA	1	0.3	0.65	0.494975	-0.621488
YDR471W	RPL27B		DMA	0.8	0.9	0.85	0.0707107	-0.234465
YDR473C	PRP3	prp3-1	TSv6	1.69056	1.55492	1.62274	0.0959104	0.69843
YDR474C	YDR474C		DMA	1.2	1.2	1.2	0	0.263034
YDR475C	JIP4		DMA	1.1	1	1.05	0.0707107	0.0703893
YDR476C	YDR476C		DMA	1	1.1	1.05	0.0707107	0.0703893
YDR477W	SNF1		DMA	0.9	0.9	0.9	0	-0.152003		1
YDR478W	SNM1	snm1-ph	TSv6	0.22782	0.239287	0.233553	0.0081085	-2.09818
YDR478W	SNM1	snm1-172	TSv6	1.17487	0.14002	0.657446	0.73175	-0.605056
YDR479C	PEX29		DMA	1	1	1	0	0
YDR480W	DIG2		DMA	1.1	2.2	1.65	0.777817	0.722466
YDR481C	PHO8		DMA	1.2	1.4	1.3	0.141421	0.378512
YDR482C	CWC21		DMA	1.5	1.2	1.35	0.212132	0.432959
YDR483W	KRE2		DMA	1	1	1	0	0
YDR483W	KRE2		DMA	1.8	1.3	1.55	0.353553	0.632268
YDR485C	VPS72		DMA	0.9	0.9	0.9	0	-0.152003
YDR486C	VPS60		DMA	1	1.6	1.3	0.424264	0.378512
YDR488C	PAC11		DMA	0.9	1	0.95	0.0707107	-0.0740006
YDR489W	SLD5	sld5-ph	TSv6	1.13814	1.00226	1.0702	0.0960875	0.0978814
YDR490C	PKH1		DMA	1.7	1.5	1.6	0.141421	0.678072
YDR491C	YDR491C		DMA	1.2	1	1.1	0.141421	0.137504
YDR492W	IZH1		DMA	1.4	0.6	1	0.565685	0
YDR493W	MZM1		DMA	1.1	1	1.05	0.0707107	0.0703893
YDR494W	RSM28		DMA	1.3	1.2	1.25	0.0707107	0.321928
YDR496C	PUF6		DMA	0.7	0.8	0.75	0.0707107	-0.415037
YDR497C	ITR1		DMA	1.3	1.1	1.2	0.141421	0.263034
YDR498C	SEC20	sec20-1	TSv6	1.04826	1.08107	1.06466	0.0231995	0.0903942
YDR500C	RPL37B		DMA	0.1	0.2	0.15	0.0707107	-2.73697
YDR501W	PLM2		DMA	2.3	1.6	1.95	0.494975	0.963474
YDR502C	SAM2		DMA	0.9	1.2	1.05	0.212132	0.0703893
YDR503C	LPP1		DMA	1.8	1.5	1.65	0.212132	0.722466
YDR504C	SPG3		DMA	1.3	1.3	1.3	0	0.378512
YDR505C	PSP1		DMA	0.9	0.9	0.9	0	-0.152003
YDR506C	GMC1		DMA	1.1	1.1	1.1	0	0.137504
YDR508C	GNP1		DMA	1	1.1	1.05	0.0707107	0.0703893
YDR509W	YDR509W		DMA	1	1.2	1.1	0.141421	0.137504
YDR510W	SMT3	smt3-331	TSv6	1.20184	1.12128	1.16156	0.0569628	0.216064
YDR511W	SDH7		DMA	1.3	1	1.15	0.212132	0.201634
YDR512C	EMI1		DMA	0.8	0.8	0.8	0	-0.321928		1
YDR513W	GRX2		DMA	1.3	1.1	1.2	0.141421	0.263034
YDR514C	YDR514C		DMA	0.8	0.3	0.55	0.353553	-0.862496
YDR515W	SLF1		DMA	1	0.9	0.95	0.0707107	-0.0740006
YDR516C	EMI2		DMA	1.3	1.8	1.55	0.353553	0.632268
YDR517W	GRH1		DMA	1.5	1.4	1.45	0.0707107	0.536053
YDR519W	FPR2		DMA	1.1	1.2	1.15	0.0707107	0.201634
YDR520C	URC2		DMA	1.2	1.2	1.2	0	0.263034
YDR522C	SPS2		DMA	1.1	1.1	1.1	0	0.137504
YDR524C	AGE1		DMA	1.3	1.2	1.25	0.0707107	0.321928
YDR525W	API2		DMA	0.9	1	0.95	0.0707107	-0.0740006
YDR525W-A	SNA2		DMA	1.1	0.9	1	0.141421	0
YDR527W	RBA50	rba50-ph	TSv6	1.31114	1.14726	1.2292	0.115882	0.297719
YDR528W	HLR1		DMA	1.3	1.1	1.2	0.141421	0.263034
YDR530C	APA2		DMA	1.2	1.2	1.2	0	0.263034
YDR531W	CAB1	cab1-ph	TSv6	0.955409	0.367209	0.661309	0.41592	-0.596604	1
YDR532C	KRE28		DMA	0.3	0.4	0.35	0.0707107	-1.51457
YDR533C	HSP31		DMA	1.1	1.1	1.1	0	0.137504
YDR534C	FIT1		DMA	1.1	1.4	1.25	0.212132	0.321928
YDR535C	YDR535C		DMA	1.1	1.2	1.15	0.0707107	0.201634
YDR536W	STL1		DMA	1.1	1.1	1.1	0	0.137504
YDR537C	YDR537C		DMA	0.9	0.9	0.9	0	-0.152003
YDR538W	PAD1		DMA	0.7	0.9	0.8	0.141421	-0.321928
YDR539W	FDC1		DMA	0.9	0.9	0.9	0	-0.152003
YDR540C	IRC4		DMA	1.2	1.1	1.15	0.0707107	0.201634
YDR541C	YDR541C		DMA	1	0.9	0.95	0.0707107	-0.0740006	1
YER041W	YEN1		DMA	1	1.2	1.1	0.141421	0.137504
YER042W	MXR1		DMA	1.1	0.9	1	0.141421	0
YER044C-A	MEI4		DMA	1.2	1	1.1	0.141421	0.137504
YER045C	ACA1		DMA	1.2	1	1.1	0.141421	0.137504	1
YER046W	SPO73		DMA	1.3	1.1	1.2	0.141421	0.263034
YER046W-A	YER046W-A		DMA	1.1	1.2	1.15	0.0707107	0.201634
YER047C	SAP1		DMA	1.3	1.6	1.45	0.212132	0.536053
YER048C	CAJ1		DMA	1.1	1	1.05	0.0707107	0.0703893
YER049W	TPA1		DMA	1.3	1.2	1.25	0.0707107	0.321928
YER051W	JHD1		DMA	1.3	1.1	1.2	0.141421	0.263034
YER052C	HOM3		DMA	0.7	0.8	0.75	0.0707107	-0.415037
YER053C	PIC2		DMA	1.1	1.1	1.1	0	0.137504
YER054C	GIP2		DMA	1.2	0.9	1.05	0.212132	0.0703893
YER055C	HIS1		DMA	0.3	0.3	0.3	0	-1.73697
YER056C	FCY2		DMA	0.8	1	0.9	0.141421	-0.152003
YER056C-A	RPL34A		DMA	0.8	0.9	0.85	0.0707107	-0.234465
YER057C	HMF1		DMA	1.4	1.3	1.35	0.0707107	0.432959
YER059W	PCL6		DMA	1.2	1.7	1.45	0.353553	0.536053
YER060W	FCY21		DMA	1.1	1.2	1.15	0.0707107	0.201634
YER060W-A	FCY22		DMA	1	1.4	1.2	0.282843	0.263034
YER061C	CEM1		DMA	0.7	0.6	0.65	0.0707107	-0.621488
YER062C	GPP2		DMA	1.2	1.3	1.25	0.0707107	0.321928
YER063W	THO1		DMA	1	1.1	1.05	0.0707107	0.0703893
YER064C	VHR2		DMA	1.1	1.1	1.1	0	0.137504
YER065C	ICL1		DMA	0.9	0.8	0.85	0.0707107	-0.234465
YER066C-A	YER066C-A		DMA	1.2	1.3	1.25	0.0707107	0.321928
YER066W	RRT13		DMA	1.1	1	1.05	0.0707107	0.0703893
YER067C-A	YER067C-A		DMA	1.1	1.4	1.25	0.212132	0.321928
YER067W	RGI1		DMA	1.2	1	1.1	0.141421	0.137504
YER069W	ARG5,6		DMA	0.3	0.3	0.3	0	-1.73697		1
YER071C	TDA2		DMA	1	1.1	1.05	0.0707107	0.0703893
YER072W	VTC1		DMA	1	1.3	1.15	0.212132	0.201634
YER073W	ALD5		DMA	1.5	1.2	1.35	0.212132	0.432959
YER074W	RPS24A		DMA	0.5	0.6	0.55	0.0707107	-0.862496
YER075C	PTP3		DMA	1.1	0.9	1	0.141421	0
YER077C	MRX1		DMA	1	1.2	1.1	0.141421	0.137504
YER078C	ICP55		DMA	1.1	1.1	1.1	0	0.137504
YER079W	YER079W		DMA	1.1	1.2	1.15	0.0707107	0.201634
YER080W	AIM9		DMA	1	1.4	1.2	0.282843	0.263034
YER081W	SER3		DMA	1	1	1	0	0
YER083C	GET2		DMA	0.9	1	0.95	0.0707107	-0.0740006
YER084W	YER084W		DMA	2.1	2.8	2.45	0.494975	1.29278
YER085C	YER085C		DMA	1.2	1.3	1.25	0.0707107	0.321928
YER087C-A	YER087C-A		DMA	1.4	1	1.2	0.282843	0.263034
YER088C	DOT6		DMA	1	1.3	1.15	0.212132	0.201634
YER089C	PTC2		DMA	1.1	1	1.05	0.0707107	0.0703893
YER090W	TRP2		DMA	1.4	1.2	1.3	0.141421	0.378512	1
YER091C	MET6		DMA	1.3	1.3	1.3	0	0.378512
YER091C-A	YER091C-A		DMA	1.4	1.1	1.25	0.212132	0.321928
YER092W	IES5		DMA	0.9	0.8	0.85	0.0707107	-0.234465
YER093C	TSC11	tsc11-1	TSv6	1.16187	1.25029	1.20608	0.0625243	0.270325
YER093C	TSC11	tsc11-5	TSv6	1.41966	1.43932	1.42949	0.0139024	0.515497
YER093C	TSC11	tsc11-7	TSv6	1.52433	2.72906	2.1267	0.851874	1.08861
YER093C-A	AIM11		DMA	0.8	0.8	0.8	0	-0.321928		1
YER094C	PUP3	pup3-ph	TSv6	1.24254	1.16714	1.20484	0.0533217	0.268842	1
YER095W	RAD51		DMA	1.2	1.3	1.25	0.0707107	0.321928
YER096W	SHC1		DMA	1.1	1.1	1.1	0	0.137504
YER097W	YER097W		DMA	1.7	1.9	1.8	0.141421	0.847997
YER098W	UBP9		DMA	1.3	1.3	1.3	0	0.378512
YER101C	AST2		DMA	1	1.1	1.05	0.0707107	0.0703893
YER106W	MAM1		DMA	1.1	1	1.05	0.0707107	0.0703893
YER108C	YER108C		DMA	1.2	1.4	1.3	0.141421	0.378512
YER109C	FLO8		DMA	0.9	1	0.95	0.0707107	-0.0740006
YER111C	SWI4		DMA	1.3	0.9	1.1	0.282843	0.137504
YER113C	TMN3		DMA	1.2	1.1	1.15	0.0707107	0.201634
YER114C	BOI2		DMA	1.5	1.1	1.3	0.282843	0.378512
YER115C	SPR6		DMA	1.5	1.7	1.6	0.141421	0.678072
YER116C	SLX8		DMA	0.4	0.4	0.4	0	-1.32193
YER116C	SLX8	slx8-supp1	TSv6	0.621117	0.796928	0.709023	0.124317	-0.496096
YER117W	RPL23B		DMA	1.3	1.7	1.5	0.282843	0.584963
YER118C	SHO1		DMA	1.2	1.6	1.4	0.282843	0.485427
YER119C	AVT6		DMA	1.1	1.1	1.1	0	0.137504
YER119C-A	YER119C-A		DMA	0.8	0.7	0.75	0.0707107	-0.415037
YER120W	SCS2		DMA	0.7	0.8	0.75	0.0707107	-0.415037
YER121W	YER121W		DMA	1.2	1.3	1.25	0.0707107	0.321928
YER123W	YCK3		DMA	0.9	0.8	0.85	0.0707107	-0.234465
YER124C	DSE1		DMA	1	0.8	0.9	0.141421	-0.152003
YER125W	RSP5	rsp5-sm1	TSv6	0.70807	0.722518	0.715294	0.0102164	-0.483392	1
YER125W	RSP5	rsp5-1	TSv6	1.0443	0.84246	0.94338	0.142722	-0.0840887	1
YER125W	RSP5	rsp5-3	TSv6	1.56721	1.3599	1.46355	0.146588	0.549476
YER128W	VFA1		DMA	1.4	1.2	1.3	0.141421	0.378512
YER129W	SAK1		DMA	1.4	1.3	1.35	0.0707107	0.432959
YER130C	COM2		DMA	1.1	1.1	1.1	0	0.137504
YER131W	RPS26B		DMA	0.9	0.8	0.85	0.0707107	-0.234465
YER132C	PMD1		DMA	1	1	1	0	0
YER133W	GLC7	glc7-10	TSv6	0.832434	0.730715	0.781575	0.0719263	-0.355545
YER133W	GLC7	glc7-12	TSv6	1.1428	1.07036	1.10658	0.0512282	0.146109
YER134C	YER134C		DMA	1	1	1	0	0
YER135C	YER135C		DMA	0.6	0.7	0.65	0.0707107	-0.621488	1
YER136W	GDI1	gdi1-1	TSv6	1.26764	1.41153	1.33958	0.101745	0.421782
YER137C	YER137C		DMA	1.2	1	1.1	0.141421	0.137504
YER139C	RTR1		DMA	0.9	1	0.95	0.0707107	-0.0740006
YER140W	EMP65		DMA	1.1	0.9	1	0.141421	0
YER142C	MAG1		DMA	1.3	1	1.15	0.212132	0.201634
YER143W	DDI1		DMA	1.2	0.8	1	0.282843	0
YER144C	UBP5		DMA	1.2	1.2	1.2	0	0.263034
YER145C	FTR1		DMA	1.1	1.3	1.2	0.141421	0.263034
YER147C	SCC4	yer147c-ph	TSv6	1.17663	1.52749	1.35206	0.248098	0.435159
YER147C	SCC4	scc4-4	TSv6	1.40091	1.54999	1.47545	0.105418	0.561155
YER148W	SPT15	spt15-i143n	TSv6	0.666613	0.664574	0.665593	0.00144138	-0.587287
YER148W	SPT15	spt15-p65s	TSv6	1.09016	1.24544	1.1678	0.109795	0.223791
YER149C	PEA2		DMA	0.9	1.2	1.05	0.212132	0.0703893
YER150W	SPI1		DMA	1	0.9	0.95	0.0707107	-0.0740006
YER151C	UBP3		DMA	0.6	0.5	0.55	0.0707107	-0.862496
YER152C	YER152C		DMA	1.1	1	1.05	0.0707107	0.0703893
YER153C	PET122		DMA	0.8	0.5	0.65	0.212132	-0.621488
YER155C	BEM2		DMA	0.8	0.7	0.75	0.0707107	-0.415037
YER156C	YER156C		DMA	1.1	0.9	1	0.141421	0
YER157W	COG3	cog3-1	TSv6	1.01397	1.04304	1.0285	0.0205496	0.040548
YER157W	COG3	cog3-2	TSv6	1.54308	1.62954	1.58631	0.0611404	0.665676
YER158C	YER158C		DMA	1.3	1.3	1.3	0	0.378512
YER161C	SPT2		DMA	1	0.9	0.95	0.0707107	-0.0740006
YER162C	RAD4		DMA	0.7	0.7	0.7	0	-0.514573
YER163C	GCG1		DMA	1.1	1.1	1.1	0	0.137504
YER164W	CHD1		DMA	1.4	1	1.2	0.282843	0.263034
YER166W	DNF1		DMA	1.2	0.9	1.05	0.212132	0.0703893
YER167W	BCK2		DMA	1	1.1	1.05	0.0707107	0.0703893
YER168C	CCA1	cca1-1	TSv6	0.173873	0.179246	0.176559	0.00379958	-2.50178
YER168C	CCA1	cca1-ph	TSv6	1.01432	1.16735	1.09084	0.108209	0.125439
YER170W	ADK2		DMA	1	0.7	0.85	0.212132	-0.234465
YER171W	RAD3	rad3-ts14	TSv6	0.623462	0.72118	0.672321	0.069097	-0.572777
YER173W	RAD24		DMA	1.1	1.1	1.1	0	0.137504
YER174C	GRX4		DMA	1	1	1	0	0
YER175C	TMT1		DMA	1.1	1	1.05	0.0707107	0.0703893
YER176W	ECM32		DMA	1.2	1	1.1	0.141421	0.137504
YER177W	BMH1		DMA	0.9	1.3	1.1	0.282843	0.137504
YER178W	PDA1		DMA	0.8	1	0.9	0.141421	-0.152003
YER179W	DMC1		DMA	1.3	1.2	1.25	0.0707107	0.321928
YER180C	ISC10		DMA	1	1	1	0	0
YER181C	YER181C		DMA	2.6	1.1	1.85	1.06066	0.887525
YER182W	FMP10		DMA	1	1	1	0	0
YER183C	FAU1		DMA	1.6	1.1	1.35	0.353553	0.432959
YER184C	TOG1		DMA	1.3	1.3	1.3	0	0.378512
YER185W	PUG1		DMA	1.4	1.1	1.25	0.212132	0.321928
YER186C	YER186C		DMA	1.3	1.2	1.25	0.0707107	0.321928
YER187W	YER187W		DMA	1.3	1.2	1.25	0.0707107	0.321928
YER188W	YER188W		DMA	1	1.4	1.2	0.282843	0.263034
YFL001W	DEG1		DMA	0.6	0.6	0.6	0	-0.736966
YFL003C	MSH4		DMA	1.1	1.9	1.5	0.565685	0.584963
YFL004W	VTC2		DMA	1.6	1.1	1.35	0.353553	0.432959
YFL005W	SEC4	sec4-8	TSv6	1.07114	0.993058	1.0321	0.0552159	0.0455844
YFL006W	YFL006W		DMA	1.2	1.6	1.4	0.282843	0.485427
YFL007W	BLM10		DMA	1.1	1.1	1.1	0	0.137504
YFL008W	SMC1	smc1-2	TSv6	1.18322	1.17663	1.17992	0.00465915	0.238693
YFL008W	SMC1	smc1-259	TSv6	1.2844	1.2983	1.29135	0.00983301	0.368878
YFL009W	CDC4	cdc4-2	TSv6	0.172867	0.169558	0.171213	0.00234005	-2.54614
YFL009W	CDC4	cdc4-1	TSv6	1.36572	1.23242	1.29907	0.0942576	0.377476
YFL009W	CDC4	cdc4-3	TSv6	1.51628	1.33903	1.42765	0.125335	0.513644
YFL010C	WWM1		DMA	0.9	1	0.95	0.0707107	-0.0740006
YFL010W-A	AUA1		DMA	1.3	1.6	1.45	0.212132	0.536053
YFL011W	HXT10		DMA	1.1	1.4	1.25	0.212132	0.321928
YFL012W	YFL012W		DMA	1.1	1.1	1.1	0	0.137504
YFL013C	IES1		DMA	0.9	0.8	0.85	0.0707107	-0.234465
YFL013W-A	YFL013W-A		DMA	0.8	0.8	0.8	0	-0.321928
YFL014W	HSP12		DMA	0.7	1.4	1.05	0.494975	0.0703893
YFL015C	YFL015C		DMA	1.2	1.2	1.2	0	0.263034
YFL017C	GNA1	gna1-ts	TSv6	1.14083	0.916579	1.02871	0.158571	0.0408297
YFL017C	GNA1	yfl017c-ph	TSv6	1.33296	1.30233	1.31764	0.021655	0.397962
YFL018C	LPD1		DMA	1.1	0.5	0.8	0.424264	-0.321928
YFL019C	YFL019C		DMA	1.3	1.4	1.35	0.0707107	0.432959
YFL020C	PAU5		DMA	1.1	1.3	1.2	0.141421	0.263034
YFL021W	GAT1		DMA	1.3	1.3	1.3	0	0.378512
YFL022C	FRS2	frs2-ph	TSv6	0.177075	0.211979	0.194527	0.0246814	-2.36196
YFL023W	BUD27		DMA	0.7	0.7	0.7	0	-0.514573
YFL025C	BST1		DMA	1.3	1.2	1.25	0.0707107	0.321928
YFL026W	STE2		DMA	0.1	0.2	0.15	0.0707107	-2.73697
YFL027C	GYP8		DMA	1.4	1.4	1.4	0	0.485427
YFL028C	CAF16		DMA	1.4	3.2	2.3	1.27279	1.20163
YFL029C	CAK1	cak1-23	TSv6	1.23371	1.19546	1.21459	0.027046	0.280464
YFL030W	AGX1		DMA	0.9	1.5	1.2	0.424264	0.263034
YFL031W	HAC1		DMA	1.1	1.4	1.25	0.212132	0.321928
YFL032W	YFL032W		DMA	1.4	1.2	1.3	0.141421	0.378512
YFL033C	RIM15		DMA	1.3	1.2	1.25	0.0707107	0.321928
YFL034C-A	RPL22B		DMA	1.1	1.2	1.15	0.0707107	0.201634
YFL034C-A	RPL22B		DMA	1.9	1.3	1.6	0.424264	0.678072
YFL034C-B	MOB2	mob2-26	TSv6	0.681187	0.778917	0.730052	0.0691056	-0.453929	1
YFL034C-B	MOB2	mob2-38	TSv6	1.07304	1.17453	1.12378	0.0717675	0.168364	1
YFL034C-B	MOB2	mob2-11	TSv6	1.09679	1.28387	1.19033	0.132285	0.251364
YFL034C-B	MOB2	mob2-36	TSv6	1.15913	1.30127	1.2302	0.100512	0.298894
YFL034C-B	MOB2	mob2-20	TSv6	1.39139	1.12097	1.25618	0.191212	0.329045
YFL034C-B	MOB2	mob2-24	TSv6	1.38829	1.40302	1.39566	0.010412	0.480944
YFL034C-B	MOB2	mob2-40	TSv6	1.34414	1.47145	1.40779	0.0900181	0.493436
YFL034C-B	MOB2	mob2-34	TSv6	1.58208	1.45846	1.52027	0.0874073	0.604327
YFL034C-B	MOB2	mob2-19	TSv6	1.53469	1.65791	1.5963	0.0871279	0.674733	1
YFL034C-B	MOB2	mob2-28	TSv6	1.92758	1.34676	1.63717	0.410707	0.711205
YFL034C-B	MOB2	mob2-8	TSv6	1.84533	1.85665	1.85099	0.00800451	0.888298
YFL034C-B	MOB2	mob2-22	TSv6	1.88392	1.8506	1.86726	0.0235595	0.900924	1
YFL034C-B	MOB2	mob2-14	TSv6	2.18886	1.91056	2.04971	0.196787	1.03542
YFL034W	MIL1		DMA	1.3	1.4	1.35	0.0707107	0.432959
YFL036W	RPO41		DMA	0.5	0.4	0.45	0.0707107	-1.152
YFL037W	TUB2	tub2-443	TSv6	1.50606	1.60764	1.55685	0.071828	0.638632
YFL038C	YPT1	ypt1-3	TSv6	1.46996	1.59444	1.5322	0.0880176	0.615603
YFL039C	ACT1	act1-112	TSv6	0.667616	0.623807	0.645712	0.0309777	-0.631038
YFL039C	ACT1	act1-120	TSv6	0.798782	0.52343	0.661106	0.194703	-0.597046
YFL039C	ACT1	act1-125	TSv6	0.772822	0.581907	0.677364	0.134997	-0.561996
YFL039C	ACT1	act1-3	TSv6	0.762171	0.666653	0.714412	0.0675417	-0.485172	1
YFL039C	ACT1	act1-159	TSv6	0.66758	0.800795	0.734187	0.094197	-0.44578
YFL039C	ACT1	act1-2	TSv6	0.725336	0.79215	0.758743	0.0472448	-0.398317	1
YFL039C	ACT1	act1-155	TSv6	0.9034	0.878423	0.890911	0.0176609	-0.166646
YFL039C	ACT1	act1-105	TSv6	0.976168	0.810999	0.893583	0.116793	-0.162326
YFL039C	ACT1	act1-108	TSv6	0.915399	0.979795	0.947597	0.0455343	-0.0776543
YFL039C	ACT1	act1-129	TSv6	0.967177	0.965543	0.96636	0.00115553	-0.0493675
YFL039C	ACT1	act1-133	TSv6	1.0035	1.00842	1.00596	0.00347704	0.00857497
YFL039C	ACT1	act1-132	TSv6	0.936743	1.18512	1.06093	0.175631	0.0853334
YFL039C	ACT1	act1-4	TSv6	1.08189	1.04154	1.06171	0.0285269	0.0863954
YFL039C	ACT1	act1-136	TSv6	1.01089	1.12258	1.06673	0.0789804	0.0932013
YFL039C	ACT1	act1-111	TSv6	0.996945	1.19728	1.09711	0.141659	0.133711
YFL039C	ACT1	act1-122	TSv6	1.22859	1.25187	1.24023	0.0164577	0.310609
YFL039C	ACT1	act1-124	TSv6	1.2603	1.3739	1.3171	0.0803283	0.397368
YFL039C	ACT1	act1-121	TSv6	1.5376	1.4961	1.51685	0.02935	0.601077
YFL039C	ACT1	act1-101	TSv6	1.68968	1.49626	1.59297	0.136768	0.671717
YFL039C	ACT1	act1-119	TSv6	1.7458	1.56007	1.65294	0.131329	0.725031
YFL040W	YFL040W		DMA	1.5	1.1	1.3	0.282843	0.378512
YFL041W	FET5		DMA	1.8	1.6	1.7	0.141421	0.765535
YFL042C	LAM5		DMA	1.9	1.7	1.8	0.141421	0.847997
YFL043C	YFL043C		DMA	1.4	1.7	1.55	0.212132	0.632268
YFL044C	OTU1		DMA	1.3	1.5	1.4	0.141421	0.485427
YFL045C	SEC53	sec53-6	TSv6	1.07963	1.07572	1.07768	0.00276691	0.107924
YFL046W	FMP32		DMA	1.2	0.9	1.05	0.212132	0.0703893
YFL047W	RGD2		DMA	1.1	1.1	1.1	0	0.137504
YFL048C	EMP47		DMA	1.2	1.3	1.25	0.0707107	0.321928
YFL049W	SWP82		DMA	1.2	1.2	1.2	0	0.263034
YFL050C	ALR2		DMA	1.2	1.2	1.2	0	0.263034
YFL051C	YFL051C		DMA	1.1	1.1	1.1	0	0.137504
YFL052W	ZNF1		DMA	1.9	1.4	1.65	0.353553	0.722466
YFL053W	DAK2		DMA	1.5	1.2	1.35	0.212132	0.432959
YFL054C	YFL054C		DMA	1.8	1.4	1.6	0.282843	0.678072
YFL055W	AGP3		DMA	1.3	1.4	1.35	0.0707107	0.432959
YFL056C	AAD6		DMA	1.3	1.3	1.3	0	0.378512
YFL063W	YFL063W		DMA	1.4	1.3	1.35	0.0707107	0.432959
YFR004W	RPN11	rpn11-8	TSv6	0.766859	0.696687	0.731773	0.0496194	-0.450531
YFR004W	RPN11	rpn11-14	TSv6	0.882126	0.956086	0.919106	0.0522975	-0.121696	1
YFR005C	SAD1	sad1-1	TSv6	0.658415	0.722725	0.69057	0.0454742	-0.534141
YFR006W	YFR006W		DMA	1.1	0.9	1	0.141421	0
YFR007W	YFH7		DMA	0.9	1.1	1	0.141421	0
YFR008W	FAR7		DMA	1	1.1	1.05	0.0707107	0.0703893
YFR009W	GCN20		DMA	1	0.8	0.9	0.141421	-0.152003
YFR010W	UBP6		DMA	0.6	0.7	0.65	0.0707107	-0.621488
YFR011C	MIC19		DMA	0.9	0.8	0.85	0.0707107	-0.234465
YFR012W	DCV1		DMA	1.1	0.8	0.95	0.212132	-0.0740006
YFR013W	IOC3		DMA	1	1	1	0	0
YFR014C	CMK1		DMA	1.3	1.3	1.3	0	0.378512
YFR015C	GSY1		DMA	1.2	1.2	1.2	0	0.263034
YFR016C	YFR016C		DMA	1.4	1.3	1.35	0.0707107	0.432959
YFR017C	IGD1		DMA	1.2	0.9	1.05	0.212132	0.0703893
YFR018C	YFR018C		DMA	1.5	1.2	1.35	0.212132	0.432959
YFR019W	FAB1		DMA	0.6	0.7	0.65	0.0707107	-0.621488
YFR020W	YFR020W		DMA	1	1	1	0	0
YFR021W	ATG18		DMA	1.1	1	1.05	0.0707107	0.0703893
YFR022W	ROG3		DMA	1.1	0.9	1	0.141421	0
YFR023W	PES4		DMA	1.4	1.1	1.25	0.212132	0.321928
YFR024C	YFR024C		DMA	1.1	1.1	1.1	0	0.137504
YFR024C-A	LSB3		DMA	1.6	1.3	1.45	0.212132	0.536053
YFR025C	HIS2		DMA	0.2	0.2	0.2	0	-2.32193
YFR026C	ULI1		DMA	1.1	1.1	1.1	0	0.137504
YFR027W	ECO1	eco1-1	TSv6	1.42565	1.44356	1.43461	0.0126701	0.520654
YFR028C	CDC14	cdc14-1	TSv6	1.31113	1.27883	1.29498	0.0228405	0.372933
YFR028C	CDC14	cdc14-2	TSv6	1.56244	1.24995	1.4062	0.220963	0.4918
YFR028C	CDC14	cdc14-3	TSv6	1.30602	1.53799	1.422	0.164026	0.507924
YFR028C	CDC14	cdc14-8	TSv6	1.38945	1.47435	1.4319	0.060033	0.51793
YFR030W	MET10		DMA	1	1	1	0	0
YFR031C	SMC2	smc2-8	TSv6	0.368201	0.355056	0.361629	0.00929465	-1.46742		1
YFR031C-A	RPL2A		DMA	0.8	1	0.9	0.141421	-0.152003
YFR032C	RRT5		DMA	1.2	0.9	1.05	0.212132	0.0703893
YFR032C-A	RPL29		DMA	0.8	0.8	0.8	0	-0.321928
YFR033C	QCR6		DMA	0.9	0.8	0.85	0.0707107	-0.234465
YFR034C	PHO4		DMA	1.2	0.9	1.05	0.212132	0.0703893
YFR035C	YFR035C		DMA	1.2	1	1.1	0.141421	0.137504
YFR036W	CDC26	cdc26-1	TSv6	1.85864	1.78306	1.82085	0.0534471	0.864613
YFR037C	RSC8	rsc8-ts21	TSv6	1.47504	1.211	1.34302	0.186702	0.425483
YFR037C	RSC8	rsc8-ts16	TSv6	1.56756	1.67758	1.62257	0.0777923	0.69828
YFR038W	IRC5		DMA	1.2	1.1	1.15	0.0707107	0.201634
YFR039C	OSW7		DMA	1.1	1.1	1.1	0	0.137504
YFR040W	SAP155		DMA	1	0.8	0.9	0.141421	-0.152003
YFR041C	ERJ5		DMA	2	0.2	1.1	1.27279	0.137504
YFR043C	IRC6		DMA	1.4	1.3	1.35	0.0707107	0.432959
YFR044C	DUG1		DMA	1.1	1	1.05	0.0707107	0.0703893
YFR045W	YFR045W		DMA	1	1.1	1.05	0.0707107	0.0703893
YFR046C	CNN1		DMA	1.2	1.4	1.3	0.141421	0.378512
YFR047C	BNA6		DMA	1.2	1.1	1.15	0.0707107	0.201634
YFR048W	RMD8		DMA	1.2	1.3	1.25	0.0707107	0.321928
YFR049W	YMR31		DMA	1.1	1.2	1.15	0.0707107	0.201634
YFR050C	PRE4	pre4-ph	TSv6	0.730691	0.70819	0.719441	0.0159103	-0.475052	1
YFR051C	RET2	ret2-1	TSv6	0.878268	1.10417	0.991219	0.159737	-0.012724
YFR052W	RPN12	rpn12-1	TSv6	0.852134	0.738631	0.795382	0.0802591	-0.33028
YFR053C	HXK1		DMA	1.9	1.1	1.5	0.565685	0.584963
YFR054C	YFR054C		DMA	1.8	1.6	1.7	0.141421	0.765535
YFR055W	IRC7		DMA	2.3	1.4	1.85	0.636396	0.887525
YFR056C	YFR056C		DMA	1.3	2	1.65	0.494975	0.722466
YFR057W	YFR057W		DMA	1.4	1.3	1.35	0.0707107	0.432959
YGL001C	ERG26	erg26-1	TSv6	1.14068	1.18052	1.1606	0.0281722	0.214873
YGL002W	ERP6		DMA	1	1.1	1.05	0.0707107	0.0703893
YGL004C	RPN14		DMA	1.2	1.1	1.15	0.0707107	0.201634
YGL005C	COG7		DMA	1.3	1.1	1.2	0.141421	0.263034
YGL006W	PMC1		DMA	1.1	1.2	1.15	0.0707107	0.201634
YGL007W	BRP1		DMA	0.7	0.8	0.75	0.0707107	-0.415037
YGL009C	LEU1		DMA	1.1	1	1.05	0.0707107	0.0703893		1
YGL010W	MPO1		DMA	1.4	1.4	1.4	0	0.485427
YGL011C	SCL1	scl1-ph	TSv6	1.26893	1.525	1.39697	0.181068	0.482297
YGL013C	PDR1		DMA	1.3	1	1.15	0.212132	0.201634
YGL014W	PUF4		DMA	1.3	1.2	1.25	0.0707107	0.321928
YGL015C	YGL015C		DMA	1.3	1.6	1.45	0.212132	0.536053
YGL016W	KAP122		DMA	1	0.9	0.95	0.0707107	-0.0740006
YGL017W	ATE1		DMA	1.1	1	1.05	0.0707107	0.0703893
YGL019W	CKB1		DMA	0.8	0.9	0.85	0.0707107	-0.234465
YGL020C	GET1		DMA	0.9	0.8	0.85	0.0707107	-0.234465
YGL021W	ALK1		DMA	1.5	1.3	1.4	0.141421	0.485427
YGL022W	STT3	stt3-1	TSv6	0.460091	0.34347	0.40178	0.0824631	-1.31552	1
YGL022W	STT3	stt3-2	TSv6	0.621943	0.660021	0.640982	0.0269251	-0.641645
YGL022W	STT3	stt3-7	TSv6	0.658415	0.803235	0.730825	0.102403	-0.452403	1
YGL023C	PIB2		DMA	1	1	1	0	0
YGL024W	YGL024W		DMA	0.4	0.4	0.4	0	-1.32193		1
YGL026C	TRP5		DMA	0.2	0.2	0.2	0	-2.32193
YGL027C	CWH41		DMA	1.2	1.7	1.45	0.353553	0.536053
YGL028C	SCW11		DMA	1.4	1.5	1.45	0.0707107	0.536053
YGL029W	CGR1		DMA	1	0.7	0.85	0.212132	-0.234465
YGL031C	RPL24A		DMA	0.6	0.8	0.7	0.141421	-0.514573
YGL032C	AGA2		DMA	1.2	1.3	1.25	0.0707107	0.321928
YGL034C	YGL034C		DMA	1.1	1	1.05	0.0707107	0.0703893
YGL035C	MIG1		DMA	1.1	1.1	1.1	0	0.137504
YGL036W	YGL036W		DMA	0.8	1	0.9	0.141421	-0.152003
YGL037C	PNC1		DMA	1.1	1	1.05	0.0707107	0.0703893
YGL039W	YGL039W		DMA	1.3	1.1	1.2	0.141421	0.263034
YGL041C	YGL041C		DMA	1.6	1.7	1.65	0.0707107	0.722466
YGL042C	YGL042C		DMA	0.9	1	0.95	0.0707107	-0.0740006
YGL043W	DST1		DMA	0.8	0.9	0.85	0.0707107	-0.234465		1
YGL044C	RNA15	rna15-58	TSv6	1.10149	1.16588	1.13368	0.0455283	0.181017
YGL045W	RIM8		DMA	0.2	0.2	0.2	0	-2.32193
YGL046W	YGL046W		DMA	0.9	1	0.95	0.0707107	-0.0740006
YGL047W	ALG13	alg13-ph	TSv6	1.893	1.55356	1.72328	0.240021	0.785154
YGL048C	RPT6	rpt6-25	TSv6	0.731355	0.708072	0.719713	0.0164636	-0.474506
YGL048C	RPT6	rpt6-1	TSv6	0.944377	0.763162	0.85377	0.128138	-0.228081	1
YGL048C	RPT6	rpt6-20	TSv6	1.22102	1.21143	1.21622	0.00678373	0.282408
YGL049C	TIF4632		DMA	1.3	1.1	1.2	0.141421	0.263034
YGL050W	TYW3		DMA	1.2	1.3	1.25	0.0707107	0.321928
YGL051W	MST27		DMA	1.1	1.2	1.15	0.0707107	0.201634
YGL053W	PRM8		DMA	1.1	1.1	1.1	0	0.137504
YGL054C	ERV14		DMA	0.9	1	0.95	0.0707107	-0.0740006	1
YGL055W	OLE1	ole1-m2	TSv6	0.908738	0.972028	0.940383	0.0447524	-0.0886793	1
YGL056C	SDS23		DMA	1.2	1.2	1.2	0	0.263034
YGL057C	GEP7		DMA	0.8	0.5	0.65	0.212132	-0.621488
YGL058W	RAD6		DMA	1.2	1.1	1.15	0.0707107	0.201634
YGL059W	PKP2		DMA	1.4	1.4	1.4	0	0.485427
YGL060W	YBP2		DMA	1.2	1.2	1.2	0	0.263034
YGL061C	DUO1	duo1-2	TSv6	1.37326	1.56244	1.46785	0.133767	0.553707
YGL062W	PYC1		DMA	1.2	1.4	1.3	0.141421	0.378512
YGL063W	PUS2		DMA	1	0.8	0.9	0.141421	-0.152003
YGL065C	ALG2	alg2-1	TSv6	1.11113	1.06697	1.08905	0.0312222	0.123069
YGL066W	SGF73		DMA	0.8	0.8	0.8	0	-0.321928		1
YGL067W	NPY1		DMA	1.2	1.2	1.2	0	0.263034
YGL071W	AFT1		DMA	1	1.2	1.1	0.141421	0.137504
YGL073W	HSF1	hsf1-848	TSv6	0.503327	0.372062	0.437695	0.0928177	-1.192
YGL075C	MPS2	mps2-2	TSv6	0.25077	0.263001	0.256885	0.00864886	-1.9608
YGL075C	MPS2	mps2-1	TSv6	0.369353	0.524049	0.446701	0.109387	-1.16262
YGL077C	HNM1		DMA	1.3	1.2	1.25	0.0707107	0.321928
YGL078C	DBP3		DMA	0.8	0.8	0.8	0	-0.321928
YGL079W	KXD1		DMA	1	1.1	1.05	0.0707107	0.0703893
YGL080W	MPC1		DMA	0.7	0.9	0.8	0.141421	-0.321928
YGL081W	YGL081W		DMA	1.1	1.1	1.1	0	0.137504
YGL082W	YGL082W		DMA	1.3	1.2	1.25	0.0707107	0.321928
YGL083W	SCY1		DMA	1.1	1	1.05	0.0707107	0.0703893
YGL084C	GUP1		DMA	0.9	1	0.95	0.0707107	-0.0740006
YGL085W	LCL3		DMA	1	1.1	1.05	0.0707107	0.0703893
YGL086W	MAD1		DMA	1.3	0.8	1.05	0.353553	0.0703893
YGL087C	MMS2		DMA	1.1	1.1	1.1	0	0.137504
YGL089C	MF(ALPHA)2		DMA	1.2	1	1.1	0.141421	0.137504
YGL090W	LIF1		DMA	1.4	1.3	1.35	0.0707107	0.432959
YGL091C	NBP35	nbp35-ph	TSv6	0.660056	0.654324	0.65719	0.00405278	-0.605617
YGL092W	NUP145	nup145-r4	TSv6	1.31016	1.06133	1.18574	0.175954	0.245792
YGL093W	SPC105	spc105-4	TSv6	1.55083	1.45596	1.5034	0.0670862	0.588225
YGL093W	SPC105	spc105-15	TSv6	1.79412	1.75713	1.77562	0.0261518	0.828326
YGL094C	PAN2		DMA	1.1	1.1	1.1	0	0.137504
YGL096W	TOS8		DMA	1	1	1	0	0
YGL097W	SRM1	srm1-g282s	TSv6	0.132728	0.136801	0.134764	0.00288039	-2.89149
YGL097W	SRM1	srm1-ts	TSv6	0.719733	0.674159	0.696946	0.0322252	-0.520881
YGL098W	USE1	use1-ts	TSv6	1.37127	1.83776	1.60452	0.32986	0.682139
YGL101W	YGL101W		DMA	1.1	1.1	1.1	0	0.137504
YGL104C	VPS73		DMA	1	1.1	1.05	0.0707107	0.0703893
YGL105W	ARC1		DMA	0.1	0.1	0.1	0	-3.32193
YGL108C	YGL108C		DMA	1.2	1.1	1.15	0.0707107	0.201634
YGL109W	YGL109W		DMA	1.3	1.1	1.2	0.141421	0.263034
YGL110C	CUE3		DMA	1	1	1	0	0
YGL112C	TAF6	taf6-ts	TSv6	1.03163	0.974153	1.00289	0.0406454	0.00416811
YGL113W	SLD3	sld3-ph	TSv6	0.948684	1.0437	0.996194	0.067189	-0.00550173
YGL114W	YGL114W		DMA	1.2	1.2	1.2	0	0.263034
YGL115W	SNF4		DMA	0.9	0.8	0.85	0.0707107	-0.234465
YGL116W	CDC20	cdc20-1	TSv6	1.09313	0.957907	1.02552	0.0956193	0.0363555
YGL116W	CDC20	cdc20-3	TSv6	1.72311	1.54109	1.6321	0.128707	0.706732
YGL116W	CDC20	cdc20-2	TSv6	1.69049	1.60098	1.64573	0.0632913	0.71873
YGL117W	YGL117W		DMA	1.3	1.6	1.45	0.212132	0.536053
YGL118C	YGL118C		DMA	1.3	1.3	1.3	0	0.378512
YGL120C	PRP43	prp43-ts2	TSv6	1.05467	1.07922	1.06695	0.0173602	0.0934888	1
YGL121C	GPG1		DMA	1	1.5	1.25	0.353553	0.321928
YGL124C	MON1		DMA	0.9	0.9	0.9	0	-0.152003	1
YGL125W	MET13		DMA	1.5	1.2	1.35	0.212132	0.432959
YGL126W	SCS3		DMA	1.3	1	1.15	0.212132	0.201634
YGL127C	SOH1		DMA	0.5	0.4	0.45	0.0707107	-1.152		1
YGL130W	CEG1	ceg1-c354	TSv6	0.366161	0.149138	0.257649	0.153458	-1.95652
YGL130W	CEG1	ceg1-3	TSv6	1.13428	1.02781	1.08104	0.0752864	0.112422
YGL130W	CEG1	ceg1-ts	TSv6	1.22711	1.21823	1.22267	0.00627591	0.290037
YGL130W	CEG1	ceg1-34	TSv6	1.28338	1.37259	1.32798	0.0630801	0.409237
YGL131C	SNT2		DMA	1.2	1.1	1.15	0.0707107	0.201634
YGL132W	YGL132W		DMA	1.2	1.3	1.25	0.0707107	0.321928
YGL133W	ITC1		DMA	0.9	1.2	1.05	0.212132	0.0703893
YGL136C	MRM2		DMA	0.3	0.3	0.3	0	-1.73697
YGL137W	SEC27	sec27-1	TSv6	1.07366	1.10592	1.08979	0.0228123	0.124053	1
YGL138C	YGL138C		DMA	1.7	1.4	1.55	0.212132	0.632268
YGL139W	FLC3		DMA	1	1.4	1.2	0.282843	0.263034
YGL140C	YGL140C		DMA	1.4	1.5	1.45	0.0707107	0.536053
YGL141W	HUL5		DMA	1.2	1	1.1	0.141421	0.137504
YGL142C	GPI10	gpi10-ph	TSv6	0.541075	0.310479	0.425777	0.163056	-1.23183	1
YGL144C	ROG1		DMA	1.1	1.1	1.1	0	0.137504
YGL145W	TIP20	tip20-5	TSv6	1.98228	1.55631	1.7693	0.301204	0.823176
YGL146C	RRT6		DMA	1	1.2	1.1	0.141421	0.137504
YGL147C	RPL9A		DMA	0.9	0.9	0.9	0	-0.152003
YGL148W	ARO2		DMA	0.9	0.8	0.85	0.0707107	-0.234465
YGL149W	YGL149W		DMA	1	1	1	0	0	1
YGL151W	NUT1		DMA	0.8	0.8	0.8	0	-0.321928
YGL152C	YGL152C		DMA	1	1.4	1.2	0.282843	0.263034
YGL153W	PEX14		DMA	1.2	1	1.1	0.141421	0.137504
YGL154C	LYS5		DMA	0.4	0.3	0.35	0.0707107	-1.51457
YGL155W	CDC43	cdc43-2	TSv6	1.08381	1.01986	1.05183	0.0452205	0.0729061
YGL156W	AMS1		DMA	1	1	1	0	0
YGL157W	ARI1		DMA	1.3	1	1.15	0.212132	0.201634
YGL158W	RCK1		DMA	1.3	1.2	1.25	0.0707107	0.321928
YGL159W	YGL159W		DMA	1	1	1	0	0
YGL160W	AIM14		DMA	1	0.9	0.95	0.0707107	-0.0740006
YGL161C	YIP5		DMA	1.2	1.1	1.15	0.0707107	0.201634
YGL162W	SUT1		DMA	1.1	1.1	1.1	0	0.137504
YGL163C	RAD54		DMA	1.1	0.9	1	0.141421	0
YGL164C	YRB30		DMA	1.6	2.7	2.15	0.777817	1.10434
YGL165C	YGL165C		DMA	1.8	1.9	1.85	0.0707107	0.887525
YGL166W	CUP2		DMA	1.3	1.2	1.25	0.0707107	0.321928
YGL167C	PMR1		DMA	0.7	0.8	0.75	0.0707107	-0.415037
YGL168W	HUR1		DMA	0.7	0.7	0.7	0	-0.514573
YGL170C	SPO74		DMA	1.2	1	1.1	0.141421	0.137504
YGL173C	XRN1		DMA	0.5	0.4	0.45	0.0707107	-1.152
YGL174W	BUD13		DMA	0.6	0.6	0.6	0	-0.736966	1
YGL175C	SAE2		DMA	0.9	1.2	1.05	0.212132	0.0703893
YGL176C	YGL176C		DMA	1.4	1.7	1.55	0.212132	0.632268
YGL177W	YGL177W		DMA	1.5	1.9	1.7	0.282843	0.765535
YGL179C	TOS3		DMA	1.3	1.4	1.35	0.0707107	0.432959
YGL180W	ATG1		DMA	1.2	1.1	1.15	0.0707107	0.201634
YGL181W	GTS1		DMA	1.2	1.2	1.2	0	0.263034
YGL194C	HOS2		DMA	0.7	0.8	0.75	0.0707107	-0.415037
YGL195W	GCN1		DMA	0.9	0.9	0.9	0	-0.152003
YGL196W	DSD1		DMA	1.1	1.4	1.25	0.212132	0.321928
YGL197W	MDS3		DMA	1	1.1	1.05	0.0707107	0.0703893
YGL198W	YIP4		DMA	1.2	1.2	1.2	0	0.263034
YGL199C	YGL199C		DMA	1	1	1	0	0
YGL202W	ARO8		DMA	1.1	0.9	1	0.141421	0	1
YGL203C	KEX1		DMA	1	1.2	1.1	0.141421	0.137504
YGL205W	POX1		DMA	1.2	1	1.1	0.141421	0.137504
YGL207W	SPT16	spt16-ts	TSv6	1.18362	1.25315	1.21839	0.0491644	0.284974
YGL208W	SIP2		DMA	1.1	1.1	1.1	0	0.137504
YGL209W	MIG2		DMA	1.2	1.1	1.15	0.0707107	0.201634
YGL210W	YPT32		DMA	0.8	1	0.9	0.141421	-0.152003
YGL211W	NCS6		DMA	0.9	0.9	0.9	0	-0.152003
YGL212W	VAM7		DMA	0.8	0.9	0.85	0.0707107	-0.234465	1
YGL213C	SKI8		DMA	0.7	0.7	0.7	0	-0.514573
YGL214W	YGL214W		DMA	0.2	0.3	0.25	0.0707107	-2
YGL215W	CLG1		DMA	1	0.9	0.95	0.0707107	-0.0740006
YGL216W	KIP3		DMA	0.9	1.2	1.05	0.212132	0.0703893
YGL217C	YGL217C		DMA	1	1	1	0	0
YGL218W	YGL218W		DMA	0.6	0.6	0.6	0	-0.736966
YGL219C	MDM34		DMA	0.7	0.9	0.8	0.141421	-0.321928
YGL219C	MDM34	mdm34-supp1	TSv6	1.46206	1.29305	1.37756	0.119507	0.462114
YGL221C	NIF3		DMA	1.3	1.3	1.3	0	0.378512
YGL222C	EDC1		DMA	1.3	1.1	1.2	0.141421	0.263034
YGL224C	SDT1		DMA	0.9	1	0.95	0.0707107	-0.0740006
YGL226C-A	OST5		DMA	1.5	1.3	1.4	0.141421	0.485427
YGL226W	MTC3		DMA	0.8	0.7	0.75	0.0707107	-0.415037
YGL227W	VID30		DMA	1.2	1	1.1	0.141421	0.137504
YGL228W	SHE10		DMA	1.2	1.1	1.15	0.0707107	0.201634
YGL229C	SAP4		DMA	1.2	1.3	1.25	0.0707107	0.321928
YGL230C	YGL230C		DMA	1	1	1	0	0
YGL231C	EMC4		DMA	1.4	1.2	1.3	0.141421	0.378512
YGL232W	TAN1		DMA	1.4	2	1.7	0.424264	0.765535
YGL233W	SEC15	sec15-1	TSv6	1.271	1.18753	1.22927	0.0590286	0.297797
YGL234W	ADE5,7		DMA	1.2	1.2	1.2	0	0.263034
YGL235W	YGL235W		DMA	1.1	1.1	1.1	0	0.137504
YGL236C	MTO1		DMA	1	1	1	0	0
YGL237C	HAP2		DMA	1	0.8	0.9	0.141421	-0.152003
YGL241W	KAP114		DMA	1.2	1.2	1.2	0	0.263034
YGL242C	YGL242C		DMA	1.4	1.2	1.3	0.141421	0.378512
YGL243W	TAD1		DMA	1.3	1.4	1.35	0.0707107	0.432959
YGL244W	RTF1		DMA	0.7	0.8	0.75	0.0707107	-0.415037		1
YGL245W	GUS1	gus1-ph	TSv6	1.6756	1.5701	1.62285	0.0746002	0.698532
YGL247W	BRR6	brr6-ph	TSv6	0.933441	0.796858	0.86515	0.096579	-0.208978
YGL248W	PDE1		DMA	1.6	1	1.3	0.424264	0.378512
YGL249W	ZIP2		DMA	1.2	1.6	1.4	0.282843	0.485427
YGL250W	RMR1		DMA	1.4	1.5	1.45	0.0707107	0.536053
YGL251C	HFM1		DMA	1.2	1.2	1.2	0	0.263034
YGL252C	RTG2		DMA	0.3	0.3	0.3	0	-1.73697
YGL253W	HXK2		DMA	0.8	0.9	0.85	0.0707107	-0.234465
YGL254W	FZF1		DMA	1.2	1	1.1	0.141421	0.137504
YGL255W	ZRT1		DMA	1	0.8	0.9	0.141421	-0.152003
YGL256W	ADH4		DMA	1.3	1	1.15	0.212132	0.201634
YGL257C	MNT2		DMA	1.3	1.2	1.25	0.0707107	0.321928
YGL258W	VEL1		DMA	1.2	1.2	1.2	0	0.263034
YGL259W	YPS5		DMA	1.5	1.3	1.4	0.141421	0.485427
YGL260W	YGL260W		DMA	1.3	1.3	1.3	0	0.378512
YGL261C	PAU11		DMA	1.7	1.8	1.75	0.0707107	0.807355
YGL262W	YGL262W		DMA	1.3	1.6	1.45	0.212132	0.536053
YGL263W	COS12		DMA	1.1	1.3	1.2	0.141421	0.263034
YGR001C	EFM5		DMA	1	1.1	1.05	0.0707107	0.0703893
YGR002C	SWC4	swc4-4	TSv6	0.88133	0.891487	0.886409	0.0071822	-0.173956
YGR003W	CUL3		DMA	1.2	1.3	1.25	0.0707107	0.321928
YGR004W	PEX31		DMA	1.2	1.3	1.25	0.0707107	0.321928
YGR005C	TFG2	tfg2-ph	TSv6	1.39471	1.3255	1.36011	0.0489387	0.443718
YGR006W	PRP18	prp18-1202	TSv6	0.944678	0.871253	0.907966	0.0519196	-0.13929
YGR006W	PRP18	prp18-ts	TSv6	1.04921	1.27647	1.16284	0.160699	0.217648
YGR007W	ECT1		DMA	1.3	1	1.15	0.212132	0.201634
YGR008C	STF2		DMA	1.3	1.1	1.2	0.141421	0.263034
YGR009C	SEC9	sec9-4	TSv6	0.223846	0.300802	0.262324	0.0544159	-1.93058
YGR010W	NMA2		DMA	1.2	1.2	1.2	0	0.263034
YGR011W	YGR011W		DMA	1.2	1.4	1.3	0.141421	0.378512
YGR012W	YGR012W		DMA	1.9	1.5	1.7	0.282843	0.765535
YGR013W	SNU71	snu71-ph	TSv6	2.12339	1.6105	1.86694	0.362666	0.900679
YGR014W	MSB2		DMA	1.6	1.4	1.5	0.141421	0.584963
YGR015C	YGR015C		DMA	1.3	1.5	1.4	0.141421	0.485427
YGR016W	YGR016W		DMA	1.1	1.1	1.1	0	0.137504
YGR017W	YGR017W		DMA	0.9	0.9	0.9	0	-0.152003
YGR018C	YGR018C		DMA	0.9	1.1	1	0.141421	0
YGR019W	UGA1		DMA	1.1	1.3	1.2	0.141421	0.263034
YGR021W	YGR021W		DMA	1.2	1.2	1.2	0	0.263034
YGR022C	YGR022C		DMA	1.3	1.2	1.25	0.0707107	0.321928
YGR023W	MTL1		DMA	1.8	1.4	1.6	0.282843	0.678072
YGR025W	YGR025W		DMA	1.7	1.9	1.8	0.141421	0.847997
YGR026W	YGR026W		DMA	1.6	1.2	1.4	0.282843	0.485427
YGR027C	RPS25A		DMA	0.7	0.9	0.8	0.141421	-0.321928
YGR028W	MSP1		DMA	1	1.1	1.05	0.0707107	0.0703893
YGR031W	IMO32		DMA	1.1	1.2	1.15	0.0707107	0.201634
YGR032W	GSC2		DMA	1	1.2	1.1	0.141421	0.137504
YGR033C	TIM21		DMA	1.1	1	1.05	0.0707107	0.0703893
YGR034W	RPL26B		DMA	1	1	1	0	0
YGR035C	YGR035C		DMA	1	0.9	0.95	0.0707107	-0.0740006
YGR037C	ACB1		DMA	0.9	0.9	0.9	0	-0.152003
YGR038W	ORM1		DMA	1.1	1	1.05	0.0707107	0.0703893
YGR039W	YGR039W		DMA	1	1.2	1.1	0.141421	0.137504
YGR040W	KSS1		DMA	1.1	1.2	1.15	0.0707107	0.201634
YGR041W	BUD9		DMA	1.3	1	1.15	0.212132	0.201634
YGR042W	YGR042W		DMA	1.3	1.2	1.25	0.0707107	0.321928
YGR043C	NQM1		DMA	1.1	1.1	1.1	0	0.137504
YGR044C	RME1		DMA	1.2	1.3	1.25	0.0707107	0.321928
YGR045C	YGR045C		DMA	1.3	0.9	1.1	0.282843	0.137504
YGR047C	TFC4	ygr047c-ph	TSv6	1.40317	1.30194	1.35255	0.0715777	0.435686
YGR048W	UFD1	ufd1-2	TSv6	1.68011	1.65864	1.66938	0.0151811	0.739312
YGR049W	SCM4		DMA	1	0.9	0.95	0.0707107	-0.0740006
YGR050C	YGR050C		DMA	1.2	1.2	1.2	0	0.263034
YGR051C	YGR051C		DMA	1.2	1.2	1.2	0	0.263034
YGR052W	FMP48		DMA	1.2	1	1.1	0.141421	0.137504
YGR053C	YGR053C		DMA	1	1.1	1.05	0.0707107	0.0703893
YGR054W	YGR054W		DMA	1	1.2	1.1	0.141421	0.137504
YGR055W	MUP1		DMA	2.6	1.7	2.15	0.636396	1.10434
YGR058W	PEF1		DMA	1.1	1.1	1.1	0	0.137504
YGR059W	SPR3		DMA	1	0.8	0.9	0.141421	-0.152003
YGR061C	ADE6		DMA	0.9	0.9	0.9	0	-0.152003
YGR066C	YGR066C		DMA	1.3	1.3	1.3	0	0.378512
YGR067C	YGR067C		DMA	1.1	1.2	1.15	0.0707107	0.201634
YGR068C	ART5		DMA	1	1.1	1.05	0.0707107	0.0703893
YGR069W	YGR069W		DMA	1.1	0.9	1	0.141421	0
YGR070W	ROM1		DMA	1.2	1.1	1.15	0.0707107	0.201634
YGR071C	ENV11		DMA	1.1	1.1	1.1	0	0.137504
YGR072W	UPF3		DMA	1	0.9	0.95	0.0707107	-0.0740006
YGR074W	SMD1	smd1-1	TSv6	0.612897	0.457632	0.535265	0.109789	-0.901676
YGR075C	PRP38	prp38-1	TSv6	1.60833	1.58384	1.59608	0.0173208	0.674537
YGR077C	PEX8		DMA	0.7	0.9	0.8	0.141421	-0.321928
YGR078C	PAC10		DMA	0.8	0.9	0.85	0.0707107	-0.234465
YGR079W	YGR079W		DMA	0.7	1.2	0.95	0.353553	-0.0740006
YGR080W	TWF1		DMA	1.2	1.1	1.15	0.0707107	0.201634
YGR081C	SLX9		DMA	0.3	0.3	0.3	0	-1.73697	1
YGR084C	MRP13		DMA	1.7	1	1.35	0.494975	0.432959
YGR085C	RPL11B		DMA	0.7	0.6	0.65	0.0707107	-0.621488
YGR086C	PIL1		DMA	1.2	1.2	1.2	0	0.263034
YGR087C	PDC6		DMA	1.1	0.9	1	0.141421	0
YGR088W	CTT1		DMA	1.2	1	1.1	0.141421	0.137504
YGR089W	NNF2		DMA	0.9	1.1	1	0.141421	0
YGR091W	PRP31	prp31-1	TSv6	1.50373	1.50889	1.50631	0.00364718	0.591021
YGR091W	PRP31	prp31-ts	TSv6	1.6574	1.61077	1.63409	0.0329737	0.708484
YGR092W	DBF2		DMA	0.6	0.6	0.6	0	-0.736966
YGR092W	DBF2	dbf2-3	TSv6	1.13697	1.33188	1.23442	0.137822	0.303838
YGR092W	DBF2	dbf2-2	TSv6	1.3919	1.23717	1.31453	0.10941	0.394548
YGR092W	DBF2	dbf2-1	TSv6	1.572	2.73852	2.15526	0.824856	1.10786
YGR093W	DRN1		DMA	1	1.3	1.15	0.212132	0.201634
YGR094W	VAS1	ygr094w-ph	TSv6	1.2999	1.20259	1.25125	0.068811	0.323366
YGR096W	TPC1		DMA	1.4	1	1.2	0.282843	0.263034
YGR097W	ASK10		DMA	0.7	0.8	0.75	0.0707107	-0.415037
YGR098C	ESP1	esp1-1	TSv6	1.26264	1.42017	1.3414	0.111391	0.423742
YGR099W	TEL2	tel2-7	TSv6	1.56922	1.51499	1.54211	0.0383454	0.624903
YGR099W	TEL2	tel2-15	TSv6	1.65282	1.47199	1.56241	0.127865	0.643772
YGR100W	MDR1		DMA	1.3	1.2	1.25	0.0707107	0.321928
YGR101W	PCP1		DMA	0.7	0.7	0.7	0	-0.514573
YGR103W	NOP7	nop7-1	TSv6	1.27818	1.39986	1.33902	0.0860435	0.421177
YGR105W	VMA21		DMA	0.6	0.5	0.55	0.0707107	-0.862496
YGR106C	VOA1		DMA	1.2	1.1	1.15	0.0707107	0.201634
YGR107W	YGR107W		DMA	1.1	1	1.05	0.0707107	0.0703893
YGR108W	CLB1		DMA	1.2	1.3	1.25	0.0707107	0.321928
YGR109C	CLB6		DMA	1.1	1.1	1.1	0	0.137504
YGR110W	CLD1		DMA	1.1	1.1	1.1	0	0.137504
YGR111W	YGR111W		DMA	0.9	1	0.95	0.0707107	-0.0740006
YGR113W	DAM1	dam1-19	TSv6	0.983641	1.19025	1.08694	0.146094	0.120279
YGR113W	DAM1	dam1-9	TSv6	1.15369	1.32668	1.24018	0.122327	0.310555
YGR113W	DAM1	dam1-11	TSv6	1.27815	1.67945	1.4788	0.283762	0.56443
YGR113W	DAM1	dam1-5	TSv6	1.50959	1.49984	1.50471	0.00689728	0.589489
YGR113W	DAM1	dam1-1	TSv6	1.75177	2.02566	1.88872	0.193669	0.917408
YGR116W	SPT6	spt6-14	TSv6	0.800521	1.00123	0.900873	0.14192	-0.150604
YGR117C	YGR117C		DMA	0.8	1.3	1.05	0.353553	0.0703893
YGR118W	RPS23A		DMA	0.9	0.9	0.9	0	-0.152003
YGR119C	NUP57	nup57-e17	TSv6	0.468492	0.326645	0.397569	0.100301	-1.33072	1
YGR120C	COG2	cog2-1	TSv6	1.37415	2.18419	1.77917	0.572779	0.831204	1
YGR121C	MEP1		DMA	1.5	1.2	1.35	0.212132	0.432959
YGR122C-A	YGR122C-A		DMA	1	1	1	0	0
YGR122W	YGR122W		DMA	0.9	1	0.95	0.0707107	-0.0740006
YGR122W	YGR122W	ygr122w	TSv6	1.31208	1.41882	1.36545	0.0754775	0.449376
YGR123C	PPT1		DMA	1.6	1.7	1.65	0.0707107	0.722466
YGR124W	ASN2		DMA	1.1	1.6	1.35	0.353553	0.432959
YGR125W	YGR125W		DMA	1	0.8	0.9	0.141421	-0.152003
YGR125W	YGR125W	ygr125w	TSv6	1.38409	1.62192	1.503	0.168171	0.587848
YGR126W	YGR126W		DMA	1.2	1.2	1.2	0	0.263034
YGR127W	YGR127W		DMA	1.2	1.1	1.15	0.0707107	0.201634
YGR129W	SYF2		DMA	1	1.2	1.1	0.141421	0.137504
YGR130C	YGR130C		DMA	1.1	1.3	1.2	0.141421	0.263034
YGR131W	FHN1		DMA	1.4	1.6	1.5	0.141421	0.584963
YGR132C	PHB1		DMA	1	1.2	1.1	0.141421	0.137504		1
YGR133W	PEX4		DMA	1.6	1.2	1.4	0.282843	0.485427
YGR134W	CAF130		DMA	1.2	1.1	1.15	0.0707107	0.201634
YGR135W	PRE9		DMA	1	0.9	0.95	0.0707107	-0.0740006
YGR136W	LSB1		DMA	1.2	1.2	1.2	0	0.263034
YGR137W	YGR137W		DMA	1.1	1.3	1.2	0.141421	0.263034
YGR138C	TPO2		DMA	1.2	1	1.1	0.141421	0.137504
YGR139W	YGR139W		DMA	1.2	1.2	1.2	0	0.263034
YGR140W	CBF2	cbf2-42	TSv6	1.50568	1.38182	1.44375	0.0875807	0.52982
YGR140W	CBF2	cbf2-1	TSv6	1.69011	1.41204	1.55108	0.196631	0.633269
YGR140W	CBF2	cbf2-2	TSv6	1.78242	1.50666	1.64454	0.194994	0.717682
YGR141W	VPS62		DMA	1.2	1.1	1.15	0.0707107	0.201634
YGR142W	BTN2		DMA	1.1	1	1.05	0.0707107	0.0703893
YGR143W	SKN1		DMA	1.2	1.2	1.2	0	0.263034
YGR144W	THI4		DMA	1.4	1.1	1.25	0.212132	0.321928
YGR146C	ECL1		DMA	1.4	1.2	1.3	0.141421	0.378512
YGR148C	RPL24B		DMA	0.8	0.7	0.75	0.0707107	-0.415037
YGR149W	YGR149W		DMA	1.4	1.3	1.35	0.0707107	0.432959
YGR151C	YGR151C		DMA	1.3	1.2	1.25	0.0707107	0.321928
YGR152C	RSR1		DMA	1	1	1	0	0
YGR153W	YGR153W		DMA	1	1.2	1.1	0.141421	0.137504
YGR154C	GTO1		DMA	1.5	1.2	1.35	0.212132	0.432959
YGR156W	PTI1	pti1-ts7	TSv6	1.29381	1.45691	1.37536	0.115323	0.459809
YGR156W	PTI1	pti1-ts1	TSv6	1.97977	2.29081	2.13529	0.219941	1.09443
YGR157W	CHO2		DMA	0.6	0.5	0.55	0.0707107	-0.862496		1
YGR158C	MTR3	mtr3-ts	TSv6	0.413756	0.405842	0.409799	0.00559559	-1.28701
YGR161C	RTS3		DMA	1.1	1.2	1.15	0.0707107	0.201634
YGR163W	GTR2		DMA	1.1	0.8	0.95	0.212132	-0.0740006
YGR164W	YGR164W		DMA	1	1.3	1.15	0.212132	0.201634
YGR166W	TRS65		DMA	1	1.1	1.05	0.0707107	0.0703893
YGR168C	YGR168C		DMA	1.1	1.1	1.1	0	0.137504
YGR169C	PUS6		DMA	1.1	1.2	1.15	0.0707107	0.201634
YGR170W	PSD2		DMA	1	0.9	0.95	0.0707107	-0.0740006
YGR172C	YIP1	yip1-ph	TSv6	1.27458	1.5314	1.40299	0.181597	0.488508
YGR172C	YIP1	yip1-40	TSv6	1.73474	1.47754	1.60614	0.181865	0.683599
YGR172C	YIP1	yip1-4	TSv6	1.67013	1.70465	1.68739	0.0244097	0.754796
YGR173W	RBG2		DMA	1.3	1.1	1.2	0.141421	0.263034
YGR174C	CBP4		DMA	0.7	0.9	0.8	0.141421	-0.321928
YGR176W	YGR176W		DMA	1.6	1	1.3	0.424264	0.378512
YGR177C	ATF2		DMA	1.4	1.3	1.35	0.0707107	0.432959
YGR178C	PBP1		DMA	1.4	1	1.2	0.282843	0.263034
YGR179C	OKP1	okp1-5	TSv6	2.12954	1.88471	2.00712	0.173121	1.00513
YGR181W	TIM13		DMA	1.3	1.1	1.2	0.141421	0.263034
YGR182C	YGR182C		DMA	0.8	0.8	0.8	0	-0.321928
YGR183C	QCR9		DMA	0.8	0.8	0.8	0	-0.321928
YGR184C	UBR1		DMA	1.2	1.4	1.3	0.141421	0.378512
YGR185C	TYS1	tys1-1	TSv6	0.849145	0.89416	0.871652	0.0318303	-0.198175
YGR187C	HGH1		DMA	0.9	1.1	1	0.141421	0
YGR188C	BUB1		DMA	0.5	0.4	0.45	0.0707107	-1.152
YGR189C	CRH1		DMA	1.1	1.3	1.2	0.141421	0.263034
YGR192C	TDH3		DMA	1	0.8	0.9	0.141421	-0.152003
YGR193C	PDX1		DMA	0.9	1	0.95	0.0707107	-0.0740006
YGR194C	XKS1		DMA	1	1	1	0	0
[truncated: 3,096 more rows]

## Sheet: GFPunit(tGFP)
ORF	Name	Allele	array name	GFPunit_Rep1	GFPunit_Rep2	GFPunit_Average	GFPunit_STDEV	GFPunuit (log2)	GFP-op_nega	GFP-op_posi
YAL001C	TFC3	tfc3-g349e	TSv6	1.68498	1.69824	1.69161	0.00938011	0.758396
YAL002W	VPS8		DMA	0.8	0.8	0.8	0	-0.321928	1
YAL003W	EFB1	efb1-4	TSv6	0.421874	0.979723	0.700799	0.394458	-0.512928
YAL004W	YAL004W		DMA	0.9	1.2	1.05	0.212132	0.0703893	1
YAL005C	SSA1		DMA	1	1	1	0	0
YAL007C	ERP2		DMA	1.2	1	1.1	0.141421	0.137504
YAL008W	FUN14		DMA	1.2	1.4	1.3	0.141421	0.378512
YAL010C	MDM10		DMA	0.8	0.8	0.8	0	-0.321928
YAL011W	SWC3		DMA	0.9	0.9	0.9	0	-0.152003
YAL013W	DEP1		DMA	0.7	0.7	0.7	0	-0.514573
YAL014C	SYN8		DMA	1	1.1	1.05	0.0707107	0.0703893
YAL015C	NTG1		DMA	1	1	1	0	0
YAL017W	PSK1		DMA	1.1	1	1.05	0.0707107	0.0703893
YAL018C	LDS1		DMA	1.8	1	1.4	0.565685	0.485427
YAL019W	FUN30		DMA	1.1	0.9	1	0.141421	0
YAL020C	ATS1		DMA	1	1.1	1.05	0.0707107	0.0703893
YAL022C	FUN26		DMA	1.1	1.1	1.1	0	0.137504
YAL023C	PMT2		DMA	1.3	1.2	1.25	0.0707107	0.321928
YAL024C	LTE1		DMA	0.7	0.6	0.65	0.0707107	-0.621488	1
YAL025C	MAK16	mak16-ph	TSv6	0.886433	0.901841	0.894137	0.0108955	-0.161432	1
YAL026C	DRS2		DMA	0.6	0.6	0.6	0	-0.736966
YAL027W	SAW1		DMA	1.1	1.1	1.1	0	0.137504
YAL028W	FRT2		DMA	1.1	0.9	1	0.141421	0
YAL029C	MYO4		DMA	1	1.2	1.1	0.141421	0.137504
YAL030W	SNC1		DMA	0.8	0.9	0.85	0.0707107	-0.234465
YAL031C	GIP4		DMA	1.1	1.1	1.1	0	0.137504
YAL034C	FUN19		DMA	1.1	1.3	1.2	0.141421	0.263034
YAL034W-A	MTW1	mtw1-ts	TSv6	1.33158	1.14244	1.23701	0.133749	0.306857
YAL036C	RBG1		DMA	1.2	1.4	1.3	0.141421	0.378512
YAL037W	YAL037W		DMA	1.2	1.3	1.25	0.0707107	0.321928
YAL038W	CDC19	cdc19-1	TSv6	1.17088	1.05454	1.11271	0.0822679	0.154078
YAL040C	CLN3		DMA	0.9	1.1	1	0.141421	0
YAL041W	CDC24	cdc24-5	TSv6	0.800913	0.830402	0.815658	0.0208518	-0.293965
YAL041W	CDC24	cdc24-11	TSv6	1.06909	1.06049	1.06479	0.0060778	0.0905687
YAL041W	CDC24	cdc24-1	TSv6	1.10414	1.06867	1.0864	0.0250816	0.119559
YAL041W	CDC24	cdc24-h	TSv6	1.15261	1.1936	1.1731	0.0289825	0.230329
YAL041W	CDC24	cdc24-3	TSv6	1.28786	1.13952	1.21369	0.104896	0.279401
YAL041W	CDC24	cdc24-4	TSv6	1.43678	1.3946	1.41569	0.0298308	0.501504
YAL041W	CDC24	cdc24-2	TSv6	1.66283	1.50219	1.58251	0.113586	0.662216
YAL042C-A	YAL042C-A		DMA	1.1	1.3	1.2	0.141421	0.263034
YAL042W	ERV46		DMA	1.1	0.2	0.65	0.636396	-0.621488
YAL045C	YAL045C		DMA	1.1	1.1	1.1	0	0.137504
YAL046C	AIM1		DMA	1.2	1.1	1.15	0.0707107	0.201634
YAL048C	GEM1		DMA	1.3	1	1.15	0.212132	0.201634
YAL049C	AIM2		DMA	1	1	1	0	0
YAL051W	OAF1		DMA	1	1.1	1.05	0.0707107	0.0703893
YAL053W	FLC2		DMA	1	1	1	0	0
YAL054C	ACS1		DMA	1.1	1.1	1.1	0	0.137504
YAL055W	PEX22		DMA	1	1.2	1.1	0.141421	0.137504
YAL056C-A	YAL056C-A		DMA	1.3	1.1	1.2	0.141421	0.263034
YAL056W	GPB2		DMA	1.5	1.1	1.3	0.282843	0.378512
YAL058W	CNE1		DMA	1.3	1.4	1.35	0.0707107	0.432959
YAL059W	ECM1		DMA	1.1	1.2	1.15	0.0707107	0.201634
YAL060W	BDH1		DMA	1.2	1.4	1.3	0.141421	0.378512
YAL061W	BDH2		DMA	1.2	1.2	1.2	0	0.263034
YAL062W	GDH3		DMA	1.1	1.1	1.1	0	0.137504
YAL064C-A	TDA8		DMA	1.3	1	1.15	0.212132	0.201634
YAL065C	YAL065C		DMA	1.1	1.1	1.1	0	0.137504
YAL066W	YAL066W		DMA	1	0.9	0.95	0.0707107	-0.0740006
YAL067C	SEO1		DMA	1.2	1.1	1.15	0.0707107	0.201634
YAL068C	PAU8		DMA	1.3	1.1	1.2	0.141421	0.263034
YAR002C-A	ERP1		DMA	1.5	1.2	1.35	0.212132	0.432959
YAR002W	NUP60		DMA	1.3	1.1	1.2	0.141421	0.263034
YAR003W	SWD1		DMA	0.9	0.9	0.9	0	-0.152003
YAR007C	RFA1	rfa1-m2	TSv6	1.19869	1.1648	1.18174	0.0239602	0.240916
YAR014C	BUD14		DMA	0.8	0.7	0.75	0.0707107	-0.415037
YAR015W	ADE1		DMA	1.1	0.9	1	0.141421	0
YAR018C	KIN3		DMA	0.9	0.7	0.8	0.141421	-0.321928
YAR019C	CDC15	cdc15-2	TSv6	0.615765	0.746851	0.681308	0.0926917	-0.553621
YAR019C	CDC15	cdc15-1	TSv6	1.1364	1.17818	1.15729	0.0295446	0.210752
YAR020C	PAU7		DMA	1.2	1	1.1	0.141421	0.137504
YAR023C	YAR023C		DMA	1.1	1	1.05	0.0707107	0.0703893
YAR027W	UIP3		DMA	1	1	1	0	0
YAR028W	YAR028W		DMA	1.2	1.3	1.25	0.0707107	0.321928
YAR029W	YAR029W		DMA	1.4	1.5	1.45	0.0707107	0.536053
YAR030C	YAR030C		DMA	1.1	1.2	1.15	0.0707107	0.201634
YAR031W	PRM9		DMA	1.3	1.3	1.3	0	0.378512
YAR035W	YAT1		DMA	1.1	1.3	1.2	0.141421	0.263034
YAR037W	YAR037W		DMA	1.2	1.3	1.25	0.0707107	0.321928
YAR040C	YAR040C		DMA	1	1	1	0	0
YAR042W	SWH1		DMA	1.1	1.1	1.1	0	0.137504
YAR043C	YAR043C		DMA	1.1	1.2	1.15	0.0707107	0.201634
YAR044W	YAR044W		DMA	0.9	1	0.95	0.0707107	-0.0740006
YAR047C	YAR047C		DMA	1.1	1.2	1.15	0.0707107	0.201634
YAR050W	FLO1		DMA	1.1	1.1	1.1	0	0.137504
YBL001C	ECM15		DMA	2.1	1.3	1.7	0.565685	0.765535
YBL003C	HTA2		DMA	1.1	1.2	1.15	0.0707107	0.201634
YBL005W	PDR3		DMA	1.1	1.1	1.1	0	0.137504
YBL007C	SLA1		DMA	0.8	0.8	0.8	0	-0.321928
YBL008W	HIR1		DMA	1	1	1	0	0
YBL009W	ALK2		DMA	1.1	1.1	1.1	0	0.137504
YBL010C	YBL010C		DMA	1.1	1.2	1.15	0.0707107	0.201634
YBL011W	SCT1		DMA	0.9	1	0.95	0.0707107	-0.0740006
YBL013W	FMT1		DMA	1	1	1	0	0		1
YBL015W	ACH1		DMA	1.2	1	1.1	0.141421	0.137504
YBL016W	FUS3		DMA	0.6	0.8	0.7	0.141421	-0.514573
YBL017C	PEP1		DMA	0.9	1	0.95	0.0707107	-0.0740006
YBL019W	APN2		DMA	1.4	1.2	1.3	0.141421	0.378512
YBL021C	HAP3		DMA	1.2	1	1.1	0.141421	0.137504
YBL023C	MCM2	mcm2-1	TSv6	1.19692	1.08471	1.14081	0.0793452	0.190062		1
YBL024W	NCL1		DMA	1.1	1.2	1.15	0.0707107	0.201634
YBL025W	RRN10		DMA	0.4	0.3	0.35	0.0707107	-1.51457
YBL026W	LSM2	lsm2-ph	TSv6	0.953875	1.08463	1.01925	0.0924576	0.0275118
YBL027W	RPL19B		DMA	0.8	0.6	0.7	0.141421	-0.514573
YBL028C	YBL028C		DMA	1.6	1.3	1.45	0.212132	0.536053
YBL029W	YBL029W		DMA	1.4	1.1	1.25	0.212132	0.321928
YBL031W	SHE1		DMA	0.3	0.2	0.25	0.0707107	-2
YBL032W	HEK2		DMA	1	1	1	0	0
YBL034C	STU1	stu1-7	TSv6	0.175055	0.3354	0.255228	0.113381	-1.97014
YBL034C	STU1	stu1-8	TSv6	1.25825	1.17217	1.21521	0.0608659	0.28121
YBL034C	STU1	stu1-6	TSv6	1.47974	1.46648	1.47311	0.00937575	0.558864
YBL034C	STU1	stu1-12	TSv6	1.44007	1.57038	1.50523	0.0921463	0.589982
YBL034C	STU1	stu1-5	TSv6	1.67304	1.42146	1.54725	0.177895	0.629705
YBL035C	POL12	pol12-ts	TSv6	1.17881	1.11611	1.14746	0.0443346	0.198447
YBL036C	YBL036C		DMA	1.2	1.3	1.25	0.0707107	0.321928
YBL037W	APL3		DMA	0.9	1	0.95	0.0707107	-0.0740006
YBL039C	URA7		DMA	1.2	1.1	1.15	0.0707107	0.201634
YBL040C	ERD2	erd2-ph	TSv6	1.30109	1.24137	1.27123	0.0422315	0.346223
YBL041W	PRE7	pre7-ph	TSv6	1.35019	1.33394	1.34206	0.0114957	0.424455
YBL042C	FUI1		DMA	1.3	1.4	1.35	0.0707107	0.432959
YBL043W	ECM13		DMA	1.1	1.3	1.2	0.141421	0.263034
YBL046W	PSY4		DMA	1.1	1.3	1.2	0.141421	0.263034
YBL047C	EDE1		DMA	1.2	1	1.1	0.141421	0.137504
YBL048W	RRT1		DMA	1	1.3	1.15	0.212132	0.201634
YBL049W	MOH1		DMA	1.1	1.1	1.1	0	0.137504
YBL050W	SEC17	sec17-1	TSv6	1.40376	1.08438	1.24407	0.225833	0.315067
YBL051C	PIN4		DMA	0.9	0.9	0.9	0	-0.152003
YBL052C	SAS3		DMA	1	1	1	0	0
YBL053W	YBL053W		DMA	1.2	1	1.1	0.141421	0.137504
YBL054W	TOD6		DMA	1.3	1.5	1.4	0.141421	0.485427
YBL055C	YBL055C		DMA	1.3	1.1	1.2	0.141421	0.263034
YBL056W	PTC3		DMA	1.3	1.2	1.25	0.0707107	0.321928
YBL057C	PTH2		DMA	1.2	1.2	1.2	0	0.263034
YBL059W	YBL059W		DMA	1	1	1	0	0
YBL060W	YEL1		DMA	1	1	1	0	0
YBL061C	SKT5		DMA	1.2	0.9	1.05	0.212132	0.0703893
YBL062W	YBL062W		DMA	0.9	1.1	1	0.141421	0
YBL063W	KIP1		DMA	0.9	1	0.95	0.0707107	-0.0740006
YBL064C	PRX1		DMA	1	1.1	1.05	0.0707107	0.0703893
YBL065W	YBL065W		DMA	1	1.3	1.15	0.212132	0.201634
YBL066C	SEF1		DMA	0.9	1	0.95	0.0707107	-0.0740006
YBL067C	UBP13		DMA	1.4	1.4	1.4	0	0.485427
YBL068W	PRS4		DMA	1.3	1.2	1.25	0.0707107	0.321928
YBL069W	AST1		DMA	1.2	1.3	1.25	0.0707107	0.321928
YBL070C	YBL070C		DMA	1.2	1.4	1.3	0.141421	0.378512
YBL071C	YBL071C		DMA	1	1.2	1.1	0.141421	0.137504
YBL072C	RPS8A		DMA	0.5	0.6	0.55	0.0707107	-0.862496
YBL074C	AAR2	aar2-ph	TSv6	1.3141	1.14882	1.23146	0.116874	0.300368	1
YBL075C	SSA3		DMA	1	1	1	0	0
YBL076C	ILS1	ils1-1	TSv6	1.24137	0.292525	0.766946	0.670932	-0.382804
YBL078C	ATG8		DMA	1	0.9	0.95	0.0707107	-0.0740006
YBL079W	NUP170		DMA	0.7	0.7	0.7	0	-0.514573
YBL081W	YBL081W		DMA	1	1	1	0	0
YBL082C	ALG3		DMA	1.1	1.2	1.15	0.0707107	0.201634
YBL083C	YBL083C		DMA	1.2	1.1	1.15	0.0707107	0.201634
YBL084C	CDC27	cdc27-2	TSv6	1.22701	1.08025	1.15363	0.103772	0.206178
YBL084C	CDC27	cdc27-1	TSv6	1.13118	1.27246	1.20182	0.0999025	0.265221
YBL085W	BOI1		DMA	1.6	2.1	1.85	0.353553	0.887525
YBL086C	YBL086C		DMA	1.2	1	1.1	0.141421	0.137504
YBL087C	RPL23A		DMA	0.9	0.8	0.85	0.0707107	-0.234465
YBL088C	TEL1		DMA	1.5	1.1	1.3	0.282843	0.378512
YBL089W	AVT5		DMA	0.9	0.9	0.9	0	-0.152003
YBL091C	MAP2		DMA	1.1	1.1	1.1	0	0.137504
YBL091C-A	SCS22		DMA	1	1	1	0	0
YBL093C	ROX3	rox3-182	TSv6	0.989121	0.818973	0.904047	0.120313	-0.14553	1
YBL094C	YBL094C		DMA	0.5	0.6	0.55	0.0707107	-0.862496
YBL095W	MRX3		DMA	1.2	1.4	1.3	0.141421	0.378512
YBL096C	YBL096C		DMA	1.2	1.2	1.2	0	0.263034
YBL097W	BRN1	brn1-9	TSv6	0.969826	0.968879	0.969353	0.000669698	-0.0449062
YBL097W	BRN1	brn1-16	TSv6	1.63548	1.7327	1.68409	0.0687396	0.75197
YBL098W	BNA4		DMA	1.3	1.3	1.3	0	0.378512
YBL100C	YBL100C		DMA	1.2	1.1	1.15	0.0707107	0.201634
YBL101C	ECM21		DMA	1.2	1.2	1.2	0	0.263034
YBL102W	SFT2		DMA	1.2	1.1	1.15	0.0707107	0.201634
YBL103C	RTG3		DMA	0.4	0.5	0.45	0.0707107	-1.152
YBL103C	RTG3		DMA	0.9	1	0.95	0.0707107	-0.0740006
YBL104C	SEA4		DMA	1	1	1	0	0
YBL105C	PKC1	pkc1-4	TSv6	0.928767	0.796829	0.862798	0.0932939	-0.212905
YBL105C	PKC1	pkc1-2	TSv6	0.872807	0.919937	0.896372	0.0333261	-0.157831
YBL105C	PKC1	pkc1-1	TSv6	1.0132	1.08766	1.05043	0.052651	0.070984
YBL105C	PKC1	pkc1-3	TSv6	1.31932	1.29754	1.30843	0.0154077	0.387837
YBL105C	PKC1	pkc1-ts	TSv6	1.48168	1.40981	1.44574	0.0508215	0.531811
YBL106C	SRO77		DMA	1	1.1	1.05	0.0707107	0.0703893
YBL107C	MIX23		DMA	0.7	1	0.85	0.212132	-0.234465
YBR001C	NTH2		DMA	1	1.1	1.05	0.0707107	0.0703893
YBR004C	GPI18	ybr004c-ph	TSv6	1.72789	1.50576	1.61682	0.157066	0.693163
YBR005W	RCR1		DMA	1.1	1.3	1.2	0.141421	0.263034
YBR006W	UGA2		DMA	1.2	1.5	1.35	0.212132	0.432959
YBR007C	DSF2		DMA	1.4	1.6	1.5	0.141421	0.584963
YBR008C	FLR1		DMA	1.3	1.2	1.25	0.0707107	0.321928
YBR009C	HHF1		DMA	1.1	1.1	1.1	0	0.137504
YBR010W	HHT1		DMA	1	1	1	0	0
YBR011C	IPP1	ipp1-ph	TSv6	0.856547	0.674089	0.765318	0.129017	-0.385869
YBR012C	YBR012C		DMA	1	1	1	0	0
YBR013C	YBR013C		DMA	1.1	1.1	1.1	0	0.137504
YBR014C	GRX7		DMA	1.1	1.1	1.1	0	0.137504
YBR015C	MNN2		DMA	0.9	0.9	0.9	0	-0.152003
YBR016W	YBR016W		DMA	1.2	1.2	1.2	0	0.263034
YBR018C	GAL7		DMA	1	0.8	0.9	0.141421	-0.152003
YBR019C	GAL10		DMA	1	1.4	1.2	0.282843	0.263034
YBR020W	GAL1		DMA	1.2	1.1	1.15	0.0707107	0.201634
YBR020W	GAL1		DMA	1.4	1.1	1.25	0.212132	0.321928
YBR022W	POA1		DMA	1.2	1	1.1	0.141421	0.137504
YBR023C	CHS3		DMA	1.1	0.9	1	0.141421	0
YBR024W	SCO2		DMA	1.1	1.6	1.35	0.353553	0.432959
YBR025C	OLA1		DMA	0.9	1.1	1	0.141421	0
YBR026C	ETR1		DMA	0.7	0.6	0.65	0.0707107	-0.621488	1
YBR027C	YBR027C		DMA	1.1	1.2	1.15	0.0707107	0.201634
YBR028C	YPK3		DMA	1	1.1	1.05	0.0707107	0.0703893
YBR029C	CDS1	cds1-ph	TSv6	1.42659	1.40608	1.41633	0.0145016	0.502158
YBR030W	RKM3		DMA	1.3	1	1.15	0.212132	0.201634
YBR031W	RPL4A		DMA	0.9	0.9	0.9	0	-0.152003
YBR032W	YBR032W		DMA	1.3	1	1.15	0.212132	0.201634
YBR033W	EDS1		DMA	1	1.1	1.05	0.0707107	0.0703893
YBR034C	HMT1		DMA	0.9	1.4	1.15	0.353553	0.201634
YBR036C	CSG2		DMA	0.5	0.6	0.55	0.0707107	-0.862496
YBR040W	FIG1		DMA	1.4	2	1.7	0.424264	0.765535
YBR041W	FAT1		DMA	1	1.1	1.05	0.0707107	0.0703893
YBR042C	CST26		DMA	1.1	1.1	1.1	0	0.137504
YBR043C	QDR3		DMA	1.1	1	1.05	0.0707107	0.0703893
YBR044C	TCM62		DMA	0.9	1	0.95	0.0707107	-0.0740006
YBR045C	GIP1		DMA	1.1	1	1.05	0.0707107	0.0703893
YBR046C	ZTA1		DMA	1.2	1.2	1.2	0	0.263034
YBR047W	FMP23		DMA	1	1.1	1.05	0.0707107	0.0703893
YBR048W	RPS11B		DMA	0.9	0.8	0.85	0.0707107	-0.234465
YBR049C	REB1	reb1-ph	TSv6	0.233708	0.222252	0.22798	0.00810081	-2.13302
YBR050C	REG2		DMA	1.2	1.2	1.2	0	0.263034
YBR051W	YBR051W		DMA	1.8	1.6	1.7	0.141421	0.765535
YBR052C	RFS1		DMA	1.3	1.2	1.25	0.0707107	0.321928
YBR053C	YBR053C		DMA	1.2	1.1	1.15	0.0707107	0.201634
YBR054W	YRO2		DMA	1.1	1.3	1.2	0.141421	0.263034
YBR055C	PRP6	prp6-ts	TSv6	1.41084	1.30908	1.35996	0.0719585	0.443563
YBR055C	PRP6	prp6-1	TSv6	2.2653	1.74763	2.00646	0.366046	1.00466
YBR056W	YBR056W		DMA	1.1	0.8	0.95	0.212132	-0.0740006
YBR057C	MUM2		DMA	0.9	0.9	0.9	0	-0.152003
YBR058C	UBP14		DMA	1	1	1	0	0
YBR058C-A	TSC3	tsc3-2	TSv6	1.07245	1.11183	1.09214	0.0278458	0.127161
YBR059C	AKL1		DMA	0.9	1	0.95	0.0707107	-0.0740006
YBR060C	ORC2	orc2-4	TSv6	0.772955	0.886234	0.829594	0.0801003	-0.269522		1
YBR060C	ORC2	orc2-2	TSv6	1.21718	1.10907	1.16313	0.0764415	0.218008		1
YBR060C	ORC2	orc2-3	TSv6	1.24658	1.34999	1.29829	0.0731154	0.376607
YBR060C	ORC2	orc2-1	TSv6	1.18989	1.55887	1.37438	0.260907	0.458777		1
YBR061C	TRM7		DMA	0.6	0.4	0.5	0.141421	-1
YBR061C	TRM7		DMA	1.1	0.9	1	0.141421	0
YBR062C	YBR062C		DMA	1.1	1.3	1.2	0.141421	0.263034
YBR063C	YBR063C		DMA	1.1	1.6	1.35	0.353553	0.432959
YBR064W	YBR064W		DMA	1.1	1.3	1.2	0.141421	0.263034
YBR065C	ECM2		DMA	1	1.5	1.25	0.353553	0.321928
YBR066C	NRG2		DMA	1.2	1.2	1.2	0	0.263034
YBR067C	TIP1		DMA	1	1.2	1.1	0.141421	0.137504
YBR068C	BAP2		DMA	1.1	1	1.05	0.0707107	0.0703893
YBR069C	TAT1		DMA	1.1	1.2	1.15	0.0707107	0.201634
YBR070C	ALG14	alg14-ph	TSv6	1.06017	1.02082	1.04049	0.0278311	0.05727
YBR071W	YBR071W		DMA	1	1	1	0	0
YBR072W	HSP26		DMA	1.5	1.3	1.4	0.141421	0.485427
YBR073W	RDH54		DMA	1.1	1.1	1.1	0	0.137504
YBR074W	PFF1		DMA	1.2	1.3	1.25	0.0707107	0.321928
YBR075W	YBR075W		DMA	1	1.2	1.1	0.141421	0.137504
YBR075W	YBR075W		DMA	1.2	1.3	1.25	0.0707107	0.321928
YBR076W	ECM8		DMA	1	0.9	0.95	0.0707107	-0.0740006
YBR077C	SLM4		DMA	1.3	1.5	1.4	0.141421	0.485427
YBR078W	ECM33		DMA	1.3	1.2	1.25	0.0707107	0.321928
YBR079C	RPG1	rpg1-1	TSv6	1.33351	1.18925	1.26138	0.102006	0.335005
YBR079C	RPG1	rpg1-ph	TSv6	1.31155	1.27216	1.29186	0.0278489	0.369445
YBR080C	SEC18	sec18-1	TSv6	0.927366	0.971807	0.949586	0.0314249	-0.0746287
YBR082C	UBC4		DMA	1.3	1.2	1.25	0.0707107	0.321928
YBR082C	UBC4		DMA	1.4	1.2	1.3	0.141421	0.378512
YBR083W	TEC1		DMA	1.1	1.2	1.15	0.0707107	0.201634
YBR084C-A	RPL19A		DMA	0.8	0.6	0.7	0.141421	-0.514573	1
YBR084W	MIS1		DMA	1	1	1	0	0
YBR085W	AAC3		DMA	1.1	1.2	1.15	0.0707107	0.201634
YBR086C	IST2		DMA	1	1.2	1.1	0.141421	0.137504
YBR087W	RFC5	rfc5-1	TSv6	1.39095	1.11413	1.25254	0.195747	0.324858
YBR089C-A	NHP6B		DMA	1.2	1.6	1.4	0.282843	0.485427
YBR090C	YBR090C		DMA	1	1.1	1.05	0.0707107	0.0703893
YBR092C	PHO3		DMA	1	1.1	1.05	0.0707107	0.0703893
YBR093C	PHO5		DMA	0.6	0.7	0.65	0.0707107	-0.621488
YBR094W	PBY1		DMA	1.1	1	1.05	0.0707107	0.0703893
YBR095C	RXT2		DMA	0.8	0.8	0.8	0	-0.321928
YBR095C	RXT2		DMA	0.9	0.9	0.9	0	-0.152003
YBR098W	MMS4		DMA	1	1.2	1.1	0.141421	0.137504
YBR099C	YBR099C		DMA	1	0.9	0.95	0.0707107	-0.0740006
YBR100W	YBR100W		DMA	1	1	1	0	0
YBR101C	FES1		DMA	1	1	1	0	0
YBR102C	EXO84	exo84-102	TSv6	1.02197	0.988679	1.00532	0.0235368	0.00765804
YBR103W	SIF2		DMA	0.7	0.7	0.7	0	-0.514573
YBR104W	YMC2		DMA	0.9	0.9	0.9	0	-0.152003
YBR105C	VID24		DMA	1.3	1.5	1.4	0.141421	0.485427
YBR106W	PHO88		DMA	0.2	0.3	0.25	0.0707107	-2
YBR107C	IML3		DMA	1.1	1.1	1.1	0	0.137504
YBR108W	AIM3		DMA	1.6	1.5	1.55	0.0707107	0.632268
YBR109C	CMD1	cmd1-1	TSv6	0.792733	0.871461	0.832097	0.0556697	-0.265177
YBR109C	CMD1	cmd1-3	TSv6	0.883001	0.953114	0.918057	0.0495773	-0.123344		1
YBR109C	CMD1	cmd1-8	TSv6	1.28657	1.45824	1.3724	0.121391	0.456704
YBR110W	ALG1	alg1-1	TSv6	1.33302	1.29485	1.31393	0.0269887	0.39389
YBR111C	YSA1		DMA	1.2	1.2	1.2	0	0.263034
YBR113W	YBR113W		DMA	1	1.2	1.1	0.141421	0.137504
YBR114W	RAD16		DMA	1	1.1	1.05	0.0707107	0.0703893
YBR115C	LYS2		DMA	0.4	0.3	0.35	0.0707107	-1.51457
YBR115C	LYS2		DMA	0.4	0.4	0.4	0	-1.32193
YBR116C	YBR116C		DMA	1	1	1	0	0
YBR118W	TEF2		DMA	0.9	1.1	1	0.141421	0
YBR119W	MUD1		DMA	0.9	0.9	0.9	0	-0.152003
YBR121C	GRS1		DMA	0.9	1	0.95	0.0707107	-0.0740006
YBR121C	GRS1	grs1-ph	TSv6	1.14849	1.31951	1.234	0.120927	0.303341
YBR122C	MRPL36		DMA	0.9	1.2	1.05	0.212132	0.0703893
YBR123C	TFC1	tfc1-e447k	TSv6	1.83681	1.54052	1.68867	0.209514	0.755884
YBR125C	PTC4		DMA	1	1.1	1.05	0.0707107	0.0703893
YBR126C	TPS1		DMA	0.5	0.7	0.6	0.141421	-0.736966	1
YBR126C	TPS1	tps1-supp1	TSv6	1.06079	1.22311	1.14195	0.114781	0.191499
YBR128C	ATG14		DMA	1.3	1.1	1.2	0.141421	0.263034
YBR129C	OPY1		DMA	1.1	1	1.05	0.0707107	0.0703893
YBR130C	SHE3		DMA	1	1	1	0	0
YBR131W	CCZ1		DMA	0.9	1	0.95	0.0707107	-0.0740006
YBR132C	AGP2		DMA	1.1	1	1.05	0.0707107	0.0703893
YBR134W	YBR134W		DMA	1	0.9	0.95	0.0707107	-0.0740006
YBR135W	CKS1	cks1-38	TSv6	0.734219	0.804742	0.76948	0.0498675	-0.378043
YBR135W	CKS1	cks1-35	TSv6	1.49341	1.60397	1.54869	0.0781759	0.631051
YBR137W	YBR137W		DMA	1.2	1.1	1.15	0.0707107	0.201634		1
YBR138C	YBR138C		DMA	1	1.1	1.05	0.0707107	0.0703893
YBR139W	YBR139W		DMA	1	0.9	0.95	0.0707107	-0.0740006
YBR141C	BMT2		DMA	1	0.9	0.95	0.0707107	-0.0740006
YBR142W	MAK5	mak5-ph	TSv6	0.891994	0.981281	0.936638	0.0631359	-0.0944371
YBR143C	SUP45	sup45-ts	TSv6	0.976455	0.905048	0.940752	0.0504927	-0.0881141
YBR144C	YBR144C		DMA	1.2	1.1	1.15	0.0707107	0.201634
YBR145W	ADH5		DMA	1.1	1.4	1.25	0.212132	0.321928
YBR146W	MRPS9		DMA	0.9	0.8	0.85	0.0707107	-0.234465
YBR147W	RTC2		DMA	1	0.9	0.95	0.0707107	-0.0740006
YBR148W	YSW1		DMA	1	1.1	1.05	0.0707107	0.0703893
YBR149W	ARA1		DMA	1	1	1	0	0
YBR150C	TBS1		DMA	1	1.1	1.05	0.0707107	0.0703893
YBR151W	APD1		DMA	1	1	1	0	0
YBR152W	SPP381	spp381-ph	TSv6	1.33042	1.35307	1.34174	0.0160136	0.424109
YBR153W	RIB7	rib7-ph	TSv6	1.49392	1.52132	1.50762	0.0193754	0.592272
YBR154C	RPB5	rpb5-ph	TSv6	0.90856	1.0488	0.978682	0.099168	-0.0310878
YBR154C	RPB5	rpb5-h147r	TSv6	1.20626	1.29495	1.25061	0.0627108	0.322628
YBR155W	CNS1	cns1-1	TSv6	0.138133	0.273668	0.205901	0.0958382	-2.27998
YBR156C	SLI15		DMA	1	0.9	0.95	0.0707107	-0.0740006		1
YBR156C	SLI15	sli15-3	TSv6	1.36824	1.41571	1.39197	0.0335649	0.477133		1
YBR157C	ICS2		DMA	1	1.4	1.2	0.282843	0.263034
YBR158W	AMN1		DMA	1.1	1.1	1.1	0	0.137504
YBR159W	IFA38		DMA	1.4	1.1	1.25	0.212132	0.321928
YBR160W	CDC28	cdc28-td	TSv6	0.178508	0.460902	0.319705	0.199683	-1.64519
YBR160W	CDC28	cdc28-4	TSv6	0.964623	0.993966	0.979294	0.0207489	-0.0301856	1
YBR160W	CDC28	cdc28-13	TSv6	1.0806	1.01664	1.04862	0.0452313	0.0684928
YBR160W	CDC28	cdc28-1	TSv6	1.05027	1.0614	1.05584	0.00786697	0.0783875
YBR161W	CSH1		DMA	1	1	1	0	0
YBR162C	TOS1		DMA	1.3	1.3	1.3	0	0.378512
YBR162W-A	YSY6		DMA	1	1.2	1.1	0.141421	0.137504
YBR164C	ARL1		DMA	1.1	0.9	1	0.141421	0
YBR165W	UBS1		DMA	1	1.1	1.05	0.0707107	0.0703893
YBR165W	UBS1		DMA	1.3	1.2	1.25	0.0707107	0.321928
YBR166C	TYR1		DMA	1	1	1	0	0
YBR167C	POP7	pop7-ph	TSv6	1.6577	1.38314	1.52042	0.194145	0.604472
YBR168W	PEX32		DMA	0.9	0.9	0.9	0	-0.152003
YBR169C	SSE2		DMA	1.1	1.3	1.2	0.141421	0.263034
YBR170C	NPL4		DMA	0.6	0.7	0.65	0.0707107	-0.621488
YBR171W	SEC66		DMA	0.9	0.9	0.9	0	-0.152003
YBR172C	SMY2		DMA	1.2	1.1	1.15	0.0707107	0.201634
YBR174C	YBR174C		DMA	1.1	1	1.05	0.0707107	0.0703893
YBR175W	SWD3		DMA	1.2	1	1.1	0.141421	0.137504
YBR176W	ECM31		DMA	1.1	1.1	1.1	0	0.137504
YBR177C	EHT1		DMA	1.1	1.2	1.15	0.0707107	0.201634
YBR178W	YBR178W		DMA	1	1.3	1.15	0.212132	0.201634
YBR180W	DTR1		DMA	1.2	1.1	1.15	0.0707107	0.201634
YBR181C	RPS6B		DMA	0.7	0.7	0.7	0	-0.514573
YBR182C	SMP1		DMA	1	1.2	1.1	0.141421	0.137504
YBR183W	YPC1		DMA	1.3	1.1	1.2	0.141421	0.263034
YBR184W	YBR184W		DMA	1.1	1.1	1.1	0	0.137504
YBR185C	MBA1		DMA	1.1	1.1	1.1	0	0.137504
YBR186W	PCH2		DMA	1.2	1.4	1.3	0.141421	0.378512
YBR187W	GDT1		DMA	1.1	1.1	1.1	0	0.137504
YBR188C	NTC20		DMA	1.3	1.7	1.5	0.282843	0.584963
YBR189W	RPS9B		DMA	0.4	0.3	0.35	0.0707107	-1.51457
YBR193C	MED8	med8-51	TSv6	0.815483	0.961606	0.888544	0.103324	-0.170484
YBR193C	MED8	med8-39	TSv6	1.01908	0.987366	1.00322	0.0224277	0.0046446
YBR194W	AIM4		DMA	0.8	0.7	0.75	0.0707107	-0.415037		1
YBR195C	MSI1		DMA	1	1.1	1.05	0.0707107	0.0703893
YBR196C	PGI1	pgi1-2	TSv6	1.77051	1.77242	1.77147	0.00135638	0.824943
YBR197C	YBR197C		DMA	1.2	1.2	1.2	0	0.263034
YBR198C	TAF5	taf5-15	TSv6	1.0182	0.940512	0.979355	0.0549327	-0.0300962
YBR198C	TAF5	taf5-3	TSv6	1.14141	1.07201	1.10671	0.0490697	0.14628
YBR198C	TAF5	taf5-20	TSv6	1.2298	1.11567	1.17273	0.0807058	0.229874	1
YBR199W	KTR4		DMA	1	1	1	0	0
YBR200W	BEM1		DMA	0.7	0.8	0.75	0.0707107	-0.415037
YBR201W	DER1		DMA	1.3	1.5	1.4	0.141421	0.485427
YBR202W	MCM7	cdc47-ts	TSv6	0.523114	0.567733	0.545423	0.0315502	-0.874552		1
YBR203W	COS111		DMA	1.9	1.3	1.6	0.424264	0.678072
YBR204C	LDH1		DMA	1.1	1.1	1.1	0	0.137504
YBR205W	KTR3		DMA	1	1.1	1.05	0.0707107	0.0703893
YBR206W	YBR206W		DMA	1	1	1	0	0
YBR207W	FTH1		DMA	1.1	1.1	1.1	0	0.137504
YBR208C	DUR1,2		DMA	1.2	0.9	1.05	0.212132	0.0703893
YBR209W	YBR209W		DMA	0.9	0.9	0.9	0	-0.152003
YBR210W	ERV15		DMA	1	1.1	1.05	0.0707107	0.0703893
YBR211C	AME1	ame1-4	TSv6	1.35564	1.41461	1.38512	0.0416983	0.470016
YBR212W	NGR1		DMA	1.2	1	1.1	0.141421	0.137504
YBR213W	MET8		DMA	1.7	1.6	1.65	0.0707107	0.722466
YBR214W	SDS24		DMA	1.5	1.1	1.3	0.282843	0.378512
YBR215W	HPC2		DMA	1.7	1.5	1.6	0.141421	0.678072
YBR216C	YBP1		DMA	1.1	1.1	1.1	0	0.137504
YBR217W	ATG12		DMA	1	1.1	1.05	0.0707107	0.0703893
YBR218C	PYC2		DMA	1	1.1	1.05	0.0707107	0.0703893
YBR219C	YBR219C		DMA	1	1.1	1.05	0.0707107	0.0703893
YBR220C	YBR220C		DMA	1.1	1	1.05	0.0707107	0.0703893
YBR221C	PDB1		DMA	0.9	0.9	0.9	0	-0.152003
YBR222C	PCS60		DMA	1	1	1	0	0
YBR223C	TDP1		DMA	0.9	1	0.95	0.0707107	-0.0740006
YBR224W	YBR224W		DMA	0.8	0.8	0.8	0	-0.321928
YBR225W	YBR225W		DMA	1	1.2	1.1	0.141421	0.137504
YBR226C	YBR226C		DMA	1.4	1.1	1.25	0.212132	0.321928
YBR227C	MCX1		DMA	1.2	1	1.1	0.141421	0.137504
YBR228W	SLX1		DMA	1.4	1.8	1.6	0.282843	0.678072
YBR229C	ROT2		DMA	1.1	0.9	1	0.141421	0
YBR230C	OM14		DMA	1.4	1.1	1.25	0.212132	0.321928
YBR231C	SWC5		DMA	0.4	0.4	0.4	0	-1.32193
YBR232C	YBR232C		DMA	1	1.2	1.1	0.141421	0.137504
YBR233W	PBP2		DMA	1.1	1.1	1.1	0	0.137504
YBR234C	ARC40	arc40-ph	TSv6	1.63069	1.35643	1.49356	0.193933	0.578758
YBR235W	VHC1		DMA	1.2	1	1.1	0.141421	0.137504
YBR236C	ABD1	abd1-5	TSv6	0.933577	0.992047	0.962812	0.0413445	-0.0546736
YBR236C	ABD1	abd1-8	TSv6	1.52034	1.46278	1.49156	0.0407025	0.576819
YBR237W	PRP5	prp5-1	TSv6	0.970115	1.01744	0.993779	0.033466	-0.0090026
YBR238C	YBR238C		DMA	1	0.9	0.95	0.0707107	-0.0740006
YBR239C	ERT1		DMA	1	1.1	1.05	0.0707107	0.0703893
YBR240C	THI2		DMA	1.1	1.1	1.1	0	0.137504
YBR241C	YBR241C		DMA	1.2	1.2	1.2	0	0.263034
YBR242W	YBR242W		DMA	2.1	1.7	1.9	0.282843	0.925999
YBR244W	GPX2		DMA	1.2	1.1	1.15	0.0707107	0.201634
YBR245C	ISW1		DMA	0.9	1	0.95	0.0707107	-0.0740006
YBR246W	RRT2		DMA	1.3	1	1.15	0.212132	0.201634
YBR247C	ENP1	enp1-1	TSv6	1.32918	1.19502	1.2621	0.094869	0.335824
YBR248C	HIS7		DMA	0.4	0.4	0.4	0	-1.32193
YBR249C	ARO4		DMA	1.1	1.1	1.1	0	0.137504
YBR250W	SPO23		DMA	1.2	1	1.1	0.141421	0.137504
YBR253W	SRB6	srb6-ph	TSv6	1.19834	1.09383	1.14608	0.0738976	0.19671
YBR254C	TRS20	trs20-ph	TSv6	1.00841	0.988981	0.998694	0.0137369	-0.0018851
YBR255W	MTC4		DMA	1.1	1.1	1.1	0	0.137504	1
YBR257W	POP4	pop4-ph	TSv6	0.472081	0.48368	0.47788	0.00820162	-1.06528
YBR258C	SHG1		DMA	1	1.1	1.05	0.0707107	0.0703893
YBR259W	YBR259W		DMA	1	1	1	0	0
YBR260C	RGD1		DMA	1.3	1.2	1.25	0.0707107	0.321928
YBR261C	TAE1		DMA	1.2	0.2	0.7	0.707107	-0.514573
YBR262C	MIC12		DMA	0.9	1	0.95	0.0707107	-0.0740006
YBR263W	SHM1		DMA	1	1.2	1.1	0.141421	0.137504
YBR264C	YPT10		DMA	1	1.1	1.05	0.0707107	0.0703893
YBR265W	TSC10	tsc10-1	TSv6	1.43962	1.49179	1.4657	0.036889	0.551591
YBR266C	SLM6		DMA	0.6	0.6	0.6	0	-0.736966
YBR267W	REI1		DMA	0.5	0.5	0.5	0	-1
YBR269C	SDH8		DMA	1.3	1	1.15	0.212132	0.201634
YBR270C	BIT2		DMA	1.4	1.2	1.3	0.141421	0.378512
YBR271W	EFM2		DMA	1.3	1.1	1.2	0.141421	0.263034
YBR272C	HSM3		DMA	1.2	1	1.1	0.141421	0.137504
YBR273C	UBX7		DMA	1.3	1.4	1.35	0.0707107	0.432959
YBR274W	CHK1		DMA	1.1	1.6	1.35	0.353553	0.432959
YBR275C	RIF1		DMA	1	0.9	0.95	0.0707107	-0.0740006
YBR276C	PPS1		DMA	1.1	1.1	1.1	0	0.137504
YBR277C	YBR277C		DMA	1	1.1	1.05	0.0707107	0.0703893
YBR278W	DPB3		DMA	1.1	1	1.05	0.0707107	0.0703893
YBR280C	SAF1		DMA	1.1	1.1	1.1	0	0.137504
YBR281C	DUG2		DMA	1	1.2	1.1	0.141421	0.137504
YBR283C	SSH1		DMA	1.1	1.3	1.2	0.141421	0.263034
YBR284W	YBR284W		DMA	1	1.4	1.2	0.282843	0.263034
YBR285W	YBR285W		DMA	1.1	1.5	1.3	0.282843	0.378512
YBR286W	APE3		DMA	1.1	1.5	1.3	0.282843	0.378512
YBR287W	YBR287W		DMA	1.3	1	1.15	0.212132	0.201634
YBR288C	APM3		DMA	0.9	0.9	0.9	0	-0.152003
YBR289W	SNF5		DMA	0.6	0.5	0.55	0.0707107	-0.862496
YBR290W	BSD2		DMA	1.4	1	1.2	0.282843	0.263034
YBR291C	CTP1		DMA	1	1	1	0	0
YBR292C	YBR292C		DMA	1.1	1	1.05	0.0707107	0.0703893
YBR293W	VBA2		DMA	0.9	1.1	1	0.141421	0
YBR294W	SUL1		DMA	0.8	0.9	0.85	0.0707107	-0.234465
YBR295W	PCA1		DMA	1.6	1.8	1.7	0.141421	0.765535
YBR296C	PHO89		DMA	1.2	1.8	1.5	0.424264	0.584963
YBR297W	MAL33		DMA	1.5	1.6	1.55	0.0707107	0.632268
YBR298C	MAL31		DMA	1.2	1.1	1.15	0.0707107	0.201634
YBR299W	MAL32		DMA	1.3	1.2	1.25	0.0707107	0.321928
YBR300C	YBR300C		DMA	1	1.1	1.05	0.0707107	0.0703893
YBR301W	PAU24		DMA	1.1	1	1.05	0.0707107	0.0703893
YCL001W	RER1		DMA	1.2	1.2	1.2	0	0.263034
YCL001W-A	YCL001W-A		DMA	1.6	1.1	1.35	0.353553	0.432959
YCL002C	YCL002C		DMA	1	1	1	0	0
YCL004W	PGS1	ycl004w-ph	TSv6	1.53597	0.9672	1.25158	0.402178	0.323754
YCL006C	YCL006C		DMA	1.1	1.1	1.1	0	0.137504
YCL009C	ILV6		DMA	1.2	1.2	1.2	0	0.263034
YCL010C	SGF29		DMA	1.1	1	1.05	0.0707107	0.0703893
YCL011C	GBP2		DMA	1.2	1.1	1.15	0.0707107	0.201634
YCL012W	YCL012W		DMA	1.1	1	1.05	0.0707107	0.0703893
YCL013W	YCL013W		DMA	1.1	1.1	1.1	0	0.137504
YCL014W	BUD3		DMA	1.2	1	1.1	0.141421	0.137504
YCL016C	DCC1		DMA	0.9	1	0.95	0.0707107	-0.0740006
YCL022C	YCL022C		DMA	1.1	1.1	1.1	0	0.137504
YCL023C	YCL023C		DMA	0.8	1	0.9	0.141421	-0.152003
YCL024W	KCC4		DMA	1	1.1	1.05	0.0707107	0.0703893
YCL025C	AGP1		DMA	1.2	1	1.1	0.141421	0.137504
YCL026C	YCL026C		DMA	1.2	1.3	1.25	0.0707107	0.321928
YCL026C-A	FRM2		DMA	0.9	1	0.95	0.0707107	-0.0740006
YCL027W	FUS1		DMA	2.1	1.8	1.95	0.212132	0.963474
YCL028W	RNQ1		DMA	1.1	1.3	1.2	0.141421	0.263034
YCL029C	BIK1		DMA	1.3	1.3	1.3	0	0.378512
YCL030C	HIS4		DMA	0.3	0.3	0.3	0	-1.73697
YCL032W	STE50		DMA	0.9	0.9	0.9	0	-0.152003
YCL033C	MXR2		DMA	1.1	1.1	1.1	0	0.137504
YCL034W	LSB5		DMA	1.2	1.1	1.15	0.0707107	0.201634
YCL035C	GRX1		DMA	1.1	1.2	1.15	0.0707107	0.201634
YCL036W	GFD2		DMA	1.5	1.1	1.3	0.282843	0.378512
YCL037C	SRO9		DMA	0.9	0.9	0.9	0	-0.152003	1
YCL038C	ATG22		DMA	1	1.1	1.05	0.0707107	0.0703893
YCL039W	GID7		DMA	1.7	0.9	1.3	0.565685	0.378512
YCL040W	GLK1		DMA	1.5	1.1	1.3	0.282843	0.378512
YCL042W	YCL042W		DMA	1.2	1.1	1.15	0.0707107	0.201634
YCL044C	MGR1		DMA	1	1	1	0	0
YCL045C	EMC1		DMA	0.9	0.9	0.9	0	-0.152003
YCL046W	YCL046W		DMA	1	1.1	1.05	0.0707107	0.0703893
YCL047C	POF1		DMA	1.1	1.2	1.15	0.0707107	0.201634
YCL048W	SPS22		DMA	1.3	1.1	1.2	0.141421	0.263034
YCL049C	YCL049C		DMA	1.1	1	1.05	0.0707107	0.0703893
YCL050C	APA1		DMA	1.2	1.3	1.25	0.0707107	0.321928
YCL051W	LRE1		DMA	1.8	2	1.9	0.141421	0.925999
YCL052C	PBN1	pbn1-ph	TSv6	1.21228	1.17663	1.19446	0.0252122	0.256353
YCL055W	KAR4		DMA	0.9	0.9	0.9	0	-0.152003
YCL056C	PEX34		DMA	1.2	1.1	1.15	0.0707107	0.201634
YCL057W	PRD1		DMA	1.1	1.1	1.1	0	0.137504
YCL059C	KRR1	krr1-18	TSv6	1.0484	1.12416	1.08628	0.0535768	0.119396
YCL059C	KRR1	krr1-17	TSv6	1.39557	1.43699	1.41628	0.0292923	0.502105
YCL060C	YCL060C		DMA	1	0.9	0.95	0.0707107	-0.0740006
YCL061C	MRC1		DMA	0.8	0.9	0.85	0.0707107	-0.234465
YCL062W	YCL062W		DMA	1	1	1	0	0
YCL063W	VAC17		DMA	1.2	1.1	1.15	0.0707107	0.201634
YCL064C	CHA1		DMA	1.1	1	1.05	0.0707107	0.0703893
YCL069W	VBA3		DMA	0.9	0.9	0.9	0	-0.152003
YCL074W	YCL074W		DMA	1	1.2	1.1	0.141421	0.137504
YCL075W	YCL075W		DMA	1.3	1.1	1.2	0.141421	0.263034
YCL076W	YCL076W		DMA	1.2	1.1	1.15	0.0707107	0.201634
YCR001W	YCR001W		DMA	1.8	1.3	1.55	0.353553	0.632268
YCR002C	CDC10	cdc10-5	TSv6	0.621234	0.660501	0.640868	0.0277658	-0.641902
YCR002C	CDC10	cdc10-1	TSv6	1.16353	1.29688	1.2302	0.0942967	0.298898
YCR002C	CDC10	cdc10-4	TSv6	1.32031	1.325	1.32266	0.00332046	0.403438
YCR002C	CDC10	cdc10-2	TSv6	3.20514	2.91585	3.0605	0.204561	1.61377
YCR005C	CIT2		DMA	1.1	1	1.05	0.0707107	0.0703893
YCR006C	YCR006C		DMA	2.4	2	2.2	0.282843	1.1375
YCR007C	YCR007C		DMA	1.2	1.2	1.2	0	0.263034
YCR008W	SAT4		DMA	0.8	1	0.9	0.141421	-0.152003
YCR009C	RVS161		DMA	0.8	0.8	0.8	0	-0.321928
YCR010C	ADY2		DMA	1.2	1.3	1.25	0.0707107	0.321928
YCR011C	ADP1		DMA	1.5	1.1	1.3	0.282843	0.378512
YCR014C	POL4		DMA	1.4	1.8	1.6	0.282843	0.678072
YCR015C	CTO1		DMA	1.1	1.7	1.4	0.424264	0.485427
YCR016W	YCR016W		DMA	1.2	1.1	1.15	0.0707107	0.201634
YCR017C	CWH43		DMA	1.9	2	1.95	0.0707107	0.963474
YCR019W	MAK32		DMA	1.6	1.5	1.55	0.0707107	0.632268
YCR020C	PET18		DMA	1.3	1.3	1.3	0	0.378512
YCR020C-A	MAK31		DMA	1.2	1.1	1.15	0.0707107	0.201634
YCR021C	HSP30		DMA	1.4	1.7	1.55	0.212132	0.632268
YCR022C	YCR022C		DMA	1.2	1.3	1.25	0.0707107	0.321928
YCR023C	YCR023C		DMA	1.1	1.3	1.2	0.141421	0.263034
YCR024C-A	PMP1		DMA	1.3	1.1	1.2	0.141421	0.263034
YCR025C	YCR025C		DMA	1.8	1.5	1.65	0.212132	0.722466
YCR026C	NPP1		DMA	2	1.8	1.9	0.141421	0.925999
YCR027C	RHB1		DMA	2.4	2.3	2.35	0.0707107	1.23266
YCR028C-A	RIM1		DMA	0.6	0.6	0.6	0	-0.736966
YCR030C	SYP1		DMA	1.1	1.9	1.5	0.565685	0.584963
YCR031C	RPS14A		DMA	0.9	0.9	0.9	0	-0.152003
YCR032W	BPH1		DMA	1.4	1.2	1.3	0.141421	0.378512
YCR033W	SNT1		DMA	0.8	0.6	0.7	0.141421	-0.514573
YCR034W	ELO2		DMA	0.9	0.9	0.9	0	-0.152003
YCR036W	RBK1		DMA	1.1	1.6	1.35	0.353553	0.432959
YCR037C	PHO87		DMA	1.1	1.1	1.1	0	0.137504
YCR042C	TAF2	taf2-1	TSv6	1.21087	1.2859	1.24838	0.0530549	0.32006
YCR043C	YCR043C		DMA	1.6	1.9	1.75	0.212132	0.807355
YCR044C	PER1		DMA	1.2	1.4	1.3	0.141421	0.378512
YCR045C	RRT12		DMA	1.7	1.9	1.8	0.141421	0.847997
YCR048W	ARE1		DMA	1.3	1.2	1.25	0.0707107	0.321928
YCR049C	YCR049C		DMA	1.2	1.2	1.2	0	0.263034
YCR050C	YCR050C		DMA	1.1	1.1	1.1	0	0.137504
YCR051W	YCR051W		DMA	1.2	1.2	1.2	0	0.263034
YCR052W	RSC6	rsc6-ph	TSv6	1.69455	1.83289	1.76372	0.0978231	0.818622
YCR053W	THR4		DMA	0.7	0.7	0.7	0	-0.514573
YCR059C	YIH1		DMA	1.1	1.1	1.1	0	0.137504
YCR060W	TAH1		DMA	1	1	1	0	0
YCR061W	YCR061W		DMA	1.3	1.3	1.3	0	0.378512
YCR062W	YCR062W		DMA	1.3	1.1	1.2	0.141421	0.263034
YCR063W	BUD31		DMA	0.6	0.6	0.6	0	-0.736966
YCR065W	HCM1		DMA	1.1	1.1	1.1	0	0.137504
YCR067C	SED4		DMA	1.1	1.6	1.35	0.353553	0.432959
YCR068W	ATG15		DMA	1.8	1.2	1.5	0.424264	0.584963
YCR069W	CPR4		DMA	1	2	1.5	0.707107	0.584963
YCR071C	IMG2		DMA	0.6	0.6	0.6	0	-0.736966
YCR073C	SSK22		DMA	1.3	1.3	1.3	0	0.378512
YCR073W-A	SOL2		DMA	1.1	1.1	1.1	0	0.137504
YCR075C	ERS1		DMA	1.2	1.2	1.2	0	0.263034
YCR076C	FUB1		DMA	1.2	1.3	1.25	0.0707107	0.321928
YCR077C	PAT1		DMA	0.7	0.7	0.7	0	-0.514573
YCR079W	PTC6		DMA	0.9	1.1	1	0.141421	0	1
YCR081W	SRB8		DMA	0.8	0.8	0.8	0	-0.321928
YCR082W	AHC2		DMA	1	1.1	1.05	0.0707107	0.0703893
YCR083W	TRX3		DMA	1.9	1.1	1.5	0.565685	0.584963
YCR085W	YCR085W		DMA	1	1.6	1.3	0.424264	0.378512
YCR086W	CSM1		DMA	0.9	0.8	0.85	0.0707107	-0.234465
YCR087C-A	YCR087C-A		DMA	1.5	1.4	1.45	0.0707107	0.536053
YCR087W	YCR087W		DMA	1.2	1.3	1.25	0.0707107	0.321928
YCR088W	ABP1		DMA	1	1.1	1.05	0.0707107	0.0703893
YCR089W	FIG2		DMA	1.2	1.4	1.3	0.141421	0.378512
YCR090C	YCR090C		DMA	1.1	1.5	1.3	0.282843	0.378512
YCR091W	KIN82		DMA	1	1	1	0	0
YCR092C	MSH3		DMA	1.1	1.1	1.1	0	0.137504
YCR093W	CDC39	cdc39-1	TSv6	1.32044	1.28742	1.30393	0.0233474	0.382868
YCR095C	OCA4		DMA	1.6	1	1.3	0.424264	0.378512
YCR098C	GIT1		DMA	1.2	1.7	1.45	0.353553	0.536053
YCR099C	YCR099C		DMA	1.2	1.2	1.2	0	0.263034
YCR100C	YCR100C		DMA	1.1	1.1	1.1	0	0.137504
YCR101C	YCR101C		DMA	1.4	1.1	1.25	0.212132	0.321928
YCR102C	YCR102C		DMA	1.3	1.3	1.3	0	0.378512
YCR102W-A	YCR102W-A		DMA	1	1.2	1.1	0.141421	0.137504
YCR105W	ADH7		DMA	1.2	1.3	1.25	0.0707107	0.321928
YCR106W	RDS1		DMA	1	1.3	1.15	0.212132	0.201634
YCR107W	AAD3		DMA	1.1	1.3	1.2	0.141421	0.263034
YDL001W	RMD1		DMA	1	0.9	0.95	0.0707107	-0.0740006
YDL002C	NHP10		DMA	0.9	1	0.95	0.0707107	-0.0740006
YDL003W	MCD1	mcd1-73	TSv6	1.5366	1.40191	1.46926	0.0952359	0.555087
YDL003W	MCD1	ydl003w-ph	TSv6	1.75611	1.96173	1.85892	0.145395	0.894465
YDL006W	PTC1		DMA	0.6	0.6	0.6	0	-0.736966
YDL007W	RPT2	rpt2-rf	TSv6	1.23986	1.44024	1.34005	0.141688	0.422285
YDL008W	APC11	apc11-22	TSv6	0.554081	0.436952	0.495516	0.0828228	-1.013
YDL008W	APC11	apc11-13	TSv6	0.905906	0.781956	0.843931	0.0876456	-0.244804
YDL010W	GRX6		DMA	1	0.9	0.95	0.0707107	-0.0740006
YDL011C	YDL011C		DMA	1.4	1	1.2	0.282843	0.263034
YDL012C	YDL012C		DMA	1.3	1.2	1.25	0.0707107	0.321928
YDL013W	SLX5		DMA	0.5	0.5	0.5	0	-1
YDL014W	NOP1	nop1-2	TSv6	0.210333	0.135468	0.1729	0.0529377	-2.53199
YDL014W	NOP1	nop1-3	TSv6	1.52144	1.39799	1.45972	0.0872882	0.545688
YDL015C	TSC13	tsc13-ph	TSv6	0.81507	0.753205	0.784138	0.0437448	-0.350821
YDL017W	CDC7	cdc7-4	TSv6	0.99051	1.20871	1.09961	0.154292	0.136993
YDL017W	CDC7	cdc7-1	TSv6	1.16773	1.14442	1.15607	0.0164824	0.209233
YDL018C	ERP3		DMA	1.1	1	1.05	0.0707107	0.0703893
YDL019C	OSH2		DMA	1.1	1	1.05	0.0707107	0.0703893
YDL020C	RPN4		DMA	0.8	0.7	0.75	0.0707107	-0.415037	1
YDL023C	YDL023C		DMA	1.4	1.4	1.4	0	0.485427
YDL024C	DIA3		DMA	1.1	1	1.05	0.0707107	0.0703893
YDL025C	RTK1		DMA	1.4	1.2	1.3	0.141421	0.378512
YDL026W	YDL026W		DMA	1.5	1.4	1.45	0.0707107	0.536053
YDL027C	MRX9		DMA	1.2	1.1	1.15	0.0707107	0.201634
YDL028C	MPS1	mps1-1	TSv6	0.310119	0.155935	0.233027	0.109025	-2.10143
YDL028C	MPS1	mps1-6	TSv6	0.295205	0.338354	0.316779	0.0305108	-1.65845
YDL028C	MPS1	mps1-417	TSv6	1.19833	1.15477	1.17655	0.0308002	0.23456
YDL028C	MPS1	mps1-3796	TSv6	1.31549	1.31259	1.31404	0.00204877	0.394012
YDL029W	ARP2	arp2-14	TSv6	1.14844	1.08707	1.11776	0.0433954	0.160607
YDL030W	PRP9	prp9-ts	TSv6	0.518181	0.551275	0.534728	0.0234009	-0.903122
YDL030W	PRP9	prp9-1	TSv6	0.232025	0.949983	0.591004	0.507673	-0.75876
YDL033C	SLM3		DMA	0.6	0.6	0.6	0	-0.736966
YDL034W	YDL034W		DMA	1.2	1.5	1.35	0.212132	0.432959
YDL035C	GPR1		DMA	1.2	1.1	1.15	0.0707107	0.201634
YDL036C	PUS9		DMA	1	1	1	0	0
YDL037C	BSC1		DMA	1.2	1.2	1.2	0	0.263034
YDL038C	YDL038C		DMA	1.1	1.1	1.1	0	0.137504
YDL039C	PRM7		DMA	1.7	1	1.35	0.494975	0.432959
YDL040C	NAT1		DMA	1.2	1.4	1.3	0.141421	0.378512
YDL041W	YDL041W		DMA	0.2	0.2	0.2	0	-2.32193
YDL042C	SIR2		DMA	0.2	0.2	0.2	0	-2.32193
YDL043C	PRP11	prp11-ts	TSv6	1.09956	1.1813	1.14043	0.0577969	0.189579
YDL045C	FAD1	fad1-ph	TSv6	1.29654	1.2843	1.29042	0.00865654	0.367837
YDL046W	NPC2		DMA	1.2	1.2	1.2	0	0.263034
YDL048C	STP4		DMA	0.8	1.1	0.95	0.212132	-0.0740006
YDL050C	YDL050C		DMA	1.1	1.2	1.15	0.0707107	0.201634
YDL051W	LHP1		DMA	1.7	0.9	1.3	0.565685	0.378512
YDL052C	SLC1		DMA	1	1.2	1.1	0.141421	0.137504
YDL053C	PBP4		DMA	0.9	0.9	0.9	0	-0.152003
YDL054C	MCH1		DMA	1	1	1	0	0
YDL056W	MBP1		DMA	1.4	1.4	1.4	0	0.485427
YDL058W	USO1	uso1-1	TSv6	1.17934	1.1634	1.17137	0.0112758	0.228197
YDL059C	RAD59		DMA	1.2	1.1	1.15	0.0707107	0.201634
YDL061C	RPS29B		DMA	0.7	0.6	0.65	0.0707107	-0.621488
YDL062W	YDL062W		DMA	0.8	0.8	0.8	0	-0.321928
YDL064W	UBC9	ubc9-2	TSv6	1.31502	1.2628	1.28891	0.036924	0.366147
YDL065C	PEX19		DMA	0.8	0.9	0.85	0.0707107	-0.234465
YDL066W	IDP1		DMA	1.1	1.1	1.1	0	0.137504
YDL070W	BDF2		DMA	0.8	0.9	0.85	0.0707107	-0.234465
YDL071C	YDL071C		DMA	0.9	1	0.95	0.0707107	-0.0740006
YDL074C	BRE1		DMA	0.6	0.6	0.6	0	-0.736966
YDL074C	BRE1		DMA	0.6	0.7	0.65	0.0707107	-0.621488
YDL076C	RXT3		DMA	1	0.9	0.95	0.0707107	-0.0740006
YDL077C	VAM6		DMA	0.8	0.9	0.85	0.0707107	-0.234465	1
YDL078C	MDH3		DMA	0.5	1.1	0.8	0.424264	-0.321928
YDL079C	MRK1		DMA	1.2	1.1	1.15	0.0707107	0.201634
YDL080C	THI3		DMA	0.8	0.8	0.8	0	-0.321928	1
YDL081C	RPP1A		DMA	0.7	0.6	0.65	0.0707107	-0.621488
YDL082W	RPL13A		DMA	0.8	0.7	0.75	0.0707107	-0.415037
YDL083C	RPS16B		DMA	0.6	0.6	0.6	0	-0.736966
YDL084W	SUB2	sub2-1	TSv6	1.43388	1.45016	1.44202	0.0115143	0.528093
YDL085W	NDE2		DMA	1.1	1.2	1.15	0.0707107	0.201634
YDL086W	YDL086W		DMA	1.3	1.1	1.2	0.141421	0.263034
YDL087C	LUC7	luc7-1	TSv6	1.67131	1.1734	1.42235	0.352075	0.50828
YDL088C	ASM4		DMA	0.9	1	0.95	0.0707107	-0.0740006
YDL089W	NUR1		DMA	1.2	1.6	1.4	0.282843	0.485427
YDL090C	RAM1		DMA	0.3	0.2	0.25	0.0707107	-2
YDL090C	RAM1	ram1-119	TSv6	0.883143	0.795047	0.839095	0.0622933	-0.253093
YDL091C	UBX3		DMA	1	1	1	0	0
YDL093W	PMT5		DMA	1.7	1.2	1.45	0.353553	0.536053
YDL094C	YDL094C		DMA	1.2	1	1.1	0.141421	0.137504
YDL095W	PMT1		DMA	1.3	1.1	1.2	0.141421	0.263034
YDL096C	OPI6		DMA	1	1.1	1.05	0.0707107	0.0703893
YDL097C	RPN6	rpn6-ph	TSv6	1.07832	1.08052	1.07942	0.00156154	0.110257
YDL097C	RPN6	rpn6-1	TSv6	1.17936	1.19371	1.18654	0.0101422	0.246756
YDL098C	SNU23	snu23-ph	TSv6	1.48517	1.41315	1.44916	0.0509267	0.535219
YDL099W	BUG1		DMA	1	1.1	1.05	0.0707107	0.0703893
YDL100C	GET3		DMA	0.9	1	0.95	0.0707107	-0.0740006
YDL102W	POL3	cdc2-7	TSv6	0.856764	0.926049	0.891407	0.0489924	-0.165844	1
YDL102W	POL3	cdc2-1	TSv6	1.17257	1.31695	1.24476	0.102089	0.315865
YDL102W	POL3	cdc2-2	TSv6	1.39973	1.35608	1.3779	0.0308657	0.462476
YDL103C	QRI1	qri1-ph	TSv6	0.482626	0.672961	0.577793	0.134587	-0.791375
YDL103C	QRI1	qri1-ts6	TSv6	1.05662	1.02407	1.04034	0.0230191	0.0570584
YDL103C	QRI1	qri1-ts1	TSv6	1.29522	1.18737	1.24129	0.0762642	0.311844
YDL104C	QRI7		DMA	1	1.1	1.05	0.0707107	0.0703893
YDL105W	NSE4	nse4-ts2	TSv6	0.619705	0.618345	0.619025	0.000961693	-0.69193	1
YDL105W	NSE4	nse4-ph	TSv6	0.536825	0.776438	0.656632	0.169432	-0.606844
YDL105W	NSE4	nse4-ts3	TSv6	0.945136	0.994143	0.969639	0.0346537	-0.0444797
YDL105W	NSE4	nse4-ts1	TSv6	0.905564	1.05192	0.978744	0.103491	-0.0309968
YDL105W	NSE4	nse4-ts4	TSv6	0.981939	1.01552	0.998727	0.0237425	-0.00183723
YDL106C	PHO2		DMA	0.9	1	0.95	0.0707107	-0.0740006
YDL108W	KIN28	kin28-ts	TSv6	0.490678	0.572128	0.531403	0.057594	-0.912121
YDL109C	YDL109C		DMA	1	1.2	1.1	0.141421	0.137504
YDL110C	TMA17		DMA	1.1	1	1.05	0.0707107	0.0703893
YDL111C	RRP42	rrp42-ph	TSv6	1.09724	0.952693	1.02497	0.102208	0.0355748
YDL112W	TRM3		DMA	1	1.2	1.1	0.141421	0.137504
YDL113C	ATG20		DMA	0.9	1.1	1	0.141421	0
YDL114W	YDL114W		DMA	1.4	1.1	1.25	0.212132	0.321928
YDL117W	CYK3		DMA	0.9	0.8	0.85	0.0707107	-0.234465
YDL118W	YDL118W		DMA	1	0.9	0.95	0.0707107	-0.0740006
YDL119C	HEM25		DMA	1	0.9	0.95	0.0707107	-0.0740006
YDL121C	YDL121C		DMA	0.9	1	0.95	0.0707107	-0.0740006
YDL122W	UBP1		DMA	1	1.1	1.05	0.0707107	0.0703893
YDL123W	SNA4		DMA	1.2	1.2	1.2	0	0.263034
YDL124W	YDL124W		DMA	1.6	1.2	1.4	0.282843	0.485427
YDL125C	HNT1		DMA	1.1	1	1.05	0.0707107	0.0703893
YDL126C	CDC48	cdc48-1	TSv6	0.473548	0.379959	0.426754	0.0661772	-1.22852
YDL126C	CDC48	cdc48-4601	TSv6	0.424607	0.495797	0.460202	0.050339	-1.11966	1
YDL126C	CDC48	cdc48-3	TSv6	1.05149	1.07442	1.06296	0.0162095	0.0880813
YDL126C	CDC48	cdc48-2	TSv6	1.12015	1.17107	1.14561	0.036003	0.196113
YDL126C	CDC48	cdc48-9	TSv6	1.19738	1.17222	1.1848	0.0177903	0.244646
YDL127W	PCL2		DMA	1.2	1.2	1.2	0	0.263034
YDL128W	VCX1		DMA	1	1.1	1.05	0.0707107	0.0703893
YDL129W	YDL129W		DMA	1.9	1.1	1.5	0.565685	0.584963
YDL130W	RPP1B		DMA	0.9	0.9	0.9	0	-0.152003
YDL130W-A	STF1		DMA	1.8	1.5	1.65	0.212132	0.722466
YDL131W	LYS21		DMA	1.1	1	1.05	0.0707107	0.0703893
YDL132W	CDC53	cdc53-1	TSv6	0.65247	0.647439	0.649955	0.00355752	-0.621589	1
YDL132W	CDC53	cdc53-1	TSv6	0.74084	0.719434	0.730137	0.0151362	-0.453761	1
YDL133C-A	RPL41B		DMA	1	1	1	0	0
YDL133C-A	RPL41B		DMA	1	1.1	1.05	0.0707107	0.0703893
YDL133W	SRF1		DMA	1.1	1.3	1.2	0.141421	0.263034
YDL134C	PPH21		DMA	1.4	1.4	1.4	0	0.485427
YDL135C	RDI1		DMA	1	1.2	1.1	0.141421	0.137504
YDL136W	RPL35B		DMA	0.9	1	0.95	0.0707107	-0.0740006
YDL137W	ARF2		DMA	1.3	1.3	1.3	0	0.378512
YDL138W	RGT2		DMA	1.6	1.3	1.45	0.212132	0.536053
YDL140C	RPO21	rpo21-1	TSv6	0.500995	0.613867	0.557431	0.0798126	-0.843134
YDL142C	CRD1		DMA	0.9	1	0.95	0.0707107	-0.0740006
YDL143W	CCT4	cct4-1	TSv6	0.464088	0.596947	0.530517	0.0939454	-0.914528
YDL144C	YDL144C		DMA	1.3	1.1	1.2	0.141421	0.263034
YDL145C	COP1	cop1-1	TSv6	1.43555	1.47252	1.45403	0.0261459	0.540061
YDL146W	LDB17		DMA	0.9	1.1	1	0.141421	0
YDL147W	RPN5	rpn5-1	TSv6	1.07846	1.23068	1.15457	0.107633	0.207355
YDL147W	RPN5	rpn5-ph	TSv6	1.18314	1.16866	1.1759	0.0102407	0.233761
YDL148C	NOP14	ydl148c-ph	TSv6	0.730384	0.801009	0.765696	0.0499398	-0.385156	1
YDL149W	ATG9		DMA	1	0.9	0.95	0.0707107	-0.0740006
YDL154W	MSH5		DMA	1.2	1.1	1.15	0.0707107	0.201634
YDL155W	CLB3		DMA	1.1	1.3	1.2	0.141421	0.263034
YDL156W	CMR1		DMA	1	0.9	0.95	0.0707107	-0.0740006
YDL157C	YDL157C		DMA	1	0.9	0.95	0.0707107	-0.0740006
YDL159W	STE7		DMA	0.2	0.3	0.25	0.0707107	-2
YDL160C	DHH1		DMA	0.2	0.2	0.2	0	-2.32193
YDL161W	ENT1		DMA	1.7	1.4	1.55	0.212132	0.632268
YDL162C	YDL162C		DMA	1.6	1.4	1.5	0.141421	0.584963
YDL164C	CDC9	cdc9-1	TSv6	1.13962	1.48105	1.31033	0.241428	0.389934
YDL165W	CDC36	cdc36-16	TSv6	1.26427	1.24255	1.25341	0.0153604	0.325859
YDL167C	NRP1		DMA	1.2	1.1	1.15	0.0707107	0.201634
YDL168W	SFA1		DMA	1.3	1	1.15	0.212132	0.201634
YDL169C	UGX2		DMA	1	0.9	0.95	0.0707107	-0.0740006
YDL170W	UGA3		DMA	1.2	0.9	1.05	0.212132	0.0703893
YDL171C	GLT1		DMA	1.2	1	1.1	0.141421	0.137504
YDL172C	YDL172C		DMA	1	1	1	0	0
YDL173W	PAR32		DMA	1	0.9	0.95	0.0707107	-0.0740006
YDL174C	DLD1		DMA	1.4	1.4	1.4	0	0.485427
YDL175C	AIR2		DMA	1	1.2	1.1	0.141421	0.137504
YDL176W	YDL176W		DMA	1.2	1	1.1	0.141421	0.137504
YDL177C	YDL177C		DMA	1.1	1.1	1.1	0	0.137504
YDL178W	DLD2		DMA	1.1	1.2	1.15	0.0707107	0.201634
YDL179W	PCL9		DMA	1.2	1.1	1.15	0.0707107	0.201634
YDL180W	YDL180W		DMA	0.7	1	0.85	0.212132	-0.234465
YDL181W	INH1		DMA	0.8	0.9	0.85	0.0707107	-0.234465
YDL182W	LYS20		DMA	0.8	0.6	0.7	0.141421	-0.514573
YDL183C	YDL183C		DMA	1	0.8	0.9	0.141421	-0.152003
YDL184C	RPL41A		DMA	1	1	1	0	0
YDL185W	VMA1		DMA	1.3	1.1	1.2	0.141421	0.263034
YDL186W	YDL186W		DMA	0.9	1	0.95	0.0707107	-0.0740006
YDL187C	YDL187C		DMA	2	2.1	2.05	0.0707107	1.03562
YDL188C	PPH22		DMA	1.4	1.3	1.35	0.0707107	0.432959
YDL189W	RBS1		DMA	1.4	1.7	1.55	0.212132	0.632268
YDL190C	UFD2		DMA	1.1	1.1	1.1	0	0.137504
YDL191W	RPL35A		DMA	0.7	0.7	0.7	0	-0.514573	1
YDL192W	ARF1		DMA	0.4	0.5	0.45	0.0707107	-1.152
YDL193W	NUS1	nus1-ph	TSv6	1.22739	1.13476	1.18108	0.0654998	0.240105
YDL194W	SNF3		DMA	1.3	0.8	1.05	0.353553	0.0703893
YDL195W	SEC31	sec31-1	TSv6	2.06114	2.45691	2.25903	0.279849	1.1757
YDL197C	ASF2		DMA	1.2	1	1.1	0.141421	0.137504
YDL199C	YDL199C		DMA	1.8	1.1	1.45	0.494975	0.536053
YDL200C	MGT1		DMA	1.2	1.6	1.4	0.282843	0.485427
YDL201W	TRM8		DMA	1.1	1.7	1.4	0.424264	0.485427
YDL203C	ACK1		DMA	1.5	1	1.25	0.353553	0.321928
YDL204W	RTN2		DMA	1.1	1	1.05	0.0707107	0.0703893
YDL206W	YDL206W		DMA	1.5	1.3	1.4	0.141421	0.485427
YDL207W	GLE1	gle1-4	TSv6	1.02223	1.19427	1.10825	0.121654	0.148284
YDL207W	GLE1	gle1-2	TSv6	1.44095	1.35661	1.39878	0.0596401	0.484167
YDL208W	NHP2	nhp2-ph	TSv6	1.12717	1.05997	1.09357	0.0475181	0.129047
YDL209C	CWC2	cwc2-1	TSv6	1.2052	1.27892	1.24206	0.0521257	0.312738
YDL210W	UGA4		DMA	1.2	1.1	1.15	0.0707107	0.201634
YDL211C	YDL211C		DMA	1	1.1	1.05	0.0707107	0.0703893
YDL213C	NOP6		DMA	1.2	0.9	1.05	0.212132	0.0703893
YDL214C	PRR2		DMA	1.1	1.6	1.35	0.353553	0.432959
YDL215C	GDH2		DMA	1	1	1	0	0
YDL216C	RRI1		DMA	1.4	1.1	1.25	0.212132	0.321928
YDL217C	TIM22	tim22-19	TSv6	1.4015	1.5121	1.4568	0.0782024	0.542801		1
YDL218W	YDL218W		DMA	1.5	1.2	1.35	0.212132	0.432959
YDL219W	DTD1		DMA	1.1	1.2	1.15	0.0707107	0.201634
YDL220C	CDC13	cdc13-1	TSv6	1.29919	1.19752	1.24835	0.071891	0.320026
YDL222C	FMP45		DMA	1.1	1.3	1.2	0.141421	0.263034
YDL223C	HBT1		DMA	1.6	1.2	1.4	0.282843	0.485427
YDL224C	WHI4		DMA	1.8	0.2	1	1.13137	0
YDL226C	GCS1		DMA	1	0.9	0.95	0.0707107	-0.0740006
YDL227C	HO		DMA	0.9	0.9	0.9	0	-0.152003
YDL229W	SSB1		DMA	0.9	0.9	0.9	0	-0.152003
YDL230W	PTP1		DMA	1	1.2	1.1	0.141421	0.137504
YDL231C	BRE4		DMA	1.2	1.1	1.15	0.0707107	0.201634
YDL232W	OST4		DMA	0.7	0.6	0.65	0.0707107	-0.621488
YDL233W	MFG1		DMA	1.5	1.8	1.65	0.212132	0.722466
YDL234C	GYP7		DMA	1.3	1	1.15	0.212132	0.201634
YDL236W	PHO13		DMA	1.3	1.9	1.6	0.424264	0.678072
YDL237W	AIM6		DMA	2.1	1.8	1.95	0.212132	0.963474
YDL238C	GUD1		DMA	1.6	1.4	1.5	0.141421	0.584963
YDL239C	ADY3		DMA	0.9	0.9	0.9	0	-0.152003
YDL240W	LRG1		DMA	0.9	1	0.95	0.0707107	-0.0740006
YDL241W	YDL241W		DMA	1.1	1.1	1.1	0	0.137504
YDL242W	YDL242W		DMA	1.4	1.3	1.35	0.0707107	0.432959
YDL243C	AAD4		DMA	1	1.2	1.1	0.141421	0.137504
YDR001C	NTH1		DMA	1.2	1.1	1.15	0.0707107	0.201634
YDR002W	YRB1	yrb1-51	TSv6	1.35276	1.44396	1.39836	0.0644923	0.483737
YDR003W	RCR2		DMA	1	1.5	1.25	0.353553	0.321928
YDR004W	RAD57		DMA	0.8	0.9	0.85	0.0707107	-0.234465
YDR005C	MAF1		DMA	1.3	1.1	1.2	0.141421	0.263034
YDR006C	SOK1		DMA	1	1	1	0	0
YDR007W	TRP1		DMA	1	1.2	1.1	0.141421	0.137504
YDR008C	YDR008C		DMA	1	0.9	0.95	0.0707107	-0.0740006
YDR009W	GAL3		DMA	1.2	1	1.1	0.141421	0.137504
YDR010C	YDR010C		DMA	1	1.2	1.1	0.141421	0.137504
YDR011W	SNQ2		DMA	1.1	1.1	1.1	0	0.137504
YDR013W	PSF1	psf1-1	TSv6	1.1324	1.15821	1.1453	0.018253	0.195732
YDR014W	RAD61		DMA	1	1.1	1.05	0.0707107	0.0703893
YDR015C	YDR015C		DMA	1.3	1	1.15	0.212132	0.201634
YDR016C	DAD1	dad1-ph	TSv6	1.31298	1.34948	1.33123	0.025804	0.41276
YDR018C	YDR018C		DMA	1.1	1.2	1.15	0.0707107	0.201634
YDR019C	GCV1		DMA	1.5	1.4	1.45	0.0707107	0.536053
YDR020C	DAS2		DMA	1.4	1.2	1.3	0.141421	0.378512
YDR021W	FAL1	fal1-1	TSv6	0.878166	0.902316	0.890241	0.0170767	-0.167732
YDR022C	ATG31		DMA	1.2	1.6	1.4	0.282843	0.485427
YDR024W	FYV1		DMA	0.8	0.8	0.8	0	-0.321928
YDR025W	RPS11A		DMA	0.7	0.7	0.7	0	-0.514573
YDR026C	NSI1		DMA	1.3	1.5	1.4	0.141421	0.485427
YDR029W	YDR029W		DMA	1.2	1.1	1.15	0.0707107	0.201634
YDR030C	RAD28		DMA	1	1	1	0	0
YDR031W	MIX14		DMA	1	1	1	0	0
YDR032C	PST2		DMA	0.9	0.9	0.9	0	-0.152003
YDR033W	MRH1		DMA	1	1.1	1.05	0.0707107	0.0703893
YDR034C	LYS14		DMA	0.3	0.3	0.3	0	-1.73697
YDR035W	ARO3		DMA	1.3	1.1	1.2	0.141421	0.263034
YDR036C	EHD3		DMA	1	1.1	1.05	0.0707107	0.0703893
YDR042C	YDR042C		DMA	0.9	1	0.95	0.0707107	-0.0740006
YDR043C	NRG1		DMA	1	1	1	0	0
YDR044W	HEM13	hem13-ph	TSv6	1.646	1.40524	1.52562	0.170246	0.609398
YDR045C	RPC11	rpc11-ph	TSv6	2.48987	1.80968	2.14977	0.480972	1.10419
YDR046C	BAP3		DMA	1.2	1.2	1.2	0	0.263034
YDR048C	YDR048C		DMA	0.9	0.8	0.85	0.0707107	-0.234465
YDR049W	VMS1		DMA	0.8	0.9	0.85	0.0707107	-0.234465
YDR050C	TPI1	tpi1-1670	TSv6	0.887171	1.65666	1.27192	0.544113	0.347004
YDR051C	DET1		DMA	1.1	1.1	1.1	0	0.137504
YDR052C	DBF4	dbf4-2	TSv6	0.915511	0.873631	0.894571	0.0296133	-0.160732
YDR052C	DBF4	dbf4-ts	TSv6	1.2656	1.05041	1.15801	0.152162	0.211642
YDR052C	DBF4	dbf4-4	TSv6	1.21061	1.53813	1.37437	0.231594	0.458768
YDR052C	DBF4	dbf4-1	TSv6	1.47346	1.39604	1.43475	0.0547453	0.520801	1
YDR052C	DBF4	dbf4-3	TSv6	1.50785	1.5825	1.54518	0.0527822	0.627771
YDR054C	CDC34	cdc34-2	TSv6	0.151469	0.634089	0.392779	0.341264	-1.34821
YDR054C	CDC34	cdc34-1	TSv6	1.20016	1.14149	1.17082	0.0414891	0.227523	1
YDR055W	PST1		DMA	1	1	1	0	0
YDR056C	EMC10		DMA	1	1.2	1.1	0.141421	0.137504
YDR057W	YOS9		DMA	1.4	1.3	1.35	0.0707107	0.432959
YDR058C	TGL2		DMA	1.7	0.9	1.3	0.565685	0.378512
YDR059C	UBC5		DMA	1.3	1.4	1.35	0.0707107	0.432959
YDR060W	MAK21	mak21-3	TSv6	1.0289	1.01001	1.01945	0.0133611	0.0277951
YDR060W	MAK21	mak21-1	TSv6	1.28112	1.34487	1.313	0.0450757	0.392863	1
YDR061W	YDR061W		DMA	1.1	1.2	1.15	0.0707107	0.201634
YDR062W	LCB2	lcb2-16	TSv6	0.643154	0.566298	0.604726	0.0543456	-0.725646
YDR062W	LCB2	lcb2-19	TSv6	0.639361	0.649157	0.644259	0.00692748	-0.634287
YDR062W	LCB2	lcb2-1	TSv6	0.615467	0.71873	0.667098	0.0730181	-0.584029
YDR062W	LCB2	lcb2-2	TSv6	0.683425	0.75632	0.719872	0.0515448	-0.474187	1
YDR063W	AIM7		DMA	1	1.1	1.05	0.0707107	0.0703893
YDR064W	RPS13	rps13-ph	TSv6	1.36469	1.62949	1.49709	0.187241	0.582158
YDR066C	RTR2		DMA	1.1	1	1.05	0.0707107	0.0703893
YDR067C	OCA6		DMA	1	1.1	1.05	0.0707107	0.0703893
YDR068W	DOS2		DMA	1.1	1	1.05	0.0707107	0.0703893
YDR070C	FMP16		DMA	1.3	1.1	1.2	0.141421	0.263034
YDR071C	PAA1		DMA	0.9	0.9	0.9	0	-0.152003
YDR072C	IPT1		DMA	1.2	1	1.1	0.141421	0.137504
YDR073W	SNF11		DMA	2	1.4	1.7	0.424264	0.765535
YDR074W	TPS2		DMA	0.8	1.1	0.95	0.212132	-0.0740006	1
YDR075W	PPH3		DMA	1	0.7	0.85	0.212132	-0.234465
YDR076W	RAD55		DMA	0.8	0.7	0.75	0.0707107	-0.415037
YDR077W	SED1		DMA	1.6	1.7	1.65	0.0707107	0.722466
YDR080W	VPS41		DMA	0.7	0.8	0.75	0.0707107	-0.415037
YDR081C	PDC2	ydr081c-ph	TSv6	0.424471	0.545198	0.484834	0.0853673	-1.04444
YDR082W	STN1	stn1-13	TSv6	1.19999	1.19201	1.196	0.00564306	0.25822
YDR083W	RRP8		DMA	0.6	0.6	0.6	0	-0.736966
YDR084C	TVP23		DMA	1.4	1.2	1.3	0.141421	0.378512
YDR085C	AFR1		DMA	1.5	1.7	1.6	0.141421	0.678072
YDR086C	SSS1	sss1-ph	TSv6	1.80486	1.48986	1.64736	0.222742	0.720155
YDR087C	RRP1	rrp1-1	TSv6	0.826278	0.860617	0.843448	0.0242814	-0.245629
YDR088C	SLU7	slu7-ts2	TSv6	0.723485	0.729369	0.726427	0.00416028	-0.46111
YDR088C	SLU7	slu7-ts1	TSv6	1.30523	1.18569	1.24546	0.0845293	0.316678
YDR089W	YDR089W		DMA	1.4	1.3	1.35	0.0707107	0.432959
YDR090C	YDR090C		DMA	1.1	1.2	1.15	0.0707107	0.201634
YDR091C	RLI1	rli1-ph	TSv6	1.34486	1.40689	1.37588	0.0438663	0.460349
YDR092W	UBC13		DMA	0.9	1.3	1.1	0.282843	0.137504
YDR093W	DNF2		DMA	1.3	1.6	1.45	0.212132	0.536053
YDR094W	YDR094W		DMA	1.5	0.8	1.15	0.494975	0.201634
YDR095C	YDR095C		DMA	1.1	1.2	1.15	0.0707107	0.201634
YDR096W	GIS1		DMA	0.9	1.1	1	0.141421	0
YDR097C	MSH6		DMA	1.2	1.1	1.15	0.0707107	0.201634
YDR098C	GRX3		DMA	1.3	1.1	1.2	0.141421	0.263034
YDR099W	BMH2		DMA	0.9	1.1	1	0.141421	0
YDR100W	TVP15		DMA	1.1	1.5	1.3	0.282843	0.378512
YDR101C	ARX1		DMA	0.8	0.8	0.8	0	-0.321928
YDR102C	YDR102C		DMA	1.6	1	1.3	0.424264	0.378512
YDR103W	STE5		DMA	0.2	0.2	0.2	0	-2.32193
YDR104C	SPO71		DMA	1	1.2	1.1	0.141421	0.137504
YDR105C	TMS1		DMA	1.4	1.9	1.65	0.353553	0.722466
YDR107C	TMN2		DMA	1.4	1.3	1.35	0.0707107	0.432959
YDR108W	TRS85		DMA	0.9	1	0.95	0.0707107	-0.0740006
YDR109C	YDR109C		DMA	1.4	1.3	1.35	0.0707107	0.432959
YDR110W	FOB1		DMA	1.1	1.2	1.15	0.0707107	0.201634
YDR111C	ALT2		DMA	1.3	1.5	1.4	0.141421	0.485427
YDR112W	IRC2		DMA	1.2	1	1.1	0.141421	0.137504
YDR113C	PDS1	pds1-128	TSv6	1.17884	1.161	1.16992	0.0126115	0.226408
YDR116C	MRPL1		DMA	0.7	0.6	0.65	0.0707107	-0.621488
YDR117C	TMA64		DMA	1.1	1	1.05	0.0707107	0.0703893
YDR118W	APC4	apc4-ph	TSv6	1.48615	1.50321	1.49468	0.0120649	0.579838
YDR119W	VBA4		DMA	1.5	1.9	1.7	0.282843	0.765535
YDR120C	TRM1		DMA	1.5	1.2	1.35	0.212132	0.432959
YDR121W	DPB4		DMA	1.3	1.6	1.45	0.212132	0.536053
YDR122W	KIN1		DMA	1.8	1.2	1.5	0.424264	0.584963
YDR123C	INO2		DMA	0.6	0.7	0.65	0.0707107	-0.621488
YDR124W	YDR124W		DMA	1.2	1.1	1.15	0.0707107	0.201634
YDR125C	ECM18		DMA	0.9	1.1	1	0.141421	0
YDR126W	SWF1		DMA	0.8	0.9	0.85	0.0707107	-0.234465
YDR127W	ARO1		DMA	0.7	0.8	0.75	0.0707107	-0.415037		1
YDR128W	MTC5		DMA	0.9	0.9	0.9	0	-0.152003	1
YDR130C	FIN1		DMA	1.3	1.3	1.3	0	0.378512
YDR131C	YDR131C		DMA	1.2	1.2	1.2	0	0.263034
YDR132C	YDR132C		DMA	1.2	1.2	1.2	0	0.263034
YDR133C	YDR133C		DMA	1.5	1.4	1.45	0.0707107	0.536053
YDR134C	YDR134C		DMA	1	1.4	1.2	0.282843	0.263034
YDR135C	YCF1		DMA	1.2	0.9	1.05	0.212132	0.0703893
YDR139C	RUB1		DMA	1	1.1	1.05	0.0707107	0.0703893
YDR141C	DOP1	dop1-1	TSv6	2.66184	2.65122	2.65653	0.00751237	1.40954
YDR142C	PEX7		DMA	0.9	0.8	0.85	0.0707107	-0.234465
YDR143C	SAN1		DMA	1.3	1.3	1.3	0	0.378512
YDR144C	MKC7		DMA	0.7	0.6	0.65	0.0707107	-0.621488
YDR145W	TAF12	taf12-l464a	TSv6	0.208344	0.271866	0.240105	0.0449165	-2.05826
YDR145W	TAF12	taf12-ts23	TSv6	0.408037	1.20565	0.806843	0.563998	-0.30964
YDR145W	TAF12	taf12-l446a	TSv6	0.915625	0.965322	0.940474	0.035141	-0.0885408
YDR145W	TAF12	taf12-9	TSv6	1.09061	0.966919	1.02877	0.0874651	0.0409147
YDR145W	TAF12	taf12-w486stop	TSv6	1.04819	1.06858	1.05838	0.0144193	0.081862
YDR146C	SWI5		DMA	0.8	0.8	0.8	0	-0.321928
YDR147W	EKI1		DMA	1	1	1	0	0
YDR148C	KGD2		DMA	1.1	1	1.05	0.0707107	0.0703893
YDR149C	YDR149C		DMA	0.8	0.8	0.8	0	-0.321928
YDR150W	NUM1		DMA	0.8	0.9	0.85	0.0707107	-0.234465
YDR151C	CTH1		DMA	1	1.2	1.1	0.141421	0.137504
YDR152W	GIR2		DMA	1.1	1	1.05	0.0707107	0.0703893
YDR153C	ENT5		DMA	1.1	0.9	1	0.141421	0
YDR154C	YDR154C		DMA	1.1	1.2	1.15	0.0707107	0.201634
YDR155C	CPR1		DMA	0.9	0.8	0.85	0.0707107	-0.234465
YDR156W	RPA14		DMA	0.8	0.8	0.8	0	-0.321928
YDR157W	YDR157W		DMA	0.8	1	0.9	0.141421	-0.152003
YDR158W	HOM2		DMA	0.9	0.9	0.9	0	-0.152003
YDR159W	SAC3		DMA	0.6	0.7	0.65	0.0707107	-0.621488		1
YDR161W	ACL4		DMA	0.8	0.9	0.85	0.0707107	-0.234465
YDR162C	NBP2		DMA	0.8	0.8	0.8	0	-0.321928
YDR163W	CWC15		DMA	1.3	1.1	1.2	0.141421	0.263034
YDR164C	SEC1	sec1-1	TSv6	1.35433	1.2897	1.32202	0.045699	0.402739
YDR165W	TRM82		DMA	0.9	0.9	0.9	0	-0.152003
YDR166C	SEC5	sec5-24	TSv6	1.38579	1.37762	1.38171	0.00577545	0.466451
YDR167W	TAF10	taf10-ts34	TSv6	0.44261	0.554505	0.498557	0.0791223	-1.00417
YDR168W	CDC37	cdc37-1	TSv6	0.96541	0.816826	0.891118	0.105064	-0.166311
YDR168W	CDC37	cdc37-ts	TSv6	0.959333	1.06266	1.011	0.0730656	0.0157805
YDR169C	STB3		DMA	1.1	1	1.05	0.0707107	0.0703893
YDR170C	SEC7	sec7-1	TSv6	1.38438	1.40375	1.39406	0.0136963	0.479294
YDR171W	HSP42		DMA	1.1	1.5	1.3	0.282843	0.378512
YDR172W	SUP35	sup35-td	TSv6	0.480723	0.500864	0.490793	0.0142423	-1.02681		1
YDR173C	ARG82		DMA	0.4	0.4	0.4	0	-1.32193		1
YDR174W	HMO1		DMA	0.5	0.6	0.55	0.0707107	-0.862496
YDR178W	SDH4		DMA	0.9	1	0.95	0.0707107	-0.0740006
YDR179C	CSN9		DMA	1.1	1.1	1.1	0	0.137504
YDR179W-A	NVJ3		DMA	1.4	1.4	1.4	0	0.485427
YDR180W	SCC2	scc2-4	TSv6	1.28533	1.14006	1.21269	0.102724	0.278213
YDR181C	SAS4		DMA	1.8	1.4	1.6	0.282843	0.678072
YDR182W	CDC1	cdc1-4	TSv6	0.585345	0.771927	0.678636	0.131934	-0.55929
YDR182W	CDC1	cdc1-1	TSv6	0.802836	0.964604	0.88372	0.114387	-0.178339	1
YDR182W	CDC1	cdc1-6	TSv6	0.994168	0.874523	0.934346	0.0846023	-0.0979719
YDR182W	CDC1	cdc1-2	TSv6	1.35551	1.47388	1.41469	0.0836972	0.50049
YDR183W	PLP1		DMA	0.9	1	0.95	0.0707107	-0.0740006
YDR184C	ATC1		DMA	0.9	0.9	0.9	0	-0.152003
YDR185C	UPS3		DMA	1.1	1.6	1.35	0.353553	0.432959
YDR186C	YDR186C		DMA	0.7	1.8	1.25	0.777817	0.321928
YDR188W	CCT6	cct6-18	TSv6	0.935438	0.90636	0.920899	0.0205607	-0.118885
YDR189W	SLY1	sly1-ts	TSv6	1.2517	1.26939	1.26055	0.0125064	0.334048
YDR191W	HST4		DMA	0.9	1.3	1.1	0.282843	0.137504
YDR192C	NUP42		DMA	1.3	1.2	1.25	0.0707107	0.321928
YDR193W	YDR193W		DMA	1.6	1.2	1.4	0.282843	0.485427
YDR196C	CAB5	cab5-1	TSv6	0.849521	0.931497	0.890509	0.0579656	-0.167298
YDR196C	CAB5	cab5-ph	TSv6	1.27443	1.23313	1.25378	0.0292035	0.326287
YDR198C	RKM2		DMA	1.4	1.6	1.5	0.141421	0.584963
YDR199W	YDR199W		DMA	1.3	0.9	1.1	0.282843	0.137504
YDR201W	SPC19	spc19-ph	TSv6	0.991923	0.954445	0.973184	0.0265013	-0.0392154
YDR202C	RAV2		DMA	1.3	1.6	1.45	0.212132	0.536053
YDR203W	YDR203W		DMA	1.4	1.2	1.3	0.141421	0.378512
YDR205W	MSC2		DMA	1.5	1.7	1.6	0.141421	0.678072
YDR206W	EBS1		DMA	1.1	0.9	1	0.141421	0
YDR207C	UME6		DMA	0.5	0.6	0.55	0.0707107	-0.862496		1
YDR208W	MSS4	mss4-102	TSv6	0.303324	0.256057	0.279691	0.0334233	-1.8381
YDR208W	MSS4	mss4-103	TSv6	1.33467	1.68735	1.51101	0.249384	0.595511
YDR209C	YDR209C		DMA	1.2	1.3	1.25	0.0707107	0.321928
YDR210W	YDR210W		DMA	1.4	1.5	1.45	0.0707107	0.536053
YDR212W	TCP1	tcp1-1	TSv6	1.13602	0.979827	1.05793	0.110447	0.0812377
YDR212W	TCP1	tcp1-2	TSv6	1.11856	1.21226	1.16541	0.0662615	0.220837
YDR213W	UPC2		DMA	1.2	1.1	1.15	0.0707107	0.201634
YDR214W	AHA1		DMA	1.4	1.1	1.25	0.212132	0.321928
YDR215C	YDR215C		DMA	1.2	1.3	1.25	0.0707107	0.321928
YDR216W	ADR1		DMA	2.1	1.1	1.6	0.707107	0.678072
YDR217C	RAD9		DMA	1	1.1	1.05	0.0707107	0.0703893
YDR218C	SPR28		DMA	0.9	1	0.95	0.0707107	-0.0740006
YDR219C	MFB1		DMA	0.8	0.8	0.8	0	-0.321928
YDR220C	YDR220C		DMA	1.8	1.1	1.45	0.494975	0.536053
YDR221W	GTB1		DMA	1.2	1.6	1.4	0.282843	0.485427
YDR222W	YDR222W		DMA	1.3	1.3	1.3	0	0.378512
YDR223W	CRF1		DMA	1.1	1.1	1.1	0	0.137504
YDR225W	HTA1		DMA	0.8	0.9	0.85	0.0707107	-0.234465
YDR227W	SIR4		DMA	0.2	0.2	0.2	0	-2.32193
YDR228C	PCF11	pcf11-2	TSv6	1.01628	1.02315	1.01972	0.00485861	0.0281704
YDR228C	PCF11	pcf11-1	TSv6	1.14612	1.18687	1.16649	0.0288125	0.222179
YDR228C	PCF11	pcf11-ts2	TSv6	1.39629	1.2262	1.31124	0.120268	0.390935
YDR228C	PCF11	pcf11-ts9	TSv6	1.45782	1.20835	1.33308	0.1764	0.414767
YDR228C	PCF11	pcf11-ts10	TSv6	3.219	1.43389	2.32644	1.26226	1.21813
YDR229W	IVY1		DMA	1.6	1.4	1.5	0.141421	0.584963
YDR233C	RTN1		DMA	1.3	1.1	1.2	0.141421	0.263034
YDR234W	LYS4		DMA	0.3	0.4	0.35	0.0707107	-1.51457
YDR235W	PRP42	prp42-ph	TSv6	0.132122	0.221772	0.176947	0.063392	-2.49861
YDR236C	FMN1	ydr236c-ph	TSv6	1.12719	0.96673	1.04696	0.113465	0.0662095
YDR238C	SEC26	sec26-f856aw860a	TSv6	1.37354	1.4718	1.42267	0.0694765	0.508602
YDR238C	SEC26	sec26-11d26	TSv6	1.79802	1.91692	1.85747	0.0840753	0.893341
YDR239C	YDR239C		DMA	1.5	1.5	1.5	0	0.584963
YDR240C	SNU56	ydr240c-ph	TSv6	1.35736	1.26962	1.31349	0.0620448	0.393406
YDR241W	BUD26		DMA	0.7	1.1	0.9	0.282843	-0.152003
YDR242W	AMD2		DMA	1.1	0.9	1	0.141421	0
YDR243C	PRP28	prp28-101	TSv6	1.29678	1.52878	1.41278	0.164053	0.498537
YDR244W	PEX5		DMA	1	1.1	1.05	0.0707107	0.0703893
YDR245W	MNN10		DMA	0.5	0.5	0.5	0	-1
YDR245W	MNN10	mnn10-supp1	TSv6	0.67305	0.664941	0.668995	0.00573395	-0.579932
YDR246W	TRS23	trs23-ph	TSv6	1.02367	0.970381	0.997028	0.0376844	-0.00429397
YDR247W	VHS1		DMA	1.2	1.1	1.15	0.0707107	0.201634
YDR248C	YDR248C		DMA	1.2	0.9	1.05	0.212132	0.0703893
YDR249C	YDR249C		DMA	1.1	1.2	1.15	0.0707107	0.201634
YDR250C	YDR250C		DMA	1.4	1.3	1.35	0.0707107	0.432959
YDR251W	PAM1		DMA	1.3	1.1	1.2	0.141421	0.263034
YDR252W	BTT1		DMA	1.2	0.9	1.05	0.212132	0.0703893
YDR253C	MET32		DMA	1.1	1.1	1.1	0	0.137504
YDR254W	CHL4		DMA	1.3	1.4	1.35	0.0707107	0.432959
YDR255C	RMD5		DMA	1.3	1.2	1.25	0.0707107	0.321928
YDR256C	CTA1		DMA	2	1.5	1.75	0.353553	0.807355
YDR257C	RKM4		DMA	1	1.3	1.15	0.212132	0.201634
YDR258C	HSP78		DMA	1	1.4	1.2	0.282843	0.263034
YDR259C	YAP6		DMA	1.1	1.1	1.1	0	0.137504
YDR260C	SWM1		DMA	1.2	0.9	1.05	0.212132	0.0703893
YDR261C	EXG2		DMA	0.9	1	0.95	0.0707107	-0.0740006
YDR262W	YDR262W		DMA	1.2	1	1.1	0.141421	0.137504
YDR263C	DIN7		DMA	1.5	1.1	1.3	0.282843	0.378512
YDR265W	PEX10		DMA	1	0.8	0.9	0.141421	-0.152003
YDR266C	HEL2		DMA	1.3	1.2	1.25	0.0707107	0.321928
YDR269C	YDR269C		DMA	1	1	1	0	0
YDR270W	CCC2		DMA	1.6	1.5	1.55	0.0707107	0.632268
YDR271C	YDR271C		DMA	1.1	1.1	1.1	0	0.137504
YDR272W	GLO2		DMA	1.5	1.2	1.35	0.212132	0.432959
YDR273W	DON1		DMA	1.1	1.4	1.25	0.212132	0.321928
YDR274C	YDR274C		DMA	1.2	1	1.1	0.141421	0.137504
YDR275W	BSC2		DMA	1.4	1	1.2	0.282843	0.263034
YDR276C	PMP3		DMA	0.8	0.8	0.8	0	-0.321928
YDR277C	MTH1		DMA	1.2	1	1.1	0.141421	0.137504
YDR278C	YDR278C		DMA	0.9	0.9	0.9	0	-0.152003
YDR279W	RNH202		DMA	0.9	1	0.95	0.0707107	-0.0740006
YDR280W	RRP45	rrp45-ph	TSv6	1.39016	1.59081	1.49049	0.141879	0.575785
YDR281C	PHM6		DMA	1.4	1.5	1.45	0.0707107	0.536053
YDR282C	MRX10		DMA	1.2	1.3	1.25	0.0707107	0.321928
YDR284C	DPP1		DMA	1.2	1.1	1.15	0.0707107	0.201634
YDR285W	ZIP1		DMA	1.2	1	1.1	0.141421	0.137504
YDR286C	YDR286C		DMA	1.2	1.1	1.15	0.0707107	0.201634
YDR287W	INM2		DMA	1.1	1.1	1.1	0	0.137504
YDR288W	NSE3	nse3-ts3	TSv6	1.06041	0.976863	1.01864	0.0590799	0.0266423
YDR288W	NSE3	nse3-ts4	TSv6	1.17302	1.08635	1.12968	0.0612834	0.175918
YDR288W	NSE3	nse3-ph	TSv6	1.32322	1.56568	1.44445	0.171447	0.530523		1
YDR289C	RTT103		DMA	0.7	0.8	0.75	0.0707107	-0.415037
YDR290W	YDR290W		DMA	1	0.9	0.95	0.0707107	-0.0740006
YDR291W	HRQ1		DMA	1.2	0.9	1.05	0.212132	0.0703893
YDR292C	SRP101	srp101-47	TSv6	1.17425	1.1706	1.17243	0.00257842	0.229499		1
YDR293C	SSD1		DMA	1.9	1.1	1.5	0.565685	0.584963
YDR294C	DPL1		DMA	1	1.1	1.05	0.0707107	0.0703893
YDR297W	SUR2		DMA	1.2	1.1	1.15	0.0707107	0.201634
YDR299W	BFR2	bfr2-ph	TSv6	0.44868	0.414945	0.431812	0.0238545	-1.21152		1
YDR302W	GPI11	gpi11-ph	TSv6	1.03583	1.03515	1.03549	0.000480584	0.0503074
YDR303C	RSC3	rsc3-1	TSv6	1.51331	1.47967	1.49649	0.0237906	0.581582
YDR304C	CPR5		DMA	0.9	1.3	1.1	0.282843	0.137504
YDR305C	HNT2		DMA	0.7	1	0.85	0.212132	-0.234465
YDR306C	YDR306C		DMA	0.8	1	0.9	0.141421	-0.152003
YDR307W	PMT7		DMA	1.2	1	1.1	0.141421	0.137504
YDR309C	GIC2		DMA	1.1	1.4	1.25	0.212132	0.321928
YDR310C	SUM1		DMA	1	1	1	0	0
YDR311W	TFB1	tfb1-6	TSv6	0.766363	0.677639	0.722001	0.0627377	-0.469927	1
YDR311W	TFB1	tfb1-1	TSv6	0.933536	0.979463	0.956499	0.0324756	-0.0641643
YDR312W	SSF2		DMA	1.1	1.2	1.15	0.0707107	0.201634
YDR313C	PIB1		DMA	1	1	1	0	0
YDR314C	RAD34		DMA	1.1	1.5	1.3	0.282843	0.378512
YDR315C	IPK1		DMA	0.7	0.6	0.65	0.0707107	-0.621488
YDR316W	OMS1		DMA	0.8	1	0.9	0.141421	-0.152003
YDR317W	HIM1		DMA	1.3	0.9	1.1	0.282843	0.137504
YDR318W	MCM21		DMA	0.9	0.8	0.85	0.0707107	-0.234465
YDR319C	YFT2		DMA	1.4	1.7	1.55	0.212132	0.632268
YDR320C	SWA2		DMA	1	0.9	0.95	0.0707107	-0.0740006
YDR321W	ASP1		DMA	1.5	1.4	1.45	0.0707107	0.536053
YDR325W	YCG1	ycg1-2	TSv6	1.40547	1.32666	1.36607	0.0557271	0.450029
YDR326C	YSP2		DMA	1.1	1.1	1.1	0	0.137504
YDR328C	SKP1	skp1-3	TSv6	0.642929	0.5418	0.592365	0.0715092	-0.755442
YDR329C	PEX3		DMA	1.2	1.3	1.25	0.0707107	0.321928
YDR330W	UBX5		DMA	1.7	1.4	1.55	0.212132	0.632268
YDR331W	GPI8	gpi8-ts	TSv6	0.980881	0.882709	0.931795	0.069418	-0.101915
YDR331W	GPI8	ydr331w-ph	TSv6	1.21557	0.93985	1.07771	0.194966	0.107972
YDR332W	IRC3		DMA	1.6	1.3	1.45	0.212132	0.536053
YDR333C	RQC1		DMA	1.3	1	1.15	0.212132	0.201634
YDR334W	SWR1		DMA	0.7	0.8	0.75	0.0707107	-0.415037
YDR335W	MSN5		DMA	0.8	0.9	0.85	0.0707107	-0.234465
YDR336W	MRX8		DMA	1	1.1	1.05	0.0707107	0.0703893
YDR338C	YDR338C		DMA	1	0.8	0.9	0.141421	-0.152003
YDR339C	FCF1	fcf1-ph	TSv6	1.08657	0.944138	1.01535	0.100716	0.021984
YDR340W	YDR340W		DMA	1.3	1.1	1.2	0.141421	0.263034
YDR341C	YDR341C	ydr341c-ph	TSv6	1.32487	1.18485	1.25486	0.0990062	0.327524
YDR344C	YDR344C		DMA	1.1	1.1	1.1	0	0.137504
YDR345C	HXT3		DMA	1.6	1.9	1.75	0.212132	0.807355
YDR346C	SVF1		DMA	1.1	1.5	1.3	0.282843	0.378512
YDR348C	PAL1		DMA	1	1.1	1.05	0.0707107	0.0703893
YDR349C	YPS7		DMA	1.1	1	1.05	0.0707107	0.0703893
YDR351W	SBE2		DMA	1.1	1	1.05	0.0707107	0.0703893
YDR352W	YPQ2		DMA	1.2	1.6	1.4	0.282843	0.485427
YDR354W	TRP4		DMA	1.2	1	1.1	0.141421	0.137504
YDR356W	SPC110	spc110-220	TSv6	0.689153	0.75198	0.720567	0.0444253	-0.472796
YDR356W	SPC110	spc110-221	TSv6	1.0288	1.1715	1.10015	0.1009	0.137699
YDR357C	CNL1		DMA	2.1	1.4	1.75	0.494975	0.807355
YDR358W	GGA1		DMA	1.4	1.8	1.6	0.282843	0.678072
YDR359C	EAF1		DMA	0.4	0.5	0.45	0.0707107	-1.152		1
YDR360W	OPI7		DMA	1	1	1	0	0
YDR361C	BCP1	bcp1-ts	TSv6	1.18069	1.10602	1.14335	0.0528009	0.193269
YDR362C	TFC6	tfc6-m1	TSv6	1.65362	1.58779	1.62071	0.046548	0.696622
YDR363W	ESC2		DMA	0.9	0.8	0.85	0.0707107	-0.234465
YDR363W-A	SEM1		DMA	0.9	1	0.95	0.0707107	-0.0740006
YDR364C	CDC40	cdc40-ts	TSv6	0.626505	0.557715	0.59211	0.048642	-0.756062
YDR368W	YPR1		DMA	1.1	1.1	1.1	0	0.137504
YDR369C	XRS2		DMA	0.9	0.9	0.9	0	-0.152003
YDR370C	DXO1		DMA	1.2	1	1.1	0.141421	0.137504
YDR371W	CTS2		DMA	1.2	1	1.1	0.141421	0.137504
YDR372C	VPS74		DMA	0.9	1	0.95	0.0707107	-0.0740006
YDR373W	FRQ1	frq1-1	TSv6	1.90033	1.42204	1.66119	0.338203	0.732216
YDR374C	PHO92		DMA	1.1	1	1.05	0.0707107	0.0703893
YDR375C	BCS1		DMA	0.7	0.6	0.65	0.0707107	-0.621488
YDR378C	LSM6		DMA	0.4	0.4	0.4	0	-1.32193
YDR379W	RGA2		DMA	1.6	1.5	1.55	0.0707107	0.632268
YDR380W	ARO10		DMA	1	1.4	1.2	0.282843	0.263034
YDR382W	RPP2B		DMA	1.1	1.1	1.1	0	0.137504
YDR383C	NKP1		DMA	1	1	1	0	0
YDR384C	ATO3		DMA	1	1.1	1.05	0.0707107	0.0703893
YDR385W	EFT2		DMA	0.8	0.8	0.8	0	-0.321928
YDR386W	MUS81		DMA	1	1.1	1.05	0.0707107	0.0703893
YDR387C	YDR387C		DMA	1.1	1.1	1.1	0	0.137504
YDR388W	RVS167		DMA	0.7	0.8	0.75	0.0707107	-0.415037
YDR389W	SAC7		DMA	0.7	0.7	0.7	0	-0.514573	1
YDR391C	YDR391C		DMA	1.3	1.2	1.25	0.0707107	0.321928
YDR392W	SPT3		DMA	0.7	0.8	0.75	0.0707107	-0.415037
YDR393W	SHE9		DMA	0.9	0.8	0.85	0.0707107	-0.234465
YDR394W	RPT3	rpt3-1	TSv6	1.45111	1.30099	1.37605	0.106152	0.46053
YDR395W	SXM1		DMA	1.1	1	1.05	0.0707107	0.0703893		1
YDR398W	UTP5	ydr398w-ph	TSv6	1.08936	0.963405	1.02638	0.0890617	0.0375671
YDR399W	HPT1		DMA	1	1	1	0	0
YDR400W	URH1		DMA	1.2	0.6	0.9	0.424264	-0.152003
YDR401W	YDR401W		DMA	1.1	1.2	1.15	0.0707107	0.201634
YDR402C	DIT2		DMA	1.2	1	1.1	0.141421	0.137504
YDR403W	DIT1		DMA	1.2	1.2	1.2	0	0.263034
YDR404C	RPB7	ydr404c-ph	TSv6	0.52675	0.663458	0.595104	0.0966671	-0.748786
YDR406W	PDR15		DMA	1.2	1.6	1.4	0.282843	0.485427
YDR408C	ADE8		DMA	1.2	1.3	1.25	0.0707107	0.321928
YDR409W	SIZ1		DMA	1.2	1	1.1	0.141421	0.137504	1
YDR410C	STE14		DMA	0.2	0.3	0.25	0.0707107	-2
YDR411C	DFM1		DMA	1.2	1	1.1	0.141421	0.137504
YDR414C	ERD1		DMA	1	0.9	0.95	0.0707107	-0.0740006
YDR415C	YDR415C		DMA	0.6	1.2	0.9	0.424264	-0.152003
YDR416W	SYF1	ydr416w-ph	TSv6	0.762979	0.807903	0.785441	0.0317667	-0.348425
YDR419W	RAD30		DMA	1.5	1.1	1.3	0.282843	0.378512
YDR420W	HKR1		DMA	0.9	0.9	0.9	0	-0.152003
YDR421W	ARO80		DMA	0.9	0.9	0.9	0	-0.152003
YDR422C	SIP1		DMA	1.1	1.1	1.1	0	0.137504
YDR423C	CAD1		DMA	1	0.9	0.95	0.0707107	-0.0740006
YDR424C	DYN2		DMA	0.9	1.2	1.05	0.212132	0.0703893
YDR425W	SNX41		DMA	0.8	1	0.9	0.141421	-0.152003
YDR426C	YDR426C		DMA	0.8	1	0.9	0.141421	-0.152003
YDR428C	BNA7		DMA	1.1	1.1	1.1	0	0.137504
YDR430C	CYM1		DMA	1.2	1.3	1.25	0.0707107	0.321928
YDR431W	YDR431W		DMA	0.9	0.8	0.85	0.0707107	-0.234465
YDR434W	GPI17	gpi17-ph	TSv6	1.2355	1.02071	1.1281	0.151876	0.173901	1
YDR435C	PPM1		DMA	1.6	1.1	1.35	0.353553	0.432959
YDR436W	PPZ2		DMA	1.7	1.1	1.4	0.424264	0.485427
YDR437W	GPI19	gpi19-2	TSv6	1.14949	0.991802	1.07065	0.111501	0.0984804
YDR437W	GPI19	gpi19-ph	TSv6	1.26086	1.0865	1.17368	0.123291	0.231035
YDR437W	GPI19	gpi19-2xh	TSv6	1.26878	1.31034	1.28956	0.0293831	0.366878
YDR438W	THI74		DMA	0.9	1.1	1	0.141421	0
YDR439W	LRS4		DMA	1.1	0.9	1	0.141421	0
YDR440W	DOT1		DMA	1	1.2	1.1	0.141421	0.137504
YDR441C	APT2		DMA	1	1.3	1.15	0.212132	0.201634
YDR444W	YDR444W		DMA	1.1	1.2	1.15	0.0707107	0.201634
YDR445C	YDR445C		DMA	1.2	1.2	1.2	0	0.263034
YDR446W	ECM11		DMA	1.1	1.2	1.15	0.0707107	0.201634
YDR447C	RPS17B		DMA	1.1	0.9	1	0.141421	0
YDR449C	UTP6	ydr449c-ph	TSv6	1.39758	1.30474	1.35116	0.0656516	0.434201
YDR451C	YHP1		DMA	1	0.9	0.95	0.0707107	-0.0740006
YDR452W	PPN1		DMA	0.9	1.4	1.15	0.353553	0.201634
YDR453C	TSA2		DMA	1.2	1	1.1	0.141421	0.137504
YDR454C	GUK1	guk1-ph	TSv6	0.950652	1.0697	1.01017	0.0841771	0.0146047
YDR455C	YDR455C		DMA	1	1.1	1.05	0.0707107	0.0703893
YDR458C	HEH2		DMA	1	1	1	0	0
YDR459C	PFA5		DMA	1.1	1	1.05	0.0707107	0.0703893
YDR460W	TFB3	tfb3-ts	TSv6	0.673656	0.511272	0.592464	0.114823	-0.755201
YDR461W	MFA1		DMA	0.9	1.1	1	0.141421	0
YDR463W	STP1		DMA	1.1	0.8	0.95	0.212132	-0.0740006
YDR465C	RMT2		DMA	1.2	1	1.1	0.141421	0.137504
YDR466W	PKH3		DMA	1.1	1.1	1.1	0	0.137504
YDR467C	YDR467C		DMA	1.5	1.7	1.6	0.141421	0.678072
YDR469W	SDC1		DMA	0.9	0.2	0.55	0.494975	-0.862496
YDR471W	RPL27B		DMA	0.8	0.8	0.8	0	-0.321928
YDR473C	PRP3	prp3-1	TSv6	1.47497	1.41267	1.44382	0.0440533	0.529891
YDR474C	YDR474C		DMA	1	1.2	1.1	0.141421	0.137504
YDR475C	JIP4		DMA	0.9	1	0.95	0.0707107	-0.0740006
YDR476C	YDR476C		DMA	1.1	1.1	1.1	0	0.137504
YDR477W	SNF1		DMA	0.8	0.8	0.8	0	-0.321928
YDR478W	SNM1	snm1-ph	TSv6	0.217264	0.278418	0.247841	0.0432425	-2.01251
YDR478W	SNM1	snm1-172	TSv6	0.966022	0.177041	0.571531	0.557894	-0.807095
YDR479C	PEX29		DMA	1	1.1	1.05	0.0707107	0.0703893
YDR480W	DIG2		DMA	1.5	1.4	1.45	0.0707107	0.536053
YDR481C	PHO8		DMA	1	1.9	1.45	0.636396	0.536053
YDR482C	CWC21		DMA	1.5	1.5	1.5	0	0.584963
YDR483W	KRE2		DMA	1	1	1	0	0
YDR483W	KRE2		DMA	1.5	1.5	1.5	0	0.584963
YDR485C	VPS72		DMA	0.8	0.9	0.85	0.0707107	-0.234465
YDR486C	VPS60		DMA	1	1	1	0	0
YDR488C	PAC11		DMA	0.9	0.9	0.9	0	-0.152003
YDR489W	SLD5	sld5-ph	TSv6	1.14223	1.17299	1.15761	0.0217517	0.21115
YDR490C	PKH1		DMA	1.2	1.4	1.3	0.141421	0.378512
YDR491C	YDR491C		DMA	1.2	1.1	1.15	0.0707107	0.201634
YDR492W	IZH1		DMA	1.6	1.2	1.4	0.282843	0.485427
YDR493W	MZM1		DMA	1	1	1	0	0
YDR494W	RSM28		DMA	1.2	1.1	1.15	0.0707107	0.201634
YDR496C	PUF6		DMA	0.8	0.9	0.85	0.0707107	-0.234465
YDR497C	ITR1		DMA	1.6	1.1	1.35	0.353553	0.432959
YDR498C	SEC20	sec20-1	TSv6	0.906326	0.989379	0.947853	0.0587277	-0.0772654
YDR500C	RPL37B		DMA	0.2	0.2	0.2	0	-2.32193
YDR501W	PLM2		DMA	1.7	1.7	1.7	0	0.765535
YDR502C	SAM2		DMA	1	1	1	0	0
YDR503C	LPP1		DMA	1.3	1.2	1.25	0.0707107	0.321928
YDR504C	SPG3		DMA	1.5	1.1	1.3	0.282843	0.378512
YDR505C	PSP1		DMA	1	0.9	0.95	0.0707107	-0.0740006
YDR506C	GMC1		DMA	1	1	1	0	0
YDR508C	GNP1		DMA	0.9	1.1	1	0.141421	0
YDR509W	YDR509W		DMA	1	1	1	0	0
YDR510W	SMT3	smt3-331	TSv6	0.885837	0.92862	0.907229	0.0302522	-0.140462
YDR511W	SDH7		DMA	1.1	1	1.05	0.0707107	0.0703893
YDR512C	EMI1		DMA	0.8	0.8	0.8	0	-0.321928
YDR513W	GRX2		DMA	1.2	1.2	1.2	0	0.263034
YDR514C	YDR514C		DMA	0.9	0.7	0.8	0.141421	-0.321928
YDR515W	SLF1		DMA	1	0.9	0.95	0.0707107	-0.0740006
YDR516C	EMI2		DMA	1.8	1.6	1.7	0.141421	0.765535
YDR517W	GRH1		DMA	1.3	1.1	1.2	0.141421	0.263034
YDR519W	FPR2		DMA	1.2	1.2	1.2	0	0.263034
YDR520C	URC2		DMA	1.2	1.1	1.15	0.0707107	0.201634
YDR522C	SPS2		DMA	1.1	1	1.05	0.0707107	0.0703893
YDR524C	AGE1		DMA	1	1.1	1.05	0.0707107	0.0703893
YDR525W	API2		DMA	0.9	1	0.95	0.0707107	-0.0740006
YDR525W-A	SNA2		DMA	1	1	1	0	0
YDR527W	RBA50	rba50-ph	TSv6	1.27165	1.16273	1.21719	0.0770129	0.283556
YDR528W	HLR1		DMA	1.1	1.2	1.15	0.0707107	0.201634
YDR530C	APA2		DMA	1.2	1.3	1.25	0.0707107	0.321928
YDR531W	CAB1	cab1-ph	TSv6	0.955189	0.919555	0.937372	0.0251968	-0.0933061
YDR532C	KRE28		DMA	0.4	0.4	0.4	0	-1.32193
YDR533C	HSP31		DMA	1.1	1.2	1.15	0.0707107	0.201634
YDR534C	FIT1		DMA	1.1	1.1	1.1	0	0.137504
YDR535C	YDR535C		DMA	1.2	1.1	1.15	0.0707107	0.201634
YDR536W	STL1		DMA	1.2	1	1.1	0.141421	0.137504
YDR537C	YDR537C		DMA	1	1	1	0	0
YDR538W	PAD1		DMA	1	1.1	1.05	0.0707107	0.0703893
YDR539W	FDC1		DMA	1.1	1.1	1.1	0	0.137504
YDR540C	IRC4		DMA	1.3	1.1	1.2	0.141421	0.263034
YDR541C	YDR541C		DMA	1.2	1.2	1.2	0	0.263034
YER041W	YEN1		DMA	1	1.1	1.05	0.0707107	0.0703893
YER042W	MXR1		DMA	1.1	1	1.05	0.0707107	0.0703893
YER044C-A	MEI4		DMA	1.1	1	1.05	0.0707107	0.0703893
YER045C	ACA1		DMA	1.1	1.1	1.1	0	0.137504
YER046W	SPO73		DMA	1.2	1	1.1	0.141421	0.137504
YER046W-A	YER046W-A		DMA	1	1	1	0	0
YER047C	SAP1		DMA	0.9	1.3	1.1	0.282843	0.137504
YER048C	CAJ1		DMA	0.8	0.9	0.85	0.0707107	-0.234465
YER049W	TPA1		DMA	1	1.1	1.05	0.0707107	0.0703893
YER051W	JHD1		DMA	1.5	1	1.25	0.353553	0.321928
YER052C	HOM3		DMA	0.7	0.8	0.75	0.0707107	-0.415037
YER053C	PIC2		DMA	0.9	1.3	1.1	0.282843	0.137504
YER054C	GIP2		DMA	1.4	1.1	1.25	0.212132	0.321928
YER055C	HIS1		DMA	0.3	0.2	0.25	0.0707107	-2
YER056C	FCY2		DMA	0.9	1	0.95	0.0707107	-0.0740006
YER056C-A	RPL34A		DMA	0.9	0.8	0.85	0.0707107	-0.234465
YER057C	HMF1		DMA	1.2	1.3	1.25	0.0707107	0.321928
YER059W	PCL6		DMA	1	1.7	1.35	0.494975	0.432959
YER060W	FCY21		DMA	1.3	1.3	1.3	0	0.378512
YER060W-A	FCY22		DMA	1.3	1.5	1.4	0.141421	0.485427
YER061C	CEM1		DMA	0.6	0.6	0.6	0	-0.736966
YER062C	GPP2		DMA	1.7	1.1	1.4	0.424264	0.485427
YER063W	THO1		DMA	1.1	1.1	1.1	0	0.137504
YER064C	VHR2		DMA	1.3	1.1	1.2	0.141421	0.263034
YER065C	ICL1		DMA	1	1	1	0	0
YER066C-A	YER066C-A		DMA	1	1.3	1.15	0.212132	0.201634
YER066W	RRT13		DMA	1.3	1	1.15	0.212132	0.201634
YER067C-A	YER067C-A		DMA	0.9	1.3	1.1	0.282843	0.137504
YER067W	RGI1		DMA	1.2	1.2	1.2	0	0.263034
YER069W	ARG5,6		DMA	0.3	0.3	0.3	0	-1.73697
YER071C	TDA2		DMA	1.6	1	1.3	0.424264	0.378512
YER072W	VTC1		DMA	1.2	1.3	1.25	0.0707107	0.321928
YER073W	ALD5		DMA	0.9	1	0.95	0.0707107	-0.0740006
YER074W	RPS24A		DMA	0.6	0.5	0.55	0.0707107	-0.862496
YER075C	PTP3		DMA	0.9	1.2	1.05	0.212132	0.0703893
YER077C	MRX1		DMA	1.2	1	1.1	0.141421	0.137504
YER078C	ICP55		DMA	1.1	1	1.05	0.0707107	0.0703893
YER079W	YER079W		DMA	1.1	1.5	1.3	0.282843	0.378512
YER080W	AIM9		DMA	1.2	1.2	1.2	0	0.263034
YER081W	SER3		DMA	1	1.3	1.15	0.212132	0.201634
YER083C	GET2		DMA	0.9	0.9	0.9	0	-0.152003
YER084W	YER084W		DMA	1.6	1.7	1.65	0.0707107	0.722466
YER085C	YER085C		DMA	1.2	1.2	1.2	0	0.263034
YER087C-A	YER087C-A		DMA	1	1.1	1.05	0.0707107	0.0703893
YER088C	DOT6		DMA	1.1	1.2	1.15	0.0707107	0.201634
YER089C	PTC2		DMA	1.1	0.9	1	0.141421	0
YER090W	TRP2		DMA	1.2	1.1	1.15	0.0707107	0.201634
YER091C	MET6		DMA	1	1.2	1.1	0.141421	0.137504
YER091C-A	YER091C-A		DMA	1.3	1.2	1.25	0.0707107	0.321928
YER092W	IES5		DMA	0.9	0.9	0.9	0	-0.152003
YER093C	TSC11	tsc11-5	TSv6	1.19091	1.32913	1.26002	0.0977354	0.333445
YER093C	TSC11	tsc11-1	TSv6	1.23782	1.32374	1.28078	0.0607595	0.357024
YER093C	TSC11	tsc11-7	TSv6	1.71106	2.36476	2.03791	0.462238	1.02709
YER093C-A	AIM11		DMA	0.9	0.9	0.9	0	-0.152003		1
YER094C	PUP3	pup3-ph	TSv6	1.16543	1.22479	1.19511	0.0419765	0.257147	1
YER095W	RAD51		DMA	0.9	1	0.95	0.0707107	-0.0740006
YER096W	SHC1		DMA	1.1	1.5	1.3	0.282843	0.378512
YER097W	YER097W		DMA	1.6	1.4	1.5	0.141421	0.584963
YER098W	UBP9		DMA	1.1	1.1	1.1	0	0.137504
YER101C	AST2		DMA	1	1.2	1.1	0.141421	0.137504
YER106W	MAM1		DMA	1.2	1.1	1.15	0.0707107	0.201634
YER108C	YER108C		DMA	1.1	1.1	1.1	0	0.137504
YER109C	FLO8		DMA	1	1.1	1.05	0.0707107	0.0703893
YER111C	SWI4		DMA	0.9	0.8	0.85	0.0707107	-0.234465
YER113C	TMN3		DMA	1.2	1.2	1.2	0	0.263034
YER114C	BOI2		DMA	1.8	1	1.4	0.565685	0.485427
YER115C	SPR6		DMA	1.5	1.2	1.35	0.212132	0.432959
YER116C	SLX8		DMA	0.5	0.5	0.5	0	-1
YER116C	SLX8	slx8-supp1	TSv6	0.713841	0.715472	0.714657	0.00115372	-0.484678
YER117W	RPL23B		DMA	1.2	1.2	1.2	0	0.263034
YER118C	SHO1		DMA	1.1	1.2	1.15	0.0707107	0.201634
YER119C	AVT6		DMA	1.1	1	1.05	0.0707107	0.0703893
YER119C-A	YER119C-A		DMA	0.8	0.8	0.8	0	-0.321928
YER120W	SCS2		DMA	0.8	0.8	0.8	0	-0.321928
YER121W	YER121W		DMA	1.1	1.1	1.1	0	0.137504
YER123W	YCK3		DMA	1.1	1.1	1.1	0	0.137504
YER124C	DSE1		DMA	1.1	1	1.05	0.0707107	0.0703893
YER125W	RSP5	rsp5-sm1	TSv6	0.814542	0.837167	0.825854	0.0159986	-0.276041
YER125W	RSP5	rsp5-1	TSv6	1.03834	0.982163	1.01025	0.0397225	0.0147144
YER125W	RSP5	rsp5-3	TSv6	1.48528	1.57141	1.52835	0.0609016	0.611973
YER128W	VFA1		DMA	1.2	1.2	1.2	0	0.263034
YER129W	SAK1		DMA	1.3	1.5	1.4	0.141421	0.485427
YER130C	COM2		DMA	1.1	1	1.05	0.0707107	0.0703893
YER131W	RPS26B		DMA	0.9	0.9	0.9	0	-0.152003
YER132C	PMD1		DMA	1	1	1	0	0
YER133W	GLC7	glc7-10	TSv6	0.897118	0.936361	0.916739	0.0277488	-0.125416
YER133W	GLC7	glc7-12	TSv6	0.940743	1.0148	0.97777	0.0523644	-0.0324323
YER134C	YER134C		DMA	1	1	1	0	0
YER135C	YER135C		DMA	0.7	0.8	0.75	0.0707107	-0.415037
YER136W	GDI1	gdi1-1	TSv6	1.28433	1.1435	1.21392	0.0995796	0.279668
YER137C	YER137C		DMA	1.1	1.1	1.1	0	0.137504
YER139C	RTR1		DMA	1	1	1	0	0
YER140W	EMP65		DMA	1.1	1.2	1.15	0.0707107	0.201634
YER142C	MAG1		DMA	1.2	1.2	1.2	0	0.263034
YER143W	DDI1		DMA	0.8	1.1	0.95	0.212132	-0.0740006	1
YER144C	UBP5		DMA	1.1	1	1.05	0.0707107	0.0703893
YER145C	FTR1		DMA	1	0.9	0.95	0.0707107	-0.0740006
YER147C	SCC4	yer147c-ph	TSv6	1.09169	1.11707	1.10438	0.017945	0.143241
YER147C	SCC4	scc4-4	TSv6	1.21451	1.32675	1.27063	0.0793687	0.345542
YER148W	SPT15	spt15-i143n	TSv6	0.908469	0.776294	0.842382	0.0934619	-0.247454
YER148W	SPT15	spt15-p65s	TSv6	1.30563	1.24795	1.27679	0.040786	0.352518
YER149C	PEA2		DMA	0.9	2.2	1.55	0.919239	0.632268
YER150W	SPI1		DMA	0.9	1.3	1.1	0.282843	0.137504
YER151C	UBP3		DMA	0.4	0.5	0.45	0.0707107	-1.152		1
YER152C	YER152C		DMA	0.9	0.9	0.9	0	-0.152003
YER153C	PET122		DMA	0.6	0.6	0.6	0	-0.736966
YER155C	BEM2		DMA	0.6	0.8	0.7	0.141421	-0.514573
YER156C	YER156C		DMA	0.9	0.8	0.85	0.0707107	-0.234465
YER157W	COG3	cog3-1	TSv6	1.07122	1.04049	1.05585	0.0217329	0.0784102
YER157W	COG3	cog3-2	TSv6	1.38145	1.46262	1.42203	0.0573982	0.507954
YER158C	YER158C		DMA	1.5	1.3	1.4	0.141421	0.485427
YER161C	SPT2		DMA	1	0.9	0.95	0.0707107	-0.0740006
YER162C	RAD4		DMA	0.5	0.3	0.4	0.141421	-1.32193
YER163C	GCG1		DMA	1.4	1.3	1.35	0.0707107	0.432959
YER164W	CHD1		DMA	1	0.9	0.95	0.0707107	-0.0740006
YER166W	DNF1		DMA	1.1	0.9	1	0.141421	0
YER167W	BCK2		DMA	0.8	0.9	0.85	0.0707107	-0.234465
YER168C	CCA1	cca1-1	TSv6	0.140612	0.253893	0.197253	0.0801017	-2.34188
YER168C	CCA1	cca1-ph	TSv6	1.12003	1.01595	1.06799	0.0735915	0.0948965
YER170W	ADK2		DMA	1.1	0.9	1	0.141421	0
YER171W	RAD3	rad3-ts14	TSv6	0.679231	0.877441	0.778336	0.140155	-0.361535
YER173W	RAD24		DMA	1.1	1	1.05	0.0707107	0.0703893
YER174C	GRX4		DMA	1	1.2	1.1	0.141421	0.137504
YER175C	TMT1		DMA	0.9	1	0.95	0.0707107	-0.0740006
YER176W	ECM32		DMA	1.1	1.1	1.1	0	0.137504
YER177W	BMH1		DMA	0.9	1.2	1.05	0.212132	0.0703893
YER178W	PDA1		DMA	0.8	0.9	0.85	0.0707107	-0.234465
YER179W	DMC1		DMA	1.6	1	1.3	0.424264	0.378512
YER180C	ISC10		DMA	1.1	1.6	1.35	0.353553	0.432959
YER181C	YER181C		DMA	1.6	1.4	1.5	0.141421	0.584963
YER182W	FMP10		DMA	1.3	1.1	1.2	0.141421	0.263034
YER183C	FAU1		DMA	1.5	1.8	1.65	0.212132	0.722466
YER184C	TOG1		DMA	1.4	1.1	1.25	0.212132	0.321928
YER185W	PUG1		DMA	1.5	1.2	1.35	0.212132	0.432959
YER186C	YER186C		DMA	1.2	1.2	1.2	0	0.263034
YER187W	YER187W		DMA	1.2	1.2	1.2	0	0.263034
YER188W	YER188W		DMA	1.3	1.9	1.6	0.424264	0.678072
YFL001W	DEG1		DMA	0.8	0.7	0.75	0.0707107	-0.415037
YFL003C	MSH4		DMA	1.5	1.5	1.5	0	0.584963
YFL004W	VTC2		DMA	1.3	1.2	1.25	0.0707107	0.321928
YFL005W	SEC4	sec4-8	TSv6	1.14521	1.20609	1.17565	0.0430432	0.233459
YFL006W	YFL006W		DMA	1.5	1.5	1.5	0	0.584963
YFL007W	BLM10		DMA	1	1	1	0	0
YFL008W	SMC1	smc1-259	TSv6	1.12567	1.12994	1.1278	0.0030158	0.173514
YFL008W	SMC1	smc1-2	TSv6	1.30795	1.18705	1.2475	0.0854867	0.319042
YFL009W	CDC4	cdc4-2	TSv6	0.203479	0.17507	0.189274	0.0200879	-2.40145
YFL009W	CDC4	cdc4-3	TSv6	1.17165	0.970794	1.07122	0.142028	0.0992588
YFL009W	CDC4	cdc4-1	TSv6	1.22695	0.91897	1.07296	0.217778	0.101599
YFL010C	WWM1		DMA	0.9	0.9	0.9	0	-0.152003
YFL010W-A	AUA1		DMA	1	1.3	1.15	0.212132	0.201634
YFL011W	HXT10		DMA	1.3	1.1	1.2	0.141421	0.263034
YFL012W	YFL012W		DMA	1.1	1.1	1.1	0	0.137504
YFL013C	IES1		DMA	1.1	1	1.05	0.0707107	0.0703893
YFL013W-A	YFL013W-A		DMA	0.9	1	0.95	0.0707107	-0.0740006
YFL014W	HSP12		DMA	1.6	1.2	1.4	0.282843	0.485427
YFL015C	YFL015C		DMA	1.9	1.1	1.5	0.565685	0.584963
YFL017C	GNA1	gna1-ts	TSv6	0.972631	0.767341	0.869986	0.145162	-0.200936
YFL017C	GNA1	yfl017c-ph	TSv6	1.34219	1.353	1.34759	0.00764361	0.430386	1
YFL018C	LPD1		DMA	0.9	0.9	0.9	0	-0.152003	1
YFL019C	YFL019C		DMA	1.2	1.2	1.2	0	0.263034
YFL020C	PAU5		DMA	1.2	1.1	1.15	0.0707107	0.201634
YFL021W	GAT1		DMA	1	1.2	1.1	0.141421	0.137504
YFL022C	FRS2	frs2-ph	TSv6	0.214144	0.30847	0.261307	0.0666984	-1.93618
YFL023W	BUD27		DMA	0.7	0.7	0.7	0	-0.514573
YFL025C	BST1		DMA	1.1	1	1.05	0.0707107	0.0703893
YFL026W	STE2		DMA	0.2	0.2	0.2	0	-2.32193
YFL027C	GYP8		DMA	1.5	1.6	1.55	0.0707107	0.632268
YFL028C	CAF16		DMA	2	2	2	0	1
YFL029C	CAK1	cak1-23	TSv6	1.22652	1.11371	1.17011	0.07977	0.226646
YFL030W	AGX1		DMA	1	1.3	1.15	0.212132	0.201634
YFL031W	HAC1		DMA	1	1	1	0	0
YFL032W	YFL032W		DMA	1.1	1.1	1.1	0	0.137504
YFL033C	RIM15		DMA	1.2	1.1	1.15	0.0707107	0.201634
YFL034C-A	RPL22B		DMA	1.1	1.2	1.15	0.0707107	0.201634
YFL034C-A	RPL22B		DMA	1.6	1	1.3	0.424264	0.378512
YFL034C-B	MOB2	mob2-26	TSv6	0.880504	0.842406	0.861455	0.0269394	-0.215153
YFL034C-B	MOB2	mob2-38	TSv6	1.24645	0.852265	1.04936	0.278733	0.0695094
YFL034C-B	MOB2	mob2-36	TSv6	0.982708	1.25808	1.12039	0.194718	0.164007
YFL034C-B	MOB2	mob2-28	TSv6	1.08339	1.20326	1.14333	0.0847617	0.193238	1
YFL034C-B	MOB2	mob2-20	TSv6	1.07569	1.23068	1.15318	0.109596	0.20562		1
YFL034C-B	MOB2	mob2-19	TSv6	1.29051	1.14154	1.21603	0.105343	0.282174
YFL034C-B	MOB2	mob2-24	TSv6	1.22213	1.26044	1.24129	0.0270876	0.311838
YFL034C-B	MOB2	mob2-11	TSv6	1.07835	1.45126	1.26481	0.263682	0.338916
YFL034C-B	MOB2	mob2-22	TSv6	1.29643	1.29649	1.29646	4.6556e-05	0.374579
YFL034C-B	MOB2	mob2-40	TSv6	1.31439	1.29878	1.30659	0.0110337	0.385802
YFL034C-B	MOB2	mob2-8	TSv6	1.41204	1.23271	1.32238	0.126802	0.403132
YFL034C-B	MOB2	mob2-14	TSv6	1.36558	1.41558	1.39058	0.0353533	0.475685
YFL034C-B	MOB2	mob2-34	TSv6	1.45596	1.71266	1.58431	0.181517	0.663854
YFL034W	MIL1		DMA	1	1.2	1.1	0.141421	0.137504
YFL036W	RPO41		DMA	0.7	0.6	0.65	0.0707107	-0.621488
YFL037W	TUB2	tub2-443	TSv6	1.70384	1.76813	1.73598	0.0454632	0.795754
YFL038C	YPT1	ypt1-3	TSv6	1.91245	1.31691	1.61468	0.421111	0.691245
YFL039C	ACT1	act1-120	TSv6	0.733888	0.665087	0.699487	0.0486494	-0.51563
YFL039C	ACT1	act1-125	TSv6	0.735349	0.68187	0.708609	0.0378156	-0.496938
YFL039C	ACT1	act1-105	TSv6	0.699266	0.762018	0.730642	0.0443724	-0.452764	1
YFL039C	ACT1	act1-159	TSv6	0.720219	0.802945	0.761582	0.0584962	-0.392928
YFL039C	ACT1	act1-3	TSv6	0.846467	0.738096	0.792281	0.0766301	-0.335915
YFL039C	ACT1	act1-112	TSv6	0.907968	0.714374	0.811171	0.136892	-0.301922
YFL039C	ACT1	act1-155	TSv6	0.798668	0.839532	0.8191	0.0288956	-0.287888
YFL039C	ACT1	act1-108	TSv6	0.866386	0.779424	0.822905	0.0614917	-0.281202
YFL039C	ACT1	act1-2	TSv6	0.869479	0.865085	0.867282	0.00310693	-0.205426	1
YFL039C	ACT1	act1-4	TSv6	0.89387	0.874777	0.884324	0.013501	-0.177353
YFL039C	ACT1	act1-133	TSv6	0.948391	0.960758	0.954575	0.00874479	-0.0670701
YFL039C	ACT1	act1-136	TSv6	0.951967	1.0017	0.976836	0.0351697	-0.0338123
YFL039C	ACT1	act1-132	TSv6	1.02247	0.9755	0.998984	0.0332123	-0.00146611
YFL039C	ACT1	act1-111	TSv6	1.02213	1.02199	1.02206	0.000104579	0.0314786
YFL039C	ACT1	act1-121	TSv6	1.13065	1.10209	1.11637	0.0201917	0.158818
YFL039C	ACT1	act1-124	TSv6	1.12684	1.19039	1.15862	0.0449356	0.212406
YFL039C	ACT1	act1-122	TSv6	1.12944	1.20251	1.16597	0.0516705	0.221537
YFL039C	ACT1	act1-129	TSv6	1.18874	1.30315	1.24594	0.0809007	0.317239
YFL039C	ACT1	act1-101	TSv6	1.43627	1.46613	1.4512	0.0211174	0.537245
YFL039C	ACT1	act1-119	TSv6	1.72193	1.37973	1.55083	0.241971	0.633043
YFL040W	YFL040W		DMA	1.3	1.3	1.3	0	0.378512
YFL041W	FET5		DMA	1.3	1.6	1.45	0.212132	0.536053
YFL042C	LAM5		DMA	1.8	1.5	1.65	0.212132	0.722466
YFL043C	YFL043C		DMA	1.6	1.3	1.45	0.212132	0.536053
YFL044C	OTU1		DMA	1.1	1	1.05	0.0707107	0.0703893
YFL045C	SEC53	sec53-6	TSv6	1.02454	0.974603	0.99957	0.0353082	-0.00062087	1
YFL046W	FMP32		DMA	1.3	1.1	1.2	0.141421	0.263034
YFL047W	RGD2		DMA	1.1	1.1	1.1	0	0.137504
YFL048C	EMP47		DMA	1.4	1.1	1.25	0.212132	0.321928
YFL049W	SWP82		DMA	1	1	1	0	0
YFL050C	ALR2		DMA	1	1.1	1.05	0.0707107	0.0703893
YFL051C	YFL051C		DMA	1.1	1	1.05	0.0707107	0.0703893
YFL052W	ZNF1		DMA	1.3	1.5	1.4	0.141421	0.485427
YFL053W	DAK2		DMA	1.7	1.3	1.5	0.282843	0.584963
YFL054C	YFL054C		DMA	1.3	1.6	1.45	0.212132	0.536053
YFL055W	AGP3		DMA	1.2	1.2	1.2	0	0.263034
YFL056C	AAD6		DMA	1	1.3	1.15	0.212132	0.201634
YFL063W	YFL063W		DMA	1.2	1.2	1.2	0	0.263034
YFR004W	RPN11	rpn11-8	TSv6	0.889476	0.868985	0.879231	0.0144894	-0.185686
YFR004W	RPN11	rpn11-14	TSv6	1.01101	1.15501	1.08301	0.10182	0.11505
YFR005C	SAD1	sad1-1	TSv6	1.02732	0.947685	0.987501	0.0563087	-0.0181452
YFR006W	YFR006W		DMA	1	1.1	1.05	0.0707107	0.0703893
YFR007W	YFH7		DMA	0.9	1.1	1	0.141421	0
YFR008W	FAR7		DMA	1.2	1.1	1.15	0.0707107	0.201634
YFR009W	GCN20		DMA	1	1.1	1.05	0.0707107	0.0703893
YFR010W	UBP6		DMA	0.8	0.9	0.85	0.0707107	-0.234465
YFR011C	MIC19		DMA	1	0.9	0.95	0.0707107	-0.0740006
YFR012W	DCV1		DMA	1	1	1	0	0
YFR013W	IOC3		DMA	0.9	1	0.95	0.0707107	-0.0740006
YFR014C	CMK1		DMA	1.3	1	1.15	0.212132	0.201634
YFR015C	GSY1		DMA	1.4	1.1	1.25	0.212132	0.321928
YFR016C	YFR016C		DMA	1.6	1.2	1.4	0.282843	0.485427
YFR017C	IGD1		DMA	1.2	1	1.1	0.141421	0.137504
YFR018C	YFR018C		DMA	1.1	1.2	1.15	0.0707107	0.201634
YFR019W	FAB1		DMA	0.8	0.7	0.75	0.0707107	-0.415037
YFR020W	YFR020W		DMA	1	1.2	1.1	0.141421	0.137504
YFR021W	ATG18		DMA	1	0.9	0.95	0.0707107	-0.0740006
YFR022W	ROG3		DMA	1.4	1.1	1.25	0.212132	0.321928
YFR023W	PES4		DMA	1.5	1.2	1.35	0.212132	0.432959
YFR024C	YFR024C		DMA	1.1	1	1.05	0.0707107	0.0703893
YFR024C-A	LSB3		DMA	1.3	1.4	1.35	0.0707107	0.432959
YFR025C	HIS2		DMA	0.3	0.3	0.3	0	-1.73697
YFR026C	ULI1		DMA	1.2	1	1.1	0.141421	0.137504
YFR027W	ECO1	eco1-1	TSv6	1.25077	1.2118	1.23128	0.0275511	0.300164
YFR028C	CDC14	cdc14-2	TSv6	1.00782	0.8419	0.92486	0.117322	-0.112693
YFR028C	CDC14	cdc14-3	TSv6	1.21325	1.18337	1.19831	0.0211226	0.261
YFR028C	CDC14	cdc14-8	TSv6	1.35092	1.21951	1.28521	0.0929174	0.362009
YFR028C	CDC14	cdc14-1	TSv6	1.35877	1.34726	1.35301	0.00813868	0.436174
YFR030W	MET10		DMA	1.1	1	1.05	0.0707107	0.0703893
YFR031C	SMC2	smc2-8	TSv6	0.299075	0.704152	0.501613	0.286432	-0.995352
YFR031C-A	RPL2A		DMA	1	0.9	0.95	0.0707107	-0.0740006
YFR032C	RRT5		DMA	1.3	1	1.15	0.212132	0.201634
YFR032C-A	RPL29		DMA	0.9	0.9	0.9	0	-0.152003
YFR033C	QCR6		DMA	1.1	1	1.05	0.0707107	0.0703893
YFR034C	PHO4		DMA	1.2	0.9	1.05	0.212132	0.0703893
YFR035C	YFR035C		DMA	1.2	1.2	1.2	0	0.263034
YFR036W	CDC26	cdc26-1	TSv6	1.25814	2.25691	1.75752	0.706234	0.813544
YFR037C	RSC8	rsc8-ts21	TSv6	1.22882	1.254	1.24141	0.0178097	0.311978
YFR037C	RSC8	rsc8-ts16	TSv6	1.62493	1.46817	1.54655	0.110848	0.62905
YFR038W	IRC5		DMA	1.1	1.1	1.1	0	0.137504
YFR039C	OSW7		DMA	1.1	1.4	1.25	0.212132	0.321928
YFR040W	SAP155		DMA	0.9	1	0.95	0.0707107	-0.0740006
YFR041C	ERJ5		DMA	1.7	0.8	1.25	0.636396	0.321928
YFR043C	IRC6		DMA	1.1	1.3	1.2	0.141421	0.263034
YFR044C	DUG1		DMA	1.1	1.2	1.15	0.0707107	0.201634
YFR045W	YFR045W		DMA	1.1	1.1	1.1	0	0.137504
YFR046C	CNN1		DMA	1.4	1.2	1.3	0.141421	0.378512
YFR047C	BNA6		DMA	1	1	1	0	0
YFR048W	RMD8		DMA	1.1	1.2	1.15	0.0707107	0.201634
YFR049W	YMR31		DMA	1.1	1.1	1.1	0	0.137504
YFR050C	PRE4	pre4-ph	TSv6	0.869991	0.76099	0.815491	0.0770753	-0.294259	1
YFR051C	RET2	ret2-1	TSv6	0.830891	0.990578	0.910735	0.112916	-0.134897
YFR052W	RPN12	rpn12-1	TSv6	0.834771	0.762006	0.798389	0.0514523	-0.324837	1
YFR053C	HXK1		DMA	1.5	1.2	1.35	0.212132	0.432959
YFR054C	YFR054C		DMA	1.4	1.5	1.45	0.0707107	0.536053
YFR055W	IRC7		DMA	1.3	1.6	1.45	0.212132	0.536053
YFR056C	YFR056C		DMA	1.4	1.3	1.35	0.0707107	0.432959
YFR057W	YFR057W		DMA	1.3	1.2	1.25	0.0707107	0.321928
YGL001C	ERG26	erg26-1	TSv6	1.2589	1.08196	1.17043	0.125116	0.227044
YGL002W	ERP6		DMA	1	1.1	1.05	0.0707107	0.0703893
YGL004C	RPN14		DMA	0.9	1.1	1	0.141421	0
YGL005C	COG7		DMA	1.2	1.1	1.15	0.0707107	0.201634
YGL006W	PMC1		DMA	1.2	1.1	1.15	0.0707107	0.201634
YGL007W	BRP1		DMA	0.8	0.9	0.85	0.0707107	-0.234465	1
YGL009C	LEU1		DMA	1.1	1.1	1.1	0	0.137504
YGL010W	MPO1		DMA	1.5	1.8	1.65	0.212132	0.722466
YGL011C	SCL1	scl1-ph	TSv6	1.23163	1.4928	1.36222	0.184674	0.445957
YGL013C	PDR1		DMA	1.1	1	1.05	0.0707107	0.0703893
YGL014W	PUF4		DMA	1.2	1.1	1.15	0.0707107	0.201634
YGL015C	YGL015C		DMA	1.2	1.2	1.2	0	0.263034
YGL016W	KAP122		DMA	0.9	0.9	0.9	0	-0.152003
YGL017W	ATE1		DMA	1.1	1	1.05	0.0707107	0.0703893
YGL019W	CKB1		DMA	0.9	1	0.95	0.0707107	-0.0740006
YGL020C	GET1		DMA	1	1	1	0	0
YGL021W	ALK1		DMA	1.1	1	1.05	0.0707107	0.0703893
YGL022W	STT3	stt3-1	TSv6	0.473109	0.423243	0.448176	0.0352602	-1.15786
YGL022W	STT3	stt3-2	TSv6	0.882984	0.618381	0.750682	0.187102	-0.413725
YGL022W	STT3	stt3-7	TSv6	0.838538	1.0387	0.938618	0.141533	-0.0913907
YGL023C	PIB2		DMA	1	1	1	0	0
YGL024W	YGL024W		DMA	0.4	0.4	0.4	0	-1.32193	1
YGL026C	TRP5		DMA	0.2	0.2	0.2	0	-2.32193
YGL027C	CWH41		DMA	1.3	1.3	1.3	0	0.378512
YGL028C	SCW11		DMA	1.1	1.1	1.1	0	0.137504
YGL029W	CGR1		DMA	0.9	0.9	0.9	0	-0.152003
YGL031C	RPL24A		DMA	0.9	0.8	0.85	0.0707107	-0.234465
YGL032C	AGA2		DMA	1.2	1.1	1.15	0.0707107	0.201634
YGL034C	YGL034C		DMA	1.1	1.1	1.1	0	0.137504
YGL035C	MIG1		DMA	1.1	1.1	1.1	0	0.137504
YGL036W	YGL036W		DMA	0.9	1	0.95	0.0707107	-0.0740006
YGL037C	PNC1		DMA	1.2	1.1	1.15	0.0707107	0.201634
YGL039W	YGL039W		DMA	0.9	1	0.95	0.0707107	-0.0740006
YGL041C	YGL041C		DMA	1.1	1.2	1.15	0.0707107	0.201634
YGL042C	YGL042C		DMA	0.9	1.1	1	0.141421	0
YGL043W	DST1		DMA	0.9	1	0.95	0.0707107	-0.0740006
YGL044C	RNA15	rna15-58	TSv6	0.981806	1.09732	1.03956	0.0816827	0.0559793
YGL045W	RIM8		DMA	0.2	0.2	0.2	0	-2.32193
YGL046W	YGL046W		DMA	0.9	0.9	0.9	0	-0.152003
YGL047W	ALG13	alg13-ph	TSv6	1.35851	1.35831	1.35841	0.000146116	0.44192
YGL048C	RPT6	rpt6-25	TSv6	0.826	0.739283	0.782642	0.0613184	-0.353576
YGL048C	RPT6	rpt6-1	TSv6	0.817534	0.880654	0.849094	0.0446329	-0.236004	1
YGL048C	RPT6	rpt6-20	TSv6	1.12769	1.14861	1.13815	0.0147969	0.18669
YGL049C	TIF4632		DMA	1.2	1	1.1	0.141421	0.137504
YGL050W	TYW3		DMA	1.2	1.2	1.2	0	0.263034
YGL051W	MST27		DMA	1.2	1.2	1.2	0	0.263034
YGL053W	PRM8		DMA	1.2	1.1	1.15	0.0707107	0.201634
YGL054C	ERV14		DMA	1	1	1	0	0
YGL055W	OLE1	ole1-m2	TSv6	0.996219	1.05232	1.02427	0.0396713	0.0345979
YGL056C	SDS23		DMA	1.1	1.1	1.1	0	0.137504
YGL057C	GEP7		DMA	0.8	0.8	0.8	0	-0.321928
YGL058W	RAD6		DMA	1.2	1.1	1.15	0.0707107	0.201634
YGL059W	PKP2		DMA	1.1	1.3	1.2	0.141421	0.263034
YGL060W	YBP2		DMA	0.9	1.2	1.05	0.212132	0.0703893
YGL061C	DUO1	duo1-2	TSv6	1.18488	1.3182	1.25154	0.0942719	0.323702
YGL062W	PYC1		DMA	1.3	1.2	1.25	0.0707107	0.321928
YGL063W	PUS2		DMA	1	1.1	1.05	0.0707107	0.0703893
YGL065C	ALG2	alg2-1	TSv6	1.12683	0.962213	1.04452	0.116403	0.0628439	1
YGL066W	SGF73		DMA	0.6	0.5	0.55	0.0707107	-0.862496
YGL067W	NPY1		DMA	1.1	1.1	1.1	0	0.137504
YGL071W	AFT1		DMA	0.9	1.1	1	0.141421	0
YGL073W	HSF1	hsf1-848	TSv6	0.514922	0.467036	0.490979	0.033861	-1.02627	1
YGL075C	MPS2	mps2-1	TSv6	0.505444	0.302699	0.404071	0.143362	-1.30732
YGL075C	MPS2	mps2-2	TSv6	0.550532	0.282866	0.416699	0.189269	-1.26292
YGL077C	HNM1		DMA	1.2	1.4	1.3	0.141421	0.378512
YGL078C	DBP3		DMA	0.8	0.8	0.8	0	-0.321928
YGL079W	KXD1		DMA	1.1	1.2	1.15	0.0707107	0.201634
YGL080W	MPC1		DMA	0.9	0.9	0.9	0	-0.152003
YGL081W	YGL081W		DMA	1.2	1.1	1.15	0.0707107	0.201634
YGL082W	YGL082W		DMA	1	1.1	1.05	0.0707107	0.0703893
YGL083W	SCY1		DMA	1	1.1	1.05	0.0707107	0.0703893
YGL084C	GUP1		DMA	0.8	0.8	0.8	0	-0.321928
YGL085W	LCL3		DMA	1	1.1	1.05	0.0707107	0.0703893
YGL086W	MAD1		DMA	1.1	1	1.05	0.0707107	0.0703893
YGL087C	MMS2		DMA	1	1.1	1.05	0.0707107	0.0703893
YGL089C	MF(ALPHA)2		DMA	1.2	1	1.1	0.141421	0.137504
YGL090W	LIF1		DMA	1.3	1.2	1.25	0.0707107	0.321928
YGL091C	NBP35	nbp35-ph	TSv6	0.786418	0.701642	0.74403	0.0599458	-0.426568
YGL092W	NUP145	nup145-r4	TSv6	1.5306	1.54793	1.53926	0.0122572	0.62224
YGL093W	SPC105	spc105-4	TSv6	1.19864	1.16257	1.18061	0.0255066	0.239527
YGL093W	SPC105	spc105-15	TSv6	1.16604	1.4099	1.28797	0.172432	0.3651
YGL094C	PAN2		DMA	1.1	1	1.05	0.0707107	0.0703893
YGL096W	TOS8		DMA	1.1	1	1.05	0.0707107	0.0703893
YGL097W	SRM1	srm1-g282s	TSv6	0.155795	0.195743	0.175769	0.0282471	-2.50825
YGL097W	SRM1	srm1-ts	TSv6	0.793374	0.831875	0.812625	0.0272244	-0.299339
YGL098W	USE1	use1-ts	TSv6	1.46227	1.66474	1.56351	0.143167	0.644786
YGL101W	YGL101W		DMA	1.3	1.3	1.3	0	0.378512
YGL104C	VPS73		DMA	0.9	1.1	1	0.141421	0
YGL105W	ARC1		DMA	0.1	0.2	0.15	0.0707107	-2.73697
YGL108C	YGL108C		DMA	1	1.1	1.05	0.0707107	0.0703893
YGL109W	YGL109W		DMA	1.2	1	1.1	0.141421	0.137504
YGL110C	CUE3		DMA	1	1	1	0	0
YGL112C	TAF6	taf6-ts	TSv6	0.966341	0.991407	0.978874	0.0177241	-0.0308048
YGL113W	SLD3	sld3-ph	TSv6	1.07893	1.06149	1.07021	0.0123355	0.097893		1
YGL114W	YGL114W		DMA	1	1.1	1.05	0.0707107	0.0703893
YGL115W	SNF4		DMA	0.9	0.8	0.85	0.0707107	-0.234465
YGL116W	CDC20	cdc20-1	TSv6	0.911136	0.725787	0.818461	0.131061	-0.289014
YGL116W	CDC20	cdc20-3	TSv6	1.48343	1.36396	1.42369	0.0844822	0.50964
YGL116W	CDC20	cdc20-2	TSv6	1.40728	1.4967	1.45199	0.063233	0.538031
YGL117W	YGL117W		DMA	1.4	1.6	1.5	0.141421	0.584963
YGL118C	YGL118C		DMA	1.5	1.7	1.6	0.141421	0.678072
YGL120C	PRP43	prp43-ts2	TSv6	1.16255	1.11503	1.13879	0.0336031	0.187498	1
YGL121C	GPG1		DMA	1.2	1	1.1	0.141421	0.137504
YGL124C	MON1		DMA	0.9	1	0.95	0.0707107	-0.0740006
YGL125W	MET13		DMA	1.2	1.1	1.15	0.0707107	0.201634
YGL126W	SCS3		DMA	1.2	1	1.1	0.141421	0.137504
YGL127C	SOH1		DMA	0.6	0.5	0.55	0.0707107	-0.862496
YGL130W	CEG1	ceg1-c354	TSv6	0.403306	0.141112	0.272209	0.185399	-1.87721
YGL130W	CEG1	ceg1-3	TSv6	0.980408	0.866862	0.923635	0.0802892	-0.114605		1
YGL130W	CEG1	ceg1-ts	TSv6	1.204	1.10392	1.15396	0.0707677	0.206593
YGL130W	CEG1	ceg1-34	TSv6	1.35754	1.31078	1.33416	0.0330681	0.415929
YGL131C	SNT2		DMA	1.1	1.2	1.15	0.0707107	0.201634
YGL132W	YGL132W		DMA	1.1	1.1	1.1	0	0.137504
YGL133W	ITC1		DMA	1.1	1.1	1.1	0	0.137504
YGL136C	MRM2		DMA	0.2	0.3	0.25	0.0707107	-2
YGL137W	SEC27	sec27-1	TSv6	1.33936	1.16903	1.25419	0.120442	0.326761
YGL138C	YGL138C		DMA	1.7	1.4	1.55	0.212132	0.632268
YGL139W	FLC3		DMA	1.2	1.1	1.15	0.0707107	0.201634
YGL140C	YGL140C		DMA	1.2	1.3	1.25	0.0707107	0.321928
YGL141W	HUL5		DMA	0.9	1	0.95	0.0707107	-0.0740006
YGL142C	GPI10	gpi10-ph	TSv6	0.74182	0.64285	0.692335	0.0699819	-0.530458	1
YGL144C	ROG1		DMA	1.2	1.1	1.15	0.0707107	0.201634
YGL145W	TIP20	tip20-5	TSv6	1.77496	1.49362	1.63429	0.198938	0.708663
YGL146C	RRT6		DMA	1.2	1.1	1.15	0.0707107	0.201634
YGL147C	RPL9A		DMA	0.9	0.8	0.85	0.0707107	-0.234465
YGL148W	ARO2		DMA	0.7	1	0.85	0.212132	-0.234465
YGL149W	YGL149W		DMA	0.9	1.1	1	0.141421	0
YGL151W	NUT1		DMA	0.7	0.8	0.75	0.0707107	-0.415037
YGL152C	YGL152C		DMA	1.2	1.1	1.15	0.0707107	0.201634
YGL153W	PEX14		DMA	1.1	1.2	1.15	0.0707107	0.201634
YGL154C	LYS5		DMA	0.4	0.4	0.4	0	-1.32193
YGL155W	CDC43	cdc43-2	TSv6	1.13586	1.06332	1.09959	0.0512948	0.136961
YGL156W	AMS1		DMA	1.1	1.1	1.1	0	0.137504
YGL157W	ARI1		DMA	1.1	1.1	1.1	0	0.137504
YGL158W	RCK1		DMA	1.1	1.1	1.1	0	0.137504
YGL159W	YGL159W		DMA	1.1	1.1	1.1	0	0.137504
YGL160W	AIM14		DMA	1	0.8	0.9	0.141421	-0.152003
YGL161C	YIP5		DMA	1.2	1.1	1.15	0.0707107	0.201634
YGL162W	SUT1		DMA	1.2	1.3	1.25	0.0707107	0.321928
YGL163C	RAD54		DMA	1	1	1	0	0
YGL164C	YRB30		DMA	1.2	1.5	1.35	0.212132	0.432959
YGL165C	YGL165C		DMA	1.3	1.4	1.35	0.0707107	0.432959
YGL166W	CUP2		DMA	1.4	1.2	1.3	0.141421	0.378512
YGL167C	PMR1		DMA	0.8	0.8	0.8	0	-0.321928
YGL168W	HUR1		DMA	0.8	0.8	0.8	0	-0.321928
YGL170C	SPO74		DMA	1.1	1	1.05	0.0707107	0.0703893
YGL173C	XRN1		DMA	0.5	0.5	0.5	0	-1
YGL174W	BUD13		DMA	0.6	0.6	0.6	0	-0.736966	1
YGL175C	SAE2		DMA	1.1	1.1	1.1	0	0.137504
YGL176C	YGL176C		DMA	1.5	1.5	1.5	0	0.584963
YGL177W	YGL177W		DMA	1.4	1.3	1.35	0.0707107	0.432959
YGL179C	TOS3		DMA	1.4	1.3	1.35	0.0707107	0.432959
YGL180W	ATG1		DMA	1.1	1.3	1.2	0.141421	0.263034
YGL181W	GTS1		DMA	1.3	1.1	1.2	0.141421	0.263034
YGL194C	HOS2		DMA	0.8	0.7	0.75	0.0707107	-0.415037
YGL195W	GCN1		DMA	0.9	0.9	0.9	0	-0.152003
YGL196W	DSD1		DMA	1	1.1	1.05	0.0707107	0.0703893
YGL197W	MDS3		DMA	1.1	1.1	1.1	0	0.137504
YGL198W	YIP4		DMA	1.2	1.1	1.15	0.0707107	0.201634
YGL199C	YGL199C		DMA	1.2	1.2	1.2	0	0.263034
YGL202W	ARO8		DMA	1.1	1	1.05	0.0707107	0.0703893
YGL203C	KEX1		DMA	1.1	1.2	1.15	0.0707107	0.201634
YGL205W	POX1		DMA	0.9	1.2	1.05	0.212132	0.0703893
YGL207W	SPT16	spt16-ts	TSv6	1.3606	1.3565	1.35855	0.00289919	0.442071
YGL208W	SIP2		DMA	1.1	1	1.05	0.0707107	0.0703893
YGL209W	MIG2		DMA	1	1.2	1.1	0.141421	0.137504
YGL210W	YPT32		DMA	1.2	1.1	1.15	0.0707107	0.201634
YGL211W	NCS6		DMA	0.8	1	0.9	0.141421	-0.152003
YGL212W	VAM7		DMA	0.8	0.8	0.8	0	-0.321928	1
YGL213C	SKI8		DMA	0.8	0.9	0.85	0.0707107	-0.234465
YGL214W	YGL214W		DMA	0.2	0.4	0.3	0.141421	-1.73697
YGL215W	CLG1		DMA	0.8	0.9	0.85	0.0707107	-0.234465
YGL216W	KIP3		DMA	0.9	1	0.95	0.0707107	-0.0740006
YGL217C	YGL217C		DMA	0.9	0.9	0.9	0	-0.152003
YGL218W	YGL218W		DMA	0.8	0.7	0.75	0.0707107	-0.415037		1
YGL219C	MDM34		DMA	0.9	1.1	1	0.141421	0
YGL219C	MDM34	mdm34-supp1	TSv6	1.20505	1.08762	1.14633	0.0830413	0.197028
YGL221C	NIF3		DMA	1	1.2	1.1	0.141421	0.137504
YGL222C	EDC1		DMA	1.2	1.1	1.15	0.0707107	0.201634
YGL224C	SDT1		DMA	1.1	1	1.05	0.0707107	0.0703893
YGL226C-A	OST5		DMA	1.1	1	1.05	0.0707107	0.0703893
YGL226W	MTC3		DMA	0.9	0.8	0.85	0.0707107	-0.234465
YGL227W	VID30		DMA	0.9	1	0.95	0.0707107	-0.0740006
YGL228W	SHE10		DMA	1.1	1	1.05	0.0707107	0.0703893
YGL229C	SAP4		DMA	1.3	1.1	1.2	0.141421	0.263034
YGL230C	YGL230C		DMA	1.1	1	1.05	0.0707107	0.0703893
YGL231C	EMC4		DMA	1.4	1.1	1.25	0.212132	0.321928
YGL232W	TAN1		DMA	1.1	0.9	1	0.141421	0
YGL233W	SEC15	sec15-1	TSv6	1.19761	1.22394	1.21078	0.0186197	0.275935
YGL234W	ADE5,7		DMA	1.2	1.1	1.15	0.0707107	0.201634
YGL235W	YGL235W		DMA	1	1.2	1.1	0.141421	0.137504
YGL236C	MTO1		DMA	1.1	1.1	1.1	0	0.137504
YGL237C	HAP2		DMA	1	1	1	0	0
YGL241W	KAP114		DMA	1.2	1	1.1	0.141421	0.137504
YGL242C	YGL242C		DMA	1	1	1	0	0
YGL243W	TAD1		DMA	1.2	1.3	1.25	0.0707107	0.321928
YGL244W	RTF1		DMA	0.8	0.7	0.75	0.0707107	-0.415037
YGL245W	GUS1	gus1-ph	TSv6	1.89574	1.4799	1.68782	0.294041	0.75516
YGL247W	BRR6	brr6-ph	TSv6	0.845257	0.777409	0.811333	0.0479761	-0.301634
YGL248W	PDE1		DMA	1.4	1.1	1.25	0.212132	0.321928
YGL249W	ZIP2		DMA	1.1	1.2	1.15	0.0707107	0.201634
YGL250W	RMR1		DMA	1.3	1.3	1.3	0	0.378512
YGL251C	HFM1		DMA	1.5	1.2	1.35	0.212132	0.432959
YGL252C	RTG2		DMA	0.3	0.4	0.35	0.0707107	-1.51457
YGL253W	HXK2		DMA	0.9	0.8	0.85	0.0707107	-0.234465
YGL254W	FZF1		DMA	1.1	1	1.05	0.0707107	0.0703893
YGL255W	ZRT1		DMA	1	1	1	0	0
YGL256W	ADH4		DMA	1.2	1.2	1.2	0	0.263034
YGL257C	MNT2		DMA	1.1	1.1	1.1	0	0.137504
YGL258W	VEL1		DMA	1.1	1	1.05	0.0707107	0.0703893
YGL259W	YPS5		DMA	1.3	1.5	1.4	0.141421	0.485427
YGL260W	YGL260W		DMA	1.1	1.4	1.25	0.212132	0.321928
YGL261C	PAU11		DMA	1.1	1.3	1.2	0.141421	0.263034
YGL262W	YGL262W		DMA	1.1	1.3	1.2	0.141421	0.263034
YGL263W	COS12		DMA	1.2	1.2	1.2	0	0.263034
YGR001C	EFM5		DMA	1	1.2	1.1	0.141421	0.137504
YGR002C	SWC4	swc4-4	TSv6	0.898322	0.885234	0.891778	0.00925419	-0.165244
YGR003W	CUL3		DMA	1.1	1	1.05	0.0707107	0.0703893
YGR004W	PEX31		DMA	1.1	1.1	1.1	0	0.137504
YGR005C	TFG2	tfg2-ph	TSv6	1.61413	1.47761	1.54587	0.0965311	0.62842
YGR006W	PRP18	prp18-1202	TSv6	0.818163	0.863181	0.840672	0.0318329	-0.250385
YGR006W	PRP18	prp18-ts	TSv6	1.1965	1.10766	1.15208	0.0628163	0.204243
YGR007W	ECT1		DMA	1	1	1	0	0
YGR008C	STF2		DMA	1	1.1	1.05	0.0707107	0.0703893
YGR009C	SEC9	sec9-4	TSv6	0.469724	0.380546	0.425135	0.063058	-1.23401
YGR010W	NMA2		DMA	1.1	0.9	1	0.141421	0
YGR011W	YGR011W		DMA	1.2	1.1	1.15	0.0707107	0.201634
YGR012W	YGR012W		DMA	1.3	1.1	1.2	0.141421	0.263034
YGR013W	SNU71	snu71-ph	TSv6	1.45692	1.41002	1.43347	0.033165	0.519514
YGR014W	MSB2		DMA	1.3	1.1	1.2	0.141421	0.263034
YGR015C	YGR015C		DMA	1.2	1.1	1.15	0.0707107	0.201634
YGR016W	YGR016W		DMA	1	1.1	1.05	0.0707107	0.0703893
YGR017W	YGR017W		DMA	1	1	1	0	0
YGR018C	YGR018C		DMA	1.1	1	1.05	0.0707107	0.0703893
YGR019W	UGA1		DMA	1.1	1.1	1.1	0	0.137504
YGR021W	YGR021W		DMA	1	1	1	0	0
YGR022C	YGR022C		DMA	1.1	1.1	1.1	0	0.137504
YGR023W	MTL1		DMA	1.3	1.5	1.4	0.141421	0.485427
YGR025W	YGR025W		DMA	1.4	1.2	1.3	0.141421	0.378512
YGR026W	YGR026W		DMA	1.1	1.3	1.2	0.141421	0.263034
YGR027C	RPS25A		DMA	1	1	1	0	0
YGR028W	MSP1		DMA	1	1	1	0	0
YGR031W	IMO32		DMA	1.1	1	1.05	0.0707107	0.0703893
YGR032W	GSC2		DMA	1	1.1	1.05	0.0707107	0.0703893
YGR033C	TIM21		DMA	1.2	1.1	1.15	0.0707107	0.201634
YGR034W	RPL26B		DMA	1.1	0.9	1	0.141421	0
YGR035C	YGR035C		DMA	0.9	1	0.95	0.0707107	-0.0740006
YGR037C	ACB1		DMA	1.1	1	1.05	0.0707107	0.0703893
YGR038W	ORM1		DMA	0.6	0.8	0.7	0.141421	-0.514573
YGR039W	YGR039W		DMA	1	1.3	1.15	0.212132	0.201634
YGR040W	KSS1		DMA	1	1.1	1.05	0.0707107	0.0703893
YGR041W	BUD9		DMA	1.1	1.1	1.1	0	0.137504
YGR042W	YGR042W		DMA	1.1	1.1	1.1	0	0.137504
YGR043C	NQM1		DMA	1.1	1.1	1.1	0	0.137504
YGR044C	RME1		DMA	1.1	1.3	1.2	0.141421	0.263034
YGR045C	YGR045C		DMA	1.5	1	1.25	0.353553	0.321928
YGR047C	TFC4	ygr047c-ph	TSv6	1.37421	1.35718	1.3657	0.0120386	0.449637
YGR048W	UFD1	ufd1-2	TSv6	1.86423	1.3974	1.63082	0.330096	0.705595
YGR049W	SCM4		DMA	1.2	1.1	1.15	0.0707107	0.201634
YGR050C	YGR050C		DMA	1.3	1.2	1.25	0.0707107	0.321928
YGR051C	YGR051C		DMA	1.2	1.1	1.15	0.0707107	0.201634
YGR052W	FMP48		DMA	1.1	1	1.05	0.0707107	0.0703893
YGR053C	YGR053C		DMA	1	1.1	1.05	0.0707107	0.0703893
YGR054W	YGR054W		DMA	1.1	1.2	1.15	0.0707107	0.201634
YGR055W	MUP1		DMA	1.3	1.1	1.2	0.141421	0.263034
YGR058W	PEF1		DMA	1	0.8	0.9	0.141421	-0.152003
YGR059W	SPR3		DMA	1	0.9	0.95	0.0707107	-0.0740006
YGR061C	ADE6		DMA	1.1	1	1.05	0.0707107	0.0703893
YGR066C	YGR066C		DMA	1.1	1.2	1.15	0.0707107	0.201634
YGR067C	YGR067C		DMA	1	1.1	1.05	0.0707107	0.0703893
YGR068C	ART5		DMA	1	1	1	0	0
YGR069W	YGR069W		DMA	1.1	1.2	1.15	0.0707107	0.201634
YGR070W	ROM1		DMA	1.2	1.2	1.2	0	0.263034
YGR071C	ENV11		DMA	1	1	1	0	0
YGR072W	UPF3		DMA	0.8	0.8	0.8	0	-0.321928
YGR074W	SMD1	smd1-1	TSv6	0.473766	0.49253	0.483148	0.0132684	-1.04946
YGR075C	PRP38	prp38-1	TSv6	1.37018	1.43022	1.4002	0.0424538	0.48563
YGR077C	PEX8		DMA	1	0.9	0.95	0.0707107	-0.0740006
YGR078C	PAC10		DMA	1	1	1	0	0
YGR079W	YGR079W		DMA	1	1.2	1.1	0.141421	0.137504
YGR080W	TWF1		DMA	1.2	0.9	1.05	0.212132	0.0703893
YGR081C	SLX9		DMA	0.7	0.6	0.65	0.0707107	-0.621488
YGR084C	MRP13		DMA	1.2	1.2	1.2	0	0.263034
YGR085C	RPL11B		DMA	0.8	0.8	0.8	0	-0.321928
YGR086C	PIL1		DMA	1	1.1	1.05	0.0707107	0.0703893
YGR087C	PDC6		DMA	1.1	1.2	1.15	0.0707107	0.201634
YGR088W	CTT1		DMA	1.2	1	1.1	0.141421	0.137504
YGR089W	NNF2		DMA	1.1	1.1	1.1	0	0.137504
YGR091W	PRP31	prp31-1	TSv6	1.3205	1.43147	1.37599	0.0784671	0.460466
YGR091W	PRP31	prp31-ts	TSv6	1.70147	1.60075	1.65111	0.0712187	0.723434
YGR092W	DBF2		DMA	0.6	0.6	0.6	0	-0.736966	1
YGR092W	DBF2	dbf2-2	TSv6	0.996602	0.988022	0.992312	0.00606671	-0.0111345	1
YGR092W	DBF2	dbf2-3	TSv6	1.13961	1.26544	1.20252	0.0889686	0.266067
YGR092W	DBF2	dbf2-1	TSv6	1.30853	3.22265	2.26559	1.35349	1.17989
YGR093W	DRN1		DMA	1.3	1.1	1.2	0.141421	0.263034
YGR094W	VAS1	ygr094w-ph	TSv6	1.50674	1.26318	1.38496	0.172224	0.469847
YGR096W	TPC1		DMA	1.1	1.1	1.1	0	0.137504
YGR097W	ASK10		DMA	0.6	0.7	0.65	0.0707107	-0.621488
YGR098C	ESP1	esp1-1	TSv6	1.23739	1.2414	1.23939	0.00283662	0.309633
YGR099W	TEL2	tel2-15	TSv6	1.33647	1.36396	1.35021	0.0194418	0.433187
YGR099W	TEL2	tel2-7	TSv6	1.57265	1.82206	1.69735	0.176355	0.763287
YGR100W	MDR1		DMA	1.3	1.2	1.25	0.0707107	0.321928
YGR101W	PCP1		DMA	0.9	0.9	0.9	0	-0.152003
YGR103W	NOP7	nop7-1	TSv6	1.19688	1.20832	1.2026	0.00809176	0.26616
YGR105W	VMA21		DMA	0.6	0.5	0.55	0.0707107	-0.862496
YGR106C	VOA1		DMA	1.1	1	1.05	0.0707107	0.0703893
YGR107W	YGR107W		DMA	1.1	1	1.05	0.0707107	0.0703893
YGR108W	CLB1		DMA	1.1	1	1.05	0.0707107	0.0703893
YGR109C	CLB6		DMA	1.1	1.2	1.15	0.0707107	0.201634
YGR110W	CLD1		DMA	1.2	1.3	1.25	0.0707107	0.321928
YGR111W	YGR111W		DMA	1	1.1	1.05	0.0707107	0.0703893
YGR113W	DAM1	dam1-19	TSv6	0.655409	0.820281	0.737845	0.116582	-0.43861	1
YGR113W	DAM1	dam1-9	TSv6	1.08532	1.13626	1.11079	0.0360232	0.151586
YGR113W	DAM1	dam1-11	TSv6	1.36577	1.368	1.36689	0.00157663	0.450895
YGR113W	DAM1	dam1-5	TSv6	1.30606	1.43618	1.37112	0.0920091	0.455357
YGR113W	DAM1	dam1-1	TSv6	1.57768	1.95616	1.76692	0.267631	0.821236
YGR116W	SPT6	spt6-14	TSv6	0.694471	0.745376	0.719923	0.0359955	-0.474085	1
YGR117C	YGR117C		DMA	1.1	1.1	1.1	0	0.137504
YGR118W	RPS23A		DMA	1	0.8	0.9	0.141421	-0.152003
YGR119C	NUP57	nup57-e17	TSv6	0.58951	0.621482	0.605496	0.022608	-0.723811	1
YGR120C	COG2	cog2-1	TSv6	1.49161	1.40652	1.44906	0.0601706	0.535121
YGR121C	MEP1		DMA	1.3	1.2	1.25	0.0707107	0.321928
YGR122C-A	YGR122C-A		DMA	1.3	1	1.15	0.212132	0.201634
YGR122W	YGR122W		DMA	0.9	1	0.95	0.0707107	-0.0740006
YGR122W	YGR122W	ygr122w	TSv6	1.36539	1.36461	1.365	0.000552575	0.448898
YGR123C	PPT1		DMA	1.3	1.5	1.4	0.141421	0.485427
YGR124W	ASN2		DMA	1.2	1.1	1.15	0.0707107	0.201634
YGR125W	YGR125W		DMA	1	0.9	0.95	0.0707107	-0.0740006
YGR125W	YGR125W	ygr125w	TSv6	1.58043	1.50787	1.54415	0.0513106	0.626812
YGR126W	YGR126W		DMA	1.1	1	1.05	0.0707107	0.0703893
YGR127W	YGR127W		DMA	1.1	1.1	1.1	0	0.137504
YGR129W	SYF2		DMA	1	1	1	0	0
YGR130C	YGR130C		DMA	1	1	1	0	0
YGR131W	FHN1		DMA	1.4	1.3	1.35	0.0707107	0.432959
YGR132C	PHB1		DMA	1.2	1.2	1.2	0	0.263034		1
YGR133W	PEX4		DMA	1.3	1.3	1.3	0	0.378512
YGR134W	CAF130		DMA	1.2	1.1	1.15	0.0707107	0.201634
YGR135W	PRE9		DMA	1	1	1	0	0
YGR136W	LSB1		DMA	1.1	1.2	1.15	0.0707107	0.201634
YGR137W	YGR137W		DMA	1.1	1.1	1.1	0	0.137504
YGR138C	TPO2		DMA	1.1	1.1	1.1	0	0.137504
YGR139W	YGR139W		DMA	1.1	1	1.05	0.0707107	0.0703893
YGR140W	CBF2	cbf2-1	TSv6	1.26595	1.33351	1.29973	0.0477698	0.378215
YGR140W	CBF2	cbf2-42	TSv6	1.43896	1.47942	1.45919	0.0286084	0.545166
YGR140W	CBF2	cbf2-2	TSv6	1.56343	1.51482	1.53912	0.0343689	0.62211
YGR141W	VPS62		DMA	1	1	1	0	0
YGR142W	BTN2		DMA	1	0.9	0.95	0.0707107	-0.0740006
YGR143W	SKN1		DMA	1	1.1	1.05	0.0707107	0.0703893
YGR144W	THI4		DMA	1.3	1.1	1.2	0.141421	0.263034
YGR146C	ECL1		DMA	1.3	1.3	1.3	0	0.378512
YGR148C	RPL24B		DMA	0.9	0.8	0.85	0.0707107	-0.234465
YGR149W	YGR149W		DMA	1.1	1.1	1.1	0	0.137504
YGR151C	YGR151C		DMA	1.3	1.3	1.3	0	0.378512
YGR152C	RSR1		DMA	1.1	1.1	1.1	0	0.137504
YGR153W	YGR153W		DMA	1	1.1	1.05	0.0707107	0.0703893
YGR154C	GTO1		DMA	1.1	1.3	1.2	0.141421	0.263034
YGR156W	PTI1	pti1-ts7	TSv6	1.23855	1.10068	1.16962	0.0974844	0.226035
YGR156W	PTI1	pti1-ts1	TSv6	1.35042	1.4966	1.42351	0.103365	0.509455
YGR157W	CHO2		DMA	0.8	0.7	0.75	0.0707107	-0.415037		1
YGR158C	MTR3	mtr3-ts	TSv6	0.560781	0.562902	0.561841	0.00150004	-0.831765
YGR161C	RTS3		DMA	1.1	1	1.05	0.0707107	0.0703893
YGR163W	GTR2		DMA	0.9	1	0.95	0.0707107	-0.0740006
YGR164W	YGR164W		DMA	1	0.9	0.95	0.0707107	-0.0740006
YGR166W	TRS65		DMA	0.9	1.1	1	0.141421	0
YGR168C	YGR168C		DMA	1	1	1	0	0
YGR169C	PUS6		DMA	1.3	1.1	1.2	0.141421	0.263034
YGR170W	PSD2		DMA	1	1	1	0	0
YGR172C	YIP1	yip1-40	TSv6	1.40268	1.36407	1.38337	0.0272985	0.468191
YGR172C	YIP1	yip1-4	TSv6	1.39544	1.46192	1.42868	0.0470116	0.514684
YGR172C	YIP1	yip1-ph	TSv6	1.41907	1.54757	1.48332	0.0908646	0.568832
YGR173W	RBG2		DMA	1.3	1.3	1.3	0	0.378512
YGR174C	CBP4		DMA	0.9	0.8	0.85	0.0707107	-0.234465
YGR176W	YGR176W		DMA	1.5	1.1	1.3	0.282843	0.378512
YGR177C	ATF2		DMA	1.3	1.1	1.2	0.141421	0.263034
YGR178C	PBP1		DMA	1.1	1.1	1.1	0	0.137504
YGR179C	OKP1	okp1-5	TSv6	1.16156	1.16527	1.16341	0.00262333	0.218364
YGR181W	TIM13		DMA	1	1.3	1.15	0.212132	0.201634
YGR182C	YGR182C		DMA	1	1.1	1.05	0.0707107	0.0703893
YGR183C	QCR9		DMA	1	1	1	0	0
YGR184C	UBR1		DMA	1.3	1	1.15	0.212132	0.201634
YGR185C	TYS1	tys1-1	TSv6	1.09157	1.13063	1.1111	0.0276175	0.151987
YGR187C	HGH1		DMA	1.3	0.9	1.1	0.282843	0.137504
YGR188C	BUB1		DMA	0.6	0.6	0.6	0	-0.736966
YGR189C	CRH1		DMA	1.1	1.2	1.15	0.0707107	0.201634
YGR192C	TDH3		DMA	0.9	0.9	0.9	0	-0.152003
YGR193C	PDX1		DMA	1.2	1	1.1	0.141421	0.137504
YGR194C	XKS1		DMA	1	1.2	1.1	0.141421	0.137504
[truncated: 3,096 more rows]
