# Supplementary material for: Genetic profiling of protein burden and nuclear export overload
Source: eLife journal article supplement (doi:10.7554/elife.54080), 2020-11-04
Supplement: supp [file elife-54080-supp-v1.zip › elife_poa_e54080_Figure_5_source_data_1.xlsx]

## Sheet: DMA U Rep1
Array ORF	Array Name	Array annotation	Normalized colony size (EXPERIMENT)	Normalized colony std. dev. (EXPERIMENT)	Normalized colony size (CONTROL)	Normalized colony std. dev. (CONTROL)	Score	Score stdev	p-Value	Additional information
YAL002W	VPS8		0.84519	0.078	0.85791	0.204	-0.01776	0.078	0.00022
YAL004W	YAL004W		1.04321	0.06	1.04076	0.029	0.0078	0.06	5e-05
YAL005C	SSA1		0.97503	0.062	0.93947	0.064	0.04647	0.062	7e-05
YAL007C	ERP2		1.0703	0.054	1.08415	0.038	-0.0046	0.054	4e-05
YAL008W	FUN14		1.17691	0.041	1.17399	0.046	0.00263	0.041	1e-05
YAL010C	MDM10		0.782	0.007	0.8357	0.012	-0.04795	0.007	2e-05	status=JK
YAL011W	SWC3		0.88148	0.015	0.91146	0.043	-0.03296	0.015	0
YAL013W	DEP1		0.79339	0.014	0.81129	0.054	-0.00591	0.014	0.00011	status=JK
YAL014C	SYN8		1.00254	0.135	1.0351	0.084	-0.03162	0.135	0.00066
YAL015C	NTG1		1.01826	0.085	1.00493	0.05	-0.00235	0.085	0.00016
YAL017W	PSK1		1.06988	0.027	1.08788	0.015	-0.016	0.027	0
YAL018C	YAL018C		1.01365	0.094	0.9817	0.049	0.02429	0.093	0.00022
YAL019W	FUN30		0.94517	0.074	0.92567	0.018	0.01904	0.074	0.00013
YAL020C	ATS1		1.01523	0.015	1.06093	0.016	-0.05501	0.015	8e-05	status=JK
YAL022C	FUN26		0.98811	0.028	0.96009	0.039	0.03059	0.028	1e-05
YAL023C	PMT2		1.10579	0.015	1.08739	0.047	0.0111	0.015	6e-05	status=JK
YAL024C	LTE1		0.75874	0.101	0.8918	0.128	-0.17617	0.101	0.00064
YAL026C	DRS2		0.67282	0.037	0.63636	0.072	0.04505	0.037	5e-05
YAL027W	SAW1		1.01629	0.027	0.99956	0.036	0.02112	0.027	0
YAL028W	FRT2		0.95094	0.062	0.95725	0.076	-0.02494	0.061	7e-05
YAL029C	MYO4		1.05133	0.096	1.03924	0.076	0.00243	0.095	0.00021
YAL030W	SNC1		0.9607	0.052	0.95301	0.021	0.00763	0.052	4e-05
YAL031C	GIP4		1.00543	0.05	1.01634	0.012	-0.0046	0.05	3e-05
YAL034C	FUN19		1.04113	0.022	0.95769	0.152	0.10329	0.022	0
YAL036C	RBG1		1.09345	0.011	1.06017	0.046	0.04324	0.011	3e-05	status=JK
YAL037W	YAL037W		1.07549	0.061	1.03853	0.133	0.0211	0.061	5e-05
YAL040C	CLN3		0.84795	0.031	0.92343	0.031	-0.07519	0.031	1e-05
YAL042W	ERV46		1.0356	0.013	1.06483	0.023	-0.03896	0.013	0
YAL043C-A	YAL043C-A		0.96862	0.038	0.99397	0.049	-0.01415	0.038	2e-05
YAL045C	YAL045C		0.95014	0.068	0.96661	0.117	-0.03944	0.067	0.0001
YAL046C	AIM1		1.03204	0.013	1.04238	0.015	-0.00652	0.013	0
YAL048C	GEM1		0.90463	0.042	0.89979	0.037	-0.00026	0.042	3e-05
YAL049C	AIM2		0.95356	0.075	0.94769	0.104	-0.02075	0.075	0.00013
YAL051W	OAF1		0.91577	0.061	0.88714	0.026	0.0322	0.061	8e-05
YAL053W	FLC2		0.98603	0.077	1.06991	0.011	-0.08962	0.077	0.00013
YAL054C	ACS1		1.06998	0.007	1.04726	0.075	0.0346	0.007	1e-05	status=JK
YAL055W	PEX22		0.96013	0.049	0.92501	0.145	0.00444	0.049	0.00087	status=JK
YAL056W	GPB2		0.9702	0.106	0.9634	0.015	0.01491	0.106	0.00035
YAL058C-A	YAL058C-A		0.95197	0.029	0.98655	0.009	-0.03726	0.029	1e-05
YAL058W	CNE1		0.96904	0.042	0.98236	0.08	-0.01863	0.041	2e-05
YAL059W	ECM1		0.94478	0.062	0.9986	0.085	-0.04451	0.062	8e-05
YAL060W	BDH1		1.03111	0.005	1.03103	0.05	0.00115	0.005	1e-05	status=JK
YAL061W	BDH2		1.0416	0.009	1.05297	0.09	-0.01159	0.009	3e-05	status=JK
YAL062W	GDH3		1.06033	0.054	1.09271	0.185	-0.02727	0.054	4e-05
YAL064C-A	TDA8		1.07915	0.091	1.17628	0.048	-0.11064	0.091	0.00017
YAL065C	YAL065C		1.05191	0.049	1.09393	0.058	-0.0423	0.049	3e-05
YAL066W	YAL066W		1.0029	0.049	0.97061	0.068	0.02505	0.049	3e-05
YAL067C	SEO1		0.89163	0.039	0.98043	0.058	-0.0764	0.039	0.00064	status=JK
YAL068C	PAU8		1.01302	0.11	1.10281	0.102	-0.08019	0.11	0.00035
YAR002C-A	ERP1		1.02938	0.045	1.08617	0.006	-0.05772	0.045	2e-05
YAR002W	NUP60		0.98667	0.063	0.96813	0.073	0.00247	0.063	7e-05
YAR003W	SWD1		0.86458	0.047	0.89999	0.037	-0.03633	0.047	5e-05
YAR014C	BUD14		0.7569	0.007	0.91526	0.013	-0.1544	0.007	3e-05	status=JK
YAR015W	ADE1		1.00214	0.059	1.002	0.046	0.00396	0.059	6e-05
YAR018C	KIN3		0.84525	0.028	0.80024	0.117	0.02292	0.028	1e-05
YAR020C	PAU7		1.03198	0.093	0.9557	0.101	0.09912	0.093	0.0002
YAR023C	YAR023C		1.17661	0.115	1.14194	0.102	0.03957	0.115	0.00025
YAR027W	UIP3		0.9676	0.104	1.00804	0.115	-0.04196	0.103	0.00033
YAR028W	YAR028W		0.96031	0.103	0.94948	0.091	-0.00513	0.102	0.00033
YAR029W	YAR029W		1.02913	0.067	0.92124	0.012	0.11153	0.067	8e-05
YAR030C	YAR030C		0.98191	0.036	0.99377	0.086	-0.01964	0.036	1e-05
YAR031W	PRM9		0.99354	0.02	1.01119	0.025	-0.00948	0.02	0
YAR035W	YAT1		1.00736	0.077	1.02569	0.034	-0.0296	0.076	0.00012
YAR037W	YAR037W		1.08892	0.095	1.13816	0.05	-0.06313	0.095	0.00018
YAR040C	YAR040C		0.9935	0.114	1.05909	0.08	-0.07267	0.114	0.00041
YAR042W	SWH1		1.02629	0.037	1.02989	0.03	-0.00166	0.037	1e-05
YAR043C	YAR043C		0.95491	0.136	0.99086	0.112	-0.05272	0.136	0.00078
YAR044W	YAR044W		1.0076	0.082	1.10051	0.027	-0.0813	0.081	0.00015
YAR047C	YAR047C		0.97067	0.015	0.89744	0.009	0.07729	0.015	8e-05	status=JK
YAR050W	FLO1		1.02735	0.089	1.0769	0.044	-0.03804	0.089	0.00018
YBL001C	ECM15		1.09203	0.063	1.16935	0.049	-0.07945	0.063	5e-05
YBL003C	HTA2		1.09959	0.039	0.982	0.229	0.06687	0.039	0.00041	status=JK
YBL005W	PDR3		1.04757	0.03	1.00835	0.157	-0.00036	0.03	1e-05
YBL007C	SLA1		0.80223	0.037	0.83682	0.108	-0.04221	0.036	0.00069	status=JK
YBL008W	HIR1		0.93065	0.094	0.82326	0.195	0.10617	0.093	0.00028
YBL009W	ALK2		1.0159	0.019	0.92083	0.082	0.10504	0.019	0.00012	status=JK
YBL010C	YBL010C		1.12449	0.028	1.0076	0.027	0.11424	0.028	0.0002	status=JK
YBL011W	SCT1		0.79426	0.03	0.70788	0.188	0.0939	0.03	1e-05
YBL013W	FMT1		0.98558	0.167	0.84278	0.157	0.18103	0.167	0.00131
YBL015W	ACH1		1.02856	0.069	1.04979	0.076	-0.01011	0.068	8e-05
YBL016W	FUS3		0.84548	0.063	1.01189	0.024	-0.15681	0.062	0.00011
YBL017C	PEP1		1.01439	0.094	1.00427	0.032	-0.00597	0.093	0.00021
YBL019W	APN2		1.01377	0.029	1.04007	0.086	-0.02602	0.029	1e-05
YBL021C	HAP3		0.86753	0.038	0.92033	0.041	-0.06576	0.038	2e-05
YBL024W	NCL1		1.14777	0.084	1.06717	0.084	0.0702	0.084	0.00011
YBL025W	RRN10		0.82045	0.016	0.80644	0.034	0.02227	0.016	0
YBL027W	RPL19B		0.49436	0.086	0.43584	0.154	0.03562	0.086	0.0014
YBL028C	YBL028C		1.12213	0.089	1.07304	0.04	0.05414	0.089	0.00014
YBL029W	YBL029W		1.12813	0.123	1.14014	0.076	-0.03089	0.122	0.00035
YBL031W	SHE1		0.16518	0.095	0.46818	0.33	-0.38401	0.095	0.03986
YBL032W	HEK2		1.06699	0.02	1.08507	0.031	-0.02179	0.02	0
YBL036C	YBL036C		1.00605	0.09	1.04982	0.049	-0.04893	0.09	0.0002
YBL037W	APL3		0.97718	0.044	1.00319	0.046	-0.02744	0.044	3e-05
YBL039C	URA7		0.90161	0.029	0.86275	0.049	0.03492	0.029	1e-05
YBL042C	FUI1		1.07394	0.034	1.08319	0.031	-0.00797	0.034	1e-05
YBL043W	ECM13		1.01393	0.035	1.01346	0.024	-0.00478	0.035	1e-05
YBL046W	PSY4		1.24036	0.007	1.15292	0.024	0.08473	0.007	1e-05	status=JK
YBL047C	EDE1		0.96952	0.073	0.95146	0.019	0.01009	0.073	0.00012
YBL048W	YBL048W		1.10828	0.072	1.09394	0.042	0.01134	0.072	8e-05
YBL049W	MOH1		0.91229	0.078	0.98051	0.091	-0.0899	0.078	0.00017
YBL051C	PIN4		0.84991	0.011	0.90337	0.032	-0.04608	0.011	5e-05	status=JK
YBL052C	SAS3		1.03009	0.025	1.07205	0.059	-0.03112	0.025	0
YBL053W	YBL053W		0.94269	0.048	0.9556	0.088	-0.01293	0.048	4e-05
YBL054W	TOD6		1.05793	0.012	1.04649	0.071	0.02177	0.012	5e-05	status=JK
YBL055C	YBL055C		0.94442	0.041	0.95007	0.055	-0.00069	0.041	2e-05
YBL056W	PTC3		1.06261	0.027	0.9723	0.137	0.06293	0.027	0
YBL057C	PTH2		1.07196	0.008	1.07785	0.016	-0.00503	0.008	2e-05	status=JK
YBL059W	YBL059W		0.92689	0.006	0.87902	0.076	0.04335	0.006	1e-05	status=JK
YBL060W	YEL1		0.98786	0.085	0.94209	0.028	0.05606	0.085	0.00017
YBL061C	SKT5		0.97903	0.056	1.06371	0.037	-0.07156	0.056	5e-05
YBL062W	YBL062W		1.00774	0.077	1.07446	0.023	-0.06825	0.077	0.00012
YBL063W	KIP1		1.04564	0.028	1.07226	0.027	-0.03274	0.028	1e-05
YBL064C	PRX1		1.00807	0.073	0.9665	0.064	0.0415	0.073	0.00011
YBL065W	YBL065W		1.02434	0.033	1.13775	0.048	-0.1102	0.033	0.00035	status=JK
YBL066C	SEF1		0.89177	0.046	0.83668	0.168	0.04834	0.046	4e-05
YBL067C	UBP13		1.06056	0.026	0.96057	0.105	0.09881	0.026	0.00021	status=JK
YBL068W	PRS4		1.04006	0.025	1.04005	0.025	-0.00207	0.025	0
YBL069W	AST1		0.98496	0.06	0.98487	0.062	-0.02206	0.06	6e-05
YBL070C	YBL070C		1.00723	0.035	0.85964	0.057	0.13953	0.035	1e-05
YBL071C	YBL071C		0.96381	0.092	1.05214	0.051	-0.11283	0.092	0.00024
YBL072C	RPS8A		0.39623	0.068	0.38863	0.091	-0.01542	0.068	0.00136
YBL075C	SSA3		1.00198	0.119	0.98342	0.034	0.01324	0.119	0.00045
YBL078C	ATG8		0.88481	0.114	0.86194	0.016	0.02661	0.114	0.00059
YBL079W	NUP170		0.64129	0.027	0.59458	0.02	0.04587	0.027	0.00058	status=JK
YBL081W	YBL081W		0.98899	0.098	0.96558	0.102	0.02039	0.098	0.00027
YBL082C	ALG3		1.11346	0.118	1.10265	0.01	0.01592	0.118	0.00032
YBL083C	YBL083C		1.07014	0.036	1.00153	0.104	0.06293	0.036	1e-05
YBL085W	BOI1		1.07401	0.025	1.04356	0.006	0.03	0.025	0
YBL086C	YBL086C		1.07234	0.045	1.12151	0.039	-0.05836	0.045	2e-05
YBL087C	RPL23A		0.81322	0.073	0.8277	0.121	-0.04122	0.072	0.00019
YBL088C	TEL1		1.20163	0.012	1.18084	0.08	0.01282	0.012	0
YBL089W	AVT5		0.79453	0.024	0.81967	0.081	-0.03362	0.024	1e-05
YBL091C	MAP2		1.07469	0.044	1.08978	0.068	0.00229	0.043	2e-05
YBL091C-A	SCS22		0.89942	0.116	1.01687	0.03	-0.11745	0.116	0.00058
YBL094C	YBL094C		0.8417	0.143	0.7821	0.225	0.0233	0.143	0.00953	status=JK
YBL095W	YBL095W		1.00178	0.027	1.04018	0.015	-0.03544	0.027	1e-05
YBL096C	YBL096C		0.9985	0.083	1.04074	0.014	-0.04065	0.083	0.00016
YBL098W	BNA4		0.95019	0.072	0.94459	0.066	0.02267	0.072	0.00012
YBL100C	YBL100C		0.98285	0.013	1.00257	0.044	-0.02181	0.013	6e-05	status=JK
YBL101C	ECM21		1.00897	0.03	0.95087	0.082	0.08222	0.03	1e-05
YBL102W	SFT2		1.02299	0.07	1.02567	0.05	0.00837	0.07	9e-05
YBL103C	RTG3		1.04452	0.032	1.05477	0.015	-0.00976	0.032	1e-05
YBL103C	RTG3		0.50753	0.072	0.52711	0.072	-0.01489	0.071	0.00076
YBL104C	SEA4		0.98047	0.08	0.85968	0.016	0.1136	0.08	0.00015
YBL106C	SRO77		0.98391	0.025	1.00181	0.028	-0.01368	0.025	0
YBL107C	MIC23		0.98035	0.08	0.99314	0.046	-0.00734	0.079	0.00015
YBR001C	NTH2		1.00834	0.076	1.02854	0.041	-0.01555	0.075	0.00012
YBR005W	RCR1		1.04499	0.008	1.11703	0.047	-0.08002	0.008	2e-05	status=JK
YBR006W	UGA2		1.06935	0.12	1.15559	0.131	-0.08106	0.12	0.00039
YBR007C	DSF2		1.04218	0.052	1.15318	0.12	-0.11287	0.052	0.00083	status=JK
YBR008C	FLR1		1.0755	0.028	1.07521	0.186	-0.02321	0.028	0.00023	status=JK
YBR009C	HHF1		0.90444	0.04	0.91374	0.113	0.01384	0.04	2e-05
YBR010W	HHT1		0.91653	0.097	0.91702	0.145	-0.02188	0.097	0.00033
YBR012C	YBR012C		0.9427	0.006	0.90555	0.15	0.03823	0.006	1e-05	status=JK
YBR013C	YBR013C		1.03457	0.071	1.01349	0.182	0.01283	0.071	9e-05
YBR014C	GRX7		0.92988	0.162	0.83492	0.225	0.0656	0.162	0.00142
YBR015C	MNN2		0.9311	0.119	1.00514	0.121	-0.10018	0.119	0.00057
YBR016W	YBR016W		1.0943	0.021	1.13183	0.034	-0.02194	0.021	0
YBR018C	GAL7		0.97813	0.08	0.92629	0.13	0.06899	0.079	0.00015
YBR019C	GAL10		0.98932	0.078	0.89084	0.224	0.12018	0.077	0.00013
YBR020W	GAL1		0.97825	0.07	0.9714	0.016	0.00739	0.07	0.0001
YBR020W	GAL1		1.0257	0.071	1.11399	0.037	-0.07696	0.071	9e-05
YBR022W	POA1		1.03701	0.029	0.99864	0.017	0.03448	0.029	1e-05
YBR023C	CHS3		1.01273	0.052	1.05476	0.021	-0.03853	0.052	4e-05
YBR024W	SCO2		1.04175	0.034	1.06802	0.062	-0.03024	0.034	1e-05
YBR025C	OLA1		0.90653	0.073	0.94503	0.043	-0.03761	0.073	0.00014
YBR026C	ETR1		0.85317	0.008	0.85242	0.029	-0.00166	0.008	3e-05	status=JK
YBR027C	YBR027C		1.16193	0.066	1.15637	0.012	0.00714	0.065	5e-05
YBR028C	YPK3		1.03683	0.029	1.00364	0.117	0.01691	0.029	1e-05
YBR030W	RKM3		1.10032	0.03	1.02298	0.091	0.0676	0.03	0.00025	status=JK
YBR031W	RPL4A		1.03459	0.023	1.11315	0.03	-0.0686	0.023	0.00016	status=JK
YBR032W	YBR032W		1.01696	0.004	1.00894	0.018	0.01121	0.004	0
YBR033W	EDS1		1.01054	0.07	1.01887	0.017	-0.00973	0.07	9e-05
YBR034C	HMT1		0.92392	0.024	0.92957	0.023	-0.00786	0.024	1e-05
YBR036C	CSG2		0.73558	0.037	0.73679	0.021	-0.00217	0.037	3e-05
YBR040W	FIG1		1.15593	0.038	1.14482	0.036	0.00529	0.038	0.00036	status=JK
YBR041W	FAT1		0.96132	0.03	1.03722	0.045	-0.07139	0.03	0.00032	status=JK
YBR042C	CST26		1.01873	0.006	1.05149	0.015	-0.03464	0.006	1e-05	status=JK
YBR043C	QDR3		1.04795	0.011	1.03882	0.008	0.00897	0.011	3e-05	status=JK
YBR044C	TCM62		0.97428	0.004	1.00481	0.052	-0.04555	0.004	1e-05	status=JK
YBR045C	GIP1		0.98058	0.037	0.97585	0.01	0.00988	0.037	1e-05
YBR046C	ZTA1		0.98126	0.066	1.04564	0.031	-0.0726	0.066	8e-05
YBR047W	FMP23		0.98582	0.008	1.01647	0.156	-0.06618	0.008	2e-05	status=JK
YBR048W	RPS11B		0.77364	0.016	0.78815	0.033	-0.02188	0.016	0
YBR050C	REG2		1.01594	0.004	0.97318	0.118	0.01714	0.004	1e-05	status=JK
YBR051W	YBR051W		1.11254	0.032	1.08503	0.037	0.02558	0.032	1e-05
YBR052C	RFS1		1.03672	0.008	1.01067	0.093	0.01927	0.008	2e-05	status=JK
YBR053C	YBR053C		1.08754	0.039	1.1214	0.032	-0.03062	0.038	1e-05
YBR054W	YRO2		1.02754	0.037	0.92214	0.117	0.10551	0.037	0.00043	status=JK
YBR056W	YBR056W		1.02638	0.068	0.996	0.086	0.02055	0.068	8e-05
YBR057C	MUM2		0.98278	0.026	0.97645	0.014	0.0027	0.026	0.00023	status=JK
YBR058C	UBP14		0.92689	0.035	0.90422	0.004	0.02025	0.035	0.00048	status=JK
YBR059C	AKL1		0.92544	0.004	0.91848	0.141	0.01275	0.004	1e-05	status=JK
YBR061C	TRM7		0.52518	0.005	0.6062	0.029	-0.08185	0.005	3e-05	status=JK
YBR061C	TRM7		0.9649	0.096	1.02155	0.055	-0.06371	0.096	0.00027
YBR062C	YBR062C		1.03834	0.005	0.97135	0.048	0.06343	0.005	1e-05	status=JK
YBR063C	YBR063C		0.99005	0.028	1.0088	0.071	-0.02582	0.028	1e-05
YBR064W	YBR064W		1.13896	0.032	1.16486	0.046	-0.01292	0.032	1e-05
YBR065C	ECM2		1.02057	0.011	1.05879	0.064	-0.02107	0.011	4e-05	status=JK
YBR066C	NRG2		1.04952	0.057	1.05083	0.059	0.01208	0.057	4e-05
YBR067C	TIP1		1.05919	0.033	1.08281	0.158	0.00459	0.032	1e-05
YBR068C	BAP2		1.04142	0.063	1.13437	0.032	-0.08499	0.063	6e-05
YBR069C	TAT1		1.08192	0.092	1.02064	0.132	0.04691	0.092	0.00017
YBR071W	YBR071W		0.95997	0.028	0.94614	0.039	0.01887	0.028	1e-05
YBR072W	HSP26		1.0869	0.066	1.09557	0.041	-0.01001	0.065	6e-05
YBR073W	RDH54		1.01426	0.043	1.0096	0.022	0.0148	0.043	2e-05
YBR074W	YBR074W		0.99377	0.055	1.01207	0.013	-0.01598	0.055	5e-05
YBR075W	YBR075W		0.97779	0.003	1.0477	0.067	-0.07866	0.003	0	status=JK
YBR075W	YBR075W		1.08877	0.008	1.0742	0.045	0.02297	0.008	2e-05	status=JK
YBR076W	ECM8		0.83438	0.09	0.77271	0.118	0.03943	0.09	0.00034
YBR077C	SLM4		1.19147	0.006	1.22855	0.005	-0.0362	0.006	1e-05	status=JK
YBR078W	ECM33		1.12099	0.048	1.12456	0.023	-0.00325	0.048	2e-05
YBR082C	UBC4		1.01584	0.017	1.0059	0.018	0.01065	0.017	0
YBR082C	UBC4		0.95478	0.152	0.93473	0.006	0.01942	0.152	0.00109
YBR083W	TEC1		1.14898	0.022	1.22588	0.039	-0.09527	0.022	0.00013	status=JK
YBR084C-A	RPL19A		0.65149	0.145	0.6575	0.202	-0.05626	0.144	0.00288
YBR084W	MIS1		0.97339	0.092	1.04532	0.05	-0.06113	0.092	0.00023
YBR085W	AAC3		0.97406	0.043	0.92871	0.063	0.06365	0.043	2e-05
YBR086C	IST2		1.02373	0.071	1.03836	0.063	-0.02694	0.071	9e-05
YBR090C	YBR090C		0.91071	0.004	0.94899	0.02	-0.04897	0.004	1e-05	status=JK
YBR090C-A	YBR090C-A		1.00979	0.033	1.02381	0.023	-0.01405	0.033	1e-05
YBR092C	PHO3		0.94449	0.05	0.93282	0.022	0.01536	0.05	4e-05
YBR093C	PHO5		0.58999	0.049	0.57878	0.062	-0.00493	0.049	0.00016
YBR094W	PBY1		1.05332	0.015	1.01708	0.021	0.0397	0.015	7e-05	status=JK
YBR095C	RXT2		0.88731	0.074	0.90817	0.029	-0.03054	0.073	0.00016
YBR095C	RXT2		0.75161	0.031	0.84136	0.076	-0.10205	0.031	2e-05
YBR098W	MMS4		1.10676	0.073	1.07146	0.099	0.04526	0.073	8e-05
YBR099C	YBR099C		0.945	0.046	0.93009	0.03	0.00248	0.046	3e-05
YBR100W	YBR100W		0.94632	0.11	1.01118	0.127	-0.05634	0.11	0.00042
YBR101C	FES1		0.99796	0.053	1.04287	0.043	-0.05187	0.053	4e-05
YBR103W	SIF2		0.78098	0.06	0.77814	0.065	-0.01307	0.06	0.00012
YBR104W	YMC2		0.87049	0.03	0.85044	0.103	-0.00141	0.03	1e-05
YBR105C	VID24		0.99707	0.093	1.05002	0.015	-0.05931	0.093	0.00022
YBR106W	PHO88		0.00431	0.007	0.04575	0.048	-0.03168	0.007	0.42265	status=JK
YBR107C	IML3		0.9974	0.014	0.96971	0.004	0.02789	0.014	6e-05	status=JK
YBR108W	AIM3		1.01309	0.046	1.04777	0.041	-0.01554	0.046	3e-05
YBR111C	YSA1		1.07498	0.054	1.13447	0.071	-0.07581	0.054	3e-05
YBR113W	YBR113W		0.99416	0.061	0.97666	0.057	0.00449	0.061	6e-05
YBR114W	RAD16		1.04491	0.034	1.13562	0.037	-0.07895	0.034	0.00036	status=JK
YBR115C	LYS2		0.66547	0.009	0.68867	0.055	-0.04432	0.009	6e-05	status=JK
YBR115C	LYS2		0.40228	0.011	0.3753	0.054	0.02224	0.011	0.00023	status=JK
YBR116C	YBR116C		0.94968	0.098	0.93269	0.183	0.01018	0.098	0.0003
YBR118W	TEF2		0.9256	0.002	0.92952	0.026	-0.00885	0.002	0	status=JK
YBR119W	MUD1		0.99935	0.069	0.89801	0.098	0.11219	0.069	9e-05
YBR121C	GRS1		0.93427	0.004	0.88477	0.088	0.03904	0.004	1e-05	status=JK
YBR122C	MRPL36		1.03177	0.081	0.97786	0.15	0.057	0.081	0.00013
YBR125C	PTC4		0.97715	0.004	1.0126	0.018	-0.03068	0.004	1e-05	status=JK
YBR126C	TPS1		0.74166	0.04	0.81617	0.013	-0.07877	0.04	4e-05
YBR128C	ATG14		0.96433	0.038	1.02411	0.017	-0.06192	0.038	2e-05
YBR129C	OPY1		0.94052	0.049	0.98172	0.05	-0.04915	0.049	4e-05
YBR130C	SHE3		1.1083	0.047	1.0881	0.08	-0.00292	0.047	2e-05
YBR131W	CCZ1		0.79552	0.007	0.79354	0.056	-0.00956	0.007	3e-05	status=JK
YBR132C	AGP2		1.06316	0.067	1.09658	0.046	-0.02461	0.067	7e-05
YBR134W	YBR134W		1.12264	0.055	1.09896	0.018	0.02276	0.055	3e-05
YBR137W	YBR137W		0.88506	0.034	0.90537	0.072	-0.00598	0.034	2e-05
YBR138C	YBR138C		1.09433	0.086	1.11551	0.06	-0.00255	0.086	0.00013
YBR139W	YBR139W		1.01574	0.024	1.01754	0.081	-0.01686	0.024	0.00019	status=JK
YBR141C	YBR141C		0.9943	0.066	1.06925	0.03	-0.07933	0.066	8e-05
YBR144C	YBR144C		1.06462	0.043	0.95335	0.102	0.09605	0.042	2e-05
YBR145W	ADH5		0.86537	0.013	0.85877	0.03	-0.00993	0.013	8e-05	status=JK
YBR146W	MRPS9		0.99414	0.011	1.01947	0.015	-0.02386	0.011	0
YBR147W	RTC2		0.88852	0.018	0.91241	0.03	-0.03153	0.018	0
YBR148W	YSW1		1.15899	0.056	1.15906	0.042	0.00284	0.055	3e-05
YBR149W	ARA1		0.98024	0.044	0.94629	0.056	0.02207	0.044	2e-05
YBR150C	TBS1		0.98235	0.033	0.94516	0.004	0.03786	0.033	1e-05
YBR151W	APD1		0.96723	0.037	0.94329	0.007	0.02048	0.036	1e-05
YBR156C	SLI15		1.03834	0.045	0.96939	0.06	0.08545	0.045	2e-05
YBR157C	ICS2		0.9694	0.015	0.94527	0.178	-0.01705	0.015	8e-05	status=JK
YBR158W	AMN1		1.03794	0.049	0.97075	0.089	0.07682	0.049	0.00073	status=JK
YBR159W	IFA38		1.17682	0.019	1.22556	0.055	-0.03491	0.019	9e-05	status=JK
YBR161W	CSH1		1.06368	0.01	0.97958	0.075	0.08777	0.01	0
YBR162C	TOS1		1.01527	0.019	1.07946	0.024	-0.07538	0.019	0
YBR162W-A	YSY6		0.97443	0.062	1.02115	0.048	-0.04541	0.062	7e-05
YBR164C	ARL1		0.90956	0.046	0.88242	0.043	0.03179	0.046	3e-05
YBR165W	UBS1		0.98456	0.017	1.01075	0.021	-0.0249	0.017	0
YBR165W	UBS1		1.02688	0.047	1.05808	0.066	-0.05231	0.047	3e-05
YBR166C	TYR1		0.96137	0.013	0.95087	0.11	-0.00536	0.013	6e-05	status=JK
YBR168W	PEX32		0.88054	0.13	0.95178	0.104	-0.07838	0.13	0.00087
YBR169C	SSE2		0.94252	0.045	0.95306	0.046	-0.01585	0.045	3e-05
YBR170C	NPL4		0.65121	0.201	0.66261	0.026	-0.00422	0.2	0.00744
YBR171W	SEC66		1.01533	0.034	0.96964	0.064	0.03454	0.034	1e-05
YBR172C	SMY2		0.95771	0.024	0.94952	0.03	-0.00064	0.024	0.00022	status=JK
YBR174C	YBR174C		0.95155	0.052	1.01346	0.048	-0.05696	0.051	4e-05
YBR175W	SWD3		0.91613	0.047	0.93559	0.031	-0.02175	0.047	4e-05
YBR176W	ECM31		0.98769	0.071	0.98554	0.009	-0.00327	0.071	0.00174	status=JK
YBR177C	EHT1		0.96081	0.101	0.96633	0.137	-0.03335	0.101	0.00032
YBR178W	YBR178W		1.13651	0.031	1.11907	0.016	0.0092	0.031	0.00025	status=JK
YBR180W	DTR1		0.90765	0.029	0.9128	0.065	-0.00282	0.029	0.00035	status=JK
YBR181C	RPS6B		0.59017	0.106	0.67935	0.112	-0.1158	0.106	0.00156
YBR182C	SMP1		1.04721	0.046	1.0394	0.057	0.01544	0.046	0.00065	status=JK
YBR183W	YPC1		1.09886	0.035	0.98359	0.042	0.12092	0.035	0.00033	status=JK
YBR184W	YBR184W		0.96008	0.068	0.99138	0.066	-0.02287	0.068	0.0001
YBR185C	MBA1		0.89006	0.076	0.89995	0.059	-0.02271	0.076	0.00017
YBR186W	PCH2		0.99647	0.01	0.98207	0.007	0.01087	0.01	4e-05	status=JK
YBR187W	GDT1		0.99987	0.036	0.99373	0.054	0.01174	0.036	1e-05
YBR188C	NTC20		1.05221	0.043	1.12682	0.069	-0.06217	0.043	2e-05
YBR189W	RPS9B		0.29261	0.074	0.36258	0.031	-0.073	0.074	0.00423
YBR194W	AIM4		0.79301	0.044	0.80046	0.05	-0.01991	0.044	5e-05
YBR195C	MSI1		1.00584	0.145	0.91697	0.029	0.07487	0.145	0.00082
YBR197C	YBR197C		1.10183	0.052	1.21721	0.077	-0.10521	0.052	3e-05
YBR199W	KTR4		0.94394	0.122	0.9777	0.017	-0.0333	0.122	0.00059
YBR200W	BEM1		0.56611	0.09	0.49899	0.069	0.05177	0.09	0.00108
YBR201W	DER1		0.97572	0.023	0.95822	0.041	0.01928	0.023	0
YBR203W	COS111		1.13594	0.061	1.16929	0.028	-0.02933	0.061	4e-05
YBR204C	LDH1		1.06599	0.035	1.01863	0.112	0.03167	0.035	0.00036	status=JK
YBR205W	KTR3		1.00157	0.042	1.01277	0.033	-0.00725	0.042	2e-05
YBR206W	YBR206W		0.98839	0.08	0.99282	0.081	-0.01016	0.08	0.00014
YBR207W	FTH1		1.07758	0.023	0.98645	0.042	0.07879	0.022	0
YBR208C	DUR1		1.02606	0.045	1.11376	0.022	-0.08419	0.045	2e-05
YBR209W	YBR209W		1.10549	0.154	1.11376	0.094	0.01993	0.153	0.00073
YBR210W	ERV15		1.0451	0.038	1.06255	0.046	-0.01827	0.038	1e-05
YBR212W	NGR1		1.02416	0.073	0.98718	0.102	0.04479	0.072	0.0001
YBR213W	MET8		1.02928	0.017	0.99355	0.083	0.0293	0.017	9e-05	status=JK
YBR214W	SDS24		1.00326	0.01	0.9981	0.009	0.0091	0.01	3e-05	status=JK
YBR215W	HPC2		1.12642	0.056	1.16621	0.046	-0.04861	0.055	3e-05
YBR216C	YBP1		1.02601	0.071	1.04103	0.018	-0.01007	0.071	9e-05
YBR217W	ATG12		0.91311	0.06	0.96565	0.055	-0.05411	0.06	8e-05
YBR218C	PYC2		1.03742	0.005	1.05699	0.092	-0.03994	0.005	1e-05	status=JK
YBR219C	YBR219C		0.92516	0.152	0.9483	0.103	-0.05576	0.152	0.0012
YBR220C	YBR220C		0.99138	0.08	1.03683	0.02	-0.03592	0.08	0.00014
YBR221C	PDB1		0.88837	0.098	0.86346	0.02	0.03383	0.098	0.00037
YBR222C	PCS60		1.02734	0.081	1.01565	0.111	-0.00823	0.081	0.00013
YBR223C	TDP1		0.91109	0.005	0.98306	0.033	-0.07941	0.005	1e-05	status=JK
YBR224W	YBR224W		0.90173	0.069	0.89645	0.155	0.00012	0.069	0.00012
YBR225W	YBR225W		0.9809	0.008	0.90559	0.006	0.07623	0.008	2e-05	status=JK
YBR226C	YBR226C		0.98924	0.048	1.01349	0.029	-0.02536	0.048	3e-05
YBR227C	MCX1		0.95728	0.013	1.01105	0.036	-0.05552	0.013	6e-05	status=JK
YBR228W	SLX1		1.02606	0.045	1.03769	0.054	0.00449	0.045	2e-05
YBR229C	ROT2		1.01657	0.017	1.06943	0.022	-0.05107	0.017	0
YBR230C	OM14		1.0169	0.065	1.01927	0.005	-0.00438	0.065	7e-05
YBR231C	SWC5		0.28898	0.048	0.3089	0.035	-0.0172	0.047	0.0012
YBR232C	YBR232C		1.03291	0.033	1.05941	0.04	-0.03145	0.033	1e-05
YBR233W	PBP2		0.95042	0.051	0.95019	0.015	-0.00154	0.051	4e-05
YBR235W	VHC1		0.95021	0.044	0.93022	0.075	3e-05	0.044	3e-05
YBR238C	YBR238C		0.68164	0.028	0.63191	0.168	0.04348	0.028	2e-05
YBR239C	ERT1		1.01494	0.021	1.11963	0.047	-0.09919	0.021	0.00014	status=JK
YBR240C	THI2		1.09472	0.018	1.09924	0.033	-0.01411	0.018	9e-05	status=JK
YBR241C	YBR241C		0.99026	0.04	0.98649	0.019	-0.00847	0.04	2e-05
YBR242W	YBR242W		0.99503	0.048	0.98958	0.092	0.01591	0.048	3e-05
YBR244W	GPX2		1.01061	0.014	1.00971	0.021	0.00588	0.014	0
YBR245C	ISW1		0.92266	0.046	0.95818	0.008	-0.03273	0.046	3e-05
YBR246W	RRT2		1.04202	0.042	1.07248	0.034	-0.03803	0.042	2e-05
YBR248C	HIS7		0.50654	0.015	0.50252	0.1	0.00616	0.015	0.00028	status=JK
YBR249C	ARO4		1.00668	0.032	0.91994	0.058	0.07543	0.032	1e-05
YBR250W	SPO23		0.97663	0.049	1.01503	0.045	-0.03951	0.049	3e-05
YBR255W	MTC4		1.02282	0.064	1.00097	0.154	0.04537	0.064	7e-05
YBR258C	SHG1		1.06868	0.037	1.10397	0.074	-0.0532	0.037	1e-05
YBR259W	YBR259W		1.02508	0.023	0.98019	0.052	0.04087	0.023	0.00017	status=JK
YBR260C	RGD1		1.00286	0.064	1.12817	0.014	-0.1307	0.064	7e-05
YBR261C	TAE1		0.97604	0.039	1.03896	0.041	-0.06271	0.039	0.00053	status=JK
YBR262C	AIM5		0.89869	0.101	0.92948	0.02	-0.03341	0.101	0.00039
YBR263W	SHM1		1.0591	0.025	0.95483	0.077	0.08424	0.025	0.00018	status=JK
YBR264C	YPT10		0.95174	0.179	0.94057	0.089	0.01599	0.179	0.00179
YBR266C	YBR266C		0.53317	0.111	0.54649	0.144	-0.04828	0.111	0.00241
YBR267W	REI1		0.4525	0.072	0.38676	0.043	0.07569	0.072	0.00107
YBR269C	FMP21		0.97229	0.008	1.0169	0.086	-0.05861	0.008	2e-05	status=JK
YBR270C	BIT2		1.00827	0.128	0.96965	0.264	-0.00376	0.128	0.00056
YBR271W	EFM2		0.9323	0.03	0.89888	0.129	0.06419	0.03	1e-05
YBR272C	HSM3		0.98699	0.065	0.95693	0.12	1e-05	0.065	8e-05
YBR273C	UBX7		1.01576	0.02	1.02127	0.059	-0.00177	0.02	0
YBR274W	CHK1		0.95177	0.04	1.01663	0.067	-0.04546	0.04	2e-05
YBR275C	RIF1		0.90231	0.023	0.79208	0.038	0.10926	0.023	0
YBR276C	PPS1		1.0181	0.065	0.97323	0.161	0.06944	0.064	0.00134	status=JK
YBR277C	YBR277C		1.01299	0.165	1.06496	0.003	-0.05485	0.165	0.00116
YBR278W	DPB3		1.07456	0.018	1.02166	0.037	0.04606	0.017	9e-05	status=JK
YBR280C	SAF1		1.0228	0.002	0.98009	0.095	0.03329	0.002	0	status=JK
YBR281C	DUG2		1.03365	0.024	1.04865	0.088	-0.02311	0.024	0
YBR283C	SSH1		0.8758	0.037	0.70265	0.167	0.1705	0.037	2e-05
YBR284W	YBR284W		0.97854	0.068	0.95106	0.149	0.0047	0.068	9e-05
YBR285W	YBR285W		1.06723	0.038	1.06712	0.017	-0.00445	0.038	1e-05
YBR286W	APE3		1.02392	0.063	0.99563	0.038	0.02144	0.063	6e-05
YBR287W	YBR287W		0.87484	0.028	0.84062	0.139	0.00629	0.028	1e-05
YBR288C	APM3		0.94741	0.024	0.96918	0.037	-0.01791	0.024	0.00021	status=JK
YBR289W	SNF5		0.45908	0.081	0.4678	0.046	-0.00297	0.081	0.0015
YBR290W	BSD2		0.98121	0.033	0.99165	0.09	-0.01102	0.033	1e-05
YBR291C	CTP1		0.90799	0.088	0.80923	0.045	0.08241	0.088	0.00025
YBR292C	YBR292C		0.96919	0.109	1.0019	0.031	-0.03303	0.109	0.00039
YBR293W	VBA2		0.92768	0.037	0.89594	0.067	0.0447	0.037	0.00054	status=JK
YBR294W	SUL1		0	0	0	0	0	0	#NUM!	status=JK
YBR295W	PCA1		0.97645	0.006	0.94946	0.011	0.03123	0.006	1e-05	status=JK
YBR296C	PHO89		0.9929	0.008	1.04321	0.011	-0.05122	0.008	0
YBR297W	MAL33		1.01328	0.039	0.97957	0.057	0.01638	0.039	2e-05
YBR298C	MAL31		0.95246	0.054	0.94774	0.04	0.00523	0.054	5e-05
YBR299W	MAL32		1.08555	0.019	1.10383	0.066	0.00057	0.019	0
YBR300C	YBR300C		1.02242	0.048	1.08078	0.011	-0.06285	0.048	3e-05
YBR301W	PAU24		0.94949	0.073	0.98799	0.093	-0.05087	0.073	0.00012
YCL001W	RER1		1.03285	0.046	1.06599	0.114	-0.04498	0.046	2e-05
YCL001W-A	YCL001W-A		1.09341	0.117	1.09243	0.14	0.01784	0.117	0.00034
YCL002C	YCL002C		0.98036	0.103	0.93432	0.143	0.04695	0.103	0.00032
YCL006C	YCL006C		1.01185	0.036	0.97396	0.138	0.00575	0.035	1e-05
YCL009C	ILV6		1.04311	0.117	1.06854	0.142	-0.05133	0.116	0.00038
YCL010C	SGF29		0.91829	0.062	0.86723	0.04	0.05005	0.062	9e-05
YCL011C	GBP2		1.01828	0.065	1.01784	0.093	0.01902	0.065	7e-05
YCL012W	YCL012W		0.99113	0.055	1.05081	0.06	-0.04835	0.055	5e-05
YCL013W	YCL013W		0.94731	0.06	0.6661	0.025	0.27714	0.06	0.00132	status=JK
YCL014W	BUD3		1.06536	0.065	0.93796	0.172	0.12304	0.065	0.00122	status=JK
YCL016C	DCC1		0.96118	0.024	1.00056	0.009	-0.0374	0.024	0.00021	status=JK
YCL022C	YCL022C		0.96246	0.057	0.98188	0.051	0.00652	0.057	0.00116	status=JK
YCL023C	YCL023C		0.99514	0.09	0.92212	0.181	0.04877	0.09	0.0002
YCL024W	KCC4		0.92531	0.189	0.94404	0.156	0.00534	0.189	0.00227
YCL025C	AGP1		0.84722	0.063	0.84758	0.031	-0.00471	0.063	0.00011
YCL026C	YCL026C		1.1485	0.073	1.21788	0.049	-0.09745	0.073	7e-05
YCL026C-A	FRM2		0.96171	0.033	1.01147	0.052	-0.06421	0.033	1e-05
YCL027W	FUS1		1.06418	0.04	1.10103	0.034	-0.0547	0.04	1e-05
YCL028W	RNQ1		1.07996	0.045	1.06232	0.071	0.0064	0.045	2e-05
YCL029C	BIK1		1.02552	0.043	0.97479	0.061	0.03765	0.043	2e-05
YCL030C	HIS4		0.62167	0.004	0.65958	0.032	-0.04262	0.004	2e-05	status=JK
YCL032W	STE50		0.88451	0.095	0.8298	0.024	0.05862	0.095	0.00034
YCL033C	MXR2		0.93634	0.089	1.02036	0.018	-0.09568	0.089	0.00023
YCL034W	LSB5		1.06238	0.023	1.05498	0.043	0.01332	0.023	0.00015	status=JK
YCL035C	GRX1		1.02922	0.004	1.06157	0.069	-0.04879	0.004	0	status=JK
YCL036W	GFD2		1.08652	0.033	1.08714	0.029	-0.00452	0.033	1e-05
YCL037C	SRO9		0.70407	0.196	0.78093	0.21	-0.05915	0.195	0.00554
YCL038C	ATG22		0.96419	0.014	1.00132	0.111	-0.04028	0.014	7e-05	status=JK
YCL039W	GID7		1.07341	0.038	1.11121	0.031	-0.03842	0.038	1e-05
YCL040W	GLK1		1.03833	0.032	1.12666	0.006	-0.08865	0.032	1e-05
YCL042W	YCL042W		1.05001	0.003	1.07818	0.025	-0.03178	0.003	0	status=JK
YCL044C	MGR1		0.83542	0.077	0.83752	0.073	0.0136	0.077	0.00022
YCL045C	EMC1		1.07325	0.08	1.08782	0.023	-0.01107	0.08	0.00011
YCL046W	YCL046W		1.04572	0.088	1.02992	0.092	-0.01033	0.087	0.00016
YCL047C	POF1		1.0081	0.093	0.98928	0.093	0.02548	0.093	0.00022
YCL048W	SPS22		1.0028	0.029	0.98869	0.023	0.01066	0.029	1e-05
YCL049C	YCL049C		0.95278	0.066	0.92459	0.055	0.01153	0.065	9e-05
YCL050C	APA1		1.07483	0.046	1.05843	0.023	0.00121	0.045	2e-05
YCL051W	LRE1		1.11754	0.037	1.10311	0.133	0.0339	0.037	1e-05
YCL055W	KAR4		0.81622	0.066	0.92879	0.031	-0.1187	0.066	0.00014
YCL056C	PEX34		1.08214	0.063	1.06765	0.083	0.03371	0.063	5e-05
YCL057W	PRD1		1.02036	0.05	1.02808	0.06	-0.02057	0.05	3e-05
YCL060C	YCL060C		1.01419	0.032	0.98399	0.056	0.00611	0.032	0.00034	status=JK
YCL061C	MRC1		0.94001	0.088	0.9982	0.096	-0.04885	0.088	0.00022
YCL062W	YCL062W		0.8358	0.126	0.82639	0.099	-0.01139	0.126	0.00094
YCL063W	VAC17		1.01079	0.058	1.04639	0.035	-0.03995	0.058	5e-05
YCL064C	CHA1		1.05518	0.037	1.09657	0.012	-0.03957	0.037	1e-05
YCL069W	VBA3		0.87803	0.078	0.85827	0.198	0.02046	0.078	0.00019
YCL074W	YCL074W		0.84348	0.021	0.78414	0.086	0.04277	0.021	0.00021	status=JK
YCL075W	YCL075W		0.99375	0.01	1.02628	0.047	-0.05431	0.01	3e-05	status=JK
YCL076W	YCL076W		0.94086	0.046	0.90834	0.082	0.03529	0.046	3e-05
YCR001W	YCR001W		1.18826	0.006	1.12072	0.024	0.06845	0.006	1e-05	status=JK
YCR005C	CIT2		0.93211	0.043	0.97216	0.03	-0.0339	0.042	3e-05
YCR006C	YCR006C		1.07846	0.03	1.0628	0.029	0.01065	0.03	1e-05
YCR007C	YCR007C		1.14824	0.031	1.13771	0.072	0.01783	0.031	1e-05
YCR008W	SAT4		1.03181	0.036	1.05134	0.05	-0.01111	0.036	1e-05
YCR009C	RVS161		0.6863	0.092	0.75058	0.043	-0.05216	0.092	0.00066
YCR010C	ADY2		1.06753	0.069	1.07352	0.035	-0.01179	0.069	7e-05
YCR011C	ADP1		1.09545	0.068	1.18501	0.025	-0.08624	0.068	7e-05
YCR014C	POL4		1.09005	0.088	1.14598	0.076	-0.06793	0.088	0.00014
YCR015C	YCR015C		1.05478	0.05	1.03734	0.033	-0.00216	0.05	3e-05
YCR016W	YCR016W		0.98343	0.068	0.96499	0.008	0.01548	0.068	9e-05
YCR017C	CWH43		1.09078	0.099	1.08921	0.045	0.0014	0.099	0.0002
YCR019W	MAK32		1.01246	0.029	1.05015	0.051	-0.02844	0.029	1e-05
YCR020C	PET18		1.02208	0.029	0.98556	0.008	0.03535	0.029	0.00026	status=JK
YCR020C-A	MAK31		1.02363	0.007	1.04621	0.084	-0.01798	0.007	0
YCR021C	HSP30		1.09054	0.014	1.16345	0.058	-0.07361	0.014	6e-05	status=JK
YCR022C	YCR022C		1.13789	0.011	1.06641	0.123	0.05495	0.011	0
YCR023C	YCR023C		1.04272	0.111	1.08858	0.12	-0.0419	0.111	0.00033
YCR024C-A	PMP1		1.04609	0.077	1.01636	0.092	0.01827	0.077	0.00011
YCR025C	YCR025C		1.10906	0.051	1.11106	0.065	-0.00796	0.05	3e-05
YCR026C	NPP1		1.09487	0.013	1.15181	0.029	-0.06031	0.013	4e-05	status=JK
YCR027C	RHB1		1.08558	0.047	1.06369	0.093	0.01986	0.047	2e-05
YCR028C-A	RIM1		0.6046	0.012	0.68581	0.045	-0.0825	0.012	0.00013	status=JK
YCR030C	SYP1		1.06206	0.03	1.03334	0.055	0.01278	0.029	1e-05
YCR031C	RPS14A		0.85581	0.023	0.71607	0.046	0.11297	0.023	1e-05
YCR032W	BPH1		0.92153	0.132	0.9103	0.159	-0.02691	0.132	0.00079
YCR033W	SNT1		0.46602	0.029	0.48648	0.126	-0.04455	0.029	0.00128	status=JK
YCR034W	FEN1		0.89437	0.066	0.88214	0.021	0.02032	0.066	0.00011
YCR036W	RBK1		1.09819	0.047	1.04092	0.11	0.05296	0.046	2e-05
YCR037C	PHO87		1.06643	0.06	1.03826	0.059	0.02564	0.06	0.00104	status=JK
YCR043C	YCR043C		1.13273	0.075	1.16778	0.046	-0.04055	0.075	8e-05
YCR044C	PER1		1.10346	0.04	1.04628	0.08	0.06071	0.04	1e-05
YCR045C	RRT12		1.14074	0.068	1.15086	0.047	-0.01123	0.068	6e-05
YCR048W	ARE1		1.12515	0.026	1.07106	0.042	0.02901	0.026	0.00018	status=JK
YCR049C	YCR049C		0.99197	0.082	0.93369	0.173	0.02444	0.082	0.00016
YCR050C	YCR050C		0.94173	0.208	1.08894	0.038	-0.15722	0.208	0.00285
YCR051W	YCR051W		0.99486	0.089	1.15478	0.074	-0.15095	0.089	0.0002
YCR053W	THR4		0.36585	0.012	0.35711	0.112	0.00188	0.012	0.00037	status=JK
YCR059C	YIH1		0.97588	0.166	1.0217	0.133	-0.05042	0.165	0.00131
YCR060W	TAH1		0.81111	0.053	1.0738	0.058	-0.25572	0.053	0.00145	status=JK
YCR061W	YCR061W		1.07407	0.084	1.033	0.028	0.02418	0.084	0.00013
YCR062W	YCR062W		1.04177	0.115	1.03784	0.161	0.00798	0.114	0.00036
YCR063W	BUD31		0.47229	0.069	0.47892	0.099	0.00227	0.069	0.00084
YCR065W	HCM1		0.97912	0.008	1.09148	0.028	-0.12762	0.008	2e-05	status=JK
YCR067C	SED4		1.09142	0.072	1.09972	0.053	-0.0033	0.071	8e-05
YCR068W	ATG15		1.12726	0.006	1.15617	0.067	-0.0295	0.005	1e-05	status=JK
YCR069W	CPR4		1.16199	0.069	1.19312	0.024	-0.04346	0.069	6e-05
YCR071C	IMG2		0.66453	0.067	0.76976	0.032	-0.11375	0.067	0.00028
YCR073C	SSK22		1.03478	0.019	1.04616	0.09	-0.03382	0.019	0
YCR073W-A	SOL2		1.02494	0.043	1.0105	0.078	0.00024	0.043	2e-05
YCR075C	ERS1		1.11182	0.007	1.10203	0.023	0.0081	0.007	2e-05	status=JK
YCR076C	FUB1		1.22254	0.046	1.21388	0.053	-0.00334	0.046	1e-05
YCR077C	PAT1		0.7327	0.014	0.77904	0.101	-0.05939	0.014	0.00013	status=JK
YCR079W	PTC6		0.98197	0.035	0.9935	0.105	0.00646	0.035	1e-05
YCR081W	SRB8		0.73102	0.017	0.65073	0.014	0.08113	0.017	0.00018	status=JK
YCR082W	AHC2		1.0637	0.074	1.00766	0.02	0.04883	0.074	9e-05
YCR083W	TRX3		1.14537	0.03	1.08951	0.018	0.0514	0.03	0.00023	status=JK
YCR085W	YCR085W		1.09347	0.075	1.11385	0.009	-0.02041	0.075	9e-05
YCR086W	CSM1		0.97711	0.104	1.06307	0.02	-0.09163	0.104	0.00033
YCR087C-A	YCR087C-A		1.15006	0.05	1.06982	0.007	0.07521	0.05	2e-05
YCR087W	YCR087W		1.10936	0.141	1.04659	0.073	0.05307	0.141	0.00056
YCR088W	ABP1		0.98309	0.011	0.97856	0.033	0.00098	0.011	0
YCR089W	FIG2		1.08234	0.026	1.09455	0.023	-0.01827	0.026	0
YCR090C	YCR090C		1.04653	0.085	0.97745	0.159	0.06623	0.084	0.00014
YCR091W	KIN82		0.92006	0.09	1.00398	0.052	-0.08929	0.09	0.00026
YCR092C	MSH3		1.04027	0.039	1.0201	0.017	0.01206	0.039	1e-05
YCR095C	OCA4		1.08809	0.02	1.05992	0.118	0.03635	0.02	0
YCR098C	GIT1		1.09547	0.042	1.08338	0.015	0.00281	0.042	2e-05
YCR099C	YCR099C		1.05898	0.062	1.04591	0.058	-9e-05	0.062	6e-05
YCR100C	YCR100C		1.11132	0.087	1.18922	0.049	-0.06362	0.086	0.00013
YCR101C	YCR101C		0.96676	0.127	0.98505	0.124	-0.05295	0.126	0.00061
YCR102C	YCR102C		1.09453	0.082	1.02973	0.086	0.07497	0.082	0.00012
YCR102W-A	YCR102W-A		1.03419	0.067	1.0619	0.045	-0.03657	0.067	8e-05
YCR105W	ADH7		0.84654	0.013	0.77466	0.127	0.05312	0.013	8e-05	status=JK
YCR106W	RDS1		1.11281	0.033	1.1144	0.058	0.00848	0.033	1e-05
YCR107W	AAD3		1.05763	0.05	1.05528	0.008	0.00163	0.05	3e-05
YDL001W	RMD1		0.96999	0.09	0.99912	0.06	-0.04509	0.089	0.00022
YDL002C	NHP10		0.90791	0.062	0.86864	0.059	0.05033	0.062	9e-05
YDL006W	PTC1		0.74899	0.043	0.81856	0.056	-0.06628	0.043	5e-05
YDL010W	GRX6		1.08673	0.032	1.12113	0.002	-0.03687	0.032	1e-05
YDL011C	YDL011C		1.10941	0.049	1.12268	0.053	-0.02774	0.049	2e-05
YDL012C	YDL012C		1.00264	0.016	1.05758	0.087	-0.06031	0.016	9e-05	status=JK
YDL013W	SLX5		0.71018	0.086	0.59475	0.116	0.1388	0.086	0.00049
YDL018C	ERP3		0.99917	0.038	1.11262	0.039	-0.13681	0.038	2e-05
YDL019C	OSH2		1.09702	0.058	1.05752	0.173	0.00168	0.058	4e-05
YDL020C	RPN4		0.71362	0.044	0.81623	0.053	-0.09778	0.044	7e-05
YDL023C	YDL023C		1.09955	0.041	1.13111	0.062	-0.04714	0.041	1e-05
YDL024C	DIA3		0.96226	0.096	1.02129	0.085	-0.06444	0.096	0.00027
YDL025C	RTK1		1.13289	0.071	1.14506	0.037	-0.01082	0.071	7e-05
YDL026W	YDL026W		1.02415	0.049	0.98415	0.08	0.03811	0.049	3e-05
YDL027C	YDL027C		0.98296	0.037	0.87914	0.163	0.07775	0.037	2e-05
YDL033C	SLM3		0.66275	0.015	0.65823	0.129	0.00355	0.015	0.00018	status=JK
YDL034W	YDL034W		1.02234	0.062	0.9682	0.039	0.06113	0.062	0.00123	status=JK
YDL035C	GPR1		0.99818	0.045	0.97616	0.044	0.01276	0.045	3e-05
YDL036C	PUS9		1.11321	0.057	1.20344	0.03	-0.0934	0.057	4e-05
YDL037C	BSC1		1.12746	0.021	1.11925	0.069	0.02492	0.021	0.00011	status=JK
YDL038C	YDL038C		1.02328	0.005	0.99834	0.033	0.03994	0.005	1e-05	status=JK
YDL039C	PRM7		1.07006	0.072	1.08278	0.049	-0.01728	0.072	8e-05
YDL040C	NAT1		1.0379	0.038	1.03976	0.086	0.01893	0.037	1e-05
YDL041W	YDL041W		0	0	0	0	0	0	#NUM!
YDL042C	SIR2		0	0	0	0	0	0	#NUM!
YDL046W	NPC2		0.97764	0.027	0.96434	0.043	-0.00294	0.027	1e-05
YDL048C	STP4		1.09656	0.02	1.03041	0.088	0.04752	0.02	0.00011	status=JK
YDL050C	YDL050C		1.09365	0.052	1.04639	0.098	0.02078	0.052	3e-05
YDL051W	LHP1		1.04694	0.033	1.00533	0.017	0.03977	0.032	1e-05
YDL052C	SLC1		0.98728	0.055	0.98825	0.09	0.00328	0.055	5e-05
YDL053C	PBP4		0.92526	0.036	0.99821	0.002	-0.07522	0.036	0.00049	status=JK
YDL054C	MCH1		0.97061	0.06	1.00319	0.016	-0.03729	0.06	6e-05
YDL056W	MBP1		1.16905	0.039	1.22827	0.075	-0.03984	0.039	1e-05
YDL059C	RAD59		1.04657	0.079	1.11755	0.078	-0.06963	0.079	0.00012
YDL061C	RPS29B		0.67917	0.067	0.70308	0.05	-0.01541	0.067	0.00026
YDL062W	YDL062W		0.87294	0.037	0.90041	0.086	-0.03732	0.037	2e-05
YDL065C	PEX19		0.90941	0.02	0.97592	0.019	-0.06944	0.02	0.00016	status=JK
YDL066W	IDP1		1.1122	0.03	1.0091	0.228	0.06127	0.03	0.00024	status=JK
YDL070W	BDF2		1.06862	0.102	1.05779	0.052	-0.01483	0.102	0.00024
YDL071C	YDL071C		1.04475	0.134	0.97331	0.125	0.08219	0.133	0.00057
YDL074C	BRE1		0.66542	0.054	0.72952	0.009	-0.06498	0.054	0.00015
YDL074C	BRE1		0.58687	0.109	0.72459	0.124	-0.1202	0.109	0.00171
YDL076C	RXT3		0.97973	0.031	0.89933	0.108	0.07504	0.03	1e-05
YDL077C	VAM6		0.74954	0.011	0.71111	0.093	0.03393	0.011	8e-05	status=JK
YDL078C	MDH3		0.76944	0.128	0.56645	0.026	0.20623	0.128	0.00125
YDL079C	MRK1		0.97901	0.045	0.98933	0.135	-0.03892	0.045	3e-05
YDL080C	THI3		0.79124	0.004	0.87578	0.033	-0.08991	0.004	1e-05	status=JK
YDL081C	RPP1A		0.66293	0.077	0.74814	0.028	-0.07181	0.076	0.00042
YDL082W	RPL13A		0.73701	0.013	0.82003	0.06	-0.08	0.012	0.0001	status=JK
YDL083C	RPS16B		0.72895	0.016	0.7132	0.05	0.00327	0.016	0
YDL085W	NDE2		1.15824	0.015	1.09859	0.078	0.04933	0.015	6e-05	status=JK
YDL086W	YDL086W		1.17485	0.026	1.1443	0.063	0.01573	0.026	0.00017	status=JK
YDL088C	ASM4		0.98731	0.014	1.02159	0.037	-0.03083	0.014	0
YDL089W	NUR1		1.04249	0.018	1.0432	0.006	0.00045	0.018	9e-05	status=JK
YDL090C	RAM1		0	0	0	0	0	0	#NUM!
YDL091C	UBX3		1.03144	0.083	1.08826	0.009	-0.06335	0.082	0.00014
YDL093W	PMT5		1.14283	0.063	1.21096	0.029	-0.08096	0.063	5e-05
YDL094C	YDL094C		1.03334	0.1	1.04931	0.061	-0.01997	0.1	0.00025
YDL095W	PMT1		0.9784	0.034	0.97987	0.022	0.00176	0.034	1e-05
YDL096C	YDL096C		0.93963	0.033	0.97379	0.022	-0.03352	0.033	1e-05
YDL099W	BUG1		1.04614	0.035	1.12618	0.003	-0.0811	0.035	1e-05
YDL100C	GET3		0.98716	0.016	0.91787	0.054	0.05408	0.016	9e-05	status=JK
YDL104C	QRI7		0.81104	0.043	0.8302	0.14	-0.06265	0.043	4e-05
YDL106C	PHO2		0.90595	0.065	0.9439	0.052	-0.04403	0.065	0.0001
YDL109C	YDL109C		0.99259	0.002	0.90919	0.068	0.08053	0.002	0	status=JK
YDL110C	TMA17		0.9573	0.03	0.90766	0.064	0.03396	0.03	1e-05
YDL112W	TRM3		0.86754	0.126	0.90854	0.044	-0.06382	0.126	0.00083
YDL113C	ATG20		0.91595	0.106	0.98144	0.029	-0.08321	0.106	0.00042
YDL114W	YDL114W		1.06002	0.048	1.03975	0.083	0.02528	0.048	3e-05
YDL117W	CYK3		0.77731	0.043	0.81028	0.026	-0.03359	0.043	5e-05
YDL118W	YDL118W		0.88262	0.028	0.90631	0.047	-0.03786	0.027	1e-05
YDL119C	YDL119C		0.95019	0.036	0.98962	0.027	-0.04291	0.036	1e-05
YDL121C	YDL121C		0.99582	0.064	0.93722	0.046	0.05826	0.064	7e-05
YDL122W	UBP1		1.02389	0.054	0.95787	0.112	0.04349	0.054	4e-05
YDL123W	SNA4		1.0007	0.099	1.04157	0.058	-0.0289	0.099	0.00026
YDL124W	YDL124W		1.05855	0.076	1.09756	0.075	-0.03767	0.075	0.0001
YDL125C	HNT1		0.97111	0.047	1.02377	0.026	-0.04942	0.047	3e-05
YDL127W	PCL2		0.93267	0.074	0.83742	0.065	0.07581	0.074	0.00014
YDL128W	VCX1		0.95761	0.018	1.02727	0.084	-0.0636	0.018	0
YDL129W	YDL129W		1.03414	0.024	1.03826	0.014	-0.01158	0.024	0
YDL130W	RPP1B		0.90177	0.021	0.96237	0.034	-0.05958	0.021	0
YDL130W-A	STF1		1.16486	0.02	1.12532	0.006	0.03822	0.02	0.0001	status=JK
YDL131W	LYS21		0.9793	0.187	1.0652	0.044	-0.09942	0.187	0.00187
YDL133C-A	RPL41B		1.01944	0.084	1.16661	0.044	-0.14119	0.084	0.00015
YDL133W	SRF1		0.98781	0.032	0.9979	0.03	-0.01883	0.032	1e-05
YDL134C	PPH21		1.01863	0.056	1.03775	0.173	-0.03447	0.055	4e-05
YDL134C-A	YDL134C-A		0.9993	0.015	0.96642	0.102	0.0255	0.015	7e-05	status=JK
YDL135C	RDI1		1.0721	0.037	0.99553	0.041	0.07668	0.037	0.0004	status=JK
YDL136W	RPL35B		0.89185	0.053	0.73197	0.218	0.20046	0.053	6e-05
YDL137W	ARF2		0.97921	0.056	0.91543	0.138	0.04099	0.056	5e-05
YDL138W	RGT2		1.10758	0.068	1.08113	0.045	0.02887	0.068	6e-05
YDL142C	CRD1		0.84688	0.025	0.87518	0.033	-0.02019	0.025	1e-05
YDL144C	YDL144C		1.03416	0.022	1.03081	0.062	0.00126	0.022	0
YDL146W	LDB17		0.98452	0.028	1.03393	0.028	-0.05035	0.028	0.00028	status=JK
YDL149W	ATG9		0.91745	0.132	0.95647	0.02	-0.05011	0.132	0.00081
YDL154W	MSH5		0.99935	0.022	1.11443	0.066	-0.14443	0.022	0.00017	status=JK
YDL155W	CLB3		1.00419	0.093	1.08621	0.055	-0.0834	0.093	0.00022
YDL156W	CMR1		0.93072	0.064	0.91699	0.058	0.02507	0.064	9e-05
YDL157C	YDL157C		0.79959	0.038	0.84826	0.028	-0.04992	0.038	3e-05
YDL159W	STE7		0	0	0	0	0	0	#NUM!
YDL160C	DHH1		0	0	0	0	0	0	#NUM!
YDL161W	ENT1		0.96854	0.055	0.96462	0.045	0.01342	0.055	5e-05
YDL162C	YDL162C		1.02138	0.066	1.01752	0.07	0.00988	0.066	7e-05
YDL167C	NRP1		0.97188	0.036	0.97505	0.02	0.00091	0.036	1e-05
YDL168W	SFA1		1.03389	0.047	1.08468	0.014	-0.04883	0.047	3e-05
YDL169C	UGX2		0.96648	0.073	0.94171	0.024	0.015	0.073	0.00012
YDL170W	UGA3		1.01914	0.046	1.0349	0.04	-0.02636	0.046	3e-05
YDL171C	GLT1		1.09335	0.063	1.10361	0.141	0.01962	0.063	5e-05
YDL172C	YDL172C		0.91989	0.01	0.85089	0.03	0.06428	0.01	0
YDL173W	PAR32		0.9121	0.031	0.92792	0.051	-0.0379	0.031	0.00038	status=JK
YDL174C	DLD1		1.09943	0.026	1.17364	0.062	-0.09084	0.026	0
YDL175C	AIR2		1.05896	0.007	1.114	0.096	-0.03383	0.007	1e-05	status=JK
YDL176W	YDL176W		0.96335	0.06	1.01083	0.096	-0.05214	0.06	7e-05
YDL177C	YDL177C		1.06571	0.005	1.06446	0.089	0.01265	0.005	1e-05	status=JK
YDL178W	DLD2		1.09507	0.055	1.15234	0.14	-0.05804	0.055	3e-05
YDL179W	PCL9		1.05171	0.012	1.15926	0.061	-0.12468	0.012	4e-05	status=JK
YDL180W	YDL180W		0.82031	0.198	0.99633	0.051	-0.17585	0.198	0.00369
YDL181W	INH1		0.94651	0.017	1.07778	0.085	-0.15356	0.017	0.00011	status=JK
YDL182W	LYS20		0.96492	0.065	0.9004	0.128	0.06449	0.065	8e-05
YDL183C	YDL183C		0.90918	0.061	0.89331	0.088	0.01898	0.061	8e-05
YDL184C	RPL41A		1.05624	0.007	1.07369	0.108	-0.0199	0.007	1e-05	status=JK
YDL185W	VMA1		0.91032	0.015	1.00855	0.094	-0.08109	0.015	9e-05	status=JK
YDL186W	YDL186W		1.02431	0.059	1.00151	0.108	-0.00274	0.059	5e-05
YDL187C	YDL187C		0.99101	0.044	1.05217	0.027	-0.05767	0.043	2e-05
YDL188C	PPH22		1.00609	0.027	1.02717	0.017	-0.02544	0.027	0.00024	status=JK
YDL189W	RBS1		1.01771	0.043	1.06392	0.033	-0.03964	0.043	2e-05
YDL190C	UFD2		0.98586	0.032	0.98784	0.029	0.00624	0.032	1e-05
YDL191W	RPL35A		0.77414	0.01	0.84734	0.039	-0.07569	0.01	0
YDL192W	ARF1		0.65137	0.099	0.78877	0.027	-0.12907	0.099	0.00094
YDL194W	SNF3		0.98423	0.026	0.95494	0.028	0.03267	0.026	1e-05
YDL197C	ASF2		1.05965	0.018	1.04204	0.016	0.0191	0.018	0.0001	status=JK
YDL199C	YDL199C		1.04472	0.056	1.02884	0.037	0.00861	0.056	4e-05
YDL200C	MGT1		1.06104	0.056	1.05543	0.027	0.00927	0.056	0.00094	status=JK
YDL201W	TRM8		1.0612	0.037	0.95908	0.011	0.1006	0.037	1e-05
YDL203C	ACK1		1.08522	0.098	1.01705	0.092	0.06674	0.098	0.0002
YDL204W	RTN2		0.97341	0.028	0.95122	0.013	0.02068	0.027	1e-05
YDL206W	YDL206W		1.05209	0.011	1.0248	0.063	0.02837	0.011	0
YDL210W	UGA4		1.06562	0.034	1.06068	0.018	0.00051	0.034	1e-05
YDL211C	YDL211C		1.0857	0.037	1.0553	0.074	0.00796	0.037	1e-05
YDL213C	NOP6		0.99071	0.021	1.01698	0.018	-0.0309	0.021	0
YDL214C	PRR2		1.05666	0.024	1.0638	0.04	0.00336	0.024	0
YDL215C	GDH2		0.93553	0.042	0.90546	0.005	0.03213	0.042	3e-05
YDL216C	RRI1		0.95973	0.023	0.97789	0.005	-0.01971	0.023	0
YDL218W	YDL218W		0.91272	0.029	0.98068	0.1	-0.07362	0.029	0.00034	status=JK
YDL219W	DTD1		1.05634	0.039	1.04442	0.031	0.01578	0.039	1e-05
YDL222C	FMP45		0.98841	0.022	1.01128	0.04	-0.01431	0.022	0
YDL223C	HBT1		1.02936	0.038	1.05257	0.013	-0.01917	0.038	1e-05
YDL224C	WHI4		1.00984	0.015	1.02301	0.039	-0.01207	0.015	8e-05	status=JK
YDL226C	GCS1		0.97645	0.062	0.99197	0.029	-0.01417	0.062	7e-05
YDL227C	HO		0.94755	0.057	0.93019	0.041	0.01687	0.057	6e-05
YDL229W	SSB1		0.82382	0.046	0.80276	0.081	0.03063	0.046	5e-05
YDL230W	PTP1		0.99806	0.018	1.01657	0.034	-0.01756	0.018	0
YDL231C	BRE4		1.00094	0.077	1.01154	0.033	-0.01605	0.076	0.00012
YDL232W	OST4		0.67906	0.041	0.67667	0.03	0.00981	0.041	6e-05
YDL233W	MFG1		1.03619	0.151	1.18746	0.019	-0.1485	0.151	0.00084
YDL234C	GYP7		0.97894	0.07	0.96438	0.131	0.01928	0.07	0.0001
YDL236W	PHO13		0.94127	0.071	0.89112	0.077	0.04043	0.071	0.00012
YDL237W	AIM6		1.09733	0.029	1.11536	0.011	-0.01846	0.029	0
YDL238C	GUD1		1.03791	0.06	1.06306	0.036	-0.02054	0.06	5e-05
YDL239C	ADY3		0.96952	0.052	0.9198	0.021	0.05265	0.052	4e-05
YDL240W	LRG1		0.90677	0.144	0.95267	0.067	-0.0382	0.144	0.00108
YDL241W	YDL241W		1.0168	0.047	1.05617	0.057	-0.05464	0.046	3e-05
YDL242W	YDL242W		1.05871	0.028	1.04085	0.034	0.01108	0.028	1e-05
YDL243C	AAD4		1.05495	0.01	1.05226	0.006	0.00404	0.01	0
YDR001C	NTH1		0.93751	0.027	0.95522	0.028	-0.01782	0.027	1e-05
YDR003W	RCR2		1.05191	0.078	1.01	0.085	0.03502	0.078	0.00011
YDR004W	RAD57		0.93599	0.091	0.85695	0.105	0.09084	0.091	0.00025
YDR005C	MAF1		0.96537	0.025	0.97351	0.024	-0.01528	0.025	1e-05
YDR006C	SOK1		0.88942	0.045	0.90414	0.004	-0.01651	0.045	4e-05
YDR007W	TRP1		1.02938	0.037	1.02527	0.014	0.00027	0.037	1e-05
YDR008C	YDR008C		1.04658	0.095	1.06628	0.018	-0.01063	0.094	0.0002
YDR009W	GAL3		1.01842	0.085	1.03623	0.065	-0.00852	0.085	0.00016
YDR010C	YDR010C		1.0684	0.071	1.06318	0.104	0.0018	0.071	8e-05
YDR011W	SNQ2		1.00043	0.037	0.96419	0.095	0.03839	0.037	1e-05
YDR014W	RAD61		0.98281	0.046	1.0168	0.011	-0.02894	0.046	3e-05
YDR015C	YDR015C		0.98871	0.025	0.98683	0.018	0.01039	0.024	0.00021	status=JK
YDR018C	YDR018C		1.06515	0.028	1.06603	0.076	-0.02061	0.028	1e-05
YDR019C	GCV1		1.02309	0.075	1.01387	0.096	-8e-05	0.075	0.00011
YDR020C	DAS2		1.09364	0.011	1.04401	0.032	0.05289	0.011	3e-05	status=JK
YDR022C	ATG31		1.1126	0.028	1.05503	0.012	0.05088	0.028	0
YDR024W	YDR024W		0.8353	0.04	0.78377	0.06	0.04065	0.04	3e-05
YDR025W	RPS11A		0.84228	0.127	0.85921	0.08	-0.03521	0.127	0.00092
YDR026C	NSI1		1.08395	0.005	1.05589	0.017	0.02765	0.005	1e-05	status=JK
YDR029W	YDR029W		0.96489	0.051	1.03162	0.024	-0.07161	0.051	4e-05
YDR030C	RAD28		1.03248	0.057	1.04234	0.091	-0.00652	0.057	5e-05
YDR031W	MIC14		0.96118	0.12	0.97831	0.094	-0.02886	0.119	0.00052
YDR032C	PST2		0.96897	0.027	0.97893	0.025	-0.00313	0.027	1e-05
YDR033W	MRH1		1.00644	0.052	1.0239	0.024	-0.00373	0.052	4e-05
YDR034C	LYS14		0.55122	0.073	0.56332	0.035	-0.0078	0.073	0.00063
YDR035W	ARO3		1.05962	0.142	0.98324	0.082	0.09597	0.142	0.00065
YDR036C	EHD3		0.93509	0.053	0.88014	0.024	0.05087	0.053	5e-05
YDR042C	YDR042C		1.11115	0.033	1.08035	0.082	0.0115	0.033	0.00029	status=JK
YDR043C	NRG1		1.00507	0.03	0.99372	0.135	-0.00627	0.03	1e-05
YDR046C	BAP3		1.04356	0.009	1.01727	0.098	0.03329	0.009	0
YDR048C	YDR048C		0.83334	0.047	1.03302	0.022	-0.20206	0.047	0.00107	status=JK
YDR049W	VMS1		0.8356	0.108	0.95257	0.042	-0.1272	0.108	0.00058
YDR051C	DET1		0.97188	0.024	0.88579	0.034	0.06904	0.024	0.00021	status=JK
YDR055W	PST1		1.07224	0.016	1.05119	0.095	0.02416	0.016	7e-05	status=JK
YDR056C	YDR056C		1.09678	0.013	0.94941	0.152	0.14774	0.013	5e-05	status=JK
YDR057W	YOS9		1.12271	0.049	1.10222	0.066	0.00871	0.048	2e-05
YDR058C	TGL2		0.92039	0.062	0.91375	0.015	0.0094	0.062	8e-05
YDR059C	UBC5		1.21311	0.03	1.0144	0.255	0.2034	0.03	0
YDR061W	YDR061W		1.04009	0.034	1.04748	0.018	-0.01841	0.034	1e-05
YDR063W	AIM7		0.9457	0.049	1.06677	0.04	-0.12336	0.049	4e-05
YDR066C	RTR2		1.04131	0.127	1.00072	0.208	0.03946	0.127	0.00049
YDR067C	OCA6		1.0222	0.068	1.09523	0.058	-0.07018	0.068	8e-05
YDR068W	DOS2		1.03435	0.236	1.15544	0.096	-0.15933	0.236	0.00314
YDR070C	FMP16		0.98935	0.093	1.07261	0.08	-0.09533	0.093	0.00023
YDR071C	PAA1		0.94909	0.041	0.79807	0.024	0.14386	0.041	2e-05
YDR072C	IPT1		1.06855	0.024	0.98772	0.06	0.06469	0.024	0.00017	status=JK
YDR073W	SNF11		1.12865	0.05	1.09547	0.091	0.02546	0.05	2e-05
YDR074W	TPS2		0.99172	0.032	0.84707	0.183	0.08606	0.032	1e-05
YDR075W	PPH3		1.02168	0.039	1.02984	0.053	-0.00917	0.039	0.00049	status=JK
YDR076W	RAD55		0.80321	0.022	0.83168	0.051	-0.04275	0.022	1e-05
YDR077W	SED1		1.00013	0.031	0.95478	0.072	0.02391	0.031	1e-05
YDR080W	VPS41		0.74473	0.016	0.84543	0.033	-0.10873	0.016	0
YDR083W	RRP8		0.70518	0.01	0.81769	0.009	-0.11563	0.01	0
YDR084C	TVP23		1.01557	0.083	1.07845	0.023	-0.06949	0.083	0.00015
YDR085C	AFR1		1.05103	0.053	1.09788	0.077	-0.02744	0.053	3e-05
YDR089W	YDR089W		1.07627	0.006	1.08178	0.011	-0.00573	0.006	0
YDR090C	YDR090C		1.06748	0.048	1.06902	0.006	-0.00221	0.048	3e-05
YDR092W	UBC13		0.84564	0.064	0.81555	0.095	0.02915	0.064	0.00012
YDR093W	DNF2		1.02323	0.042	1.03361	0.082	-0.02693	0.042	2e-05
YDR094W	YDR094W		0.90324	0.032	1.0044	0.012	-0.10238	0.032	1e-05
YDR095C	YDR095C		1.01729	0.045	0.99714	0.046	0.01377	0.045	2e-05
YDR096W	GIS1		1.00614	0.025	1.01991	0.034	-0.01477	0.025	0
YDR097C	MSH6		0.96654	0.048	0.95622	0.044	0.00453	0.048	3e-05
YDR098C	GRX3		1.02103	0.022	1.07821	0.008	-0.05856	0.022	0.00015	status=JK
YDR099W	BMH2		0.91203	0.025	0.90373	0.067	-0.00399	0.025	0.00025	status=JK
YDR100W	TVP15		1.03464	0.057	1.01582	0.051	0.02832	0.057	5e-05
YDR101C	ARX1		0.80773	0.002	0.82119	0.022	-0.01484	0.002	0	status=JK
YDR102C	YDR102C		0.99582	0.023	1.01673	0.029	-0.0254	0.023	0
YDR103W	STE5		0	0	0.00305	0.004	-0.00202	0	#NUM!
YDR104C	SPO71		1.0008	0.042	1.0055	0.055	-0.00515	0.042	2e-05
YDR105C	TMS1		1.07436	0.02	1.09126	0.075	-0.0365	0.02	0
YDR107C	TMN2		0.99313	0.013	0.99673	0.044	0.00103	0.013	5e-05	status=JK
YDR108W	TRS85		0.96795	0.045	0.93319	0.015	0.02956	0.045	3e-05
YDR109C	YDR109C		1.10826	0.049	1.11333	0.053	-0.0142	0.049	2e-05
YDR110W	FOB1		1.10753	0.111	1.07115	0.061	0.05164	0.111	0.00027
YDR111C	ALT2		0.94681	0.078	0.91886	0.107	-0.01053	0.078	0.00016
YDR112W	YDR112W		1.00449	0.053	1.02514	0.019	-0.01934	0.053	4e-05
YDR116C	MRPL1		0.74001	0.009	0.79583	0.046	-0.06285	0.009	5e-05	status=JK
YDR117C	TMA64		1.02224	0.004	0.97554	0.032	0.04432	0.004	0	status=JK
YDR119W	VBA4		1.03016	0.063	1.06843	0.189	-0.08877	0.062	6e-05
YDR120C	TRM1		0.9964	0.133	0.98116	0.138	-0.00579	0.133	0.00065
YDR121W	DPB4		1.06244	0.037	1.01686	0.063	0.04849	0.037	1e-05
YDR122W	KIN1		1.08527	0.019	1.06168	0.009	0.01998	0.019	0
YDR123C	INO2		0.69774	0.017	0.71672	0.009	-0.02009	0.017	0.0002	status=JK
YDR124W	YDR124W		1.02754	0.034	1.01041	0.095	-0.00839	0.034	1e-05
YDR125C	ECM18		1.05165	0.019	1.01596	0.099	0.03346	0.019	0.00011	status=JK
YDR126W	SWF1		0.81225	0.045	0.7911	0.054	0.01345	0.045	5e-05
YDR127W	ARO1		0.82034	0.051	0.80317	0.005	0.01409	0.051	7e-05
YDR128W	MTC5		0.80559	0.014	0.77034	0.041	0.02654	0.014	0.0001	status=JK
YDR130C	FIN1		0.99349	0.039	1.06932	0.071	-0.07961	0.039	2e-05
YDR131C	YDR131C		1.01889	0.042	1.0124	0.078	0.02437	0.042	2e-05
YDR132C	YDR132C		0.99309	0.06	1.0212	0.016	-0.03122	0.06	6e-05
YDR133C	YDR133C		1.13012	0.021	1.10068	0.041	0.02729	0.02	0
YDR134C	YDR134C		1.04207	0.066	1.00933	0.007	0.03196	0.066	7e-05
YDR135C	YCF1		0.99839	0.056	1.02836	0.051	-0.03827	0.056	5e-05
YDR139C	RUB1		0.89151	0.098	1.0027	0.011	-0.11593	0.098	0.00036
YDR142C	PEX7		0.95139	0.033	0.99135	0.041	-0.0346	0.032	1e-05
YDR143C	SAN1		1.19571	0.03	1.14942	0.023	0.03231	0.03	0
YDR144C	MKC7		0.75697	0.061	0.88896	0.019	-0.1362	0.061	0.00014
YDR146C	SWI5		0.98434	0.071	1.02916	0.056	-0.04001	0.071	0.0001
YDR147W	EKI1		0.9859	0.023	0.92231	0.052	0.04546	0.023	0
YDR148C	KGD2		0.99019	0.061	1.11813	0.007	-0.13063	0.061	6e-05
YDR149C	YDR149C		0.85436	0.021	0.96954	0.031	-0.1185	0.021	0
YDR150W	NUM1		0.8431	0.008	0.93681	0.045	-0.09599	0.008	3e-05	status=JK
YDR151C	CTH1		1.0418	0.047	1.04806	0.004	-0.00743	0.047	3e-05
YDR152W	GIR2		1.10226	0.038	1.08814	0.036	0.00701	0.038	1e-05
YDR153C	ENT5		1.07339	0.045	0.98611	0.069	0.08742	0.045	2e-05
YDR154C	YDR154C		0.96382	0.034	0.90056	0.117	0.06308	0.034	0.00041	status=JK
YDR155C	CPR1		1.10812	0.068	1.00203	0.149	0.10691	0.068	6e-05
YDR156W	RPA14		0.9538	0.046	0.9715	0.082	0.00319	0.046	3e-05
YDR157W	YDR157W		1.03955	0.071	1.11579	0.009	-0.07654	0.071	9e-05
YDR158W	HOM2		0.8559	0.065	0.86508	0.052	-0.0026	0.065	0.00012
YDR159W	SAC3		0.66989	0.04	0.78956	0.035	-0.11424	0.039	6e-05
YDR161W	YDR161W		0.89588	0.021	0.9686	0.077	-0.07732	0.021	0.00018	status=JK
YDR162C	NBP2		0.81886	0.021	0.90749	0.117	-0.12657	0.02	0
YDR163W	CWC15		1.15663	0.027	1.14358	0.033	0.01268	0.027	0.00018	status=JK
YDR165W	TRM82		0.89971	0.086	0.96051	0.05	-0.06285	0.086	0.00024
YDR169C	STB3		1.02336	0.063	1.05378	0.147	0.00579	0.063	6e-05
YDR171W	HSP42		1.01761	0.099	0.93949	0.238	0.02059	0.099	0.00025
YDR173C	ARG82		0.53011	0.04	0.6151	0.057	-0.09631	0.04	0.00012
YDR174W	HMO1		0.63053	0.004	0.69449	0.049	-0.06327	0.004	1e-05	status=JK
YDR178W	SDH4		0.97638	0.036	1.11909	0.065	-0.1459	0.036	1e-05
YDR179C	CSN9		1.14211	0.095	1.02919	0.16	0.13584	0.095	0.00016
YDR179W-A	YDR179W-A		0.94905	0.089	0.88009	0.129	0.06009	0.089	0.00023
YDR181C	SAS4		0.97536	0.126	0.79897	0.057	0.19848	0.126	0.00058
YDR183W	PLP1		0.89468	0.047	0.95968	0.086	-0.09098	0.047	4e-05
YDR184C	ATC1		0.91778	0.042	0.9113	0.013	0.00926	0.042	3e-05
YDR185C	UPS3		1.0726	0.032	1.13399	0.01	-0.06085	0.031	1e-05
YDR186C	YDR186C		1.05698	0.028	1.00271	0.058	0.0656	0.028	0.00023	status=JK
YDR191W	HST4		0.86525	0.066	0.83795	0.045	0.02628	0.066	0.00012
YDR192C	NUP42		1.06886	0.061	1.09666	0.027	-0.02516	0.06	5e-05
YDR193W	YDR193W		1.02714	0.006	1.03779	0.003	-0.01083	0.006	1e-05	status=JK
YDR198C	RKM2		1.07556	0.052	1.0252	0.066	0.05805	0.052	3e-05
YDR199W	YDR199W		1.08336	0.038	1.07263	0.034	0.00373	0.038	1e-05
YDR202C	RAV2		0.86112	0.016	0.87041	0.115	-0.00551	0.016	0.00011	status=JK
YDR203W	YDR203W		0.99252	0.027	0.9856	0.136	-0.01058	0.027	1e-05
YDR205W	MSC2		1.02743	0.032	1.00832	0.025	0.02355	0.032	1e-05
YDR206W	EBS1		1.02282	0.03	1.00978	0.031	0.01967	0.03	1e-05
YDR207C	UME6		0.5967	0.033	0.66943	0.002	-0.0722	0.033	5e-05
YDR209C	YDR209C		1.00088	0.021	1.01719	0.009	-0.01871	0.021	0
YDR210W	YDR210W		1.11271	0.055	1.08559	0.016	0.02716	0.055	3e-05
YDR213W	UPC2		0.9967	0.005	0.99681	0.017	0.0006	0.005	1e-05	status=JK
YDR214W	AHA1		1.05868	0.013	1.08954	0.026	-0.03163	0.013	5e-05	status=JK
YDR215C	YDR215C		1.05083	0.02	1.05619	0.034	-0.00776	0.02	0
YDR216W	ADR1		0.94193	0.031	0.95308	0.003	-0.01212	0.031	1e-05
YDR217C	RAD9		0.99799	0.051	0.98401	0.037	0.00339	0.051	4e-05
YDR218C	SPR28		0.95556	0.078	0.95561	0.114	-0.02186	0.078	0.00015
YDR219C	MFB1		0.87675	0.045	0.88196	0.003	-0.00656	0.045	4e-05
YDR220C	YDR220C		1.07605	0.01	1.0368	0.062	0.04101	0.01	0
YDR221W	GTB1		1.06721	0.026	1.06027	0.012	0.00554	0.026	0
YDR222W	YDR222W		0.97852	0.035	0.97464	0.008	0.00394	0.034	1e-05
YDR223W	CRF1		1.0308	0.081	1.02701	0.049	-0.00391	0.081	0.00013
YDR225W	HTA1		0.85278	0.106	0.85513	0.089	-0.02285	0.106	0.00052
YDR227W	SIR4		0	0	0	0	0	0	#NUM!
YDR229W	IVY1		1.00421	0.072	1.04855	0.013	-0.04371	0.072	0.0001
YDR233C	RTN1		0.97696	0.006	0.9845	0.022	-0.00804	0.006	0
YDR234W	LYS4		0.46459	0.028	0.69535	0.033	-0.22919	0.028	6e-05
YDR239C	YDR239C		1.03874	0.065	0.99795	0.071	0.05839	0.065	7e-05
YDR241W	YDR241W		0.83059	0.103	0.93181	0.073	-0.11751	0.102	0.00051
YDR242W	AMD2		1.09905	0.031	1.02302	0.104	0.04531	0.031	0.00027	status=JK
YDR244W	PEX5		0.84575	0.015	0.90569	0.052	-0.05799	0.015	0
YDR245W	MNN10		0.86727	0.034	0.89541	0.028	-0.02663	0.034	2e-05
YDR247W	VHS1		0.99153	0.01	0.96267	0.05	0.03467	0.01	0
YDR248C	YDR248C		1.06842	0.028	1.06697	0.019	0.00408	0.028	1e-05
YDR249C	YDR249C		1.0837	0.014	1.061	0.055	-0.00259	0.014	6e-05	status=JK
YDR250C	YDR250C		1.01753	0.04	1.02357	0.038	-0.006	0.04	2e-05
YDR251W	PAM1		1.0616	0.04	1.01808	0.04	0.05166	0.04	1e-05
YDR252W	BTT1		1.03859	0.048	1.06937	0.021	-0.02899	0.048	3e-05
YDR253C	MET32		0.97189	0.068	0.99375	0.058	-0.03842	0.067	9e-05
YDR254W	CHL4		1.03365	0.024	1.07165	0.091	-0.06729	0.024	0.00019	status=JK
YDR255C	RMD5		1.03863	0.029	1.04443	0.038	-0.01556	0.029	1e-05
YDR256C	CTA1		1.03901	0.051	1.0237	0.009	0.01289	0.051	3e-05
YDR257C	RKM4		0.93718	0.1	0.89437	0.044	0.03859	0.1	0.00034
YDR258C	HSP78		0.96087	0.131	1.00662	0.066	-0.06264	0.13	0.00068
YDR259C	YAP6		0.93738	0.351	1.03944	0.103	-0.11053	0.35	0.0128
YDR260C	SWM1		1.0667	0.058	1.13355	0.041	-0.05726	0.058	5e-05
YDR261C	EXG2		1.08276	0.051	1.06308	0.072	0.00854	0.051	3e-05
YDR262W	YDR262W		1.03644	0.055	1.06401	0.003	-0.02852	0.055	4e-05
YDR263C	DIN7		0.95336	0.025	0.94555	0.024	0.00962	0.025	0
YDR265W	PEX10		0.95196	0.01	0.9686	0.043	-0.00376	0.01	4e-05	status=JK
YDR266C	HEL2		1.05132	0.033	1.09702	0.026	-0.04908	0.033	1e-05
YDR269C	YDR269C		1.0342	0.102	1.05487	0.048	-0.02557	0.102	0.00027
YDR270W	CCC2		1.02461	0.026	1.03618	0.023	-0.01678	0.026	0
YDR271C	YDR271C		1.07265	0.03	0.97103	0.046	0.10002	0.03	0.00027	status=JK
YDR272W	GLO2		1.01517	0.033	1.02455	0.004	-0.01008	0.032	1e-05
YDR273W	DON1		1.03314	0.051	1.01708	0.016	0.00777	0.051	3e-05
YDR274C	YDR274C		1.06889	0.019	1.06786	0.098	0.01572	0.019	0
YDR275W	BSC2		0.96306	0.044	0.99106	0.051	-0.02405	0.044	3e-05
YDR276C	PMP3		0.96604	0.06	0.96746	0.041	-0.01402	0.06	7e-05
YDR277C	MTH1		0.97231	0.027	1.026	0.004	-0.05273	0.027	1e-05
YDR278C	YDR278C		0.89618	0.037	0.83805	0.073	0.04167	0.037	0.00058	status=JK
YDR279W	RNH202		0.9584	0.048	0.9622	0.045	-0.01184	0.048	3e-05
YDR281C	PHM6		1.04038	0.043	1.0898	0.042	-0.04153	0.043	2e-05
YDR282C	YDR282C		1.08387	0.093	1.08749	0.116	-0.03987	0.093	0.00017
YDR284C	DPP1		1.01176	0.069	1.02627	0.044	-0.01155	0.068	9e-05
YDR285W	ZIP1		1.13015	0.043	1.10965	0.048	0.04716	0.043	0.00049	status=JK
YDR286C	YDR286C		0.96411	0.032	1.01951	0.012	-0.05646	0.032	1e-05
YDR287W	INM2		1.02394	0.03	1.06512	0.051	-0.04385	0.03	1e-05
YDR289C	RTT103		0.7565	0.012	0.88413	0.017	-0.12298	0.012	8e-05	status=JK
YDR290W	YDR290W		0.77498	0.027	0.85823	0.016	-0.08371	0.027	1e-05
YDR291W	HRQ1		1.02602	0.049	0.76711	0.051	0.27434	0.048	0.00075	status=JK
YDR293C	SSD1		1.23736	0.01	1.21205	0.287	0.01968	0.01	2e-05	status=JK
YDR294C	DPL1		0.96227	0.011	0.85934	0.181	0.05957	0.011	4e-05	status=JK
YDR297W	SUR2		0.91275	0.062	0.97469	0.039	-0.05587	0.062	8e-05
YDR304C	CPR5		1.00159	0.062	0.93418	0.113	0.06336	0.062	7e-05
YDR305C	HNT2		1.02	0.059	0.99158	0.06	0.03267	0.059	5e-05
YDR306C	YDR306C		0.98225	0.009	0.93867	0.08	0.03068	0.009	3e-05	status=JK
YDR307W	PMT7		1.02602	0.031	0.99498	0.095	0.04877	0.03	0.00029	status=JK
YDR309C	GIC2		1.02209	0.028	1.03471	0.034	-0.01009	0.028	1e-05
YDR310C	SUM1		1.10465	0.046	1.06052	0.048	0.03931	0.046	2e-05
YDR312W	SSF2		1.12417	0.057	1.16028	0.003	-0.03652	0.057	4e-05
YDR313C	PIB1		1.03163	0.045	1.00936	0.035	0.02674	0.045	2e-05
YDR314C	RAD34		1.07348	0.025	1.10168	0.038	-0.02471	0.025	0
YDR315C	IPK1		0.90276	0.059	0.90024	0.026	0.00246	0.059	8e-05
YDR316W	OMS1		0.83087	0.049	0.87697	0.046	-0.04009	0.049	6e-05
YDR317W	HIM1		1.0713	0.083	1.13506	0.061	-0.0508	0.082	0.00013
YDR318W	MCM21		1.03264	0.032	1.05939	0.043	-0.03577	0.032	0.00032	status=JK
YDR319C	YFT2		1.04113	0.052	1.04349	0.019	-0.00165	0.052	4e-05
YDR320C	SWA2		0.89816	0.044	0.93165	0.012	-0.04063	0.044	3e-05
YDR321W	ASP1		1.0799	0.062	1.05579	0.071	0.02798	0.062	5e-05
YDR326C	YSP2		1.08437	0.069	0.74294	0.206	0.33901	0.069	7e-05
YDR329C	PEX3		0.86794	0.045	0.91113	0.027	-0.03894	0.045	4e-05
YDR330W	UBX5		1.14915	0.01	1.09967	0.038	0.05659	0.01	2e-05	status=JK
YDR332W	IRC3		1.00913	0.006	0.98312	0.023	0.02262	0.006	1e-05	status=JK
YDR333C	YDR333C		1.00766	0.01	1.02304	0.038	-0.01409	0.01	3e-05	status=JK
YDR334W	SWR1		0.72887	0.063	0.74487	0.008	-0.01537	0.063	0.00018
YDR335W	MSN5		0.87801	0.013	0.87295	0.063	0.01228	0.013	7e-05	status=JK
YDR336W	YDR336W		0.72178	0.071	0.77294	0.117	-0.05897	0.071	0.00026
YDR338C	YDR338C		0.98328	0.097	0.96929	0.12	0.04652	0.097	0.00026
YDR340W	YDR340W		1.04972	0.059	1.04187	0.021	0.00876	0.059	5e-05
YDR344C	YDR344C		1.02335	0.062	1.02211	0.049	-0.00162	0.062	6e-05
YDR345C	HXT3		1.01235	0.024	1.02938	0.01	-0.01838	0.024	0
YDR346C	SVF1		1.01463	0.049	1.02877	0.043	-0.02211	0.049	3e-05
YDR348C	PAL1		0.92206	0.085	0.94201	0.086	-0.02394	0.084	0.00021
YDR349C	YPS7		1.02358	0.024	1.02287	0.068	0.00542	0.023	0
YDR351W	SBE2		1.00759	0.032	1.00024	0.033	0.00529	0.032	1e-05
YDR352W	YPQ2		1.10552	0.063	1.08304	0.093	0.0127	0.062	5e-05
YDR354W	TRP4		0.96578	0.044	0.95611	0.031	0.01164	0.044	3e-05
YDR357C	CNL1		0.98712	0.013	0.95685	0.08	0.01465	0.013	0
YDR358W	GGA1		1.0442	0.082	1.08621	0.048	-0.04709	0.082	0.00013
YDR359C	EAF1		0.38745	0.004	0.47689	0.035	-0.09159	0.004	3e-05	status=JK
YDR360W	YDR360W		0.91584	0.024	0.96309	0.029	-0.04654	0.024	1e-05
YDR363W	ESC2		0.96977	0.046	0.93678	0.042	0.04354	0.046	3e-05
YDR363W-A	SEM1		1.04651	0.026	1.03563	0.046	0.03433	0.026	0.00021	status=JK
YDR368W	YPR1		1.01475	0.002	0.98172	0.01	0.03698	0.002	0	status=JK
YDR369C	XRS2		1.09207	0.011	1.0576	0.025	0.03226	0.011	3e-05	status=JK
YDR370C	YDR370C		0.95927	0.004	1.02456	0.061	-0.07575	0.004	1e-05	status=JK
YDR371W	CTS2		1.07767	0.043	1.04809	0.035	0.03156	0.043	0.00052	status=JK
YDR372C	VPS74		0.99456	0.056	1.00989	0.041	-0.02091	0.056	5e-05
YDR374C	YDR374C		0.9457	0.097	1.00868	0.17	-0.05673	0.096	0.00029
YDR375C	BCS1		0.56059	0.047	0.84948	0.003	-0.29036	0.047	0.00016
YDR378C	LSM6		0.58326	0.024	0.72348	0.034	-0.13787	0.024	0.00055	status=JK
YDR379W	RGA2		1.02941	0.026	1.02346	0.033	0.00746	0.026	0
YDR380W	ARO10		0.96103	0.05	0.90945	0.005	0.0508	0.05	4e-05
YDR382W	RPP2B		1.06167	0.031	1.08017	0.077	-0.01706	0.031	1e-05
YDR383C	NKP1		0.81066	0.042	0.87149	0.019	-0.05834	0.042	4e-05
YDR384C	ATO3		1.01145	0.075	1.02105	0.093	-0.03333	0.075	0.00011
YDR385W	EFT2		0.90837	0.075	0.89464	0.025	0.01387	0.075	0.00015
YDR386W	MUS81		0.9882	0.103	1.02004	0.028	-0.04568	0.103	0.00031
YDR387C	YDR387C		1.05481	0.019	1.04937	0.021	0.00239	0.019	0.0001	status=JK
YDR388W	RVS167		0.65438	0.048	0.7976	0.031	-0.14672	0.048	0.00011
YDR389W	SAC7		0.89259	0.03	0.92201	0.098	-0.03076	0.03	1e-05
YDR391C	YDR391C		1.025	0.034	1.07367	0.048	-0.05009	0.034	1e-05
YDR392W	SPT3		0.69494	0.015	0.76378	0.032	-0.06814	0.015	0
YDR393W	SHE9		0.69637	0.083	0.78711	0.037	-0.08115	0.083	0.00046
YDR395W	SXM1		1.06891	0.059	1.05819	0.098	-0.00707	0.059	5e-05
YDR399W	HPT1		1.00476	0.063	0.98598	0.057	0.01861	0.063	7e-05
YDR400W	URH1		1.01046	0.018	1.04216	0.078	-0.01588	0.018	0.00011	status=JK
YDR401W	YDR401W		1.11309	0.041	1.10961	0.102	0.02577	0.041	1e-05
YDR402C	DIT2		1.08362	0.056	1.08405	0.075	-0.00429	0.056	4e-05
YDR403W	DIT1		0.98042	0.035	0.99111	0.056	-0.02009	0.035	1e-05
YDR406W	PDR15		1.02882	0.04	0.93266	0.103	0.11583	0.04	2e-05
YDR408C	ADE8		1.01125	0.04	1.10663	0.018	-0.08644	0.04	2e-05
YDR409W	SIZ1		1.00869	0.039	1.01418	0.009	-0.00422	0.039	2e-05
YDR410C	STE14		0	0	0	0	0	0	#NUM!
YDR411C	DFM1		0.98785	0.051	0.99932	0.032	-0.01394	0.051	4e-05
YDR414C	ERD1		0.87769	0.061	1.00187	0.036	-0.10633	0.061	9e-05
YDR415C	YDR415C		0.98712	0.162	0.91991	0.095	0.0655	0.162	0.00119
YDR419W	RAD30		0.97748	0.004	0.89593	0.129	0.08546	0.004	1e-05	status=JK
YDR420W	HKR1		0.95248	0.008	0.90948	0.113	0.03136	0.008	2e-05	status=JK
YDR421W	ARO80		0.96859	0.034	0.91732	0.147	0.05809	0.034	1e-05
YDR422C	SIP1		1.02965	0.042	1.09574	0.073	-0.06239	0.042	2e-05
YDR423C	CAD1		1.0213	0.005	0.98803	0.112	0.02664	0.005	1e-05	status=JK
YDR424C	DYN2		0.94561	0.043	0.95242	0.108	0.00777	0.043	3e-05
YDR425W	SNX41		0.79079	0.015	0.84956	0.054	-0.0668	0.015	0.00012	status=JK
YDR426C	YDR426C		0.91157	0.004	0.93905	0.038	-0.02993	0.004	1e-05	status=JK
YDR428C	BNA7		1.04112	0.046	1.02412	0.032	0.01375	0.046	2e-05
YDR430C	CYM1		1.07677	0.041	1.0734	0.008	0.00032	0.041	1e-05
YDR431W	YDR431W		0.89262	0.013	0.89802	0.016	-0.00501	0.013	7e-05	status=JK
YDR435C	PPM1		1.00923	0.059	1.09674	0.053	-0.08363	0.059	6e-05
YDR436W	PPZ2		1.15586	0.042	1.13069	0.043	0.03002	0.042	1e-05
YDR438W	THI74		1.00363	0.079	1.01458	0.008	-0.01035	0.078	0.00013
YDR439W	LRS4		1.13004	0.062	1.15196	0.027	-0.02533	0.061	4e-05
YDR440W	DOT1		1.05502	0.084	1.03099	0.09	0.01985	0.084	0.00014
YDR441C	APT2		0.93245	0.009	0.96563	0.056	-0.0444	0.009	3e-05	status=JK
YDR444W	YDR444W		1.10904	0.006	1.13899	0.011	-0.02846	0.006	1e-05	status=JK
YDR445C	YDR445C		1.04411	0.035	1.00753	0.034	0.02895	0.035	1e-05
YDR446W	ECM11		0.96815	0.045	1.00144	0.026	-0.03824	0.045	3e-05
YDR447C	RPS17B		1.02324	0.04	1.03277	0.036	-0.00143	0.04	2e-05
YDR451C	YHP1		0.98293	0.053	1.0009	0.029	-0.01789	0.053	4e-05
YDR452W	PPN1		1.11167	0.088	1.0844	0.061	0.02589	0.088	0.00014
YDR453C	TSA2		1.06471	0.026	0.99701	0.048	0.07213	0.026	0
YDR455C	YDR455C		0.98251	0.04	0.95907	0.084	0.02483	0.04	0.00056	status=JK
YDR458C	HEH2		0.97101	0.007	1.01171	0.057	-0.02931	0.007	2e-05	status=JK
YDR459C	PFA5		0.92593	0.049	0.92233	0.019	-0.00143	0.049	4e-05
YDR461W	MFA1		0.8584	0.081	0.8775	0.146	-0.04694	0.081	0.00023
YDR463W	STP1		0.93794	0.069	0.96752	0.075	-0.02999	0.069	0.00011
YDR465C	RMT2		1.10107	0.023	1.11546	0.011	-0.01217	0.023	0
YDR466W	PKH3		1.02605	0.087	0.99629	0.038	0.02845	0.086	0.00016
YDR467C	YDR467C		1.10096	0.01	1.0713	0.026	0.02853	0.01	3e-05	status=JK
YDR469W	SDC1		0.8728	0.005	0.8837	0.018	-0.01009	0.005	1e-05	status=JK
YDR471W	RPL27B		0.82729	0.012	0.86664	0.001	-0.039	0.012	7e-05	status=JK
YDR474C	YDR474C		1.05745	0.084	0.99969	0.05	0.05753	0.084	0.00014
YDR475C	JIP4		1.01893	0.077	0.98279	0.028	0.02728	0.077	0.00012
YDR476C	YDR476C		0.90053	0.102	0.93085	0.041	-0.03419	0.102	0.0004
YDR477W	SNF1		0.87324	0.068	0.93313	0.043	-0.04286	0.068	0.00013
YDR479C	PEX29		1.04223	0.002	0.99933	0.038	0.05384	0.002	0	status=JK
YDR480W	DIG2		1.07608	0.029	1.11955	0.078	-0.03237	0.029	0.00024	status=JK
YDR481C	PHO8		1.04743	0.084	1.01826	0.079	0.04632	0.083	0.00014
YDR482C	CWC21		1.0185	0.103	0.99963	0.102	0.01566	0.103	0.00028
YDR483W	KRE2		1.00761	0.116	1.03668	0.044	-0.02002	0.116	0.00042
YDR483W	KRE2		1.06405	0.021	1.05578	0.044	0.02855	0.021	0
YDR485C	VPS72		0.84446	0.013	0.84867	0.043	0.00268	0.013	8e-05	status=JK
YDR486C	VPS60		0.83945	0.067	0.92972	0.015	-0.08934	0.067	0.00014
YDR488C	PAC11		0.9746	0.024	0.89814	0.025	0.07367	0.024	0
YDR490C	PKH1		1.12106	0.029	1.06989	0.072	0.03823	0.028	0.00022	status=JK
YDR491C	YDR491C		1.02514	0.077	1.01552	0.047	0.01196	0.077	0.00011
YDR492W	IZH1		1.09778	0.028	1.07103	0.036	0.03615	0.027	0.00021	status=JK
YDR493W	MZM1		1.03068	0.004	0.89573	0.163	0.11605	0.004	0	status=JK
YDR494W	RSM28		1.04899	0.066	1.0056	0.061	0.04741	0.066	7e-05
YDR496C	PUF6		0.7198	0.03	0.77163	0.033	-0.06031	0.03	2e-05
YDR497C	ITR1		1.06407	0.079	1.08302	0.036	-0.02617	0.079	0.00011
YDR500C	RPL37B		0	0	0	0	0	0	#NUM!
YDR501W	PLM2		1.14453	0.068	1.11882	0.039	0.0334	0.068	6e-05
YDR502C	SAM2		0.99619	0.063	0.9898	0.098	-0.00077	0.063	7e-05
YDR503C	LPP1		1.03286	0.006	1.03797	0.027	-0.00991	0.006	1e-05	status=JK
YDR504C	SPG3		0.9625	0.114	0.96681	0.029	-0.00927	0.114	0.00045
YDR505C	PSP1		0.84991	0.083	0.93404	0.06	-0.0647	0.083	0.00025
YDR506C	GMC1		0.9767	0.128	1.00269	0.042	-0.02269	0.128	0.00061
YDR508C	GNP1		1.02222	0.1	0.97758	0.087	0.03044	0.099	0.00025
YDR509W	YDR509W		0.89921	0.017	0.93105	0.036	-0.02728	0.017	0
YDR511W	ACN9		1.01765	0.032	1.04492	0.062	-0.02735	0.032	1e-05
YDR512C	EMI1		0.65071	0.08	0.73516	0.021	-0.08626	0.08	0.00051
YDR513W	GRX2		1.04815	0.008	1.06846	0.029	-0.02622	0.008	2e-05	status=JK
YDR514C	YDR514C		0.33707	0.279	0.45772	0.329	-0.07692	0.278	0.09418
YDR515W	SLF1		1.08546	0.069	1.0392	0.098	0.02059	0.069	7e-05
YDR516C	EMI2		1.0479	0.061	1.03153	0.061	0.0224	0.061	6e-05
YDR517W	GRH1		0.99417	0.039	1.02231	0.035	-0.03513	0.039	2e-05
YDR519W	FPR2		1.0173	0.045	0.98096	0.035	0.04385	0.045	2e-05
YDR520C	URC2		1.055	0.021	1.04174	0.016	0.0071	0.021	0
YDR522C	SPS2		0.91718	0.115	0.99878	0.056	-0.08403	0.115	0.00054
YDR524C	AGE1		0.94427	0.091	0.95193	0.103	-0.00127	0.091	0.00024
YDR525W	YDR525W		1.03882	0.028	0.97385	0.042	0.05482	0.028	0.00024	status=JK
YDR525W-A	SNA2		1.0138	0.078	1.01081	0.038	0.00052	0.078	0.00012
YDR528W	HLR1		1.06485	0.062	1.08685	0.042	-0.01154	0.062	5e-05
YDR530C	APA2		1.00505	0.018	1.01853	0.019	-0.01221	0.018	0.0001	status=JK
YDR532C	KRE28		0.2541	0.061	0.28014	0.047	-0.02232	0.061	0.00366
YDR533C	HSP31		0.9499	0.1	0.99321	0.011	-0.04395	0.1	0.00032
YDR534C	FIT1		0.87376	0.189	0.95273	0.014	-0.08342	0.189	0.00269
YDR535C	YDR535C		1.00773	0.01	1.0031	0.016	-0.00366	0.01	3e-05	status=JK
YDR536W	STL1		0.99727	0.139	0.99933	0.029	-0.00096	0.138	0.00073
YDR537C	YDR537C		0.91411	0.161	0.97328	0.004	-0.06091	0.161	0.00147
YDR538W	PAD1		0.82998	0.166	0.8028	0.078	0.03853	0.166	0.00214
YDR539W	FDC1		1.04449	0.029	0.92709	0.113	0.12523	0.029	0.00026	status=JK
YDR540C	IRC4		1.01273	0.127	1.04901	0.026	-0.02386	0.127	0.00054
YDR541C	YDR541C		1.06486	0.059	1.00028	0.043	0.05592	0.059	5e-05
YEL001C	IRC22		#NUM!	#NUM!	#NUM!	#NUM!	#NUM!	#NUM!	#NUM!	status=LK
YEL003W	GIM4		#NUM!	#NUM!	#NUM!	#NUM!	#NUM!	#NUM!	#NUM!	status=LK
YEL004W	YEA4		#NUM!	#NUM!	#NUM!	#NUM!	#NUM!	#NUM!	#NUM!	status=LK
YEL005C	VAB2		#NUM!	#NUM!	#NUM!	#NUM!	#NUM!	#NUM!	#NUM!	status=LK
YEL006W	YEA6		#NUM!	#NUM!	#NUM!	#NUM!	#NUM!	#NUM!	#NUM!	status=LK
YEL007W	MIT1		#NUM!	#NUM!	#NUM!	#NUM!	#NUM!	#NUM!	#NUM!	status=LK
YEL008W	YEL008W		#NUM!	#NUM!	#NUM!	#NUM!	#NUM!	#NUM!	#NUM!	status=LK
YEL010W	YEL010W		#NUM!	#NUM!	#NUM!	#NUM!	#NUM!	#NUM!	#NUM!	status=LK
YEL011W	GLC3		#NUM!	#NUM!	#NUM!	#NUM!	#NUM!	#NUM!	#NUM!	status=LK
YEL012W	UBC8		#NUM!	#NUM!	#NUM!	#NUM!	#NUM!	#NUM!	#NUM!	status=LK
YEL013W	VAC8		#NUM!	#NUM!	#NUM!	#NUM!	#NUM!	#NUM!	#NUM!	status=LK
YEL014C	YEL014C		#NUM!	#NUM!	#NUM!	#NUM!	#NUM!	#NUM!	#NUM!	status=LK
YEL015W	EDC3		#NUM!	#NUM!	#NUM!	#NUM!	#NUM!	#NUM!	#NUM!	status=LK
YEL016C	NPP2		#NUM!	#NUM!	#NUM!	#NUM!	#NUM!	#NUM!	#NUM!	status=LK
YEL017C-A	PMP2		#NUM!	#NUM!	#NUM!	#NUM!	#NUM!	#NUM!	#NUM!	status=LK
YEL017W	GTT3		#NUM!	#NUM!	#NUM!	#NUM!	#NUM!	#NUM!	#NUM!	status=LK
YEL020C	YEL020C		#NUM!	#NUM!	#NUM!	#NUM!	#NUM!	#NUM!	#NUM!	status=LK
YEL023C	YEL023C		#NUM!	#NUM!	#NUM!	#NUM!	#NUM!	#NUM!	#NUM!	status=LK
YEL025C	YEL025C		#NUM!	#NUM!	#NUM!	#NUM!	#NUM!	#NUM!	#NUM!	status=LK
YEL028W	YEL028W		#NUM!	#NUM!	#NUM!	#NUM!	#NUM!	#NUM!	#NUM!	status=LK
YEL030W	ECM10		#NUM!	#NUM!	#NUM!	#NUM!	#NUM!	#NUM!	#NUM!	status=LK
YEL031W	SPF1		#NUM!	#NUM!	#NUM!	#NUM!	#NUM!	#NUM!	#NUM!	status=LK
YEL033W	MTC7		#NUM!	#NUM!	#NUM!	#NUM!	#NUM!	#NUM!	#NUM!	status=LK
YEL037C	RAD23		#NUM!	#NUM!	#NUM!	#NUM!	#NUM!	#NUM!	#NUM!	status=LK
YEL038W	UTR4		#NUM!	#NUM!	#NUM!	#NUM!	#NUM!	#NUM!	#NUM!	status=LK
YEL039C	CYC7		#NUM!	#NUM!	#NUM!	#NUM!	#NUM!	#NUM!	#NUM!	status=LK
YEL040W	UTR2		#NUM!	#NUM!	#NUM!	#NUM!	#NUM!	#NUM!	#NUM!	status=LK
YEL041W	YEF1		#NUM!	#NUM!	#NUM!	#NUM!	#NUM!	#NUM!	#NUM!	status=LK
YEL042W	GDA1		#NUM!	#NUM!	#NUM!	#NUM!	#NUM!	#NUM!	#NUM!	status=LK
YEL043W	YEL043W		#NUM!	#NUM!	#NUM!	#NUM!	#NUM!	#NUM!	#NUM!	status=LK
YEL047C	FRD1		#NUM!	#NUM!	#NUM!	#NUM!	#NUM!	#NUM!	#NUM!	status=LK
YEL048C	TCA17		#NUM!	#NUM!	#NUM!	#NUM!	#NUM!	#NUM!	#NUM!	status=LK
YEL049W	PAU2		#NUM!	#NUM!	#NUM!	#NUM!	#NUM!	#NUM!	#NUM!	status=LK
YEL052W	AFG1		#NUM!	#NUM!	#NUM!	#NUM!	#NUM!	#NUM!	#NUM!	status=LK
YEL053C	MAK10		#NUM!	#NUM!	#NUM!	#NUM!	#NUM!	#NUM!	#NUM!	status=LK
YEL056W	HAT2		#NUM!	#NUM!	#NUM!	#NUM!	#NUM!	#NUM!	#NUM!	status=LK
YEL057C	YEL057C		#NUM!	#NUM!	#NUM!	#NUM!	#NUM!	#NUM!	#NUM!	status=LK
YEL059W	YEL059W		#NUM!	#NUM!	#NUM!	#NUM!	#NUM!	#NUM!	#NUM!	status=LK
YEL060C	PRB1		#NUM!	#NUM!	#NUM!	#NUM!	#NUM!	#NUM!	#NUM!	status=LK
YEL061C	CIN8		#NUM!	#NUM!	#NUM!	#NUM!	#NUM!	#NUM!	#NUM!	status=LK
YEL062W	NPR2		#NUM!	#NUM!	#NUM!	#NUM!	#NUM!	#NUM!	#NUM!	status=LK
YEL063C	CAN1		#NUM!	#NUM!	#NUM!	#NUM!	#NUM!	#NUM!	#NUM!	status=LK
YEL064C	AVT2		#NUM!	#NUM!	#NUM!	#NUM!	#NUM!	#NUM!	#NUM!	status=LK
YEL065W	SIT1		#NUM!	#NUM!	#NUM!	#NUM!	#NUM!	#NUM!	#NUM!	status=LK
YEL066W	HPA3		#NUM!	#NUM!	#NUM!	#NUM!	#NUM!	#NUM!	#NUM!	status=LK
YEL067C	YEL067C		#NUM!	#NUM!	#NUM!	#NUM!	#NUM!	#NUM!	#NUM!	status=LK
YEL068C	YEL068C		#NUM!	#NUM!	#NUM!	#NUM!	#NUM!	#NUM!	#NUM!	status=LK
YEL071W	DLD3		#NUM!	#NUM!	#NUM!	#NUM!	#NUM!	#NUM!	#NUM!	status=LK
YER001W	MNN1		#NUM!	#NUM!	#NUM!	#NUM!	#NUM!	#NUM!	#NUM!	status=LK
YER002W	NOP16		#NUM!	#NUM!	#NUM!	#NUM!	#NUM!	#NUM!	#NUM!	status=LK
YER004W	FMP52		#NUM!	#NUM!	#NUM!	#NUM!	#NUM!	#NUM!	#NUM!	status=LK
YER005W	YND1		#NUM!	#NUM!	#NUM!	#NUM!	#NUM!	#NUM!	#NUM!	status=LK
YER007C-A	TMA20		#NUM!	#NUM!	#NUM!	#NUM!	#NUM!	#NUM!	#NUM!	status=LK
YER007W	PAC2		#NUM!	#NUM!	#NUM!	#NUM!	#NUM!	#NUM!	#NUM!	status=LK
YER010C	YER010C		#NUM!	#NUM!	#NUM!	#NUM!	#NUM!	#NUM!	#NUM!	status=LK
YER011W	TIR1		#NUM!	#NUM!	#NUM!	#NUM!	#NUM!	#NUM!	#NUM!	status=LK
YER016W	BIM1		#NUM!	#NUM!	#NUM!	#NUM!	#NUM!	#NUM!	#NUM!	status=LK
YER019C-A	SBH2		#NUM!	#NUM!	#NUM!	#NUM!	#NUM!	#NUM!	#NUM!	status=LK
YER019W	ISC1		#NUM!	#NUM!	#NUM!	#NUM!	#NUM!	#NUM!	#NUM!	status=LK
YER020W	GPA2		#NUM!	#NUM!	#NUM!	#NUM!	#NUM!	#NUM!	#NUM!	status=LK
YER024W	YAT2		#NUM!	#NUM!	#NUM!	#NUM!	#NUM!	#NUM!	#NUM!	status=LK
YER027C	GAL83		#NUM!	#NUM!	#NUM!	#NUM!	#NUM!	#NUM!	#NUM!	status=LK
YER028C	MIG3		#NUM!	#NUM!	#NUM!	#NUM!	#NUM!	#NUM!	#NUM!	status=LK
YER030W	CHZ1		#NUM!	#NUM!	#NUM!	#NUM!	#NUM!	#NUM!	#NUM!	status=LK
YER031C	YPT31		#NUM!	#NUM!	#NUM!	#NUM!	#NUM!	#NUM!	#NUM!	status=LK
YER032W	FIR1		#NUM!	#NUM!	#NUM!	#NUM!	#NUM!	#NUM!	#NUM!	status=LK
YER033C	ZRG8		#NUM!	#NUM!	#NUM!	#NUM!	#NUM!	#NUM!	#NUM!	status=LK
YER034W	YER034W		#NUM!	#NUM!	#NUM!	#NUM!	#NUM!	#NUM!	#NUM!	status=LK
YER035W	EDC2		#NUM!	#NUM!	#NUM!	#NUM!	#NUM!	#NUM!	#NUM!	status=LK
YER038W-A	YER038W-A		#NUM!	#NUM!	#NUM!	#NUM!	#NUM!	#NUM!	#NUM!	status=LK
YER039C	HVG1		#NUM!	#NUM!	#NUM!	#NUM!	#NUM!	#NUM!	#NUM!	status=LK
YER039C-A	YER039C-A		#NUM!	#NUM!	#NUM!	#NUM!	#NUM!	#NUM!	#NUM!	status=LK
YER041W	YEN1		0.87174	0.03	0.99218	0.074	-0.12347	0.03	0.0004	status=JK
YER042W	MXR1		1.02914	0.043	0.99762	0.008	0.03145	0.043	2e-05
YER044C-A	MEI4		0.90049	0.062	0.89496	0.041	-0.00295	0.062	9e-05
YER045C	ACA1		1.07034	0.068	1.02823	0.056	0.04129	0.067	7e-05
YER046W	SPO73		1.0675	0.116	1.03474	0.021	0.03811	0.116	0.00035
YER046W-A	YER046W-A		0.9154	0.047	0.87081	0.027	0.05113	0.047	4e-05
YER047C	SAP1		0.93794	0.108	0.85555	0.019	0.08679	0.108	0.00042
YER048C	CAJ1		0.97915	0.043	1.01458	0.034	-0.03054	0.043	2e-05
YER049W	TPA1		0.99446	0.035	1.00454	0.045	-0.01358	0.035	1e-05
YER051W	JHD1		1.06942	0.029	1.13469	0.021	-0.05833	0.029	1e-05
YER052C	HOM3		0.97969	0.11	1.01287	0.004	-0.03096	0.11	0.00038
YER053C	PIC2		1.17742	0.074	1.12775	0.05	0.05608	0.073	7e-05
YER054C	GIP2		1.14164	0.115	1.11792	0.031	0.02623	0.115	0.00028
YER055C	HIS1		0.50608	0.004	0.47733	0.105	0.0343	0.004	2e-05	status=JK
YER056C	FCY2		1.0499	0.017	1.02791	0.012	0.01646	0.017	0
YER056C-A	RPL34A		0.92922	0.041	0.85248	0.02	0.0724	0.041	2e-05
YER057C	HMF1		1.04037	0.006	1.09975	0.034	-0.06135	0.006	1e-05	status=JK
YER059W	PCL6		1.06032	0.04	0.993	0.075	0.07898	0.04	0.00048	status=JK
YER060W	FCY21		1.0145	0.075	1.02753	0.034	-0.01132	0.075	0.00011
YER060W-A	FCY22		1.02337	0.038	1.00429	0.032	0.01435	0.038	1e-05
YER061C	CEM1		0.79157	0.048	0.8607	0.027	-0.06022	0.048	6e-05
YER062C	HOR2		1.01872	0.014	1.05316	0.023	-0.03045	0.014	6e-05	status=JK
YER063W	THO1		1.01784	0.057	0.99916	0.017	0.0191	0.057	5e-05
YER064C	VHR2		1.01521	0.037	1.00805	0.012	0.00873	0.037	1e-05
YER065C	ICL1		1.00877	0.073	0.9729	0.048	0.03303	0.073	0.00011
YER066C-A	YER066C-A		1.02368	0.067	1.0081	0.035	0.02178	0.067	8e-05
YER066W	RRT13		0.94381	0.027	0.97711	0.007	-0.03169	0.027	1e-05
YER067C-A	YER067C-A		0.97218	0.021	0.98783	0.034	-0.02067	0.021	0
YER067W	RGI1		1.02572	0.01	0.96606	0.092	0.04313	0.01	3e-05	status=JK
YER069W	ARG5		0.59344	0.046	0.67175	0.01	-0.0761	0.046	0.00013
YER071C	TDA2		1.05737	0.013	0.99537	0.015	0.05907	0.013	0
YER072W	VTC1		1.0733	0.037	1.0425	0.026	0.02675	0.037	1e-05
YER073W	ALD5		1.08457	0.011	1.03725	0.024	0.05607	0.011	3e-05	status=JK
YER074W	RPS24A		0.61139	0.053	0.6943	0.011	-0.08774	0.053	0.00018
YER075C	PTP3		0.94416	0.085	0.98414	0.047	-0.03275	0.085	0.0002
YER077C	YER077C		1.01136	0.011	1.02934	0.041	-0.02168	0.011	4e-05	status=JK
YER078C	ICP55		0.86522	0.136	0.89609	0.085	-0.02423	0.136	0.00105
YER079W	YER079W		0.98967	0.05	0.98622	0.033	0.00983	0.05	4e-05
YER080W	AIM9		1.07356	0.038	1.11476	0.035	-0.02116	0.038	1e-05
YER081W	SER3		0.94405	0.021	0.96753	0.103	-0.03428	0.021	0.00016	status=JK
YER083C	GET2		0.93505	0.062	0.88022	0.023	0.05138	0.062	8e-05
YER084W	YER084W		1.11337	0.048	1.05076	0.009	0.06537	0.048	2e-05
YER085C	YER085C		1.08518	0.034	1.10632	0.049	-0.00862	0.034	1e-05
YER087C-A	YER087C-A		1.12148	0.051	1.07162	0.003	0.05145	0.051	3e-05
YER088C	DOT6		0.9862	0.011	1.00755	0.007	-0.02352	0.011	4e-05	status=JK
YER089C	PTC2		1.00413	0.034	1.00258	0.028	0.01216	0.034	1e-05
YER090W	TRP2		1.07631	0.01	1.0043	0.088	0.05256	0.01	3e-05	status=JK
YER091C	MET6		0.99804	0.034	0.99293	0.005	0.00553	0.034	0.00039	status=JK
YER091C-A	YER091C-A		1.03658	0.045	0.97288	0.051	0.07649	0.045	2e-05
YER092W	IES5		0.85186	0.036	0.91687	0.003	-0.06446	0.036	2e-05
YER093C-A	AIM11		0.71658	0.068	0.71683	0.063	0.00189	0.068	0.00023
YER095W	RAD51		0.89773	0.035	0.96832	0.011	-0.06992	0.035	2e-05
YER096W	SHC1		0.83135	0.031	0.94753	0.063	-0.10147	0.031	0.00045	status=JK
YER097W	YER097W		1.02619	0.064	1.05837	0.011	-0.03512	0.063	7e-05
YER098W	UBP9		0.98832	0.034	0.95434	0.057	0.03205	0.034	1e-05
YER101C	AST2		1.01538	0.057	1.01293	0.005	0.0039	0.057	5e-05
YER106W	MAM1		0.89231	0.134	0.9932	0.065	-0.12825	0.133	0.00091
YER108C	YER108C		1.05672	0.026	1.04295	0.051	0.02199	0.026	0.0002	status=JK
YER109C	FLO8		1.01004	0.022	0.97194	0.042	0.03346	0.022	0
YER111C	SWI4		0.98087	0.054	0.96107	0.013	0.0255	0.054	5e-05
YER113C	TMN3		1.07283	0.069	1.04132	0.039	0.03906	0.069	7e-05
YER114C	BOI2		1.07088	0.022	1.02652	0.055	0.0428	0.022	0.00014	status=JK
YER115C	SPR6		1.13067	0.046	1.10995	0.076	0.01984	0.046	2e-05
YER116C	SLX8		0.42558	0.05	0.49525	0.075	-0.06069	0.05	0.00045
YER117W	RPL23B		0.9446	0.053	0.92494	0.048	0.01335	0.053	5e-05
YER118C	SHO1		1.05531	0.018	0.99706	0.031	0.04171	0.018	0.0001	status=JK
YER119C	AVT6		1.0249	0.057	0.98243	0.06	0.04972	0.057	5e-05
YER119C-A	YER119C-A		0.78881	0.074	0.79524	0.034	-0.00104	0.074	0.00023
YER120W	SCS2		0.79151	0.042	0.74454	0.047	0.05203	0.042	4e-05
YER121W	YER121W		1.05456	0.059	0.97549	0.019	0.07182	0.059	5e-05
YER123W	YCK3		0.91431	0.012	0.93826	0.016	-0.03252	0.012	6e-05	status=JK
YER124C	DSE1		0.9818	0.069	0.97924	0.051	0.00355	0.068	9e-05
YER128W	VFA1		1.00252	0.031	1.02255	0.019	-0.01413	0.031	1e-05
YER129W	SAK1		1.02943	0.048	1.02442	0.023	0.01108	0.047	3e-05
YER130C	YER130C		1.05415	0.067	1.07915	0.009	-0.02881	0.067	7e-05
YER131W	RPS26B		0.7499	0.038	0.66797	0.084	0.09684	0.038	4e-05
YER132C	PMD1		0.97503	0.046	0.95779	0.088	-0.00631	0.046	3e-05
YER134C	YER134C		0.96886	0.117	0.92474	0.105	0.04461	0.117	0.00048
YER135C	YER135C		0.90076	0.325	0.93161	0.158	-0.0769	0.325	0.01159
YER137C	YER137C		1.00431	0.099	1.05901	0.075	-0.04792	0.099	0.00026
YER139C	RTR1		0.8725	0.119	0.9544	0.138	-0.11777	0.119	0.00069
YER140W	YER140W		0.9985	0.048	1.04051	0.06	-0.02843	0.048	3e-05
YER142C	MAG1		0.99786	0.064	1.02011	0.047	-0.02492	0.064	7e-05
YER143W	DDI1		1.05932	0.057	0.99876	0.01	0.06217	0.057	4e-05
YER144C	UBP5		1.04402	0.088	1.03214	0.043	0.02224	0.087	0.00016
YER145C	FTR1		0.90682	0.079	0.97467	0.003	-0.06751	0.079	0.00018
YER149C	PEA2		1.02954	0.051	1.00486	0.069	0.0082	0.051	3e-05
YER150W	SPI1		1.01821	0.032	1.06691	0.014	-0.04743	0.032	1e-05
YER151C	UBP3		0.85737	0.046	0.83593	0.021	0.01713	0.046	4e-05
YER152C	YER152C		1.09574	0.051	1.07097	0.024	0.0303	0.051	3e-05
YER153C	PET122		0.66507	0.073	0.85883	0.02	-0.20003	0.073	0.00036
YER155C	BEM2		0.92226	0.055	0.96609	0.039	-0.03702	0.055	6e-05
YER156C	YER156C		0.90655	0.004	0.94348	0.008	-0.03955	0.004	0
YER158C	YER158C		1.23482	0.061	1.17095	0.061	0.08115	0.061	3e-05
YER161C	SPT2		0.91799	0.039	0.95773	0.068	-0.04008	0.039	2e-05
YER162C	RAD4		0.53768	0.024	0.57563	0.174	0.00367	0.024	0.00067	status=JK
YER163C	GCG1		1.06929	0.016	1.00885	0.034	0.06235	0.016	8e-05	status=JK
YER164W	CHD1		1.03204	0.078	0.99974	0.038	0.03473	0.078	0.00012
YER166W	DNF1		0.97014	0.099	0.9435	0.08	0.04409	0.099	0.00029
YER167W	BCK2		1.0203	0.015	0.99946	0.024	0.02159	0.015	7e-05	status=JK
YER170W	ADK2		1.05747	0.003	1.02362	0.013	0.033	0.003	0	status=JK
YER173W	RAD24		0.99072	0.119	1.03234	0.012	-0.04081	0.118	0.00047
YER174C	GRX4		1.0145	0.017	0.9887	0.004	0.02767	0.016	0
YER175C	TMT1		0.9689	0.014	0.93757	0.043	0.0253	0.014	7e-05	status=JK
YER176W	ECM32		0.98233	0.006	0.97992	0.045	0.00023	0.006	1e-05	status=JK
YER177W	BMH1		0.80306	0.113	0.76489	0.113	0.03619	0.113	0.00076
YER178W	PDA1		0.74138	0.055	0.8016	0.077	-0.07226	0.055	0.00011
YER179W	DMC1		0.94825	0.017	0.95797	0.039	-0.02009	0.017	0.00011	status=JK
YER180C	ISC10		0.98017	0.035	0.99937	0.026	-0.01581	0.035	1e-05
YER181C	YER181C		1.02429	0.034	1.02006	0.031	0.00331	0.034	1e-05
YER182W	FMP10		0.98502	0.051	1.00006	0.03	-0.01362	0.051	4e-05
YER183C	FAU1		1.02931	0.051	1.03195	0.012	0.00154	0.05	3e-05
YER184C	YER184C		1.06108	0.038	1.07009	0.009	-0.00899	0.038	1e-05
YER185W	PUG1		1.00702	0.069	1.03252	0.003	-0.02634	0.069	9e-05
YER186C	YER186C		1.01013	0.047	0.9997	0.009	0.00679	0.047	3e-05
YER187W	YER187W		1.08214	0.038	1.08496	0.034	-0.00466	0.038	1e-05
YER188W	YER188W		1.06509	0.017	1.02698	0.015	0.04275	0.017	9e-05	status=JK
YFL001W	DEG1		0.75413	0.046	0.73338	0.008	0.01908	0.046	6e-05
YFL003C	MSH4		1.15428	0.02	1.08345	0.034	0.06297	0.02	0.0001	status=JK
YFL004W	VTC2		1.03704	0.016	1.04354	0.013	-0.00195	0.016	8e-05	status=JK
YFL006W	YFL006W		0.9172	0.065	0.96741	0.09	-0.0728	0.065	0.0001
YFL007W	BLM10		0.95547	0.025	0.92862	0.005	0.02899	0.025	1e-05
YFL010C	WWM1		0.99676	0.031	0.99654	0.12	-0.011	0.031	0.00033	status=JK
YFL010W-A	AUA1		1.05	0.032	1.09304	0.041	-0.03964	0.032	1e-05
YFL011W	HXT10		0.96477	0.03	1.00313	0.041	-0.03266	0.03	1e-05
YFL012W	YFL012W		1.00628	0.037	0.98659	0.006	0.01877	0.037	1e-05
YFL013C	IES1		0.97744	0.026	0.96703	0.082	0.01906	0.026	0.00024	status=JK
YFL013W-A	YFL013W-A		0.87995	0.041	0.89729	0.057	-0.00881	0.041	3e-05
YFL014W	HSP12		0.98663	0.024	1.00665	0.064	-0.00513	0.024	0
YFL015C	YFL015C		1.20962	0.12	1.07982	0.061	0.09672	0.12	0.00329	status=JK
YFL018C	LPD1		0.96485	0.062	0.99187	0.006	-0.02744	0.062	7e-05
YFL019C	YFL019C		1.00483	0.049	1.00384	0.017	0.00428	0.048	3e-05
YFL020C	PAU5		0.99109	0.01	1.02367	0.016	-0.03585	0.01	0
YFL021W	GAT1		1.04688	0.015	1.06308	0.072	0.00285	0.015	7e-05	status=JK
YFL023W	BUD27		0.77186	0.005	0.82046	0.005	-0.0457	0.005	2e-05	status=JK
YFL025C	BST1		0.98142	0.057	1.01799	0.082	-0.05605	0.057	6e-05
YFL026W	STE2		0	0	0	0	0	0	#NUM!
YFL027C	GYP8		1.06305	0.047	1.00043	0.034	0.07262	0.047	0.00065	status=JK
YFL028C	CAF16		1.10479	0.006	1.03706	0.005	0.07043	0.006	1e-05	status=JK
YFL030W	AGX1		1.00177	0.019	0.93605	0.045	0.07444	0.019	0
YFL031W	HAC1		0.98421	0.111	0.95381	0.061	0.02631	0.111	0.00039
YFL032W	YFL032W		0.93179	0.183	1.03512	0.045	-0.10712	0.182	0.00201
YFL033C	RIM15		1.02174	0.047	1.02974	0.079	-0.01041	0.047	3e-05
YFL034C-A	RPL22B		1.05009	0.067	1.10301	0.068	-0.08884	0.067	7e-05
YFL034W	YFL034W		1.059	0.089	1.03988	0.031	0.02688	0.089	0.00236	status=JK
YFL035C-B	YFL035C-B		1.09162	0.082	1.03856	0.041	0.0635	0.082	0.00011
YFL036W	RPO41		0.71242	0.033	0.64149	0.081	0.05382	0.033	0.00072	status=JK
YFL040W	YFL040W		0.96176	0.107	0.9985	0.05	-0.02793	0.107	0.00038
YFL041W	FET5		1.0897	0.001	1.05403	0.061	0.02243	0.001	0	status=JK
YFL042C	YFL042C		1.05032	0.035	1.06557	0.013	-0.0184	0.035	1e-05
YFL043C	YFL043C		0.9902	0.035	0.98858	0.046	0.00186	0.035	1e-05
YFL044C	OTU1		1.05049	0.004	1.05494	0.018	-0.00343	0.004	0	status=JK
YFL046W	FMP32		0.98355	0.076	1.01758	0.043	-0.03949	0.076	0.00013
YFL047W	RGD2		0.96779	0.046	0.9457	0.12	0.04803	0.046	3e-05
YFL048C	EMP47		1.01027	0.109	1.11428	0.049	-0.10075	0.109	0.00034
YFL049W	SWP82		1.05128	0.062	1.01332	0.14	0.03076	0.062	6e-05
YFL050C	ALR2		1.07068	0.026	1.0535	0.028	0.01446	0.026	0.00019	status=JK
YFL051C	YFL051C		0.94035	0.047	0.93381	0.082	0.01017	0.047	4e-05
YFL052W	YFL052W		1.02625	0.012	1.04685	0.022	-0.01463	0.012	5e-05	status=JK
YFL053W	DAK2		1.02554	0.036	1.04906	0.024	-0.02256	0.036	1e-05
YFL054C	YFL054C		1.08927	0.011	1.06752	0.036	0.03017	0.011	3e-05	status=JK
YFL055W	AGP3		1.04324	0.034	1.05768	0.028	-0.009	0.034	1e-05
YFL056C	AAD6		0.99202	0.001	0.95329	0.104	0.05209	0.001	0	status=JK
YFL063W	YFL063W		1.05203	0.055	1.14372	0.036	-0.10344	0.055	4e-05
YFR006W	YFR006W		1.06813	0.041	1.05185	0.035	0.02056	0.041	2e-05
YFR007W	YFH7		1.00662	0.036	0.96295	0.018	0.04414	0.036	1e-05
YFR008W	FAR7		0.98152	0.052	0.93336	0.041	0.04661	0.052	4e-05
YFR009W	GCN20		1.04001	0.061	0.97938	0.046	0.06127	0.061	6e-05
YFR010W	UBP6		0.74181	0.05	0.74375	0.057	-0.00556	0.05	9e-05
YFR011C	AIM13		0.92531	0.068	0.91724	0.032	0.0222	0.068	0.00011
YFR012W	DCV1		0.94653	0.092	0.94428	0.126	0.01914	0.091	0.00025
YFR013W	IOC3		0.93938	0.042	0.92606	0.066	0.02407	0.042	2e-05
YFR014C	CMK1		1.0085	0.021	0.99565	0.078	0.01638	0.021	0
YFR015C	GSY1		1.04222	0.036	1.06313	0.008	-0.02045	0.036	1e-05
YFR016C	YFR016C		1.07091	0.015	1.07685	0.032	-0.00779	0.015	0
YFR017C	IGD1		1.04291	0.004	1.04044	0.019	0.00251	0.004	0	status=JK
YFR018C	YFR018C		1.03682	0.01	1.09401	0.035	-0.04792	0.01	0
YFR019W	FAB1		0.73734	0.004	0.69879	0.035	0.04894	0.004	1e-05	status=JK
YFR020W	YFR020W		1.07157	0.008	1.08268	0.08	-0.00586	0.008	2e-05	status=JK
YFR021W	ATG18		0.91	0.036	0.90263	0.042	0.0159	0.035	2e-05
YFR022W	ROG3		1.03497	0.015	1.0644	0.038	-0.02792	0.015	7e-05	status=JK
YFR023W	PES4		1.02286	0.015	1.02861	0.04	-0.00393	0.015	0
YFR024C	YFR024C		1.01099	0.039	1.03086	0.019	-0.01174	0.038	2e-05
YFR024C-A	LSB3		1.05035	0.076	1.06998	0.04	-0.02533	0.076	0.00011
YFR025C	HIS2		0.62699	0.018	0.61793	0.02	0.00974	0.018	1e-05
YFR026C	ULI1		1.01012	0.021	0.98987	0.002	0.02219	0.021	0
YFR030W	MET10		0.97335	0.072	0.98441	0.036	-0.00577	0.071	0.00011
YFR031C-A	RPL2A		0.91449	0.078	0.92862	0.014	-0.01685	0.078	0.00017
YFR032C	RRT5		1.09193	0.04	1.06698	0.066	0.03285	0.04	1e-05
YFR032C-A	RPL29		0.88359	0.106	0.92216	0.007	-0.0409	0.105	0.00047
YFR033C	QCR6		0.94845	0.041	0.92938	0.032	0.01199	0.041	2e-05
YFR034C	PHO4		0.95511	0.045	0.95755	0.035	-0.00253	0.044	3e-05
YFR035C	YFR035C		0.9825	0.048	1.04365	0.056	-0.05048	0.048	3e-05
YFR038W	IRC5		0.99004	0.057	1.03129	0.023	-0.02719	0.057	5e-05
YFR039C	YFR039C		1.00072	0.032	1.01636	0.008	-0.01322	0.032	1e-05
YFR040W	SAP155		0.89391	0.011	0.88899	0.061	-0.00566	0.011	5e-05	status=JK
YFR041C	ERJ5		0.99603	0.042	0.98896	0.012	0.01486	0.042	2e-05
YFR043C	IRC6		1.09091	0.042	1.10134	0.026	-0.00664	0.041	2e-05
YFR044C	DUG1		1.07398	0.034	1.03436	0.066	0.06087	0.034	1e-05
YFR045W	YFR045W		0.98403	0.041	1.04314	0.008	-0.05687	0.041	2e-05
YFR046C	CNN1		1.0464	0.085	1.08804	0.035	-0.04501	0.085	0.00015
YFR047C	BNA6		0.99524	0.06	0.9909	0.01	0.01082	0.06	6e-05
YFR048W	RMD8		1.03657	0.025	1.04836	0.017	-0.01011	0.025	0
YFR049W	YMR31		1.0136	0.027	1.02497	0.062	-0.02446	0.027	1e-05
YFR053C	HXK1		0.97224	0.034	0.99031	0.029	-0.02175	0.034	1e-05
YFR054C	YFR054C		1.07666	0.04	1.01377	0.078	0.07527	0.04	1e-05
YFR055W	IRC7		1.00559	0.016	1.02388	0.053	-0.00353	0.016	0
YFR056C	YFR056C		1.02209	0.013	0.98329	0.045	0.03122	0.013	6e-05	status=JK
YFR057W	YFR057W		1.05786	0.045	1.02095	0.063	0.03513	0.045	2e-05
YGL002W	ERP6		1.01079	0.044	1.01211	0.064	0.00632	0.044	2e-05
YGL004C	RPN14		1.03507	0.069	1.02482	0.085	0.03942	0.069	8e-05
YGL005C	COG7		0.98757	0.012	0.99824	0.078	-0.01026	0.012	5e-05	status=JK
YGL006W	PMC1		1.00003	0.014	1.01783	0.047	-0.01277	0.014	6e-05	status=JK
YGL007W	YGL007W		0.75858	0.017	0.7813	0.042	-0.02999	0.017	0
YGL009C	LEU1		0.99116	0.025	0.9631	0.126	0.01665	0.025	0
YGL010W	YGL010W		1.10104	0.012	1.10095	0.088	0.00311	0.012	0
YGL013C	PDR1		0.98303	0.049	0.96838	0.021	0.01413	0.049	3e-05
YGL014W	PUF4		1.05607	0.019	1.03277	0.058	0.00567	0.019	0.00011	status=JK
YGL015C	YGL015C		1.07615	0.025	1.08934	0.037	-0.01738	0.025	0
YGL016W	KAP122		0.85763	0.027	0.73813	0.081	0.10706	0.027	1e-05
YGL017W	ATE1		0.99106	0.052	1.03333	0.01	-0.04411	0.052	4e-05
YGL019W	CKB1		0.93656	0.015	0.94071	0.101	-0.00019	0.015	9e-05	status=JK
YGL020C	GET1		0.93623	0.073	0.99701	0.051	-0.05066	0.073	0.00013
YGL021W	ALK1		1.09783	0.037	1.08762	0.029	0.02543	0.037	1e-05
YGL023C	PIB2		0.85112	0.04	0.8694	0.065	-0.00297	0.04	3e-05
YGL024W	YGL024W		0.54477	0.002	0.72228	0.01	-0.17978	0.002	1e-05	status=JK
YGL026C	TRP5		0.00773	0.007	0	0	0.00772	0.007	0.10185
YGL027C	CWH41		0.97809	0.012	1.03671	0.059	-0.07106	0.012	0
YGL028C	SCW11		1.03494	0.005	1.09693	0.029	-0.06273	0.005	1e-05	status=JK
YGL029W	CGR1		0.94111	0.053	0.95495	0.044	-0.02216	0.053	5e-05
YGL031C	RPL24A		0.7123	0.05	0.71653	0.084	-0.002	0.05	0.0001
YGL032C	AGA2		1.07125	0.004	1.09156	0.073	-0.0387	0.004	0	status=JK
YGL034C	YGL034C		1.07307	0.009	1.07677	0.076	-0.00283	0.009	2e-05	status=JK
YGL035C	MIG1		1.02275	0.046	0.97524	0.024	0.0527	0.046	3e-05
YGL036W	YGL036W		0.9513	0.112	0.91973	0.023	0.02875	0.112	0.00044
YGL037C	PNC1		1.031	0.042	1.05885	0.046	-0.03119	0.042	2e-05
YGL039W	YGL039W		1.00519	0.068	1.03447	0.131	-0.00148	0.068	8e-05
YGL041C	YGL041C		1.00518	0.017	0.99005	0.081	0.00257	0.017	0.0001	status=JK
YGL042C	YGL042C		0.95624	0.061	0.97431	0.005	-0.01637	0.061	7e-05
YGL043W	DST1		0.85951	0.064	0.9073	0.046	-0.04997	0.063	0.00011
YGL045W	RIM8		0	0	0	0	0	0	#NUM!	status=JK
YGL046W	YGL046W		0.80435	0.036	0.77233	0.049	0.02244	0.036	2e-05
YGL049C	TIF4632		1.07245	0.026	1.03456	0.003	0.03794	0.026	0
YGL050W	TYW3		1.08928	0.058	1.05389	0.008	0.03519	0.058	4e-05
YGL051W	MST27		0.98139	0.019	0.94803	0.142	-0.00622	0.019	0.00012	status=JK
YGL053W	PRM8		1.02076	0.01	1.04447	0.097	-0.0019	0.009	0
YGL054C	ERV14		0.95008	0.066	0.974	0.125	-0.03272	0.066	9e-05
YGL056C	SDS23		1.02687	0.1	1.05951	0.058	-0.05312	0.1	0.00025
YGL057C	GEP7		0.80043	0.06	0.69158	0.156	0.07961	0.06	0.00012
YGL058W	RAD6		0.96047	0.066	1.0925	0.023	-0.13499	0.066	9e-05
YGL059W	PKP2		1.03666	0.042	1.06552	0.043	-0.02956	0.042	2e-05
YGL060W	YBP2		0.95999	0.085	1.00255	0.08	-0.02497	0.085	0.00019
YGL062W	PYC1		1.04789	0.04	1.08674	0.105	-0.05511	0.04	2e-05
YGL063W	PUS2		0.98682	0.032	0.94189	0.127	0.05347	0.032	1e-05
YGL066W	SGF73		0.74627	0.138	0.829	0.036	-0.08963	0.138	0.0017
YGL067W	NPY1		1.04471	0.009	1.03807	0.004	0.00691	0.009	3e-05	status=JK
YGL071W	AFT1		1.01864	0.007	0.94342	0.089	0.10088	0.007	1e-05	status=JK
YGL077C	HNM1		0.99684	0.004	0.98087	0.026	0.01704	0.004	0	status=JK
YGL078C	DBP3		0.77264	0.006	0.80757	0.025	-0.03868	0.006	0
YGL079W	KXD1		0.96723	0.016	0.9801	0.009	-0.01689	0.016	0
YGL080W	FMP37		0.81468	0.03	0.81381	0.021	0.01055	0.03	1e-05
YGL081W	YGL081W		1.0914	0.022	1.09409	0.052	0.01076	0.022	0.00014	status=JK
YGL082W	YGL082W		1.04811	0.023	1.01992	0.015	0.02993	0.023	0
YGL083W	SCY1		1.04518	0.009	1.0507	0.006	-0.00092	0.009	0
YGL084C	GUP1		0.87249	0.028	0.8829	0.007	-0.00724	0.028	1e-05
YGL085W	LCL3		0.98549	0.056	0.98666	0.11	-0.00884	0.055	5e-05
YGL086W	MAD1		1.00428	0.028	1.00475	0.014	0.00107	0.028	1e-05
YGL087C	MMS2		0.91603	0.043	0.93429	0.013	-0.01436	0.043	3e-05
YGL089C	MF(ALPHA)2		1.03933	0.032	1.05539	0.018	-0.01786	0.032	1e-05
YGL090W	LIF1		0.97747	0.013	0.99952	0.031	-0.01738	0.013	6e-05	status=JK
YGL094C	PAN2		1.06672	0.07	1.0115	0.021	0.05744	0.07	8e-05
YGL096W	TOS8		0.97903	0.041	0.96084	0.029	0.02392	0.041	2e-05
YGL101W	YGL101W		1.08956	0.067	1.02748	0.084	0.07794	0.067	6e-05
YGL104C	VPS73		1.01509	0.072	1.03348	0.008	-0.02139	0.072	0.0001
YGL105W	ARC1		0.00061	0.001	0.06218	0.081	-0.03864	0.001	0.42265	status=JK
YGL108C	YGL108C		1.04676	0.025	1.05657	0.05	-0.00674	0.025	0
YGL109W	YGL109W		1.04229	0.039	1.07265	0.044	-0.03208	0.039	1e-05
YGL110C	CUE3		0.98042	0.036	0.99688	0.005	-0.01434	0.036	1e-05
YGL114W	YGL114W		0.99131	0.034	1.01422	0.056	-0.00796	0.034	1e-05
YGL115W	SNF4		0.83812	0.004	0.83939	0.033	-0.00725	0.004	0
YGL117W	YGL117W		1.08283	0.023	1.1028	0.057	-0.01765	0.023	0
YGL118C	YGL118C		1.05182	0.003	1.04274	0.033	0.01182	0.003	0	status=JK
YGL121C	GPG1		1.05039	0.034	1.07995	0.011	-0.02927	0.034	0.00036	status=JK
YGL124C	MON1		0.89764	0.031	0.90623	0.061	-0.0051	0.031	1e-05
YGL125W	MET13		0.99359	0.023	1.03922	0.014	-0.0411	0.023	0.00018	status=JK
YGL126W	SCS3		0.94759	0.09	0.9397	0.028	0.00735	0.089	0.00023
YGL127C	SOH1		0.69654	0.028	0.71148	0.029	-0.02123	0.028	2e-05
YGL131C	SNT2		1.02175	0.017	0.98111	0.03	0.04753	0.017	0
YGL132W	YGL132W		1.01081	0.026	0.93102	0.177	0.05329	0.026	0
YGL133W	ITC1		0.94214	0.048	0.94833	0.133	-0.03227	0.048	4e-05
YGL136C	MRM2		0.14165	0.05	0.35015	0.211	-0.1489	0.05	0.01096
YGL138C	YGL138C		1.05785	0.058	1.10984	0.013	-0.04891	0.057	4e-05
YGL139W	FLC3		0.98864	0.062	1.01589	0.028	-0.01338	0.062	7e-05
YGL140C	YGL140C		0.90618	0.179	1.02507	0.052	-0.1307	0.179	0.00205
YGL141W	HUL5		1.01856	0.004	1.01381	0.044	0.00662	0.004	0	status=JK
YGL144C	ROG1		1.05254	0.03	1.10171	0.01	-0.04709	0.03	1e-05
YGL146C	RRT6		0.9864	0.141	1.02764	0.051	-0.04001	0.141	0.00079
YGL147C	RPL9A		0.84076	0.055	0.95776	0.021	-0.1192	0.055	8e-05
YGL148W	ARO2		0.8603	0.012	0.83283	0.008	0.03296	0.012	6e-05	status=JK
YGL149W	YGL149W		0.85889	0.033	0.93925	0.04	-0.0865	0.033	2e-05
YGL151W	NUT1		0.83596	0.048	0.84258	0.097	-0.02038	0.048	5e-05
YGL152C	YGL152C		1.01415	0.017	1.02846	0.044	-0.00619	0.017	0
YGL153W	PEX14		0.94721	0.064	0.92479	0.035	0.0223	0.063	8e-05
YGL154C	LYS5		0.64033	0.028	0.63147	0.027	0.01358	0.027	2e-05
YGL156W	AMS1		0.99196	0.011	1.04002	0.04	-0.04322	0.011	4e-05	status=JK
YGL157W	ARI1		1.02214	0.101	1.05249	0.005	-0.02808	0.101	0.00026
YGL158W	RCK1		1.05377	0.022	1.00355	0.062	0.04234	0.022	0
YGL159W	YGL159W		1.07016	0.059	1.01639	0.099	0.04298	0.059	5e-05
YGL160W	AIM14		1.03072	0.036	0.98836	0.028	0.04413	0.036	1e-05
YGL161C	YIP5		1.0406	0.011	1.02896	0.051	0.00558	0.011	4e-05	status=JK
YGL162W	SUT1		1.0232	0.021	1.04951	0.025	-0.0307	0.02	0
YGL163C	RAD54		0.92321	0.024	0.97185	0.018	-0.03712	0.024	1e-05
YGL164C	YRB30		1.06302	0.054	1.15468	0.02	-0.0808	0.054	4e-05
YGL165C	YGL165C		1.06509	0.022	1.13795	0.005	-0.06883	0.022	0
YGL166W	CUP2		1.06728	0.008	1.1257	0.009	-0.06014	0.008	2e-05	status=JK
YGL167C	PMR1		0.73753	0.023	0.80931	0.016	-0.07464	0.023	1e-05
YGL168W	HUR1		0.66352	0.065	0.71895	0.013	-0.04797	0.065	0.00025
YGL170C	SPO74		0.9786	0.07	1.00275	0.065	-0.03119	0.07	0.0001
YGL173C	XRN1		0.55175	0.019	0.59812	0.057	-0.05515	0.019	0.0004	status=JK
YGL174W	BUD13		0.75183	0.056	0.73673	0.033	0.00031	0.056	0.00011
YGL175C	SAE2		0.92878	0.043	0.88605	0.079	0.05703	0.043	3e-05
YGL176C	YGL176C		1.12259	0.056	1.13372	0.044	-0.00761	0.056	3e-05
YGL177W	YGL177W		1.17303	0.023	1.18596	0.033	-0.02152	0.023	0
YGL179C	TOS3		1.16604	0.043	1.14713	0.107	-0.02324	0.043	1e-05
YGL180W	ATG1		0.96555	0.052	0.83918	0.029	0.13949	0.052	4e-05
YGL181W	GTS1		1.01899	0.017	0.94485	0.106	0.04912	0.017	0
YGL194C	HOS2		0.63014	0.083	0.62434	0.055	0.01387	0.083	0.00063
YGL195W	GCN1		0.89369	0.045	0.90477	0.07	-0.0041	0.045	4e-05
YGL196W	DSD1		0.9578	0.012	1.07412	0.084	-0.1081	0.012	5e-05	status=JK
YGL197W	MDS3		0.89665	0.029	0.89527	0.024	0.00645	0.029	1e-05
YGL198W	YIP4		0.99951	0.085	1.1522	0.023	-0.15217	0.085	0.00017
YGL199C	YGL199C		1.02278	0.019	0.99489	0.037	0.01173	0.019	0.00011	status=JK
YGL202W	ARO8		0.9791	0.018	1.01245	0.05	-0.0218	0.018	0.00011	status=JK
YGL203C	KEX1		1.00684	0.026	0.98456	0.042	0.04727	0.026	0
YGL205W	POX1		0.97226	0.023	0.99071	0.059	-0.03514	0.023	0
YGL208W	SIP2		1.00317	0.032	1.05776	0.037	-0.05302	0.032	1e-05
YGL209W	MIG2		1.01418	0.035	1.04821	0.024	-0.03442	0.035	1e-05
YGL210W	YPT32		1.01503	0.028	1.01274	0.029	-0.00062	0.028	1e-05
YGL211W	NCS6		0.94783	0.048	0.95446	0.018	-0.00244	0.048	4e-05
YGL212W	VAM7		0.81962	0.007	0.82162	0.025	-0.00067	0.007	2e-05	status=JK
YGL213C	SKI8		0.9462	0.002	0.97734	0.032	-0.02371	0.002	0	status=JK
YGL214W	YGL214W		0.24512	0.135	0.38061	0.028	-0.13149	0.135	0.03597
YGL215W	CLG1		0.95274	0.006	0.92559	0.023	0.02937	0.006	0
YGL216W	KIP3		1.01645	0.031	1.00781	0.08	-0.01026	0.031	1e-05
YGL217C	YGL217C		0.96235	0.025	0.97811	0.035	-0.02358	0.025	1e-05
YGL218W	YGL218W		0.68405	0.005	0.66823	0.1	0.01478	0.005	2e-05	status=JK
YGL219C	MDM34		0.91355	0.011	0.79662	0.035	0.12033	0.011	4e-05	status=JK
YGL221C	NIF3		0.97652	0.036	0.97995	0.003	-0.00139	0.036	1e-05
YGL222C	EDC1		0.97881	0.016	1.08028	0.004	-0.09772	0.016	9e-05	status=JK
YGL224C	SDT1		1.04116	0.044	1.07497	0.026	-0.02511	0.044	2e-05
YGL226C-A	OST5		1.05794	0.017	1.07023	0.034	-0.00337	0.017	0
YGL226W	MTC3		0.89264	0.022	0.81493	0.064	0.08993	0.022	0.0002	status=JK
YGL227W	VID30		0.99071	0.066	1.01797	0.045	-0.0361	0.066	8e-05
YGL228W	SHE10		0.99953	0.023	1.0634	0.027	-0.06468	0.023	0
YGL229C	SAP4		1.02717	0.045	1.05017	0.081	-0.02032	0.045	2e-05
YGL230C	YGL230C		0.99177	0.032	1.00518	0.009	-0.01449	0.032	1e-05
YGL231C	EMC4		1.04298	0.041	1.04773	0.007	-0.00619	0.041	2e-05
YGL232W	TAN1		1.10636	0.067	1.09348	0.047	0.02627	0.067	6e-05
YGL234W	ADE5		1.04501	0.013	1.02887	0.029	0.0215	0.013	0
YGL235W	YGL235W		0.80577	0.011	0.80577	0.019	-0.00739	0.011	6e-05	status=JK
YGL236C	MTO1		0.79475	0.087	0.79401	0.066	-0.00802	0.087	0.00036
YGL237C	HAP2		0.78861	0.1	0.79657	0.068	-0.00699	0.1	0.00056
YGL241W	KAP114		1.05571	0.047	1.04324	0.034	0.01129	0.047	2e-05
YGL242C	YGL242C		1.01822	0.022	1.02977	0.018	-0.009	0.021	0
YGL243W	TAD1		1.02225	0.017	1.02188	0.025	-0.00108	0.017	9e-05	status=JK
YGL244W	RTF1		0.65931	0.024	0.71043	0.061	-0.06472	0.024	1e-05
YGL248W	PDE1		1.02595	0.024	1.02116	0.047	1e-05	0.024	0
YGL249W	ZIP2		1.04524	0.024	1.02361	0.024	0.02568	0.024	0
YGL250W	RMR1		1.00144	0.024	1.0256	0.012	-0.01821	0.024	0
YGL251C	HFM1		1.05085	0.052	1.09958	0.069	-0.04694	0.052	3e-05
YGL252C	RTG2		0.63569	0.022	0.62429	0.049	0.0099	0.022	1e-05
YGL253W	HXK2		0.92051	0.082	0.92252	0.058	-0.00052	0.082	0.0002
YGL254W	FZF1		1.06364	0.031	1.02734	0.066	0.0625	0.031	0.00029	status=JK
YGL255W	ZRT1		0.96503	0.022	0.91375	0.038	0.06068	0.022	0
YGL256W	ADH4		1.04053	0.058	1.0736	0.041	-0.0417	0.058	5e-05
YGL257C	MNT2		1.03483	0.04	1.06227	0.062	-0.03902	0.04	2e-05
YGL258W	VEL1		1.01475	0.008	1.02739	0.031	-0.01386	0.008	2e-05	status=JK
YGL259W	YPS5		1.04606	0.053	1.08108	0.032	-0.03749	0.053	4e-05
YGL260W	YGL260W		1.02719	0.006	0.99239	0.025	0.03893	0.006	1e-05	status=JK
YGL261C	PAU11		1.00305	0.015	0.97844	0.05	0.03534	0.015	0
YGL262W	YGL262W		1.00276	0.031	0.99213	0.059	0.01324	0.031	1e-05
YGL263W	COS12		1.03619	0.042	1.00368	0.049	0.04057	0.042	2e-05
YGR001C	YGR001C		0.97438	0.103	0.95441	0.064	0.01228	0.102	0.00032
YGR003W	CUL3		0.99854	0.052	1.04203	0.024	-0.04716	0.052	4e-05
YGR004W	PEX31		0.98464	0.075	1.01722	0.014	-0.0292	0.075	0.00012
YGR007W	ECT1		1.02432	0.02	1.01919	0.012	0.00169	0.02	0.00013	status=JK
YGR008C	STF2		1.01832	0.037	1.02067	0.036	-0.00527	0.037	1e-05
YGR010W	NMA2		0.99519	0.073	1.00013	0.023	-0.01705	0.073	0.00011
YGR011W	YGR011W		1.03661	0.041	0.99319	0.036	0.05303	0.04	2e-05
YGR012W	YGR012W		1.01171	0.006	1.07177	0.069	-0.07602	0.006	1e-05	status=JK
YGR014W	MSB2		1.05122	0.021	1.01524	0.054	0.04388	0.021	0
YGR015C	YGR015C		1.00698	0.083	1.00656	0.06	-0.00147	0.083	0.00015
YGR016W	YGR016W		1.00599	0.039	1.04653	0.031	-0.04045	0.039	2e-05
YGR017W	YGR017W		0.89015	0.061	0.89106	0.05	-0.01061	0.06	9e-05
YGR018C	YGR018C		0.96908	0.012	0.95579	0.006	0.01746	0.012	5e-05	status=JK
YGR019W	UGA1		1.08457	0.089	1.07523	0.017	0.01246	0.089	0.00015
YGR021W	YGR021W		0.98246	0.086	1.0147	0.074	-0.04681	0.086	0.00018
YGR022C	YGR022C		1.03099	0.008	0.95759	0.041	0.07295	0.008	2e-05	status=JK
YGR023W	MTL1		1.10124	0.006	1.09642	0.037	0.01357	0.006	1e-05	status=JK
YGR025W	YGR025W		1.05137	0.054	1.06832	0.082	-0.02026	0.054	4e-05
YGR026W	YGR026W		0.99445	0.034	0.99424	0.021	0.00611	0.034	1e-05
YGR027C	RPS25A		0.79724	0.035	0.77585	0.065	0.00806	0.035	2e-05
YGR028W	MSP1		0.98152	0.039	0.95273	0.045	0.01806	0.039	2e-05
YGR031W	IMO32		0.99212	0.026	0.97839	0.022	0.00974	0.026	1e-05
YGR032W	GSC2		1.01068	0.071	0.98302	0.008	0.02826	0.071	0.0001
YGR033C	TIM21		1.04577	0.069	1.07317	0.078	-0.01091	0.069	8e-05
YGR034W	RPL26B		0.94148	0.032	1.05783	0.022	-0.10629	0.032	1e-05
YGR035C	YGR035C		0.98011	0.034	0.99047	0.012	-0.00301	0.034	1e-05
YGR037C	ACB1		0.90895	0.029	0.87934	0.004	0.03269	0.029	1e-05
YGR038W	ORM1		0.98538	0.031	0.90315	0.08	0.1029	0.031	1e-05
YGR039W	YGR039W		1.00201	0.038	1.02128	0.042	-0.00343	0.038	2e-05
YGR040W	KSS1		0.98153	0.019	1.00919	0.049	-0.02224	0.019	0
YGR041W	BUD9		0.98405	0.012	1.01422	0.08	-0.03339	0.012	0
YGR042W	YGR042W		1.02662	0.023	1.07651	0.035	-0.04603	0.023	0
YGR043C	NQM1		1.05339	0.052	1.08638	0.006	-0.03309	0.052	3e-05
YGR044C	RME1		1.10786	0.06	1.09284	0.047	0.0283	0.06	4e-05
YGR045C	YGR045C		1.09993	0.026	1.04459	0.026	0.05755	0.026	0
YGR049W	SCM4		0.92175	0.024	0.92971	0.116	0.00827	0.024	0.00023	status=JK
YGR050C	YGR050C		1.06599	0.022	1.0442	0.009	0.02214	0.022	0
YGR051C	YGR051C		1.12661	0.061	1.14536	0.011	-0.01401	0.061	4e-05
YGR052W	FMP48		1.04548	0.051	1.05873	0.057	-0.00865	0.051	3e-05
YGR053C	YGR053C		1.0193	0.02	1.00658	0.056	0.0092	0.02	0
YGR054W	YGR054W		1.06981	0.039	1.04661	0.053	0.02863	0.039	1e-05
YGR055W	MUP1		1.05962	0.023	1.0322	0.066	0.01563	0.023	0
YGR058W	PEF1		1.02343	0.049	0.98773	0.021	0.04057	0.049	3e-05
YGR059W	SPR3		0.96311	0.036	0.93257	0.068	0.03697	0.036	1e-05
YGR061C	ADE6		0.91333	0.034	0.87604	0.209	0.00074	0.034	0.00046	status=JK
YGR066C	YGR066C		1.04883	0.002	1.06259	0.043	-0.01363	0.002	0	status=JK
YGR067C	YGR067C		1.0149	0.036	1.04423	0.002	-0.02969	0.036	1e-05
YGR068C	ART5		1.04225	0.021	1.01568	0.037	0.03326	0.021	0.00013	status=JK
YGR069W	YGR069W		1.06458	0.012	1.02773	0.06	0.05447	0.012	4e-05	status=JK
YGR070W	ROM1		1.01865	0.105	1.0322	0.041	-0.00903	0.104	0.0003
YGR071C	ENV11		1.05806	0.017	0.95702	0.033	0.0967	0.017	9e-05	status=JK
YGR072W	UPF3		0.93254	0.035	0.91411	0.071	0.0312	0.035	1e-05
YGR077C	PEX8		0.86678	0.009	0.81749	0.036	0.05596	0.009	0
YGR078C	PAC10		0.84603	0.057	0.71935	0.157	0.10925	0.057	8e-05
YGR079W	YGR079W		1.02805	0.036	1.04058	0.059	-0.02868	0.036	1e-05
YGR080W	TWF1		1.02427	0.018	1.07445	0.006	-0.04753	0.018	0
YGR081C	SLX9		0.70309	0.012	0.7349	0.01	-0.03622	0.012	9e-05	status=JK
YGR084C	MRP13		0.9972	0.035	0.98456	0.021	0.02559	0.034	1e-05
YGR085C	RPL11B		0.81257	0.024	0.85267	0.011	-0.03766	0.024	1e-05
YGR086C	PIL1		1.08547	0.023	1.03729	0.007	0.0529	0.023	0.00015	status=JK
YGR087C	PDC6		0.96652	0.045	1.02476	0.027	-0.05801	0.045	3e-05
YGR088W	CTT1		1.07813	0.076	1.05641	0.017	0.01432	0.076	0.0001
YGR089W	NNF2		1.02357	0.015	1.02037	0.074	0.01033	0.015	7e-05	status=JK
YGR092W	DBF2		0.70189	0.075	0.60196	0.021	0.0909	0.075	0.00033
YGR093W	YGR093W		1.00193	0.011	0.968	0.085	0.04716	0.011	4e-05	status=JK
YGR096W	TPC1		0.99457	0.037	0.97579	0.066	0.02941	0.037	1e-05
YGR097W	ASK10		0.83879	0.035	0.7789	0.098	0.07667	0.035	2e-05
YGR100W	MDR1		1.00759	0.031	1.03241	0.054	-0.02714	0.031	1e-05
YGR101W	PCP1		0.77551	0.046	0.78625	0.037	-0.01514	0.046	6e-05
YGR105W	VMA21		0.60063	0.01	0.59948	0.004	0.00117	0.01	0.0001	status=JK
YGR106C	VOA1		1.00093	0.057	0.99691	0.076	-0.00733	0.056	5e-05
YGR107W	YGR107W		1.00049	0.077	1.00131	0.021	0.00093	0.077	0.00012
YGR108W	CLB1		0.99011	0.074	1.05369	0.014	-0.0649	0.074	0.00012
YGR109C	CLB6		1.03477	0.004	0.97704	0.039	0.06492	0.004	1e-05	status=JK
YGR110W	CLD1		1.01285	0.012	1.05645	0.047	-0.03836	0.012	5e-05	status=JK
YGR111W	YGR111W		0.91448	0.087	1.02686	0.038	-0.11578	0.087	0.00024
YGR117C	YGR117C		1.0151	0.01	1.01615	0.031	-0.00352	0.01	0
YGR118W	RPS23A		0.82912	0.061	0.81004	0.048	0.00461	0.061	0.00011
YGR121C	MEP1		0.98959	0.032	0.97872	0.026	0.01141	0.032	1e-05
YGR122C-A	YGR122C-A		1.05911	0.05	1.10808	0.01	-0.04417	0.05	3e-05
YGR122W	YGR122W		0.82751	0.076	0.90553	0.034	-0.07849	0.076	0.00022
YGR123C	PPT1		1.08799	0.09	1.08011	0.057	0.01982	0.089	0.00015
YGR124W	ASN2		1.00598	0.05	0.95505	0.006	0.04976	0.05	3e-05
YGR125W	YGR125W		0.8589	0.149	0.9122	0.08	-0.07048	0.149	0.0014
YGR126W	YGR126W		0.98766	0.011	1.04177	0.031	-0.05156	0.011	4e-05	status=JK
YGR127W	YGR127W		0.92366	0.161	1.0777	0.009	-0.15019	0.16	0.00141
YGR129W	SYF2		1.01217	0.022	0.94449	0.054	0.07241	0.022	0
YGR130C	YGR130C		0.99165	0.02	1.02591	0.006	-0.02952	0.02	0
YGR131W	FHN1		1.04473	0.027	1.0817	0.08	-0.04474	0.027	0
YGR132C	PHB1		0.94156	0.03	0.9097	0.003	0.03213	0.03	1e-05
YGR133W	PEX4		0.93298	0.017	0.98122	0.02	-0.04638	0.017	0
YGR134W	CAF130		1.00561	0.005	1.00667	0.012	0.00226	0.005	0
YGR135W	PRE9		0.94247	0.049	0.93828	0.008	0.00495	0.049	4e-05
YGR136W	LSB1		1.02519	0.024	0.99357	0.007	0.03399	0.024	0
YGR137W	YGR137W		1.04041	0.085	1.01372	0.014	0.02441	0.084	0.00015
YGR138C	TPO2		0.98073	0.03	1.03255	0.079	-0.06698	0.029	1e-05
YGR139W	YGR139W		1.09574	0.053	1.07329	0.112	0.03833	0.053	3e-05
YGR141W	VPS62		0.99456	0.04	0.98097	0.035	0.01684	0.04	2e-05
YGR142W	BTN2		1.01856	0.015	0.92667	0.039	0.08039	0.015	7e-05	status=JK
YGR143W	SKN1		0.98144	0.024	1.05812	0.041	-0.06741	0.024	0
YGR144W	THI4		1.06108	0.012	1.08185	0.054	-0.02178	0.012	5e-05	status=JK
YGR146C	ECL1		1.11204	0.027	1.11595	0.033	-0.01007	0.027	0
YGR148C	RPL24B		0.80959	0.03	0.81182	0.031	-0.00359	0.03	1e-05
YGR149W	YGR149W		1.0387	0.013	1.05465	0.043	-0.01688	0.013	6e-05	status=JK
YGR151C	YGR151C		1.07447	0.033	1.14293	0.015	-0.06904	0.033	1e-05
YGR152C	RSR1		0.94137	0.135	0.95782	0.16	-0.01924	0.135	0.00079
YGR153W	YGR153W		0.99582	0.056	0.90933	0.014	0.08772	0.056	5e-05
YGR154C	GTO1		1.04644	0.014	1.01522	0.009	0.03047	0.014	6e-05	status=JK
YGR157W	CHO2		0.61549	0.059	0.4937	0.03	0.12694	0.058	0.00024
YGR161C	RTS3		1.04779	0.082	0.98914	0.09	0.03829	0.082	0.00013
YGR163W	GTR2		0.88771	0.034	0.72123	0.045	0.18631	0.034	2e-05
YGR164W	YGR164W		1.03815	0.041	1.02687	0.118	-0.02282	0.041	2e-05
YGR166W	TRS65		0.90218	0.052	0.95658	0.092	-0.05491	0.052	5e-05
YGR168C	YGR168C		0.95099	0.043	0.93282	0.073	0.01147	0.043	3e-05
YGR169C	PUS6		1.00365	0.011	1.01641	0.003	-0.01179	0.011	4e-05	status=JK
YGR170W	PSD2		0.98819	0.027	1.03056	0.024	-0.04171	0.027	1e-05
YGR173W	RBG2		0.98936	0.026	0.99976	0.039	-0.00655	0.026	0
YGR174C	CBP4		0.82477	0.038	0.8292	0.057	-0.01599	0.038	3e-05
YGR176W	YGR176W		1.11053	0.004	1.08836	0.018	0.01972	0.004	0	status=JK
YGR177C	ATF2		1.10563	0.053	1.05953	0.04	0.04544	0.053	3e-05
YGR178C	PBP1		1.0478	0.029	1.03789	0.023	0.01325	0.029	1e-05
YGR181W	TIM13		0.98817	0.07	1.02662	0.158	-0.0402	0.07	0.0001
YGR182C	YGR182C		0.92821	0.053	0.85777	0.106	0.07443	0.053	5e-05
YGR183C	QCR9		0.90399	0.018	0.80907	0.108	0.07835	0.018	0.00013	status=JK
YGR184C	UBR1		1.02917	0.041	0.98833	0.047	0.05113	0.041	2e-05
YGR187C	HGH1		0.96589	0.046	0.94869	0.054	0.02763	0.046	3e-05
YGR188C	BUB1		0.62304	0.037	0.64547	0.006	-0.02247	0.037	6e-05
YGR189C	CRH1		1.12137	0.046	1.07432	0.032	0.05365	0.046	2e-05
YGR192C	TDH3		0.93266	0.066	1.00774	0.054	-0.08477	0.066	0.0001
YGR193C	PDX1		1.0301	0.054	0.96799	0.014	0.06159	0.054	4e-05
YGR194C	XKS1		1.01189	0.058	1.0164	0.015	-0.00476	0.058	5e-05
YGR196C	FYV8		0.99546	0.025	1.02382	0.032	-0.02254	0.025	0
YGR197C	SNG1		1.10363	0.059	1.11281	0.102	-0.02021	0.059	4e-05
YGR199W	PMT6		1.17062	0.079	1.15389	0.09	0.00435	0.079	8e-05
YGR200C	ELP2		0.84101	0.011	0.86589	0.007	-0.0251	0.011	0
YGR201C	YGR201C		1.12944	0.033	1.1194	0.034	0.01627	0.033	1e-05
YGR202C	PCT1		1.09804	0.022	1.088	0.029	0.01846	0.022	0
YGR203W	YCH1		0.99905	0.012	0.99022	0.029	0.00253	0.012	5e-05	status=JK
YGR205W	TDA10		1.04514	0.012	1.03799	0.008	0.00641	0.012	0
YGR206W	MVB12		0.95774	0.049	0.92356	0.045	0.02767	0.049	4e-05
YGR207C	CIR1		1.10172	0.105	1.094	0.044	-0.00104	0.105	0.00024
YGR208W	SER2		1.02357	0.012	1.07199	0.04	-0.05173	0.012	5e-05	status=JK
YGR209C	TRX2		1.01742	0.049	1.01801	0.012	0.00488	0.049	3e-05
YGR210C	YGR210C		1.05182	0.009	1.11994	0.096	-0.0726	0.009	3e-05	status=JK
YGR212W	SLI1		1.12311	0.05	0.98066	0.041	0.16055	0.05	2e-05
YGR213C	RTA1		1.08145	0.056	1.06739	0.053	0.0212	0.055	4e-05
YGR214W	RPS0A		0.85253	0.014	0.89513	0.007	-0.03953	0.014	8e-05	status=JK
YGR217W	CCH1		0.98635	0.065	1.00956	0.059	-0.03743	0.065	8e-05
YGR221C	TOS2		0.93537	0.081	0.97101	0.032	-0.03552	0.081	0.00018
YGR223C	HSV2		0.87174	0.007	0.87881	0.006	-0.00544	0.007	2e-05	status=JK
YGR224W	AZR1		1.04386	0.031	1.09273	0.014	-0.0506	0.031	1e-05
YGR225W	AMA1		0.99764	0.025	0.9956	0.011	0.00395	0.025	0.00021	status=JK
YGR226C	YGR226C		1.01628	0.039	0.99732	0.044	0.00778	0.039	2e-05
YGR227W	DIE2		1.00477	0.028	1.05304	0.012	-0.05245	0.028	1e-05
YGR228W	YGR228W		0.88554	0.016	1.01869	0.117	-0.13322	0.016	0
YGR229C	SMI1		0.79662	0.026	0.91458	0.069	-0.10669	0.026	0.00036	status=JK
YGR230W	BNS1		1.17184	0.052	1.15952	0.036	0.01883	0.052	2e-05
YGR231C	PHB2		0.76924	0.046	0.68714	0.034	0.09126	0.046	6e-05
YGR232W	NAS6		1.05198	0.031	1.04781	0.039	0.01341	0.031	1e-05
YGR233C	PHO81		0.96939	0.038	1.00377	0.044	-0.03409	0.038	2e-05
YGR234W	YHB1		1.1796	0.03	1.11886	0.082	0.07928	0.03	0.00021	status=JK
YGR235C	MOS2		1.07534	0.043	1.11035	0.026	-0.02047	0.043	2e-05
YGR236C	SPG1		0.97751	0.06	1.00702	0.026	-0.02972	0.06	6e-05
YGR237C	YGR237C		1.06969	0.044	0.99327	0.094	0.07144	0.044	2e-05
YGR238C	KEL2		0.98342	0.122	1.00346	0.006	-0.02025	0.122	0.00052
YGR239C	PEX21		0.93511	0.053	0.97056	0.027	-0.02795	0.053	5e-05
YGR241C	YAP1802		0.99486	0.091	1.02203	0.012	-0.02756	0.091	0.00021
YGR242W	YGR242W		1.04607	0.009	1.02551	0.017	0.02651	0.009	2e-05	status=JK
YGR243W	FMP43		1.06695	0.041	1.10233	0.006	-0.03794	0.041	2e-05
YGR244C	LSC2		1.08193	0.074	1.098	0.072	-0.01519	0.074	9e-05
YGR247W	CPD1		1.00804	0.084	1.00675	0.105	0.01526	0.084	0.00016
YGR248W	SOL4		0.99964	0.051	1.02178	0.063	-0.01135	0.051	4e-05
YGR249W	MGA1		1.13307	0.079	1.1195	0.079	0.00872	0.079	9e-05
YGR250C	YGR250C		0.91662	0.054	0.92027	0.055	-0.00061	0.054	6e-05
YGR254W	ENO1		1.02992	0.027	1.04441	0.013	-0.01685	0.027	0.00023	status=JK
YGR255C	COQ6		0.99319	0.055	1.02564	0.004	-0.03036	0.055	5e-05
YGR256W	GND2		0.93232	0.171	1.0414	0.087	-0.10704	0.171	0.00166
YGR259C	YGR259C		0.99562	0.112	0.97863	0.014	0.01024	0.112	0.00039
YGR260W	TNA1		0.98596	0.117	0.94833	0.07	0.04652	0.117	0.00046
YGR261C	APL6		0.99934	0.025	1.11629	0.051	-0.11415	0.025	0
YGR263C	SAY1		1.07864	0.026	1.08165	0.08	0.00054	0.026	0
YGR266W	YGR266W		0.94644	0.016	0.95686	0.043	0.00072	0.016	0
YGR268C	HUA1		1.10752	0.017	0.44014	0.518	0.72713	0.017	8e-05	status=JK
YGR269W	YGR269W		1.01758	0.031	0.76524	0.382	0.21183	0.031	1e-05
YGR270W	YTA7		0.86165	0.053	0.82184	0.083	0.05786	0.052	6e-05
YGR271W	SLH1		1.00518	0.039	0.90976	0.18	0.05699	0.039	2e-05
YGR272C	YGR272C		1.01245	0.045	1.02327	0.003	-0.01002	0.045	2e-05
YGR273C	YGR273C		1.03958	0.031	1.08733	0.009	-0.04996	0.031	1e-05
YGR275W	RTT102		0.91708	0.131	0.90231	0.159	0.01247	0.131	0.00079
YGR276C	RNH70		1.01429	0.01	1.09819	0.034	-0.09154	0.01	3e-05	status=JK
YGR279C	SCW4		0.79221	0.142	0.84842	0.033	-0.05773	0.142	0.00154
YGR281W	YOR1		1.03413	0.069	1.08025	0.056	-0.02064	0.068	8e-05
YGR282C	BGL2		1.02706	0.1	1.08315	0.133	-0.05195	0.1	0.00025
YGR283C	YGR283C		0.96748	0.043	0.99153	0.094	-0.04657	0.043	2e-05
YGR284C	ERV29		1.07717	0.011	0.96173	0.15	0.12098	0.011	4e-05	status=JK
YGR286C	BIO2		0.93898	0.07	0.9898	0.037	-0.04867	0.07	0.00012
YGR287C	IMA1		0.98131	0.065	0.9907	0.085	-0.02194	0.065	8e-05
YGR288W	MAL13		1.01336	0.038	0.99401	0.033	0.02086	0.038	1e-05
YGR289C	MAL11		1.02823	0.015	0.97012	0.006	0.05776	0.015	7e-05	status=JK
YGR290W	YGR290W		1.12594	0.048	1.11886	0.036	0.01069	0.048	2e-05
YGR291C	YGR291C		1.05021	0.005	1.0888	0.051	-0.03794	0.005	1e-05	status=JK
YGR292W	MAL12		1.09116	0.031	1.03426	0.036	0.05606	0.031	1e-05
YGR295C	COS6		0.96263	0.037	0.97592	0.032	-0.00758	0.037	2e-05
YHL002W	HSE1		1.02413	0.006	1.02109	0.035	0.00738	0.006	1e-05	status=JK
YHL003C	LAG1		1.00656	0.107	1.04051	0.089	-0.01298	0.107	0.00033
YHL005C	YHL005C		0.68449	0.047	0.79817	0.012	-0.10853	0.047	9e-05
YHL006C	SHU1		0.99391	0.042	0.98014	0.014	0.00736	0.042	2e-05
YHL007C	STE20		0.43192	0.306	0	0	0.43111	0.306	0.06676
YHL008C	YHL008C		1.01776	0.011	1.01496	0.208	0.0059	0.011	4e-05	status=JK
YHL009C	YAP3		1.02414	0.062	1.02573	0.052	-0.01379	0.061	6e-05
YHL010C	ETP1		1.04153	0.08	1.01164	0.029	0.03195	0.079	0.00012
YHL012W	YHL012W		1.02327	0.035	1.05237	0.043	-0.01517	0.035	1e-05
YHL013C	OTU2		1.01934	0.071	0.97758	0.019	0.04843	0.071	9e-05
YHL014C	YLF2		1.07268	0.02	1.06924	0.052	0.00331	0.019	0
YHL016C	DUR3		0.98067	0.15	1.01337	0.053	-0.04504	0.15	0.00097
YHL017W	YHL017W		1.01597	0.093	1.02228	0.019	-0.00615	0.093	0.00021
YHL019C	APM2		1.02645	0.012	0.99667	0.016	0.0264	0.012	4e-05	status=JK
YHL020C	OPI1		0.61303	0.021	0.60951	0.072	0.00613	0.021	0.00039	status=JK
YHL021C	AIM17		0.96404	0.066	0.96086	0.104	0.00146	0.066	9e-05
YHL022C	SPO11		1.06459	0.057	1.12376	0.089	-0.07947	0.057	4e-05
YHL023C	NPR3		0.86137	0.02	0.84637	0.012	0.0141	0.02	0
YHL024W	RIM4		1.06041	0.044	1.05306	0.017	0.00561	0.043	2e-05
YHL025W	SNF6		0.85446	0.013	0.87672	0.014	-0.01798	0.013	8e-05	status=JK
YHL026C	YHL026C		0.92374	0.104	0.981	0.027	-0.05255	0.103	0.00038
YHL027W	RIM101		0.75479	0.037	0.79185	0.074	-0.04113	0.037	3e-05
YHL028W	WSC4		0.98076	0.062	1.00013	0.029	-0.02424	0.062	7e-05
YHL029C	OCA5		0.83572	0.139	0.87674	0.027	-0.03541	0.139	0.00124
YHL030W	ECM29		0.96711	0.063	1.00442	0.019	-0.03324	0.063	8e-05
YHL031C	GOS1		0.66642	0.086	0.68368	0.012	-0.01747	0.085	0.00058
YHL032C	GUT1		0.94806	0.039	1.06205	0.103	-0.11904	0.038	2e-05
YHL033C	RPL8A		0.68232	0.017	0.75495	0.115	-0.06496	0.017	0
YHL034C	SBP1		0.93808	0.008	0.97168	0.037	-0.02846	0.008	3e-05	status=JK
YHL035C	VMR1		0.98061	0.052	0.99758	0.02	-0.01189	0.052	4e-05
YHL036W	MUP3		1.06398	0.051	1.02044	0.003	0.04231	0.051	3e-05
YHL037C	YHL037C		0.99334	0.056	0.90318	0.102	0.08771	0.056	5e-05
YHL039W	EFM1		1.05318	0.048	1.01228	0.135	0.06952	0.048	3e-05
YHL040C	ARN1		1.02664	0.07	1.0172	0.042	0.01541	0.07	9e-05
YHL041W	YHL041W		0.9762	0.111	1.04316	0.02	-0.06834	0.111	0.0004
YHL042W	YHL042W		0.99691	0.051	1.01994	0.011	-0.02863	0.051	4e-05
YHL043W	ECM34		0.98729	0.034	1.00967	0.015	-0.01794	0.034	1e-05
YHL044W	YHL044W		1.0305	0.018	0.92081	0.041	0.08799	0.018	0.0001	status=JK
YHL045W	YHL045W		1.0226	0.075	1.03656	0.112	-0.00208	0.075	0.00011
YHL046C	PAU13		1.09087	0.02	1.03806	0.07	0.07285	0.02	0
YHL047C	ARN2		1.0486	0.049	1.01546	0.007	0.03755	0.049	3e-05
YHR001W-A	QCR10		0.99879	0.062	1.03158	0.016	-0.02958	0.062	7e-05
YHR003C	YHR003C		0.8877	0.03	0.92886	0.001	-0.04047	0.03	1e-05
YHR004C	NEM1		0.9962	0.083	0.95442	0.013	0.04745	0.083	0.00016
YHR005C	GPA1		0	0	0	0	0	0	#NUM!
YHR006W	STP2		1.03943	0.029	1.021	0.04	0.01115	0.029	1e-05
YHR008C	SOD2		0.95943	0.062	0.94976	0.051	0.00745	0.062	8e-05
YHR009C	TDA3		0.96597	0.036	0.90707	0.074	0.07535	0.036	0.00046	status=JK
YHR012W	VPS29		0.72748	0.032	0.84487	0.045	-0.11682	0.032	2e-05
YHR014W	SPO13		0.91494	0.064	0.89222	0.07	0.03336	0.064	9e-05
YHR015W	MIP6		1.02119	0.036	1.07001	0.03	-0.05183	0.035	1e-05
YHR016C	YSC84		1.14566	0.019	1.12961	0.024	0.00505	0.019	0.0001	status=JK
YHR017W	YSC83		0.8419	0.022	0.83308	0.074	0.02676	0.022	0.00023	status=JK
YHR018C	ARG4		0.52565	0.017	0.50472	0.077	0.00543	0.017	0.00036	status=JK
YHR021C	RPS27B		0.6486	0.035	0.82274	0.033	-0.1783	0.035	4e-05
YHR021W-A	ECM12		1.10116	0.05	0.99013	0.227	0.10294	0.05	0.0007	status=JK
YHR022C	YHR022C		0.97162	0.087	0.87984	0.162	0.12018	0.087	0.00019
YHR025W	THR1		0.59512	0.071	0.62334	0.024	-0.02537	0.071	0.00046
YHR028C	DAP2		0.99737	0.015	0.95725	0.04	0.04265	0.015	8e-05	status=JK
YHR029C	YHI9		0.99708	0.031	1.00524	0.04	-0.01733	0.031	1e-05
YHR030C	SLT2		1.05948	0.032	1.04564	0.036	0.00777	0.032	1e-05
YHR031C	RRM3		1.09227	0.071	1.0771	0.119	0.01769	0.071	8e-05
YHR032W	ERC1		1.06919	0.038	1.10613	0.033	-0.03265	0.038	1e-05
YHR033W	YHR033W		0.99071	0.038	0.99062	0.03	-0.00879	0.038	2e-05
YHR034C	PIH1		0.88053	0.071	1.01057	0.072	-0.13585	0.071	0.00015
YHR035W	YHR035W		1.07634	0.042	0.96702	0.206	0.13198	0.042	2e-05
YHR037W	PUT2		1.00919	0.007	0.88416	0.256	0.12766	0.007	2e-05	status=JK
YHR039C	MSC7		0.93774	0.05	1.02662	0.113	-0.09347	0.05	4e-05
YHR041C	SRB2		0.39727	0.004	0.53356	0.03	-0.14894	0.004	0
YHR043C	DOG2		0.99731	0.009	1.0717	0.154	-0.11471	0.009	3e-05	status=JK
YHR044C	DOG1		0.94897	0.067	0.96176	0.058	0.00613	0.067	0.0001
YHR045W	YHR045W		0.98311	0.021	0.9181	0.107	0.0625	0.021	0
YHR046C	INM1		0.95089	0.049	0.86668	0.183	0.12945	0.049	4e-05
YHR047C	AAP1		0.97711	0.015	1.022	0.08	-0.02646	0.015	8e-05	status=JK
YHR048W	YHK8		0.89412	0.058	0.92064	0.048	-0.03691	0.058	8e-05
YHR049C-A	YHR049C-A		1.07197	0.013	1.10073	0.013	-0.02526	0.013	0
YHR049W	FSH1		1.05936	0.083	1.02032	0.029	0.04204	0.083	0.00013
YHR050W	SMF2		0.99385	0.084	0.99697	0.035	-0.00275	0.084	0.00017
YHR057C	CPR2		0.95449	0.181	1.00894	0.085	-0.04384	0.18	0.00181
YHR059W	FYV4		0	0	0.05184	0.061	-0.04319	0	#NUM!
YHR061C	GIC1		0.29726	0.049	0.33215	0.129	-0.02838	0.049	0.00907	status=JK
YHR066W	SSF1		0.82101	0.042	0.84431	0.012	-0.02933	0.041	4e-05
YHR067W	HTD2		0.70481	0.018	0.76668	0.005	-0.05968	0.018	0
YHR073W	OSH3		1.10228	0.043	1.14138	0.07	-0.02546	0.043	2e-05
YHR075C	PPE1		1.00203	0.015	0.98767	0.036	0.0139	0.015	7e-05	status=JK
YHR076W	PTC7		0.93008	0.042	0.95327	0.012	-0.0232	0.042	3e-05
YHR077C	NMD2		0.99595	0.054	0.96478	0.031	0.02451	0.054	4e-05
YHR078W	YHR078W		1.16649	0.044	1.15639	0.054	0.00678	0.044	1e-05
YHR079C	IRE1		1.06887	0.016	1.10759	0.056	-0.02959	0.016	0
YHR079C-B	YHR079C-B		1.07024	0.042	1.07888	0.036	0.00024	0.042	2e-05
YHR080C	YHR080C		1.01665	0.074	1.03693	0.017	-0.0215	0.074	0.00011
YHR081W	LRP1		0.68911	0.032	0.6702	0.025	0.024	0.032	0.0007	status=JK
YHR082C	KSP1		1.00237	0.008	1.03294	0.037	-0.03106	0.008	0
YHR086W	NAM8		1.09353	0.04	0.99633	0.068	0.10158	0.04	1e-05
YHR087W	RTC3		1.03078	0.018	0.95873	0.143	0.09042	0.018	0.0001	status=JK
YHR092C	HXT4		1.00647	0.049	1.01408	0.019	-0.00796	0.049	3e-05
YHR093W	YHR093W		1.0398	0.022	1.01268	0.026	0.02733	0.022	0
YHR094C	HXT1		1.06224	0.027	1.07915	0.021	-0.01917	0.027	0
YHR095W	YHR095W		1.06205	0.052	1.10484	0.004	-0.04407	0.052	3e-05
YHR096C	HXT5		0.94692	0.029	1.02205	0.048	-0.07603	0.029	0.00032	status=JK
YHR097C	YHR097C		0.94579	0.13	0.95965	0.047	-0.01341	0.13	0.00071
YHR103W	SBE22		0.97399	0.052	0.98526	0.051	-0.00632	0.052	4e-05
YHR104W	GRE3		0.99431	0.073	1.00588	0.042	-0.01099	0.072	0.00011
YHR105W	YPT35		0.93657	0.014	0.99375	0.002	-0.05603	0.014	8e-05	status=JK
YHR106W	TRR2		1.0485	0.074	1.05967	0.032	-0.01373	0.074	0.0001
YHR108W	GGA2		0.95488	0.079	0.98856	0.041	-0.02706	0.079	0.00016
YHR109W	CTM1		1.0258	0.072	0.98622	0.046	0.03154	0.072	0.0001
YHR110W	ERP5		1.08272	0.013	1.06977	0.077	0.00583	0.013	5e-05	status=JK
YHR111W	UBA4		0.9532	0.036	0.94353	0.016	0.01643	0.036	1e-05
YHR112C	YHR112C		0.96853	0.056	1.00356	0.023	-0.02157	0.056	5e-05
YHR113W	APE4		0.96211	0.065	0.95518	0.057	0.00216	0.065	8e-05
YHR114W	BZZ1		1.10317	0.173	1.1019	0.086	-0.00202	0.173	0.00104
YHR115C	DMA1		1.02847	0.027	0.98626	0.019	0.04746	0.027	0.00023	status=JK
YHR116W	COX23		0.75605	0.054	0.78383	0.037	-0.02242	0.054	0.0001
YHR117W	TOM71		0.95453	0.056	0.97368	0.028	-0.01113	0.056	6e-05
YHR121W	LSM12		1.03033	0.054	1.04594	0.1	-0.03466	0.054	4e-05
YHR123W	EPT1		1.01411	0.025	1.07583	0.035	-0.06919	0.025	0
YHR124W	NDT80		0.96761	0.011	1.01136	0.028	-0.0411	0.011	4e-05	status=JK
YHR125W	YHR125W		1.02621	0.02	1.02353	0.006	0.00322	0.02	0
YHR126C	ANS1		0.96635	0.102	0.9715	0.05	-0.01515	0.102	0.00032
YHR127W	YHR127W		0.97361	0.015	0.9747	0.01	-0.00347	0.015	8e-05	status=JK
YHR129C	ARP1		0.87514	0.107	0.89362	0.072	0.00298	0.107	0.00049
YHR130C	YHR130C		1.07266	0.023	1.07786	0.042	0.00317	0.023	0
YHR131C	YHR131C		0.98699	0.117	0.97998	0.005	0.0069	0.117	0.00045
YHR132C	ECM14		0.92734	0.122	1.02642	0.049	-0.10016	0.122	0.00062
YHR132W-A	IGO2		1.01419	0.041	0.9776	0.032	0.03792	0.041	2e-05
YHR133C	NSG1		1.01549	0.047	1.01257	0.016	0.00815	0.047	3e-05
YHR134W	WSS1		0.9279	0.042	0.93028	0.051	-0.00702	0.042	3e-05
YHR135C	YCK1		0.99822	0.033	1.0053	0.028	-0.0087	0.033	1e-05
YHR136C	SPL2		1.03866	0.01	1.05777	0.01	-0.02091	0.01	3e-05	status=JK
YHR137W	ARO9		1.14717	0.07	1.09578	0.074	0.07019	0.07	6e-05
YHR138C	YHR138C		1.137	0.076	1.10375	0.147	0.01683	0.076	8e-05
YHR139C	SPS100		1.04675	0.023	1.02331	0.071	0.01162	0.023	0
YHR139C-A	YHR139C-A		1.07312	0.071	1.09871	0.011	-0.02698	0.071	8e-05
YHR140W	YHR140W		1.10051	0.057	1.04427	0.003	0.0558	0.057	0.0009	status=JK
YHR142W	CHS7		1.05274	0.038	1.03134	0.076	0.00547	0.038	1e-05
YHR143W	DSE2		0.95007	0.01	0.88716	0.063	0.07876	0.01	3e-05	status=JK
YHR146W	CRP1		1.03674	0.012	1.07123	0.028	-0.0279	0.012	4e-05	status=JK
YHR150W	PEX28		1.07439	0.009	1.05426	0.092	0.01483	0.009	2e-05	status=JK
YHR151C	MTC6		1.01102	0.019	1.02267	0.051	-0.01195	0.019	0
YHR152W	SPO12		1.07595	0.035	1.10044	0.138	-0.04881	0.035	1e-05
YHR153C	SPO16		1.01442	0.097	0.64855	0.535	0.29857	0.097	0.00024
YHR154W	RTT107		0.9479	0.021	1.03608	0.063	-0.08235	0.021	0.00017	status=JK
YHR155W	YSP1		1.08012	0.047	1.2234	0.005	-0.14269	0.047	2e-05
YHR156C	LIN1		0.96348	0.091	0.80096	0.042	0.14122	0.091	0.00023
YHR157W	REC104		0.98861	0.069	1.10463	0.081	-0.12068	0.069	9e-05
YHR158C	KEL1		0.90905	0.093	0.85497	0.186	-0.0002	0.092	0.00029
YHR159W	TDA11		1.00608	0.058	0.9004	0.121	0.09054	0.058	5e-05
YHR160C	PEX18		1.1181	0.03	1.0551	0.065	0.07333	0.029	1e-05
YHR161C	YAP1801		0.96868	0.012	0.97037	0.15	-0.02799	0.012	5e-05	status=JK
YHR162W	MPC2		0.89321	0.041	0.97305	0.028	-0.0824	0.041	3e-05
YHR163W	SOL3		0.91959	0.007	0.93634	0.067	-0.02507	0.007	0
YHR167W	THP2		0.98969	0.012	1.0286	0.037	-0.05054	0.012	5e-05	status=JK
YHR171W	ATG7		1.01323	0.026	0.99007	0.033	0.02709	0.026	0
YHR176W	FMO1		1.09413	0.011	1.09259	0.033	-0.00322	0.011	0
YHR178W	STB5		0.7396	0.023	0.71365	0.013	0.03321	0.023	0.00033	status=JK
YHR179W	OYE2		1.07545	0.01	1.02649	0.058	0.05264	0.01	3e-05	status=JK
YHR180W	YHR180W		1.19058	0.078	1.16255	0.057	0.04361	0.078	8e-05
YHR181W	SVP26		1.15945	0.056	1.1117	0.038	0.04705	0.056	3e-05
YHR182W	YHR182W		1.08889	0.049	1.08371	0.157	-0.03299	0.048	2e-05
YHR184W	SSP1		1.05595	0.016	1.1871	0.07	-0.14197	0.016	8e-05	status=JK
YHR185C	PFS1		1.0182	0.026	1.05661	0.038	-0.02988	0.026	0
YHR189W	PTH1		0.88363	0.039	0.86523	0.039	0.01938	0.039	2e-05
YHR191C	CTF8		0.96677	0.02	0.96448	0.043	-0.00717	0.02	0
YHR193C	EGD2		0	0	0	0	0	0	#NUM!
YHR194W	MDM31		0.06934	0.022	0.11508	0.014	-0.03874	0.022	0.00809
YHR195W	NVJ1		1.03934	0.048	1.01167	0.028	0.02928	0.048	3e-05
YHR198C	AIM18		0.73226	0.036	0.83477	0.009	-0.10489	0.036	3e-05
YHR199C	AIM46		1.01387	0.021	1.01021	0.034	0.00236	0.021	0
YHR200W	RPN10		0.87719	0.042	0.86238	0.003	0.01679	0.042	3e-05
YHR202W	YHR202W		0.99365	0.004	0.85033	0.029	0.14372	0.004	0	status=JK
YHR203C	RPS4B		0.74838	0.022	0.71636	0.132	0.03181	0.022	1e-05
YHR204W	MNL1		0.99403	0.021	1.04681	0.01	-0.05415	0.021	0
YHR206W	SKN7		1.0408	0.065	1.06109	0.019	-0.01587	0.065	7e-05
YHR207C	SET5		1.04087	0.03	1.01388	0.046	0.0263	0.03	1e-05
YHR209W	CRG1		1.03281	0.008	1.02994	0.018	0.00405	0.008	2e-05	status=JK
YHR210C	YHR210C		0.97859	0.014	0.9736	0.035	0.00169	0.014	7e-05	status=JK
YIL001W	YIL001W		0.90026	0.023	0.93394	0.078	-0.02612	0.023	0
YIL002C	INP51		0.94465	0.049	0.97775	0.014	-0.03269	0.049	4e-05
YIL005W	EPS1		1.09163	0.017	1.04381	0.012	0.05059	0.017	0
YIL006W	YIA6		0.92697	0.051	0.90683	0.045	0.01757	0.051	5e-05
YIL007C	NAS2		0.95099	0.017	0.97229	0.083	-0.01202	0.017	0
YIL008W	URM1		0.8515	0.05	0.89008	0.108	-0.06123	0.05	6e-05
YIL009C-A	EST3		1.01745	0.041	1.04702	0.026	-0.03332	0.041	2e-05
YIL010W	DOT5		0.97792	0.056	1.00568	0.047	-0.02617	0.056	5e-05
YIL011W	TIR3		0.01345	0.018	0.04529	0.078	0.01343	0.018	0.23102
YIL012W	YIL012W		1.06404	0.035	1.05774	0.055	-0.02029	0.035	0.00036	status=JK
YIL013C	PDR11		1.06023	0.018	1.06498	0.099	-0.00022	0.018	0
YIL014W	MNT3		1.03412	0.036	1.0061	0.106	0.02014	0.036	1e-05
YIL015C-A	YIL015C-A		0.94081	0.139	1.02592	0.007	-0.08139	0.138	0.00086
YIL015W	BAR1		0.94071	0.141	0.96347	0.044	-0.02903	0.14	0.0009
YIL016W	SNL1		1.1141	0.054	1.0751	0.033	0.04041	0.054	3e-05
YIL017C	VID28		0.98802	0.052	0.96101	0.131	0.01267	0.052	4e-05
YIL020C	HIS6		0.53223	0.064	0.532	0.04	0.00465	0.063	0.00046
YIL023C	YKE4		1.00562	0.043	1.00875	0.023	0.00181	0.043	2e-05
YIL024C	YIL024C		1.11748	0.01	1.10649	0.028	0.0065	0.01	3e-05	status=JK
YIL025C	YIL025C		1.02889	0.028	0.97447	0.03	0.05032	0.028	1e-05
YIL027C	EMC5		1.0661	0.072	1.08394	0.062	-0.02259	0.072	8e-05
YIL028W	YIL028W		0.94083	0.004	0.97004	0.04	-0.03461	0.004	1e-05	status=JK
YIL029C	YIL029C		1.0002	0.098	1.07036	0.049	-0.05481	0.098	0.00026
YIL030C	SSM4		1.02535	0.011	1.0314	0.021	-0.01424	0.011	4e-05	status=JK
YIL032C	YIL032C		1.02401	0.022	0.99041	0.02	0.03942	0.022	0.00016	status=JK
YIL034C	CAP2		0.99633	0.068	0.99294	0.059	-0.01098	0.068	9e-05
YIL035C	CKA1		0.95102	0.012	1.03277	0.085	-0.06756	0.012	5e-05	status=JK
YIL036W	CST6		0.95696	0.055	0.92938	0.099	0.04057	0.055	5e-05
YIL037C	PRM2		1.00235	0.026	0.97075	0.013	0.02975	0.026	0
YIL038C	NOT3		0.97242	0.016	0.96726	0.035	0.00335	0.016	0
YIL039W	TED1		1.01924	0.009	0.99616	0.03	0.02645	0.009	3e-05	status=JK
YIL040W	APQ12		0.39829	0.004	0.33775	0.076	0.07546	0.004	4e-05	status=JK
YIL041W	GVP36		0.95976	0.018	1.0214	0.018	-0.06927	0.018	0
YIL042C	PKP1		0.92775	0.018	0.97569	0.018	-0.0478	0.018	0.00012	status=JK
YIL043C	CBR1		1.07794	0.094	1.12786	0.093	-0.03033	0.094	0.00018
YIL044C	AGE2		0.88872	0.005	0.89583	0.046	-0.01532	0.005	1e-05	status=JK
YIL045W	PIG2		1.01615	0.06	1.01844	0.077	-0.01456	0.06	6e-05
YIL047C	SYG1		1.07287	0.004	1.09227	0.027	-0.01441	0.004	0
YIL049W	DFG10		1.02855	0.003	1.03759	0.037	-0.00659	0.003	0	status=JK
YIL050W	PCL7		1.04258	0.077	1.01865	0.035	0.03364	0.077	0.00011
YIL052C	RPL34B		0.98831	0.017	0.91928	0.146	0.03261	0.017	0
YIL053W	RHR2		0.78717	0.081	0.93828	0.04	-0.14379	0.08	0.00029
YIL054W	YIL054W		1.0033	0.042	0.99429	0.151	-0.01833	0.042	2e-05
YIL055C	YIL055C		0.89452	0.151	0.75313	0.121	0.1588	0.151	0.0013
YIL056W	VHR1		0.90737	0.051	0.9494	0.021	-0.02964	0.051	5e-05
YIL057C	RGI2		1.05834	0.038	0.94317	0.128	0.0732	0.038	1e-05
YIL058W	YIL058W		0.99093	0.02	0.88658	0.184	0.05952	0.02	0
YIL059C	YIL059C		1.10379	0.037	1.10096	0.027	-0.0095	0.036	0.00037	status=JK
YIL060W	YIL060W		1.03159	0.082	0.91423	0.125	0.14329	0.082	0.00014
YIL064W	SEE1		0.92773	0.05	0.89239	0.118	0.00747	0.05	4e-05
YIL065C	FIS1		0.87201	0.065	0.94276	0.01	-0.07604	0.064	0.00011
YIL066C	RNR3		1.02246	0.038	1.05861	0.024	-0.03045	0.038	1e-05
YIL067C	YIL067C		0.92395	0.047	0.97351	0.031	-0.0542	0.047	4e-05
YIL070C	MAM33		1.01842	0.011	1.03048	0.02	-0.01728	0.011	4e-05	status=JK
YIL071C	PCI8		1.08325	0.006	1.08602	0.026	0.00295	0.006	1e-05	status=JK
YIL072W	HOP1		0.96598	0.102	1.03625	0.037	-0.07924	0.102	0.00032
YIL073C	SPO22		0.99205	0.058	0.91765	0.081	0.07591	0.057	5e-05
YIL074C	SER33		1.0138	0.022	1.00489	0.038	0.01343	0.022	0
YIL076W	SEC28		0.92103	0.025	0.94932	0.061	-0.02978	0.025	1e-05
YIL077C	YIL077C		0.90012	0.005	0.93038	0.095	-0.04039	0.005	1e-05	status=JK
YIL079C	AIR1		1.03853	0.037	1.05478	0.038	-0.01694	0.037	1e-05
YIL084C	SDS3		0.79869	0.03	0.78547	0.026	0.01987	0.03	0.00047	status=JK
YIL085C	KTR7		0.94538	0.059	0.95225	0.091	0.00038	0.059	7e-05
YIL086C	YIL086C		0.97536	0.011	0.90448	0.044	0.06705	0.011	0
YIL087C	AIM19		1.0347	0.004	0.99349	0.006	0.04074	0.004	1e-05	status=JK
YIL088C	AVT7		1.04807	0.046	1.01824	0.004	0.02809	0.046	2e-05
YIL089W	YIL089W		1.07857	0.076	1.10463	0.067	-0.01415	0.075	9e-05
YIL090W	ICE2		0.52927	0.059	0.56989	0.085	-0.05915	0.059	0.00038
YIL092W	YIL092W		0.95372	0.059	0.90479	0.002	0.04782	0.059	7e-05
YIL093C	RSM25		0.9811	0.042	1.02659	0.019	-0.0461	0.042	2e-05
YIL094C	LYS12		0.65801	0.035	0.69185	0.039	-0.03631	0.035	4e-05
YIL095W	PRK1		0.98791	0.014	1.02839	0.028	-0.04331	0.014	0
YIL096C	YIL096C		1.04009	0.052	1.07514	0.107	-0.0394	0.052	3e-05
YIL097W	FYV10		0.95557	0.077	0.98165	0.014	-0.02266	0.077	0.00014
YIL098C	FMC1		0.93084	0.044	0.9441	0.02	-0.01404	0.044	3e-05
YIL099W	SGA1		1.08281	0.005	1.06918	0.022	0.01613	0.005	1e-05	status=JK
YIL100W	YIL100W		1.01081	0.037	0.99948	0.011	0.00647	0.037	1e-05
YIL101C	XBP1		0.99595	0.06	1.01732	0.008	-0.02569	0.06	6e-05
YIL102C	YIL102C		1.03681	0.05	1.06489	0.017	-0.02318	0.05	3e-05
YIL103W	DPH1		0.97427	0.054	1.02222	0.055	-0.04684	0.053	5e-05
YIL105C	SLM1		1.0019	0.082	1.07653	0.014	-0.07756	0.082	0.00015
YIL107C	PFK26		0.90513	0.13	1.01362	0.035	-0.10567	0.13	0.0008
YIL108W	YIL108W		1.00197	0.043	1.02447	0.017	-0.02116	0.043	2e-05
YIL110W	HPM1		0.71433	0.005	0.76714	0.027	-0.05218	0.005	1e-05	status=JK
YIL111W	COX5B		0.93037	0.065	0.91517	0.045	0.0156	0.065	9e-05
YIL112W	HOS4		0.91564	0.057	0.97915	0.09	-0.06016	0.057	7e-05
YIL113W	SDP1		0.98719	0.004	0.90423	0.148	0.08995	0.004	1e-05	status=JK
YIL114C	POR2		1.03847	0.036	0.99884	0.027	0.03318	0.036	1e-05
YIL116W	HIS5		0.65531	0.004	0.66066	0.047	-0.00285	0.004	1e-05	status=JK
YIL117C	PRM5		1.00834	0.033	1.0253	0.055	-0.00701	0.033	1e-05
YIL119C	RPI1		1.01813	0.057	1.0072	0.017	0.01449	0.057	5e-05
YIL120W	QDR1		0.96725	0.12	1.03611	0.031	-0.067	0.12	0.00052
YIL122W	POG1		0.90392	0.05	0.92605	0.083	-0.01523	0.05	5e-05
YIL123W	SIM1		1.06376	0.009	1.04855	0.007	0.0114	0.009	2e-05	status=JK
YIL124W	AYR1		0.98656	0.069	0.97693	0.054	0.01072	0.069	0.0001
YIL125W	KGD1		0.00732	0.008	0.01235	0.021	0.00671	0.008	0.14969
YIL128W	MET18		0.83446	0.006	0.83943	0.019	-0.00573	0.006	2e-05	status=JK
YIL130W	ASG1		1.01348	0.009	1.0592	0.011	-0.04226	0.009	3e-05	status=JK
YIL131C	FKH1		1.00523	0.007	1.00215	0.05	-0.01052	0.007	2e-05	status=JK
YIL132C	CSM2		0.93035	0.106	0.91041	0.133	0.00892	0.106	0.0004
YIL133C	RPL16A		0.8089	0.018	0.78203	0.144	-0.00471	0.018	0
YIL134W	FLX1		0.68681	0.026	0.67185	0.057	-0.00057	0.026	0.00049	status=JK
YIL135C	VHS2		1.12655	0.008	1.14284	0.038	-0.01561	0.008	0
YIL136W	OM45		1.07277	0.064	1.03703	0.084	0.02218	0.064	6e-05
YIL137C	TMA108		0.97834	0.024	0.84225	0.145	0.10771	0.024	0
YIL138C	TPM2		0.99597	0.027	0.97828	0.053	0.02642	0.027	0.00024	status=JK
YIL139C	REV7		1.03606	0.046	0.92584	0.093	0.09188	0.046	2e-05
YIL140W	AXL2		1.03003	0.065	1.10143	0.066	-0.06276	0.065	7e-05
YIL141W	YIL141W		1.08188	0.096	1.08881	0.049	-0.00847	0.096	0.00019
YIL145C	PAN6		0.99098	0.077	0.98047	0.079	0.01408	0.077	0.00013
YIL146C	ATG32		0.99063	0.122	0.96651	0.078	0.02154	0.121	0.0005
YIL148W	RPL40A		1.0348	0.005	0.97704	0.013	0.05353	0.005	0
YIL149C	MLP2		1.01673	0.032	1.02404	0.066	0.00421	0.032	1e-05
YIL151C	YIL151C		1.00784	0.043	0.94932	0.069	0.04414	0.043	2e-05
YIL152W	YIL152W		0.99045	0.042	0.97704	0.025	0.0063	0.042	2e-05
YIL153W	RRD1		0.89173	0.057	0.89511	0.026	-0.00326	0.057	7e-05
YIL154C	IMP2'		0.87654	0.025	0.83508	0.059	0.04041	0.025	0.00026	status=JK
YIL155C	GUT2		1.00817	0.021	1.01844	0.065	-0.01371	0.021	0
YIL156W	UBP7		1.08188	0.045	1.09753	0.076	-0.03004	0.045	2e-05
YIL157C	COA1		0.97768	0.055	1.0366	0.013	-0.05487	0.054	5e-05
YIL158W	AIM20		1.07892	0.072	1.06296	0.065	0.03323	0.071	8e-05
YIL159W	BNR1		0.96988	0.076	0.96476	0.156	0.02297	0.076	0.00013
[truncated: 2,323 more rows]

## Sheet: DMA U Rep2
Array ORF	Array Name	Array annotation	Normalized colony size (EXPERIMENT)	Normalized colony std. dev. (EXPERIMENT)	Normalized colony size (CONTROL)	Normalized colony std. dev. (CONTROL)	Score	Score stdev	p-Value	Additional information
YAL002W	VPS8		0.71884	0.177	0.92118	0.039	-0.19703	0.177	0.00393
YAL004W	YAL004W		0.95706	0.07	1.09141	0.026	-0.12772	0.069	0.00011
YAL005C	SSA1		0.97475	0.104	1.00953	0.027	-0.03446	0.104	0.00033
YAL007C	ERP2		0.95517	0.153	1.09033	0.036	-0.14593	0.153	0.00111
YAL008W	FUN14		1.20879	0.072	1.21147	0.055	0.00614	0.072	6e-05
YAL010C	MDM10		0.69864	0.118	0.73528	0.016	-0.03604	0.118	0.0013
YAL011W	SWC3		1.00032	0.032	0.90012	0.04	0.09991	0.032	1e-05
YAL013W	DEP1		0.78776	0.056	0.69857	0.027	0.09193	0.056	0.0001
YAL014C	SYN8		1.04192	0.171	1.01807	0.083	0.03058	0.171	0.00119
YAL015C	NTG1		1.05014	0.085	1.03529	0.086	0.02038	0.084	0.00014
YAL017W	PSK1		1.05311	0.066	1.00358	0.023	0.0483	0.066	7e-05
YAL018C	YAL018C		1.09828	0.141	0.9924	0.079	0.10821	0.141	0.00058
YAL019W	FUN30		0.96059	0.044	0.93428	0.037	0.02424	0.044	3e-05
YAL020C	ATS1		0.95238	0.083	0.95253	0.042	0.0062	0.083	0.00018
YAL022C	FUN26		0.96098	0.053	0.88887	0.014	0.06896	0.053	5e-05
YAL023C	PMT2		1.14416	0.012	1.07477	0.019	0.0672	0.012	4e-05	status=JK
YAL024C	LTE1		0.48939	0.017	0.78011	0.092	-0.28435	0.017	0.00042	status=JK
YAL026C	DRS2		0.67958	0.016	0.65498	0.024	0.03377	0.016	0.00019	status=JK
YAL027W	SAW1		0.90744	0.065	0.95753	0.002	-0.05028	0.065	0.0001
YAL028W	FRT2		1.00509	0.086	0.95718	0.027	0.04037	0.086	0.00017
YAL029C	MYO4		1.13106	0.15	1.09825	0.034	0.02489	0.149	0.00063
YAL030W	SNC1		0.94855	0.052	0.934	0.042	0.00781	0.052	5e-05
YAL031C	GIP4		1.04183	0.048	1.09137	0.037	-0.05455	0.048	3e-05
YAL034C	FUN19		1.01333	0.177	0.94516	0.077	0.07122	0.177	0.00144
YAL036C	RBG1		0.99201	0.095	1.05115	0.014	-0.05305	0.095	0.00024
YAL037W	YAL037W		1.08668	0.046	1.09548	0.038	-0.00854	0.046	2e-05
YAL040C	CLN3		0.97049	0.046	0.90964	0.046	0.05079	0.046	3e-05
YAL042W	ERV46		1.09161	0.119	1.11206	0.005	-0.01891	0.118	0.00391	status=JK
YAL043C-A	YAL043C-A		0.815	0.072	0.95776	0.034	-0.14713	0.072	0.00019
YAL045C	YAL045C		1.09593	0.157	1.0715	0.046	0.03361	0.157	0.00079
YAL046C	AIM1		0.97895	0.004	1.17032	0.024	-0.17991	0.004	1e-05	status=JK
YAL048C	GEM1		0.93325	0.001	0.95757	0.01	-0.02126	0.001	0	status=JK
YAL049C	AIM2		0.87125	0.122	0.96304	0.04	-0.09417	0.122	0.00074
YAL051W	OAF1		0.89428	0.028	0.85272	0.028	0.04348	0.028	1e-05
YAL053W	FLC2		1.00976	0.028	0.98073	0.086	0.02136	0.028	0.00025	status=JK
YAL054C	ACS1		1.13652	0.007	1.08197	0.084	0.04114	0.007	1e-05	status=JK
YAL055W	PEX22		0.97451	0.098	0.87742	0.074	0.08392	0.097	0.00027
YAL056W	GPB2		0.94343	0.01	0.96791	0.089	-0.04911	0.01	4e-05	status=JK
YAL058C-A	YAL058C-A		0.90055	0.087	0.94588	0.043	-0.04079	0.087	0.00025
YAL058W	CNE1		1.06595	0.121	0.95414	0.046	0.10826	0.121	0.0004
YAL059W	ECM1		1.03596	0.142	1.00567	0.043	0.03285	0.142	0.0007
YAL060W	BDH1		1.15342	0.123	1.11764	0.035	0.03166	0.123	0.00033
YAL061W	BDH2		0.94647	0.161	1.00697	0.019	-0.06545	0.161	0.00132
YAL062W	GDH3		1.21086	0.179	1.06152	0.039	0.15546	0.179	0.00088
YAL064C-A	TDA8		1.17197	0.156	1.08502	0.08	0.07281	0.156	0.00064
YAL065C	YAL065C		1.20802	0.028	1.11298	0.025	0.1001	0.028	0.00018	status=JK
YAL066W	YAL066W		1.02722	0.079	1.03422	0.072	-0.00215	0.079	0.00013
YAL067C	SEO1		0.96147	0.211	1.02356	0.059	-0.06747	0.211	0.00281
YAL068C	PAU8		0.9656	0.092	0.97007	0.003	-0.005	0.092	0.00024
YAR002C-A	ERP1		1.09476	0.077	1.0315	0.057	0.04685	0.077	0.0001
YAR002W	NUP60		1.01969	0.017	1.04924	0.029	-0.03336	0.017	9e-05	status=JK
YAR003W	SWD1		0.74006	0.049	0.82718	0.048	-0.07678	0.049	8e-05
YAR014C	BUD14		0.67578	0.124	0.77188	0.039	-0.09546	0.124	0.00166
YAR015W	ADE1		1.0013	0.138	1.02341	0.028	-0.01698	0.138	0.00071
YAR018C	KIN3		0.17786	0.18	0.64368	0.083	-0.46221	0.179	0.1422
YAR020C	PAU7		0.76348	0.149	0.94719	0.061	-0.19549	0.149	0.002
YAR023C	YAR023C		1.04111	0.074	1.12911	0.058	-0.10089	0.074	0.0001
YAR027W	UIP3		0.83826	0.104	0.93738	0.047	-0.08929	0.104	0.00052
YAR028W	YAR028W		1.02325	0.084	1.02131	0.063	-0.00494	0.084	0.00015
YAR029W	YAR029W		0.97048	0.007	0.96599	0.041	0.00275	0.007	2e-05	status=JK
YAR030C	YAR030C		1.0814	0.021	1.05017	0.031	0.02661	0.021	0.00013	status=JK
YAR031W	PRM9		1.01315	0.086	1.04078	0.037	-0.03716	0.086	0.00017
YAR035W	YAT1		1.04984	0.167	1.02757	0.055	0.01469	0.167	0.00108
YAR037W	YAR037W		1.05211	0.08	1.1424	0.066	-0.08217	0.08	0.00195	status=JK
YAR040C	YAR040C		0.94924	0.009	0.93773	0.051	0.01307	0.009	3e-05	status=JK
YAR042W	SWH1		1.01212	0.094	1.00382	0.07	0.00076	0.094	0.00022
YAR043C	YAR043C		1.04313	0.162	1.05952	0.017	-0.02603	0.162	0.00102
YAR044W	YAR044W		1.07522	0.115	1.01838	0.026	0.05952	0.115	0.00034
YAR047C	YAR047C		0.97317	0.046	0.95595	0.053	0.00449	0.046	3e-05
YAR050W	FLO1		1.10475	0.078	1.13108	0.017	-0.02383	0.078	0.0001
YBL001C	ECM15		1.11241	0.092	1.11208	0.019	0.00412	0.092	0.00016
YBL003C	HTA2		0.9534	0.124	1.08356	0.029	-0.14766	0.123	0.00059
YBL005W	PDR3		1.11467	0.041	1.06906	0.01	0.04259	0.041	1e-05
YBL007C	SLA1		0.93095	0.012	0.73452	0.023	0.19538	0.012	6e-05	status=JK
YBL008W	HIR1		0.97024	0.085	0.98257	0.028	-0.01865	0.084	0.00018
YBL009W	ALK2		0.97339	0.045	0.8261	0.098	0.12782	0.045	0.00071	status=JK
YBL010C	YBL010C		1.04076	0.063	1.01208	0.045	0.03114	0.063	6e-05
YBL011W	SCT1		0.62051	0.142	0.63843	0.023	-0.0164	0.142	0.00316
YBL013W	FMT1		1.04321	0.127	0.95316	0.058	0.0866	0.126	0.00049
YBL015W	ACH1		1.16278	0.014	1.05455	0.076	0.09807	0.014	5e-05	status=JK
YBL016W	FUS3		0.71683	0.22	0.92985	0.1	-0.19443	0.22	0.00733
YBL017C	PEP1		1.2367	0.1	1.05941	0.084	0.1886	0.1	0.00014
YBL019W	APN2		0.97815	0.034	1.02496	0.013	-0.0491	0.034	0.00041	status=JK
YBL021C	HAP3		1.08779	0.028	0.71774	0.012	0.37015	0.028	0.00023	status=JK
YBL024W	NCL1		1.1849	0.01	0.9529	0.044	0.22701	0.01	3e-05	status=JK
YBL025W	RRN10		0.68221	0.019	0.65071	0.005	0.02905	0.019	0.00026	status=JK
YBL027W	RPL19B		0.13681	0.101	0.58442	0.023	-0.44649	0.101	0.07334
YBL028C	YBL028C		1.11337	0.042	1.05258	0.013	0.05543	0.042	2e-05
YBL029W	YBL029W		1.10956	0.072	1.12049	0.019	-0.02013	0.072	8e-05
YBL031W	SHE1		0.06896	0.013	0.22657	0.038	-0.15082	0.013	0.01105	status=JK
YBL032W	HEK2		1.05013	0.04	1.01619	0.012	0.03557	0.04	0.00048	status=JK
YBL036C	YBL036C		1.0467	0.212	0.96499	0.036	0.08222	0.212	0.00222
YBL037W	APL3		0.92838	0.069	0.92867	0.059	1e-05	0.069	0.00011
YBL039C	URA7		0.8699	0.101	0.82894	0.046	0.03593	0.101	0.00043
YBL042C	FUI1		1.16038	0.07	1.10704	0.032	0.05701	0.07	6e-05
YBL043W	ECM13		1.09042	0.086	1.10257	0.014	-0.01294	0.086	0.00014
YBL046W	PSY4		1.31944	0.005	1.25244	0.049	0.07958	0.005	1e-05	status=JK
YBL047C	EDE1		1.0326	0.032	0.96416	0.015	0.06732	0.032	1e-05
YBL048W	YBL048W		1.12308	0.126	1.13733	0.042	-0.00639	0.125	0.00038
YBL049W	MOH1		1.01845	0.016	1.10208	0.01	-0.0833	0.016	9e-05	status=JK
YBL051C	PIN4		0.88823	0.044	0.89454	0.024	-0.00769	0.044	3e-05
YBL052C	SAS3		1.02258	0.046	1.04618	0.021	-0.01892	0.046	2e-05
YBL053W	YBL053W		1.11254	0.22	1.03711	0.032	0.07013	0.219	0.00205
YBL054W	TOD6		1.18973	0.045	1.07912	0.032	0.11335	0.045	1e-05
YBL055C	YBL055C		0.91794	0.041	0.87196	0.023	0.037	0.04	2e-05
YBL056W	PTC3		1.0767	0.053	1.05134	0.033	0.02441	0.053	3e-05
YBL057C	PTH2		1.13596	0.028	1.12265	0.045	0.00423	0.028	0.0002	status=JK
YBL059W	YBL059W		1.00035	0.079	0.89887	0.009	0.10204	0.078	0.00013
YBL060W	YEL1		0.85558	0.202	0.92269	0.075	-0.05517	0.202	0.00346
YBL061C	SKT5		1.0459	0.094	1.00802	0.025	0.0345	0.094	0.0002
YBL062W	YBL062W		1.06208	0.073	1.04399	0.004	0.01486	0.073	9e-05
YBL063W	KIP1		0.96986	0.095	1.08243	0.043	-0.12742	0.095	0.00026
YBL064C	PRX1		0.97786	0.079	0.9828	0.023	-0.00576	0.079	0.00015
YBL065W	YBL065W		1.12611	0.206	1.00614	0.017	0.11424	0.206	0.00165
YBL066C	SEF1		0.79029	0.119	0.87391	0.069	-0.09091	0.119	0.00093
YBL067C	UBP13		1.08156	0.091	1.11459	0.051	-0.04713	0.091	0.00016
YBL068W	PRS4		1.12108	0.006	1.06143	0.048	0.05382	0.006	1e-05	status=JK
YBL069W	AST1		1.02951	0.082	0.98741	0.063	0.03329	0.082	0.00014
YBL070C	YBL070C		0.96483	0.116	0.92285	0.052	0.04924	0.116	0.00048
YBL071C	YBL071C		1.01936	0.056	0.98132	0.025	0.0433	0.056	0.00101	status=JK
YBL072C	RPS8A		0.51017	0.08	0.43958	0.066	0.05391	0.08	0.00104
YBL075C	SSA3		1.01078	0.026	1.06219	0.062	-0.0647	0.026	0
YBL078C	ATG8		0.74819	0.097	0.97852	0.013	-0.23443	0.096	0.00058
YBL079W	NUP170		0.60491	0.044	0.67836	0.044	-0.07578	0.044	0.00011
YBL081W	YBL081W		0.99847	0.035	0.8473	0.041	0.14206	0.034	1e-05
YBL082C	ALG3		1.18412	0.071	1.13264	0.089	0.05482	0.071	6e-05
YBL083C	YBL083C		1.02691	0.106	1.06606	0.019	-0.04481	0.106	0.0003
YBL085W	BOI1		1.0598	0.06	1.04989	0.021	0.01037	0.06	5e-05
YBL086C	YBL086C		1.05867	0.138	1.08586	0.064	-0.02566	0.138	0.00061
YBL087C	RPL23A		0.89961	0.118	0.94026	0.04	-0.03908	0.118	0.00061
YBL088C	TEL1		1.31599	0.087	1.21935	0.047	0.08648	0.087	8e-05
YBL089W	AVT5		1.02102	0.119	0.91375	0.063	0.10077	0.119	0.00043
YBL091C	MAP2		1.1203	0.132	1.11632	0.074	-0.00539	0.132	0.00044
YBL091C-A	SCS22		1.01301	0.166	0.94941	0.038	0.06805	0.165	0.00118
YBL094C	YBL094C		0.36703	0.067	0.51549	0.265	-0.22194	0.067	0.01082	status=JK
YBL095W	YBL095W		0.95991	0.088	0.96853	0.035	-0.00164	0.088	0.00021
YBL096C	YBL096C		0.95358	0.072	0.99175	0.062	-0.05377	0.072	0.00012
YBL098W	BNA4		0.89992	0.117	0.88087	0.067	0.01307	0.117	0.0006
YBL100C	YBL100C		1.03841	0.104	1.00815	0.055	0.02618	0.104	0.00027
YBL101C	ECM21		1.14327	0.109	1.03813	0.005	0.10351	0.109	0.00024
YBL102W	SFT2		0.8051	0.047	0.99299	0.032	-0.19323	0.047	0.00113	status=JK
YBL103C	RTG3		0.9805	0.107	0.90835	0.092	0.05285	0.107	0.00035
YBL103C	RTG3		0.58202	0.046	0.54101	0.019	0.03197	0.046	0.00209	status=JK
YBL104C	SEA4		1.08474	0.142	0.96507	0.215	0.07658	0.142	0.00061
YBL106C	SRO77		1.022	0.198	0.96351	0.058	0.04882	0.198	0.00194
YBL107C	MIC23		1.04968	0.014	1.06529	0.094	-0.03656	0.014	6e-05	status=JK
YBR001C	NTH2		0.92543	0.1	0.96771	0.053	-0.04153	0.1	0.00034
YBR005W	RCR1		1.13971	0.166	1.15925	0.043	-0.02658	0.166	0.00084
YBR006W	UGA2		1.07587	0.147	1.06447	0.039	0.02161	0.146	0.00069
YBR007C	DSF2		1.03932	0.237	1.03376	0.043	0.00902	0.236	0.00312
YBR008C	FLR1		1.07787	0.206	1.03116	0.051	0.05358	0.205	0.00185
YBR009C	HHF1		0.86487	0.116	0.79247	0.084	0.04307	0.116	0.00065
YBR010W	HHT1		0.75147	0.257	0.77793	0.102	-0.02877	0.257	0.00998
YBR012C	YBR012C		0.84935	0.152	0.92265	0.044	-0.0729	0.151	0.00153
YBR013C	YBR013C		0.93132	0.101	1.01809	0.017	-0.08724	0.101	0.00035
YBR014C	GRX7		1.06085	0.026	0.971	0.032	0.0947	0.026	0.00021	status=JK
YBR015C	MNN2		0.94329	0.055	0.87527	0.066	0.04675	0.055	0.00114	status=JK
YBR016W	YBR016W		1.29008	0.106	1.23307	0.106	0.07068	0.105	0.00015
YBR018C	GAL7		1.00543	0.12	0.99874	0.056	0.01397	0.12	0.00046
YBR019C	GAL10		0.92533	0.126	0.93782	0.084	-0.02263	0.126	0.00069
YBR020W	GAL1		1.00267	0.095	1.01966	0.091	-0.02822	0.095	0.00023
YBR020W	GAL1		1.16196	0.188	1.08717	0.097	0.06572	0.188	0.00114
YBR022W	POA1		0.83385	0.035	0.95621	0.02	-0.12681	0.035	0.00058	status=JK
YBR023C	CHS3		1.0352	0.052	0.9395	0.027	0.09709	0.052	4e-05
YBR024W	SCO2		1.13181	0.154	0.93544	0.021	0.18995	0.154	0.00068
YBR025C	OLA1		0.94602	0.109	0.8914	0.036	0.04485	0.109	0.00042
YBR026C	ETR1		0.71418	0.025	0.80342	0.06	-0.08897	0.025	1e-05
YBR027C	YBR027C		1.36359	0.169	1.21498	0.064	0.14266	0.169	0.00052
YBR028C	YPK3		1.0957	0.1	1.11042	0.028	-0.01264	0.099	0.00021
YBR030W	RKM3		1.02553	0.116	1.15577	0.044	-0.13443	0.116	0.0004
YBR031W	RPL4A		1.03593	0.223	1.073	0.05	-0.03739	0.223	0.00264
YBR032W	YBR032W		1.07787	0.013	1.02453	0.096	0.05073	0.013	5e-05	status=JK
YBR033W	EDS1		1.04387	0.074	1.02583	0.026	0.01505	0.074	0.0001
YBR034C	HMT1		0.95094	0.089	1.01802	0.022	-0.06621	0.088	0.00022
YBR036C	CSG2		0.59542	0.021	0.61433	0.027	-0.03269	0.021	1e-05
YBR040W	FIG1		1.41196	0.021	1.23406	0.028	0.18209	0.021	7e-05	status=JK
YBR041W	FAT1		1.12495	0.129	1.06754	0.032	0.05643	0.129	0.00041
YBR042C	CST26		1.06736	0.007	1.0512	0.031	0.01227	0.007	1e-05	status=JK
YBR043C	QDR3		1.05167	0.067	0.98556	0.043	0.07091	0.067	7e-05
YBR044C	TCM62		0.96261	0.034	0.89103	0.016	0.06478	0.034	0.00041	status=JK
YBR045C	GIP1		1.01661	0.058	0.99799	0.022	0.02168	0.057	5e-05
YBR046C	ZTA1		1.07617	0.174	1.0343	0.02	0.03477	0.173	0.00113
YBR047W	FMP23		0.95498	0.154	0.9564	0.016	-0.00101	0.154	0.00114
YBR048W	RPS11B		0.76521	0.103	0.87631	0.059	-0.09788	0.103	0.00066
YBR050C	REG2		0.92609	0.105	0.98688	0.009	-0.06343	0.104	0.00039
YBR051W	YBR051W		1.2	0.091	1.12084	0.022	0.07546	0.091	0.00012
YBR052C	RFS1		1.03885	0.074	1.00483	0.035	0.03244	0.074	0.0001
YBR053C	YBR053C		1.26965	0.056	1.17278	0.066	0.10216	0.056	2e-05
YBR054W	YRO2		0.99066	0.201	1.0491	0.067	-0.05928	0.201	0.00223
YBR056W	YBR056W		0.91241	0.17	1.01562	0.009	-0.10133	0.17	0.00174
YBR057C	MUM2		0.92759	0.072	0.82846	0.014	0.10093	0.071	0.00013
YBR058C	UBP14		1.01682	0.043	0.95092	0.015	0.06131	0.043	2e-05
YBR059C	AKL1		0.89033	0.128	0.94	0.019	-0.05803	0.128	0.00081
YBR061C	TRM7		0.82552	0.02	0.7824	0.121	0.01043	0.02	0.00019	status=JK
YBR061C	TRM7		1.15943	0.102	1.07373	0.005	0.08376	0.102	0.00019
YBR062C	YBR062C		1.0555	0.065	0.96108	0.011	0.0919	0.065	6e-05
YBR063C	YBR063C		1.02004	0.171	1.04396	0.008	-0.02176	0.171	0.00128
YBR064W	YBR064W		1.11473	0.042	1.19101	0.074	-0.0939	0.042	0.00048	status=JK
YBR065C	ECM2		1.12833	0.146	1.1323	0.007	-0.0035	0.146	0.00059
YBR066C	NRG2		1.18914	0.219	1.18439	0.063	0.01511	0.218	0.00167
YBR067C	TIP1		0.90264	0.134	0.91717	0.068	-0.01326	0.133	0.00088
YBR068C	BAP2		1.16342	0.037	1.06745	0.036	0.10176	0.037	0.00034	status=JK
YBR069C	TAT1		1.0932	0.14	1.14972	0.017	-0.05404	0.14	0.00058
YBR071W	YBR071W		0.86726	0.032	0.85132	0.018	0.0153	0.032	1e-05
YBR072W	HSP26		1.13889	0.039	1.07343	0.057	0.06655	0.039	0.00038	status=JK
YBR073W	RDH54		0.89289	0.01	0.96643	0.025	-0.073	0.01	4e-05	status=JK
YBR074W	YBR074W		0.93913	0.111	1.01821	0.068	-0.09511	0.111	0.00045
YBR075W	YBR075W		1.01478	0.022	1.04955	0.02	-0.02987	0.022	0
YBR075W	YBR075W		1.06542	0.098	1.13016	0.004	-0.06793	0.098	0.00021
YBR076W	ECM8		0.86359	0.104	0.90112	0.031	-0.03931	0.104	0.00048
YBR077C	SLM4		1.31267	0.166	1.27577	0.04	0.03996	0.166	0.00055
YBR078W	ECM33		1.23145	0	1.22013	0.137	0.00838	0	0	status=JK
YBR082C	UBC4		0.95344	0.027	0.83011	0.138	0.14227	0.027	0.00026	status=JK
YBR082C	UBC4		0.956	0.066	0.98027	0.095	-0.0376	0.066	9e-05
YBR083W	TEC1		1.07149	0.027	1.07101	0.07	-0.00518	0.027	0.00021	status=JK
YBR084C-A	RPL19A		0.91608	0.153	0.86577	0.102	0.03648	0.153	0.00126
YBR084W	MIS1		1.08286	0.106	0.96802	0.051	0.1175	0.106	0.00026
YBR085W	AAC3		0.96269	0.031	1.02806	0.089	-0.04647	0.031	1e-05
YBR086C	IST2		1.0332	0.006	1.07232	0.153	-0.05749	0.006	1e-05	status=JK
YBR090C	YBR090C		1.03296	0.038	0.9208	0.014	0.10857	0.038	0.00046	status=JK
YBR090C-A	YBR090C-A		0.95153	0.038	0.95884	0.046	-0.0115	0.038	2e-05
YBR092C	PHO3		0.92577	0.063	0.98042	0.066	-0.04391	0.063	9e-05
YBR093C	PHO5		0.45309	0.034	0.4234	0.077	0.03336	0.034	0.00012
YBR094W	PBY1		1.00289	0.094	1.02984	0.007	-0.03091	0.094	0.00023
YBR095C	RXT2		0.87314	0.056	0.75315	0.189	0.09317	0.056	7e-05
YBR095C	RXT2		0.74304	0.055	0.78243	0.048	-0.04268	0.054	0.00011
YBR098W	MMS4		1.13713	0.072	1.1333	0.071	0.01307	0.072	7e-05
YBR099C	YBR099C		0.82694	0.131	0.85904	0.01	-0.03456	0.131	0.00108
YBR100W	YBR100W		0.95546	0.202	1.00346	0.005	-0.04903	0.201	0.00249
YBR101C	FES1		0.9535	0.037	0.99295	0.074	-0.04529	0.037	2e-05
YBR103W	SIF2		0.61608	0.071	0.74519	0.031	-0.13794	0.071	0.00042
YBR104W	YMC2		0.79208	0.087	0.78015	0.059	0.00309	0.087	0.00036
YBR105C	VID24		1.10624	0.082	1.12392	0.042	-0.0156	0.082	0.00011
YBR106W	PHO88		0.01879	0.011	0.23786	0.18	-0.21087	0.011	0.10483	status=JK
YBR107C	IML3		0.884	0.217	0.9378	0.027	-0.05739	0.216	0.00384
YBR108W	AIM3		1.04013	0.102	0.99249	0.028	0.04711	0.102	0.00026
YBR111C	YSA1		1.05732	0.088	1.07797	0.039	-0.02965	0.088	0.00016
YBR113W	YBR113W		0.84924	0.201	1.04911	0.064	-0.20428	0.201	0.0035
YBR114W	RAD16		1.07514	0.1	0.92671	0.029	0.13934	0.1	0.00022
YBR115C	LYS2		0.33829	0.01	0.24758	0.031	0.07489	0.01	0.0003	status=JK
YBR115C	LYS2		0.34859	0.082	0.25571	0.042	0.09696	0.082	0.00346
YBR116C	YBR116C		1.08511	0.043	0.93443	0.053	0.1629	0.043	0.00052	status=JK
YBR118W	TEF2		0.87626	0	0.96077	0.141	-0.07402	0	0	status=JK
YBR119W	MUD1		0.86401	0.199	1.06228	0.113	-0.20473	0.198	0.0032
YBR121C	GRS1		0.97549	0.105	0.84958	0.06	0.11145	0.104	0.00034
YBR122C	MRPL36		0.94665	0.058	1.13378	0.042	-0.17724	0.058	0.00125	status=JK
YBR125C	PTC4		0.84018	0.02	0.97959	0.017	-0.1312	0.02	0.00019	status=JK
YBR126C	TPS1		0.77782	0.114	0.77063	0.063	-0.01003	0.114	0.00085
YBR128C	ATG14		0.93068	0.138	0.94048	0.038	-0.0158	0.138	0.00088
YBR129C	OPY1		0.96559	0.065	0.91977	0.023	0.04787	0.065	8e-05
YBR130C	SHE3		1.13411	0.056	1.09908	0.008	0.03313	0.056	3e-05
YBR131W	CCZ1		0.69529	0.081	0.62446	0.035	0.06925	0.081	0.00043
YBR132C	AGP2		1.13043	0.031	1.12718	0.032	0.0006	0.031	0.00026	status=JK
YBR134W	YBR134W		1.17702	0.059	1.141	0.034	0.03711	0.059	3e-05
YBR137W	YBR137W		0.91039	0.108	0.83637	0.034	0.07342	0.107	0.00045
YBR138C	YBR138C		1.19741	0.04	1.11036	0.054	0.09548	0.04	1e-05
YBR139W	YBR139W		0.9028	0.074	1.10697	0.063	-0.1913	0.074	0.00015
YBR141C	YBR141C		1.13268	0.027	0.93095	0.027	0.20222	0.027	0.00018	status=JK
YBR144C	YBR144C		0.86642	0.236	0.99495	0.047	-0.13351	0.236	0.00525
YBR145W	ADH5		0.96436	0.182	0.8414	0.02	0.12717	0.182	0.0018
YBR146W	MRPS9		0.83308	0.214	0.99568	0.157	-0.14167	0.214	0.00441
YBR147W	RTC2		1.04244	0.048	1.0364	0.078	-0.00058	0.048	0.0007	status=JK
YBR148W	YSW1		1.21666	0.111	1.25605	0.061	-0.03893	0.111	0.00021
YBR149W	ARA1		0.8942	0.053	0.8595	0.045	0.03116	0.053	6e-05
YBR150C	TBS1		0.87213	0.119	0.90269	0.028	-0.03353	0.119	0.00069
YBR151W	APD1		1.04618	0.013	0.91595	0.042	0.1193	0.013	5e-05	status=JK
YBR156C	SLI15		0.94485	0.037	1.01961	0.04	-0.07637	0.037	2e-05
YBR157C	ICS2		1.02105	0.11	0.97228	0.063	0.0325	0.11	0.00035
YBR158W	AMN1		0.95794	0.137	1.02805	0.093	-0.08389	0.137	0.0008
YBR159W	IFA38		1.26613	0.106	1.13435	0.013	0.12345	0.106	0.00016
YBR161W	CSH1		0.97744	0.011	1.04235	0.026	-0.06308	0.011	4e-05	status=JK
YBR162C	TOS1		1.02721	0.07	1.02995	0.021	-0.00162	0.07	9e-05
YBR162W-A	YSY6		0.95015	0.132	0.93971	0.024	0.00695	0.132	0.00073
YBR164C	ARL1		0.92029	0.153	0.90358	0.047	0.02001	0.153	0.00125
YBR165W	UBS1		0.99827	0.05	1.033	0.186	0.00762	0.05	4e-05
YBR165W	UBS1		1.00186	0.092	1.03441	0.059	-0.04044	0.092	0.00021
YBR166C	TYR1		0.8393	0.167	0.99725	0.013	-0.15598	0.167	0.0021
YBR168W	PEX32		1.04406	0.016	0.96461	0.007	0.08223	0.016	7e-05	status=JK
YBR169C	SSE2		1.04117	0.002	1.02337	0.046	0.00992	0.002	0	status=JK
YBR170C	NPL4		0.68258	0.262	0.7594	0.031	-0.09125	0.261	0.01371
YBR171W	SEC66		0.96748	0.043	0.86853	0.063	0.11256	0.043	2e-05
YBR172C	SMY2		0.93163	0.015	1.06153	0.008	-0.13293	0.015	9e-05	status=JK
YBR174C	YBR174C		0.98406	0.052	1.01638	0.007	-0.03187	0.052	4e-05
YBR175W	SWD3		0.97837	0.075	1.00402	0.021	-0.0309	0.075	0.00012
YBR176W	ECM31		0.92228	0.196	1.02675	0.021	-0.11015	0.196	0.00254
YBR177C	EHT1		1.1191	0.136	0.94777	0.108	0.15222	0.135	0.00048
YBR178W	YBR178W		1.21202	0.121	1.14245	0.014	0.06775	0.121	0.00027
YBR180W	DTR1		0.84481	0.06	0.9053	0.018	-0.06423	0.06	0.0001
YBR181C	RPS6B		0.75964	0.107	0.69469	0.012	0.06241	0.107	0.00077
YBR182C	SMP1		0.9662	0.026	0.98904	0.003	-0.02315	0.026	1e-05
YBR183W	YPC1		1.09055	0.133	1.11751	0.048	-0.02762	0.133	0.00049
YBR184W	YBR184W		0.96821	0.021	0.99118	0.05	-0.02129	0.021	0.00016	status=JK
YBR185C	MBA1		0.95625	0.156	0.75288	0.043	0.1979	0.156	0.00117
YBR186W	PCH2		0.9818	0.022	0.99644	0.01	-0.01402	0.022	0
YBR187W	GDT1		1.002	0.102	0.97572	0.066	0.02685	0.102	0.00029
YBR188C	NTC20		1.05397	0.216	1.09063	0.036	-0.04091	0.216	0.0023
YBR189W	RPS9B		0.40999	0.071	0.23184	0.024	0.16482	0.071	0.00139
YBR194W	AIM4		0.72221	0.186	0.77442	0.017	-0.05478	0.186	0.00446
YBR195C	MSI1		1.20561	0.173	1.16011	0.077	0.02508	0.173	0.00081
YBR197C	YBR197C		1.18991	0.129	1.23375	0.092	-0.06788	0.129	0.00035
YBR199W	KTR4		1.0215	0.075	0.94721	0.019	0.07011	0.075	0.00011
YBR200W	BEM1		0.39216	0.139	0.76907	0.092	-0.38167	0.138	0.01094
YBR201W	DER1		0.94871	0.009	1.02189	0.046	-0.06589	0.008	0
YBR203W	COS111		1.17256	0.062	1.16384	0.053	0.00331	0.062	4e-05
YBR204C	LDH1		0.97779	0.017	1.03108	0.01	-0.05166	0.017	0.0001	status=JK
YBR205W	KTR3		1.01774	0.066	1.00656	0.027	0.00202	0.066	8e-05
YBR206W	YBR206W		1.04927	0.017	0.94324	0.054	0.11559	0.017	0
YBR207W	FTH1		1.23628	0.154	1.13511	0.047	0.09875	0.154	0.00053
YBR208C	DUR1		1.25377	0.06	1.10671	0.06	0.14086	0.06	0.00076	status=JK
YBR209W	YBR209W		1.25665	0.144	1.05737	0.081	0.21698	0.144	0.00041
YBR210W	ERV15		1.15313	0.094	1.1972	0.054	-0.05306	0.094	0.00015
YBR212W	NGR1		1.071	0.084	1.0593	0.036	0.01645	0.084	0.00013
YBR213W	MET8		1.01534	0.133	1.04078	0.019	-0.02056	0.133	0.00062
YBR214W	SDS24		0.98042	0.107	0.99707	0.048	-0.02532	0.107	0.00036
YBR215W	HPC2		1.1979	0.079	1.22484	0.011	-0.031	0.079	8e-05
YBR216C	YBP1		0.9944	0.09	1.03184	0.038	-0.04654	0.09	0.0002
YBR217W	ATG12		0.80432	0.133	0.83228	0.016	-0.03501	0.133	0.00122
YBR218C	PYC2		1.21147	0.161	1.1467	0.052	0.05886	0.161	0.00064
YBR219C	YBR219C		1.08252	0.036	1.04861	0.071	0.03548	0.036	0.00038	status=JK
YBR220C	YBR220C		0.95986	0.282	1.01402	0.082	-0.04249	0.282	0.00649
YBR221C	PDB1		0.77944	0.049	0.71023	0.026	0.067	0.049	0.00131	status=JK
YBR222C	PCS60		0.89325	0.189	1.0413	0.036	-0.14657	0.188	0.00249
YBR223C	TDP1		1.0058	0.055	0.79436	0.081	0.19889	0.055	0.00101	status=JK
YBR224W	YBR224W		0.98752	0.045	0.92106	0.026	0.06849	0.045	0.00068	status=JK
YBR225W	YBR225W		0.89371	0.087	1.01458	0.005	-0.12139	0.086	0.00025
YBR226C	YBR226C		1.03617	0.078	0.97394	0.05	0.06994	0.078	0.00012
YBR227C	MCX1		0.87306	0.049	0.88535	0.017	-0.00794	0.049	5e-05
YBR228W	SLX1		1.06714	0.045	0.98934	0.014	0.07206	0.045	2e-05
YBR229C	ROT2		0.97699	0.074	0.97518	0.013	0.002	0.074	0.00012
YBR230C	OM14		1.00129	0.014	1.03393	0.041	-0.04026	0.014	7e-05	status=JK
YBR231C	SWC5		0.43046	0.01	0.38398	0.084	0.03779	0.01	0.00017	status=JK
YBR232C	YBR232C		1.09162	0.084	1.10855	0.022	-0.01164	0.084	0.00012
YBR233W	PBP2		0.89476	0.098	0.90795	0.031	-0.0131	0.098	0.00036
YBR235W	VHC1		0.94159	0.055	0.97526	0.044	-0.03929	0.055	5e-05
YBR238C	YBR238C		0.77329	0.076	0.53311	0.055	0.24529	0.076	0.00026
YBR239C	ERT1		1.08854	0.027	1.06804	0.005	0.02064	0.027	0
YBR240C	THI2		1.01442	0.095	1.03306	0.038	-0.01381	0.094	0.00022
YBR241C	YBR241C		0.88481	0.065	0.98475	0.031	-0.10464	0.065	0.00011
YBR242W	YBR242W		1.01674	0.023	0.95959	0.017	0.05247	0.023	0
YBR244W	GPX2		1.00503	0.059	0.99549	0.04	0.02124	0.059	5e-05
YBR245C	ISW1		1.01437	0.093	0.93114	0.011	0.08548	0.093	0.00021
YBR246W	RRT2		1.05905	0.026	1.0691	0.023	-0.01145	0.026	0.0002	status=JK
YBR248C	HIS7		0.43869	0.071	0.38066	0.008	0.05609	0.07	0.00112
YBR249C	ARO4		1.0892	0.071	1.08877	0.027	0.00303	0.071	8e-05
YBR250W	SPO23		0.92408	0.107	1.00223	0.055	-0.07408	0.107	0.00042
YBR255W	MTC4		0.97071	0.176	0.96658	0.086	0.00968	0.175	0.00159
YBR258C	SHG1		1.17855	0.031	1.04774	0.051	0.11967	0.031	0.00022	status=JK
YBR259W	YBR259W		1.00179	0.043	1.01461	0.037	-0.00632	0.043	2e-05
YBR260C	RGD1		1.1077	0.048	1.14532	0.03	-0.0383	0.048	2e-05
YBR261C	TAE1		1.01674	0.049	1.01661	0.009	0.00522	0.049	0.00077	status=JK
YBR262C	AIM5		0.90172	0.039	0.88288	0.009	0.02025	0.039	2e-05
YBR263W	SHM1		1.09746	0.119	1.04556	0.026	0.05977	0.119	0.00035
YBR264C	YPT10		1.03067	0.052	1.03254	0.017	-0.00272	0.052	3e-05
YBR266C	YBR266C		0.53051	0.031	0.49297	0.01	0.03741	0.031	5e-05
YBR267W	REI1		0.44052	0.049	0.3738	0.053	0.06134	0.049	0.00039
YBR269C	FMP21		1.01108	0.068	1.01167	0.04	-0.00465	0.067	8e-05
YBR270C	BIT2		1.11645	0.005	1.06576	0.045	0.05108	0.005	1e-05	status=JK
YBR271W	EFM2		1.00992	0.026	0.98455	0.019	0.01621	0.026	0.00023	status=JK
YBR272C	HSM3		0.95862	0.068	0.96437	0.068	-0.00231	0.068	0.0001
YBR273C	UBX7		0.784	0.031	0.92066	0.06	-0.11792	0.031	0.00052	status=JK
YBR274W	CHK1		1.08811	0.109	1.0807	0.01	0.0117	0.109	0.00027
YBR275C	RIF1		0.90314	0.006	0.88175	0.081	0.01282	0.006	1e-05	status=JK
YBR276C	PPS1		1.10792	0.208	1.14162	0.073	-0.02539	0.208	0.00178
YBR277C	YBR277C		1.04434	0.073	1.04174	0.013	0.0104	0.073	9e-05
YBR278W	DPB3		0.9852	0.076	0.94623	0.052	0.04896	0.076	0.00013
YBR280C	SAF1		1.024	0.139	1.01868	0.063	0.00908	0.139	0.00068
YBR281C	DUG2		1.06289	0.08	1.04829	0.045	0.02543	0.08	0.00012
YBR283C	SSH1		0.85011	0.092	0.77237	0.021	0.0801	0.092	0.00035
YBR284W	YBR284W		1.0057	0.051	1.01428	0.043	-0.00844	0.051	0.00087	status=JK
YBR285W	YBR285W		1.11718	0.111	1.10911	0.05	0.01236	0.111	0.00027
YBR286W	APE3		1.04904	0.092	1.01626	0.065	0.03704	0.091	0.00018
YBR287W	YBR287W		0.79453	0.062	0.88487	0.013	-0.09142	0.062	0.00013
YBR288C	APM3		0.90182	0.104	0.93309	0.045	-0.03284	0.104	0.00042
YBR289W	SNF5		0.50891	0.014	0.29387	0.048	0.20784	0.014	1e-05
YBR290W	BSD2		0.78529	0.022	0.91082	0.039	-0.12835	0.022	0.00025	status=JK
YBR291C	CTP1		0.83461	0.039	0.98185	0.044	-0.14876	0.039	0.00073	status=JK
YBR292C	YBR292C		1.03934	0.128	1.02962	0.102	0.00882	0.128	0.00051
YBR293W	VBA2		0.90968	0.126	0.90399	0.06	-0.01179	0.126	0.00072
YBR294W	SUL1		0.42473	0.257	0.39628	0.285	-0.02779	0.256	0.04552
YBR295W	PCA1		0.98618	0.087	0.99239	0.057	-0.00044	0.087	0.00019
YBR296C	PHO89		1.09999	0.027	1.08997	0.067	0.00083	0.027	0.00021	status=JK
YBR297W	MAL33		1.02378	0.075	1.01326	0.065	0.00995	0.075	0.00011
YBR298C	MAL31		0.8339	0.003	0.94069	0.063	-0.11973	0.003	0	status=JK
YBR299W	MAL32		1.1158	0.039	1.22565	0.2	-0.1195	0.039	1e-05
YBR300C	YBR300C		1.09826	0.145	1.03288	0.055	0.05986	0.145	0.00062
YBR301W	PAU24		0.97814	0.119	0.97356	0.052	0.0073	0.119	0.00049
YCL001W	RER1		0.9582	0.17	1.04672	0.023	-0.08992	0.17	0.00151
YCL001W-A	YCL001W-A		1.2032	0.022	1.17068	0.011	0.0343	0.022	0.00012	status=JK
YCL002C	YCL002C		0.94708	0.028	1.0553	0.028	-0.11291	0.028	0.0003	status=JK
YCL006C	YCL006C		1.02917	0.087	0.90969	0.029	0.1236	0.087	0.00017
YCL009C	ILV6		1.14031	0.059	1.15072	0.004	-0.00764	0.058	4e-05
YCL010C	SGF29		0.98776	0.015	0.91228	0.062	0.07138	0.015	8e-05	status=JK
YCL011C	GBP2		1.07692	0.086	1.02658	0.013	0.05419	0.086	0.00014
YCL012W	YCL012W		1.08158	0.14	1.07139	0.086	0.0045	0.14	0.00059
YCL013W	YCL013W		0.86098	0.01	0.8546	0.009	0.01201	0.009	4e-05	status=JK
YCL014W	BUD3		1.01979	0.11	1.06731	0.047	-0.05446	0.11	0.00034
YCL016C	DCC1		0.86508	0.022	0.73355	0.012	0.12646	0.022	0
YCL022C	YCL022C		0.8468	0.126	0.81854	0.085	0.00833	0.126	0.0009
YCL023C	YCL023C		0.87181	0.14	0.84531	0.108	0.02673	0.14	0.00112
YCL024W	KCC4		0.87845	0.027	0.92075	0.064	-0.03228	0.027	1e-05
YCL025C	AGP1		0.8637	0.042	0.76953	0.006	0.09596	0.042	3e-05
YCL026C	YCL026C		1.19894	0.036	1.18087	0.105	-0.00338	0.036	0.0003	status=JK
YCL026C-A	FRM2		0.50554	0.074	1.08064	0.015	-0.56531	0.074	0.00711	status=JK
YCL027W	FUS1		1.21916	0.038	1.09536	0.023	0.12783	0.038	1e-05
YCL028W	RNQ1		1.07853	0.066	1.0985	0.038	-0.0204	0.065	6e-05
YCL029C	BIK1		1.02669	0.032	0.99414	0.041	0.03599	0.032	1e-05
YCL030C	HIS4		0.42566	0.087	0.42018	0.061	0.01504	0.087	0.00225
YCL032W	STE50		0.95496	0.106	0.91088	0.011	0.04495	0.106	0.00038
YCL033C	MXR2		0.86842	0.151	0.85492	0.085	0.02747	0.15	0.0014
YCL034W	LSB5		0.96914	0.072	0.95606	0.054	0.02585	0.072	0.00011
YCL035C	GRX1		1.08417	0.054	1.05591	0.015	0.03404	0.054	3e-05
YCL036W	GFD2		1.1732	0.098	1.20911	0.058	-0.03093	0.098	0.00016
YCL037C	SRO9		0.47764	0.217	0.77973	0.136	-0.31063	0.217	0.02178
YCL038C	ATG22		0.98407	0.103	0.94149	0.033	0.04846	0.102	0.00031
YCL039W	GID7		1.05515	0.112	1.09612	0.027	-0.03886	0.111	0.00032
YCL040W	GLK1		1.20441	0.022	1.05736	0.067	0.16157	0.022	0.00012	status=JK
YCL042W	YCL042W		1.09357	0.03	1.08942	0.026	0.00687	0.03	1e-05
YCL044C	MGR1		0.81892	0.05	0.72015	0.022	0.10944	0.05	6e-05
YCL045C	EMC1		1.1969	0.071	1.19344	0.007	0.00539	0.071	6e-05
YCL046W	YCL046W		1.06611	0.108	0.98473	0.064	0.07321	0.107	0.00028
YCL047C	POF1		1.11027	0.078	0.99245	0.009	0.11823	0.078	9e-05
YCL048W	SPS22		0.95365	0.057	0.98313	0.045	-0.03618	0.057	6e-05
YCL049C	YCL049C		0.89064	0.079	0.91028	0.029	-0.01562	0.078	0.00019
YCL050C	APA1		1.05195	0.185	1.07581	0.024	-0.0207	0.184	0.00145
YCL051W	LRE1		1.16255	0.051	1.11001	0.027	0.06278	0.051	2e-05
YCL055W	KAR4		0.76479	0.124	0.80308	0.036	-0.03721	0.124	0.00116
YCL056C	PEX34		1.05624	0.021	1.12493	0.016	-0.06713	0.021	0.00013	status=JK
YCL057W	PRD1		0.80745	0.342	1.01014	0.018	-0.19326	0.342	0.01805
YCL060C	YCL060C		1.06237	0.1	1.07543	0.012	-0.0108	0.1	0.00023
YCL061C	MRC1		0.93447	0.088	0.91422	0.075	0.00575	0.088	0.00023
YCL062W	YCL062W		0.69325	0.234	0.844	0.068	-0.15306	0.234	0.00965
YCL063W	VAC17		1.04323	0.048	0.94576	0.057	0.1034	0.048	0.00069	status=JK
YCL064C	CHA1		0.98539	0.138	0.96836	0.038	0.01665	0.137	0.00074
YCL069W	VBA3		0.93625	0.016	0.98924	0.028	-0.04677	0.016	0.0001	status=JK
YCL074W	YCL074W		0.90922	0.119	0.77879	0.022	0.13098	0.119	0.00061
YCL075W	YCL075W		0.9505	0.08	0.91844	0.037	0.03543	0.079	0.00016
YCL076W	YCL076W		0.83737	0.146	0.86296	0.061	-0.0163	0.146	0.00143
YCR001W	YCR001W		1.17912	0.053	1.1974	0.048	-0.0259	0.053	3e-05
YCR005C	CIT2		0.99832	0.053	0.98027	0.016	0.02073	0.053	4e-05
YCR006C	YCR006C		1.00813	0.105	1.00249	0.014	0.00635	0.105	0.00031
YCR007C	YCR007C		1.09641	0.066	1.09822	0.009	-0.00102	0.066	6e-05
YCR008W	SAT4		1.0495	0.182	1.02776	0.011	0.02398	0.182	0.0014
YCR009C	RVS161		0.83748	0.058	0.60277	0.024	0.2362	0.058	9e-05
YCR010C	ADY2		1.05951	0.135	1.10666	0.027	-0.04247	0.135	0.00056
YCR011C	ADP1		1.14797	0.038	1.19647	0.018	-0.03836	0.038	1e-05
YCR014C	POL4		1.14373	0.141	1.07124	0.011	0.07831	0.14	0.00051
YCR015C	YCR015C		0.99605	0.071	1.00752	0.019	-0.01793	0.071	0.0001
YCR016W	YCR016W		0.95393	0.069	0.95792	0.013	0.00291	0.069	0.0001
YCR017C	CWH43		1.16104	0.062	1.13726	0.013	0.02474	0.062	4e-05
YCR019W	MAK32		1.1176	0.09	1.08598	0.064	0.02248	0.09	0.00014
YCR020C	PET18		0.96902	0.131	0.9492	0.022	0.02275	0.131	0.00067
YCR020C-A	MAK31		1.12768	0.151	1.06269	0.029	0.06561	0.151	0.00065
YCR021C	HSP30		1.19376	0.15	1.16217	0.052	0.04448	0.15	0.00054
YCR022C	YCR022C		1.31505	0.115	1.14291	0.007	0.17376	0.114	0.00018
YCR023C	YCR023C		1.1581	0.089	1.08367	0.042	0.07779	0.089	0.00012
YCR024C-A	PMP1		1.0191	0.034	0.9913	0.026	0.04276	0.034	0.00038	status=JK
YCR025C	YCR025C		1.04958	0.032	1.12244	0.059	-0.06261	0.032	0.0003	status=JK
YCR026C	NPP1		1.08418	0.041	1.15151	0.07	-0.06769	0.041	2e-05
YCR027C	RHB1		1.19811	0.025	1.12988	0.051	0.07222	0.025	0.00015	status=JK
YCR028C-A	RIM1		0.87036	0.077	0.75357	0.013	0.11798	0.077	0.00019
YCR030C	SYP1		1.09183	0.102	1.0482	0.089	0.04098	0.101	0.00022
YCR031C	RPS14A		0.98896	0.038	0.91133	0.073	0.06031	0.038	2e-05
YCR032W	BPH1		1.01646	0.187	0.97025	0.053	0.061	0.186	0.00165
YCR033W	SNT1		0.43835	0.164	0.51669	0.019	-0.08313	0.164	0.01289
YCR034W	FEN1		0.85773	0.142	0.80415	0.04	0.04536	0.142	0.00123
YCR036W	RBK1		0.79786	0.303	1.01613	0.055	-0.23353	0.303	0.0134
YCR037C	PHO87		1.04596	0.044	0.94835	0.012	0.09489	0.044	2e-05
YCR043C	YCR043C		1.32497	0.082	1.20331	0.058	0.13764	0.082	7e-05
YCR044C	PER1		1.18005	0.154	1.172	0.071	0.01069	0.154	0.00061
YCR045C	RRT12		1.07421	0.086	1.00279	0.017	0.07708	0.086	0.00014
YCR048W	ARE1		0.91504	0.06	1.03343	0.012	-0.11804	0.06	8e-05
YCR049C	YCR049C		1.02718	0.22	1.10261	0.06	-0.08631	0.22	0.00261
YCR050C	YCR050C		0.96842	0.024	0.99535	0.081	-0.0281	0.024	0.0002	status=JK
YCR051W	YCR051W		1.21226	0.14	1.22341	0.042	-0.01906	0.14	0.00042
YCR053W	THR4		0.4732	0.083	0.34123	0.087	0.11751	0.083	0.00144
YCR059C	YIH1		1.06032	0.155	0.92872	0.104	0.10991	0.154	0.00084
YCR060W	TAH1		1.11687	0.017	1.03995	0.027	0.06411	0.017	8e-05	status=JK
YCR061W	YCR061W		1.06394	0.053	1.14989	0.022	-0.07546	0.053	3e-05
YCR062W	YCR062W		1.20816	0.23	1.10146	0.009	0.1036	0.23	0.00184
YCR063W	BUD31		0.50597	0.046	0.57676	0.008	-0.0671	0.046	0.00279	status=JK
YCR065W	HCM1		1.1063	0.106	0.91782	0.048	0.196	0.106	0.00024
YCR067C	SED4		1.01916	0.123	0.99434	0.006	0.02375	0.123	0.00048
YCR068W	ATG15		1.10608	0.081	1.0721	0.011	0.03463	0.081	0.00011
YCR069W	CPR4		1.23345	0.096	1.16421	0.01	0.07157	0.096	0.00013
YCR071C	IMG2		0.65247	0.004	0.48909	0.089	0.16603	0.004	1e-05	status=JK
YCR073C	SSK22		1.13815	0.051	0.98748	0.044	0.15843	0.051	3e-05
YCR073W-A	SOL2		0.98464	0.033	0.98501	0.029	0.00366	0.033	1e-05
YCR075C	ERS1		1.25939	0.051	1.19776	0.052	0.07563	0.051	2e-05
YCR076C	FUB1		1.2381	0.087	1.26621	0.016	-0.02749	0.086	9e-05
YCR077C	PAT1		0.80391	0.121	0.7645	0.053	0.03331	0.121	0.00093
YCR079W	PTC6		1.00989	0.163	0.9754	0.031	0.03115	0.163	0.00114
YCR081W	SRB8		0.58182	0.074	0.49456	0.01	0.08497	0.074	0.00056
YCR082W	AHC2		1.07163	0.062	1.03973	0.034	0.0354	0.062	5e-05
YCR083W	TRX3		1.1374	0.052	1.10631	0.034	0.02805	0.052	3e-05
YCR085W	YCR085W		1.15278	0.007	1.12724	0.051	0.01447	0.007	1e-05	status=JK
YCR086W	CSM1		1.00834	0.036	1.02657	0.005	-0.018	0.036	1e-05
YCR087C-A	YCR087C-A		1.01826	0.053	1.11349	0.028	-0.0911	0.053	4e-05
YCR087W	YCR087W		1.11864	0.097	1.08908	0.043	0.0357	0.097	0.00018
YCR088W	ABP1		0.96467	0.039	0.97119	0.034	-0.00753	0.039	2e-05
YCR089W	FIG2		1.1088	0.047	1.06936	0.072	0.02409	0.047	2e-05
YCR090C	YCR090C		1.08521	0.15	0.99328	0.046	0.09363	0.15	0.00072
YCR091W	KIN82		0.80934	0.078	0.91859	0.055	-0.11115	0.078	0.00025
YCR092C	MSH3		0.93817	0.055	0.96719	0.051	-0.01993	0.055	6e-05
YCR095C	OCA4		1.18149	0.084	1.04521	0.059	0.1201	0.084	0.0001
YCR098C	GIT1		1.14002	0.061	1.14108	0.032	0.00654	0.061	4e-05
YCR099C	YCR099C		1.17659	0.018	1.11893	0.035	0.05818	0.018	0
YCR100C	YCR100C		1.25219	0.119	1.1751	0.009	0.08369	0.119	0.00023
YCR101C	YCR101C		1.09599	0.116	1.07177	0.009	0.02524	0.116	0.00032
YCR102C	YCR102C		1.11581	0.1	1.05542	0.009	0.06663	0.1	0.0002
YCR102W-A	YCR102W-A		1.01018	0.031	0.97609	0.05	0.0426	0.031	0.00031	status=JK
YCR105W	ADH7		0.92958	0.167	1.03088	0.019	-0.10476	0.167	0.00157
YCR106W	RDS1		0.89756	0.084	1.05866	0.037	-0.15573	0.084	0.00022
YCR107W	AAD3		1.06667	0.039	1.05448	0.049	0.02661	0.039	1e-05
YDL001W	RMD1		1.01652	0.122	1.03269	0.016	-0.0215	0.121	0.00047
YDL002C	NHP10		0.88725	0.018	0.76266	0.064	0.11376	0.018	0.00014	status=JK
YDL006W	PTC1		0.79799	0.068	0.8273	0.028	-0.02465	0.068	0.00017
YDL010W	GRX6		1.10145	0.141	1.06214	0.013	0.04324	0.141	0.00057
YDL011C	YDL011C		1.09955	0.185	1.15871	0.038	-0.06564	0.185	0.00128
YDL012C	YDL012C		1.0004	0.105	1.01919	0.014	-0.01995	0.105	0.00031
YDL013W	SLX5		0.47279	0.138	0.37435	0.006	0.10014	0.138	0.00636
YDL018C	ERP3		1.08994	0.013	0.97909	0.071	0.11142	0.013	5e-05	status=JK
YDL019C	OSH2		1.18098	0.039	1.09995	0.04	0.07259	0.039	1e-05
YDL020C	RPN4		0.64937	0.093	0.68343	0.043	-0.03707	0.093	0.00081
YDL023C	YDL023C		1.02651	0.167	1.0802	0.035	-0.04949	0.167	0.00116
YDL024C	DIA3		0.9794	0.031	0.96209	0.036	0.01709	0.031	0.00033	status=JK
YDL025C	RTK1		1.2956	0.072	1.20836	0.048	0.08938	0.072	5e-05
YDL026W	YDL026W		0.99781	0.132	0.99448	0.078	0.00537	0.132	0.00063
YDL027C	YDL027C		0.93198	0.018	0.9217	0.08	-0.00737	0.018	0.00013	status=JK
YDL033C	SLM3		0.6451	0.094	0.4187	0.065	0.2278	0.094	0.00083
YDL034W	YDL034W		1.14898	0.013	1.1214	0.117	0.05253	0.013	4e-05	status=JK
YDL035C	GPR1		1.01609	0.092	0.92542	0.008	0.08795	0.091	0.0002
YDL036C	PUS9		1.15709	0.128	1.10194	0.068	0.06186	0.127	0.00037
YDL037C	BSC1		1.02521	0.075	1.09221	0.048	-0.05466	0.075	0.00011
YDL038C	YDL038C		1.09302	0.158	1.0998	0.043	-0.0027	0.157	0.00081
YDL039C	PRM7		1.00942	0.069	1.05385	0.114	-0.05049	0.068	9e-05
YDL040C	NAT1		0.94136	0.064	0.96851	0.11	-0.02918	0.063	8e-05
YDL041W	YDL041W		0.00566	0.007	0	0	0.00565	0.007	0.1849
YDL042C	SIR2		0.00029	0	0	0	0.00029	0	0.42265	status=JK
YDL046W	NPC2		0.93274	0.044	1.0538	0.031	-0.12615	0.044	3e-05
YDL048C	STP4		1.04773	0.022	1.08198	0.052	-0.02743	0.022	0.00015	status=JK
YDL050C	YDL050C		1.11017	0.035	1.14834	0.064	-0.04231	0.035	1e-05
YDL051W	LHP1		1.23159	0.238	1.11557	0.07	0.1124	0.237	0.00192
YDL052C	SLC1		1.04401	0.067	1.00634	0.045	0.03155	0.067	7e-05
YDL053C	PBP4		0.8832	0.136	0.89432	0.093	-0.00332	0.136	0.00099
YDL054C	MCH1		0.86153	0.041	0.86919	0.062	0.00545	0.041	3e-05
YDL056W	MBP1		1.19136	0.09	1.18434	0.018	0.00745	0.089	0.00012
YDL059C	RAD59		1.10336	0.142	1.09359	0.047	0.023	0.142	0.00058
YDL061C	RPS29B		0.55513	0.02	0.51104	0.069	0.04076	0.02	0.00044	status=JK
YDL062W	YDL062W		0.96243	0.09	0.94961	0.058	0.01471	0.09	0.00022
YDL065C	PEX19		0.98588	0.081	0.81579	0.099	0.16908	0.081	0.00015
YDL066W	IDP1		0.97452	0.128	0.97891	0.125	-0.02094	0.128	0.00061
YDL070W	BDF2		0.88518	0.259	0.84292	0.06	0.04401	0.258	0.00638
YDL071C	YDL071C		1.14976	0.13	1.11989	0.099	0.03983	0.129	0.00039
YDL074C	BRE1		0.54303	0.04	0.52197	0.014	0.01609	0.04	0.00011
YDL074C	BRE1		0.73135	0.051	0.49215	0.08	0.24616	0.051	9e-05
YDL076C	RXT3		0.89152	0.131	0.83678	0.11	0.04655	0.131	0.00086
YDL077C	VAM6		0.59623	0.105	0.604	0.036	-0.01641	0.105	0.00148
YDL078C	MDH3		0.76531	0.19	0.8901	0.019	-0.11294	0.19	0.00401
YDL079C	MRK1		0.95581	0.184	1.00216	0.021	-0.04667	0.183	0.0019
YDL080C	THI3		0.69521	0.023	0.85425	0.063	-0.15252	0.023	0.00037	status=JK
YDL081C	RPP1A		0.73442	0.082	0.75145	0.031	-0.01029	0.081	0.00037
YDL082W	RPL13A		0.81388	0.05	0.79256	0.041	0.01283	0.05	7e-05
YDL083C	RPS16B		0.69271	0.207	0.74379	0.081	-0.04434	0.207	0.00682
YDL085W	NDE2		1.12403	0.076	1.06279	0.025	0.06367	0.076	8e-05
YDL086W	YDL086W		1.12754	0.07	1.2104	0.032	-0.08078	0.07	7e-05
YDL088C	ASM4		1.05984	0.073	1.02161	0.034	0.03336	0.073	9e-05
YDL089W	NUR1		1.08821	0.054	1.05792	0.092	0.02139	0.053	3e-05
YDL090C	RAM1		0	0	0	0	0	0	#NUM!
YDL091C	UBX3		0.90445	0.093	1.04123	0.038	-0.12788	0.092	0.00029
YDL093W	PMT5		1.19163	0.071	1.06687	0.093	0.1041	0.071	6e-05
YDL094C	YDL094C		1.05142	0.127	0.98568	0.015	0.06432	0.126	0.00048
YDL095W	PMT1		1.01476	0.05	0.99001	0.024	0.02839	0.05	3e-05
YDL096C	YDL096C		0.92562	0.024	0.89545	0.059	0.02947	0.024	0.00022	status=JK
YDL099W	BUG1		1.15748	0.009	1.09089	0.035	0.06136	0.009	2e-05	status=JK
YDL100C	GET3		0.72861	0.072	0.79294	0.06	-0.06819	0.072	0.00026
YDL104C	QRI7		0.9795	0.077	0.82972	0.043	0.15769	0.076	0.00013
YDL106C	PHO2		1.0562	0.114	1.08678	0.035	-0.02829	0.114	0.00035
YDL109C	YDL109C		0.97494	0.05	0.94797	0.002	0.028	0.05	4e-05
YDL110C	TMA17		0.90367	0.041	0.86059	0.052	0.0263	0.041	3e-05
YDL112W	TRM3		0.84435	0.11	0.95967	0.011	-0.11861	0.11	0.0006
YDL113C	ATG20		0.96678	0.211	0.96822	0.077	-0.01075	0.211	0.00275
YDL114W	YDL114W		1.10011	0.063	1.10797	0.032	-0.00273	0.063	5e-05
YDL117W	CYK3		0.67805	0.045	0.76824	0.022	-0.082	0.045	8e-05
YDL118W	YDL118W		0.88877	0.097	0.89389	0.052	-0.00989	0.097	0.00035
YDL119C	YDL119C		0.95467	0.052	0.95089	0.044	-0.00111	0.052	4e-05
YDL121C	YDL121C		0.86513	0.052	0.89455	0.065	-0.03781	0.052	6e-05
YDL122W	UBP1		0.9851	0.092	0.96058	0.045	0.01556	0.091	0.00022
YDL123W	SNA4		0.92017	0.041	1.02445	0.05	-0.09464	0.041	0.00066	status=JK
YDL124W	YDL124W		1.08579	0.05	1.10015	0.066	-0.00632	0.05	0.00072	status=JK
YDL125C	HNT1		0.98742	0.072	0.98497	0.067	-0.00157	0.072	0.00011
YDL127W	PCL2		0.92204	0.051	0.88172	0.071	0.036	0.051	0.00103	status=JK
YDL128W	VCX1		0.9485	0.055	0.90628	0.051	0.03584	0.055	5e-05
YDL129W	YDL129W		1.1301	0.106	1.03806	0.036	0.10197	0.106	0.00023
YDL130W	RPP1B		1.00333	0.036	0.94859	0.081	0.06489	0.036	1e-05
YDL130W-A	STF1		1.23631	0.11	1.14455	0.048	0.09603	0.109	0.00019
YDL131W	LYS21		1.19324	0.085	1.11933	0.048	0.05515	0.085	0.00169	status=JK
YDL133C-A	RPL41B		1.16886	0.02	0.95306	0.008	0.21871	0.02	0.0001	status=JK
YDL133W	SRF1		0.99106	0.176	1.00605	0.01	-0.00911	0.176	0.00151
YDL134C	PPH21		1.01459	0.155	1.08484	0.026	-0.06285	0.154	0.00096
YDL134C-A	YDL134C-A		0.94081	0.143	0.96397	0.025	-0.01573	0.142	0.00094
YDL135C	RDI1		1.07447	0.082	1.03467	0.004	0.0401	0.082	0.00012
YDL136W	RPL35B		0.84242	0.169	0.97429	0.031	-0.12464	0.169	0.00216
YDL137W	ARF2		0.87284	0.13	0.90575	0.041	-0.02534	0.13	0.00089
YDL138W	RGT2		1.06001	0.106	1.07377	0.125	-0.0043	0.106	0.00027
YDL142C	CRD1		0.7829	0.05	0.83775	0.058	-0.04582	0.05	7e-05
YDL144C	YDL144C		1.079	0.195	1.0645	0.057	0.00435	0.195	0.00159
YDL146W	LDB17		0.99285	0.124	1.02315	0.115	-0.05171	0.124	0.00053
YDL149W	ATG9		0.90298	0.028	0.95969	0.028	-0.06048	0.028	0.00031	status=JK
YDL154W	MSH5		1.13106	0.105	0.97848	0.044	0.15725	0.105	0.00022
YDL155W	CLB3		1.20405	0.099	1.09439	0.045	0.10976	0.099	0.00015
YDL156W	CMR1		0.95637	0.139	0.88287	0.005	0.0757	0.139	0.00083
YDL157C	YDL157C		0.83326	0.08	0.78302	0.044	0.04938	0.08	0.00025
YDL159W	STE7		0	0	0	0	0	0	#NUM!
YDL160C	DHH1		0.00537	0.004	0.004	0.005	0.00195	0.004	0.08313
YDL161W	ENT1		1.10749	0.053	1.02582	0.005	0.08197	0.053	3e-05
YDL162C	YDL162C		1.04614	0.061	1.01796	0.09	0.03696	0.061	5e-05
YDL167C	NRP1		1.03276	0.088	0.96996	0.028	0.06814	0.088	0.00017
YDL168W	SFA1		1.11494	0.099	1.11397	0.024	-0.00081	0.099	0.00019
YDL169C	UGX2		1.01883	0.127	0.89433	0.09	0.13517	0.126	0.00052
YDL170W	UGA3		1.07875	0.113	1.10248	0.009	-0.02073	0.113	0.00032
YDL171C	GLT1		0.90504	0.083	0.94905	0.051	-0.03716	0.082	0.00021
YDL172C	YDL172C		1.07929	0.089	0.95485	0.016	0.1319	0.089	0.00016
YDL173W	PAR32		0.8984	0.051	0.89827	0.033	-0.00364	0.051	5e-05
YDL174C	DLD1		1.19374	0.012	1.1159	0.004	0.07751	0.012	3e-05	status=JK
YDL175C	AIR2		1.01642	0.102	1.00995	0.068	-0.00092	0.102	0.00028
YDL176W	YDL176W		1.04963	0.035	0.97402	0.026	0.07084	0.035	1e-05
YDL177C	YDL177C		1.00367	0.091	1.02153	0.003	-0.01622	0.091	0.0002
YDL178W	DLD2		1.23935	0.03	1.19925	0.005	0.0391	0.03	0.0002	status=JK
YDL179W	PCL9		0.97304	0.069	1.00744	0.059	-0.0397	0.069	0.0001
YDL180W	YDL180W		0.93294	0.112	0.95308	0.104	-0.00503	0.111	0.00474	status=JK
YDL181W	INH1		1.08643	0.035	1.11382	0.071	-0.01085	0.035	0.00035	status=JK
YDL182W	LYS20		1.09996	0.016	1.01764	0.106	0.0895	0.015	7e-05	status=JK
YDL183C	YDL183C		0.78422	0.306	0.87641	0.02	-0.09704	0.306	0.01444
YDL184C	RPL41A		1.04743	0.283	0.95973	0.087	0.09906	0.283	0.00511
YDL185W	VMA1		0.99417	0.158	0.9777	0.039	0.01196	0.158	0.00108
YDL186W	YDL186W		1.04998	0.06	0.99766	0.022	0.04593	0.06	5e-05
YDL187C	YDL187C		1.01406	0.047	1.05262	0.023	-0.04496	0.047	3e-05
YDL188C	PPH22		0.92651	0.092	1.02038	0.009	-0.09034	0.092	0.00027
YDL189W	RBS1		1.07034	0.037	1.04596	0.027	0.02928	0.037	1e-05
YDL190C	UFD2		0.987	0.066	0.88302	0.041	0.1014	0.066	8e-05
YDL191W	RPL35A		0.71613	0.049	0.82566	0.064	-0.12155	0.049	9e-05
YDL192W	ARF1		0.61734	0.067	0.66094	0.025	-0.03804	0.067	0.00036
YDL194W	SNF3		0.85013	0.021	0.93064	0.012	-0.08231	0.021	0.0002	status=JK
YDL197C	ASF2		0.98667	0.136	0.97106	0.026	0.01823	0.136	0.00071
YDL199C	YDL199C		1.05585	0.014	1.02504	0.019	0.03259	0.014	6e-05	status=JK
YDL200C	MGT1		0.99851	0.095	1.01589	0.017	-0.01598	0.095	0.00023
YDL201W	TRM8		1.0503	0.089	1.04799	0.101	-0.01198	0.089	0.00017
YDL203C	ACK1		1.02683	0.061	1.11402	0.041	-0.09196	0.061	6e-05
YDL204W	RTN2		0.90347	0.011	0.94233	0.002	-0.03997	0.011	5e-05	status=JK
YDL206W	YDL206W		1.00742	0.05	0.99872	0.011	0.00796	0.05	3e-05
YDL210W	UGA4		1.14551	0.066	1.18581	0.014	-0.04652	0.066	5e-05
YDL211C	YDL211C		1.09014	0.073	1.07024	0.037	0.02125	0.073	8e-05
YDL213C	NOP6		1.02115	0.055	1.04418	0.054	-0.03561	0.055	4e-05
YDL214C	PRR2		1.16297	0.027	1.13819	0.049	0.02273	0.027	0
YDL215C	GDH2		0.95569	0.093	0.91008	0.049	0.0349	0.093	0.00025
YDL216C	RRI1		0.84113	0.117	0.94088	0.014	-0.10261	0.117	0.00073
YDL218W	YDL218W		1.03146	0.091	0.97306	0.057	0.07166	0.09	0.00019
YDL219W	DTD1		0.94316	0.206	0.95861	0.079	-0.01054	0.206	0.00276
YDL222C	FMP45		0.95089	0.034	0.97811	0.011	-0.02561	0.034	1e-05
YDL223C	HBT1		1.11551	0.028	1.04649	0.071	0.06881	0.028	0.00021	status=JK
YDL224C	WHI4		1.03263	0.107	1.03841	0.066	0.00623	0.107	0.00358	status=JK
YDL226C	GCS1		1.02673	0.07	1.01035	0.007	0.01763	0.07	9e-05
YDL227C	HO		0.91661	0.002	0.89143	0.029	0.02151	0.002	0	status=JK
YDL229W	SSB1		0.72945	0.156	0.85591	0.009	-0.12639	0.156	0.00259
YDL230W	PTP1		0.91331	0.117	0.94598	0.05	-0.03206	0.117	0.00057
YDL231C	BRE4		0.99252	0.15	0.97404	0.08	0.02663	0.149	0.00093
YDL232W	OST4		0.72658	0.103	0.72413	0.004	0.00293	0.103	0.00077
YDL233W	MFG1		1.08049	0.065	1.08416	0.005	-0.00379	0.065	6e-05
YDL234C	GYP7		1.01922	0.086	0.95908	0.017	0.05387	0.086	0.00017
YDL236W	PHO13		0.88846	0.046	0.94907	0.017	-0.06455	0.046	4e-05
YDL237W	AIM6		1.06081	0.079	1.05208	0.054	0.00465	0.078	0.00011
YDL238C	GUD1		1.13733	0.06	1.11873	0.043	0.01345	0.06	4e-05
YDL239C	ADY3		0.91695	0.054	0.91104	0.057	0.00835	0.054	6e-05
YDL240W	LRG1		1.03716	0.022	0.95378	0.031	0.0857	0.022	0.00015	status=JK
YDL241W	YDL241W		1.01489	0.09	1.01935	0.024	-0.01563	0.089	0.00019
YDL242W	YDL242W		1.07284	0.094	1.08683	0.018	-0.01789	0.093	0.00018
YDL243C	AAD4		1.13109	0.085	1.10058	0.061	0.03022	0.085	0.00012
YDR001C	NTH1		0.92061	0.1	0.9581	0.003	-0.03963	0.1	0.00035
YDR003W	RCR2		1.08973	0.06	1.04502	0.012	0.04518	0.06	5e-05
YDR004W	RAD57		0.72911	0.025	0.82782	0.023	-0.11297	0.025	0.00038	status=JK
YDR005C	MAF1		1.04002	0.044	1.01476	0.022	0.02025	0.044	2e-05
YDR006C	SOK1		0.93259	0.11	0.92954	0.074	0.00255	0.109	0.00044
YDR007W	TRP1		0.98281	0.035	1.00051	0.067	-0.01308	0.035	1e-05
YDR008C	YDR008C		0.92904	0.229	1.09754	0.007	-0.16795	0.229	0.00392
YDR009W	GAL3		1.06273	0.077	1.04266	0.046	0.00976	0.077	0.00011
YDR010C	YDR010C		1.03518	0.081	1.22818	0.124	-0.16846	0.081	0.00203	status=JK
YDR011W	SNQ2		0.88365	0.215	0.99096	0.052	-0.11858	0.215	0.00378
YDR014W	RAD61		0.88559	0.159	0.89159	0.074	-0.00202	0.159	0.00155
YDR015C	YDR015C		1.01364	0.104	0.95767	0.068	0.043	0.103	0.00029
YDR018C	YDR018C		1.07335	0.041	1.0612	0.051	0.00209	0.041	2e-05
YDR019C	GCV1		1.03528	0.037	1.07744	0.017	-0.0467	0.037	0.00042	status=JK
YDR020C	DAS2		1.11357	0.033	1.09142	0.031	0.02006	0.033	1e-05
YDR022C	ATG31		1.21616	0.016	1.10557	0.024	0.10861	0.016	5e-05	status=JK
YDR024W	YDR024W		0.87957	0.027	0.78783	0.012	0.09699	0.027	0.00031	status=JK
YDR025W	RPS11A		0.86806	0.163	0.90307	0.184	-0.02572	0.163	0.00176
YDR026C	NSI1		1.09721	0.016	1.12415	0.083	-0.02541	0.016	0
YDR029W	YDR029W		1.11116	0.008	1.32475	0.042	-0.20206	0.008	2e-05	status=JK
YDR030C	RAD28		1.03294	0.057	0.97017	0.171	0.05601	0.057	5e-05
YDR031W	MIC14		1.01715	0.088	1.02839	0.091	-0.01374	0.088	0.00018
YDR032C	PST2		0.95761	0.027	0.89569	0.008	0.06258	0.027	0.00027	status=JK
YDR033W	MRH1		1.06881	0.077	0.97237	0.045	0.09008	0.076	0.0001
YDR034C	LYS14		0.37736	0.089	0.32504	0.104	0.01968	0.089	0.00345
YDR035W	ARO3		1.03405	0.043	0.92881	0.073	0.11891	0.043	2e-05
YDR036C	EHD3		0.90975	0.033	1.05525	0.139	-0.10888	0.033	1e-05
YDR042C	YDR042C		1.11705	0.101	1.31338	0.014	-0.19417	0.101	0.0002
YDR043C	NRG1		1.09001	0.076	1.01758	0.184	0.12165	0.076	9e-05
YDR046C	BAP3		1.11199	0.036	1.05241	0.176	0.03372	0.036	1e-05
YDR048C	YDR048C		1.02754	0.148	1.06478	0.027	-0.04026	0.147	0.0008
YDR049W	VMS1		0.73336	0.387	0.95792	0.065	-0.22125	0.386	0.03214
YDR051C	DET1		0.83024	0.172	0.89857	0.021	-0.06902	0.172	0.00238
YDR055W	PST1		1.03143	0.058	1.07015	0.049	-0.03342	0.058	5e-05
YDR056C	YDR056C		1.04968	0.065	1.06292	0.019	-0.00848	0.064	6e-05
YDR057W	YOS9		1.21364	0.055	1.15269	0.018	0.0615	0.055	3e-05
YDR058C	TGL2		0.81954	0.159	0.81199	0.073	-0.01687	0.158	0.00194
YDR059C	UBC5		1.2987	0.058	1.22642	0.043	0.07799	0.058	2e-05
YDR061W	YDR061W		1.07071	0.032	1.08736	0.028	-0.01978	0.032	0.0003	status=JK
YDR063W	AIM7		0.97415	0.139	0.98323	0.023	-0.01781	0.138	0.00078
YDR066C	RTR2		1.11465	0.144	1.16868	0.03	-0.05785	0.143	0.00058
YDR067C	OCA6		1.15968	0.088	0.99708	0.047	0.15727	0.088	0.00012
YDR068W	DOS2		0.97768	0.308	0.9886	0.104	-0.00644	0.307	0.00787
YDR070C	FMP16		0.98972	0.173	0.96138	0.036	0.0194	0.172	0.00143
YDR071C	PAA1		0.72145	0.073	0.67923	0.027	0.04465	0.072	0.00028
YDR072C	IPT1		1.1492	0.018	1.02016	0.052	0.13231	0.018	9e-05	status=JK
YDR073W	SNF11		1.28615	0.094	1.21363	0.036	0.07622	0.094	0.00011
YDR074W	TPS2		1.00493	0.027	0.94822	0.041	0.05914	0.027	1e-05
YDR075W	PPH3		1.10189	0.081	1.05657	0.017	0.04281	0.081	0.00011
YDR076W	RAD55		0.69529	0.068	0.65889	0.06	0.02611	0.068	0.00026
YDR077W	SED1		1.02136	0.061	1.01056	0.026	0.00727	0.061	6e-05
YDR080W	VPS41		0.75246	0.013	0.74106	0.051	0.00332	0.013	9e-05	status=JK
YDR083W	RRP8		0.69587	0.065	0.76929	0.011	-0.07208	0.064	0.00022
YDR084C	TVP23		1.07573	0.091	1.06023	0.008	0.01002	0.091	0.00017
YDR085C	AFR1		1.16864	0.041	1.1572	0.077	0.0056	0.041	0.00042	status=JK
YDR089W	YDR089W		1.04118	0.106	1.06106	0.043	-0.01592	0.106	0.00029
YDR090C	YDR090C		1.18961	0.068	1.16462	0.022	0.02751	0.067	5e-05
YDR092W	UBC13		0.85156	0.127	0.78087	0.007	0.07078	0.126	0.00089
YDR093W	DNF2		1.02676	0.103	1.01382	0.007	0.01416	0.103	0.00027
YDR094W	YDR094W		0.86059	0.115	0.83723	0.009	0.02463	0.114	0.00064
YDR095C	YDR095C		1.10188	0.052	1.03842	0.058	0.05208	0.052	3e-05
YDR096W	GIS1		1.07526	0.053	1.10523	0.03	-0.03495	0.053	3e-05
YDR097C	MSH6		0.93766	0.05	0.85644	0.06	0.06666	0.05	4e-05
YDR098C	GRX3		1.12426	0.027	1.10103	0.008	0.02232	0.027	0
YDR099W	BMH2		0.9045	0.054	0.84493	0.011	0.06251	0.054	6e-05
YDR100W	TVP15		1.04151	0.068	1.04641	0.031	-0.01095	0.067	8e-05
YDR101C	ARX1		0.77521	0.062	0.79997	0.005	-0.02597	0.062	0.00014
YDR102C	YDR102C		0.97485	0.09	1.02694	0.003	-0.05265	0.089	0.00021
YDR103W	STE5		0.00209	0.003	0.00852	0.008	-0.0054	0.003	0.35584	status=JK
YDR104C	SPO71		1.01034	0.122	1.0476	0.056	-0.03944	0.122	0.00048
YDR105C	TMS1		1.09671	0.108	1.05669	0.04	0.0428	0.108	0.00026
YDR107C	TMN2		1.04865	0.094	1.03428	0.024	0.00916	0.093	0.00019
YDR108W	TRS85		0.99498	0.035	0.98674	0.043	0.0076	0.035	0.00042	status=JK
YDR109C	YDR109C		1.05471	0.122	1.25673	0.054	-0.18053	0.122	0.00042
YDR110W	FOB1		1.19468	0.038	1.15365	0.101	0.04441	0.038	1e-05
YDR111C	ALT2		0.98796	0.232	1.02181	0.076	-0.04865	0.231	0.0034
YDR112W	YDR112W		1.02963	0.139	1.05886	0.052	-0.03091	0.138	0.00066
YDR116C	MRPL1		0.75096	0.072	0.60627	0.012	0.1456	0.072	0.00024
YDR117C	TMA64		1.04243	0.033	1.03721	0.045	-0.00532	0.033	1e-05
YDR119W	VBA4		1.03178	0.074	1.01923	0.036	0.01	0.074	0.0001
YDR120C	TRM1		1.01577	0.147	1.11865	0.037	-0.10765	0.146	0.00081
YDR121W	DPB4		1.11519	0.105	1.08168	0.005	0.02918	0.105	0.00023
YDR122W	KIN1		1.12568	0.046	1.12317	0.002	0.00112	0.046	2e-05
YDR123C	INO2		0.72094	0.018	0.7085	0.013	0.01212	0.018	0.00021	status=JK
YDR124W	YDR124W		1.01818	0.117	1.12388	0.026	-0.11963	0.117	0.00042
YDR125C	ECM18		0.98492	0.112	1.00271	0.075	-0.03272	0.112	0.0004
YDR126W	SWF1		0.80663	0.142	0.77962	0.043	0.0326	0.142	0.00147
YDR127W	ARO1		0.98619	0.094	0.84824	0.034	0.13096	0.093	0.00023
YDR128W	MTC5		0.691	0.076	0.62952	0.027	0.06138	0.075	0.00036
YDR130C	FIN1		0.97554	0.103	1.0071	0.028	-0.03367	0.103	0.00032
YDR131C	YDR131C		1.04763	0.012	1.02703	0.011	0.01609	0.012	4e-05	status=JK
YDR132C	YDR132C		0.92562	0.042	0.90387	0.017	0.02112	0.042	2e-05
YDR133C	YDR133C		1.18595	0.018	1.13175	0.058	0.06687	0.018	7e-05	status=JK
YDR134C	YDR134C		1.05714	0.122	1.02406	0.073	0.01387	0.122	0.00042
YDR135C	YCF1		1.09652	0.054	1.04154	0.087	0.05971	0.054	3e-05
YDR139C	RUB1		0.90052	0.089	0.93672	0.084	-0.04115	0.089	0.00027
YDR142C	PEX7		0.91194	0.154	0.95702	0.024	-0.04717	0.154	0.0013
YDR143C	SAN1		1.34521	0.203	1.2687	0.074	0.07582	0.203	0.00093
YDR144C	MKC7		0.89664	0.022	0.90131	0.043	0.00262	0.022	0.00021	status=JK
YDR146C	SWI5		1.07988	0.119	1.08048	0.034	-0.0021	0.118	0.00036
YDR147W	EKI1		0.96424	0.027	0.94966	0.032	0.00396	0.027	1e-05
YDR148C	KGD2		0.88964	0.068	0.90364	0.133	-0.0108	0.068	0.00012
YDR149C	YDR149C		0.90196	0.114	0.90314	0.067	0.00687	0.114	0.00055
YDR150W	NUM1		0.85326	0.147	0.82664	0.126	0.01866	0.147	0.00138
YDR151C	CTH1		1.04444	0.074	1.03235	0.012	0.01413	0.073	0.0001
YDR152W	GIR2		1.15571	0.075	1.1655	0.054	-0.01808	0.075	8e-05
YDR153C	ENT5		1.06042	0.023	1.02247	0.017	0.03113	0.023	0.00016	status=JK
YDR154C	YDR154C		1.03325	0.038	0.96722	0.073	0.06896	0.038	0.00044	status=JK
YDR155C	CPR1		1.07398	0.105	1.08201	0.052	-0.00771	0.105	0.00025
YDR156W	RPA14		0.93426	0.119	0.94824	0.086	-0.01765	0.119	0.00057
YDR157W	YDR157W		1.07224	0.149	1.06526	0.086	0.0275	0.149	0.00073
YDR158W	HOM2		0.7254	0.049	0.83719	0.009	-0.1182	0.049	9e-05
YDR159W	SAC3		0.56381	0.191	0.52497	0.03	0.04048	0.191	0.00969
YDR161W	YDR161W		0.95982	0.099	0.80959	0.038	0.15089	0.098	0.0003
YDR162C	NBP2		0.90909	0.129	0.90041	0.037	-0.00011	0.129	0.00077
YDR163W	CWC15		0.9167	0.057	1.16779	0.005	-0.25533	0.057	7e-05
YDR165W	TRM82		0.69238	0.133	0.89028	0.034	-0.18902	0.133	0.01212	status=JK
YDR169C	STB3		1.10442	0.061	1.05529	0.123	0.05276	0.061	0.00103	status=JK
YDR171W	HSP42		0.97586	0.075	1.07896	0.095	-0.10955	0.075	0.00013
YDR173C	ARG82		0.48453	0.103	0.3765	0.005	0.10911	0.103	0.00257
YDR174W	HMO1		0.60976	0.14	0.61395	0.113	-0.00231	0.14	0.0032
YDR178W	SDH4		1.02986	0.008	0.98128	0.078	0.05977	0.008	2e-05	status=JK
YDR179C	CSN9		1.20697	0.179	1.0212	0.066	0.18145	0.179	0.00088
YDR179W-A	YDR179W-A		0.77377	0.056	1.04362	0.077	-0.26918	0.056	0.00176	status=JK
YDR181C	SAS4		1.00643	0.072	1.07297	0.035	-0.061	0.072	0.0001
YDR183W	PLP1		0.93311	0.062	0.93855	0.042	-0.00545	0.062	8e-05
YDR184C	ATC1		0.78506	0.123	0.85749	0.039	-0.07988	0.123	0.00104
YDR185C	UPS3		1.105	0.055	1.00392	0.014	0.1013	0.055	3e-05
YDR186C	YDR186C		1.00314	0.086	1.02567	0.029	-0.0277	0.086	0.00017
YDR191W	HST4		0.60851	0.108	0.71151	0.02	-0.09829	0.108	0.00149
YDR192C	NUP42		1.10824	0.031	1.09142	0.067	0.01907	0.031	1e-05
YDR193W	YDR193W		1.09662	0.017	1.01336	0.006	0.08277	0.017	8e-05	status=JK
YDR198C	RKM2		1.13856	0.082	1.07448	0.018	0.06146	0.081	0.0001
YDR199W	YDR199W		1.12845	0.079	1.14961	0.031	-0.01812	0.079	9e-05
YDR202C	RAV2		0.9021	0.101	0.88978	0.052	0.01244	0.101	0.00039
YDR203W	YDR203W		0.90967	0.076	0.99886	0.021	-0.0883	0.076	0.00016
YDR205W	MSC2		0.9815	0.034	0.93306	0.08	0.04278	0.034	1e-05
YDR206W	EBS1		1.06055	0.055	1.04494	0.006	0.01665	0.055	4e-05
YDR207C	UME6		0.5389	0.056	0.62075	0.026	-0.08293	0.056	0.00031
YDR209C	YDR209C		0.98083	0.027	0.98426	0.032	0.00403	0.027	1e-05
YDR210W	YDR210W		1.11192	0.072	1.13318	0.01	-0.02265	0.072	7e-05
YDR213W	UPC2		1.01725	0.02	0.99118	0.039	0.02946	0.02	0
YDR214W	AHA1		1.14709	0.024	1.10262	0.006	0.0431	0.024	0
YDR215C	YDR215C		1.11235	0.077	1.18651	0.038	-0.07386	0.077	9e-05
YDR216W	ADR1		1.03463	0.02	1.02843	0.018	0.0084	0.02	0
YDR217C	RAD9		0.95774	0.15	1.02716	0.021	-0.08235	0.15	0.00104
YDR218C	SPR28		1.00679	0.08	0.97869	0.049	0.02017	0.079	0.00014
YDR219C	MFB1		0.82825	0.064	0.88764	0.053	-0.04941	0.064	0.00013
YDR220C	YDR220C		1.11049	0.006	1.09651	0.032	0.01143	0.006	1e-05	status=JK
YDR221W	GTB1		1.14406	0.036	1.11636	0.025	0.03243	0.036	1e-05
YDR222W	YDR222W		0.95927	0.029	1.00507	0.055	-0.04169	0.029	1e-05
YDR223W	CRF1		1.02429	0.015	1.05025	0.059	-0.00817	0.015	7e-05	status=JK
YDR225W	HTA1		0.77959	0.146	0.85212	0.016	-0.06897	0.146	0.00177
YDR227W	SIR4		0	0	0	0	0	0	#NUM!	status=JK
YDR229W	IVY1		1.01669	0.075	1.06661	0.038	-0.06055	0.075	0.00011
YDR233C	RTN1		0.97534	0.082	1.03359	0.04	-0.05294	0.081	0.00016
YDR234W	LYS4		0.26603	0.066	0.33621	0.003	-0.0691	0.066	0.00406
YDR239C	YDR239C		0.93705	0.065	0.97386	0.058	-0.03404	0.065	9e-05
YDR241W	YDR241W		0.87119	0.135	0.81404	0.049	0.06092	0.135	0.00101
YDR242W	AMD2		1.12115	0.011	0.95335	0.284	0.10253	0.011	3e-05	status=JK
YDR244W	PEX5		0.84468	0.168	0.80834	0.098	0.02031	0.168	0.0021
YDR245W	MNN10		0.922	0.008	0.97221	0.064	-0.0642	0.008	2e-05	status=JK
YDR247W	VHS1		0.99034	0.036	1.00872	0.071	-0.02449	0.036	1e-05
YDR248C	YDR248C		1.03025	0.086	1.09776	0.013	-0.0747	0.086	0.00016
YDR249C	YDR249C		1.07104	0.241	1.07093	0.03	-0.00804	0.24	0.00299
YDR250C	YDR250C		0.97797	0.178	1.06835	0.007	-0.09464	0.178	0.00162
YDR251W	PAM1		1.05175	0.066	1.04112	0.04	0.00861	0.066	7e-05
YDR252W	BTT1		1.06967	0.102	1.08432	0.019	-0.01263	0.102	0.00024
YDR253C	MET32		0.86905	0.063	0.8699	0.053	-0.01259	0.063	0.0001
YDR254W	CHL4		1.02319	0.125	1.04582	0.085	-0.03217	0.125	0.0005
YDR255C	RMD5		1.08272	0.036	1.04902	0.043	0.03463	0.036	1e-05
YDR256C	CTA1		1.17212	0.01	1.09725	0.05	0.06268	0.01	2e-05	status=JK
YDR257C	RKM4		0.95941	0.126	0.92836	0.007	0.03217	0.125	0.00061
YDR258C	HSP78		1.13258	0.081	1.05057	0.057	0.07602	0.081	0.0001
YDR259C	YAP6		1.16753	0.117	1.09973	0.123	0.03654	0.116	0.00027
YDR260C	SWM1		1.00773	0.099	1.02732	0.098	-0.00462	0.099	0.00026
YDR261C	EXG2		1.04218	0.102	1.00277	0.024	0.02511	0.102	0.00026
YDR262W	YDR262W		1.06242	0.031	1.05436	0.045	0.01208	0.031	1e-05
YDR263C	DIN7		0.89186	0.095	0.91192	0.028	-0.02581	0.095	0.00033
YDR265W	PEX10		0.95726	0.094	0.93032	0.07	0.01891	0.094	0.00026
YDR266C	HEL2		1.0328	0.089	1.05016	0.057	-0.02202	0.089	0.00018
YDR269C	YDR269C		1.02325	0.063	1.06978	0.178	-0.02667	0.063	6e-05
YDR270W	CCC2		1.14706	0.082	1.09033	0.015	0.05915	0.082	0.0001
YDR271C	YDR271C		1.08155	0.038	1.04254	0.18	-0.02313	0.038	0.00041	status=JK
YDR272W	GLO2		0.96254	0.072	1.00018	0.011	-0.03774	0.072	0.00011
YDR273W	DON1		1.05454	0.16	1.04807	0.06	0.00753	0.16	0.00095
YDR274C	YDR274C		1.1232	0.112	1.07773	0.061	0.0445	0.112	0.00027
YDR275W	BSC2		1.05494	0.089	1.06295	0.009	-0.01224	0.088	0.00016
YDR276C	PMP3		1.03677	0.066	0.80646	0.017	0.22398	0.066	7e-05
YDR277C	MTH1		1.11234	0.146	1.01065	0.07	0.11337	0.146	0.00061
YDR278C	YDR278C		0.80211	0.084	0.71964	0.04	0.08307	0.084	0.00031
YDR279W	RNH202		0.9477	0.076	0.88376	0.078	0.03977	0.076	0.00014
YDR281C	PHM6		1.02326	0.102	1.01164	0.024	0.00476	0.101	0.00027
YDR282C	YDR282C		1.22625	0.06	1.13203	0.021	0.09217	0.06	3e-05
YDR284C	DPP1		1.02597	0.15	0.97578	0.024	0.05397	0.149	0.00084
YDR285W	ZIP1		1.09141	0.141	1.07291	0.041	0.01617	0.141	0.00059
YDR286C	YDR286C		0.90451	0.055	0.96856	0.063	-0.06939	0.055	6e-05
YDR287W	INM2		0.93181	0.171	1.02264	0.038	-0.08083	0.171	0.00165
YDR289C	RTT103		0.69046	0.038	0.68406	0.066	-0.0044	0.038	0.001	status=JK
YDR290W	YDR290W		0.6717	0.011	0.682	0.23	0.01591	0.011	9e-05	status=JK
YDR291W	HRQ1		0.97062	0.133	1.0442	0.012	-0.08051	0.132	0.00069
YDR293C	SSD1		1.44101	0.289	1.18512	0.036	0.25067	0.288	0.00215
YDR294C	DPL1		0.97754	0.071	1.03927	0.089	-0.07497	0.071	0.00011
YDR297W	SUR2		0.92033	0.053	0.84517	0.055	0.06509	0.053	5e-05
YDR304C	CPR5		0.9324	0.203	0.99493	0.079	-0.08012	0.203	0.00273
YDR305C	HNT2		1.06011	0.192	0.98272	0.072	0.06837	0.192	0.00159
YDR306C	YDR306C		0.93443	0.011	0.91136	0.031	0.02044	0.011	0
YDR307W	PMT7		0.97298	0.05	0.95029	0.069	0.03925	0.049	4e-05
YDR309C	GIC2		0.97859	0.022	0.9732	0.036	0.00776	0.022	0.00018	status=JK
YDR310C	SUM1		1.08772	0.09	1.06025	0.095	0.01105	0.09	0.00016
YDR312W	SSF2		1.15068	0.074	1.10341	0.026	0.0484	0.073	7e-05
YDR313C	PIB1		1.02659	0.053	1.00038	0.023	0.02885	0.053	4e-05
YDR314C	RAD34		1.13016	0.113	1.12961	0.091	-0.01982	0.113	0.00027
YDR315C	IPK1		0.9199	0.082	0.96763	0.01	-0.04812	0.082	0.00019
YDR316W	OMS1		0.84324	0.087	0.86572	0.027	-0.0214	0.087	0.0003
YDR317W	HIM1		1.00563	0.022	1.08172	0.041	-0.08048	0.022	0.00015	status=JK
YDR318W	MCM21		0.99464	0.11	0.91307	0.024	0.08485	0.11	0.00037
YDR319C	YFT2		1.0848	0.048	0.9751	0.046	0.09389	0.047	0.00064	status=JK
YDR320C	SWA2		0.931	0.038	0.89575	0.034	0.03956	0.038	2e-05
YDR321W	ASP1		1.0929	0.108	1.11913	0.101	-0.03374	0.108	0.00026
YDR326C	YSP2		1.1731	0.044	1.11704	0.186	0.09205	0.044	1e-05
YDR329C	PEX3		0.90159	0.065	0.88849	0.034	0.00747	0.065	0.0001
YDR330W	UBX5		1.16561	0.013	1.15851	0.02	0.00415	0.013	4e-05	status=JK
YDR332W	IRC3		0.99086	0.053	0.97349	0.02	0.01732	0.053	4e-05
YDR333C	YDR333C		1.0189	0.026	1.05171	0.023	-0.03767	0.026	0
YDR334W	SWR1		0.74767	0.014	0.7599	0.07	-0.03283	0.014	0.00012	status=JK
YDR335W	MSN5		0.77318	0.089	0.85317	0.06	-0.08436	0.089	0.00042
YDR336W	YDR336W		0.82993	0.067	0.74119	0.044	0.09148	0.067	0.00015
YDR338C	YDR338C		0.99398	0.064	1.03107	0.01	-0.03509	0.064	7e-05
YDR340W	YDR340W		1.08938	0.119	1.07934	0.074	0.00794	0.119	0.00036
YDR344C	YDR344C		1.0651	0.063	0.97772	0.007	0.08363	0.063	6e-05
YDR345C	HXT3		0.9814	0.046	0.96136	0.041	0.00602	0.046	3e-05
YDR346C	SVF1		1.01191	0.032	0.99061	0.02	0.01741	0.032	1e-05
YDR348C	PAL1		0.90031	0.036	0.87117	0.022	0.02725	0.036	2e-05
YDR349C	YPS7		0.98576	0.026	1.06399	0.032	-0.07915	0.026	0.00023	status=JK
YDR351W	SBE2		0.95368	0.089	0.93965	0.04	0.01389	0.089	0.00022
YDR352W	YPQ2		1.15188	0.029	1.17176	0.095	-0.00076	0.029	0.00021	status=JK
YDR354W	TRP4		0.95316	0.06	0.93038	0.043	0.02056	0.06	7e-05
YDR357C	CNL1		1.09805	0.095	0.9477	0.037	0.15197	0.095	0.00018
YDR358W	GGA1		1.13955	0.105	1.08469	0.01	0.05246	0.105	0.00021
YDR359C	EAF1		0.28419	0.107	0.2695	0.049	0.01243	0.107	0.01314
YDR360W	YDR360W		1.00064	0.029	0.92615	0.008	0.07625	0.029	1e-05
YDR363W	ESC2		0.8469	0.082	0.90483	0.043	-0.06455	0.082	0.00025
YDR363W-A	SEM1		1.11378	0.037	1.02168	0.036	0.08351	0.037	0.00037	status=JK
YDR368W	YPR1		0.90746	0.174	0.89729	0.065	-0.00034	0.173	0.00187
YDR369C	XRS2		1.04828	0.016	1.12737	0.021	-0.08769	0.016	8e-05	status=JK
YDR370C	YDR370C		1.01953	0.091	1.03287	0.021	-0.0116	0.091	0.0002
YDR371W	CTS2		1.01228	0.04	1.03155	0.05	-0.01755	0.04	2e-05
YDR372C	VPS74		1.04859	0.106	0.98901	0.031	0.0652	0.106	0.00029
YDR374C	YDR374C		1.13919	0.052	1.04183	0.057	0.09131	0.052	0.0007	status=JK
YDR375C	BCS1		0.76013	0.072	0.59467	0.103	0.1766	0.071	0.00023
YDR378C	LSM6		0.55301	0.05	0.5398	0.055	0.01552	0.05	0.00021
YDR379W	RGA2		1.00096	0.06	1.03577	0.007	-0.03732	0.06	6e-05
YDR380W	ARO10		0.94226	0.072	0.92268	0.036	0.02565	0.072	0.00012
YDR382W	RPP2B		1.03543	0.116	1.03866	0.135	-0.02066	0.115	0.00038
YDR383C	NKP1		0.60543	0.116	0.75697	0.039	-0.15211	0.116	0.0019
YDR384C	ATO3		0.98879	0.117	0.96398	0.094	0.01595	0.117	0.00045
YDR385W	EFT2		0.96515	0.02	1.00061	0.097	-0.04754	0.02	0.00015	status=JK
YDR386W	MUS81		0.9909	0.069	0.93564	0.049	0.05555	0.069	9e-05
YDR387C	YDR387C		1.03493	0.108	1.11202	0.024	-0.08008	0.107	0.00031
YDR388W	RVS167		0.67604	0.104	0.49907	0.007	0.17569	0.104	0.00098
YDR389W	SAC7		0.87944	0.066	0.92786	0.038	-0.03652	0.066	0.00011
YDR391C	YDR391C		1.13179	0.092	1.07866	0.038	0.0418	0.092	0.00015
YDR392W	SPT3		0.70336	0.062	0.71984	0.007	-0.01869	0.061	0.00018
YDR393W	SHE9		0.82061	0.102	0.7843	0.01	0.03239	0.102	0.00052
YDR395W	SXM1		1.00243	0.019	1.10726	0.03	-0.10301	0.019	0.00012	status=JK
YDR399W	HPT1		0.97369	0.136	0.9381	0.043	0.04498	0.136	0.00074
YDR400W	URH1		0.88125	0.146	0.95827	0.075	-0.07071	0.145	0.00122
YDR401W	YDR401W		0.97166	0.022	1.09255	0.117	-0.09125	0.021	0.00016	status=JK
YDR402C	DIT2		1.17364	0.096	1.09438	0.009	0.07855	0.096	0.00015
YDR403W	DIT1		1.04409	0.065	1.06739	0.026	-0.0179	0.065	7e-05
YDR406W	PDR15		1.06649	0.09	1.07308	0.01	-0.00322	0.09	0.00016
YDR408C	ADE8		1.08875	0.029	1.05688	0.033	0.03198	0.029	1e-05
YDR409W	SIZ1		0.97745	0.008	0.96047	0.005	0.01844	0.008	2e-05	status=JK
YDR410C	STE14		0	0	0	0	0	0	#NUM!
YDR411C	DFM1		1.09	0.089	1.07572	0.012	0.01116	0.089	0.00015
YDR414C	ERD1		0.99329	0.118	0.90019	0.006	0.09244	0.118	0.00046
YDR415C	YDR415C		0.89943	0.253	1.11673	0.025	-0.23108	0.253	0.00575
YDR419W	RAD30		1.01006	0.066	0.99213	0.047	0.01704	0.066	0.00141	status=JK
YDR420W	HKR1		0.89988	0.035	0.82795	0.047	0.08585	0.035	0.00051	status=JK
YDR421W	ARO80		0.84659	0.152	0.92324	0.103	-0.07403	0.151	0.00154
YDR422C	SIP1		1.05447	0.122	0.95092	0.051	0.10271	0.122	0.00042
YDR423C	CAD1		0.9053	0.135	0.97491	0.04	-0.06957	0.135	0.00089
YDR424C	DYN2		0.99616	0.092	0.96489	0.042	0.02943	0.092	0.00022
YDR425W	SNX41		0.80468	0.083	0.86892	0.007	-0.06182	0.082	0.0003
YDR426C	YDR426C		0.89564	0.037	0.89629	0.031	-0.00665	0.037	2e-05
YDR428C	BNA7		1.05587	0.036	0.99491	0.044	0.056	0.036	1e-05
YDR430C	CYM1		1.18197	0.035	1.14953	0.014	0.03167	0.035	1e-05
YDR431W	YDR431W		0.80174	0.119	0.82419	0.004	-0.02445	0.118	0.00087
YDR435C	PPM1		1.07316	0.017	1.19054	0.032	-0.12269	0.017	8e-05	status=JK
YDR436W	PPZ2		1.10799	0.095	1.16441	0.093	-0.06018	0.095	0.00017
YDR438W	THI74		0.97089	0.068	0.96315	0.031	0.01181	0.068	0.0001
YDR439W	LRS4		1.14546	0.047	1.18549	0.046	-0.04695	0.047	2e-05
YDR440W	DOT1		1.07379	0.006	1.02026	0.013	0.05937	0.006	1e-05	status=JK
YDR441C	APT2		0.9312	0.01	0.95948	0.08	-0.04235	0.01	4e-05	status=JK
YDR444W	YDR444W		1.10403	0.017	0.9438	0.035	0.15537	0.017	8e-05	status=JK
YDR445C	YDR445C		1.01042	0.034	1.0152	0.027	-0.00029	0.033	1e-05
YDR446W	ECM11		0.93952	0.094	1.00934	0.004	-0.07087	0.093	0.00027
YDR447C	RPS17B		1.09973	0.019	1.07251	0.015	0.03156	0.019	0.0001	status=JK
YDR451C	YHP1		1.02091	0.072	0.97974	0.011	0.03948	0.071	9e-05
YDR452W	PPN1		1.2308	0.016	1.16812	0.01	0.06137	0.016	6e-05	status=JK
YDR453C	TSA2		1.05627	0.004	0.95764	0.07	0.07812	0.004	0	status=JK
YDR455C	YDR455C		0.97388	0.059	0.90773	0.001	0.06686	0.059	6e-05
YDR458C	HEH2		1.06048	0.064	1.0699	0.047	-0.01687	0.064	6e-05
YDR459C	PFA5		0.93526	0.079	0.90973	0.037	0.03404	0.078	0.00016
YDR461W	MFA1		0.74851	0.067	0.92567	0.074	-0.14007	0.067	0.00269	status=JK
YDR463W	STP1		0.97669	0.102	1.01203	0.038	-0.04074	0.102	0.00031
YDR465C	RMT2		1.01995	0.022	1.14825	0.012	-0.13301	0.022	0.00016	status=JK
YDR466W	PKH3		0.93781	0.017	0.98207	0.017	-0.0461	0.017	0.00011	status=JK
YDR467C	YDR467C		1.10942	0.031	1.11481	0.06	0.00188	0.031	1e-05
YDR469W	SDC1		0.89279	0.032	0.90711	0.016	-0.01874	0.032	0.00044	status=JK
YDR471W	RPL27B		0.63942	0.013	0.85864	0.008	-0.2143	0.013	0.00015	status=JK
YDR474C	YDR474C		1.00929	0.017	1.04068	0.026	-0.03387	0.017	0.0001	status=JK
YDR475C	JIP4		0.95615	0.051	0.94458	0.014	0.01701	0.051	4e-05
YDR476C	YDR476C		0.89516	0.12	0.99683	0.022	-0.09918	0.12	0.00065
YDR477W	SNF1		0.90458	0.106	0.88091	0.17	0.04373	0.106	0.00044
YDR479C	PEX29		0.99574	0.097	0.98732	0.025	0.01284	0.097	0.00025
YDR480W	DIG2		1.19023	0.032	1.16525	0.059	0.0197	0.032	0.00025	status=JK
YDR481C	PHO8		1.08409	0.062	1.03618	0.052	0.04359	0.061	5e-05
YDR482C	CWC21		1.06349	0.123	1.0902	0.01	-0.02678	0.123	0.00042
YDR483W	KRE2		0.9133	0.028	0.9454	0.052	-0.01964	0.028	0.00031	status=JK
YDR483W	KRE2		0.96991	0.124	1.00591	0.065	-0.03274	0.124	0.00057
YDR485C	VPS72		0.89573	0.037	0.77954	0.048	0.11242	0.037	0.00057	status=JK
YDR486C	VPS60		0.95878	0.052	0.92723	0.003	0.03178	0.052	4e-05
YDR488C	PAC11		0.92068	0.066	0.94667	0.018	-0.02156	0.066	0.0001
YDR490C	PKH1		1.11587	0.174	1.18886	0.039	-0.06669	0.173	0.00102
YDR491C	YDR491C		0.97524	0.072	1.02264	0.046	-0.05138	0.072	0.00011
YDR492W	IZH1		1.1157	0.125	1.09899	0.051	0.00846	0.125	0.00038
YDR493W	MZM1		1.07668	0.138	1.08086	0.061	-0.01431	0.138	0.00058
YDR494W	RSM28		1.12382	0.069	1.13583	0.024	-0.01729	0.069	6e-05
YDR496C	PUF6		0.71007	0.032	0.78838	0.055	-0.09289	0.032	3e-05
YDR497C	ITR1		1.0671	0.1	1.07071	0.045	-0.00342	0.099	0.00022
YDR500C	RPL37B		0	0	0	0	0	0	#NUM!
YDR501W	PLM2		1.28443	0.092	1.2072	0.056	0.06579	0.091	0.0001
YDR502C	SAM2		0.98688	0.018	1.03936	0.169	-0.00896	0.018	0
YDR503C	LPP1		1.06887	0.11	1.07952	0.007	-0.01216	0.11	0.0003
YDR504C	SPG3		1.05794	0.061	1.12898	0.016	-0.07147	0.061	5e-05
YDR505C	PSP1		0.84643	0.121	0.91482	0.051	-0.07855	0.121	0.0008
YDR506C	GMC1		0.95298	0.134	0.91021	0.037	0.0421	0.133	0.00075
YDR508C	GNP1		1.01481	0.101	1.06542	0.111	-0.06191	0.101	0.00027
YDR509W	YDR509W		0.9818	0.057	0.98179	0.035	-0.00755	0.057	5e-05
YDR511W	ACN9		1.09466	0.115	1.0276	0.053	0.05859	0.115	0.00032
YDR512C	EMI1		0.75279	0.012	0.64448	0.011	0.1065	0.012	8e-05	status=JK
YDR513W	GRX2		0.97004	0.072	1.00948	0.026	-0.03531	0.072	0.00011
YDR514C	YDR514C		0.70865	0.22	0.74994	0.136	-0.06898	0.22	0.0076
YDR515W	SLF1		1.07009	0.073	1.02111	0.053	0.04984	0.073	9e-05
YDR516C	EMI2		1.08057	0.103	1.12404	0.084	-0.03172	0.103	0.00024
YDR517W	GRH1		1.08407	0.082	1.06372	0.055	0.00959	0.082	0.00012
YDR519W	FPR2		1.05238	0.096	1.05534	0.091	0.02525	0.096	0.00021
YDR520C	URC2		1.13618	0.138	1.05153	0.134	0.06643	0.138	0.00049
YDR522C	SPS2		0.94228	0.14	0.935	0.074	0.01106	0.14	0.00089
YDR524C	AGE1		0.97994	0.154	0.95031	0.011	0.02566	0.154	0.00104
YDR525W	YDR525W		0.95348	0.147	1.07365	0.02	-0.118	0.147	0.00099
YDR525W-A	SNA2		0.93702	0.037	0.96687	0.027	-0.02804	0.037	0.00053	status=JK
YDR528W	HLR1		1.04552	0.081	1.00192	0.064	0.03279	0.08	0.00013
YDR530C	APA2		1.06599	0.046	1.02673	0.016	0.04173	0.046	0.00062	status=JK
YDR532C	KRE28		0.14017	0.052	0.14509	0.02	-0.00175	0.051	0.04221	status=JK
YDR533C	HSP31		0.97921	0.082	0.89456	0.048	0.0787	0.081	0.00016
YDR534C	FIT1		1.05698	0.141	1.06423	0.036	-0.0046	0.141	0.00065
YDR535C	YDR535C		0.90798	0.043	1.04145	0.003	-0.13234	0.043	0.00074	status=JK
YDR536W	STL1		0.96896	0.012	1.04186	0.067	-0.07307	0.012	5e-05	status=JK
YDR537C	YDR537C		0.94497	0.175	0.97407	0.034	-0.01196	0.175	0.0017
YDR538W	PAD1		0.45492	0.059	0.52949	0.036	-0.06818	0.059	0.00058
YDR539W	FDC1		0.84699	0.227	0.91024	0.049	-0.06268	0.227	0.005
YDR540C	IRC4		1.04767	0.028	1.03945	0.062	0.01074	0.027	0.00023	status=JK
YDR541C	YDR541C		1.05408	0.219	0.95601	0.074	0.11322	0.218	0.00236
YEL001C	IRC22		#NUM!	#NUM!	#NUM!	#NUM!	#NUM!	#NUM!	#NUM!	status=LK
YEL003W	GIM4		#NUM!	#NUM!	#NUM!	#NUM!	#NUM!	#NUM!	#NUM!	status=LK
YEL004W	YEA4		#NUM!	#NUM!	#NUM!	#NUM!	#NUM!	#NUM!	#NUM!	status=LK
YEL005C	VAB2		#NUM!	#NUM!	#NUM!	#NUM!	#NUM!	#NUM!	#NUM!	status=LK
YEL006W	YEA6		#NUM!	#NUM!	#NUM!	#NUM!	#NUM!	#NUM!	#NUM!	status=LK
YEL007W	MIT1		#NUM!	#NUM!	#NUM!	#NUM!	#NUM!	#NUM!	#NUM!	status=LK
YEL008W	YEL008W		#NUM!	#NUM!	#NUM!	#NUM!	#NUM!	#NUM!	#NUM!	status=LK
YEL010W	YEL010W		#NUM!	#NUM!	#NUM!	#NUM!	#NUM!	#NUM!	#NUM!	status=LK
YEL011W	GLC3		#NUM!	#NUM!	#NUM!	#NUM!	#NUM!	#NUM!	#NUM!	status=LK
YEL012W	UBC8		#NUM!	#NUM!	#NUM!	#NUM!	#NUM!	#NUM!	#NUM!	status=LK
YEL013W	VAC8		#NUM!	#NUM!	#NUM!	#NUM!	#NUM!	#NUM!	#NUM!	status=LK
YEL014C	YEL014C		#NUM!	#NUM!	#NUM!	#NUM!	#NUM!	#NUM!	#NUM!	status=LK
YEL015W	EDC3		#NUM!	#NUM!	#NUM!	#NUM!	#NUM!	#NUM!	#NUM!	status=LK
YEL016C	NPP2		#NUM!	#NUM!	#NUM!	#NUM!	#NUM!	#NUM!	#NUM!	status=LK
YEL017C-A	PMP2		#NUM!	#NUM!	#NUM!	#NUM!	#NUM!	#NUM!	#NUM!	status=LK
YEL017W	GTT3		#NUM!	#NUM!	#NUM!	#NUM!	#NUM!	#NUM!	#NUM!	status=LK
YEL020C	YEL020C		#NUM!	#NUM!	#NUM!	#NUM!	#NUM!	#NUM!	#NUM!	status=LK
YEL023C	YEL023C		#NUM!	#NUM!	#NUM!	#NUM!	#NUM!	#NUM!	#NUM!	status=LK
YEL025C	YEL025C		#NUM!	#NUM!	#NUM!	#NUM!	#NUM!	#NUM!	#NUM!	status=LK
YEL028W	YEL028W		#NUM!	#NUM!	#NUM!	#NUM!	#NUM!	#NUM!	#NUM!	status=LK
YEL030W	ECM10		#NUM!	#NUM!	#NUM!	#NUM!	#NUM!	#NUM!	#NUM!	status=LK
YEL031W	SPF1		#NUM!	#NUM!	#NUM!	#NUM!	#NUM!	#NUM!	#NUM!	status=LK
YEL033W	MTC7		#NUM!	#NUM!	#NUM!	#NUM!	#NUM!	#NUM!	#NUM!	status=LK
YEL037C	RAD23		#NUM!	#NUM!	#NUM!	#NUM!	#NUM!	#NUM!	#NUM!	status=LK
YEL038W	UTR4		#NUM!	#NUM!	#NUM!	#NUM!	#NUM!	#NUM!	#NUM!	status=LK
YEL039C	CYC7		#NUM!	#NUM!	#NUM!	#NUM!	#NUM!	#NUM!	#NUM!	status=LK
YEL040W	UTR2		#NUM!	#NUM!	#NUM!	#NUM!	#NUM!	#NUM!	#NUM!	status=LK
YEL041W	YEF1		#NUM!	#NUM!	#NUM!	#NUM!	#NUM!	#NUM!	#NUM!	status=LK
YEL042W	GDA1		#NUM!	#NUM!	#NUM!	#NUM!	#NUM!	#NUM!	#NUM!	status=LK
YEL043W	YEL043W		#NUM!	#NUM!	#NUM!	#NUM!	#NUM!	#NUM!	#NUM!	status=LK
YEL047C	FRD1		#NUM!	#NUM!	#NUM!	#NUM!	#NUM!	#NUM!	#NUM!	status=LK
YEL048C	TCA17		#NUM!	#NUM!	#NUM!	#NUM!	#NUM!	#NUM!	#NUM!	status=LK
YEL049W	PAU2		#NUM!	#NUM!	#NUM!	#NUM!	#NUM!	#NUM!	#NUM!	status=LK
YEL052W	AFG1		#NUM!	#NUM!	#NUM!	#NUM!	#NUM!	#NUM!	#NUM!	status=LK
YEL053C	MAK10		#NUM!	#NUM!	#NUM!	#NUM!	#NUM!	#NUM!	#NUM!	status=LK
YEL056W	HAT2		#NUM!	#NUM!	#NUM!	#NUM!	#NUM!	#NUM!	#NUM!	status=LK
YEL057C	YEL057C		#NUM!	#NUM!	#NUM!	#NUM!	#NUM!	#NUM!	#NUM!	status=LK
YEL059W	YEL059W		#NUM!	#NUM!	#NUM!	#NUM!	#NUM!	#NUM!	#NUM!	status=LK
YEL060C	PRB1		#NUM!	#NUM!	#NUM!	#NUM!	#NUM!	#NUM!	#NUM!	status=LK
YEL061C	CIN8		#NUM!	#NUM!	#NUM!	#NUM!	#NUM!	#NUM!	#NUM!	status=LK
YEL062W	NPR2		#NUM!	#NUM!	#NUM!	#NUM!	#NUM!	#NUM!	#NUM!	status=LK
YEL063C	CAN1		#NUM!	#NUM!	#NUM!	#NUM!	#NUM!	#NUM!	#NUM!	status=LK
YEL064C	AVT2		#NUM!	#NUM!	#NUM!	#NUM!	#NUM!	#NUM!	#NUM!	status=LK
YEL065W	SIT1		#NUM!	#NUM!	#NUM!	#NUM!	#NUM!	#NUM!	#NUM!	status=LK
YEL066W	HPA3		#NUM!	#NUM!	#NUM!	#NUM!	#NUM!	#NUM!	#NUM!	status=LK
YEL067C	YEL067C		#NUM!	#NUM!	#NUM!	#NUM!	#NUM!	#NUM!	#NUM!	status=LK
YEL068C	YEL068C		#NUM!	#NUM!	#NUM!	#NUM!	#NUM!	#NUM!	#NUM!	status=LK
YEL071W	DLD3		#NUM!	#NUM!	#NUM!	#NUM!	#NUM!	#NUM!	#NUM!	status=LK
YER001W	MNN1		#NUM!	#NUM!	#NUM!	#NUM!	#NUM!	#NUM!	#NUM!	status=LK
YER002W	NOP16		#NUM!	#NUM!	#NUM!	#NUM!	#NUM!	#NUM!	#NUM!	status=LK
YER004W	FMP52		#NUM!	#NUM!	#NUM!	#NUM!	#NUM!	#NUM!	#NUM!	status=LK
YER005W	YND1		#NUM!	#NUM!	#NUM!	#NUM!	#NUM!	#NUM!	#NUM!	status=LK
YER007C-A	TMA20		#NUM!	#NUM!	#NUM!	#NUM!	#NUM!	#NUM!	#NUM!	status=LK
YER007W	PAC2		#NUM!	#NUM!	#NUM!	#NUM!	#NUM!	#NUM!	#NUM!	status=LK
YER010C	YER010C		#NUM!	#NUM!	#NUM!	#NUM!	#NUM!	#NUM!	#NUM!	status=LK
YER011W	TIR1		#NUM!	#NUM!	#NUM!	#NUM!	#NUM!	#NUM!	#NUM!	status=LK
YER016W	BIM1		#NUM!	#NUM!	#NUM!	#NUM!	#NUM!	#NUM!	#NUM!	status=LK
YER019C-A	SBH2		#NUM!	#NUM!	#NUM!	#NUM!	#NUM!	#NUM!	#NUM!	status=LK
YER019W	ISC1		#NUM!	#NUM!	#NUM!	#NUM!	#NUM!	#NUM!	#NUM!	status=LK
YER020W	GPA2		#NUM!	#NUM!	#NUM!	#NUM!	#NUM!	#NUM!	#NUM!	status=LK
YER024W	YAT2		#NUM!	#NUM!	#NUM!	#NUM!	#NUM!	#NUM!	#NUM!	status=LK
YER027C	GAL83		#NUM!	#NUM!	#NUM!	#NUM!	#NUM!	#NUM!	#NUM!	status=LK
YER028C	MIG3		#NUM!	#NUM!	#NUM!	#NUM!	#NUM!	#NUM!	#NUM!	status=LK
YER030W	CHZ1		#NUM!	#NUM!	#NUM!	#NUM!	#NUM!	#NUM!	#NUM!	status=LK
YER031C	YPT31		#NUM!	#NUM!	#NUM!	#NUM!	#NUM!	#NUM!	#NUM!	status=LK
YER032W	FIR1		#NUM!	#NUM!	#NUM!	#NUM!	#NUM!	#NUM!	#NUM!	status=LK
YER033C	ZRG8		#NUM!	#NUM!	#NUM!	#NUM!	#NUM!	#NUM!	#NUM!	status=LK
YER034W	YER034W		#NUM!	#NUM!	#NUM!	#NUM!	#NUM!	#NUM!	#NUM!	status=LK
YER035W	EDC2		#NUM!	#NUM!	#NUM!	#NUM!	#NUM!	#NUM!	#NUM!	status=LK
YER038W-A	YER038W-A		#NUM!	#NUM!	#NUM!	#NUM!	#NUM!	#NUM!	#NUM!	status=LK
YER039C	HVG1		#NUM!	#NUM!	#NUM!	#NUM!	#NUM!	#NUM!	#NUM!	status=LK
YER039C-A	YER039C-A		#NUM!	#NUM!	#NUM!	#NUM!	#NUM!	#NUM!	#NUM!	status=LK
YER041W	YEN1		1.10419	0.043	1.06119	0.04	0.03859	0.043	2e-05
YER042W	MXR1		0.89701	0.183	0.91672	0.035	-0.02505	0.183	0.00225
YER044C-A	MEI4		0.84926	0.21	0.96151	0.047	-0.10677	0.209	0.00393
YER045C	ACA1		1.15049	0.074	1.0399	0.058	0.09854	0.074	0.00137	status=JK
YER046W	SPO73		0.97699	0.099	1.03462	0.014	-0.05075	0.099	0.00028
YER046W-A	YER046W-A		0.97912	0.146	1.04897	0.039	-0.07285	0.146	0.0009
YER047C	SAP1		1.04905	0.057	1.03492	0.056	0.00925	0.057	4e-05
YER048C	CAJ1		1.08274	0.013	1.03887	0.04	0.04299	0.013	0
YER049W	TPA1		0.94937	0.048	0.95616	0.041	-0.01534	0.048	3e-05
YER051W	JHD1		1.1001	0.011	1.00984	0.04	0.08659	0.011	3e-05	status=JK
YER052C	HOM3		0.8945	0.08	0.98493	0.008	-0.09143	0.08	0.00019
YER053C	PIC2		1.08808	0.065	1.09278	0.024	-0.01099	0.065	6e-05
YER054C	GIP2		1.06845	0.043	1.10546	0.015	-0.04005	0.043	2e-05
YER055C	HIS1		0.32377	0.047	0.33195	0.006	-0.00723	0.047	0.00084
YER056C	FCY2		0.98409	0.123	1.05166	0.002	-0.0669	0.123	0.00053
YER056C-A	RPL34A		0.96337	0.014	1.00416	0.007	-0.0378	0.014	0
YER057C	HMF1		1.06842	0.049	1.07194	0.079	0.01605	0.049	3e-05
YER059W	PCL6		1.04563	0.167	1.03826	0.051	0.00328	0.167	0.0011
YER060W	FCY21		1.02804	0.117	0.99093	0.011	0.03721	0.117	0.0004
YER060W-A	FCY22		1.13495	0.045	1.06006	0.024	0.07432	0.045	2e-05
YER061C	CEM1		0.84692	0.048	0.84354	0.004	0.00411	0.048	5e-05
YER062C	HOR2		1.1482	0.07	1.1422	0.012	0.00603	0.07	6e-05
YER063W	THO1		0.99749	0.11	0.98827	0.01	0.01071	0.11	0.00036
YER064C	VHR2		1.03643	0.033	1.05505	0.03	-0.01435	0.033	1e-05
YER065C	ICL1		1.0095	0.008	0.95128	0.03	0.04435	0.008	2e-05	status=JK
YER066C-A	YER066C-A		0.98255	0.069	1.04199	0.048	-0.06993	0.069	9e-05
YER066W	RRT13		0.88939	0.144	0.95844	0.04	-0.073	0.144	0.00114
YER067C-A	YER067C-A		1.0516	0.044	0.94897	0.004	0.1036	0.044	0.00059	status=JK
YER067W	RGI1		1.06839	0.067	1.06384	0.052	-0.00434	0.067	7e-05
YER069W	ARG5		0.51931	0.122	0.53974	0.053	-0.02817	0.121	0.00338
YER071C	TDA2		1.03195	0.083	1.03676	0.048	-0.02163	0.083	0.00014
YER072W	VTC1		0.96669	0.065	0.99147	0.021	-0.02844	0.065	8e-05
YER073W	ALD5		1.06684	0.064	1.05788	0.043	-0.0004	0.064	6e-05
YER074W	RPS24A		0.72813	0.025	0.71886	0.046	-0.00499	0.025	1e-05
YER075C	PTP3		1.00783	0.087	1.05854	0.02	-0.04792	0.086	0.00017
YER077C	YER077C		0.99045	0.064	0.97785	0.016	0.00743	0.064	7e-05
YER078C	ICP55		1.00363	0.072	1.01526	0.02	-0.0137	0.072	0.0001
YER079W	YER079W		1.01514	0.014	1.02077	0.031	-0.00824	0.014	0
YER080W	AIM9		1.12883	0.029	1.0406	0.033	0.09646	0.029	0.00022	status=JK
YER081W	SER3		0.92326	0.071	0.98484	0.059	-0.04545	0.071	0.00013
YER083C	GET2		0.97409	0.022	0.88518	0.052	0.07973	0.022	0
YER084W	YER084W		1.12776	0.1	1.09738	0.097	0.02739	0.1	0.00019
YER085C	YER085C		1.08449	0.002	1.13413	0.017	-0.04644	0.002	0	status=JK
YER087C-A	YER087C-A		1.15911	0.1	1.14323	0.018	0.01804	0.1	0.00018
YER088C	DOT6		0.92547	0.077	0.9202	0.013	0.0092	0.077	0.00016
YER089C	PTC2		0.84785	0.038	1.06695	0.15	-0.2496	0.038	3e-05
YER090W	TRP2		0.99103	0.01	0.92059	0.018	0.06024	0.01	3e-05	status=JK
YER091C	MET6		1.06372	0.097	1.04408	0.022	0.02314	0.097	0.00021
YER091C-A	YER091C-A		1.10204	0.015	1.00784	0.021	0.09421	0.015	6e-05	status=JK
YER092W	IES5		0.84223	0.077	0.86677	0.057	-0.02133	0.077	0.00021
YER093C-A	AIM11		0.81425	0.117	0.62688	0.041	0.19896	0.116	0.00079
YER095W	RAD51		0.80588	0.134	0.83484	0.013	-0.0311	0.134	0.00124
YER096W	SHC1		0.96408	0.095	1.05224	0.113	-0.08628	0.095	0.00026
YER097W	YER097W		0.99149	0.046	1.02154	0.065	-0.04711	0.046	3e-05
YER098W	UBP9		0.93159	0.095	0.94326	0.048	-0.00864	0.095	0.00029
YER101C	AST2		1.01882	0.046	0.94585	0.111	0.04875	0.046	3e-05
YER106W	MAM1		1.10751	0.212	1.17527	0.101	-0.06759	0.212	0.00187
YER108C	YER108C		0.91573	0.06	0.94874	0.113	-0.03149	0.06	8e-05
YER109C	FLO8		0.89035	0.064	0.87913	0.035	0.00819	0.063	0.0001
YER111C	SWI4		0.97062	0.016	0.94657	0.077	0.03323	0.016	0
YER113C	TMN3		1.05503	0.053	1.02327	0.016	0.03782	0.053	3e-05
YER114C	BOI2		1.01121	0.057	0.96201	0.03	0.034	0.057	5e-05
YER115C	SPR6		1.00982	0.026	1.04041	0.016	-0.03162	0.026	0.00022	status=JK
YER116C	SLX8		0.36521	0.065	0.34197	0.064	0.03895	0.064	0.00148
YER117W	RPL23B		0.85878	0.018	0.88108	0.071	-0.02623	0.018	0.00015	status=JK
YER118C	SHO1		1.01184	0.051	1.05139	0.058	-0.0353	0.051	4e-05
YER119C	AVT6		1.05288	0.091	1.02402	0.014	0.0344	0.091	0.00018
YER119C-A	YER119C-A		0.87092	0.064	0.82823	0.038	0.05199	0.064	0.00011
YER120W	SCS2		0.87957	0.07	0.75963	0.081	0.11758	0.07	0.00014
YER121W	YER121W		0.96374	0.179	1.1111	0.002	-0.14746	0.178	0.00171
YER123W	YCK3		0.70712	0.108	0.77683	0.003	-0.07053	0.108	0.00096
YER124C	DSE1		0.98885	0.12	0.90964	0.072	0.08953	0.12	0.00048
YER128W	VFA1		0.92513	0.065	0.96419	0.055	-0.02784	0.064	9e-05
YER129W	SAK1		1.01346	0.078	1.06672	0.015	-0.04983	0.077	0.00012
YER130C	YER130C		1.11343	0.018	1.01358	0.053	0.08613	0.018	8e-05	status=JK
YER131W	RPS26B		0.76256	0.098	0.75418	0.005	0.00661	0.097	0.00057
YER132C	PMD1		0.94475	0.229	0.93801	0.074	0.01604	0.229	0.00375
YER134C	YER134C		0.89765	0.157	0.93126	0.024	-0.03399	0.157	0.00144
YER135C	YER135C		1.10891	0.016	1.07165	0.049	0.0447	0.016	7e-05	status=JK
YER137C	YER137C		1.11534	0.054	1.19659	0.043	-0.09073	0.054	3e-05
YER139C	RTR1		1.00016	0.211	0.98112	0.05	0.01539	0.21	0.00247
YER140W	YER140W		1.03464	0.029	1.07442	0.056	-0.04233	0.029	1e-05
YER142C	MAG1		1.09976	0.045	0.93429	0.028	0.16428	0.045	0.00056	status=JK
YER143W	DDI1		0.91775	0.119	0.99223	0.015	-0.06797	0.119	0.00059
YER144C	UBP5		1.13201	0.143	0.9931	0.012	0.13463	0.142	0.00055
YER145C	FTR1		0.99647	0.066	1.02594	0.034	-0.03424	0.066	8e-05
YER149C	PEA2		1.11299	0.041	1.02859	0.045	0.08013	0.041	0.00044	status=JK
YER150W	SPI1		0.95782	0.071	0.9216	0.028	0.03962	0.071	0.00011
YER151C	UBP3		0.93919	0.012	0.78614	0.036	0.14471	0.012	5e-05	status=JK
YER152C	YER152C		0.99798	0.008	0.97314	0.05	0.0307	0.008	2e-05	status=JK
YER153C	PET122		0.73228	0.117	0.68876	0.019	0.04465	0.117	0.00111
YER155C	BEM2		1.02214	0.085	0.96647	0.069	0.05424	0.085	0.00016
YER156C	YER156C		0.94932	0.071	0.91691	0.011	0.02796	0.071	0.00012
YER158C	YER158C		1.14607	0.073	1.22384	0.016	-0.08132	0.073	7e-05
YER161C	SPT2		0.8849	0.018	0.91877	0.018	-0.03268	0.018	0.00014	status=JK
YER162C	RAD4		0.43206	0.131	0.59857	0.183	-0.14213	0.131	0.00706
YER163C	GCG1		0.96163	0.099	0.97174	0.099	-0.03951	0.099	0.0003
YER164W	CHD1		1.00813	0.019	0.95196	0.02	0.05341	0.019	0
YER166W	DNF1		1.05965	0.097	1.07251	0.066	-0.00812	0.097	0.00021
YER167W	BCK2		0.99294	0.039	1.01164	0.026	-0.01619	0.039	2e-05
YER170W	ADK2		1.03052	0.045	1.01587	0.031	0.01089	0.045	2e-05
YER173W	RAD24		0.92495	0.009	1.09492	0.011	-0.16345	0.009	3e-05	status=JK
YER174C	GRX4		0.92237	0.026	0.95247	0.066	-0.02803	0.026	0.00026	status=JK
YER175C	TMT1		0.97913	0.035	0.94383	0.018	0.03063	0.035	1e-05
YER176W	ECM32		0.93257	0.098	0.96277	0.032	-0.03014	0.098	0.00032
YER177W	BMH1		0.8899	0.009	0.89299	0.021	-0.00113	0.009	4e-05	status=JK
YER178W	PDA1		0.74538	0.077	0.69569	0.031	0.04889	0.077	0.00031
YER179W	DMC1		0.98537	0.113	0.91929	0.027	0.06823	0.113	0.00042
YER180C	ISC10		1.0458	0.037	0.97131	0.037	0.06582	0.037	1e-05
YER181C	YER181C		1.02155	0.013	0.97159	0.017	0.05289	0.013	5e-05	status=JK
YER182W	FMP10		0.99792	0.064	1.01492	0.015	-0.01451	0.064	7e-05
YER183C	FAU1		1.16721	0.032	1.07436	0.057	0.11288	0.032	0.00025	status=JK
YER184C	YER184C		1.11936	0.03	1.068	0.009	0.05295	0.03	1e-05
YER185W	PUG1		1.04089	0.046	1.0302	0.008	0.01463	0.046	2e-05
YER186C	YER186C		0.93638	0.027	0.93166	0.06	0.00303	0.027	1e-05
YER187W	YER187W		1.16149	0.012	1.14171	0.057	0.00605	0.012	4e-05	status=JK
YER188W	YER188W		0.98311	0.121	1.02617	0.016	-0.05075	0.121	0.00051
YFL001W	DEG1		0.70345	0.053	0.61249	0.016	0.09399	0.053	0.00012
YFL003C	MSH4		1.19711	0.063	#NUM!	#NUM!	#NUM!	#NUM!	4e-05
YFL004W	VTC2		1.00187	0.097	0.83668	0.187	0.17441	0.096	0.00025
YFL006W	YFL006W		0.91355	0.1	0.95155	0.049	-0.03254	0.1	0.00036
YFL007W	BLM10		0.98366	0.021	0.95273	0.049	0.03005	0.021	0.00015	status=JK
YFL010C	WWM1		1.0552	0.059	0.91943	0.13	0.10436	0.059	5e-05
YFL010W-A	AUA1		1.1413	0.045	1.25407	0.007	-0.11035	0.045	2e-05
YFL011W	HXT10		0.93437	0.012	0.98812	0.063	-0.04581	0.012	5e-05	status=JK
YFL012W	YFL012W		0.92943	0.079	1.05996	0.049	-0.11698	0.079	0.00017
YFL013C	IES1		0.94126	0.037	0.90964	0.163	0.0207	0.037	2e-05
YFL013W-A	YFL013W-A		0.90396	0.069	0.92522	0.036	-0.0322	0.068	0.00012
YFL014W	HSP12		1.06166	0.005	1.03414	0.023	0.01977	0.005	1e-05	status=JK
YFL015C	YFL015C		1.22739	0.056	1.14683	0.149	0.05945	0.056	0.0007	status=JK
YFL018C	LPD1		0.94933	0.08	0.97737	0.068	-0.02632	0.079	0.00016
YFL019C	YFL019C		1.09708	0.022	1.07503	0.001	0.02272	0.021	0.00013	status=JK
YFL020C	PAU5		0.88927	0.015	1.02471	0.01	-0.13133	0.015	9e-05	status=JK
YFL021W	GAT1		1.079	0.088	1.1465	0.018	-0.07168	0.088	0.00015
YFL023W	BUD27		0.94801	0.023	0.83435	0.005	0.11426	0.023	0.0002	status=JK
YFL025C	BST1		1.15069	0.174	1.07111	0.022	0.08071	0.174	0.00094
YFL026W	STE2		0	0	0.00071	0.001	-0.00035	0	#NUM!
YFL027C	GYP8		1.04928	0.084	1.05022	0.041	-0.00202	0.084	0.00014
YFL028C	CAF16		1.10565	0.039	1.08137	0.045	0.03421	0.038	1e-05
YFL030W	AGX1		0.96592	0.076	0.95168	0.048	0.00095	0.076	0.00013
YFL031W	HAC1		0.90578	0.139	0.98084	0.108	-0.06323	0.139	0.00098
YFL032W	YFL032W		1.06187	0.083	1.02678	0.127	0.05188	0.083	0.00013
YFL033C	RIM15		1.10404	0.084	1.02535	0.075	0.06502	0.083	0.00012
YFL034C-A	RPL22B		1.19887	0.041	1.07668	0.046	0.1144	0.041	1e-05
YFL034W	YFL034W		1.07791	0.088	1.01963	0.026	0.0641	0.087	0.00015
YFL035C-B	YFL035C-B		1.05988	0.139	1.06024	0.102	0.02548	0.139	0.00061
YFL036W	RPO41		0.77657	0.113	0.78912	0.031	-0.01381	0.113	0.00083
YFL040W	YFL040W		1.01526	0.056	1.00123	0.041	0.01952	0.056	5e-05
YFL041W	FET5		1.13391	0.129	1.10003	0.071	0.04196	0.129	0.0004
YFL042C	YFL042C		1.04795	0.006	0.98461	0.026	0.06561	0.006	0
YFL043C	YFL043C		0.99773	0.053	0.97633	0.069	0.00763	0.053	4e-05
YFL044C	OTU1		0.94568	0.02	1.02864	0.075	-0.10039	0.02	0.00016	status=JK
YFL046W	FMP32		1.03635	0.067	1.08165	0.052	-0.0566	0.067	8e-05
YFL047W	RGD2		0.96654	0.111	1.05373	0.006	-0.08908	0.111	0.00041
YFL048C	EMP47		1.20079	0.085	1.18268	0.019	0.00752	0.085	0.0001
YFL049W	SWP82		0.99761	0.116	1.00785	0.11	0.0069	0.116	0.00043
YFL050C	ALR2		1.1558	0.084	1.1357	0.012	0.02247	0.084	0.0001
YFL051C	YFL051C		1.01023	0.047	1.01448	0.054	-0.00654	0.047	3e-05
YFL052W	YFL052W		1.12423	0.059	1.09075	0.037	0.0245	0.059	4e-05
YFL053W	DAK2		1.1016	0.053	1.09508	0.015	-0.00171	0.053	3e-05
YFL054C	YFL054C		1.16399	0.005	1.13336	0.047	0.04292	0.005	1e-05	status=JK
YFL055W	AGP3		0.98484	0.094	1.07457	0.046	-0.08122	0.094	0.00024
YFL056C	AAD6		1.03582	0.022	1.09003	0.079	-0.04646	0.022	0
YFL063W	YFL063W		1.15633	0.123	1.14521	0.037	0.00842	0.123	0.00033
YFR006W	YFR006W		0.93842	0.08	0.92352	0.028	0.02187	0.08	0.00017
YFR007W	YFH7		0.89223	0.174	0.9493	0.032	-0.05984	0.174	0.00198
YFR008W	FAR7		0.81393	0.084	0.92855	0.035	-0.10793	0.084	0.0003
YFR009W	GCN20		1.06534	0.103	0.9962	0.064	0.07394	0.103	0.00025
YFR010W	UBP6		0.69485	0.087	0.5769	0.011	0.11876	0.087	0.00054
YFR011C	AIM13		0.77264	0.029	0.76682	0.059	0.02087	0.029	0.00046	status=JK
YFR012W	DCV1		0.95202	0.03	0.97113	0.033	-0.01456	0.03	1e-05
YFR013W	IOC3		0.88146	0.006	0.96896	0.011	-0.09091	0.006	1e-05	status=JK
YFR014C	CMK1		1.07273	0.025	1.04563	0.036	0.03647	0.025	0
YFR015C	GSY1		1.0486	0.064	1.13036	0.033	-0.07146	0.064	6e-05
YFR016C	YFR016C		1.06113	0.028	1.07154	0.034	-0.01575	0.028	1e-05
YFR017C	IGD1		1.05701	0.021	1.01459	0.029	0.04267	0.021	0
YFR018C	YFR018C		1.0812	0.048	1.0924	0.023	-0.00532	0.048	2e-05
YFR019W	FAB1		0.76827	0.047	0.83087	0.057	-0.07088	0.047	6e-05
YFR020W	YFR020W		1.06354	0.049	1.06691	0.068	-0.01822	0.049	3e-05
YFR021W	ATG18		0.92018	0.044	0.93368	0.05	-0.00514	0.044	3e-05
YFR022W	ROG3		1.03473	0.029	1.01473	0.019	0.0244	0.029	1e-05
YFR023W	PES4		0.98691	0.04	0.94814	0.043	0.03956	0.04	2e-05
YFR024C	YFR024C		1.021	0.056	1.0234	0.039	0.00725	0.056	5e-05
YFR024C-A	LSB3		1.18923	0.022	1.17115	0.076	0.02651	0.022	0.00011	status=JK
YFR025C	HIS2		0.47983	0.017	0.42965	0.061	0.06668	0.017	0.00042	status=JK
YFR026C	ULI1		1.01297	0.01	1.00931	0.008	0.00353	0.01	3e-05	status=JK
YFR030W	MET10		0.95133	0.002	0.94297	0.022	0.0159	0.002	0	status=JK
YFR031C-A	RPL2A		0.98313	0.048	1.03305	0.027	-0.04735	0.048	3e-05
YFR032C	RRT5		1.0036	0.053	1.07157	0.109	-0.0409	0.053	4e-05
YFR032C-A	RPL29		0.84956	0.023	0.8506	0.018	0.00459	0.023	0.00024	status=JK
YFR033C	QCR6		1.01845	0.021	0.98681	0.041	0.04021	0.021	0.00014	status=JK
YFR034C	PHO4		1.01868	0.026	1.04932	0.03	-0.03298	0.026	0
YFR035C	YFR035C		1.05616	0.064	0.99751	0.007	0.05702	0.064	6e-05
YFR038W	IRC5		0.97237	0.021	0.94384	0.042	0.02969	0.021	0.00016	status=JK
YFR039C	YFR039C		0.9944	0.009	0.953	0.033	0.03642	0.009	3e-05	status=JK
YFR040W	SAP155		0.87894	0.012	0.87268	0.051	0.01153	0.012	6e-05	status=JK
YFR041C	ERJ5		1.0221	0.045	1.06644	0.043	-0.06092	0.045	2e-05
YFR043C	IRC6		1.13035	0.073	1.14926	0.034	-0.01869	0.072	7e-05
YFR044C	DUG1		1.05619	0.041	1.00985	0.06	0.05504	0.041	2e-05
YFR045W	YFR045W		1.06245	0.02	1.06476	0.005	-0.00365	0.02	0.00012	status=JK
YFR046C	CNN1		1.10912	0.087	1.15547	0.04	-0.05117	0.087	0.00013
YFR047C	BNA6		0.95079	0.077	0.93266	0.132	-0.00988	0.076	0.00014
YFR048W	RMD8		1.07019	0.064	1.02712	0.057	0.03777	0.063	6e-05
YFR049W	YMR31		1.1177	0.015	1.06899	0.03	0.04697	0.015	6e-05	status=JK
YFR053C	HXK1		0.98577	0.074	0.99376	0.055	-0.00319	0.073	0.00011
YFR054C	YFR054C		1.05556	0.032	1.06928	0.075	-0.01986	0.032	1e-05
YFR055W	IRC7		0.98467	0.03	1.01386	0.031	-0.02102	0.03	1e-05
YFR056C	YFR056C		0.99064	0.011	0.96818	0.031	0.02888	0.011	0
YFR057W	YFR057W		1.11551	0.06	1.17599	0.036	-0.06833	0.059	4e-05
YGL002W	ERP6		0.94609	0.077	0.99491	0.05	-0.05754	0.077	0.00015
YGL004C	RPN14		1.02709	0.032	0.9822	0.053	0.04557	0.032	1e-05
YGL005C	COG7		1.03195	0.067	1.07534	0.009	-0.04115	0.067	8e-05
YGL006W	PMC1		0.97925	0.05	0.91416	0.127	0.03628	0.05	4e-05
YGL007W	YGL007W		0.76235	0.035	0.83867	0.041	-0.06921	0.035	3e-05
YGL009C	LEU1		0.96833	0.017	0.98043	0.029	-0.00269	0.017	0
YGL010W	YGL010W		1.05477	0.009	1.11459	0.099	-0.06306	0.009	2e-05	status=JK
YGL013C	PDR1		0.89604	0.08	0.86994	0.01	0.02967	0.08	0.00019
YGL014W	PUF4		1.08019	0.012	0.99616	0.045	0.07533	0.012	4e-05	status=JK
YGL015C	YGL015C		1.08234	0.045	1.07464	0.021	0.00295	0.045	2e-05
YGL016W	KAP122		0.68616	0.167	0.80048	0.017	-0.11298	0.166	0.00376
YGL017W	ATE1		0.98456	0.049	1.01608	0.057	-0.02192	0.049	3e-05
YGL019W	CKB1		0.98153	0.071	0.98877	0.071	-0.01942	0.071	0.00011
YGL020C	GET1		1.06316	0.058	1.11933	0.104	-0.06395	0.058	5e-05
YGL021W	ALK1		1.10597	0.067	1.11436	0.039	-0.00393	0.067	6e-05
YGL023C	PIB2		0.91489	0.04	0.90767	0.023	0.00167	0.04	0.00064	status=JK
YGL024W	YGL024W		0.47097	0.035	0.39264	0.012	0.08169	0.035	0.00011
YGL026C	TRP5		0.01267	0.002	0.0005	0.001	0.01264	0.002	0.01115	status=JK
YGL027C	CWH41		1.00453	0.012	1.01003	0.032	-0.00222	0.012	0
YGL028C	SCW11		1.09657	0.021	1.07962	0.034	0.02545	0.021	0
YGL029W	CGR1		0.87132	0.084	0.89831	0.233	-0.02489	0.084	0.00024
YGL031C	RPL24A		0.66867	0.034	0.63537	0.045	0.04591	0.034	4e-05
YGL032C	AGA2		1.14311	0.094	1.17358	0.048	-0.02295	0.094	0.00015
YGL034C	YGL034C		1.05763	0.1	1.11632	0.01	-0.05764	0.099	0.00023
YGL035C	MIG1		0.94663	0.087	0.94385	0.006	0.00199	0.087	0.00021
YGL036W	YGL036W		1.02159	0.093	1.03142	0.087	-0.01547	0.093	0.00021
YGL037C	PNC1		1.05471	0.114	1.14308	0.142	-0.09383	0.113	0.00034
YGL039W	YGL039W		1.02985	0.08	1.05151	0.064	-0.03045	0.08	0.00013
YGL041C	YGL041C		0.95296	0.039	0.98709	0.023	-0.02759	0.039	2e-05
YGL042C	YGL042C		0.94919	0.006	1.06267	0.1	-0.13322	0.006	1e-05	status=JK
YGL043W	DST1		0.78874	0.037	0.79623	0.015	-0.00699	0.036	3e-05
YGL045W	RIM8		0.1106	0.079	0.16262	0.12	-0.07415	0.079	0.06748
YGL046W	YGL046W		0.70872	0.047	0.559	0.012	0.14482	0.047	8e-05
YGL049C	TIF4632		1.15835	0.03	0.9244	0.054	0.22153	0.03	0.00023	status=JK
YGL050W	TYW3		1.13201	0.008	1.10555	0.037	0.02263	0.008	2e-05	status=JK
YGL051W	MST27		1.00405	0.069	1.03721	0.058	-0.02057	0.068	9e-05
YGL053W	PRM8		1.0493	0.022	1.06405	0.058	0.00648	0.022	0.00015	status=JK
YGL054C	ERV14		1.04268	0.122	1.0709	0.151	-0.03858	0.122	0.00044
YGL056C	SDS23		1.07874	0.063	1.00234	0.062	0.07577	0.063	6e-05
YGL057C	GEP7		0.72973	0.057	0.68501	0.063	0.048	0.057	0.00013
YGL058W	RAD6		1.08785	0.061	1.00551	0.058	0.08468	0.061	5e-05
YGL059W	PKP2		1.04857	0.007	0.99577	0.047	0.06462	0.007	0
YGL060W	YBP2		1.00869	0.049	1.01761	0.075	-0.00106	0.049	3e-05
YGL062W	PYC1		1.19708	0.088	1.19159	0.016	0.00756	0.088	0.00011
YGL063W	PUS2		0.82896	0.168	0.87166	0.287	-0.04103	0.168	0.00221
YGL066W	SGF73		0.91137	0.021	0.79415	0.003	0.11717	0.021	0.00018	status=JK
YGL067W	NPY1		1.06394	0.06	1.06696	0.032	0.00274	0.059	5e-05
YGL071W	AFT1		0.8944	0.034	0.92272	0.157	-0.017	0.034	0.00048	status=JK
YGL077C	HNM1		1.03682	0.044	0.99971	0.054	0.05304	0.044	2e-05
YGL078C	DBP3		0.80344	0.014	0.8082	0.07	-0.0238	0.014	0.0001	status=JK
YGL079W	KXD1		0.92027	0.002	0.94647	0.029	-0.01866	0.002	0	status=JK
YGL080W	FMP37		0.75008	0.089	0.71504	0.021	0.0446	0.089	0.00045
YGL081W	YGL081W		1.05975	0.056	1.10231	0.054	-0.0487	0.056	4e-05
YGL082W	YGL082W		1.01464	0.016	1.0719	0.029	-0.06289	0.016	9e-05	status=JK
YGL083W	SCY1		1.00734	0.047	0.99069	0.02	0.01388	0.047	3e-05
YGL084C	GUP1		0.83662	0.017	0.92928	0.055	-0.09531	0.017	0
YGL085W	LCL3		1.07725	0.066	1.03223	0.065	0.03974	0.066	6e-05
YGL086W	MAD1		0.9196	0.049	0.97192	0.041	-0.05765	0.049	4e-05
YGL087C	MMS2		0.91918	0.026	0.87085	0.045	0.05346	0.026	1e-05
YGL089C	MF(ALPHA)2		1.04945	0.047	1.02268	0.05	0.01919	0.047	2e-05
YGL090W	LIF1		1.06586	0.042	1.03429	0.023	0.03151	0.042	2e-05
YGL094C	PAN2		1.03431	0.063	1.07908	0.12	-0.06702	0.063	6e-05
YGL096W	TOS8		0.95028	0.062	0.921	0.224	0.01556	0.062	8e-05
YGL101W	YGL101W		1.03669	0.023	1.00568	0.006	0.03439	0.023	0
YGL104C	VPS73		0.99794	0.068	0.96769	0.104	0.01697	0.068	9e-05
YGL105W	ARC1		0.01125	0.014	0.0048	0.008	0.01123	0.014	0.19548
YGL108C	YGL108C		1.05479	0.039	1.05417	0.001	0.00119	0.039	1e-05
YGL109W	YGL109W		1.07557	0.057	1.08224	0.018	-0.00929	0.057	4e-05
YGL110C	CUE3		0.9421	0.058	0.95154	0.037	-0.01181	0.058	7e-05
YGL114W	YGL114W		0.91465	0.036	0.96809	0.008	-0.05259	0.036	2e-05
YGL115W	SNF4		0.88965	0.005	0.90726	0.057	-0.00024	0.005	0
YGL117W	YGL117W		1.12474	0.037	1.18285	0.034	-0.07662	0.037	1e-05
YGL118C	YGL118C		0.98615	0.04	1.057	0.042	-0.09104	0.04	2e-05
YGL121C	GPG1		1.01504	0.067	1.03229	0.012	-0.01439	0.067	8e-05
YGL124C	MON1		0.84782	0.054	0.90285	0.106	-0.07049	0.054	7e-05
YGL125W	MET13		1.1541	0.006	1.12039	0.035	0.02496	0.006	1e-05	status=JK
YGL126W	SCS3		0.96679	0.071	1.0182	0.021	-0.0481	0.07	0.00011
YGL127C	SOH1		0.59486	0.014	0.50746	0.051	0.08838	0.014	0.00019	status=JK
YGL131C	SNT2		0.98592	0.041	0.95863	0.036	0.03083	0.041	2e-05
YGL132W	YGL132W		0.93562	0.053	0.9417	0.003	-0.00423	0.053	5e-05
YGL133W	ITC1		0.96955	0.063	1.04072	0.023	-0.0667	0.063	8e-05
YGL136C	MRM2		0.23787	0.084	0.38409	0.163	-0.18728	0.084	0.01079
YGL138C	YGL138C		1.15089	0.008	1.16354	0.1	-0.01736	0.008	0
YGL139W	FLC3		1.00211	0.031	1.02019	0.041	-0.02083	0.031	1e-05
YGL140C	YGL140C		0.96684	0.009	1.00163	0.074	-0.04282	0.009	3e-05	status=JK
YGL141W	HUL5		1.04516	0.015	0.98662	0.089	0.05419	0.015	7e-05	status=JK
YGL144C	ROG1		1.08113	0.007	1.04894	0.055	0.01512	0.007	2e-05	status=JK
YGL146C	RRT6		1.06408	0.025	1.10987	0.023	-0.04518	0.025	0
YGL147C	RPL9A		0.99244	0.032	1.05608	0.02	-0.05828	0.032	1e-05
YGL148W	ARO2		0.89964	0.002	0.84892	0.055	0.0389	0.002	0	status=JK
YGL149W	YGL149W		0.91193	0.06	0.9813	0.071	-0.06297	0.059	8e-05
YGL151W	NUT1		0.70822	0.029	0.74169	0.098	-0.01256	0.029	2e-05
YGL152C	YGL152C		1.03623	0.025	1.03447	0.096	0.01935	0.025	0
YGL153W	PEX14		0.89546	0.043	0.85653	0.104	0.01617	0.043	3e-05
YGL154C	LYS5		0.37752	0.081	0.36856	0.095	0.0309	0.081	0.00266
YGL156W	AMS1		0.98811	0.013	0.91273	0.015	0.07787	0.013	6e-05	status=JK
YGL157W	ARI1		1.11185	0.022	1.1197	0.043	-0.00326	0.022	0.00013	status=JK
YGL158W	RCK1		1.05297	0.027	1.03673	0.082	0.03223	0.027	0
YGL159W	YGL159W		0.95142	0.077	0.99776	0.027	-0.03966	0.077	0.00014
YGL160W	AIM14		0.91283	0.066	0.9105	0.078	0.00162	0.066	0.00011
YGL161C	YIP5		0.97774	0.042	1.05877	0.036	-0.0863	0.041	2e-05
YGL162W	SUT1		1.00931	0.01	0.99796	0.037	0.01417	0.009	3e-05	status=JK
YGL163C	RAD54		0.91437	0.042	0.86629	0.022	0.04667	0.042	3e-05
YGL164C	YRB30		1.08607	0.027	1.13791	0.057	-0.06091	0.027	0
YGL165C	YGL165C		1.09137	0.025	1.11089	0.014	-0.0257	0.025	0
YGL166W	CUP2		1.06592	0.046	1.05897	0.039	0.00577	0.046	2e-05
YGL167C	PMR1		0.75633	0.02	0.76971	0.026	-0.01386	0.02	0.00022	status=JK
YGL168W	HUR1		0.752	0.048	0.77827	0.045	-0.03383	0.047	7e-05
YGL170C	SPO74		1.00574	0.151	1.04156	0.072	-0.05383	0.151	0.00092
YGL173C	XRN1		0.58192	0.049	0.54276	0.039	0.0395	0.049	0.00016
YGL174W	BUD13		0.65112	0.018	0.74299	0.061	-0.10052	0.018	0.00025	status=JK
YGL175C	SAE2		0.91872	0.002	0.9466	0.044	-0.02854	0.002	0	status=JK
YGL176C	YGL176C		1.14704	0.034	1.16665	0.048	-0.01376	0.034	1e-05
YGL177W	YGL177W		1.16676	0.067	1.19022	0.041	-0.02943	0.066	5e-05
YGL179C	TOS3		1.12186	0.054	1.18558	0.03	-0.05903	0.054	3e-05
YGL180W	ATG1		0.88334	0.127	0.88583	0.094	0.00197	0.126	0.0008
YGL181W	GTS1		0.93125	0.012	1.01845	0.037	-0.08415	0.012	5e-05	status=JK
YGL194C	HOS2		0.48175	0.047	0.46128	0.014	0.01926	0.047	0.00322	status=JK
YGL195W	GCN1		0.84062	0.057	0.83841	0.056	-0.00643	0.057	8e-05
YGL196W	DSD1		1.0587	0.042	0.99958	0.056	0.04182	0.042	2e-05
YGL197W	MDS3		0.95596	0.007	0.90613	0.054	0.05062	0.007	2e-05	status=JK
YGL198W	YIP4		0.94918	0.035	1.09256	0.047	-0.14234	0.035	1e-05
YGL199C	YGL199C		0.96494	0.013	0.97263	0.066	0.0084	0.013	6e-05	status=JK
YGL202W	ARO8		1.01118	0.068	1.07165	0.037	-0.0636	0.068	8e-05
YGL203C	KEX1		1.08823	0.024	1.02964	0.014	0.05365	0.024	0
YGL205W	POX1		1.03334	0.003	0.96741	0.022	0.07161	0.003	0	status=JK
YGL208W	SIP2		0.95711	0.044	0.97321	0.051	-0.01656	0.043	3e-05
YGL209W	MIG2		0.97902	0.034	0.93238	0.012	0.04472	0.034	1e-05
YGL210W	YPT32		0.92008	0.061	0.94675	0.035	-0.02961	0.061	8e-05
YGL211W	NCS6		0.9489	0.095	0.99759	0.008	-0.04649	0.094	0.00027
YGL212W	VAM7		0.70864	0.019	0.75667	0.025	-0.04623	0.019	1e-05
YGL213C	SKI8		0.99243	0.019	1.02848	0.011	-0.03362	0.019	0.00012	status=JK
YGL214W	YGL214W		0.16309	0.094	0.0804	0.053	0.09967	0.094	0.0408
YGL215W	CLG1		0.90688	0.037	0.91684	0.023	-0.01475	0.037	2e-05
YGL216W	KIP3		1.01695	0.059	0.95848	0.047	0.07058	0.059	5e-05
YGL217C	YGL217C		0.98269	0.065	0.99325	0.019	-0.01011	0.065	8e-05
YGL218W	YGL218W		0.693	0.002	0.73419	0.035	-0.05271	0.002	0	status=JK
YGL219C	MDM34		0.94613	0.036	0.93932	0.023	0.01145	0.035	1e-05
YGL221C	NIF3		0.98098	0.021	0.95705	0.024	0.02897	0.021	0.00015	status=JK
YGL222C	EDC1		1.0768	0.008	1.11345	0.038	-0.0415	0.008	2e-05	status=JK
YGL224C	SDT1		1.10351	0.036	1.07507	0.007	0.03077	0.036	1e-05
YGL226C-A	OST5		1.14906	0.009	1.19527	0.025	-0.04451	0.009	0
YGL226W	MTC3		0.94308	0.063	0.90508	0.071	0.04971	0.063	8e-05
YGL227W	VID30		0.96308	0.087	1.04774	0.067	-0.08427	0.087	0.0002
YGL228W	SHE10		1.01981	0.036	1.02911	0.013	-0.009	0.036	1e-05
YGL229C	SAP4		1.09814	0.094	1.12463	0.029	-0.01852	0.094	0.00017
YGL230C	YGL230C		1.00763	0.057	0.97867	0.066	0.01033	0.057	5e-05
YGL231C	EMC4		1.04035	0.018	1.0613	0.037	-0.02751	0.018	0.0001	status=JK
YGL232W	TAN1		1.09269	0.022	1.18735	0.029	-0.08731	0.021	0.00013	status=JK
YGL234W	ADE5		1.05545	0.046	1.0391	0.051	0.0168	0.046	2e-05
YGL235W	YGL235W		0.88955	0.039	0.73627	0.038	0.15675	0.039	2e-05
YGL236C	MTO1		0.88414	0.021	0.77562	0.022	0.1068	0.021	0.00019	status=JK
YGL237C	HAP2		0.83299	0.013	0.74024	0.03	0.0949	0.013	0
YGL241W	KAP114		1.0899	0.085	1.12164	0.027	-0.02744	0.085	0.00013
YGL242C	YGL242C		1.02534	0.057	1.03672	0.058	-0.01957	0.056	5e-05
YGL243W	TAD1		1.01278	0.047	1.03552	0.028	-0.02054	0.047	3e-05
YGL244W	RTF1		0.5872	0.063	0.52704	0.093	0.02905	0.063	0.00034
YGL248W	PDE1		0.96904	0.053	1.00012	0.068	-0.026	0.053	4e-05
YGL249W	ZIP2		1.09671	0.037	1.04051	0.018	0.05989	0.037	1e-05
YGL250W	RMR1		1.00993	0.053	1.00214	0.097	0.00525	0.053	4e-05
YGL251C	HFM1		1.12647	0.044	1.15555	0.03	-0.02242	0.044	2e-05
YGL252C	RTG2		0.50192	0.029	0.47739	0.088	0.00744	0.029	5e-05
YGL253W	HXK2		1.03016	0.049	0.94173	0.059	0.10102	0.049	3e-05
YGL254W	FZF1		0.91855	0.003	0.94935	0.024	-0.0301	0.003	0	status=JK
YGL255W	ZRT1		0.96881	0.048	0.99459	0.051	-0.03548	0.048	3e-05
YGL256W	ADH4		1.09613	0.023	1.12998	0.018	-0.03516	0.023	0.00015	status=JK
YGL257C	MNT2		1.08294	0.004	1.12176	0.054	-0.03862	0.004	1e-05	status=JK
YGL258W	VEL1		0.99573	0.026	0.95832	0.046	0.04551	0.026	0
YGL259W	YPS5		1.08302	0.07	1.08088	0.075	-0.01989	0.07	8e-05
YGL260W	YGL260W		1.03674	0.039	1.0618	0.027	-0.02267	0.039	1e-05
YGL261C	PAU11		0.90302	0.045	0.88272	0.053	0.03495	0.045	3e-05
YGL262W	YGL262W		1.0602	0.004	1.07246	0.044	-0.01215	0.004	0	status=JK
YGL263W	COS12		1.04403	0.056	1.02363	0.1	-0.00272	0.056	4e-05
YGR001C	YGR001C		0.92908	0.032	1.00812	0.103	-0.07349	0.032	0.0004	status=JK
YGR003W	CUL3		0.96349	0.088	1.06236	0.125	-0.10439	0.087	0.00021
YGR004W	PEX31		1.00517	0.033	0.97334	0.052	0.02929	0.033	1e-05
YGR007W	ECT1		0.91622	0.055	0.97332	0.001	-0.05633	0.055	6e-05
YGR008C	STF2		1.05796	0.01	1.03455	0.097	0.025	0.01	3e-05	status=JK
YGR010W	NMA2		0.95595	0.055	0.98429	0.025	-0.0421	0.055	5e-05
YGR011W	YGR011W		0.94448	0.043	0.95183	0.054	-0.0021	0.043	3e-05
YGR012W	YGR012W		1.07514	0.016	1.14507	0.041	-0.06667	0.016	0
YGR014W	MSB2		1.05409	0.028	1.05674	0.029	-0.00207	0.028	1e-05
YGR015C	YGR015C		1.00124	0.051	0.99863	0.04	0	0.051	4e-05
YGR016W	YGR016W		1.08558	0.013	1.09178	0.021	-0.00991	0.013	5e-05	status=JK
YGR017W	YGR017W		0.79845	0.051	0.77097	0.071	0.03145	0.051	7e-05
YGR018C	YGR018C		0.89849	0.047	0.92435	0.019	-0.02166	0.047	4e-05
YGR019W	UGA1		1.0611	0.076	1.01384	0.092	0.04245	0.076	0.0001
YGR021W	YGR021W		1.00187	0.007	0.93776	0.025	0.05013	0.007	2e-05	status=JK
YGR022C	YGR022C		0.92215	0.006	0.92355	0.045	-0.00842	0.006	1e-05	status=JK
YGR023W	MTL1		1.09247	0.043	1.09043	0.042	-0.00439	0.043	2e-05
YGR025W	YGR025W		1.08338	0.037	1.11934	0.009	-0.03161	0.037	1e-05
YGR026W	YGR026W		0.94428	0.049	0.95804	0.05	-0.01386	0.049	4e-05
YGR027C	RPS25A		0.69107	0.051	0.63967	0.077	0.06152	0.051	0.00011
YGR028W	MSP1		0.93196	0.023	0.90755	0.073	0.02744	0.023	0
YGR031W	IMO32		0.97598	0.09	1.03084	0.035	-0.04474	0.09	0.00022
YGR032W	GSC2		0.92873	0.05	0.95402	0.106	-0.0298	0.05	4e-05
YGR033C	TIM21		1.15202	0.06	1.16051	0.145	-0.02895	0.06	4e-05
YGR034W	RPL26B		0.878	0.077	0.90789	0.114	-0.03284	0.077	0.00019
YGR035C	YGR035C		0.95141	0.121	0.9129	0.022	0.04578	0.121	0.00056
YGR037C	ACB1		0.82581	0.033	0.87645	0.005	-0.05045	0.033	2e-05
YGR038W	ORM1		0.88394	0.026	0.97947	0.021	-0.09009	0.026	0.00029	status=JK
YGR039W	YGR039W		0.96402	0.092	0.99732	0.04	-0.02744	0.092	0.00024
YGR040W	KSS1		1.02105	0.061	0.9799	0.045	0.02908	0.061	6e-05
YGR041W	BUD9		1.05337	0.047	1.01916	0.027	0.02994	0.047	2e-05
YGR042W	YGR042W		1.04322	0.036	1.04298	0.011	-0.00105	0.036	1e-05
YGR043C	NQM1		1.05055	0.041	1.07972	0.028	-0.03075	0.041	2e-05
YGR044C	RME1		1.06658	0.063	1.08873	0.025	-0.02598	0.063	6e-05
YGR045C	YGR045C		1.00911	0.024	1.02803	0.018	-0.01461	0.024	0
YGR049W	SCM4		1.00158	0.096	0.99533	0.115	0.02017	0.096	0.00024
YGR050C	YGR050C		1.02394	0.059	1.07912	0.006	-0.05619	0.059	5e-05
YGR051C	YGR051C		1.24793	0.046	1.30319	0.099	-0.03386	0.046	1e-05
YGR052W	FMP48		1.00773	0.003	1.02777	0.054	-0.01728	0.003	0	status=JK
YGR053C	YGR053C		0.96304	0.064	0.96798	0.048	-0.01042	0.064	8e-05
YGR054W	YGR054W		1.01546	0.009	1.03893	0.044	-0.02179	0.009	3e-05	status=JK
YGR055W	MUP1		1.16027	0.022	1.15139	0.123	0.00731	0.022	0
YGR058W	PEF1		1.03017	0.017	0.98569	0.087	0.03926	0.017	0
YGR059W	SPR3		0.91917	0.051	0.85342	0.014	0.06693	0.051	5e-05
YGR061C	ADE6		0.9016	0.204	0.92877	0.021	-0.0295	0.203	0.00304
YGR066C	YGR066C		1.12192	0.032	1.1279	0.035	0.00148	0.032	1e-05
YGR067C	YGR067C		1.00588	0.048	1.10011	0.145	-0.07972	0.047	3e-05
YGR068C	ART5		1.06	0.037	1.09403	0.124	-0.04327	0.037	1e-05
YGR069W	YGR069W		1.07648	0.038	1.09526	0.019	-0.02272	0.038	1e-05
YGR070W	ROM1		0.99708	0.011	1.15413	0.056	-0.17413	0.011	0
YGR071C	ENV11		0.99762	0.041	0.90479	0.014	0.09507	0.041	2e-05
YGR072W	UPF3		0.87992	0.028	0.88164	0.039	-0.00572	0.028	1e-05
YGR077C	PEX8		0.75728	0.015	0.75161	0.051	0.01871	0.015	0
YGR078C	PAC10		0.82241	0.061	0.82835	0.071	-0.00205	0.061	0.00011
YGR079W	YGR079W		0.92354	0.076	0.99933	0.05	-0.09147	0.076	0.00015
YGR080W	TWF1		1.09733	0.024	1.04627	0.02	0.05456	0.024	0.00016	status=JK
YGR081C	SLX9		0.81761	0.027	0.74212	0.069	0.06993	0.027	1e-05
YGR084C	MRP13		1.05459	0.042	1.07844	0.01	-0.02376	0.042	2e-05
YGR085C	RPL11B		0.85667	0.032	0.8652	0.033	0.00166	0.032	1e-05
YGR086C	PIL1		1.06088	0.079	1.10833	0.018	-0.05602	0.079	0.00011
YGR087C	PDC6		1.05538	0.058	1.02359	0.022	0.02983	0.058	5e-05
YGR088W	CTT1		1.10211	0.082	1.14629	0.059	-0.05332	0.081	0.00011
YGR089W	NNF2		1.03426	0.076	0.96064	0.083	0.06949	0.076	0.00011
YGR092W	DBF2		0.51974	0.048	0.49523	0.047	0.01464	0.048	0.00021
YGR093W	YGR093W		0.9391	0.005	0.98197	0.094	-0.04051	0.005	1e-05	status=JK
YGR096W	TPC1		1.00451	0.042	0.9401	0.039	0.07155	0.042	2e-05
YGR097W	ASK10		0.85208	0.099	0.90214	0.012	-0.04719	0.098	0.00042
YGR100W	MDR1		1.01322	0.026	1.00414	0.082	0.00737	0.026	0
YGR101W	PCP1		0.82533	0.008	0.86899	0.049	-0.03929	0.008	3e-05	status=JK
YGR105W	VMA21		0.49719	0.015	0.46991	0.036	0.03213	0.015	0.00031	status=JK
YGR106C	VOA1		1.01053	0.039	1.07484	0.022	-0.0643	0.039	2e-05
YGR107W	YGR107W		0.96943	0.026	0.96904	0.033	-0.00549	0.026	1e-05
YGR108W	CLB1		1.00512	0.022	0.96932	0.067	0.03636	0.022	0.00016	status=JK
YGR109C	CLB6		0.99428	0.037	1.00338	0.008	-0.00573	0.037	1e-05
YGR110W	CLD1		1.00671	0.056	0.99243	0.064	0.02692	0.056	5e-05
YGR111W	YGR111W		0.95518	0.05	0.9378	0.005	0.01716	0.05	4e-05
YGR117C	YGR117C		0.96441	0.048	0.94086	0.036	0.01735	0.048	3e-05
YGR118W	RPS23A		0.88419	0.013	0.91966	0.041	-0.03933	0.013	7e-05	status=JK
YGR121C	MEP1		0.97018	0.048	1.02108	0.031	-0.05656	0.048	3e-05
YGR122C-A	YGR122C-A		1.23123	0.066	1.12924	0.14	0.10884	0.065	4e-05
YGR122W	YGR122W		0.81068	0.017	0.98645	0.147	-0.19836	0.017	0
YGR123C	PPT1		1.15078	0.027	1.13135	0.043	0.02386	0.027	0
YGR124W	ASN2		0.97583	0.045	0.94101	0.053	0.04278	0.045	3e-05
YGR125W	YGR125W		0.82205	0.025	0.79377	0.048	0.03685	0.025	1e-05
YGR126W	YGR126W		1.13543	0.012	1.18992	0.038	-0.04677	0.012	4e-05	status=JK
YGR127W	YGR127W		1.07552	0.079	1.09184	0.009	-0.02082	0.079	0.00011
YGR129W	SYF2		0.98721	0.017	0.98852	0.107	0.02478	0.017	0.0001	status=JK
YGR130C	YGR130C		1.05399	0.088	1.07242	0.06	-0.01229	0.088	0.00016
YGR131W	FHN1		1.1204	0.04	1.09978	0.009	0.0202	0.04	1e-05
YGR132C	PHB1		1.0103	0.008	0.91064	0.063	0.08538	0.008	2e-05	status=JK
YGR133W	PEX4		0.96225	0.053	0.96757	0.06	0.00919	0.053	5e-05
YGR134W	CAF130		0.97484	0.002	1.03241	0.016	-0.05735	0.002	0	status=JK
YGR135W	PRE9		1.00569	0.016	0.97103	0.053	0.02455	0.016	9e-05	status=JK
YGR136W	LSB1		0.88243	0.01	0.95861	0.096	-0.07843	0.01	4e-05	status=JK
YGR137W	YGR137W		1.12993	0.053	1.06825	0.053	0.06053	0.053	3e-05
YGR138C	TPO2		1.05915	0.023	1.15402	0.088	-0.08227	0.023	0
YGR139W	YGR139W		1.13164	0.084	1.21902	0.075	-0.07159	0.084	0.00011
YGR141W	VPS62		0.98382	0.064	0.99483	0.103	-0.00625	0.064	8e-05
YGR142W	BTN2		0.91365	0.052	0.91692	0.044	-0.0029	0.051	5e-05
YGR143W	SKN1		1.12061	0.041	1.12573	0.048	0.00163	0.041	1e-05
YGR144W	THI4		1.08081	0.095	1.12842	0.069	-0.05148	0.095	0.00019
YGR146C	ECL1		1.06554	0.013	1.06883	0.021	-0.01385	0.013	5e-05	status=JK
YGR148C	RPL24B		0.79886	0.035	0.7807	0.042	0.01659	0.035	2e-05
YGR149W	YGR149W		1.06128	0.058	1.12767	0.013	-0.06943	0.057	4e-05
YGR151C	YGR151C		1.16756	0.033	1.1588	0.089	-0.00172	0.032	1e-05
YGR152C	RSR1		1.01456	0.028	1.01726	0.139	-0.02763	0.028	0.00026	status=JK
YGR153W	YGR153W		0.98598	0.031	0.91109	0.046	0.0705	0.031	0.00032	status=JK
YGR154C	GTO1		0.96746	0.071	0.97833	0.047	-0.01902	0.071	0.00011
YGR157W	CHO2		0.5214	0.019	0.482	0.037	0.04724	0.019	0.00042	status=JK
YGR161C	RTS3		1.08163	0.013	1.04431	0.055	0.05326	0.013	5e-05	status=JK
YGR163W	GTR2		0.74766	0.049	0.92719	0.035	-0.18577	0.049	0.00144	status=JK
YGR164W	YGR164W		1.1371	0.109	1.09377	0.003	0.04089	0.109	0.00024
YGR166W	TRS65		0.91679	0.156	0.91092	0.012	0.00214	0.155	0.00131
YGR168C	YGR168C		0.86607	0.171	0.91942	0.013	-0.04972	0.17	0.00203
YGR169C	PUS6		1.01853	0.04	1.0478	0.046	-0.02172	0.04	2e-05
YGR170W	PSD2		1.06407	0.058	1.03299	0.013	0.02968	0.058	4e-05
YGR173W	RBG2		1.02447	0.096	1.0198	0.029	0.0017	0.095	0.00022
YGR174C	CBP4		0.88162	0.045	0.75612	0.064	0.14074	0.045	4e-05
YGR176W	YGR176W		1.16709	0.103	1.19045	0.049	-0.01994	0.103	0.00019
YGR177C	ATF2		1.14279	0.08	1.12022	0.053	0.03442	0.08	9e-05
YGR178C	PBP1		1.07008	0.038	1.10689	0.021	-0.03849	0.038	1e-05
YGR181W	TIM13		1.019	0.332	0.9222	0.031	0.09568	0.331	0.00868
YGR182C	YGR182C		0.97074	0.02	0.82703	0.052	0.1365	0.02	0.00014	status=JK
YGR183C	QCR9		0.95315	0.111	0.82609	0.038	0.13509	0.111	0.00043
YGR184C	UBR1		1.04268	0.009	1.06565	0.033	-0.02164	0.009	2e-05	status=JK
YGR187C	HGH1		0.98515	0.083	1.02238	0.036	-0.04992	0.082	0.00016
YGR188C	BUB1		0.47304	0.153	0.52883	0.071	-0.06321	0.153	0.00855
YGR189C	CRH1		1.06147	0.141	1.11156	0.071	-0.04581	0.14	0.00063
YGR192C	TDH3		0.96598	0.1	1.04676	0.017	-0.08542	0.1	0.0003
YGR193C	PDX1		0.97545	0.101	1.08016	0.068	-0.09168	0.101	0.0003
YGR194C	XKS1		1.08369	0.073	1.00496	0.028	0.07627	0.072	8e-05
YGR196C	FYV8		0.98585	0.063	1.04583	0.054	-0.05697	0.063	7e-05
YGR197C	SNG1		1.21463	0.259	1.11929	0.052	0.09175	0.258	0.00256
YGR199W	PMT6		1.15378	0.221	1.17624	0.067	-0.01697	0.221	0.00187
YGR200C	ELP2		0.89042	0.068	0.86811	0.012	0.01898	0.068	0.00012
YGR201C	YGR201C		1.11795	0.129	1.17301	0.005	-0.05628	0.129	0.00042
YGR202C	PCT1		1.23286	0.057	1.18365	0.049	0.04937	0.057	0.00071	status=JK
YGR203W	YCH1		1.00008	0.226	0.96721	0.026	0.03168	0.226	0.00305
YGR205W	TDA10		1.07904	0.302	1.08782	0.048	-0.01578	0.302	0.00567
YGR206W	MVB12		1.06304	0.042	0.89139	0.005	0.16769	0.042	0.00052	status=JK
YGR207C	CIR1		1.28669	0.197	1.28069	0.003	0.00171	0.197	0.00097
YGR208W	SER2		1.12252	0.088	1.17451	0.117	-0.07804	0.088	0.00013
YGR209C	TRX2		1.05581	0.057	0.98572	0.059	0.06399	0.057	4e-05
YGR210C	YGR210C		1.07888	0.008	1.07342	0.061	-0.01314	0.008	2e-05	status=JK
YGR212W	SLI1		1.08928	0.052	1.20809	0.011	-0.1263	0.052	3e-05
YGR213C	RTA1		1.09829	0.047	1.14475	0.023	-0.03564	0.047	0.00062	status=JK
YGR214W	RPS0A		0.89026	0.082	0.94037	0.03	-0.05065	0.082	0.00022
YGR217W	CCH1		0.92839	0.145	0.95647	0.01	-0.03123	0.145	0.00104
YGR221C	TOS2		0.73826	0.233	0.94413	0.006	-0.20702	0.233	0.00798
YGR223C	HSV2		0.79603	0.044	0.91144	0.052	-0.11493	0.044	0.00102	status=JK
YGR224W	AZR1		0.99812	0.027	1.11313	0.003	-0.11787	0.027	0.00024	status=JK
YGR225W	AMA1		1.04231	0.022	0.94949	0.035	0.09934	0.022	0.00014	status=JK
YGR226C	YGR226C		0.98824	0.172	1.00898	0.056	-0.03159	0.172	0.00141
YGR227W	DIE2		1.1056	0.014	1.13818	0.062	-0.04094	0.014	5e-05	status=JK
YGR228W	YGR228W		0.89101	0.192	1.03237	0.021	-0.14269	0.191	0.00264
YGR229C	SMI1		0.89567	0.168	0.83354	0.05	0.05913	0.168	0.00176
YGR230W	BNS1		1.15586	0.012	1.20199	0.026	-0.0417	0.012	4e-05	status=JK
YGR231C	PHB2		0.57707	0.102	0.717	0.014	-0.1413	0.102	0.00147
YGR232W	NAS6		0.97279	0.142	1.05581	0.052	-0.09301	0.142	0.00084
YGR233C	PHO81		0.90358	0.289	0.99979	0.043	-0.10612	0.288	0.00822
YGR234W	YHB1		1.15187	0.034	1.22583	0.018	-0.07309	0.034	0.00028	status=JK
YGR235C	MOS2		1.07874	0.185	1.09033	0.03	-0.00792	0.184	0.00135
YGR236C	SPG1		0.87566	0.051	0.96035	0.02	-0.08398	0.051	5e-05
YGR237C	YGR237C		0.90303	0.426	1.05271	0.101	-0.16344	0.425	0.02402
YGR238C	KEL2		1.04046	0.083	0.94524	0.086	0.06725	0.083	0.00014
YGR239C	PEX21		0.93251	0.067	0.90774	0.008	0.022	0.067	0.0001
YGR241C	YAP1802		0.99043	0.115	1.0981	0.02	-0.11089	0.115	0.00043
YGR242W	YGR242W		1.09528	0.103	1.14441	0.03	-0.05809	0.103	0.00023
YGR243W	FMP43		1.212	0.109	1.15372	0.006	0.05576	0.109	0.0002
YGR244C	LSC2		1.22216	0.06	1.13133	0.046	0.07575	0.06	3e-05
YGR247W	CPD1		1.09029	0.216	1.00377	0.014	0.09093	0.216	0.00207
YGR248W	SOL4		1.0174	0.142	0.94549	0.015	0.07375	0.142	0.00074
YGR249W	MGA1		1.14074	0.108	1.15285	0.036	-0.01436	0.108	0.00023
YGR250C	YGR250C		0.84452	0.01	0.81213	0.074	0.02577	0.01	5e-05	status=JK
YGR254W	ENO1		1.05831	0.102	1.01406	0.186	0.05368	0.102	0.00025
YGR255C	COQ6		0.93387	0.016	1.01606	0.024	-0.07526	0.016	0.0001	status=JK
YGR256W	GND2		0.84165	0.087	1.04471	0.033	-0.20399	0.087	0.00031
YGR259C	YGR259C		0.7949	0.354	0.95365	0.099	-0.15524	0.353	0.02057
YGR260W	TNA1		0.98704	0.132	0.98026	0.043	0.00193	0.132	0.00065
YGR261C	APL6		1.13309	0.046	1.12811	0.027	0.00476	0.046	0.00055	status=JK
YGR263C	SAY1		0.97012	0.043	1.14536	0.019	-0.17168	0.043	0.00067	status=JK
YGR266W	YGR266W		0.98945	0.187	0.91377	0.104	0.05459	0.187	0.0018
YGR268C	HUA1		1.0324	0.082	1.14482	0.009	-0.11769	0.082	0.00014
YGR269W	YGR269W		1.00961	0.115	0.91673	0.067	0.07265	0.115	0.0004
YGR270W	YTA7		0.70882	0.007	0.57411	0.059	0.12115	0.007	3e-05	status=JK
YGR271W	SLH1		1.02228	0.017	1.16214	0.039	-0.1551	0.017	0
YGR272C	YGR272C		0.88394	0.184	1.00033	0.055	-0.10618	0.184	0.00239
YGR273C	YGR273C		1.08945	0.034	1.11094	0.18	-0.04464	0.034	0.00032	status=JK
YGR275W	RTT102		1.03781	0.13	0.84896	0.049	0.19332	0.13	0.00054
YGR276C	RNH70		1.01703	0.062	0.99633	0.085	0.00231	0.062	6e-05
YGR279C	SCW4		0.54347	0.034	0.79266	0.22	-0.21816	0.034	0.00131	status=JK
YGR281W	YOR1		1.08399	0.025	0.96338	0.017	0.11328	0.025	0.00018	status=JK
YGR282C	BGL2		1.21215	0.116	1.06908	0.053	0.12955	0.116	0.00024
YGR283C	YGR283C		0.95588	0.226	1.04227	0.041	-0.09515	0.226	0.00348
YGR284C	ERV29		1.02474	0.082	1.08337	0.038	-0.06516	0.082	0.00014
YGR286C	BIO2		0.96691	0.128	0.95102	0.039	0.00854	0.128	0.00063
YGR287C	IMA1		1.01596	0.051	0.94735	0.01	0.07169	0.051	3e-05
YGR288W	MAL13		0.98132	0.093	0.99397	0.045	-0.01317	0.093	0.00023
YGR289C	MAL11		0.99814	0.015	0.92572	0.114	0.0886	0.014	7e-05	status=JK
YGR290W	YGR290W		1.1559	0.052	1.13008	0.031	0.01957	0.052	3e-05
YGR291C	YGR291C		1.13584	0.019	#NUM!	#NUM!	#NUM!	#NUM!	0.0001	status=JK
YGR292W	MAL12		1.06195	0.081	1.16605	0.03	-0.10514	0.081	0.00012
YGR295C	COS6		0.95131	0.081	0.94686	0.025	0.00437	0.081	0.00017
YHL002W	HSE1		0.92036	0.145	0.91559	0.03	0.00446	0.145	0.00105
YHL003C	LAG1		0.96203	0.031	0.93575	0.027	0.02598	0.031	0.00035	status=JK
YHL005C	YHL005C		0.83616	0.005	0.84144	0.03	-0.01291	0.005	1e-05	status=JK
YHL006C	SHU1		0.99215	0.065	0.951	0.054	0.04195	0.064	8e-05
YHL007C	STE20		0.47232	0.232	0.53977	0.031	-0.05456	0.231	0.02666
YHL008C	YHL008C		0.89557	0.065	1.03622	0.03	-0.1474	0.065	0.00176	status=JK
YHL009C	YAP3		1.04956	0.025	1.03115	0.022	0.01293	0.025	0.00019	status=JK
YHL010C	ETP1		1.06772	0.101	1.00557	0.059	0.04833	0.101	0.00023
YHL012W	YHL012W		1.05665	0.127	1.02087	0.039	0.02244	0.127	0.00048
YHL013C	OTU2		1.06023	0.114	1.01375	0.092	0.06315	0.113	0.00034
YHL014C	YLF2		1.1298	0.057	1.07621	0.044	0.05852	0.057	3e-05
YHL016C	DUR3		1.02473	0.025	0.97007	0.084	0.05583	0.025	0.00021	status=JK
YHL017W	YHL017W		1.01151	0.153	0.98133	0.044	0.01677	0.152	0.00093
YHL019C	APM2		1.0305	0.06	1.04357	0.02	-0.01451	0.06	5e-05
YHL020C	OPI1		0.65995	0.032	0.7875	0.106	-0.12702	0.032	0.00076	status=JK
YHL021C	AIM17		0.96591	0.127	0.97408	0.027	0.00247	0.126	0.00061
YHL022C	SPO11		1.14173	0.016	1.02347	0.047	0.12907	0.016	7e-05	status=JK
YHL023C	NPR3		0.66724	0.16	0.81258	0.067	-0.16503	0.159	0.00359
YHL024W	RIM4		1.02603	0.124	1.02191	0.004	0.00449	0.124	0.00048
YHL025W	SNF6		0.86286	0.128	0.99022	0.064	-0.11631	0.128	0.00088
YHL026C	YHL026C		1.02541	0.112	0.98874	0.015	0.03606	0.112	0.00035
YHL027W	RIM101		0.77803	0.237	0.71964	0.082	0.06001	0.237	0.00723
YHL028W	WSC4		1.03267	0.334	0.97283	0.029	0.05833	0.334	0.00854
YHL029C	OCA5		0.98136	0.051	0.81604	0.105	0.15378	0.051	0.0009	status=JK
YHL030W	ECM29		0.74255	0.077	1.02065	0.015	-0.28337	0.077	0.00031
YHL031C	GOS1		0.72911	0.084	0.73104	0.038	-0.00288	0.084	0.00041
YHL032C	GUT1		0.98948	0.187	0.94295	0.033	0.04317	0.187	0.0018
YHL033C	RPL8A		0.63461	0.094	0.79162	0.062	-0.15224	0.094	0.00089
YHL034C	SBP1		0.98566	0.116	0.94172	0.023	0.0372	0.116	0.00044
YHL035C	VMR1		0.96202	0.289	1.07042	0.067	-0.12593	0.288	0.00691
YHL036W	MUP3		1.13194	0.097	1.08837	0.035	0.0401	0.096	0.00017
YHL037C	YHL037C		1.09646	0.079	0.94894	0.137	0.11361	0.079	0.00173	status=JK
YHL039W	EFM1		1.03404	0.163	1.00605	0.074	0.02123	0.163	0.00106
YHL040C	ARN1		1.01685	0.175	0.97682	0.064	0.04738	0.175	0.00137
YHL041W	YHL041W		0.85505	0.161	0.8794	0.027	-0.03033	0.161	0.0018
YHL042W	YHL042W		0.93995	0.072	1.02845	0.021	-0.09581	0.072	0.00012
YHL043W	ECM34		1.01717	0.063	0.98175	0.014	0.03265	0.063	7e-05
YHL044W	YHL044W		1.10143	0.108	0.96546	0.079	0.1371	0.108	0.00026
YHL045W	YHL045W		1.06204	0.131	1.02643	0.076	0.01929	0.131	0.00051
YHL046C	PAU13		0.98286	0.132	1.02592	0.064	-0.05175	0.132	0.00066
YHL047C	ARN2		0.97151	0.173	1.01212	0.061	-0.05778	0.173	0.00153
YHR001W-A	QCR10		1.10925	0.118	1.00945	0.027	0.0985	0.117	0.00033
YHR003C	YHR003C		1.10715	0.015	0.95887	0.011	0.152	0.015	6e-05	status=JK
YHR004C	NEM1		1.07255	0.16	0.99096	0.04	0.07819	0.16	0.0009
YHR005C	GPA1		0	0	0.0215	0.001	-0.02107	0	#NUM!
YHR006W	STP2		1.06897	0.11	1.09137	0.039	-0.03289	0.109	0.00029
YHR008C	SOD2		0.85109	0.065	0.86863	0.11	0.00296	0.065	0.00012
YHR009C	TDA3		0.94229	0.197	1.0002	0.038	-0.05986	0.196	0.00241
YHR012W	VPS29		0.7482	0.06	0.76203	0.08	-0.00936	0.06	0.00014
YHR014W	SPO13		0.74442	0.103	0.80395	0.02	-0.06267	0.102	0.00071
YHR015W	MIP6		1.07274	0.051	1.03089	0.007	0.04357	0.051	3e-05
YHR016C	YSC84		1.17065	0.061	1.09917	0.05	0.06051	0.061	4e-05
YHR017W	YSC83		0.7939	0.035	0.77726	0.056	0.01277	0.035	2e-05
YHR018C	ARG4		0.27096	0.042	0.25666	0.021	0.00985	0.042	0.00102
YHR021C	RPS27B		0.49912	0.127	0.61823	0.037	-0.11739	0.127	0.00429
YHR021W-A	ECM12		1.11276	0.152	1.15968	0.07	-0.03525	0.152	0.00069
YHR022C	YHR022C		0.8674	0.298	0.81591	0.183	0.00363	0.298	0.01012
YHR025W	THR1		0.44563	0.036	0.50073	0.04	-0.05843	0.036	0.00217	status=JK
YHR028C	DAP2		0.88268	0.246	0.90724	0.068	-0.03471	0.245	0.00556
YHR029C	YHI9		1.04598	0.049	0.99249	0.012	0.05328	0.049	3e-05
YHR030C	SLT2		1.1548	0.013	0.96111	0.031	0.19898	0.013	4e-05	status=JK
YHR031C	RRM3		1.22593	0.04	0.99658	0.016	0.23182	0.04	0.00036	status=JK
YHR032W	ERC1		1.01299	0.074	1.14724	0.041	-0.12809	0.074	0.00011
YHR033W	YHR033W		0.84942	0.111	0.91416	0.062	-0.0654	0.111	0.00061
YHR034C	PIH1		0.67561	0.078	0.85519	0.127	-0.16684	0.078	0.00043
YHR035W	YHR035W		0.96359	0.127	1.0489	0.094	-0.10158	0.127	0.00062
YHR037W	PUT2		1.00887	0.155	0.98423	0.041	0.01725	0.155	0.00098
YHR039C	MSC7		0.98577	0.193	0.97609	0.069	0.0107	0.192	0.00199
YHR041C	SRB2		0.30689	0.058	0.27922	0.037	0.01649	0.058	0.00185
YHR043C	DOG2		0.92321	0.311	1.02871	0.023	-0.10716	0.311	0.00956
YHR044C	DOG1		1.09729	0.139	0.94957	0.04	0.14547	0.139	0.00055
YHR045W	YHR045W		1.02944	0.103	1.05675	0.05	-0.03622	0.102	0.00027
YHR046C	INM1		0.9426	0.101	0.96726	0.058	-0.02178	0.101	0.00034
YHR047C	AAP1		1.05266	0.067	1.01974	0.051	0.0209	0.067	7e-05
YHR048W	YHK8		0.98491	0.028	0.95216	0.063	0.0256	0.028	0.00027	status=JK
YHR049C-A	YHR049C-A		1.0534	0.002	1.0515	0.03	-0.00457	0.002	0	status=JK
YHR049W	FSH1		1.02248	0.04	0.94778	0.038	0.08452	0.039	2e-05
YHR050W	SMF2		0.94961	0.17	1.02704	0.056	-0.0751	0.169	0.00153
YHR057C	CPR2		1.12034	0.037	1.09828	0.049	0.01137	0.037	0.00036	status=JK
YHR059W	FYV4		0	0	0	0	0	0	#NUM!
YHR061C	GIC1		0.12173	0.103	0.26418	0.087	-0.1272	0.102	0.09827
YHR066W	SSF1		0.76789	0.004	0.74811	0.035	0.01249	0.004	1e-05	status=JK
YHR067W	HTD2		0.63163	0.22	0.55966	0.065	0.06156	0.22	0.01055
YHR073W	OSH3		1.16303	0.069	1.11274	0.029	0.05484	0.069	6e-05
YHR075C	PPE1		0.9722	0.167	1.01866	0.05	-0.05877	0.167	0.00136
YHR076W	PTC7		0.91163	0.037	0.92422	0.028	-0.00989	0.037	2e-05
YHR077C	NMD2		0.99372	0.067	0.93916	0.047	0.05206	0.067	8e-05
YHR078W	YHR078W		1.23283	0.073	1.1716	0.063	0.03993	0.073	6e-05
YHR079C	IRE1		1.12071	0.096	0.9969	0.013	0.12469	0.096	0.00017
YHR079C-B	YHR079C-B		1.13029	0.118	1.05568	0.035	0.076	0.118	0.00031
YHR080C	YHR080C		1.09486	0.031	1.02323	0.08	0.08341	0.031	1e-05
YHR081W	LRP1		0.70387	0.101	0.72761	0.072	-0.0504	0.101	0.00081
YHR082C	KSP1		0.9621	0.063	0.93915	0.019	0.02118	0.063	8e-05
YHR086W	NAM8		1.11484	0.177	1.11454	0.016	0.00099	0.177	0.00108
YHR087W	RTC3		0.8781	0.163	1.06403	0.013	-0.1925	0.162	0.0017
YHR092C	HXT4		0.97233	0.097	1.02927	0.012	-0.05218	0.097	0.00027
YHR093W	YHR093W		1.00998	0.051	1.00456	0.025	0.00982	0.051	4e-05
YHR094C	HXT1		1.02908	0.118	1.07082	0.006	-0.04585	0.118	0.00041
YHR095W	YHR095W		1.18519	0.111	1.10511	0.064	0.08781	0.111	0.00023
YHR096C	HXT5		1.06722	0.029	0.98797	0.048	0.08151	0.029	0.00025	status=JK
YHR097C	YHR097C		0.82332	0.193	1.0279	0.014	-0.20427	0.193	0.00338
YHR103W	SBE22		0.8	0.16	0.95817	0.03	-0.16049	0.16	0.00213
YHR104W	GRE3		1.09784	0.115	1.02939	0.019	0.06659	0.115	0.00031
YHR105W	YPT35		0.97224	0.016	0.99724	0.02	-0.03673	0.016	9e-05	status=JK
YHR106W	TRR2		0.91938	0.06	1.03746	0.08	-0.10386	0.06	8e-05
YHR108W	GGA2		0.91287	0.147	0.92043	0.098	-0.02982	0.146	0.00112
YHR109W	CTM1		0.98585	0.009	0.99898	0.042	-0.01421	0.009	3e-05	status=JK
YHR110W	ERP5		0.98204	0.024	1.04724	0.071	-0.04813	0.024	0.00021	status=JK
YHR111W	UBA4		0.93068	0.07	0.93645	0.041	-0.01523	0.07	0.00012
YHR112C	YHR112C		1.06572	0.262	1.05103	0.013	0.01662	0.262	0.0039
YHR113W	APE4		0.9583	0.264	0.95048	0.062	0.01857	0.264	0.0054
YHR114W	BZZ1		1.16083	0.024	1.13178	0.07	0.02333	0.024	0.00014	status=JK
YHR115C	DMA1		1.11548	0.141	1.00471	0.034	0.10823	0.141	0.00055
YHR116W	COX23		0.88104	0.045	0.79791	0.034	0.07649	0.045	4e-05
YHR117W	TOM71		1.01859	0.013	0.9609	0.015	0.05463	0.013	5e-05	status=JK
YHR121W	LSM12		1.0749	0.157	0.9678	0.034	0.10688	0.157	0.00084
YHR123W	EPT1		1.02023	0.078	0.98328	0.033	0.03399	0.078	0.00012
YHR124W	NDT80		0.91803	0.098	0.96944	0.033	-0.05312	0.098	0.00033
YHR125W	YHR125W		0.92281	0.203	1.01501	0.034	-0.09091	0.202	0.0028
YHR126C	ANS1		1.04449	0.029	0.9769	0.039	0.06337	0.029	0.00026	status=JK
YHR127W	YHR127W		0.82305	0.106	1.01789	0.076	-0.19791	0.105	0.00057
YHR129C	ARP1		0.98992	0.233	0.96629	0.068	0.01109	0.232	0.00341
YHR130C	YHR130C		0.88385	0.188	0.99739	0.029	-0.13167	0.187	0.00253
YHR131C	YHR131C		1.16356	0.132	1.04556	0.025	0.11018	0.132	0.0004
YHR132C	ECM14		1.20405	0.03	1.11214	0.028	0.09469	0.03	0.00021	status=JK
YHR132W-A	IGO2		0.92804	0.036	0.95185	0.003	-0.02691	0.036	2e-05
YHR133C	NSG1		0.95015	0.054	0.96711	0.029	-0.02841	0.053	5e-05
YHR134W	WSS1		0.90372	0.034	0.88313	0.034	0.02193	0.034	1e-05
YHR135C	YCK1		0.9278	0.144	1.00488	0.031	-0.08327	0.144	0.00102
YHR136C	SPL2		1.06473	0.074	1.09944	0.032	-0.03091	0.074	9e-05
YHR137W	ARO9		1.06254	0.027	1.05141	0.032	0.00718	0.027	0.00022	status=JK
YHR138C	YHR138C		1.13629	0.134	1.11216	0.029	0.02703	0.133	0.00044
YHR139C	SPS100		1.06149	0.228	1.01386	0.094	0.05775	0.228	0.00263
YHR139C-A	YHR139C-A		1.16035	0.01	1.10431	0.036	0.0563	0.01	3e-05	status=JK
YHR140W	YHR140W		1.09777	0.248	1.04372	0.018	0.05902	0.247	0.00303
YHR142W	CHS7		1.14327	0.061	1.09879	0.044	0.04488	0.061	4e-05
YHR143W	DSE2		0.53989	0.057	0.73987	0.075	-0.21191	0.056	0.00364	status=JK
YHR146W	CRP1		1.17646	0.092	1.15876	0.038	0.01849	0.092	0.00013
YHR150W	PEX28		1.02878	0.028	1.02786	0.04	-0.00245	0.028	1e-05
YHR151C	MTC6		1.00226	0.042	0.98495	0.043	0.00548	0.042	2e-05
YHR152W	SPO12		1.16183	0.01	1.10939	0.035	0.0429	0.01	0
YHR153C	SPO16		1.10312	0.09	1.03094	0.04	0.06829	0.09	0.00015
YHR154W	RTT107		0.91656	0.143	0.96125	0.061	-0.05191	0.143	0.00103
YHR155W	YSP1		1.16921	0.225	1.13475	0.053	0.02497	0.225	0.00191
YHR156C	LIN1		0.90892	0.119	0.88115	0.016	0.03375	0.118	0.0006
YHR157W	REC104		1.11733	0.111	1.0297	0.037	0.09567	0.111	0.00027
YHR158C	KEL1		0.80694	0.037	0.76487	0.023	0.03536	0.037	3e-05
YHR159W	TDA11		1.022	0.132	1.02099	0.045	-0.00653	0.131	0.00058
YHR160C	PEX18		1.11155	0.032	1.07535	0.049	0.04601	0.032	0.00027	status=JK
YHR161C	YAP1801		0.96019	0.192	0.99897	0.029	-0.03656	0.192	0.00214
YHR162W	MPC2		0.99472	0.106	1.00271	0.028	-0.00535	0.106	0.00033
YHR163W	SOL3		0.93078	0.032	0.90088	0.029	0.0351	0.032	1e-05
YHR167W	THP2		0.96086	0.08	0.90779	0.024	0.05595	0.079	0.00016
YHR171W	ATG7		0.92209	0.059	0.92157	0.017	0.00043	0.059	7e-05
YHR176W	FMO1		1.02496	0.184	1.00951	0.006	0.01105	0.184	0.00155
YHR178W	STB5		0.54641	0.088	0.50652	0.016	0.03405	0.088	0.00113
YHR179W	OYE2		1.08637	0.083	1.0601	0.03	0.02824	0.083	0.00012
YHR180W	YHR180W		1.21586	0.067	1.25255	0.049	-0.03814	0.067	5e-05
YHR181W	SVP26		1.18639	0.074	1.17725	0.004	0.00803	0.074	7e-05
YHR182W	YHR182W		1.08736	0.121	1.14169	0.06	-0.07133	0.12	0.00037
YHR184W	SSP1		1.02368	0.152	1.00681	0.041	0.01581	0.151	0.00088
YHR185C	PFS1		0.85343	0.209	0.95363	0.036	-0.10696	0.209	0.00386
YHR189W	PTH1		0.83288	0.093	0.6736	0.004	0.15907	0.093	0.00038
YHR191C	CTF8		0.95436	0.09	1.00135	0.043	-0.04335	0.09	0.00023
YHR193C	EGD2		0.00323	0.004	0	0	0.00323	0.004	0.23986
YHR194W	MDM31		0.04872	0.068	0.36642	0.22	-0.28327	0.068	0.34267	status=JK
YHR195W	NVJ1		1.1159	0.128	1.06355	0.022	0.05056	0.128	0.00041
YHR198C	AIM18		0.82575	0.143	0.65706	0.012	0.1662	0.143	0.0014
YHR199C	AIM46		0.96864	0.226	1.00247	0.004	-0.03604	0.226	0.00334
YHR200W	RPN10		0.85401	0.104	0.94565	0.024	-0.08939	0.104	0.00049
YHR202W	YHR202W		1.00073	0.174	1.04232	0.016	-0.04937	0.174	0.00141
YHR203C	RPS4B		0.7122	0.172	0.78021	0.054	-0.06177	0.171	0.00367
YHR204W	MNL1		1.0115	0.231	1.01402	0.052	-0.01896	0.231	0.00314
YHR206W	SKN7		1.13664	0.016	1.06556	0.007	0.07218	0.016	7e-05	status=JK
YHR207C	SET5		1.02941	0.112	0.99199	0.011	0.03462	0.112	0.00035
YHR209W	CRG1		1.00321	0.044	0.98407	0.002	0.01758	0.044	2e-05
YHR210C	YHR210C		0.98216	0.067	0.98314	0.048	-0.00886	0.067	9e-05
YIL001W	YIL001W		1.19867	0.052	1.03482	0.019	0.15778	0.052	0.00063	status=JK
YIL002C	INP51		1.0225	0.033	0.90492	0.019	0.10926	0.033	0.00034	status=JK
YIL005W	EPS1		1.00075	0.224	0.99703	0.071	-0.01121	0.223	0.00295
YIL006W	YIA6		0.78608	0.195	0.87817	0.002	-0.09368	0.195	0.00399
YIL007C	NAS2		0.89258	0.115	0.91131	0.005	-0.01877	0.115	0.00058
YIL008W	URM1		0.86598	0.217	0.85334	0.048	0.00142	0.217	0.00412
YIL009C-A	EST3		1.11658	0.049	1.05649	0.04	0.05552	0.049	2e-05
YIL010W	DOT5		1.02019	0.119	1.0137	0.014	-0.00224	0.119	0.00043
YIL011W	TIR3		0	0	0.00035	0	-0.00034	0	#NUM!
YIL012W	YIL012W		1.07854	0.15	1.07493	0.007	0.00312	0.15	0.00073
YIL013C	PDR11		1.07739	0.11	1.14438	0.071	-0.08272	0.11	0.00029
YIL014W	MNT3		1.06545	0.108	1.06924	0.02	-0.00624	0.108	0.00029
YIL015C-A	YIL015C-A		0.88482	0.172	0.94929	0.004	-0.06621	0.171	0.00195
YIL015W	BAR1		0.94347	0.189	0.9582	0.013	-0.01695	0.189	0.00215
YIL016W	SNL1		1.01616	0.024	1.14917	0.029	-0.13226	0.024	0.00018	status=JK
YIL017C	VID28		0.92037	0.201	0.99165	0.06	-0.07539	0.2	0.00274
YIL020C	HIS6		0.34516	0.061	0.31988	0.044	0.01972	0.061	0.00147
YIL023C	YKE4		1.0102	0.095	1.04171	0.007	-0.0298	0.095	0.00023
YIL024C	YIL024C		1.14789	0.027	1.16939	0.007	-0.02446	0.027	0.00019	status=JK
YIL025C	YIL025C		1.00474	0.132	0.99503	0.036	0.01496	0.132	0.00062
YIL027C	EMC5		1.06357	0.118	1.06461	0.069	-0.01645	0.118	0.00038
YIL028W	YIL028W		0.90526	0.234	0.97187	0.041	-0.06165	0.233	0.00448
YIL029C	YIL029C		1.0655	0.117	0.93206	0.059	0.12778	0.117	0.00036
YIL030C	SSM4		1.05491	0.192	1.09967	0.04	-0.05897	0.192	0.00162
YIL032C	YIL032C		1.03592	0.139	0.94175	0.018	0.0903	0.139	0.00066
YIL034C	CAP2		1.0516	0.101	1.05984	0.093	-0.00709	0.101	0.00024
YIL035C	CKA1		0.97505	0.009	1.03522	0.038	-0.06104	0.009	3e-05	status=JK
YIL036W	CST6		0.8625	0.011	0.93097	0.091	-0.05251	0.011	5e-05	status=JK
YIL037C	PRM2		0.94371	0.028	0.92302	0.023	0.01731	0.028	1e-05
YIL038C	NOT3		0.96303	0.01	0.97768	0.033	-0.02351	0.01	4e-05	status=JK
YIL039W	TED1		1.0574	0.079	0.96083	0.037	0.08852	0.079	0.00012
YIL040W	APQ12		0.25433	0.109	0.28888	0.015	-0.03418	0.109	0.01851
YIL041W	GVP36		1.10581	0.037	0.89396	0.109	0.21363	0.037	0.00037	status=JK
YIL042C	PKP1		0.8235	0.042	0.91304	0.042	-0.08234	0.042	0.00089	status=JK
YIL043C	CBR1		1.28612	0.222	1.15053	0.062	0.12953	0.221	0.00138
YIL044C	AGE2		0.81987	0.073	0.81646	0.03	0.00218	0.073	0.0002
YIL045W	PIG2		1.11869	0.165	1.11948	0.014	-0.0013	0.165	0.00087
YIL047C	SYG1		1.09817	0.018	1.09669	0.022	-0.00297	0.018	0
YIL049W	DFG10		0.9793	0.05	0.99404	0.023	-0.01606	0.05	4e-05
YIL050W	PCL7		1.05584	0.009	1.03247	0.057	0.02242	0.009	3e-05	status=JK
YIL052C	RPL34B		0.96639	0.039	0.98657	0.045	-0.02472	0.039	2e-05
YIL053W	RHR2		0.76744	0.078	0.75663	0.013	0.01045	0.078	0.00029
YIL054W	YIL054W		0.96656	0.12	1.06701	0.049	-0.08533	0.12	0.00052
YIL055C	YIL055C		0.78043	0.198	0.97169	0.053	-0.20293	0.198	0.00426
YIL056W	VHR1		0.86365	0.188	0.88361	0.086	-0.03624	0.188	0.00273
YIL057C	RGI2		1.02035	0.23	1.06478	0.01	-0.04876	0.229	0.00301
YIL058W	YIL058W		1.08518	0.055	1.00038	0.018	0.08272	0.055	4e-05
YIL059C	YIL059C		1.0649	0.132	1.0185	0.041	0.04111	0.132	0.00052
YIL060W	YIL060W		1.08629	0.069	1.04981	0.026	0.03179	0.069	7e-05
YIL064W	SEE1		0.88605	0.054	0.8974	0.04	-0.00584	0.054	6e-05
YIL065C	FIS1		0.78224	0.042	0.7654	0.022	0.02191	0.042	4e-05
YIL066C	RNR3		1.02162	0.078	1.03215	0.013	-0.01234	0.078	0.00012
YIL067C	YIL067C		0.93825	0.084	0.9293	0.072	0.02242	0.084	0.0002
YIL070C	MAM33		1.06153	0.014	1.04772	0.027	0.01861	0.014	6e-05	status=JK
YIL071C	PCI8		1.11955	0.065	1.05938	0.054	0.07314	0.065	5e-05
YIL072W	HOP1		1.02344	0.03	1.07632	0.01	-0.05527	0.03	1e-05
YIL073C	SPO22		0.84806	0.005	0.83241	0.065	0.02042	0.005	1e-05	status=JK
YIL074C	SER33		0.99463	0.041	1.01461	0.028	-0.01232	0.041	2e-05
YIL076W	SEC28		1.01589	0.018	1.01382	0.027	0.00247	0.018	0
YIL077C	YIL077C		0.85289	0.043	0.86907	0.03	-0.01957	0.042	3e-05
YIL079C	AIR1		1.05022	0.074	1.08652	0.048	-0.03367	0.073	9e-05
YIL084C	SDS3		0.76925	0.022	0.72957	0.066	0.02689	0.022	1e-05
YIL085C	KTR7		0.96992	0.033	0.92747	0.163	0.07802	0.033	1e-05
YIL086C	YIL086C		0.90416	0.032	0.8777	0.021	0.02828	0.032	1e-05
YIL087C	AIM19		0.99601	0.017	0.96984	0.007	0.0279	0.016	0
YIL088C	AVT7		1.08216	0.005	1.03207	0.007	0.05385	0.005	1e-05	status=JK
YIL089W	YIL089W		1.09252	0.076	1.11713	0.045	-0.03303	0.076	9e-05
YIL090W	ICE2		0.49595	0.079	0.55476	0.04	-0.05254	0.079	0.00108
YIL092W	YIL092W		0.89621	0.052	0.92272	0.013	-0.02225	0.052	5e-05
YIL093C	RSM25		1.01696	0.034	1.0477	0.031	-0.02855	0.034	1e-05
YIL094C	LYS12		0.34134	0.102	0.33846	0.118	0.01807	0.102	0.00681
YIL095W	PRK1		1.03921	0.006	1.08057	0.012	-0.04512	0.006	1e-05	status=JK
YIL096C	YIL096C		1.07674	0.103	1.06216	0.034	0.01471	0.102	0.00024
YIL097W	FYV10		0.856	0.049	0.90925	0.038	-0.04852	0.049	5e-05
YIL098C	FMC1		0.93478	0.037	0.86228	0.038	0.06803	0.036	2e-05
YIL099W	SGA1		1.10635	0.045	1.09152	0.046	0.01812	0.045	2e-05
YIL100W	YIL100W		1.05787	0.065	1.0339	0.035	0.04242	0.065	0.00128	status=JK
YIL101C	XBP1		1.01048	0.015	1.00023	0.043	0.00193	0.015	8e-05	status=JK
YIL102C	YIL102C		1.06502	0.034	1.10872	0.058	-0.05424	0.034	1e-05
YIL103W	DPH1		0.946	0.015	0.99493	0.059	-0.06188	0.015	9e-05	status=JK
YIL105C	SLM1		1.07312	0.044	1.06828	0.045	0.00504	0.044	2e-05
YIL107C	PFK26		1.00676	0.074	1.04102	0.068	-0.03454	0.074	0.00011
YIL108W	YIL108W		1.01506	0.068	1.02104	0.056	-0.00602	0.068	8e-05
YIL110W	HPM1		0.69479	0.016	0.72462	0.015	-0.03177	0.015	0
YIL111W	COX5B		0.81433	0.104	0.89752	0.111	-0.10445	0.104	0.00057
YIL112W	HOS4		0.85111	0.119	0.90599	0.008	-0.05743	0.119	0.00074
YIL113W	SDP1		0.94794	0.081	0.95172	0.009	-0.00484	0.081	0.00017
YIL114C	POR2		1.08344	0.102	1.03568	0.043	0.05985	0.102	0.00023
YIL116W	HIS5		0.41151	0.148	0.33743	0.126	0.06564	0.147	0.01137
YIL117C	PRM5		1.02492	0.102	1.04733	0.031	-0.01441	0.102	0.00027
YIL119C	RPI1		1.00057	0.053	1.0192	0.032	-0.01762	0.053	4e-05
YIL120W	QDR1		0.96416	0.07	1.03507	0.067	-0.05674	0.07	0.00011
YIL122W	POG1		0.94383	0.009	0.57485	0.166	0.34737	0.009	3e-05	status=JK
YIL123W	SIM1		1.05909	0.098	1.04375	0.061	0.02184	0.098	0.00022
YIL124W	AYR1		0.90843	0.164	0.94573	0.051	-0.04769	0.164	0.00159
YIL125W	KGD1		0.00763	0.009	0.01709	0.001	-0.00921	0.009	0.19339
YIL128W	MET18		0.87447	0.044	0.81432	0.035	0.05276	0.044	4e-05
YIL130W	ASG1		1.03476	0.067	1.02911	0.038	0.00866	0.067	7e-05
YIL131C	FKH1		0.96179	0.006	0.92662	0.219	0.02745	0.006	0
YIL132C	CSM2		0.83164	0.081	0.86662	0.043	-0.03749	0.08	0.00025
YIL133C	RPL16A		0.78533	0.035	0.82999	0.015	-0.04495	0.035	2e-05
YIL134W	FLX1		0.62442	0.078	0.60675	0.022	0.02934	0.078	0.00054
YIL135C	VHS2		1.13243	0.106	1.21053	0.008	-0.0773	0.106	0.00023
YIL136W	OM45		1.12474	0.093	1.21402	0.077	-0.09416	0.093	0.00016
YIL137C	TMA108		0.88811	0.06	0.89826	0.036	-0.00985	0.06	8e-05
YIL138C	TPM2		1.0271	0.047	0.94219	0.046	0.08082	0.047	3e-05
YIL139C	REV7		1.02086	0.017	1.04062	0.086	-0.00502	0.017	0.0001	status=JK
YIL140W	AXL2		1.06977	0.14	1.10706	0.062	-0.03165	0.14	0.00061
YIL141W	YIL141W		1.14947	0.078	1.14384	0.015	0.0076	0.078	9e-05
YIL145C	PAN6		0.90517	0.088	0.95049	0.005	-0.04221	0.088	0.00025
YIL146C	ATG32		1.05886	0.015	1.05275	0.062	-0.01038	0.015	0
YIL148W	RPL40A		0.962	0.033	0.98326	0.021	-0.01552	0.033	1e-05
YIL149C	MLP2		1.07755	0.055	1.01295	0.04	0.06632	0.055	4e-05
YIL151C	YIL151C		0.98513	0.072	0.97636	0.118	0.01301	0.072	0.00011
YIL152W	YIL152W		0.91324	0.115	0.89915	0.018	0.01689	0.114	0.00054
YIL153W	RRD1		0.83237	0.021	0.89236	0.06	-0.04592	0.021	0.00022	status=JK
YIL154C	IMP2'		0.89658	0.043	0.87261	0.035	0.02206	0.043	3e-05
YIL155C	GUT2		0.95165	0.012	0.99454	0.041	-0.03223	0.012	5e-05	status=JK
YIL156W	UBP7		1.12017	0.013	1.12546	0.019	-0.00584	0.013	5e-05	status=JK
YIL157C	COA1		0.90339	0.101	0.9606	0.021	-0.06722	0.101	0.00038
YIL158W	AIM20		1.03311	0.041	1.10213	0.191	-0.04449	0.041	2e-05
YIL159W	BNR1		0.92617	0.065	0.89661	0.034	0.04669	0.065	9e-05
[truncated: 2,323 more rows]

## Sheet: DMA LU Rep1
Array ORF	Array Name	Array annotation	Normalized colony size (EXPERIMENT)	Normalized colony std. dev. (EXPERIMENT)	Normalized colony size (CONTROL)	Normalized colony std. dev. (CONTROL)	Score	Score stdev	p-Value	Additional information
YAL002W	VPS8		0.81876	0.101	0.97017	0.111	-0.15976	0.101	0.00052
YAL004W	YAL004W		0.92777	0.093	1.02732	0.031	-0.09486	0.093	0.00027
YAL005C	SSA1		0.96392	0.066	0.96664	0.119	0.02357	0.066	9e-05
YAL007C	ERP2		1.04003	0.075	1.01044	0.093	0.03252	0.075	0.0001
YAL008W	FUN14		1.06746	0.026	1.06374	0.045	0.00451	0.026	0
YAL010C	MDM10		0.79078	0.041	0.75738	0.063	0.01649	0.041	4e-05
YAL011W	SWC3		0.98587	0.07	0.96453	0.011	0.02338	0.069	0.0001
YAL013W	DEP1		0.66786	0.1	0.59939	0.048	0.0528	0.1	0.00092
YAL014C	SYN8		1.03998	0.078	1.02224	0.073	0.02301	0.078	0.00011
YAL015C	NTG1		1.06353	0.006	1.01269	0.018	0.05229	0.006	1e-05	status=JK
YAL017W	PSK1		1.03967	0.024	1.11132	0.092	-0.06931	0.024	0
YAL018C	YAL018C		1.03272	0.075	0.97232	0.067	0.04174	0.075	0.00011
YAL019W	FUN30		1.03607	0.078	0.98907	0.115	0.02558	0.078	0.00012
YAL020C	ATS1		1.02086	0.06	0.98354	0.084	0.03051	0.06	6e-05
YAL022C	FUN26		0.96946	0.022	1.00155	0.089	-0.0262	0.022	0
YAL023C	PMT2		0.96094	0.004	1.05447	0.037	-0.09355	0.004	0	status=JK
YAL024C	LTE1		0.73545	0.118	0.91908	0.137	-0.19285	0.118	0.00112
YAL026C	DRS2		0.61331	0.063	0.58809	0.117	-0.00083	0.063	0.00029
YAL027W	SAW1		0.99743	0.058	1.00587	0.074	-0.01922	0.058	5e-05
YAL028W	FRT2		0.93682	0.053	1.06259	0.053	-0.1554	0.053	5e-05
YAL029C	MYO4		1.00429	0.108	1.03651	0.068	-0.02217	0.108	0.00034
YAL030W	SNC1		0.98139	0.066	0.9287	0.033	0.04549	0.066	8e-05
YAL031C	GIP4		1.03288	0.015	0.96845	0.018	0.06906	0.015	7e-05	status=JK
YAL034C	FUN19		1.043	0.07	1.0813	0.1	-0.06308	0.07	8e-05
YAL036C	RBG1		1.02604	0.05	0.98581	0.05	0.03831	0.05	3e-05
YAL037W	YAL037W		1.0456	0.046	1.03917	0.016	0.00653	0.045	2e-05
YAL040C	CLN3		0.92635	0.016	0.89424	0.05	0.02835	0.016	0.00011	status=JK
YAL042W	ERV46		1.05438	0.01	1.08496	0.007	-0.03071	0.01	0
YAL043C-A	YAL043C-A		0.98498	0.009	1.04965	0.054	-0.07299	0.009	0
YAL045C	YAL045C		0.98436	0.026	0.95233	0.078	0.01791	0.026	0
YAL046C	AIM1		1.01821	0.015	1.02425	0.042	0.01186	0.015	0
YAL048C	GEM1		0.98329	0.001	0.95887	0.028	0.02288	0.001	0
YAL049C	AIM2		1.04519	0.019	1.00744	0.06	0.03605	0.018	0
YAL051W	OAF1		0.95376	0.01	0.98819	0.08	-0.03083	0.01	4e-05	status=JK
YAL053W	FLC2		0.9951	0.058	1.07134	0.009	-0.08061	0.058	5e-05
YAL054C	ACS1		1.01851	0.034	1.05748	0.069	-0.0411	0.034	1e-05
YAL055W	PEX22		1.01464	0.021	1.06451	0.021	-0.05168	0.021	0.00014	status=JK
YAL056W	GPB2		0.97932	0.072	0.96667	0.052	0.00521	0.072	0.00011
YAL058C-A	YAL058C-A		0.95808	0.013	1.00556	0.039	-0.04623	0.013	6e-05	status=JK
YAL058W	CNE1		1.04284	0.02	1.06995	0.017	-0.02646	0.02	0
YAL059W	ECM1		0.99463	0.009	0.90982	0.062	0.09343	0.009	0
YAL060W	BDH1		0.98418	0.055	0.98946	0.05	-0.01053	0.055	5e-05
YAL061W	BDH2		1.06384	0.042	1.07079	0.052	-0.00962	0.042	0.00051	status=JK
YAL062W	GDH3		1.03533	0.037	1.06229	0.026	-0.01322	0.037	1e-05
YAL064C-A	TDA8		1.01871	0.024	1.04306	0.03	-0.02886	0.024	0.00019	status=JK
YAL065C	YAL065C		1.03418	0.019	0.94142	0.02	0.10073	0.019	0.00011	status=JK
YAL066W	YAL066W		0.99865	0.055	1.01997	0.038	-0.02126	0.055	5e-05
YAL067C	SEO1		1.02174	0.078	1.10322	0.058	-0.06558	0.078	0.00012
YAL068C	PAU8		0.94541	0.022	1.01562	0.017	-0.07205	0.022	0.00018	status=JK
YAR002C-A	ERP1		1.03365	0.004	1.09159	0.038	-0.05888	0.004	0	status=JK
YAR002W	NUP60		1.01408	0.005	1.01599	0.064	-0.01787	0.005	1e-05	status=JK
YAR003W	SWD1		0.86217	0.046	0.80035	0.044	0.0712	0.046	4e-05
YAR014C	BUD14		0.77299	0.035	0.82977	0.089	-0.07083	0.035	3e-05
YAR015W	ADE1		1.03599	0.04	1.05885	0.009	-0.02715	0.04	2e-05
YAR018C	KIN3		0.92852	0.041	1.0047	0.097	-0.08958	0.041	2e-05
YAR020C	PAU7		1.01486	0.039	0.8787	0.091	0.13831	0.039	2e-05
YAR023C	YAR023C		1.10137	0.051	1.04747	0.091	0.05635	0.051	3e-05
YAR027W	UIP3		1.01532	0.004	0.97364	0.094	0.028	0.004	0	status=JK
YAR028W	YAR028W		1.02964	0.039	0.97571	0.049	0.04862	0.039	2e-05
YAR029W	YAR029W		1.01487	0.035	1.0257	0.051	-0.02223	0.035	1e-05
YAR030C	YAR030C		1.0077	0.028	1.00905	0.068	-0.00744	0.028	1e-05
YAR031W	PRM9		1.03079	0.04	0.95647	0.034	0.07359	0.04	2e-05
YAR035W	YAT1		1.03336	0.053	1.0916	0.127	-0.0825	0.053	4e-05
YAR037W	YAR037W		1.00025	0.051	1.02835	0.086	-0.00587	0.051	4e-05
YAR040C	YAR040C		1.00991	0.067	0.98644	0.114	0.04169	0.067	8e-05
YAR042W	SWH1		1.01382	0.045	1.09403	0.012	-0.08554	0.045	2e-05
YAR043C	YAR043C		0.98801	0.036	0.9923	0.076	-0.00257	0.036	1e-05
YAR044W	YAR044W		1.05588	0.044	1.0822	0.053	-0.02565	0.044	2e-05
YAR047C	YAR047C		1.00424	0.033	0.87963	0.112	0.12512	0.033	1e-05
YAR050W	FLO1		1.12949	0.015	0.99294	0.086	0.12193	0.015	6e-05	status=JK
YBL001C	ECM15		1.02897	0.049	1.03086	0.082	0.00683	0.049	3e-05
YBL003C	HTA2		1.04083	0.019	0.95972	0.193	0.04676	0.019	0
YBL005W	PDR3		1.0259	0.035	0.95605	0.09	0.05079	0.035	1e-05
YBL007C	SLA1		0.71197	0.02	0.85231	0.114	-0.16632	0.02	0.00026	status=JK
YBL008W	HIR1		1.04485	0.019	1.05068	0.297	-0.04063	0.019	0
YBL009W	ALK2		1.00082	0.014	1.00082	0.069	0.00532	0.014	7e-05	status=JK
YBL010C	YBL010C		0.99599	0.021	1.02016	0.072	-0.00996	0.021	0.00016	status=JK
YBL011W	SCT1		0.82124	0.069	0.73769	0.191	0.12601	0.069	0.00016
YBL013W	FMT1		0.96741	0.077	0.77554	0.089	0.1843	0.077	0.00014
YBL015W	ACH1		1.01067	0.061	1.10277	0.178	-0.05192	0.061	6e-05
YBL016W	FUS3		0.93456	0.04	0.98925	0.099	-0.05347	0.04	2e-05
YBL017C	PEP1		0.94249	0.053	1.01959	0.016	-0.08199	0.053	5e-05
YBL019W	APN2		0.94679	0.107	1.04256	0.031	-0.10143	0.107	0.0004
YBL021C	HAP3		0.81563	0.013	0.88984	0.129	-0.03168	0.013	9e-05	status=JK
YBL024W	NCL1		1.01407	0.03	1.0205	0.022	-0.00334	0.03	1e-05
YBL025W	RRN10		0.18004	0.007	0.16228	0.006	0.01607	0.007	1e-05
YBL027W	RPL19B		0.52816	0.018	0.76608	0.551	-0.25921	0.018	0.00039	status=JK
YBL028C	YBL028C		1.06538	0.049	0.97452	0.023	0.10015	0.049	3e-05
YBL029W	YBL029W		1.06054	0.081	1.01958	0.02	0.04186	0.081	0.00012
YBL031W	SHE1		0.28032	0.155	0.49279	0.09	-0.20698	0.155	0.03657
YBL032W	HEK2		1.02297	0.009	0.95165	0.065	0.08509	0.009	0
YBL036C	YBL036C		0.99186	0.01	0.97533	0.066	0.02893	0.01	3e-05	status=JK
YBL037W	APL3		1.01781	0.003	0.99315	0.025	0.02068	0.003	0	status=JK
YBL039C	URA7		0.99422	0.008	0.95863	0.073	0.01858	0.008	2e-05	status=JK
YBL042C	FUI1		1.04468	0.042	1.03668	0.009	0.00581	0.041	2e-05
YBL043W	ECM13		1.0673	0.005	0.99811	0.062	0.06233	0.005	0
YBL046W	PSY4		1.08147	0.017	1.10578	0.05	-0.01451	0.017	8e-05	status=JK
YBL047C	EDE1		1.02319	0.022	1.03795	0.038	-0.01856	0.022	0.00015	status=JK
YBL048W	YBL048W		1.02153	0.054	0.99524	0.048	0.0347	0.054	4e-05
YBL049W	MOH1		0.95278	0.09	0.96287	0.075	-0.00313	0.09	0.00023
YBL051C	PIN4		0.99932	0.005	1.03161	0.015	-0.03093	0.005	1e-05	status=JK
YBL052C	SAS3		0.92104	0.031	0.89809	0.046	0.0366	0.031	1e-05
YBL053W	YBL053W		0.98395	0.037	1.01215	0.095	-0.01464	0.037	1e-05
YBL054W	TOD6		0.98263	0.022	0.96879	0.058	0.00296	0.022	0
YBL055C	YBL055C		0.99926	0.024	0.89026	0.106	0.07577	0.024	0
YBL056W	PTC3		1.04111	0.002	1.0383	0.009	0.00066	0.002	0	status=JK
YBL057C	PTH2		1.02279	0.045	1.07068	0.034	-0.04245	0.045	2e-05
YBL059W	YBL059W		0.9519	0.027	0.86289	0.081	0.066	0.027	0.00028	status=JK
YBL060W	YEL1		0.96326	0.012	0.89224	0.121	0.05558	0.012	0
YBL061C	SKT5		0.95947	0.035	0.9968	0.041	-0.02999	0.035	1e-05
YBL062W	YBL062W		0.97279	0.062	1.008	0.02	-0.03135	0.062	7e-05
YBL063W	KIP1		1.04956	0.041	1.0664	0.074	-0.01533	0.041	2e-05
YBL064C	PRX1		1.00254	0.001	0.99858	0.061	-0.01103	0.001	0	status=JK
YBL065W	YBL065W		1.02305	0.023	1.01469	0.106	-0.01676	0.022	0.00016	status=JK
YBL066C	SEF1		0.94814	0.005	1.03064	0.112	-0.05379	0.005	1e-05	status=JK
YBL067C	UBP13		1.03256	0.05	0.96714	0.06	0.07492	0.05	3e-05
YBL068W	PRS4		1.06065	0.007	1.05776	0.098	0.0046	0.007	0
YBL069W	AST1		1.00587	0.024	1.03553	0.104	-0.0135	0.024	0
YBL070C	YBL070C		0.9705	0.013	0.98961	0.079	0.00088	0.013	6e-05	status=JK
YBL071C	YBL071C		0.96488	0.059	0.94865	0.076	0.04647	0.059	6e-05
YBL072C	RPS8A		0.46822	0.014	0.34853	0.072	0.11476	0.014	0.00029	status=JK
YBL075C	SSA3		1.01162	0.042	1.0077	0.082	-0.01483	0.042	2e-05
YBL078C	ATG8		0.93021	0.103	0.76321	0.111	0.15806	0.103	0.00037
YBL079W	NUP170		0.64693	0.026	0.41518	0.039	0.23223	0.026	0.00054	status=JK
YBL081W	YBL081W		0.95549	0.036	1.01969	0.062	-0.06584	0.036	1e-05
YBL082C	ALG3		1.06806	0.043	1.05857	0.068	0.02028	0.043	2e-05
YBL083C	YBL083C		1.10231	0.068	1.17728	0.009	-0.07061	0.068	7e-05
YBL085W	BOI1		1.09567	0.065	0.96104	0.022	0.13892	0.065	6e-05
YBL086C	YBL086C		1.04073	0.022	1.015	0.057	0.02367	0.022	0
YBL087C	RPL23A		0.90626	0.039	0.95516	0.075	-0.06192	0.039	2e-05
YBL088C	TEL1		1.04269	0.017	1.04198	0.044	-0.00116	0.017	0
YBL089W	AVT5		0.88727	0.021	0.90433	0.015	-0.01447	0.021	0.00018	status=JK
YBL091C	MAP2		1.03577	0.069	0.99817	0.011	0.03296	0.069	8e-05
YBL091C-A	SCS22		0.974	0.08	1.02608	0.012	-0.05444	0.08	0.00015
YBL094C	YBL094C		0.9032	0.09	0.72511	0.25	0.14173	0.09	0.00333	status=JK
YBL095W	YBL095W		0.96021	0.028	0.87426	0.069	0.08871	0.028	1e-05
YBL096C	YBL096C		0.99223	0.014	1.03744	0.121	-0.03465	0.014	0
YBL098W	BNA4		0.96346	0.031	1.01008	0.017	-0.04917	0.031	1e-05
YBL100C	YBL100C		1.02133	0.032	1.06427	0.049	-0.03661	0.032	1e-05
YBL101C	ECM21		1.02395	0.052	0.9723	0.004	0.05076	0.052	4e-05
YBL102W	SFT2		0.97243	0.019	0.96719	0.012	0.00302	0.019	0
YBL103C	RTG3		0.21998	0.07	0.25192	0.018	-0.03343	0.07	0.00827
YBL103C	RTG3		1.06423	0.001	1.05231	0.01	0.01073	0.001	0	status=JK
YBL104C	SEA4		1.03194	0.027	0.99394	0.102	0.0408	0.027	0
YBL106C	SRO77		0.97966	0.009	1.01714	0.059	-0.04175	0.009	3e-05	status=JK
YBL107C	MIC23		0.99342	0.015	0.99557	0.087	0.00723	0.015	0
YBR001C	NTH2		1.01273	0.034	0.94271	0.034	0.07391	0.034	1e-05
YBR005W	RCR1		1.06435	0.019	1.0858	0.054	-0.02573	0.019	0
YBR006W	UGA2		1.06983	0.037	1.16544	0.063	-0.05887	0.037	1e-05
YBR007C	DSF2		1.04917	0.076	1.1164	0.053	-0.0604	0.076	0.0001
YBR008C	FLR1		1.008	0.039	1.09192	0.058	-0.07279	0.039	2e-05
YBR009C	HHF1		0.96744	0.055	0.98986	0.173	-0.0661	0.055	5e-05
YBR010W	HHT1		0.99284	0.096	1.04901	0.049	-0.03969	0.096	0.00025
YBR012C	YBR012C		0.9954	0.045	0.98571	0.153	0.04006	0.045	3e-05
YBR013C	YBR013C		0.95329	0.012	0.86652	0.197	0.06136	0.012	5e-05	status=JK
YBR014C	GRX7		0.90535	0.14	0.96985	0.043	-0.04401	0.14	0.00099
YBR015C	MNN2		0.95542	0.044	0.93528	0.098	0.00499	0.044	0.00071	status=JK
YBR016W	YBR016W		0.87029	0.024	0.83522	0.132	0.04299	0.024	1e-05
YBR018C	GAL7		0.96575	0.026	1.02563	0.026	-0.07336	0.026	0.00024	status=JK
YBR019C	GAL10		1.01769	0.027	0.96247	0.14	0.05556	0.027	1e-05
YBR020W	GAL1		1.01776	0.055	1.01346	0.059	0.00951	0.055	4e-05
YBR020W	GAL1		0.97871	0.075	1.0396	0.072	-0.06243	0.075	0.00013
YBR022W	POA1		0.96673	0.05	1.00013	0.066	-0.03047	0.05	4e-05
YBR023C	CHS3		0.96671	0.028	1.01316	0.012	-0.0494	0.028	1e-05
YBR024W	SCO2		0.98486	0.019	0.94347	0.107	0.02407	0.019	0.00012	status=JK
YBR025C	OLA1		0.94478	0.008	1.01768	0.065	-0.08553	0.008	3e-05	status=JK
YBR026C	ETR1		0.71152	0.076	0.79744	0.005	-0.08474	0.076	0.00033
YBR027C	YBR027C		1.08949	0.057	1.10327	0.041	-0.00857	0.057	4e-05
YBR028C	YPK3		1.10917	0.078	1.02032	0.137	0.05683	0.078	0.0001
YBR030W	RKM3		1.11365	0.036	1.21165	0.075	-0.10184	0.036	1e-05
YBR031W	RPL4A		0.97796	0.009	1.00892	0.05	-0.05496	0.009	3e-05	status=JK
YBR032W	YBR032W		0.99923	0.068	0.97548	0.061	0.02081	0.068	9e-05
YBR033W	EDS1		0.99806	0.039	1.00621	0.03	-0.00536	0.039	2e-05
YBR034C	HMT1		1.03126	0.004	1.08	0.085	-0.06875	0.004	1e-05	status=JK
YBR036C	CSG2		0.27037	0.104	0.17518	0.006	0.09576	0.103	0.01365
YBR040W	FIG1		1.0539	0.018	1.07612	0.036	-0.02088	0.018	0
YBR041W	FAT1		0.94463	0.071	0.98568	0.093	-0.0193	0.071	0.00012
YBR042C	CST26		0.99298	0.013	0.99396	0.01	-0.00189	0.013	6e-05	status=JK
YBR043C	QDR3		1.00319	0.012	1.03226	0.001	-0.02856	0.012	5e-05	status=JK
YBR044C	TCM62		0.96629	0.041	0.98682	0.054	-0.01311	0.041	2e-05
YBR045C	GIP1		0.97693	0.026	0.98561	0.026	-0.01232	0.026	1e-05
YBR046C	ZTA1		1.04342	0.083	1.08303	0.018	-0.03222	0.083	0.00014
YBR047W	FMP23		0.98951	0.008	1.03094	0.047	-0.03828	0.008	2e-05	status=JK
YBR048W	RPS11B		0.88646	0.016	0.83676	0.032	0.04659	0.016	0
YBR050C	REG2		1.01865	0.016	1.03883	0.021	-0.02181	0.016	0
YBR051W	YBR051W		1.05965	0.06	1.09018	0.096	-0.00811	0.06	5e-05
YBR052C	RFS1		1.01467	0.01	1.01084	0.079	0.00443	0.01	3e-05	status=JK
YBR053C	YBR053C		1.06003	0.075	1.07706	0.068	-0.00216	0.075	0.0001
YBR054W	YRO2		1.01231	0.019	0.9405	0.16	0.06425	0.019	0.00012	status=JK
YBR056W	YBR056W		1.03519	0.048	1.08658	0.05	-0.03488	0.048	3e-05
YBR057C	MUM2		0.96215	0.003	1.02744	0.021	-0.05832	0.003	0	status=JK
YBR058C	UBP14		0.9304	0.026	0.84033	0.033	0.09475	0.026	1e-05
YBR059C	AKL1		0.87667	0.039	0.93548	0.045	-0.05766	0.039	2e-05
YBR061C	TRM7		0.89612	0.022	1.04348	0.143	-0.18356	0.022	0.0002	status=JK
YBR061C	TRM7		0.67017	0.1	0.68189	0.069	-0.01366	0.1	0.00089
YBR062C	YBR062C		1.03572	0.03	0.97564	0.084	0.05178	0.03	1e-05
YBR063C	YBR063C		1.03861	0.047	1.03807	0.027	0.00428	0.047	3e-05
YBR064W	YBR064W		1.01792	0.014	1.06776	0.069	-0.0455	0.014	0
YBR065C	ECM2		1.04108	0.019	1.10421	0.045	-0.05862	0.019	0
YBR066C	NRG2		1.06019	0.044	0.97939	0.02	0.08247	0.044	2e-05
YBR067C	TIP1		1.12771	0.073	1.02907	0.165	0.10752	0.073	8e-05
YBR068C	BAP2		0.99822	0.007	1.03855	0.017	-0.03556	0.007	1e-05	status=JK
YBR069C	TAT1		1.05448	0.039	0.96534	0.013	0.09639	0.039	1e-05
YBR071W	YBR071W		1.01741	0.043	0.99198	0.062	0.02261	0.043	2e-05
YBR072W	HSP26		1.06736	0.077	1.05478	0.097	0.01401	0.077	0.0001
YBR073W	RDH54		0.98494	0.015	0.91198	0.031	0.06901	0.015	0
YBR074W	YBR074W		1.02815	0.044	1.00564	0.053	0.02319	0.044	2e-05
YBR075W	YBR075W		1.03137	0.025	0.99125	0.051	0.03438	0.025	0
YBR075W	YBR075W		1.01694	0.019	1.02258	0.014	-0.00668	0.019	0
YBR076W	ECM8		0.97697	0.035	0.89379	0.044	0.09021	0.035	1e-05
YBR077C	SLM4		1.02695	0.018	1.05976	0.015	-0.03179	0.018	0
YBR078W	ECM33		1.06345	0.013	1.12211	0.089	-0.04938	0.013	0
YBR082C	UBC4		1.06394	0.145	1.02195	0.085	0.06609	0.144	0.00068
YBR082C	UBC4		1.05712	0.022	1.04998	0.077	0.0093	0.022	0
YBR083W	TEC1		1.03059	0.07	1.11283	0.135	-0.03828	0.07	9e-05
YBR084C-A	RPL19A		0.7707	0.146	0.95766	0.067	-0.15722	0.146	0.00183
YBR084W	MIS1		0.94648	0.046	0.99432	0.038	-0.04748	0.046	3e-05
YBR085W	AAC3		1.02133	0.011	0.99416	0.071	0.01166	0.011	4e-05	status=JK
YBR086C	IST2		0.92921	0.035	0.94045	0.052	-0.00697	0.035	1e-05
YBR090C	YBR090C		0.88669	0.035	0.88647	0.131	0.03876	0.035	2e-05
YBR090C-A	YBR090C-A		0.95536	0.02	0.87018	0.116	0.08157	0.02	0
YBR092C	PHO3		1.05011	0.047	0.9772	0.046	0.07116	0.047	2e-05
YBR093C	PHO5		0.66658	0.074	0.49787	0.088	0.16288	0.074	0.00037
YBR094W	PBY1		0.98476	0.021	0.9857	0.023	-0.00026	0.021	0
YBR095C	RXT2		0.4518	0.033	0.40267	0.087	0.02152	0.033	0.0001
YBR095C	RXT2		0.70374	0.129	0.51035	0.13	0.21246	0.129	0.00165
YBR098W	MMS4		1.06365	0.027	1.03964	0.083	0.02855	0.027	0
YBR099C	YBR099C		0.96935	0.005	0.92822	0.174	0.01853	0.005	1e-05	status=JK
YBR100W	YBR100W		0.93361	0.08	0.99169	0.055	-0.04818	0.08	0.00018
YBR101C	FES1		0.9929	0.006	0.99688	0.009	7e-05	0.006	1e-05	status=JK
YBR103W	SIF2		0.7675	0.056	0.6478	0.122	0.1389	0.056	0.00011
YBR104W	YMC2		0.92371	0.065	0.92665	0.035	-0.02206	0.065	9e-05
YBR105C	VID24		1.02304	0.037	1.05262	0.082	-0.01521	0.037	1e-05
YBR106W	PHO88		0.02072	0.024	0.03194	0.037	-0.0102	0.024	0.27498	status=JK
YBR107C	IML3		0.96546	0.016	0.96075	0.081	0.0004	0.016	0.0001	status=JK
YBR108W	AIM3		0.95227	0.009	0.83284	0.061	0.11521	0.009	0
YBR111C	YSA1		0.9831	0.014	1.00562	0.063	-0.00638	0.014	0
YBR113W	YBR113W		1.04725	0.015	1.03113	0.007	0.01742	0.015	0
YBR114W	RAD16		0.99036	0.032	0.98134	0.088	0.02243	0.032	0.00035	status=JK
YBR115C	LYS2		0.07469	0.003	0.07799	0.017	0.00068	0.003	0.0007	status=JK
YBR115C	LYS2		0.21078	0.019	0.11658	0.02	0.08773	0.019	0.00021
YBR116C	YBR116C		1.02112	0.088	1.0126	0.113	-0.0034	0.088	0.00017
YBR118W	TEF2		0.80033	0.027	0.71648	0.043	0.08479	0.026	1e-05
YBR119W	MUD1		0.95957	0.093	1.00167	0.123	-0.06049	0.092	0.00025
YBR121C	GRS1		0.96188	0.021	1.00092	0.034	-0.0444	0.021	0
YBR122C	MRPL36		1.03372	0.07	0.96008	0.123	0.06654	0.07	9e-05
YBR125C	PTC4		1.08311	0.031	1.09971	0.026	-0.01143	0.031	1e-05
YBR126C	TPS1		0.82668	0.021	0.95314	0.176	-0.08143	0.021	0
YBR128C	ATG14		0.93589	0.047	0.97501	0.065	-0.04973	0.047	3e-05
YBR129C	OPY1		0.91451	0.006	0.91254	0.051	-0.00685	0.006	1e-05	status=JK
YBR130C	SHE3		1.01955	0.009	1.05384	0.081	-0.03259	0.009	2e-05	status=JK
YBR131W	CCZ1		0.65837	0.025	0.62553	0.104	0.03786	0.025	2e-05
YBR132C	AGP2		1.07339	0.097	1.08649	0.05	-0.0165	0.097	0.0002
YBR134W	YBR134W		1.02774	0.015	0.97824	0.053	0.05204	0.015	7e-05	status=JK
YBR137W	YBR137W		0.78776	0.014	0.57696	0.142	0.23939	0.014	0.0001	status=JK
YBR138C	YBR138C		1.11556	0.103	1.1822	0.039	-0.07025	0.103	0.00022
YBR139W	YBR139W		1.04903	0.089	1.09306	0.058	-0.04711	0.089	0.00017
YBR141C	YBR141C		0.97078	0.021	1.06633	0.094	-0.10978	0.021	0.00015	status=JK
YBR144C	YBR144C		1.06508	0.038	0.93517	0.116	0.11426	0.038	1e-05
YBR145W	ADH5		0.79825	0.062	0.65205	0.021	0.1476	0.062	0.00013
YBR146W	MRPS9		1.01477	0.058	0.98688	0.065	0.04688	0.058	5e-05
YBR147W	RTC2		1.08873	0.031	1.04581	0.088	0.01921	0.031	1e-05
YBR148W	YSW1		1.06823	0.017	1.03999	0.014	0.02765	0.017	0
YBR149W	ARA1		0.99445	0.024	1.00688	0.06	0.00413	0.024	0
YBR150C	TBS1		1.03019	0.034	0.98351	0.014	0.05442	0.034	1e-05
YBR151W	APD1		0.90554	0.007	0.88681	0.011	0.02138	0.007	2e-05	status=JK
YBR156C	SLI15		1.00579	0.007	0.95982	0.041	0.04226	0.007	2e-05	status=JK
YBR157C	ICS2		1.00521	0.042	1.01953	0.032	-0.01979	0.042	2e-05
YBR158W	AMN1		1.01778	0.071	0.95665	0.078	0.06059	0.071	9e-05
YBR159W	IFA38		1.03026	0.033	1.04646	0.045	-0.01614	0.033	1e-05
YBR161W	CSH1		1.05197	0.044	1.01269	0.011	0.04086	0.044	2e-05
YBR162C	TOS1		1.03575	0.006	1.05572	0.04	-0.02774	0.006	1e-05	status=JK
YBR162W-A	YSY6		1.00117	0.029	1.01311	0.023	-0.01048	0.028	1e-05
YBR164C	ARL1		0.98203	0.054	1.01374	0.038	-0.03783	0.054	5e-05
YBR165W	UBS1		0.99899	0.033	1.00668	0.036	-0.00736	0.033	1e-05
YBR165W	UBS1		1.05322	0.033	1.0615	0.027	-0.01389	0.033	1e-05
YBR166C	TYR1		0.95758	0.039	0.97354	0.15	-0.02824	0.039	2e-05
YBR168W	PEX32		1.0593	0.09	1.00788	0.137	0.07366	0.09	0.00017
YBR169C	SSE2		0.93306	0.057	0.83545	0.02	0.10846	0.057	6e-05
YBR170C	NPL4		0.50745	0.198	0.28416	0.037	0.23753	0.197	0.0143
YBR171W	SEC66		0.8966	0.017	0.927	0.018	-0.02438	0.017	0.00012	status=JK
YBR172C	SMY2		0.90457	0.088	0.9043	0.074	0.01232	0.088	0.00025
YBR174C	YBR174C		0.95305	0.047	1.03188	0.003	-0.07973	0.047	3e-05
YBR175W	SWD3		0.90241	0.016	0.93362	0.025	-0.0358	0.016	0
YBR176W	ECM31		1.0091	0.024	0.92915	0.093	0.04099	0.024	0.00019	status=JK
YBR177C	EHT1		1.00847	0.047	0.96255	0.075	0.03009	0.047	3e-05
YBR178W	YBR178W		1.03806	0.05	1.11304	0.07	-0.05972	0.05	3e-05
YBR180W	DTR1		0.95838	0.033	0.86355	0.038	0.09494	0.033	0.0004	status=JK
YBR181C	RPS6B		0.56256	0.109	0.53331	0.175	0.01442	0.109	0.00193
YBR182C	SMP1		1.05542	0.051	1.03448	0.03	0.03628	0.051	3e-05
YBR183W	YPC1		1.0561	0.088	1.01811	0.09	0.02092	0.088	0.00016
YBR184W	YBR184W		0.99863	0.037	1.04043	0.09	-0.02798	0.037	1e-05
YBR185C	MBA1		0.92396	0.035	0.85936	0.053	0.06817	0.035	1e-05
YBR186W	PCH2		1.01903	0.029	1.00268	0.073	0.01621	0.029	1e-05
YBR187W	GDT1		1.03607	0.041	1.03523	0.062	0.00101	0.041	2e-05
YBR188C	NTC20		1.00654	0.074	1.07714	0.081	-0.05202	0.074	0.00011
YBR189W	RPS9B		0.20819	0.074	0.20197	0.014	0.00726	0.074	0.011
YBR194W	AIM4		0.82882	0.05	0.4385	0.014	0.39629	0.05	6e-05
YBR195C	MSI1		1.0513	0.113	1.0701	0.023	-0.02338	0.113	0.00034
YBR197C	YBR197C		1.06034	0.017	1.03471	0.022	0.03256	0.017	0
YBR199W	KTR4		1.03427	0.003	1.11426	0.03	-0.09099	0.003	0	status=JK
YBR200W	BEM1		0.89351	0.065	0.74797	0.131	0.11013	0.065	0.0001
YBR201W	DER1		0.96786	0.037	0.80809	0.039	0.16285	0.037	2e-05
YBR203W	COS111		1.04899	0.036	1.06439	0.001	-0.01524	0.036	1e-05
YBR204C	LDH1		1.06992	0.046	1.08814	0.113	-0.0084	0.046	2e-05
YBR205W	KTR3		0.99782	0.029	1.05756	0.045	-0.06209	0.029	1e-05
YBR206W	YBR206W		1.00123	0.007	1.03008	0.088	-0.01427	0.007	1e-05	status=JK
YBR207W	FTH1		1.07105	0.112	1.06584	0.109	0.0122	0.111	0.00031
YBR208C	DUR1		1.04498	0.062	1.07008	0.072	-0.01927	0.062	6e-05
YBR209W	YBR209W		1.03431	0.018	1.17896	0.136	-0.15607	0.018	0.0001	status=JK
YBR210W	ERV15		0.98279	0.046	1.0123	0.051	-0.03627	0.046	3e-05
YBR212W	NGR1		1.04312	0.072	0.93868	0.069	0.12723	0.072	9e-05
YBR213W	MET8		1.04752	0.04	1.01421	0.005	0.03129	0.04	2e-05
YBR214W	SDS24		1.02095	0.043	1.01135	0.094	0.02166	0.043	2e-05
YBR215W	HPC2		1.18529	0.051	1.28297	0.058	-0.08431	0.051	2e-05
YBR216C	YBP1		1.00184	0.05	0.99467	0.076	0.00528	0.05	3e-05
YBR217W	ATG12		1.01991	0.034	1.02879	0.071	-0.01539	0.034	1e-05
YBR218C	PYC2		1.02099	0.032	0.97123	0.089	0.05189	0.032	1e-05
YBR219C	YBR219C		0.95283	0.082	0.96879	0.036	-0.00653	0.081	0.00017
YBR220C	YBR220C		1.04564	0.035	0.98755	0.141	0.03249	0.035	1e-05
YBR221C	PDB1		0.82701	0.079	0.7313	0.075	0.11178	0.079	0.00024
YBR222C	PCS60		1.00456	0.014	1.02542	0.079	-0.01513	0.014	6e-05	status=JK
YBR223C	TDP1		0.96748	0.005	1.04849	0.046	-0.08326	0.005	1e-05	status=JK
YBR224W	YBR224W		1.04847	0.025	1.08953	0.025	-0.04284	0.025	0.0002	status=JK
YBR225W	YBR225W		1.04604	0.031	1.04011	0.077	0.00193	0.031	1e-05
YBR226C	YBR226C		1.02542	0.075	0.95048	0.024	0.06146	0.075	0.00011
YBR227C	MCX1		0.91066	0.025	1.01964	0.07	-0.10718	0.025	0.00025	status=JK
YBR228W	SLX1		0.98745	0.05	1.05337	0.044	-0.06171	0.05	4e-05
YBR229C	ROT2		0.99213	0.04	1.06412	0.085	-0.09008	0.04	2e-05
YBR230C	OM14		0.97946	0.117	1.02639	0.042	-0.04603	0.117	0.00046
YBR231C	SWC5		0.5043	0.086	0.53653	0.091	-0.03337	0.086	0.00133
YBR232C	YBR232C		0.98967	0.047	1.0213	0.069	-0.04717	0.047	3e-05
YBR233W	PBP2		0.93679	0.041	0.97842	0.005	-0.03961	0.041	2e-05
YBR235W	VHC1		1.00146	0.056	0.98712	0.044	0.01798	0.056	5e-05
YBR238C	YBR238C		0.89756	0.104	0.82888	0.081	0.0703	0.104	0.00043
YBR239C	ERT1		1.02019	0.033	1.01065	0.076	-0.00596	0.033	1e-05
YBR240C	THI2		1.03757	0.015	1.06866	0.1	-0.01215	0.015	7e-05	status=JK
YBR241C	YBR241C		1.00335	0.059	1.04695	0.072	-0.02534	0.059	6e-05
YBR242W	YBR242W		1.10099	0.028	1.02271	0.017	0.08275	0.028	0
YBR244W	GPX2		1.04915	0.017	1.07813	0.061	-0.0287	0.017	9e-05	status=JK
YBR245C	ISW1		1.06699	0.111	1.12791	0.079	-0.05817	0.111	0.00031
YBR246W	RRT2		0.97111	0.044	0.97789	0.024	-0.01535	0.044	3e-05
YBR248C	HIS7		0.13978	0.003	0.21899	0.039	-0.08812	0.003	0.00017	status=JK
YBR249C	ARO4		0.96646	0.043	0.94668	0.023	0.01322	0.043	2e-05
YBR250W	SPO23		0.97057	0.003	1.04842	0.052	-0.09026	0.003	0	status=JK
YBR255W	MTC4		0.92754	0.022	1.03693	0.059	-0.11982	0.022	0.00019	status=JK
YBR258C	SHG1		1.02585	0.045	1.06016	0.039	-0.02511	0.045	2e-05
YBR259W	YBR259W		1.02391	0.016	1.04922	0.014	-0.02794	0.016	8e-05	status=JK
YBR260C	RGD1		1.06669	0.048	1.05067	0.005	0.01372	0.048	3e-05
YBR261C	TAE1		1.01084	0.026	1.02	0.039	-0.02341	0.026	0.00021	status=JK
YBR262C	AIM5		0.95032	0.075	1.0159	0.088	-0.05032	0.075	0.00013
YBR263W	SHM1		0.99954	0.05	0.96841	0.025	0.0274	0.05	3e-05
YBR264C	YPT10		1.01315	0.096	1.01711	0.06	-0.01481	0.096	0.00023
YBR266C	YBR266C		0.55774	0.122	0.67276	0.044	-0.10522	0.122	0.00279
YBR267W	REI1		0.384	0.03	0.53333	0.11	-0.16182	0.03	0.00013
YBR269C	FMP21		1.00103	0.035	0.96494	0.045	0.0476	0.035	1e-05
YBR270C	BIT2		0.93373	0.07	0.91816	0.197	-0.0182	0.07	0.00012
YBR271W	EFM2		1.02748	0.001	1.00489	0.073	0.02726	0.001	0	status=JK
YBR272C	HSM3		0.98757	0.059	1.00634	0.06	-0.02709	0.059	6e-05
YBR273C	UBX7		1.0959	0.067	1.09594	0.062	-0.00205	0.067	6e-05
YBR274W	CHK1		1.00156	0.038	0.99078	0.029	0.01023	0.038	2e-05
YBR275C	RIF1		1.00552	0.025	0.93345	0.108	0.0462	0.025	0
YBR276C	PPS1		0.94582	0.084	0.93156	0.117	0.02709	0.084	0.00019
YBR277C	YBR277C		1.01079	0.05	0.9037	0.006	0.1042	0.05	3e-05
YBR278W	DPB3		1.03922	0.021	0.89524	0.03	0.13695	0.021	0.00013	status=JK
YBR280C	SAF1		0.97338	0.015	1.04579	0.09	-0.08303	0.015	7e-05	status=JK
YBR281C	DUG2		1.01861	0.031	0.97793	0.048	0.04796	0.031	1e-05
YBR283C	SSH1		1.02066	0.01	0.85967	0.02	0.16703	0.01	4e-05	status=JK
YBR284W	YBR284W		0.95746	0.021	0.89049	0.024	0.07091	0.021	0.00017	status=JK
YBR285W	YBR285W		1.02847	0.026	1.0109	0.046	0.00622	0.026	0
YBR286W	APE3		1.01199	0.016	0.95166	0.009	0.05926	0.016	8e-05	status=JK
YBR287W	YBR287W		0.91837	0.03	0.93834	0.071	-0.02583	0.03	1e-05
YBR288C	APM3		0.86474	0.025	0.89889	0.02	-0.0319	0.025	0.00029	status=JK
YBR289W	SNF5		0.32746	0.076	0.49282	0.056	-0.16704	0.076	0.00325
YBR290W	BSD2		0.9696	0.061	1.03426	0.079	-0.0462	0.061	7e-05
YBR291C	CTP1		0.99121	0.065	0.95456	0.056	0.02919	0.065	8e-05
YBR292C	YBR292C		0.99226	0.087	0.95972	0.081	0.03317	0.087	0.00018
YBR293W	VBA2		0.95729	0.026	0.90975	0.019	0.04375	0.026	0.00026	status=JK
YBR294W	SUL1		0	0	0.02118	0.037	0	0	#NUM!	status=JK
YBR295W	PCA1		0.96454	0.028	0.97517	0.027	-0.00479	0.028	1e-05
YBR296C	PHO89		1.05463	0.022	1.00338	0.023	0.0477	0.022	0.00015	status=JK
YBR297W	MAL33		0.98203	0.024	0.94276	0.031	0.03686	0.024	0
YBR298C	MAL31		0.96398	0.014	0.98015	0.031	-0.01512	0.014	0
YBR299W	MAL32		0.98686	0.009	0.9705	0.026	0.02476	0.009	0
YBR300C	YBR300C		1.01906	0.005	1.01506	0.026	0.0028	0.005	1e-05	status=JK
YBR301W	PAU24		0.97158	0.029	1.03364	0.083	-0.06158	0.029	1e-05
YCL001W	RER1		1.02328	0.017	1.05402	0.008	-0.0352	0.017	0
YCL001W-A	YCL001W-A		1.06208	0.004	1.01363	0.089	0.067	0.004	0	status=JK
YCL002C	YCL002C		1.086	0.095	1.0753	0.166	0.01999	0.095	0.00018
YCL006C	YCL006C		0.98325	0.022	0.98882	0.087	-0.02034	0.021	0
YCL009C	ILV6		1.04829	0.056	1.0685	0.074	-0.00165	0.056	4e-05
YCL010C	SGF29		0.86793	0.067	0.79719	0.015	0.06484	0.067	0.00013
YCL011C	GBP2		0.9948	0.048	1.03733	0.068	-0.04121	0.048	3e-05
YCL012W	YCL012W		1.02093	0.049	1.00665	0.054	0.0256	0.049	3e-05
YCL013W	YCL013W		0.96632	0.025	0.82464	0.072	0.14122	0.025	0.00022	status=JK
YCL014W	BUD3		1.02891	0.047	0.93262	0.094	0.10575	0.047	0.0007	status=JK
YCL016C	DCC1		0.97288	0.022	0.8889	0.073	0.0837	0.022	0.00018	status=JK
YCL022C	YCL022C		0.91705	0.11	0.93136	0.229	-0.07548	0.11	0.00046
YCL023C	YCL023C		0.97189	0.127	0.97395	0.088	0.00751	0.127	0.0006
YCL024W	KCC4		0.96486	0.228	0.9652	0.027	0.00027	0.228	0.00348
YCL025C	AGP1		0.94977	0.067	0.99763	0.012	-0.05013	0.067	0.0001
YCL026C	YCL026C		1.09275	0.057	0.99303	0.054	0.11154	0.057	4e-05
YCL026C-A	FRM2		1.01906	0.041	1.02814	0.024	0.00101	0.041	2e-05
YCL027W	FUS1		1.03892	0.065	0.95389	0.072	0.06978	0.065	7e-05
YCL028W	RNQ1		1.02946	0.075	1.05944	0.071	-0.02315	0.075	0.00011
YCL029C	BIK1		0.93225	0.014	0.90916	0.04	0.02402	0.014	0
YCL030C	HIS4		0.14603	0.004	0.28309	0.029	-0.13133	0.004	1e-05
YCL032W	STE50		0.48287	0.078	0.60138	0.047	-0.10768	0.077	0.00112
YCL033C	MXR2		0.97166	0.013	1.03715	0.004	-0.06294	0.013	6e-05	status=JK
YCL034W	LSB5		0.96595	0.094	0.97363	0.038	-0.00774	0.094	0.00025
YCL035C	GRX1		1.03804	0.012	1.03618	0.003	0.00335	0.012	0
YCL036W	GFD2		1.03457	0.044	0.9982	0.024	0.03413	0.044	2e-05
YCL037C	SRO9		0.6193	0.197	0.79236	0.119	-0.16965	0.197	0.00813
YCL038C	ATG22		1.01144	0.061	1.03802	0.088	-0.01431	0.061	6e-05
YCL039W	GID7		1.02462	0.068	1.02213	0.041	0.01139	0.068	8e-05
YCL040W	GLK1		0.99203	0.056	1.01562	0.031	-0.01641	0.056	5e-05
YCL042W	YCL042W		1.01265	0.021	1.03093	0.029	-0.0209	0.021	0
YCL044C	MGR1		0.79494	0.108	0.83998	0.052	-0.02783	0.108	0.00068
YCL045C	EMC1		1.07926	0.077	1.05002	0.078	0.03446	0.077	0.0001
YCL046W	YCL046W		1.01346	0.074	0.99498	0.009	0.02299	0.074	0.00011
YCL047C	POF1		0.99087	0.082	1.00284	0.054	-0.02178	0.082	0.00016
YCL048W	SPS22		0.99442	0.037	0.96431	0.058	0.02423	0.037	1e-05
YCL049C	YCL049C		0.98471	0.054	0.95879	0.059	0.01607	0.054	5e-05
YCL050C	APA1		1.0066	0.048	0.97884	0.052	0.02463	0.048	3e-05
YCL051W	LRE1		1.04802	0.03	1.00838	0.005	0.04113	0.03	1e-05
YCL055W	KAR4		0.93649	0.048	0.98572	0.025	-0.05165	0.048	4e-05
YCL056C	PEX34		1.05878	0.054	0.989	0.026	0.07282	0.054	4e-05
YCL057W	PRD1		1.05962	0.075	1.0767	0.051	-0.01435	0.075	0.0001
YCL060C	YCL060C		0.9668	0.044	0.91075	0.094	0.02776	0.044	0.00071	status=JK
YCL061C	MRC1		0.9503	0.092	1.00355	0.1	-0.04104	0.092	0.00025
YCL062W	YCL062W		0.99335	0.028	0.98938	0.028	0.00628	0.028	0.00026	status=JK
YCL063W	VAC17		0.99961	0.043	0.97077	0.029	0.02662	0.043	2e-05
YCL064C	CHA1		1.04462	0.112	1.06838	0.073	0.00062	0.112	0.00033
YCL069W	VBA3		0.95706	0.088	1.04466	0.099	-0.06354	0.088	0.00022
YCL074W	YCL074W		0.86238	0.09	0.89684	0.16	0.01608	0.09	0.00031
YCL075W	YCL075W		0.96902	0.014	0.99953	0.032	-0.03984	0.014	0
YCL076W	YCL076W		0.98513	0.048	0.97968	0.082	0.006	0.048	3e-05
YCR001W	YCR001W		1.10709	0.041	1.09486	0.023	0.01193	0.041	1e-05
YCR005C	CIT2		1.02327	0.035	1.04543	0.045	-0.0246	0.035	1e-05
YCR006C	YCR006C		0.94626	0.019	0.96567	0.024	-0.0147	0.019	0
YCR007C	YCR007C		1.06695	0.014	1.12036	0.008	-0.05063	0.014	6e-05	status=JK
YCR008W	SAT4		0.99459	0.021	1.04892	0.039	-0.05202	0.021	0
YCR009C	RVS161		0.54952	0.086	0.9052	0.021	-0.35464	0.086	0.00104
YCR010C	ADY2		1.07636	0.043	1.03194	0.081	0.03693	0.043	2e-05
YCR011C	ADP1		1.06734	0.004	1.06182	0.039	0.0047	0.004	0
YCR014C	POL4		1.07313	0.045	1.17833	0.012	-0.10083	0.045	2e-05
YCR015C	YCR015C		1.03058	0.048	1.00889	0.017	0.01366	0.048	3e-05
YCR016W	YCR016W		0.99228	0.006	1.0458	0.016	-0.06139	0.006	1e-05	status=JK
YCR017C	CWH43		1.05221	0.024	1.05574	0.022	-0.00564	0.024	0
YCR019W	MAK32		1.00115	0.008	0.95855	0.036	0.03826	0.008	2e-05	status=JK
YCR020C	PET18		1.04661	0.013	1.10919	0.013	-0.06415	0.013	5e-05	status=JK
YCR020C-A	MAK31		1.03921	0.007	1.11264	0.036	-0.07536	0.007	1e-05	status=JK
YCR021C	HSP30		1.09779	0.035	1.08146	0.055	0.02979	0.035	1e-05
YCR022C	YCR022C		1.05042	0.05	1.06094	0.071	-0.02517	0.05	3e-05
YCR023C	YCR023C		1.06559	0.048	1.07415	0.004	-0.00686	0.048	3e-05
YCR024C-A	PMP1		1.02414	0.062	0.95922	0.019	0.06498	0.062	6e-05
YCR025C	YCR025C		1.07819	0.062	1.0335	0.041	0.04205	0.062	5e-05
YCR026C	NPP1		1.07431	0.008	1.08693	0.06	-0.00838	0.008	2e-05	status=JK
YCR027C	RHB1		1.03353	0.05	1.07334	0.104	-0.04808	0.05	3e-05
YCR028C-A	RIM1		0.7246	0.038	0.90956	0.074	-0.19225	0.038	4e-05
YCR030C	SYP1		1.00502	0.04	0.99203	0.056	0.01165	0.04	2e-05
YCR031C	RPS14A		1.00381	0.03	0.98839	0.091	0.03587	0.03	1e-05
YCR032W	BPH1		0.9852	0.039	0.94272	0.143	0.03053	0.039	0.00052	status=JK
YCR033W	SNT1		0.56312	0.008	0.62861	0.039	-0.0601	0.008	7e-05	status=JK
YCR034W	FEN1		1.00565	0.122	0.90879	0.086	0.08599	0.122	0.00049
YCR036W	RBK1		1.06187	0.05	1.0171	0.064	0.04762	0.05	3e-05
YCR037C	PHO87		1.04817	0.078	1.08908	0.046	-0.04727	0.078	0.00011
YCR043C	YCR043C		1.12293	0.07	1.18104	0.025	-0.06892	0.07	7e-05
YCR044C	PER1		1.08417	0.013	1.03249	0.046	0.04307	0.013	5e-05	status=JK
YCR045C	RRT12		1.03027	0.03	1.00423	0.055	0.03413	0.03	1e-05
YCR048W	ARE1		1.02328	0.054	1.04126	0.013	-0.0218	0.054	4e-05
YCR049C	YCR049C		1.01715	0.053	1.03817	0.037	-0.01374	0.053	4e-05
YCR050C	YCR050C		1.0427	0.054	1.03581	0.032	0.0002	0.054	0.00089	status=JK
YCR051W	YCR051W		1.06643	0.091	1.08697	0.042	-0.03087	0.091	0.00017
YCR053W	THR4		0.28776	0.008	0.24879	0.031	0.02976	0.008	0.00029	status=JK
YCR059C	YIH1		0.93622	0.167	0.96074	0.06	-0.03915	0.167	0.00153
YCR060W	TAH1		0.9022	0.182	1.05736	0.11	-0.16965	0.182	0.00217
YCR061W	YCR061W		1.06688	0.032	0.9319	0.016	0.13961	0.032	1e-05
YCR062W	YCR062W		1.03584	0.084	0.98578	0.099	0.05394	0.084	0.00015
YCR063W	BUD31		0.50469	0.062	0.56512	0.083	-0.06494	0.061	0.00049
YCR065W	HCM1		0.92639	0.047	0.97581	0.029	-0.05021	0.047	4e-05
YCR067C	SED4		0.95273	0.075	1.07782	0.029	-0.13226	0.075	0.00013
YCR068W	ATG15		0.99435	0.034	0.9868	0.002	0.00696	0.034	1e-05
YCR069W	CPR4		1.02532	0.026	1.06727	0.005	-0.04374	0.026	0.00021	status=JK
YCR071C	IMG2		0.36279	0.061	0.63516	0.072	-0.27098	0.06	0.00125
YCR073C	SSK22		1.00927	0.024	1.0319	0.029	-0.03037	0.024	0
YCR073W-A	SOL2		1.02045	0.036	1.03352	0.071	-0.01516	0.035	1e-05
YCR075C	ERS1		1.13273	0.01	1.07617	0.102	0.03441	0.01	3e-05	status=JK
YCR076C	FUB1		1.30328	0.064	1.15708	0.013	0.1419	0.064	3e-05
YCR077C	PAT1		0.86002	0.047	1.01923	0.095	-0.14566	0.047	5e-05
YCR079W	PTC6		1.07679	0.046	1.19792	0.017	-0.11204	0.046	2e-05
YCR081W	SRB8		0.75244	0.047	0.71552	0.043	0.04631	0.047	7e-05
YCR082W	AHC2		1.0237	0.061	1.0363	0.069	-0.01726	0.06	6e-05
YCR083W	TRX3		1.08091	0.039	1.0584	0.038	0.02356	0.039	1e-05
YCR085W	YCR085W		1.08169	0.019	1.05751	0.058	0.00556	0.019	0
YCR086W	CSM1		0.96823	0.023	0.99201	0.056	-0.03263	0.023	0.00018	status=JK
YCR087C-A	YCR087C-A		1.10847	0.013	0.97643	0.044	0.13008	0.013	4e-05	status=JK
YCR087W	YCR087W		1.06496	0.103	0.99672	0.077	0.09175	0.103	0.00025
YCR088W	ABP1		0.99006	0.034	1.04409	0.081	-0.04553	0.034	1e-05
YCR089W	FIG2		0.98255	0.033	1.01609	0.034	-0.02825	0.033	1e-05
YCR090C	YCR090C		1.05213	0.01	0.94549	0.067	0.12345	0.01	3e-05	status=JK
YCR091W	KIN82		1.04635	0.091	1.04992	0.01	-0.00701	0.091	0.00018
YCR092C	MSH3		1.10674	0.052	1.08013	0.067	0.0177	0.052	3e-05
YCR095C	OCA4		1.08998	0.018	1.05047	0.074	0.03053	0.018	0
YCR098C	GIT1		1.04945	0.028	1.04652	0.049	-0.00574	0.028	1e-05
YCR099C	YCR099C		1.05768	0.058	0.98807	0.07	0.07128	0.058	5e-05
YCR100C	YCR100C		1.08789	0.059	1.15829	0.124	-0.05563	0.059	4e-05
YCR101C	YCR101C		1.01512	0.049	1.0556	0.017	-0.03929	0.049	0.00079	status=JK
YCR102C	YCR102C		1.03149	0.049	1.04474	0.072	-0.00464	0.049	3e-05
YCR102W-A	YCR102W-A		1.04546	0.091	1.07902	0.053	-0.03409	0.091	0.00018
YCR105W	ADH7		0.8927	0.083	0.85305	0.043	0.03777	0.083	0.00022
YCR106W	RDS1		1.02841	0.01	0.9941	0.024	0.03524	0.01	0
YCR107W	AAD3		1.06604	0.049	1.05468	0.017	0.00695	0.049	3e-05
YDL001W	RMD1		0.87959	0.067	0.94674	0.094	-0.0354	0.067	0.00012
YDL002C	NHP10		0.90718	0.012	0.95073	0.019	-0.0449	0.012	0
YDL006W	PTC1		0.64067	0.091	0.85873	0.005	-0.21892	0.09	0.00076
YDL010W	GRX6		1.09504	0.024	1.16918	0.061	-0.05905	0.024	0
YDL011C	YDL011C		1.0387	0.049	1.08699	0.054	-0.05275	0.049	3e-05
YDL012C	YDL012C		1.03135	0.043	1.05385	0.129	-0.01852	0.043	2e-05
YDL013W	SLX5		0.28225	0.008	0.298	0.058	-0.02001	0.008	0.00027	status=JK
YDL018C	ERP3		1.03257	0.029	1.11646	0.013	-0.08803	0.029	1e-05
YDL019C	OSH2		1.0565	0.057	1.05237	0.01	-0.00024	0.057	4e-05
YDL020C	RPN4		0.63346	0.042	0.81506	0.033	-0.17453	0.042	8e-05
YDL023C	YDL023C		0.95654	0.007	0.96377	0.01	-0.00406	0.007	2e-05	status=JK
YDL024C	DIA3		1.00323	0.006	1.00997	0.024	-0.00586	0.006	1e-05	status=JK
YDL025C	RTK1		1.06603	0.048	1.04618	0.088	-0.00017	0.048	3e-05
YDL026W	YDL026W		1.08213	0.046	1.02434	0.006	0.05924	0.046	2e-05
YDL027C	YDL027C		0.99332	0.051	0.99014	0.081	0.00039	0.051	4e-05
YDL033C	SLM3		0.47356	0.064	0.67328	0.101	-0.18912	0.064	0.00068
YDL034W	YDL034W		1.14015	0.088	1.0315	0.184	0.11084	0.088	0.00013
YDL035C	GPR1		1.12008	0.039	1.10037	0.073	0.01459	0.039	1e-05
YDL036C	PUS9		1.05531	0.055	1.0703	0.052	-0.02315	0.055	4e-05
YDL037C	BSC1		1.00624	0.046	1.01804	0.071	-0.02926	0.046	3e-05
YDL038C	YDL038C		1.04105	0.008	1.05943	0.052	-0.02015	0.008	0
YDL039C	PRM7		1.07272	0.015	1.15047	0.097	-0.05343	0.015	7e-05	status=JK
YDL040C	NAT1		1.03556	0.008	1.04614	0.032	-0.00847	0.008	0
YDL041W	YDL041W		0	0	0	0	0	0	#NUM!
YDL042C	SIR2		0	0	0	0	0	0	#NUM!
YDL046W	NPC2		0.99098	0.022	1.02528	0.08	-0.05465	0.022	0
YDL048C	STP4		1.04706	0.059	1.04017	0.096	0.02455	0.059	5e-05
YDL050C	YDL050C		1.04389	0.061	0.95004	0.026	0.08461	0.061	6e-05
YDL051W	LHP1		1.04062	0.046	0.9573	0.037	0.07687	0.046	2e-05
YDL052C	SLC1		1.0285	0.022	0.98597	0.092	0.05823	0.021	0
YDL053C	PBP4		1.00945	0.019	0.99418	0.094	0.01464	0.019	0.00012	status=JK
YDL054C	MCH1		0.94857	0.04	0.98038	0.034	-0.03691	0.04	2e-05
YDL056W	MBP1		1.14965	0.042	1.12634	0.01	0.02227	0.042	1e-05
YDL059C	RAD59		1.06667	0.077	1.08931	0.043	-0.02104	0.077	0.0001
YDL061C	RPS29B		0.49426	0.017	0.65703	0.005	-0.16461	0.017	0.00038	status=JK
YDL062W	YDL062W		0.84074	0.072	0.95409	0.079	-0.11278	0.072	0.00017
YDL065C	PEX19		0.94207	0.055	0.95777	0.013	-0.01706	0.055	6e-05
YDL066W	IDP1		1.03897	0.036	1.07197	0.148	-0.06081	0.036	1e-05
YDL070W	BDF2		1.01652	0.071	1.01604	0.035	-0.00732	0.071	0.0001
YDL071C	YDL071C		0.98979	0.15	0.85998	0.174	0.09227	0.15	0.00094
YDL074C	BRE1		0.49043	0.106	0.59068	0.124	-0.12446	0.106	0.00267
YDL074C	BRE1		0.63095	0.041	0.42179	0.005	0.20783	0.041	7e-05
YDL076C	RXT3		0.90647	0.015	0.95179	0.034	-0.05676	0.015	0
YDL077C	VAM6		0.59956	0.025	0.77173	0.034	-0.1525	0.025	0.0006	status=JK
YDL078C	MDH3		1.00052	0.142	0.68488	0.184	0.3084	0.141	0.00077
YDL079C	MRK1		1.04525	0.109	1.02639	0.085	0.02331	0.109	0.00031
YDL080C	THI3		0.75597	0.101	1.01591	0.012	-0.26546	0.101	0.00066
YDL081C	RPP1A		0.56534	0.113	0.75607	0.102	-0.17547	0.113	0.00214
YDL082W	RPL13A		0.65929	0.071	0.87563	0.067	-0.21466	0.071	0.00035
YDL083C	RPS16B		0.68993	0.011	0.77516	0.015	-0.07794	0.011	8e-05	status=JK
YDL085W	NDE2		0.98003	0.054	1.09946	0.056	-0.11059	0.054	5e-05
YDL086W	YDL086W		1.07577	0.031	0.9775	0.014	0.10586	0.031	1e-05
YDL088C	ASM4		1.00921	0.053	0.99366	0.061	0.00566	0.053	4e-05
YDL089W	NUR1		0.96525	0.041	0.96885	0.04	-0.00338	0.041	2e-05
YDL090C	RAM1		0	0	0	0	0	0	#NUM!
YDL091C	UBX3		1.0097	0.013	1.02762	0.115	-0.04597	0.013	6e-05	status=JK
YDL093W	PMT5		0.98621	0.011	1.01505	0.047	-0.04444	0.011	4e-05	status=JK
YDL094C	YDL094C		1.00073	0.042	0.97998	0.07	0.03603	0.042	2e-05
YDL095W	PMT1		1.01627	0.044	0.96998	0.05	0.04488	0.044	2e-05
YDL096C	YDL096C		1.01049	0.079	1.04628	0.074	-0.04317	0.079	0.00013
YDL099W	BUG1		1.11102	0.006	1.04969	0.072	0.05867	0.006	1e-05	status=JK
YDL100C	GET3		0.80093	0.091	0.93438	0.02	-0.13198	0.091	0.0004
YDL104C	QRI7		0.74864	0.096	0.89417	0.06	-0.15163	0.096	0.00057
YDL106C	PHO2		0.99557	0.044	1.07709	0.045	-0.06923	0.044	2e-05
YDL109C	YDL109C		1.00664	0.013	1.00538	0.05	-0.0036	0.013	0
YDL110C	TMA17		0.9507	0.053	0.93011	0.042	0.02046	0.053	5e-05
YDL112W	TRM3		0.90981	0.11	0.87487	0.132	0.02931	0.11	0.00048
YDL113C	ATG20		0.97794	0.016	0.87931	0.145	0.07238	0.016	0
YDL114W	YDL114W		1.00763	0.036	1.01116	0	-0.00348	0.036	1e-05
YDL117W	CYK3		0.87781	0.032	0.87524	0.067	-0.00899	0.032	1e-05
YDL118W	YDL118W		0.9625	0.029	0.94538	0.057	0.01468	0.029	1e-05
YDL119C	YDL119C		0.91845	0.009	0.92817	0.021	-0.00464	0.009	4e-05	status=JK
YDL121C	YDL121C		0.91856	0.099	0.9206	0.078	0.0022	0.099	0.00035
YDL122W	UBP1		0.98513	0.01	0.98696	0.123	-0.02814	0.01	4e-05	status=JK
YDL123W	SNA4		0.99823	0.069	1.07743	0.104	-0.08461	0.069	9e-05
YDL124W	YDL124W		1.03371	0.028	1.03089	0.052	0.00676	0.028	1e-05
YDL125C	HNT1		1.00765	0.054	1.0686	0.047	-0.06075	0.054	4e-05
YDL127W	PCL2		0.98516	0.04	1.00684	0.046	-0.00836	0.039	2e-05
YDL128W	VCX1		0.99044	0.036	1.00008	0.029	-0.01464	0.036	1e-05
YDL129W	YDL129W		0.99097	0.062	0.93758	0.076	0.03975	0.062	7e-05
YDL130W	RPP1B		0.94185	0.017	1.01857	0.047	-0.08209	0.017	0
YDL130W-A	STF1		1.08536	0.082	1.09271	0.035	0.00231	0.082	0.00012
YDL131W	LYS21		1.07084	0.009	0.97595	0.132	0.05381	0.009	2e-05	status=JK
YDL133C-A	RPL41B		1.01929	0.097	0.98525	0.079	0.02417	0.097	0.00023
YDL133W	SRF1		1.01378	0.065	1.05096	0.061	-0.02929	0.064	7e-05
YDL134C	PPH21		1.02942	0.069	1.06552	0.141	-0.02441	0.069	8e-05
YDL134C-A	YDL134C-A		0.97837	0.038	1.01785	0.022	-0.03374	0.038	2e-05
YDL135C	RDI1		0.99126	0.083	1.00385	0.09	-0.01849	0.083	0.00016
YDL136W	RPL35B		0.84478	0.07	0.76148	0.2	0.14117	0.07	0.00015
YDL137W	ARF2		0.97205	0.014	0.97549	0.12	-0.02697	0.014	7e-05	status=JK
YDL138W	RGT2		1.09038	0.01	1.08986	0.059	0.01472	0.01	3e-05	status=JK
YDL142C	CRD1		0.80884	0.042	0.83774	0.032	-0.03431	0.041	4e-05
YDL144C	YDL144C		1.0139	0.038	0.99367	0.045	0.01766	0.038	1e-05
YDL146W	LDB17		1.08457	0.074	1.02096	0.058	0.05781	0.074	9e-05
YDL149W	ATG9		0.86223	0.202	0.90807	0.011	-0.04343	0.202	0.00337
YDL154W	MSH5		0.95163	0.023	1.0553	0.034	-0.08727	0.023	0.0002	status=JK
YDL155W	CLB3		0.94555	0.092	0.99807	0.053	-0.06642	0.092	0.00025
YDL156W	CMR1		0.92903	0.023	0.97949	0.042	-0.05251	0.023	0
YDL157C	YDL157C		0.86662	0.016	0.92155	0.003	-0.0559	0.016	0.00012	status=JK
YDL159W	STE7		0	0	0	0	0	0	#NUM!
YDL160C	DHH1		0	0	0	0	0	0	#NUM!
YDL161W	ENT1		1.02967	0.011	0.97885	0.004	0.04994	0.011	4e-05	status=JK
YDL162C	YDL162C		1.09078	0.028	1.08588	0.02	0.00899	0.028	0
YDL167C	NRP1		0.9693	0.015	0.97314	0.034	0.00523	0.015	8e-05	status=JK
YDL168W	SFA1		0.9556	0.055	1.03513	0.063	-0.08073	0.055	5e-05
YDL169C	UGX2		1.02669	0.07	1.01032	0.007	0.01298	0.07	9e-05
YDL170W	UGA3		1.02899	0.062	1.03716	0.073	-0.01854	0.062	6e-05
YDL171C	GLT1		1.05949	0.086	1.09255	0.022	-0.03603	0.086	0.00014
YDL172C	YDL172C		0.91431	0.051	1.00033	0.027	-0.09683	0.051	5e-05
YDL173W	PAR32		0.86506	0.031	0.95681	0.019	-0.0981	0.031	1e-05
YDL174C	DLD1		1.04453	0.01	1.06285	0.049	-0.02826	0.01	3e-05	status=JK
YDL175C	AIR2		0.95504	0.004	0.90865	0.026	0.04402	0.004	0
YDL176W	YDL176W		1.07854	0.056	1.14758	0.131	-0.08818	0.056	4e-05
YDL177C	YDL177C		1.09642	0.088	1.08382	0.1	0.03518	0.088	0.00014
YDL178W	DLD2		1.07895	0.079	1.07058	0.092	0.02946	0.079	0.00011
YDL179W	PCL9		1.05139	0.042	1.12459	0.006	-0.07606	0.042	2e-05
YDL180W	YDL180W		0.87766	0.178	0.85741	0.189	-0.0036	0.178	0.00223
YDL181W	INH1		0.98129	0.058	1.03048	0.045	-0.04346	0.058	6e-05
YDL182W	LYS20		0.91277	0.064	0.9741	0.103	-0.05396	0.064	9e-05
YDL183C	YDL183C		0.97836	0.022	0.94047	0.091	0.03835	0.022	0.00017	status=JK
YDL184C	RPL41A		1.05324	0.028	1.03367	0.059	0.0244	0.028	0.00023	status=JK
YDL185W	VMA1		0.95703	0.012	1.00772	0.106	-0.01944	0.012	0
YDL186W	YDL186W		1.01968	0.06	1.00075	0.101	0.0023	0.06	6e-05
YDL187C	YDL187C		0.98022	0.025	1.00229	0.066	-0.0143	0.025	0
YDL188C	PPH22		1.02094	0.061	1.02067	0.065	0.0056	0.061	6e-05
YDL189W	RBS1		0.97575	0.027	0.97211	0.04	0.00126	0.027	1e-05
YDL190C	UFD2		0.98252	0.044	0.98911	0.057	-0.01048	0.044	3e-05
YDL191W	RPL35A		0.85213	0.01	1.00538	0.007	-0.15316	0.01	4e-05	status=JK
YDL192W	ARF1		0.53698	0.072	0.36857	0.023	0.17403	0.072	0.00066
YDL194W	SNF3		1.0198	0.04	0.93576	0.005	0.08277	0.04	2e-05
YDL197C	ASF2		1.01444	0.018	0.98059	0.061	0.02467	0.018	0
YDL199C	YDL199C		0.99977	0.026	1.05378	0.053	-0.06386	0.026	0
YDL200C	MGT1		1.01097	0.051	0.99306	0.047	0.01719	0.051	4e-05
YDL201W	TRM8		1.0044	0.021	1.01036	0.036	-0.00976	0.021	0
YDL203C	ACK1		0.98544	0.01	0.99329	0.022	-0.00117	0.01	3e-05	status=JK
YDL204W	RTN2		1.01862	0.021	0.99622	0.071	0.00904	0.021	0
YDL206W	YDL206W		1.03051	0.023	1.0504	0.004	-0.02187	0.023	0
YDL210W	UGA4		1.0012	0.012	1.03871	0.029	-0.0374	0.012	0
YDL211C	YDL211C		1.04216	0.053	1.02541	0.024	0.01244	0.052	4e-05
YDL213C	NOP6		0.96941	0.027	1.00564	0.036	-0.04592	0.027	1e-05
YDL214C	PRR2		1.02719	0.031	0.97499	0.03	0.03596	0.031	1e-05
YDL215C	GDH2		1	0.019	0.9353	0.117	0.02335	0.019	0
YDL216C	RRI1		0.99978	0.025	0.98008	0.048	0.01569	0.025	0
YDL218W	YDL218W		0.98456	0.013	0.98093	0.041	0.00719	0.013	6e-05	status=JK
YDL219W	DTD1		0.99908	0.015	1.07486	0.088	-0.0757	0.015	7e-05	status=JK
YDL222C	FMP45		1.02017	0.02	1.0514	0.036	-0.03453	0.02	0
YDL223C	HBT1		1.02549	0.037	1.04769	0.039	-0.02669	0.037	1e-05
YDL224C	WHI4		1.06935	0.013	1.07663	0.064	-0.0125	0.013	5e-05	status=JK
YDL226C	GCS1		0.96288	0.028	0.99006	0.057	-0.01711	0.028	1e-05
YDL227C	HO		1.01368	0.013	0.99696	0.017	0.01294	0.013	5e-05	status=JK
YDL229W	SSB1		0.92022	0.043	0.81619	0.028	0.09216	0.043	3e-05
YDL230W	PTP1		1.0186	0.003	1.06451	0.021	-0.04843	0.003	0	status=JK
YDL231C	BRE4		1.02452	0.022	0.99023	0.026	0.03291	0.022	0
YDL232W	OST4		0.86528	0.027	0.8415	0.022	0.02414	0.027	1e-05
YDL233W	MFG1		1.02427	0.077	1.07322	0.026	-0.04672	0.076	0.00011
YDL234C	GYP7		0.9968	0.048	1.09993	0.053	-0.08843	0.048	3e-05
YDL236W	PHO13		0.99612	0.036	0.97006	0.17	0.04602	0.036	1e-05
YDL237W	AIM6		1.0651	0.021	1.03696	0.051	0.04114	0.021	0
YDL238C	GUD1		1.03264	0.04	0.95079	0.02	0.07974	0.04	2e-05
YDL239C	ADY3		0.99675	0.056	0.93754	0.049	0.0514	0.056	5e-05
YDL240W	LRG1		1.0287	0.016	0.94862	0.051	0.07988	0.016	8e-05	status=JK
YDL241W	YDL241W		1.03156	0.009	1.04087	0.065	-0.00673	0.009	3e-05	status=JK
YDL242W	YDL242W		1.0189	0.025	1.02229	0.062	-0.00996	0.025	0
YDL243C	AAD4		1.02897	0.025	1.02658	0.068	0.01128	0.025	0
YDR001C	NTH1		0.96827	0.012	0.91213	0.005	0.05863	0.012	6e-05	status=JK
YDR003W	RCR2		1.03658	0.02	0.96384	0.072	0.08005	0.02	0
YDR004W	RAD57		0.93498	0.067	0.80912	0.029	0.11473	0.067	0.0001
YDR005C	MAF1		1.01414	0.006	0.99165	0.024	0.02332	0.006	1e-05	status=JK
YDR006C	SOK1		0.9301	0.044	0.81808	0.064	0.12899	0.044	3e-05
YDR007W	TRP1		0.98806	0.006	1.08003	0.037	-0.08258	0.006	1e-05	status=JK
YDR008C	YDR008C		1.0189	0.071	0.9637	0.05	0.06208	0.071	9e-05
YDR009W	GAL3		0.98135	0.06	1.00003	0.119	-0.02624	0.06	6e-05
YDR010C	YDR010C		1.0782	0.058	1.08482	0.099	-0.00688	0.058	4e-05
YDR011W	SNQ2		1.02423	0.013	1.06621	0.027	-0.04414	0.013	0
YDR014W	RAD61		0.94681	0.011	0.99449	0.071	-0.05103	0.011	5e-05	status=JK
YDR015C	YDR015C		0.97573	0.068	0.93867	0.076	0.02968	0.068	9e-05
YDR018C	YDR018C		1.03837	0.022	0.95877	0.066	0.08291	0.022	0
YDR019C	GCV1		1.04678	0.012	0.9762	0.045	0.06267	0.012	5e-05	status=JK
YDR020C	DAS2		1.09264	0.029	1.09195	0.084	-0.00397	0.029	1e-05
YDR022C	ATG31		1.05549	0.018	1.03941	0.055	0.01606	0.018	0
YDR024W	YDR024W		0.92223	0.051	0.85491	0.155	0.06511	0.051	5e-05
YDR025W	RPS11A		0.86553	0.082	0.69023	0.172	0.14288	0.082	0.00023
YDR026C	NSI1		1.01395	0.011	1.02702	0	-0.01225	0.011	0
YDR029W	YDR029W		0.99726	0.039	0.95822	0.035	0.0593	0.039	2e-05
YDR030C	RAD28		1.04838	0.022	1.10303	0.074	-0.03552	0.022	0
YDR031W	MIC14		0.98485	0.025	0.98202	0.069	0.00217	0.025	0.00022	status=JK
YDR032C	PST2		0.97178	0.005	0.94928	0.014	0.01959	0.005	0
YDR033W	MRH1		0.97406	0.058	0.94426	0.141	-0.00207	0.058	6e-05
YDR034C	LYS14		0.26229	0.073	0.22223	0.019	0.03931	0.073	0.00554
YDR035W	ARO3		1.09614	0.08	1.02519	0.088	0.0766	0.08	0.00011
YDR036C	EHD3		0.95716	0.016	0.98294	0.079	-0.01952	0.016	0
YDR042C	YDR042C		1.09178	0.052	1.12112	0.009	-0.0332	0.052	3e-05
YDR043C	NRG1		1.03396	0.025	1.03198	0.035	-0.00696	0.025	0
YDR046C	BAP3		1.03196	0.018	0.98244	0.062	0.04356	0.018	0
YDR048C	YDR048C		0.77917	0.019	1.08322	0.089	-0.28365	0.019	0.00019	status=JK
YDR049W	VMS1		0.93993	0.011	0.93006	0.121	-0.0012	0.011	4e-05	status=JK
YDR051C	DET1		0.99266	0.07	1.01348	0.126	0.01209	0.07	9e-05
YDR055W	PST1		1.09997	0.055	1.11179	0.074	0.00726	0.055	3e-05
YDR056C	YDR056C		1.01507	0.023	0.97047	0.063	0.04745	0.023	0
YDR057W	YOS9		1.11172	0.057	1.19639	0.071	-0.07988	0.057	4e-05
YDR058C	TGL2		1.02068	0.024	0.91751	0.017	0.1104	0.024	0
YDR059C	UBC5		1.13998	0.003	1.21863	0.065	-0.08066	0.003	0	status=JK
YDR061W	YDR061W		1.05039	0.007	1.04155	0.069	0.02335	0.007	1e-05	status=JK
YDR063W	AIM7		0.96316	0.039	0.97952	0.051	-0.02835	0.039	2e-05
YDR066C	RTR2		1.03696	0.018	0.95256	0.149	0.05536	0.018	0
YDR067C	OCA6		0.99751	0.046	1.10766	0.086	-0.11421	0.046	3e-05
YDR068W	DOS2		1.02118	0.07	0.9507	0.231	0.0172	0.07	0.00158	status=JK
YDR070C	FMP16		0.95386	0.032	1.03537	0.095	-0.06781	0.032	0.00036	status=JK
YDR071C	PAA1		0.9413	0.021	0.7906	0.095	0.1266	0.021	0
YDR072C	IPT1		0.97864	0.085	0.94801	0.023	0.03515	0.085	0.00018
YDR073W	SNF11		1.09892	0.004	1.04251	0.096	0.04999	0.004	0
YDR074W	TPS2		1.00496	0.018	1.1368	0.042	-0.13629	0.018	0
YDR075W	PPH3		1.0065	0.027	0.87388	0.042	0.13946	0.027	0.00023	status=JK
YDR076W	RAD55		0.89116	0.013	0.84027	0.124	0.04152	0.013	0
YDR077W	SED1		1.03633	0.046	1.00661	0.105	0.01909	0.046	2e-05
YDR080W	VPS41		0.79851	0.015	0.88778	0.09	-0.09838	0.014	0
YDR083W	RRP8		0.73014	0.003	0.47003	0.014	0.26233	0.003	0	status=JK
YDR084C	TVP23		1.03104	0.006	0.98074	0.012	0.04914	0.006	1e-05	status=JK
YDR085C	AFR1		0.9925	0.018	1.00493	0.069	-0.02319	0.018	0.0001	status=JK
YDR089W	YDR089W		1.01543	0.016	1.1104	0.01	-0.09956	0.016	0
YDR090C	YDR090C		1.01506	0.024	1.04622	0.044	-0.02792	0.024	0
YDR092W	UBC13		0.90466	0.048	0.88183	0.133	0.01317	0.048	4e-05
YDR093W	DNF2		1.03325	0.04	1.07285	0.027	-0.02452	0.04	2e-05
YDR094W	YDR094W		1.00104	0.02	1.04952	0.021	-0.0461	0.02	0
YDR095C	YDR095C		1.02323	0.022	1.05638	0.014	-0.03972	0.022	0
YDR096W	GIS1		1.04454	0.034	1.08424	0.016	-0.04205	0.034	1e-05
YDR097C	MSH6		1.02015	0.06	1.01611	0.031	-0.00235	0.06	5e-05
YDR098C	GRX3		0.99814	0.015	1.04059	0.106	-0.02495	0.015	8e-05	status=JK
YDR099W	BMH2		0.93351	0.038	0.94429	0.017	-0.0185	0.038	2e-05
YDR100W	TVP15		1.04808	0.049	0.98963	0.06	0.04546	0.049	3e-05
YDR101C	ARX1		0.88175	0.025	0.85157	0.051	0.04256	0.025	1e-05
YDR102C	YDR102C		0.97714	0.014	1.02989	0.048	-0.05286	0.014	0
YDR103W	STE5		0	0	0	0	0	0	#NUM!
YDR104C	SPO71		1.01145	0.005	0.98685	0.05	0.0272	0.005	1e-05	status=JK
YDR105C	TMS1		1.02592	0.017	1.04335	0.024	-0.01054	0.017	0
YDR107C	TMN2		0.97926	0.03	0.95737	0.008	0.02191	0.03	1e-05
YDR108W	TRS85		0.9071	0.023	0.92026	0.024	-0.00923	0.023	0
YDR109C	YDR109C		1.08752	0.057	1.05118	0.022	0.02953	0.057	4e-05
YDR110W	FOB1		0.97756	0.086	1.02023	0.102	-0.05727	0.086	0.00018
YDR111C	ALT2		1.01165	0.02	1.00401	0.022	0.01486	0.02	0
YDR112W	YDR112W		1.02702	0.025	1.05335	0.083	-0.02371	0.025	0
YDR116C	MRPL1		0.71616	0.041	0.59249	0.078	0.12113	0.041	5e-05
YDR117C	TMA64		1.01689	0.028	1.00991	0.025	0.00046	0.028	1e-05
YDR119W	VBA4		1.01617	0.028	0.99583	0.087	0.03277	0.028	1e-05
YDR120C	TRM1		0.97973	0.004	0.92482	0.18	0.03596	0.004	1e-05	status=JK
YDR121W	DPB4		0.97884	0.027	0.98691	0.053	0.00038	0.027	1e-05
YDR122W	KIN1		1.08262	0.036	1.10149	0.08	-0.03397	0.036	1e-05
YDR123C	INO2		0.85062	0.028	0.72701	0.061	0.12824	0.028	1e-05
YDR124W	YDR124W		1.08766	0.019	1.03653	0.102	0.05907	0.019	0.00011	status=JK
YDR125C	ECM18		1.01502	0.009	1.04844	0.012	-0.03249	0.009	3e-05	status=JK
YDR126W	SWF1		0.85251	0.053	0.75409	0.073	0.10657	0.053	7e-05
YDR127W	ARO1		0.71605	0.048	0.38062	0.006	0.33856	0.048	8e-05
YDR128W	MTC5		0.93684	0.033	1.03602	0.076	-0.10772	0.033	1e-05
YDR130C	FIN1		1.01951	0.006	0.99452	0.015	0.02726	0.006	1e-05	status=JK
YDR131C	YDR131C		0.97156	0.047	1.02424	0.192	-0.10444	0.047	3e-05
YDR132C	YDR132C		1.02975	0.046	0.94886	0.072	0.06982	0.046	3e-05
YDR133C	YDR133C		1.06152	0.068	1.07231	0.096	0.00147	0.068	7e-05
YDR134C	YDR134C		1.07298	0.032	1.07672	0.011	0.0024	0.032	1e-05
YDR135C	YCF1		0.98207	0.018	1.0583	0.008	-0.07938	0.018	0
YDR139C	RUB1		0.98108	0.022	1.05145	0.014	-0.06998	0.022	0
YDR142C	PEX7		0.98815	0.036	1.06074	0.007	-0.07543	0.036	1e-05
YDR143C	SAN1		1.16065	0.005	1.21139	0.081	-0.04111	0.005	1e-05	status=JK
YDR144C	MKC7		0.81815	0.028	0.80271	0.08	0.00631	0.028	1e-05
YDR146C	SWI5		0.94372	0.018	0.94458	0.084	0.01952	0.018	0.00012	status=JK
YDR147W	EKI1		0.99375	0.022	0.92109	0.101	0.06032	0.022	0
YDR148C	KGD2		0.95341	0.023	1.0406	0.019	-0.09482	0.023	0
YDR149C	YDR149C		0.91549	0.039	0.96124	0.081	-0.04061	0.039	2e-05
YDR150W	NUM1		0.90584	0.07	0.91929	0.054	-0.01091	0.07	0.00013
YDR151C	CTH1		1.09055	0.054	1.06689	0.08	0.01588	0.054	3e-05
YDR152W	GIR2		1.01656	0.015	1.04993	0.055	-0.02782	0.015	8e-05	status=JK
YDR153C	ENT5		1.07601	0.024	1.00992	0.076	0.06988	0.024	0
YDR154C	YDR154C		0.97753	0.064	0.91538	0.16	0.02872	0.064	8e-05
YDR155C	CPR1		1.02305	0.12	0.96889	0.243	-0.00031	0.12	0.00044
YDR156W	RPA14		0.93284	0.004	0.88358	0.129	0.06678	0.004	1e-05	status=JK
YDR157W	YDR157W		1.00904	0.062	1.13278	0.014	-0.12292	0.062	6e-05
YDR158W	HOM2		0.88101	0.009	0.74961	0.063	0.15033	0.009	4e-05	status=JK
YDR159W	SAC3		0.7378	0.028	0.35672	0.033	0.3887	0.028	1e-05
YDR161W	YDR161W		0.98858	0.029	1.0134	0.104	-0.03209	0.029	1e-05
YDR162C	NBP2		0.79383	0.036	0.93151	0.146	-0.15729	0.036	3e-05
YDR163W	CWC15		1.01252	0.062	1.03054	0.14	-0.00824	0.062	6e-05
YDR165W	TRM82		0.98398	0.064	1.04129	0.1	-0.05442	0.063	7e-05
YDR169C	STB3		0.99513	0.048	1.04769	0.1	-0.04547	0.047	3e-05
YDR171W	HSP42		0.99797	0.054	0.84532	0.087	0.1409	0.054	4e-05
YDR173C	ARG82		0.32586	0.056	0.14911	0.006	0.17926	0.056	0.00136
YDR174W	HMO1		0.49337	0.031	0.4151	0.046	0.07991	0.031	7e-05
YDR178W	SDH4		0.90606	0.081	1.0731	0.19	-0.10472	0.081	0.00019
YDR179C	CSN9		1.04209	0.054	1.00151	0.215	0.04655	0.054	4e-05
YDR179W-A	YDR179W-A		0.9377	0.085	0.95033	0.16	-0.0439	0.085	0.0002
YDR181C	SAS4		0.97454	0.057	0.96117	0.223	-0.01295	0.057	5e-05
YDR183W	PLP1		0.94256	0.041	0.95028	0.055	-0.01723	0.041	2e-05
YDR184C	ATC1		0.96063	0.056	0.97377	0.027	-0.02081	0.056	5e-05
YDR185C	UPS3		0.9919	0.006	0.97285	0.006	0.02022	0.006	1e-05	status=JK
YDR186C	YDR186C		1.02065	0.013	0.99103	0.025	0.02279	0.013	5e-05	status=JK
YDR191W	HST4		1.06802	0.034	0.99726	0.104	0.08365	0.034	1e-05
YDR192C	NUP42		1.05302	0.026	1.07382	0.028	-0.01937	0.026	0
YDR193W	YDR193W		1.05276	0.028	1.0271	0.039	0.04785	0.028	1e-05
YDR198C	RKM2		1.1091	0.053	1.10204	0.046	0.00441	0.053	3e-05
YDR199W	YDR199W		1.09864	0.037	1.19499	0.011	-0.10224	0.037	1e-05
YDR202C	RAV2		0.8987	0.04	0.92363	0.171	-0.05421	0.04	2e-05
YDR203W	YDR203W		0.978	0.004	0.99732	0.099	-0.01559	0.004	0	status=JK
YDR205W	MSC2		1.00367	0.01	0.97375	0.05	0.04406	0.01	0
YDR206W	EBS1		0.99434	0.037	0.98354	0.036	0.00336	0.037	1e-05
YDR207C	UME6		0.54632	0.005	0.29527	0.019	0.24611	0.005	3e-05	status=JK
YDR209C	YDR209C		1.02063	0.032	1.06719	0.019	-0.04644	0.032	1e-05
YDR210W	YDR210W		1.05277	0.028	0.98835	0.015	0.06131	0.028	1e-05
YDR213W	UPC2		0.99516	0.023	0.998	0.005	-0.00505	0.023	0
YDR214W	AHA1		1.00159	0.014	1.05429	0.083	-0.03665	0.014	7e-05	status=JK
YDR215C	YDR215C		1.02817	0.026	1.00264	0.024	0.02983	0.026	0
YDR216W	ADR1		1.01049	0.007	1.04137	0.009	-0.03446	0.007	0
YDR217C	RAD9		0.99358	0.006	0.94992	0.013	0.03848	0.006	1e-05	status=JK
YDR218C	SPR28		0.99744	0.07	0.96679	0.133	0.0193	0.07	9e-05
YDR219C	MFB1		0.90271	0.034	0.88257	0.065	0.01244	0.034	2e-05
YDR220C	YDR220C		0.99548	0.04	0.98876	0.011	0.00588	0.04	2e-05
YDR221W	GTB1		1.05272	0.005	1.04374	0.017	0.012	0.005	1e-05	status=JK
YDR222W	YDR222W		1.0381	0.014	1.01089	0.064	0.0115	0.014	0
YDR223W	CRF1		1.0052	0.073	0.96877	0.017	0.04519	0.073	0.00011
YDR225W	HTA1		1.02034	0.086	1.09269	0.13	-0.06453	0.086	0.00017
YDR227W	SIR4		0	0	0	0	0	0	#NUM!
YDR229W	IVY1		1.00424	0.03	1.01594	0.035	-0.00618	0.03	1e-05
YDR233C	RTN1		0.94576	0.035	0.96005	0.038	-0.01681	0.035	1e-05
YDR234W	LYS4		0.18463	0.003	0.16248	0.017	0.01271	0.003	9e-05	status=JK
YDR239C	YDR239C		1.09596	0.084	1.02782	0.086	0.08014	0.084	0.00012
YDR241W	YDR241W		0.85119	0.068	0.75956	0.117	0.09672	0.068	0.00014
YDR242W	AMD2		1.1039	0.051	1.08789	0.089	0.02192	0.051	3e-05
YDR244W	PEX5		0.9748	0.018	1.0512	0.036	-0.0845	0.018	0
YDR245W	MNN10		0.69792	0.017	0.59027	0.007	0.1112	0.017	0
YDR247W	VHS1		1.01556	0.033	0.9772	0.075	0.03844	0.033	1e-05
YDR248C	YDR248C		1.0223	0.029	0.99311	0.032	0.03667	0.029	1e-05
YDR249C	YDR249C		1.08349	0.074	0.95275	0.281	0.05654	0.074	9e-05
YDR250C	YDR250C		0.99479	0.006	1.04074	0.069	-0.02595	0.006	1e-05	status=JK
YDR251W	PAM1		1.00987	0.007	0.99687	0.074	0.00165	0.007	1e-05	status=JK
YDR252W	BTT1		1.0216	0.026	1.01463	0.03	0.0105	0.026	0
YDR253C	MET32		0.9782	0.034	1.03621	0.055	-0.0667	0.034	1e-05
YDR254W	CHL4		1.0229	0.019	1.03124	0.021	-0.00028	0.019	0.00011	status=JK
YDR255C	RMD5		1.07975	0.026	1.11201	0.082	-0.01345	0.026	0
YDR256C	CTA1		1.0323	0.031	1.10723	0.012	-0.08052	0.031	1e-05
YDR257C	RKM4		1.04398	0.047	0.92314	0.031	0.12616	0.047	3e-05
YDR258C	HSP78		0.95444	0.053	0.95123	0.058	0.01966	0.053	5e-05
YDR259C	YAP6		1.08667	0.084	0.95729	0.148	0.14841	0.084	0.002	status=JK
YDR260C	SWM1		1.01558	0.076	0.99859	0.039	0.01564	0.076	0.00011
YDR261C	EXG2		1.03604	0.004	1.03787	0.067	-0.00511	0.004	0
YDR262W	YDR262W		1.01346	0.032	1.05916	0.01	-0.04612	0.031	1e-05
YDR263C	DIN7		0.97286	0.021	1.05305	0.101	-0.0889	0.021	0
YDR265W	PEX10		0.95578	0.002	0.99908	0.127	-0.06574	0.002	0	status=JK
YDR266C	HEL2		0.99633	0.026	0.98692	0.063	0.00732	0.026	1e-05
YDR269C	YDR269C		0.98966	0.017	1.01329	0.068	-0.03174	0.017	0
YDR270W	CCC2		1.03435	0.014	1.04364	0.016	-0.00046	0.014	6e-05	status=JK
YDR271C	YDR271C		1.04013	0.059	1.06301	0.028	-0.02188	0.059	5e-05
YDR272W	GLO2		0.99616	0.047	1.06694	0.024	-0.06582	0.047	3e-05
YDR273W	DON1		1.01129	0.048	1.03767	0.012	-0.02025	0.048	3e-05
YDR274C	YDR274C		1.09029	0.055	1.1018	0.111	0.01307	0.055	4e-05
YDR275W	BSC2		1.06137	0.027	1.03174	0.061	0.03152	0.027	0.00021	status=JK
YDR276C	PMP3		0.94839	0.026	0.95404	0.027	-0.00838	0.026	1e-05
YDR277C	MTH1		0.99629	0.012	1.01048	0.017	-0.014	0.012	5e-05	status=JK
YDR278C	YDR278C		0.94301	0.127	1.0107	0.068	-0.06054	0.127	0.00067
YDR279W	RNH202		0.99877	0.013	1.0201	0.025	-0.02308	0.013	5e-05	status=JK
YDR281C	PHM6		1.00141	0.04	0.99381	0.148	0.01889	0.04	2e-05
YDR282C	YDR282C		1.00669	0.048	1.05453	0.065	-0.0398	0.048	3e-05
YDR284C	DPP1		1.01904	0.043	1.02956	0.077	-0.01914	0.043	2e-05
YDR285W	ZIP1		1.0407	0.062	1.01454	0.114	0.01795	0.062	6e-05
YDR286C	YDR286C		0.98494	0.018	1.02019	0.058	-0.02765	0.018	0
YDR287W	INM2		1.01763	0.044	1.10169	0.072	-0.09989	0.044	2e-05
YDR289C	RTT103		0.81827	0.022	0.78717	0.172	-0.01268	0.022	0.00024	status=JK
YDR290W	YDR290W		0.90654	0.016	0.91971	0.064	-0.02277	0.016	0
YDR291W	HRQ1		1.03129	0.03	0.68359	0.049	0.32609	0.03	0.00028	status=JK
YDR293C	SSD1		0.80011	0.112	0.68279	0.15	0.12857	0.112	0.00074
YDR294C	DPL1		0.98482	0.023	0.94013	0.196	0.09374	0.023	0
YDR297W	SUR2		0.98438	0.045	0.94043	0.182	0.02463	0.045	3e-05
YDR304C	CPR5		0.97638	0.016	1.14468	0.043	-0.19242	0.016	9e-05	status=JK
YDR305C	HNT2		1.04846	0.011	1.0981	0.056	-0.04921	0.011	4e-05	status=JK
YDR306C	YDR306C		0.97695	0.004	0.98655	0.096	-0.02398	0.004	0
YDR307W	PMT7		0.96896	0.027	0.93002	0.077	0.02411	0.027	1e-05
YDR309C	GIC2		0.96747	0.012	1.00215	0.011	-0.0405	0.012	0
YDR310C	SUM1		0.93433	0.04	0.96853	0.12	-0.00979	0.04	2e-05
YDR312W	SSF2		1.03141	0.031	0.98778	0.043	0.04912	0.031	1e-05
YDR313C	PIB1		1.03928	0.028	0.908	0.048	0.12268	0.028	1e-05
YDR314C	RAD34		1.06249	0.036	1.07621	0.065	-0.01374	0.036	1e-05
YDR315C	IPK1		0.792	0.063	0.86625	0.003	-0.07475	0.063	0.00014
YDR316W	OMS1		0.86396	0.019	0.94613	0.111	-0.08814	0.019	0
YDR317W	HIM1		1.04269	0.013	1.06781	0.045	-0.02171	0.013	5e-05	status=JK
YDR318W	MCM21		1.00561	0.049	1.04797	0.057	-0.01647	0.049	3e-05
YDR319C	YFT2		1.02501	0.041	1.04273	0.032	-0.01777	0.041	2e-05
YDR320C	SWA2		0.85751	0.027	0.85265	0.005	0.00296	0.027	1e-05
YDR321W	ASP1		1.00308	0.008	1.05775	0.113	-0.02451	0.008	2e-05	status=JK
YDR326C	YSP2		1.05762	0.039	0.8974	0.162	0.14404	0.039	1e-05
YDR329C	PEX3		0.99326	0.025	1.02937	0.072	-0.02796	0.025	0
YDR330W	UBX5		1.03754	0.014	0.98353	0.053	0.04891	0.014	0
YDR332W	IRC3		1.02417	0.016	0.97981	0.079	0.06272	0.016	0
YDR333C	YDR333C		0.96503	0.042	0.96552	0.091	-0.00102	0.042	2e-05
YDR334W	SWR1		0.89044	0.053	0.91996	0.032	-0.03894	0.053	6e-05
YDR335W	MSN5		1.04039	0.057	1.0756	0.043	-0.04414	0.057	5e-05
YDR336W	YDR336W		0.85027	0.088	0.84248	0.065	0.02219	0.088	0.0003
YDR338C	YDR338C		1.01331	0.027	0.94719	0.109	0.06678	0.027	1e-05
YDR340W	YDR340W		1.00878	0.019	1.0228	0.057	-0.01147	0.019	0
YDR344C	YDR344C		1.0234	0.03	0.95121	0.016	0.07235	0.03	1e-05
YDR345C	HXT3		1.0519	0.017	1.07581	0.039	-0.02501	0.017	0
YDR346C	SVF1		1.03483	0.01	1.06301	0.059	-0.0123	0.01	3e-05	status=JK
YDR348C	PAL1		0.98057	0.064	1.00532	0.084	-0.01409	0.064	8e-05
YDR349C	YPS7		0.94559	0.026	1.03697	0.024	-0.09995	0.026	1e-05
YDR351W	SBE2		1.03812	0.02	1.02274	0.05	0.02647	0.02	0
YDR352W	YPQ2		1.0329	0.017	0.99376	0.068	0.05431	0.017	9e-05	status=JK
YDR354W	TRP4		1.00534	0.035	1.0212	0.081	-0.0186	0.035	1e-05
YDR357C	CNL1		1.00776	0.006	0.9921	0.162	0.00122	0.006	1e-05	status=JK
YDR358W	GGA1		1.03581	0.016	0.98491	0.085	0.04933	0.016	8e-05	status=JK
YDR359C	EAF1		0.64204	0.153	0.32543	0.116	0.30979	0.153	0.00357
YDR360W	YDR360W		0.93044	0.031	0.93553	0.054	-0.00372	0.031	1e-05
YDR363W	ESC2		0.95868	0.021	0.92456	0.017	0.0381	0.021	0
YDR363W-A	SEM1		1.02134	0.027	0.97072	0.24	-0.00955	0.027	0.00022	status=JK
YDR368W	YPR1		1.0035	0.017	1.06457	0.029	-0.063	0.017	0
YDR369C	XRS2		0.97145	0.071	0.96822	0.01	-0.00121	0.071	0.00011
YDR370C	YDR370C		1.00377	0.042	1.06381	0.108	-0.08989	0.042	2e-05
YDR371W	CTS2		1.07854	0.051	1.04652	0.057	0.03704	0.051	3e-05
YDR372C	VPS74		0.93303	0.06	0.84616	0.018	0.0905	0.06	7e-05
YDR374C	YDR374C		1.00869	0.059	1.04241	0.053	-0.01992	0.059	6e-05
YDR375C	BCS1		0.6124	0.019	0.75161	0.064	-0.15432	0.019	1e-05
YDR378C	LSM6		0.67297	0.046	0.6874	0.013	-0.01312	0.046	9e-05
YDR379W	RGA2		1.04505	0.023	1.10135	0.007	-0.05464	0.023	0
YDR380W	ARO10		1.00424	0.025	0.9654	0.051	0.03814	0.025	0
YDR382W	RPP2B		1.02294	0.073	1.07719	0.008	-0.05711	0.073	0.0001
YDR383C	NKP1		0.94607	0.046	0.98127	0.008	-0.03202	0.046	3e-05
YDR384C	ATO3		0.97403	0.049	1.08708	0.022	-0.10868	0.049	4e-05
YDR385W	EFT2		0.87881	0.044	0.91097	0.014	-0.03904	0.044	4e-05
YDR386W	MUS81		0.98926	0.033	0.89321	0.068	0.10632	0.033	1e-05
YDR387C	YDR387C		1.01259	0.001	1.02564	0.06	0.006	0.001	0	status=JK
YDR388W	RVS167		0.6464	0.016	0.86053	0.056	-0.21174	0.016	0
YDR389W	SAC7		0.88078	0.048	1.0792	0.038	-0.20247	0.048	5e-05
YDR391C	YDR391C		1.03708	0.012	1.09256	0.038	-0.06302	0.012	0
YDR392W	SPT3		0.73932	0.01	0.75195	0.046	-0.01543	0.01	6e-05	status=JK
YDR393W	SHE9		0.77563	0.015	0.7702	0.061	0.02315	0.015	0.00012	status=JK
YDR395W	SXM1		0.96749	0.03	0.83094	0.096	0.13729	0.03	1e-05
YDR399W	HPT1		0.9973	0.03	1.03103	0.157	0.01069	0.03	0.0003	status=JK
YDR400W	URH1		1.00602	0.035	1.08672	0.078	-0.06136	0.035	1e-05
YDR401W	YDR401W		1.02992	0.003	1.09925	0.137	-0.0552	0.003	0	status=JK
YDR402C	DIT2		1.02444	0.032	0.97758	0.054	0.03408	0.032	1e-05
YDR403W	DIT1		0.98382	0.009	0.92504	0.094	0.03689	0.009	0
YDR406W	PDR15		1.03407	0.024	1.06304	0.075	-0.03488	0.024	0
YDR408C	ADE8		1.00104	0.044	0.98498	0.103	0.00349	0.044	2e-05
YDR409W	SIZ1		1.04231	0.003	1.14954	0.087	-0.11816	0.003	0	status=JK
YDR410C	STE14		0	0	0	0	0	0	#NUM!
YDR411C	DFM1		1.02316	0.042	1.05003	0.057	-0.02503	0.042	2e-05
YDR414C	ERD1		0.89216	0.05	0.84013	0.097	0.06324	0.049	5e-05
YDR415C	YDR415C		0.97762	0.12	1.00885	0.184	-0.03226	0.12	0.0005
YDR419W	RAD30		1.05256	0.084	0.93443	0.194	0.09959	0.084	0.00014
YDR420W	HKR1		1.07425	0.031	0.96853	0.129	0.08064	0.031	0.00029	status=JK
YDR421W	ARO80		1.00072	0.034	0.95028	0.048	0.07367	0.034	1e-05
YDR422C	SIP1		1.00647	0.045	1.09266	0.029	-0.07851	0.045	2e-05
YDR423C	CAD1		1.05672	0.053	1.04276	0.029	0.01839	0.053	3e-05
YDR424C	DYN2		0.95012	0.055	0.91428	0.133	0.01917	0.055	5e-05
YDR425W	SNX41		0.86985	0.127	0.93322	0.068	-0.06756	0.127	0.00083
YDR426C	YDR426C		0.91396	0.056	0.9949	0.037	-0.06996	0.056	6e-05
YDR428C	BNA7		1.02156	0.025	0.97342	0.029	0.04384	0.025	0
YDR430C	CYM1		1.03742	0.051	1.02476	0.013	0.01021	0.051	3e-05
YDR431W	YDR431W		0.95006	0.095	0.99781	0.074	-0.03665	0.095	0.00027
YDR435C	PPM1		0.90884	0.011	0.95856	0.047	-0.05601	0.011	5e-05	status=JK
YDR436W	PPZ2		1.12537	0.069	1.14501	0.045	-0.02118	0.069	6e-05
YDR438W	THI74		0.98203	0.046	0.99798	0.009	-0.01615	0.046	3e-05
YDR439W	LRS4		1.06106	0.045	1.07045	0.038	-0.0084	0.045	2e-05
YDR440W	DOT1		0.9902	0.03	0.98687	0.038	-4e-05	0.03	1e-05
YDR441C	APT2		0.9904	0.021	0.99406	0.051	0.00199	0.021	0
YDR444W	YDR444W		1.0213	0.007	1.09758	0.022	-0.08282	0.007	0
YDR445C	YDR445C		1.00512	0.016	1.07219	0.058	-0.05293	0.016	8e-05	status=JK
YDR446W	ECM11		0.97026	0.016	1.02441	0.016	-0.05086	0.016	0
YDR447C	RPS17B		0.99303	0.007	0.96045	0.044	0.02966	0.007	2e-05	status=JK
YDR451C	YHP1		0.99997	0.009	1.03715	0.054	-0.03995	0.009	3e-05	status=JK
YDR452W	PPN1		1.04859	0.032	1.09289	0.116	-0.04837	0.032	0.0003	status=JK
YDR453C	TSA2		1.01555	0.068	0.99407	0.101	0.0096	0.068	8e-05
YDR455C	YDR455C		0.69228	0.105	0.80143	0.024	-0.10455	0.105	0.00094
YDR458C	HEH2		0.98659	0.058	0.98318	0.101	-0.01348	0.058	6e-05
YDR459C	PFA5		1.0224	0.048	0.95235	0.04	0.07874	0.048	3e-05
YDR461W	MFA1		0.9626	0.01	0.92025	0.132	0.03625	0.01	3e-05	status=JK
YDR463W	STP1		0.8533	0.084	0.7524	0.013	0.10316	0.084	0.00026
YDR465C	RMT2		1.05573	0.073	1.06251	0.049	-0.01327	0.073	9e-05
YDR466W	PKH3		1.08106	0.016	1.06675	0.017	0.00555	0.016	0
YDR467C	YDR467C		1.08275	0.003	1.01354	0.01	0.06884	0.003	0	status=JK
YDR469W	SDC1		0.90668	0.073	0.96675	0.004	-0.06006	0.073	0.00014
YDR471W	RPL27B		0.93903	0.03	0.97089	0.063	-0.02069	0.03	1e-05
YDR474C	YDR474C		1.09432	0.014	1.09666	0.067	0.01281	0.014	5e-05	status=JK
YDR475C	JIP4		1.03351	0.051	1.10149	0.018	-0.06908	0.051	3e-05
YDR476C	YDR476C		0.98216	0.081	0.9903	0.009	-0.00844	0.081	0.00016
YDR477W	SNF1		0.66326	0.03	0.58991	0.165	0.03574	0.03	3e-05
YDR479C	PEX29		0.97849	0.048	0.93161	0.041	0.0471	0.048	3e-05
YDR480W	DIG2		0.99209	0.004	0.99044	0.059	0.00994	0.004	0	status=JK
YDR481C	PHO8		1.06381	0.004	1.0755	0.09	-0.01064	0.004	0	status=JK
YDR482C	CWC21		0.99371	0.063	0.98289	0.077	-0.001	0.063	7e-05
YDR483W	KRE2		1.02635	0.007	1.01072	0.021	0.01662	0.007	2e-05	status=JK
YDR483W	KRE2		1.10479	0.042	1.09895	0.158	-0.00346	0.042	2e-05
YDR485C	VPS72		1.03524	0.055	0.99311	0.009	0.04496	0.055	4e-05
YDR486C	VPS60		0.93978	0.019	0.93353	0.013	0.0014	0.019	0.00013	status=JK
YDR488C	PAC11		1.00924	0.01	0.9621	0.131	0.0249	0.01	3e-05	status=JK
YDR490C	PKH1		1.10928	0.036	1.07222	0.05	0.03675	0.036	0.00035	status=JK
YDR491C	YDR491C		0.98098	0.018	0.98652	0.017	0.00397	0.018	0.00011	status=JK
YDR492W	IZH1		1.05936	0.054	1.01155	0.039	0.05166	0.054	4e-05
YDR493W	MZM1		0.98793	0.011	0.87406	0.173	0.08135	0.011	4e-05	status=JK
YDR494W	RSM28		1.03806	0.052	1.0202	0.014	0.01937	0.052	3e-05
YDR496C	PUF6		0.8215	0.028	0.87205	0.005	-0.04867	0.028	1e-05
YDR497C	ITR1		1.04474	0.01	1.04984	0.117	-0.01976	0.01	3e-05	status=JK
YDR500C	RPL37B		0	0	0	0	0	0	#NUM!
YDR501W	PLM2		1.08824	0.037	1.06233	0.015	0.02232	0.037	1e-05
YDR502C	SAM2		1.00149	0.048	0.95437	0.186	0.0154	0.048	3e-05
YDR503C	LPP1		1.02132	0.027	0.98916	0.025	0.03539	0.027	1e-05
YDR504C	SPG3		1.00266	0.075	0.98523	0.067	0.02783	0.075	0.00012
YDR505C	PSP1		0.89111	0.115	0.91285	0.064	-0.03704	0.114	0.00058
YDR506C	GMC1		1.03784	0.04	1.01947	0.041	0.01525	0.04	0.0005	status=JK
YDR508C	GNP1		0.9995	0.028	1.01423	0.056	-0.00581	0.028	1e-05
YDR509W	YDR509W		0.87871	0.046	0.84734	0.063	0.04748	0.046	4e-05
YDR511W	ACN9		1.02688	0.026	1.0899	0.076	-0.06609	0.026	0
YDR512C	EMI1		0.58853	0.087	0.53623	0.039	0.05166	0.087	0.00089
YDR513W	GRX2		0.98566	0.033	0.99693	0.042	-0.00541	0.033	1e-05
YDR514C	YDR514C		0.97156	0.149	0.88958	0.062	0.09263	0.149	0.00775	status=JK
YDR515W	SLF1		0.99746	0.071	1.01619	0.044	-0.01133	0.071	0.0001
YDR516C	EMI2		1.08255	0.036	1.11131	0.091	-0.05593	0.036	1e-05
YDR517W	GRH1		1.03564	0.052	1.02409	0.055	0.02684	0.052	3e-05
YDR519W	FPR2		0.97087	0.018	0.97812	0.063	-0.00627	0.018	0
YDR520C	URC2		1.03419	0.042	0.99268	0.034	0.04608	0.042	2e-05
YDR522C	SPS2		0.94709	0.114	1.04698	0.023	-0.09615	0.114	0.00047
YDR524C	AGE1		0.95995	0.08	0.97546	0.157	-0.01969	0.08	0.00016
YDR525W	YDR525W		1.03251	0.033	1.05914	0.091	-0.02573	0.033	1e-05
YDR525W-A	SNA2		1.08969	0.109	1.04924	0.136	0.03171	0.108	0.00027
YDR528W	HLR1		1.0237	0.077	0.98443	0.029	0.04774	0.077	0.00011
YDR530C	APA2		1.06448	0.014	0.97449	0.04	0.08759	0.014	6e-05	status=JK
YDR532C	KRE28		0.17832	0.044	0.18937	0.027	-0.01588	0.044	0.00383
YDR533C	HSP31		1.06581	0.007	1.00718	0.004	0.05771	0.007	2e-05	status=JK
YDR534C	FIT1		1.04558	0.027	1.01329	0.07	0.04349	0.027	0.00022	status=JK
YDR535C	YDR535C		1.02399	0.021	1.02365	0.096	-0.02574	0.021	0.00014	status=JK
YDR536W	STL1		1.01169	0.12	1.02513	0.059	-0.02297	0.12	0.00045
YDR537C	YDR537C		0.89458	0.122	0.91667	0.037	-0.01799	0.122	0.00069
YDR538W	PAD1		0.95558	0.064	0.9174	0.129	0.05363	0.064	0.00148	status=JK
YDR539W	FDC1		0.90386	0.116	0.87058	0.145	0.02745	0.116	0.00058
YDR540C	IRC4		0.97482	0.091	1.06722	0.104	-0.06096	0.091	0.00022
YDR541C	YDR541C		1.13263	0.031	1.11769	0.081	-0.00936	0.031	0.00026	status=JK
YEL001C	IRC22		#NUM!	#NUM!	#NUM!	#NUM!	#NUM!	#NUM!	#NUM!	status=LK
YEL003W	GIM4		#NUM!	#NUM!	#NUM!	#NUM!	#NUM!	#NUM!	#NUM!	status=LK
YEL004W	YEA4		#NUM!	#NUM!	#NUM!	#NUM!	#NUM!	#NUM!	#NUM!	status=LK
YEL005C	VAB2		#NUM!	#NUM!	#NUM!	#NUM!	#NUM!	#NUM!	#NUM!	status=LK
YEL006W	YEA6		#NUM!	#NUM!	#NUM!	#NUM!	#NUM!	#NUM!	#NUM!	status=LK
YEL007W	MIT1		#NUM!	#NUM!	#NUM!	#NUM!	#NUM!	#NUM!	#NUM!	status=LK
YEL008W	YEL008W		#NUM!	#NUM!	#NUM!	#NUM!	#NUM!	#NUM!	#NUM!	status=LK
YEL010W	YEL010W		#NUM!	#NUM!	#NUM!	#NUM!	#NUM!	#NUM!	#NUM!	status=LK
YEL011W	GLC3		#NUM!	#NUM!	#NUM!	#NUM!	#NUM!	#NUM!	#NUM!	status=LK
YEL012W	UBC8		#NUM!	#NUM!	#NUM!	#NUM!	#NUM!	#NUM!	#NUM!	status=LK
YEL013W	VAC8		#NUM!	#NUM!	#NUM!	#NUM!	#NUM!	#NUM!	#NUM!	status=LK
YEL014C	YEL014C		#NUM!	#NUM!	#NUM!	#NUM!	#NUM!	#NUM!	#NUM!	status=LK
YEL015W	EDC3		#NUM!	#NUM!	#NUM!	#NUM!	#NUM!	#NUM!	#NUM!	status=LK
YEL016C	NPP2		#NUM!	#NUM!	#NUM!	#NUM!	#NUM!	#NUM!	#NUM!	status=LK
YEL017C-A	PMP2		#NUM!	#NUM!	#NUM!	#NUM!	#NUM!	#NUM!	#NUM!	status=LK
YEL017W	GTT3		#NUM!	#NUM!	#NUM!	#NUM!	#NUM!	#NUM!	#NUM!	status=LK
YEL020C	YEL020C		#NUM!	#NUM!	#NUM!	#NUM!	#NUM!	#NUM!	#NUM!	status=LK
YEL023C	YEL023C		#NUM!	#NUM!	#NUM!	#NUM!	#NUM!	#NUM!	#NUM!	status=LK
YEL025C	YEL025C		#NUM!	#NUM!	#NUM!	#NUM!	#NUM!	#NUM!	#NUM!	status=LK
YEL028W	YEL028W		#NUM!	#NUM!	#NUM!	#NUM!	#NUM!	#NUM!	#NUM!	status=LK
YEL030W	ECM10		#NUM!	#NUM!	#NUM!	#NUM!	#NUM!	#NUM!	#NUM!	status=LK
YEL031W	SPF1		#NUM!	#NUM!	#NUM!	#NUM!	#NUM!	#NUM!	#NUM!	status=LK
YEL033W	MTC7		#NUM!	#NUM!	#NUM!	#NUM!	#NUM!	#NUM!	#NUM!	status=LK
YEL037C	RAD23		#NUM!	#NUM!	#NUM!	#NUM!	#NUM!	#NUM!	#NUM!	status=LK
YEL038W	UTR4		#NUM!	#NUM!	#NUM!	#NUM!	#NUM!	#NUM!	#NUM!	status=LK
YEL039C	CYC7		#NUM!	#NUM!	#NUM!	#NUM!	#NUM!	#NUM!	#NUM!	status=LK
YEL040W	UTR2		#NUM!	#NUM!	#NUM!	#NUM!	#NUM!	#NUM!	#NUM!	status=LK
YEL041W	YEF1		#NUM!	#NUM!	#NUM!	#NUM!	#NUM!	#NUM!	#NUM!	status=LK
YEL042W	GDA1		#NUM!	#NUM!	#NUM!	#NUM!	#NUM!	#NUM!	#NUM!	status=LK
YEL043W	YEL043W		#NUM!	#NUM!	#NUM!	#NUM!	#NUM!	#NUM!	#NUM!	status=LK
YEL047C	FRD1		#NUM!	#NUM!	#NUM!	#NUM!	#NUM!	#NUM!	#NUM!	status=LK
YEL048C	TCA17		#NUM!	#NUM!	#NUM!	#NUM!	#NUM!	#NUM!	#NUM!	status=LK
YEL049W	PAU2		#NUM!	#NUM!	#NUM!	#NUM!	#NUM!	#NUM!	#NUM!	status=LK
YEL052W	AFG1		#NUM!	#NUM!	#NUM!	#NUM!	#NUM!	#NUM!	#NUM!	status=LK
YEL053C	MAK10		#NUM!	#NUM!	#NUM!	#NUM!	#NUM!	#NUM!	#NUM!	status=LK
YEL056W	HAT2		#NUM!	#NUM!	#NUM!	#NUM!	#NUM!	#NUM!	#NUM!	status=LK
YEL057C	YEL057C		#NUM!	#NUM!	#NUM!	#NUM!	#NUM!	#NUM!	#NUM!	status=LK
YEL059W	YEL059W		#NUM!	#NUM!	#NUM!	#NUM!	#NUM!	#NUM!	#NUM!	status=LK
YEL060C	PRB1		#NUM!	#NUM!	#NUM!	#NUM!	#NUM!	#NUM!	#NUM!	status=LK
YEL061C	CIN8		#NUM!	#NUM!	#NUM!	#NUM!	#NUM!	#NUM!	#NUM!	status=LK
YEL062W	NPR2		#NUM!	#NUM!	#NUM!	#NUM!	#NUM!	#NUM!	#NUM!	status=LK
YEL063C	CAN1		#NUM!	#NUM!	#NUM!	#NUM!	#NUM!	#NUM!	#NUM!	status=LK
YEL064C	AVT2		#NUM!	#NUM!	#NUM!	#NUM!	#NUM!	#NUM!	#NUM!	status=LK
YEL065W	SIT1		#NUM!	#NUM!	#NUM!	#NUM!	#NUM!	#NUM!	#NUM!	status=LK
YEL066W	HPA3		#NUM!	#NUM!	#NUM!	#NUM!	#NUM!	#NUM!	#NUM!	status=LK
YEL067C	YEL067C		#NUM!	#NUM!	#NUM!	#NUM!	#NUM!	#NUM!	#NUM!	status=LK
YEL068C	YEL068C		#NUM!	#NUM!	#NUM!	#NUM!	#NUM!	#NUM!	#NUM!	status=LK
YEL071W	DLD3		#NUM!	#NUM!	#NUM!	#NUM!	#NUM!	#NUM!	#NUM!	status=LK
YER001W	MNN1		#NUM!	#NUM!	#NUM!	#NUM!	#NUM!	#NUM!	#NUM!	status=LK
YER002W	NOP16		#NUM!	#NUM!	#NUM!	#NUM!	#NUM!	#NUM!	#NUM!	status=LK
YER004W	FMP52		#NUM!	#NUM!	#NUM!	#NUM!	#NUM!	#NUM!	#NUM!	status=LK
YER005W	YND1		#NUM!	#NUM!	#NUM!	#NUM!	#NUM!	#NUM!	#NUM!	status=LK
YER007C-A	TMA20		#NUM!	#NUM!	#NUM!	#NUM!	#NUM!	#NUM!	#NUM!	status=LK
YER007W	PAC2		#NUM!	#NUM!	#NUM!	#NUM!	#NUM!	#NUM!	#NUM!	status=LK
YER010C	YER010C		#NUM!	#NUM!	#NUM!	#NUM!	#NUM!	#NUM!	#NUM!	status=LK
YER011W	TIR1		#NUM!	#NUM!	#NUM!	#NUM!	#NUM!	#NUM!	#NUM!	status=LK
YER016W	BIM1		#NUM!	#NUM!	#NUM!	#NUM!	#NUM!	#NUM!	#NUM!	status=LK
YER019C-A	SBH2		#NUM!	#NUM!	#NUM!	#NUM!	#NUM!	#NUM!	#NUM!	status=LK
YER019W	ISC1		#NUM!	#NUM!	#NUM!	#NUM!	#NUM!	#NUM!	#NUM!	status=LK
YER020W	GPA2		#NUM!	#NUM!	#NUM!	#NUM!	#NUM!	#NUM!	#NUM!	status=LK
YER024W	YAT2		#NUM!	#NUM!	#NUM!	#NUM!	#NUM!	#NUM!	#NUM!	status=LK
YER027C	GAL83		#NUM!	#NUM!	#NUM!	#NUM!	#NUM!	#NUM!	#NUM!	status=LK
YER028C	MIG3		#NUM!	#NUM!	#NUM!	#NUM!	#NUM!	#NUM!	#NUM!	status=LK
YER030W	CHZ1		#NUM!	#NUM!	#NUM!	#NUM!	#NUM!	#NUM!	#NUM!	status=LK
YER031C	YPT31		#NUM!	#NUM!	#NUM!	#NUM!	#NUM!	#NUM!	#NUM!	status=LK
YER032W	FIR1		#NUM!	#NUM!	#NUM!	#NUM!	#NUM!	#NUM!	#NUM!	status=LK
YER033C	ZRG8		#NUM!	#NUM!	#NUM!	#NUM!	#NUM!	#NUM!	#NUM!	status=LK
YER034W	YER034W		#NUM!	#NUM!	#NUM!	#NUM!	#NUM!	#NUM!	#NUM!	status=LK
YER035W	EDC2		#NUM!	#NUM!	#NUM!	#NUM!	#NUM!	#NUM!	#NUM!	status=LK
YER038W-A	YER038W-A		#NUM!	#NUM!	#NUM!	#NUM!	#NUM!	#NUM!	#NUM!	status=LK
YER039C	HVG1		#NUM!	#NUM!	#NUM!	#NUM!	#NUM!	#NUM!	#NUM!	status=LK
YER039C-A	YER039C-A		#NUM!	#NUM!	#NUM!	#NUM!	#NUM!	#NUM!	#NUM!	status=LK
YER041W	YEN1		1.00957	0.025	0.98289	0.076	0.03245	0.025	0.00021	status=JK
YER042W	MXR1		0.93927	0.022	0.93397	0.066	-0.00672	0.022	0
YER044C-A	MEI4		0.86068	0.111	0.89209	0.125	-0.06023	0.111	0.00059
YER045C	ACA1		1.00319	0.049	0.99532	0.1	-0.00514	0.049	3e-05
YER046W	SPO73		1.04979	0.102	1.11073	0.009	-0.06428	0.102	0.00025
YER046W-A	YER046W-A		1.00353	0.063	0.98815	0.09	0.03067	0.063	7e-05
YER047C	SAP1		0.93572	0.095	0.92955	0.083	0.02898	0.095	0.00029
YER048C	CAJ1		0.93586	0.015	0.91134	0.004	0.02342	0.015	8e-05	status=JK
YER049W	TPA1		0.97913	0.047	0.92976	0.046	0.05332	0.047	3e-05
YER051W	JHD1		1.00886	0.008	1.02501	0.012	-0.01799	0.008	2e-05	status=JK
YER052C	HOM3		0.96551	0.084	0.97116	0.069	-0.0074	0.084	0.00018
YER053C	PIC2		1.12891	0.06	1.08558	0.037	0.0456	0.06	4e-05
YER054C	GIP2		1.13618	0.066	1.0968	0.013	0.04285	0.066	5e-05
YER055C	HIS1		0.14163	0.006	0.13634	0.012	0.00427	0.006	3e-05
YER056C	FCY2		1.12736	0.087	1.14785	0.084	-0.02599	0.087	0.00012
YER056C-A	RPL34A		0.97616	0.043	0.87199	0.107	0.07965	0.043	2e-05
YER057C	HMF1		1.0711	0.045	1.13577	0.037	-0.0718	0.045	2e-05
YER059W	PCL6		1.06778	0.016	0.95324	0.012	0.11761	0.016	8e-05	status=JK
YER060W	FCY21		0.99813	0.052	0.96158	0.072	0.03579	0.052	4e-05
YER060W-A	FCY22		1.04775	0.026	1.01762	0.025	0.0319	0.026	0
YER061C	CEM1		0.7272	0.029	0.8336	0.047	-0.11877	0.029	0.00052	status=JK
YER062C	HOR2		0.99935	0.046	1.05413	0.042	-0.04803	0.046	3e-05
YER063W	THO1		1.00006	0.04	0.95506	0.038	0.05156	0.04	2e-05
YER064C	VHR2		0.97633	0.059	0.98221	0.055	-0.00438	0.059	6e-05
YER065C	ICL1		0.99449	0.022	1.04928	0.071	-0.04093	0.022	0.00017	status=JK
YER066C-A	YER066C-A		0.99141	0.03	0.98343	0.004	0.00795	0.03	1e-05
YER066W	RRT13		0.95374	0.035	0.99283	0.018	-0.04268	0.035	1e-05
YER067C-A	YER067C-A		1.01453	0.006	1.00091	0.044	0.01597	0.006	1e-05	status=JK
YER067W	RGI1		1.04291	0.068	1.0331	0.086	0.03416	0.068	8e-05
YER069W	ARG5		0.14196	0.009	0.1601	0.007	-0.0162	0.009	8e-05
YER071C	TDA2		1.06697	0.002	1.03867	0.042	0.03144	0.002	0	status=JK
YER072W	VTC1		1.03572	0.041	1.05642	0.046	-0.02044	0.041	2e-05
YER073W	ALD5		1.02383	0.02	1.01817	0.027	0.00578	0.02	0
YER074W	RPS24A		0.58101	0.022	0.53416	0.051	0.04755	0.022	0.00047	status=JK
YER075C	PTP3		0.98455	0.026	0.99166	0.073	-0.02147	0.026	1e-05
YER077C	YER077C		1.00321	0.026	0.98715	0.028	0.02288	0.026	0
YER078C	ICP55		1.02447	0.018	0.9394	0.027	0.08054	0.018	0.0001	status=JK
YER079W	YER079W		1.02251	0.015	0.959	0.065	0.05387	0.015	7e-05	status=JK
YER080W	AIM9		1.05849	0.053	0.99757	0.101	0.04149	0.053	3e-05
YER081W	SER3		1.03781	0.075	1.01445	0.023	0.03012	0.075	0.0001
YER083C	GET2		0.83572	0.011	0.868	0.072	-0.04314	0.011	6e-05	status=JK
YER084W	YER084W		0.9441	0.046	0.94617	0.031	0.00683	0.046	3e-05
YER085C	YER085C		1.08773	0.025	1.09812	0.056	-0.02403	0.025	0
YER087C-A	YER087C-A		1.06192	0.021	1.02065	0.051	0.03237	0.021	0
YER088C	DOT6		0.96712	0.012	0.97297	0.076	-0.00984	0.012	5e-05	status=JK
YER089C	PTC2		1.00297	0.033	0.95657	0.1	0.0479	0.033	1e-05
YER090W	TRP2		1.09438	0.106	1.14762	0.116	-0.0614	0.106	0.00025
YER091C	MET6		0.98048	0.038	0.96736	0.019	0.01395	0.038	0.00049	status=JK
YER091C-A	YER091C-A		1.04909	0.021	1.05589	0.016	-0.0027	0.021	0
YER092W	IES5		0.87855	0.023	0.94099	0.034	-0.05695	0.023	1e-05
YER093C-A	AIM11		0.81476	0.033	0.6072	0.078	0.22563	0.033	2e-05
YER095W	RAD51		0.92147	0.038	0.92342	0.055	8e-05	0.038	2e-05
YER096W	SHC1		0.93815	0.015	1.00132	0.051	-0.06524	0.015	9e-05	status=JK
YER097W	YER097W		0.99785	0.036	1.02051	0.02	-0.01868	0.036	1e-05
YER098W	UBP9		1.05633	0.016	1.0681	0.047	-0.01015	0.016	0
YER101C	AST2		1.01263	0.023	0.98644	0.032	0.02535	0.023	0
YER106W	MAM1		0.96563	0.143	1.00872	0.135	-0.02716	0.143	0.00088
YER108C	YER108C		1.0775	0.015	1.06222	0.075	0.01863	0.015	6e-05	status=JK
YER109C	FLO8		0.99491	0.061	1.06038	0.042	-0.06649	0.061	6e-05
YER111C	SWI4		0.95996	0.049	0.81864	0.129	0.13616	0.049	4e-05
YER113C	TMN3		1.03605	0.009	1.04841	0.044	-0.00178	0.009	0
YER114C	BOI2		1.11612	0.083	1.03471	0.039	0.09019	0.083	0.00011
YER115C	SPR6		1.08155	0.022	1.09255	0.015	-0.00889	0.022	0
YER116C	SLX8		0.2317	0.025	0.25428	0.034	-0.02533	0.025	0.00377	status=JK
YER117W	RPL23B		1.00367	0.034	0.93644	0.1	0.07689	0.034	1e-05
YER118C	SHO1		1.00916	0.03	1.02839	0.077	-0.01521	0.03	1e-05
YER119C	AVT6		0.98983	0.012	1.06219	0.098	-0.09967	0.012	5e-05	status=JK
YER119C-A	YER119C-A		0.85432	0.032	0.90842	0.057	-0.04917	0.032	2e-05
YER120W	SCS2		0.87027	0.026	0.86676	0.004	0.00551	0.026	1e-05
YER121W	YER121W		1.05876	0.019	1.14315	0.019	-0.07652	0.019	0.00011	status=JK
YER123W	YCK3		0.92404	0.035	0.95963	0.063	-0.02829	0.035	2e-05
YER124C	DSE1		0.9975	0.064	0.98964	0.078	-0.0088	0.064	7e-05
YER128W	VFA1		1.04087	0.037	1.02616	0.024	0.01885	0.037	1e-05
YER129W	SAK1		0.979	0.001	1.03224	0.039	-0.05975	0.001	0	status=JK
YER130C	YER130C		0.9952	0.004	0.97411	0.067	0.0054	0.004	1e-05	status=JK
YER131W	RPS26B		0.91082	0.02	0.86324	0.128	0.07007	0.02	0.00017	status=JK
YER132C	PMD1		1.04244	0.037	1.07351	0.074	-0.04001	0.037	1e-05
YER134C	YER134C		1.00085	0.057	0.92238	0.121	0.06448	0.057	5e-05
YER135C	YER135C		0.88397	0.272	0.94696	0.168	-0.0641	0.272	0.00741
YER137C	YER137C		1.00104	0.007	1.05332	0.101	-0.04678	0.007	2e-05	status=JK
YER139C	RTR1		0.77932	0.12	0.84439	0.019	-0.06429	0.12	0.00098
YER140W	YER140W		1.02057	0.047	1.01373	0.05	0.00826	0.047	3e-05
YER142C	MAG1		0.99414	0.012	1.01448	0.05	-0.02608	0.012	0
YER143W	DDI1		1.03065	0.019	1.13724	0.129	-0.08409	0.019	0.00011	status=JK
YER144C	UBP5		1.09607	0.093	1.07261	0.13	0.01078	0.093	0.00017
YER145C	FTR1		0.93622	0.061	1.02281	0.062	-0.09624	0.061	8e-05
YER149C	PEA2		0.92605	0.072	0.97516	0.053	-0.04993	0.072	0.00013
YER150W	SPI1		0.94862	0.004	1.01688	0.06	-0.08469	0.004	0	status=JK
YER151C	UBP3		0.94469	0.049	0.6633	0.078	0.25738	0.049	4e-05
YER152C	YER152C		1.02298	0.032	1.07049	0.005	-0.04975	0.032	1e-05
YER153C	PET122		0.613	0.007	0.86852	0.046	-0.2642	0.007	5e-05	status=JK
YER155C	BEM2		0.88397	0.019	0.84243	0.029	0.04366	0.019	0.00016	status=JK
YER156C	YER156C		1.02182	0.039	0.99791	0.071	0.02413	0.039	2e-05
YER158C	YER158C		1.20474	0.076	1.13264	0.027	0.06982	0.076	7e-05
YER161C	SPT2		0.92018	0.095	0.94984	0.093	-0.02154	0.095	0.0003
YER162C	RAD4		0.81378	0.066	0.78476	0.266	0.01045	0.066	0.00015
YER163C	GCG1		0.99373	0.039	0.99018	0.093	0.0134	0.039	2e-05
YER164W	CHD1		1.11049	0.048	1.06067	0.077	0.03986	0.048	2e-05
YER166W	DNF1		0.95182	0.013	1.03396	0.073	-0.06313	0.013	6e-05	status=JK
YER167W	BCK2		1.02044	0.039	1.01782	0.022	0.00653	0.039	2e-05
YER170W	ADK2		1.02346	0.03	1.02481	0.034	-0.00491	0.03	1e-05
YER173W	RAD24		1.02278	0.014	0.99702	0.015	0.0236	0.014	6e-05	status=JK
YER174C	GRX4		1.02764	0.008	1.00423	0.01	0.01894	0.008	2e-05	status=JK
YER175C	TMT1		0.98395	0.035	0.96885	0.008	0.01234	0.035	1e-05
YER176W	ECM32		0.97437	0.009	0.98633	0.022	-0.01013	0.009	3e-05	status=JK
YER177W	BMH1		0.80255	0.107	0.83704	0.055	-0.04588	0.107	0.00065
YER178W	PDA1		0.80311	0.029	0.774	0.052	0.02129	0.029	1e-05
YER179W	DMC1		0.97458	0.006	0.93803	0.057	0.02901	0.006	0
YER180C	ISC10		1.01547	0.039	1.04603	0.028	-0.03946	0.039	2e-05
YER181C	YER181C		1.00324	0.006	0.98821	0.032	0.01222	0.006	1e-05	status=JK
YER182W	FMP10		0.99755	0.026	0.93465	0.024	0.07318	0.026	0
YER183C	FAU1		1.03345	0.008	1.04222	0.067	-0.00656	0.008	2e-05	status=JK
YER184C	YER184C		1.00895	0.015	1.08434	0.038	-0.07661	0.015	0
YER185W	PUG1		1.01349	0.061	1.01794	0.029	-0.00601	0.061	6e-05
YER186C	YER186C		0.99241	0.042	0.96531	0.026	0.04118	0.042	2e-05
YER187W	YER187W		1.0718	0.041	1.05042	0.024	0.01363	0.041	2e-05
YER188W	YER188W		1.07282	0.024	0.99171	0.057	0.07196	0.024	0
YFL001W	DEG1		0.8491	0.028	0.67565	0.075	0.1645	0.028	1e-05
YFL003C	MSH4		0.94565	0.068	0.96473	0.001	-0.01782	0.068	0.0001
YFL004W	VTC2		0.98686	0.047	0.96957	0.035	0.02057	0.047	3e-05
YFL006W	YFL006W		0.95391	0.065	0.94807	0.083	0.00958	0.065	9e-05
YFL007W	BLM10		1.00405	0.049	0.95738	0.055	0.03247	0.049	3e-05
YFL010C	WWM1		1.06738	0.056	1.0356	0.129	0.02275	0.056	0.00093	status=JK
YFL010W-A	AUA1		1.04096	0.007	1.07293	0.036	-0.03677	0.007	2e-05	status=JK
YFL011W	HXT10		0.98452	0.045	1.0034	0.07	-0.03464	0.045	3e-05
YFL012W	YFL012W		1.05107	0.007	1.05372	0.052	0.00883	0.007	1e-05	status=JK
YFL013C	IES1		1.02152	0.037	0.89387	0.041	0.14884	0.037	1e-05
YFL013W-A	YFL013W-A		0.89115	0.037	0.8609	0.047	0.02613	0.037	2e-05
YFL014W	HSP12		1.08562	0.028	1.12555	0.031	-0.03794	0.028	0
YFL015C	YFL015C		1.07231	0.043	1.10279	0.051	-0.00574	0.043	0.00053	status=JK
YFL018C	LPD1		0.6978	0.022	0.83789	0.027	-0.12909	0.022	1e-05
YFL019C	YFL019C		0.98585	0.056	1.02121	0.038	-0.02701	0.056	5e-05
YFL020C	PAU5		1.03979	0.029	1.08792	0.061	-0.03591	0.029	1e-05
YFL021W	GAT1		1.10354	0.009	1.07039	0.072	0.02486	0.009	2e-05	status=JK
YFL023W	BUD27		0.79111	0.048	0.78386	0.052	0.01505	0.048	6e-05
YFL025C	BST1		1.00503	0.059	1.09106	0.125	-0.09474	0.059	6e-05
YFL026W	STE2		0	0	0	0	0	0	#NUM!
YFL027C	GYP8		1.03819	0.082	1.02797	0.049	0.01893	0.082	0.00013
YFL028C	CAF16		1.0137	0.027	1.02785	0.031	-0.01376	0.027	1e-05
YFL030W	AGX1		1.02372	0.018	0.95104	0.091	0.0623	0.018	0
YFL031W	HAC1		1.0266	0.118	0.92216	0.017	0.10662	0.118	0.00041
YFL032W	YFL032W		0.99614	0.022	0.96439	0.038	0.02858	0.021	0.00016	status=JK
YFL033C	RIM15		1.04791	0.031	1.06491	0.071	-0.02068	0.031	1e-05
YFL034C-A	RPL22B		1.05265	0.046	1.04055	0.078	0.0018	0.046	2e-05
YFL034W	YFL034W		1.03711	0.067	1.00395	0.066	0.04508	0.067	0.00138	status=JK
YFL035C-B	YFL035C-B		1.05902	0.04	1.02282	0.07	0.04202	0.04	1e-05
YFL036W	RPO41		0.87973	0.096	0.88267	0.006	-0.00251	0.096	0.00035
YFL040W	YFL040W		0.95887	0.026	0.9876	0.04	-0.01586	0.026	0.00025	status=JK
YFL041W	FET5		1.09144	0.005	1.08213	0.042	0.01801	0.005	1e-05	status=JK
YFL042C	YFL042C		1.04674	0.038	1.05711	0.042	0.00073	0.038	1e-05
YFL043C	YFL043C		1.02502	0.021	1.04471	0.017	-0.01854	0.021	0
YFL044C	OTU1		0.97148	0.021	0.9929	0.058	-0.0185	0.021	0
YFL046W	FMP32		0.96554	0.053	0.95512	0.073	-0.01268	0.053	5e-05
YFL047W	RGD2		0.98407	0.03	1.00148	0.054	-0.02972	0.03	0.00031	status=JK
YFL048C	EMP47		1.00851	0.031	1.0204	0.095	-0.00451	0.031	1e-05
YFL049W	SWP82		1.08414	0.045	1.04787	0.117	0.04059	0.045	2e-05
YFL050C	ALR2		0.94856	0.066	0.97839	0.035	-0.02686	0.066	9e-05
YFL051C	YFL051C		0.96317	0.095	0.93044	0.048	0.0448	0.095	0.00026
YFL052W	YFL052W		0.99553	0.057	0.98809	0.02	0.00502	0.057	5e-05
YFL053W	DAK2		1.01069	0.062	1.04696	0.031	-0.0346	0.062	6e-05
YFL054C	YFL054C		1.10622	0.05	1.10846	0.051	-0.01558	0.05	3e-05
YFL055W	AGP3		1.04404	0.038	1.04624	0.005	0.00065	0.038	1e-05
YFL056C	AAD6		1.00236	0.041	0.9396	0.112	0.04131	0.04	2e-05
YFL063W	YFL063W		0.98852	0.023	1.06719	0.065	-0.06503	0.023	0
YFR006W	YFR006W		1.06205	0.044	1.03735	0.033	0.02408	0.044	2e-05
YFR007W	YFH7		1.01306	0.027	1.0444	0.006	-0.03277	0.027	1e-05
YFR008W	FAR7		1.03009	0.076	1.07686	0.027	-0.04484	0.076	0.00011
YFR009W	GCN20		0.91123	0.009	0.97127	0.027	-0.05438	0.009	3e-05	status=JK
YFR010W	UBP6		0.58312	0.013	0.64713	0.078	-0.06593	0.013	0.00016	status=JK
YFR011C	AIM13		0.95945	0.041	0.88719	0.058	0.09709	0.041	2e-05
YFR012W	DCV1		0.96637	0.021	1.04229	0.051	-0.07743	0.021	0
YFR013W	IOC3		1.01263	0.075	1.03613	0.017	-0.0172	0.074	0.00011
YFR014C	CMK1		1.0311	0.041	1.05505	0.054	-0.01493	0.041	2e-05
YFR015C	GSY1		1.04564	0.072	1.06377	0.103	-0.00389	0.072	9e-05
YFR016C	YFR016C		0.98796	0.042	0.99306	0.052	0.00708	0.041	2e-05
YFR017C	IGD1		0.98698	0.044	0.95576	0.051	0.02976	0.044	2e-05
YFR018C	YFR018C		1.0145	0.069	1.00481	0.04	0.02105	0.069	9e-05
YFR019W	FAB1		0.66947	0.016	0.65744	0.066	0.03045	0.016	0.00019	status=JK
YFR020W	YFR020W		1.07936	0.013	1.03919	0.023	0.05108	0.013	5e-05	status=JK
YFR021W	ATG18		0.93753	0.059	0.88857	0.073	0.06697	0.059	7e-05
YFR022W	ROG3		1.07098	0.047	1.08458	0.024	-0.01813	0.047	2e-05
YFR023W	PES4		0.97052	0.012	0.99827	0.01	-0.03174	0.012	5e-05	status=JK
YFR024C	YFR024C		1.03172	0.046	0.95025	0.106	0.10125	0.046	2e-05
YFR024C-A	LSB3		1.05175	0.087	1.02193	0.03	0.03313	0.086	0.00015
YFR025C	HIS2		0.15052	0.016	0.1448	0.009	0.00328	0.016	0.00376	status=JK
YFR026C	ULI1		1.08787	0.003	1.05547	0.003	0.03159	0.003	0	status=JK
YFR030W	MET10		1.00345	0.01	1.04257	0.041	-0.04405	0.01	0
YFR031C-A	RPL2A		0.92961	0.062	0.9859	0.084	-0.05265	0.062	8e-05
YFR032C	RRT5		1.0517	0.037	1.05488	0.085	0.01361	0.037	1e-05
YFR032C-A	RPL29		0.85341	0.101	0.89277	0.014	-0.03902	0.101	0.00045
YFR033C	QCR6		0.90192	0.049	0.89175	0.059	0.00415	0.049	5e-05
YFR034C	PHO4		0.98383	0.018	0.99876	0.031	-0.01079	0.018	0
YFR035C	YFR035C		0.99435	0.06	0.95034	0.039	0.05761	0.06	6e-05
YFR038W	IRC5		0.99731	0.087	1.01853	0.049	-0.00968	0.087	0.00018
YFR039C	YFR039C		1.00169	0.018	1.03416	0.024	-0.02849	0.017	0
YFR040W	SAP155		1.04068	0.021	1.07922	0.037	-0.04742	0.021	0
YFR041C	ERJ5		1.04393	0.011	1.00998	0.053	0.01706	0.011	0
YFR043C	IRC6		1.03987	0.034	1.06402	0.056	-0.03089	0.034	1e-05
YFR044C	DUG1		1.03994	0.011	1.10914	0.036	-0.06104	0.011	4e-05	status=JK
YFR045W	YFR045W		0.98893	0.034	1.08517	0.069	-0.08512	0.034	1e-05
YFR046C	CNN1		1.04712	0.028	1.07059	0.002	-0.02304	0.028	1e-05
YFR047C	BNA6		0.91953	0.05	0.92651	0.015	-0.0069	0.05	4e-05
YFR048W	RMD8		0.99179	0.037	0.94234	0.059	0.04613	0.037	1e-05
YFR049W	YMR31		1.06854	0.045	1.03461	0.011	0.03279	0.045	2e-05
YFR053C	HXK1		0.97864	0.064	0.97637	0.03	-0.00044	0.064	8e-05
YFR054C	YFR054C		1.05608	0.036	1.01222	0.048	0.044	0.036	1e-05
YFR055W	IRC7		1.01934	0.051	1.0017	0.017	0.01386	0.051	4e-05
YFR056C	YFR056C		1.01099	0.068	1.01761	0.039	-0.00175	0.068	8e-05
YFR057W	YFR057W		1.07783	0.047	1.06772	0.031	0.00769	0.047	2e-05
YGL002W	ERP6		0.99616	0.055	1.01706	0.005	-0.02174	0.055	5e-05
YGL004C	RPN14		1.01199	0.023	0.95575	0.017	0.05754	0.023	0
YGL005C	COG7		0.84206	0.052	0.84007	0.073	0.01681	0.052	6e-05
YGL006W	PMC1		1.06915	0.008	1.07072	0.055	0.00953	0.008	0
YGL007W	YGL007W		0.82393	0.037	0.97878	0.011	-0.16095	0.037	2e-05
YGL009C	LEU1		0.24117	0.01	0.22278	0.01	0.01776	0.01	2e-05
YGL010W	YGL010W		1.03921	0.034	1.03556	0.077	0.0089	0.034	1e-05
YGL013C	PDR1		1.01111	0.039	1.00712	0.019	0.00481	0.039	2e-05
YGL014W	PUF4		1.07016	0.05	1.08981	0.042	-0.02824	0.05	3e-05
YGL015C	YGL015C		1.03983	0.025	0.99685	0.062	0.03054	0.025	0
YGL016W	KAP122		0.89263	0.032	0.70733	0.099	0.20707	0.032	1e-05
YGL017W	ATE1		1.02624	0.019	1.02031	0.072	-0.00993	0.019	0.00011	status=JK
YGL019W	CKB1		0.90272	0.021	0.81872	0.098	0.06514	0.021	0.00019	status=JK
YGL020C	GET1		0.88535	0.058	0.98203	0.067	-0.08594	0.058	8e-05
YGL021W	ALK1		1.00872	0.02	0.99165	0.066	0.02246	0.02	0.00014	status=JK
YGL023C	PIB2		1.00973	0.085	1.05815	0.086	-0.05332	0.085	0.00016
YGL024W	YGL024W		0.55081	0.069	0.96028	0.024	-0.40454	0.069	0.00052
YGL026C	TRP5		0	0	0	0	0	0	#NUM!
YGL027C	CWH41		0.98321	0.033	1.03379	0.061	-0.03868	0.032	1e-05
YGL028C	SCW11		1.01079	0.011	1.11154	0.063	-0.11685	0.011	0
YGL029W	CGR1		0.91575	0.01	0.87417	0.021	0.04691	0.01	4e-05	status=JK
YGL031C	RPL24A		0.70859	0.031	0.86373	0.046	-0.14432	0.031	0.00064	status=JK
YGL032C	AGA2		1.03972	0.021	1.09454	0.07	-0.0603	0.021	0
YGL034C	YGL034C		1.04871	0.042	1.05548	0.019	-0.01126	0.042	2e-05
YGL035C	MIG1		0.99948	0.038	1.01207	0.013	-0.00993	0.038	1e-05
YGL036W	YGL036W		1.03959	0.08	0.94123	0.048	0.09303	0.08	0.00013
YGL037C	PNC1		1.03002	0.022	1.0201	0.044	-0.00191	0.022	0
YGL039W	YGL039W		1.07107	0.138	1.00977	0.024	0.05244	0.138	0.00059
YGL041C	YGL041C		0.9545	0.078	0.95712	0.063	0.00908	0.077	0.00015
YGL042C	YGL042C		0.98321	0.037	0.9263	0.019	0.06335	0.037	2e-05
YGL043W	DST1		0.77398	0.006	0.6056	0.023	0.1627	0.006	2e-05	status=JK
YGL045W	RIM8		0	0	0	0	0	0	#NUM!	status=JK
YGL046W	YGL046W		0.92583	0.04	0.87148	0.037	0.05868	0.04	2e-05
YGL049C	TIF4632		1.04744	0.035	1.08455	0.127	-0.02499	0.035	1e-05
YGL050W	TYW3		1.0585	0.013	1.00627	0.044	0.04609	0.013	5e-05	status=JK
YGL051W	MST27		1.0176	0.037	0.97155	0.134	0.01468	0.037	1e-05
YGL053W	PRM8		1.04385	0.006	1.10473	0.063	-0.05843	0.006	1e-05	status=JK
YGL054C	ERV14		0.99591	0.022	0.96409	0.076	0.02082	0.022	0.00016	status=JK
YGL056C	SDS23		0.92007	0.074	0.91246	0.166	-0.02572	0.074	0.00015
YGL057C	GEP7		0.78961	0.104	0.73409	0.215	0.03915	0.104	0.00062
YGL058W	RAD6		0.96533	0.136	1.01464	0.02	-0.04724	0.136	0.00076
YGL059W	PKP2		1.01344	0.004	1.11633	0.094	-0.08647	0.004	1e-05	status=JK
YGL060W	YBP2		0.95955	0.015	1.03317	0.076	-0.07418	0.015	0
YGL062W	PYC1		1.00104	0.04	0.94577	0.02	0.04947	0.04	2e-05
YGL063W	PUS2		0.98952	0.072	0.95403	0.106	0.00623	0.072	0.0001
YGL066W	SGF73		0.86141	0.035	0.64739	0.061	0.21643	0.035	0.00056	status=JK
YGL067W	NPY1		1.01882	0.038	1.0427	0.079	-0.01906	0.038	1e-05
YGL071W	AFT1		1.0248	0.027	1.05887	0.102	-0.04835	0.027	1e-05
YGL077C	HNM1		0.98497	0.009	0.9224	0.062	0.06347	0.009	3e-05	status=JK
YGL078C	DBP3		0.84092	0.041	0.89571	0.009	-0.05892	0.041	3e-05
YGL079W	KXD1		1.00956	0.05	0.97341	0.006	0.03668	0.05	3e-05
YGL080W	FMP37		0.84723	0.031	0.8277	0.055	0.02765	0.031	1e-05
YGL081W	YGL081W		1.0143	0.081	1.0308	0.092	0.01204	0.081	0.00014
YGL082W	YGL082W		1.03863	0.042	1.07141	0.089	-0.02818	0.042	2e-05
YGL083W	SCY1		1.09015	0.025	1.08123	0.034	0.0108	0.025	0
YGL084C	GUP1		0.95278	0.009	0.98599	0.107	-0.04695	0.009	3e-05	status=JK
YGL085W	LCL3		1.00703	0.006	0.99277	0.023	0.01904	0.006	1e-05	status=JK
YGL086W	MAD1		0.98083	0.028	0.94726	0.023	0.03277	0.028	1e-05
YGL087C	MMS2		0.99709	0.007	0.96291	0.01	0.0315	0.007	1e-05	status=JK
YGL089C	MF(ALPHA)2		1.05977	0.017	1.09277	0.029	-0.03152	0.017	0
YGL090W	LIF1		1.06159	0.078	1.0186	0.048	0.05244	0.077	0.00011
YGL094C	PAN2		0.99301	0.038	1.00911	0.018	-0.02336	0.038	2e-05
YGL096W	TOS8		0.98261	0.009	0.98635	0.05	0.00566	0.009	0
YGL101W	YGL101W		1.05006	0.041	1.04207	0.046	0.01938	0.041	2e-05
YGL104C	VPS73		1.00137	0.095	0.99734	0.025	-0.00631	0.094	0.00023
YGL105W	ARC1		0	0	0.02541	0.044	0	0	#NUM!
YGL108C	YGL108C		1.0597	0.036	1.11312	0.015	-0.0614	0.036	1e-05
YGL109W	YGL109W		1.01045	0.009	0.98645	0.046	0.01186	0.009	3e-05	status=JK
YGL110C	CUE3		0.96199	0.045	0.98034	0.037	-0.00861	0.045	3e-05
YGL114W	YGL114W		1.00337	0.019	1.01815	0.039	-0.02504	0.019	0
YGL115W	SNF4		0.68669	0.028	0.70655	0.064	-0.01969	0.028	2e-05
YGL117W	YGL117W		1.06519	0.018	1.0478	0.078	0.02604	0.018	0
YGL118C	YGL118C		1.00725	0.025	1.02597	0.042	-0.00937	0.025	0
YGL121C	GPG1		1.01014	0.059	1.07391	0.023	-0.05724	0.059	5e-05
YGL124C	MON1		0.86622	0.051	0.96423	0.025	-0.11121	0.051	6e-05
YGL125W	MET13		0.97662	0.013	0.97938	0.012	0.00112	0.013	6e-05	status=JK
YGL126W	SCS3		0.96946	0.074	0.95097	0.076	0.00464	0.074	0.00012
YGL127C	SOH1		0.21449	0.006	0.21516	0.003	-0.00191	0.006	0.00026	status=JK
YGL131C	SNT2		1.00382	0.009	1.08549	0.031	-0.08813	0.009	3e-05	status=JK
YGL132W	YGL132W		1.01906	0.004	1.0017	0.039	0.00826	0.004	1e-05	status=JK
YGL133W	ITC1		0.97726	0.047	1.01136	0.063	-0.03195	0.047	3e-05
YGL136C	MRM2		0.17622	0.112	0.38223	0.124	-0.18767	0.112	0.05153
YGL138C	YGL138C		1.05376	0.021	1.06677	0.055	-0.00829	0.021	0
YGL139W	FLC3		1.03573	0.027	1.04364	0.01	-0.00771	0.027	0
YGL140C	YGL140C		1.01038	0.023	1.06727	0.027	-0.05117	0.023	0.00017	status=JK
YGL141W	HUL5		1.02379	0.088	1.09272	0.093	-0.07151	0.088	0.00018
YGL144C	ROG1		1.05149	0.022	1.02017	0.061	0.0433	0.022	0
YGL146C	RRT6		1.01001	0.085	0.97861	0.054	0.04907	0.085	0.00017
YGL147C	RPL9A		0.85915	0.031	0.96147	0.032	-0.09392	0.031	1e-05
YGL148W	ARO2		0.83667	0.005	0.82515	0.046	0.01298	0.005	1e-05	status=JK
YGL149W	YGL149W		0.97672	0.07	1.09085	0.05	-0.11606	0.07	0.0001
YGL151W	NUT1		0.71334	0.012	0.89864	0.038	-0.1837	0.012	0.0001	status=JK
YGL152C	YGL152C		1.0209	0.014	1.03428	0.085	0.00324	0.014	6e-05	status=JK
YGL153W	PEX14		1.00524	0.004	1.03331	0.006	-0.02762	0.004	1e-05	status=JK
YGL154C	LYS5		0.16131	0.014	0.17279	0.014	-0.00971	0.014	0.00019
YGL156W	AMS1		0.9988	0.006	1.02817	0.031	-0.02832	0.006	1e-05	status=JK
YGL157W	ARI1		1.04428	0.022	1.02883	0.079	0.01365	0.022	0.00015	status=JK
YGL158W	RCK1		1.03185	0.024	0.97991	0.045	0.05754	0.024	0
YGL159W	YGL159W		1.07734	0.036	1.0855	0.097	-0.02505	0.036	1e-05
YGL160W	AIM14		0.92997	0.044	0.90055	0.059	0.03976	0.044	3e-05
YGL161C	YIP5		0.99064	0.032	1.01202	0.039	-0.02577	0.032	1e-05
YGL162W	SUT1		1.0039	0.024	1.00851	0.026	-0.01139	0.024	0
YGL163C	RAD54		1.02031	0.033	1.08572	0.023	-0.0562	0.033	1e-05
YGL164C	YRB30		1.0009	0.029	1.06103	0.087	-0.08809	0.029	1e-05
YGL165C	YGL165C		1.01714	0.035	1.03115	0.028	-0.01297	0.035	1e-05
YGL166W	CUP2		1.01581	0.036	1.06038	0.053	-0.03152	0.036	1e-05
YGL167C	PMR1		0.69945	0.012	0.6794	0.092	0.04093	0.012	0.0001	status=JK
YGL168W	HUR1		0.60938	0.041	0.57894	0.067	0.02946	0.041	8e-05
YGL170C	SPO74		0.97766	0.002	0.95663	0.029	0.03305	0.002	0
YGL173C	XRN1		0.28329	0.042	0.28922	0.043	-0.00946	0.042	0.00086
YGL174W	BUD13		0.60161	0.041	0.88014	0.033	-0.28057	0.041	9e-05
YGL175C	SAE2		0.99726	0.044	1.01626	0.037	-0.01755	0.044	2e-05
YGL176C	YGL176C		1.15143	0.036	1.07635	0.134	0.07634	0.036	1e-05
YGL177W	YGL177W		1.16917	0.067	1.20691	0.119	-0.01626	0.067	5e-05
YGL179C	TOS3		1.12356	0.016	1.05648	0.036	0.08186	0.016	7e-05	status=JK
YGL180W	ATG1		0.99919	0.043	0.90822	0.041	0.07311	0.042	2e-05
YGL181W	GTS1		1.00743	0.031	1.04805	0.034	-0.02646	0.031	1e-05
YGL194C	HOS2		0.57669	0.109	0.56188	0.054	0.01361	0.109	0.00179
YGL195W	GCN1		0.82745	0.016	0.96776	0.043	-0.13244	0.016	0
YGL196W	DSD1		0.90679	0.007	1.0625	0.015	-0.14763	0.007	2e-05	status=JK
YGL197W	MDS3		0.91463	0.005	0.78582	0.109	0.14736	0.005	1e-05	status=JK
YGL198W	YIP4		1.03393	0.049	1.18869	0.016	-0.15176	0.049	3e-05
YGL199C	YGL199C		1.11142	0.013	1.01416	0.127	0.10718	0.013	5e-05	status=JK
YGL202W	ARO8		0.95413	0.099	1.06126	0.083	-0.12904	0.099	0.00031
YGL203C	KEX1		1.04905	0.05	1.03491	0.023	0.00335	0.05	3e-05
YGL205W	POX1		0.95571	0.005	1.01571	0.046	-0.05487	0.005	1e-05	status=JK
YGL208W	SIP2		0.97293	0.067	1.03601	0.051	-0.06686	0.066	9e-05
YGL209W	MIG2		0.96082	0.033	1.00494	0.016	-0.04568	0.033	1e-05
YGL210W	YPT32		1.0173	0.039	1.00311	0.011	0.01874	0.039	2e-05
YGL211W	NCS6		0.79931	0.01	0.76349	0.028	0.03015	0.01	6e-05	status=JK
YGL212W	VAM7		0.75466	0.032	0.87449	0.08	-0.11808	0.032	2e-05
YGL213C	SKI8		0.85747	0.022	0.94016	0.037	-0.08076	0.022	0
YGL214W	YGL214W		0.28873	0.166	0.45075	0.261	-0.1257	0.166	0.0403
YGL215W	CLG1		1.02454	0.026	0.90436	0.1	0.11502	0.026	0
YGL216W	KIP3		0.98757	0.008	0.99977	0.007	-0.00996	0.008	0
YGL217C	YGL217C		0.96452	0.051	0.94887	0.046	0.00367	0.051	4e-05
YGL218W	YGL218W		0.66219	0.007	0.57436	0.041	0.08182	0.007	4e-05	status=JK
YGL219C	MDM34		0.96438	0.04	0.83761	0.045	0.1332	0.04	2e-05
YGL221C	NIF3		0.99307	0.02	1.02985	0.037	-0.03691	0.02	0
YGL222C	EDC1		1.01193	0.038	1.00951	0.031	0.00557	0.038	1e-05
YGL224C	SDT1		1.03219	0.032	1.0003	0.044	0.02862	0.032	1e-05
YGL226C-A	OST5		1.07644	0.045	1.04236	0.058	0.0403	0.044	2e-05
YGL226W	MTC3		1.00013	0.082	0.91689	0.093	0.07405	0.082	0.00015
YGL227W	VID30		0.999	0.017	0.9961	0.028	-0.00045	0.017	0
YGL228W	SHE10		1.03641	0.003	1.05372	0.039	-0.02491	0.003	0
YGL229C	SAP4		1.07579	0.06	1.05979	0.024	0.00331	0.06	5e-05
YGL230C	YGL230C		0.97537	0.013	0.9583	0.109	-0.01338	0.013	6e-05	status=JK
YGL231C	EMC4		1.04065	0.025	1.06573	0.012	-0.02451	0.025	0
YGL232W	TAN1		1.04642	0.031	1.02003	0.013	0.02872	0.031	1e-05
YGL234W	ADE5		1.03305	0.022	1.04281	0.033	-0.01642	0.022	0
YGL235W	YGL235W		0.85279	0.071	0.83946	0.034	-0.00508	0.071	0.00016
YGL236C	MTO1		0.84367	0.11	0.77508	0.077	0.07054	0.11	0.0006
YGL237C	HAP2		0.7156	0.067	0.73389	0.093	-0.02451	0.067	0.00023
YGL241W	KAP114		1.04307	0.039	1.04171	0.031	0.00192	0.039	1e-05
YGL242C	YGL242C		1.08014	0.017	1.09781	0.031	-0.02398	0.017	0
YGL243W	TAD1		0.99853	0.037	0.94346	0.037	0.06427	0.037	1e-05
YGL244W	RTF1		0.68804	0.011	0.62248	0.095	0.04403	0.011	8e-05	status=JK
YGL248W	PDE1		0.98258	0.014	1.05116	0.034	-0.06872	0.014	7e-05	status=JK
YGL249W	ZIP2		1.00183	0.026	0.93616	0.048	0.06522	0.026	0
YGL250W	RMR1		1.00979	0.025	0.96118	0.075	0.03864	0.025	0
YGL251C	HFM1		1.01521	0.051	1.03325	0.024	-0.02441	0.051	4e-05
YGL252C	RTG2		0.29731	0.056	0.36851	0.042	-0.06275	0.056	0.00179
YGL253W	HXK2		1.03551	0.03	1.12392	0.064	-0.07169	0.03	1e-05
YGL254W	FZF1		1.0484	0.098	1.02022	0.126	0.03534	0.098	0.00022
YGL255W	ZRT1		0.9325	0.045	0.91038	0.051	0.02737	0.045	3e-05
YGL256W	ADH4		1.0382	0.02	1.07155	0.068	-0.02929	0.02	0
YGL257C	MNT2		1.0068	0.016	1.01462	0.028	-0.00474	0.016	0
YGL258W	VEL1		0.98036	0.001	1.01823	0.013	-0.03374	0.001	0	status=JK
YGL259W	YPS5		1.01631	0.026	1.0352	0.021	-0.02438	0.026	0
YGL260W	YGL260W		1.04057	0.009	0.96904	0.086	0.0727	0.009	0
YGL261C	PAU11		1.00316	0.01	1.01774	0.067	-0.0116	0.01	0
YGL262W	YGL262W		1.01515	0.052	0.99023	0.051	0.02119	0.052	4e-05
YGL263W	COS12		1.03931	0.034	1.00288	0.054	0.04302	0.034	1e-05
YGR001C	YGR001C		0.99413	0.027	1.00563	0.099	-0.03128	0.027	0.00025	status=JK
YGR003W	CUL3		1.03247	0.058	1.08816	0.04	-0.04779	0.058	5e-05
YGR004W	PEX31		0.97855	0.036	1.01089	0.006	-0.0343	0.036	1e-05
YGR007W	ECT1		1.03153	0.011	1.0519	0.041	-0.02174	0.011	4e-05	status=JK
YGR008C	STF2		1.01031	0.054	1.01791	0	-0.00762	0.054	4e-05
YGR010W	NMA2		0.99996	0.066	0.9889	0.014	0.00758	0.065	8e-05
YGR011W	YGR011W		1.00298	0.006	0.97688	0.005	0.02642	0.006	1e-05	status=JK
YGR012W	YGR012W		1.01642	0.004	1.05991	0.032	-0.0378	0.004	0	status=JK
YGR014W	MSB2		1.0184	0.018	1.01042	0.112	-0.0156	0.018	0
YGR015C	YGR015C		1.04211	0.068	1.06221	0.087	-0.01465	0.068	8e-05
YGR016W	YGR016W		1.05051	0.04	1.01527	0.094	0.03784	0.04	2e-05
YGR017W	YGR017W		1.02569	0.016	1.03991	0.064	-0.01413	0.016	9e-05	status=JK
YGR018C	YGR018C		0.99684	0.083	1.08449	0.067	-0.08607	0.083	0.00016
YGR019W	UGA1		1.05205	0.025	1.11127	0.049	-0.06145	0.025	0.00018	status=JK
YGR021W	YGR021W		0.94729	0.018	1.00678	0.059	-0.07104	0.018	0.00012	status=JK
YGR022C	YGR022C		0.91064	0.028	0.92769	0.024	-0.02269	0.027	1e-05
YGR023W	MTL1		1.03519	0.029	0.98586	0.068	0.04394	0.029	1e-05
YGR025W	YGR025W		1.02286	0.008	0.974	0.066	0.04917	0.008	2e-05	status=JK
YGR026W	YGR026W		0.99069	0.011	0.98761	0.008	0.00489	0.011	4e-05	status=JK
YGR027C	RPS25A		0.85831	0.038	0.86438	0.067	-0.02372	0.038	2e-05
YGR028W	MSP1		0.98868	0.025	1.03013	0.02	-0.03022	0.025	0
YGR031W	IMO32		0.98194	0.044	0.8738	0.109	0.08546	0.044	2e-05
YGR032W	GSC2		1.0582	0.061	1.06103	0.044	-0.00427	0.061	5e-05
YGR033C	TIM21		1.03285	0.033	1.00682	0.028	0.03072	0.033	1e-05
YGR034W	RPL26B		0.98916	0.055	1.14289	0.039	-0.14282	0.054	5e-05
YGR035C	YGR035C		0.97871	0.066	1.05961	0.071	-0.09051	0.066	8e-05
YGR037C	ACB1		0.95393	0.012	0.88882	0.031	0.07354	0.012	6e-05	status=JK
YGR038W	ORM1		0.83176	0.068	0.89208	0.077	-0.07306	0.068	0.00015
YGR039W	YGR039W		1.0726	0.066	1.03116	0.114	0.01412	0.066	6e-05
YGR040W	KSS1		1.00672	0.022	1.06407	0.055	-0.04478	0.022	0
YGR041W	BUD9		0.97679	0.027	0.98526	0.054	-0.00314	0.027	1e-05
YGR042W	YGR042W		0.96613	0.028	0.93567	0.104	0.02355	0.028	1e-05
YGR043C	NQM1		1.04499	0.015	1.02065	0.087	0.01919	0.015	0
YGR044C	RME1		1.08518	0.056	1.03696	0.017	0.04393	0.056	4e-05
YGR045C	YGR045C		1.04749	0.002	1.05815	0.035	-0.00879	0.002	0	status=JK
YGR049W	SCM4		1.07378	0.066	1.04068	0.057	0.03883	0.066	6e-05
YGR050C	YGR050C		1.05777	0.007	1.08352	0.059	-0.01501	0.007	1e-05	status=JK
YGR051C	YGR051C		1.15925	0.101	1.14613	0.016	0.0111	0.1	0.00018
YGR052W	FMP48		1.02478	0.072	1.10847	0.071	-0.07953	0.072	9e-05
YGR053C	YGR053C		0.97028	0.022	1.01541	0.015	-0.03851	0.022	0
YGR054W	YGR054W		1.03919	0.01	1.03021	0.033	0.01529	0.01	0
YGR055W	MUP1		0.93646	0.06	0.92262	0.083	-0.00262	0.06	7e-05
YGR058W	PEF1		0.99499	0.004	0.97353	0.02	0.02557	0.004	0	status=JK
YGR059W	SPR3		0.99266	0.01	1.024	0.04	-0.02519	0.01	4e-05	status=JK
YGR061C	ADE6		1.01881	0.066	1.05887	0.111	-0.02895	0.066	0.00139	status=JK
YGR066C	YGR066C		1.04103	0.039	1.01214	0.055	0.02668	0.039	1e-05
YGR067C	YGR067C		1.08256	0.035	1.08632	0.028	-0.00504	0.035	1e-05
YGR068C	ART5		1.04229	0.061	1.08561	0.081	-0.03661	0.061	5e-05
YGR069W	YGR069W		1.00034	0.047	1.0289	0.051	-0.02897	0.047	3e-05
YGR070W	ROM1		1.03175	0.009	1.06575	0.037	-0.02766	0.009	0
YGR071C	ENV11		0.98424	0.043	0.94305	0.042	0.04092	0.043	2e-05
YGR072W	UPF3		0.89817	0.006	0.957	0.062	-0.04469	0.006	2e-05	status=JK
YGR077C	PEX8		0.89098	0.005	0.96125	0.022	-0.07454	0.005	1e-05	status=JK
YGR078C	PAC10		0.78753	0.101	0.6856	0.026	0.09651	0.101	0.00057
YGR079W	YGR079W		0.96794	0.012	0.95984	0.04	0.00839	0.012	0
YGR080W	TWF1		0.97814	0.029	1.01054	0.02	-0.03427	0.029	1e-05
YGR081C	SLX9		0.88191	0.012	0.79216	0.013	0.08868	0.012	6e-05	status=JK
YGR084C	MRP13		1.01449	0.031	1.01236	0.041	-0.00364	0.031	1e-05
YGR085C	RPL11B		0.91049	0.015	0.93365	0.017	-0.02367	0.015	0
YGR086C	PIL1		1.03809	0.07	1.07936	0.011	-0.04153	0.069	8e-05
YGR087C	PDC6		1.01046	0.001	1.08679	0.01	-0.07759	0.001	0	status=JK
YGR088W	CTT1		1.07655	0.037	1.08494	0.072	-0.023	0.036	1e-05
YGR089W	NNF2		1.01678	0.069	1.01835	0.079	-0.00311	0.068	8e-05
YGR092W	DBF2		0.44745	0.098	0.50299	0.07	-0.03896	0.097	0.00274
YGR093W	YGR093W		0.99769	0.034	0.98859	0.043	0.01974	0.034	1e-05
YGR096W	TPC1		1.00421	0.018	0.99008	0.04	0.00446	0.017	0
YGR097W	ASK10		0.99897	0.053	0.84171	0.203	0.1188	0.053	4e-05
YGR100W	MDR1		1.00021	0.017	0.99366	0.042	-0.00271	0.017	9e-05	status=JK
YGR101W	PCP1		0.93161	0.013	0.90065	0.033	0.02847	0.013	6e-05	status=JK
YGR105W	VMA21		0.23713	0.024	0.23764	0.094	-0.02232	0.024	0.00339	status=JK
YGR106C	VOA1		1.0484	0.032	1.01941	0.03	0.02997	0.032	1e-05
YGR107W	YGR107W		0.96499	0.059	0.99815	0.073	-0.05081	0.059	6e-05
YGR108W	CLB1		1.01854	0.034	1.1058	0.058	-0.08941	0.034	1e-05
YGR109C	CLB6		1.04963	0.022	0.99824	0.055	0.04618	0.022	0
YGR110W	CLD1		0.98903	0.02	1.06077	0.076	-0.06326	0.019	0.00013	status=JK
YGR111W	YGR111W		0.95727	0.091	0.99862	0.108	-0.02928	0.091	0.00024
YGR117C	YGR117C		0.96943	0.014	1.03149	0.037	-0.06909	0.014	0
YGR118W	RPS23A		0.89779	0.012	0.90043	0.07	0.01275	0.012	6e-05	status=JK
YGR121C	MEP1		1.00834	0.025	0.99579	0.018	0.00967	0.025	0
YGR122C-A	YGR122C-A		0.95664	0.072	0.96844	0.093	0.00511	0.072	0.00012
YGR122W	YGR122W		0.928	0.051	0.88823	0.084	0.02984	0.051	4e-05
YGR123C	PPT1		1.0956	0.022	1.08995	0.016	0.01077	0.022	0
YGR124W	ASN2		1.03741	0.067	0.9726	0.017	0.05652	0.067	7e-05
YGR125W	YGR125W		0.91499	0.057	0.84059	0.069	0.0617	0.057	0.0013	status=JK
YGR126W	YGR126W		1.00356	0.016	1.02572	0.019	-0.02476	0.016	9e-05	status=JK
YGR127W	YGR127W		0.9265	0.14	1.00916	0.016	-0.08078	0.14	0.00094
YGR129W	SYF2		0.99204	0.019	0.99762	0.032	-0.00409	0.019	0
YGR130C	YGR130C		0.99884	0.019	0.96729	0.047	0.02296	0.019	0
YGR131W	FHN1		1.03831	0.046	1.00327	0.102	0.00752	0.046	2e-05
YGR132C	PHB1		0.95335	0.035	0.84242	0.043	0.11062	0.035	1e-05
YGR133W	PEX4		1.01166	0.006	1.03867	0.055	-0.03756	0.006	1e-05	status=JK
YGR134W	CAF130		1.01639	0.002	1.01951	0.047	0.00812	0.002	0	status=JK
YGR135W	PRE9		0.87452	0.052	0.92572	0.057	-0.04604	0.052	6e-05
YGR136W	LSB1		1.01994	0.039	1.00148	0.02	0.02159	0.039	1e-05
YGR137W	YGR137W		1.03823	0.113	1.03292	0.132	0.00865	0.113	0.00035
YGR138C	TPO2		1.02585	0.038	1.02257	0.03	0.00386	0.038	1e-05
YGR139W	YGR139W		1.09001	0.024	1.01677	0.127	0.09769	0.024	0.00016	status=JK
YGR141W	VPS62		1.04822	0.062	1.01687	0.027	0.03454	0.062	6e-05
YGR142W	BTN2		0.95841	0.023	0.94622	0.006	0.01248	0.023	0
YGR143W	SKN1		1.01888	0.011	0.94062	0.03	0.09501	0.011	4e-05	status=JK
YGR144W	THI4		1.02843	0.008	1.10225	0.071	-0.07215	0.008	2e-05	status=JK
YGR146C	ECL1		1.09979	0.01	1.13682	0.041	-0.03739	0.01	3e-05	status=JK
YGR148C	RPL24B		0.85682	0.049	0.97702	0.034	-0.11585	0.049	5e-05
YGR149W	YGR149W		1.06611	0.036	1.07013	0.011	-0.00653	0.036	1e-05
YGR151C	YGR151C		1.12819	0.037	1.08821	0.069	0.02208	0.037	1e-05
YGR152C	RSR1		1.06499	0.024	0.99963	0.033	0.06208	0.024	0.00017	status=JK
YGR153W	YGR153W		0.98312	0.019	0.98234	0.054	0.00403	0.019	0
YGR154C	GTO1		0.97926	0.041	0.96123	0.13	-0.02162	0.041	2e-05
YGR157W	CHO2		0.49268	0.041	0.29667	0.032	0.19932	0.041	0.00016
YGR161C	RTS3		1.02501	0.036	1.01068	0.057	0.03268	0.036	1e-05
YGR163W	GTR2		0.83147	0.036	0.79853	0.037	0.04671	0.035	0.00061	status=JK
YGR164W	YGR164W		0.97427	0.022	0.97998	0.043	0.00102	0.022	0.00017	status=JK
YGR166W	TRS65		0.94549	0.037	1.04259	0.066	-0.10506	0.037	2e-05
YGR168C	YGR168C		0.97451	0.039	0.98572	0.086	0.01098	0.039	0.00054	status=JK
YGR169C	PUS6		1.0175	0.035	1.00537	0.048	0.02231	0.035	1e-05
YGR170W	PSD2		0.88256	0.045	0.89787	0.053	-0.01271	0.045	4e-05
YGR173W	RBG2		0.99431	0.127	0.98361	0.016	0.01224	0.127	0.00056
YGR174C	CBP4		0.8295	0.054	0.8573	0.054	-0.03729	0.054	7e-05
YGR176W	YGR176W		1.14968	0.006	1.02708	0.036	0.12485	0.006	1e-05	status=JK
YGR177C	ATF2		1.13756	0.023	1.04295	0.033	0.08969	0.023	0
YGR178C	PBP1		1.09082	0.078	1.03262	0.014	0.05624	0.078	0.0001
YGR181W	TIM13		1.06292	0.077	1.03912	0.055	0.01414	0.077	0.00011
YGR182C	YGR182C		1.0295	0.01	0.92743	0.104	0.07857	0.01	3e-05	status=JK
YGR183C	QCR9		0.80013	0.112	0.8584	0.044	-0.07739	0.111	0.00073
YGR184C	UBR1		0.9704	0.003	0.93283	0.06	0.03449	0.003	0	status=JK
YGR187C	HGH1		0.96855	0.051	0.95365	0.013	0.01483	0.051	4e-05
YGR188C	BUB1		0.61368	0.157	0.61505	0.106	-0.03478	0.157	0.00437
YGR189C	CRH1		1.05115	0.018	1.00426	0.01	0.05014	0.018	0.0001	status=JK
YGR192C	TDH3		0.87402	0.064	1.02251	0.02	-0.15154	0.064	0.00011
YGR193C	PDX1		0.94507	0.044	0.93525	0.063	0.02636	0.044	3e-05
YGR194C	XKS1		1.00368	0.064	0.99888	0.034	-0.00105	0.064	7e-05
YGR196C	FYV8		1.02386	0.021	1.05578	0.058	-0.01948	0.021	0
YGR197C	SNG1		1.10166	0.023	1.00821	0.048	0.0984	0.023	0.00014	status=JK
YGR199W	PMT6		1.07693	0.076	1.04955	0.077	0.04448	0.076	0.0001
YGR200C	ELP2		0.67533	0.066	0.79002	0.074	-0.10006	0.066	0.00026
YGR201C	YGR201C		1.0856	0.043	1.07902	0.031	0.01431	0.043	2e-05
YGR202C	PCT1		1.06397	0.024	1.03176	0.02	0.03624	0.024	0
YGR203W	YCH1		1.0347	0.07	1.00804	0.023	0.02786	0.07	8e-05
YGR205W	TDA10		1.0695	0.032	0.97232	0.048	0.0884	0.032	1e-05
YGR206W	MVB12		0.94284	0.123	0.95983	0.134	-0.04232	0.123	0.0006
YGR207C	CIR1		1.03345	0.052	0.97454	0.039	0.06597	0.052	3e-05
YGR208W	SER2		0.93131	0.092	0.90919	0.029	0.01779	0.092	0.00026
YGR209C	TRX2		0.98098	0.048	0.9966	0.047	-0.01216	0.048	3e-05
YGR210C	YGR210C		1.01095	0.041	0.93653	0.068	0.0905	0.041	2e-05
YGR212W	SLI1		1.03289	0.025	0.99427	0.089	0.04947	0.025	0
YGR213C	RTA1		1.07973	0.056	1.06036	0.014	0.01223	0.056	4e-05
YGR214W	RPS0A		0.88908	0.026	0.87254	0.037	0.02603	0.026	1e-05
YGR217W	CCH1		0.93143	0.104	0.98938	0.027	-0.04938	0.104	0.00038
YGR221C	TOS2		1.01347	0.035	0.98466	0.035	0.02403	0.035	1e-05
YGR223C	HSV2		0.87886	0.175	1.01685	0.046	-0.12998	0.175	0.00211
YGR224W	AZR1		1.06904	0.074	0.97516	0.093	0.10239	0.074	9e-05
YGR225W	AMA1		0.96263	0.057	1.03991	0.047	-0.08563	0.057	6e-05
YGR226C	YGR226C		1.07325	0.034	1.07582	0.051	0.00166	0.034	1e-05
YGR227W	DIE2		1.04846	0.054	1.03092	0.03	0.01728	0.053	4e-05
YGR228W	YGR228W		0.95873	0.051	1.00151	0.036	-0.03455	0.051	4e-05
YGR229C	SMI1		0.89217	0.012	0.99949	0.091	-0.12964	0.012	6e-05	status=JK
YGR230W	BNS1		1.14499	0.026	1.03161	0.004	0.11584	0.026	0
YGR231C	PHB2		0.84545	0.078	0.54069	0.051	0.30026	0.078	0.00021
YGR232W	NAS6		1.06214	0.034	1.00371	0.056	0.06025	0.034	1e-05
YGR233C	PHO81		0.99419	0.086	1.01741	0.083	-0.01632	0.086	0.00018
YGR234W	YHB1		1.09935	0.073	1.08413	0.013	0.01766	0.073	8e-05
YGR235C	MOS2		1.05084	0.038	1.06125	0.031	-0.00457	0.038	0.00044	status=JK
YGR236C	SPG1		1.02166	0.033	0.98194	0.056	0.04057	0.033	1e-05
YGR237C	YGR237C		1.004	0.13	0.9448	0.056	0.06056	0.13	0.00059
YGR238C	KEL2		1.01301	0.019	1.03468	0.037	-0.02725	0.019	0.00011	status=JK
YGR239C	PEX21		0.95655	0.057	0.93237	0.046	-0.00131	0.057	6e-05
YGR241C	YAP1802		1.06469	0.058	1.02123	0.022	0.04006	0.058	4e-05
YGR242W	YGR242W		1.03294	0.047	1.02978	0.039	0.00155	0.047	3e-05
YGR243W	FMP43		1.04593	0.004	1.02413	0.057	0.02656	0.004	0	status=JK
YGR244C	LSC2		1.11761	0.033	1.05454	0.108	0.06417	0.033	1e-05
YGR247W	CPD1		1.09106	0.026	1.02927	0.091	0.05175	0.026	0.00018	status=JK
YGR248W	SOL4		1.01696	0.048	1.02173	0.005	-0.00621	0.048	3e-05
YGR249W	MGA1		1.04437	0.076	0.97439	0.013	0.07679	0.076	0.00011
YGR250C	YGR250C		0.90589	0.07	0.90038	0.009	0.00669	0.07	0.00012
YGR254W	ENO1		1.02329	0.069	1.04307	0.115	-0.01053	0.069	8e-05
YGR255C	COQ6		1.03548	0.008	1.00785	0.005	0.03003	0.008	2e-05	status=JK
YGR256W	GND2		1.10082	0.243	1.08874	0.021	0.02314	0.243	0.00284
YGR259C	YGR259C		0.65188	0.017	0.68371	0.038	-0.0439	0.017	0
YGR260W	TNA1		0.81209	0.016	0.62234	0.07	0.17706	0.016	0.00012	status=JK
YGR261C	APL6		0.97816	0.023	1.0868	0.033	-0.10199	0.023	0
YGR263C	SAY1		1.11496	0.06	1.0448	0.033	0.06183	0.06	4e-05
YGR266W	YGR266W		1.00747	0.077	1.06699	0.079	-0.07783	0.077	0.00012
YGR268C	HUA1		1.1131	0.02	0.49628	0.579	0.66635	0.02	0.00011	status=JK
YGR269W	YGR269W		1.00951	0.021	0.85378	0.343	0.08229	0.021	0
YGR270W	YTA7		0.5832	0.038	0.21002	0.027	0.37435	0.038	8e-05
YGR271W	SLH1		0.98066	0.02	0.95158	0.216	-0.00279	0.02	0.00014	status=JK
YGR272C	YGR272C		0.98449	0.054	0.97988	0.062	0.00458	0.053	4e-05
YGR273C	YGR273C		1.00458	0.007	1.08257	0.028	-0.08071	0.007	1e-05	status=JK
YGR275W	RTT102		0.99742	0.029	0.9897	0.181	-0.04733	0.029	0.00028	status=JK
YGR276C	RNH70		1.01811	0.037	0.95345	0.066	0.07608	0.037	1e-05
YGR279C	SCW4		0.79546	0.131	0.90001	0.092	-0.08854	0.131	0.00119
YGR281W	YOR1		0.98019	0.071	0.90339	0.215	0.0566	0.071	0.00011
YGR282C	BGL2		1.07105	0.133	1.0287	0.162	0.03636	0.133	0.00053
YGR283C	YGR283C		0.96365	0.099	1.01321	0.123	-0.0489	0.099	0.0003
YGR284C	ERV29		1.03108	0.021	1.03071	0.039	-0.02091	0.021	0
YGR286C	BIO2		1.03099	0.032	0.98714	0.048	0.05636	0.032	0.00032	status=JK
YGR287C	IMA1		0.96709	0.079	0.96491	0.108	-0.01938	0.079	0.00015
YGR288W	MAL13		0.96803	0.065	0.99892	0.034	-0.03417	0.065	8e-05
YGR289C	MAL11		1.03311	0.021	1.03308	0.099	0.00814	0.021	0.00014	status=JK
YGR290W	YGR290W		1.07039	0.07	1.03987	0.063	0.02547	0.07	8e-05
YGR291C	YGR291C		1.08969	0.031	1.09066	0.023	-0.00595	0.031	1e-05
YGR292W	MAL12		1.02962	0.043	1.01693	0.029	0.01725	0.043	2e-05
YGR295C	COS6		0.96379	0.034	1.04197	0.017	-0.07582	0.034	1e-05
YHL002W	HSE1		1.07674	0.142	1.06221	0.13	0.03107	0.142	0.00062
YHL003C	LAG1		1.06578	0.097	1.04109	0.023	0.03063	0.097	0.00021
YHL005C	YHL005C		0.87897	0.051	0.97131	0.038	-0.1	0.051	5e-05
YHL006C	SHU1		1.00032	0.056	1.07322	0.04	-0.06962	0.056	5e-05
YHL007C	STE20		0.21045	0.153	0	0	0.21029	0.153	0.07081
YHL008C	YHL008C		1.0756	0.029	0.97341	0.143	0.078	0.029	0.00024	status=JK
YHL009C	YAP3		1.04479	0.034	1.02911	0.054	0.01576	0.034	1e-05
YHL010C	ETP1		1.03099	0.008	1.06426	0.017	-0.03772	0.008	0
YHL012W	YHL012W		1.04943	0.031	1.04453	0.029	-0.00013	0.031	1e-05
YHL013C	OTU2		1.04443	0.071	1.08786	0.107	-0.01264	0.071	9e-05
YHL014C	YLF2		1.06442	0.024	1.05876	0.054	0.00174	0.024	0.00017	status=JK
YHL016C	DUR3		0.98782	0.124	1.00904	0.086	-0.01028	0.124	0.00054
YHL017W	YHL017W		0.9875	0.034	0.99724	0.027	-0.01008	0.034	1e-05
YHL019C	APM2		1.04879	0.055	0.97794	0.035	0.06362	0.055	4e-05
YHL020C	OPI1		0.57946	0.09	0.54916	0.075	0.02941	0.09	0.00102
YHL021C	AIM17		0.99936	0.044	1.0625	0.133	-0.02485	0.044	2e-05
YHL022C	SPO11		1.00689	0.036	1.02976	0.054	-0.03602	0.036	1e-05
YHL023C	NPR3		0.74093	0.013	0.65016	0.046	0.08536	0.013	0
YHL024W	RIM4		1.01949	0.005	1.05501	0.037	-0.03491	0.005	1e-05	status=JK
YHL025W	SNF6		0.98802	0.013	1.04848	0.017	-0.06001	0.013	6e-05	status=JK
YHL026C	YHL026C		1.00093	0.033	1.00982	0.021	-0.01484	0.033	1e-05
YHL027W	RIM101		0.79352	0.034	0.80732	0.087	-0.00283	0.034	2e-05
YHL028W	WSC4		1.01607	0.056	1.00674	0.021	0.00999	0.056	5e-05
YHL029C	OCA5		0.94499	0.167	1.00474	0.028	-0.06198	0.167	0.00148
YHL030W	ECM29		0.94332	0.026	1.19009	0.139	-0.20335	0.026	0.00025	status=JK
YHL031C	GOS1		0.6484	0.089	0.68807	0.017	-0.03741	0.089	0.00069
YHL032C	GUT1		0.98491	0.035	1.06486	0.033	-0.07832	0.035	1e-05
YHL033C	RPL8A		0.77121	0.023	0.92373	0.099	-0.16699	0.023	1e-05
YHL034C	SBP1		0.99712	0.013	0.94817	0.146	0.02379	0.013	6e-05	status=JK
YHL035C	VMR1		1.06037	0.046	1.02185	0.069	0.03441	0.046	2e-05
YHL036W	MUP3		1.04768	0.051	1.06688	0.052	-0.02241	0.051	3e-05
YHL037C	YHL037C		1.03096	0.045	0.99071	0.053	0.04757	0.045	2e-05
YHL039W	EFM1		1.08115	0.137	0.97027	0.021	0.12063	0.137	0.00055
YHL040C	ARN1		1.01659	0.036	1.03682	0.075	-0.03056	0.036	1e-05
YHL041W	YHL041W		1.02354	0.022	1.00394	0.025	0.0258	0.022	0.00016	status=JK
YHL042W	YHL042W		1.01866	0.068	0.9848	0.015	0.0375	0.068	8e-05
YHL043W	ECM34		0.9664	0.046	1.02573	0.013	-0.06005	0.046	3e-05
YHL044W	YHL044W		0.99688	0.057	1.04278	0.115	-0.03752	0.057	5e-05
YHL045W	YHL045W		1.02437	0.092	1.05509	0.016	-0.03816	0.092	0.0002
YHL046C	PAU13		1.0577	0.036	1.00984	0.028	0.03711	0.036	0.0004	status=JK
YHL047C	ARN2		1.01686	0.019	1.06174	0.064	-0.02997	0.018	0
YHR001W-A	QCR10		1.00332	0.023	1.02351	0.039	-0.00742	0.023	0.00017	status=JK
YHR003C	YHR003C		0.9383	0.077	0.94251	0.089	-0.02608	0.077	0.00015
YHR004C	NEM1		0.86201	0.171	0.82333	0.091	0.0272	0.171	0.00209
YHR005C	GPA1		0	0	0	0	0	0	#NUM!
YHR006W	STP2		1.03359	0.041	1.00975	0.034	0.01416	0.041	2e-05
YHR008C	SOD2		0.93249	0.033	1.00333	0.042	-0.07399	0.033	1e-05
YHR009C	TDA3		0.95106	0.066	0.90685	0.093	0.03699	0.066	9e-05
YHR012W	VPS29		0.61297	0.067	0.8361	0.036	-0.22065	0.067	0.00036
YHR014W	SPO13		0.92226	0.022	0.84845	0.114	0.04761	0.022	0.00018	status=JK
YHR015W	MIP6		0.99294	0.044	1.01082	0.052	-0.01242	0.044	2e-05
YHR016C	YSC84		1.03462	0.036	1.02565	0.061	0.01922	0.036	1e-05
YHR017W	YSC83		0.97561	0.019	1.00798	0.091	-0.05427	0.019	0.00012	status=JK
YHR018C	ARG4		0.11609	0.012	0.14041	0.005	-0.02292	0.012	0.00028
YHR021C	RPS27B		0.45013	0.151	0.46982	0.062	-0.0097	0.151	0.00943
YHR021W-A	ECM12		1.06895	0.021	1.00508	0.036	0.06445	0.021	0.00013	status=JK
YHR022C	YHR022C		1.00122	0.049	0.877	0.223	0.07947	0.049	3e-05
YHR025W	THR1		0.4363	0.029	0.56778	0.083	-0.11931	0.029	8e-05
YHR028C	DAP2		1.00227	0.086	1.03319	0.034	-0.02623	0.086	0.00017
YHR029C	YHI9		0.99768	0.027	1.01287	0.009	-0.01642	0.027	1e-05
YHR030C	SLT2		0.75411	0.06	0.93406	0.017	-0.17526	0.06	0.00014
YHR031C	RRM3		1.13971	0.128	1.18377	0.076	-0.02838	0.128	0.00038
YHR032W	ERC1		1.1416	0.133	0.98419	0.086	0.16016	0.133	0.00043
YHR033W	YHR033W		1.03412	0.041	1.0471	0.066	-0.00246	0.041	2e-05
YHR034C	PIH1		0.88727	0.104	0.99499	0.053	-0.10206	0.104	0.00044
YHR035W	YHR035W		1.13013	0.016	0.98601	0.125	0.13218	0.016	7e-05	status=JK
YHR037W	PUT2		1.0858	0.041	0.91213	0.264	0.14182	0.041	0.00047	status=JK
YHR039C	MSC7		0.85325	0.083	0.87574	0.11	-0.00153	0.083	0.00026
YHR041C	SRB2		0.12295	0.041	0.12993	0.008	-0.00446	0.041	0.00948
YHR043C	DOG2		0.95843	0.028	1.09939	0.05	-0.11409	0.028	0.00028	status=JK
YHR044C	DOG1		0.8966	0.013	0.90372	0.272	-0.01926	0.013	7e-05	status=JK
YHR045W	YHR045W		0.98896	0.067	0.99286	0.147	-0.01143	0.067	9e-05
YHR046C	INM1		1.00685	0.028	0.99128	0.088	0.00589	0.028	0.00027	status=JK
YHR047C	AAP1		0.97782	0.027	1.02061	0.137	-0.02673	0.027	1e-05
YHR048W	YHK8		0.91202	0.015	0.90908	0.034	0.00711	0.015	9e-05	status=JK
YHR049C-A	YHR049C-A		0.97735	0.035	0.98778	0.033	-0.0092	0.035	1e-05
YHR049W	FSH1		1.02588	0.092	0.99676	0.024	0.02957	0.092	0.0002
YHR050W	SMF2		0.91288	0.02	0.82285	0.108	0.0845	0.02	0.00016	status=JK
YHR057C	CPR2		1.10261	0.14	0.99255	0.058	0.12347	0.14	0.00056
YHR059W	FYV4		0	0	0.10602	0.131	-0.07687	0	#NUM!
YHR061C	GIC1		0.58616	0.06	0.27363	0.036	0.30103	0.06	0.0035	status=JK
YHR066W	SSF1		0.90231	0.106	0.92885	0.044	-0.03396	0.106	0.00044
YHR067W	HTD2		0.57828	0.027	0.65476	0.076	-0.07307	0.027	3e-05
YHR073W	OSH3		1.0457	0.043	1.03886	0.058	0.01347	0.043	2e-05
YHR075C	PPE1		0.956	0.013	1.05015	0.044	-0.10692	0.013	6e-05	status=JK
YHR076W	PTC7		0.9822	0.017	1.00562	0.054	-0.01785	0.016	0
YHR077C	NMD2		0.93807	0.025	0.96882	0.026	-0.03251	0.025	0.00023	status=JK
YHR078W	YHR078W		1.07667	0.037	1.00055	0.022	0.0819	0.037	1e-05
YHR079C	IRE1		1.08244	0.046	0.99157	0.053	0.07863	0.046	2e-05
YHR079C-B	YHR079C-B		1.04075	0.041	1.05387	0.016	-0.01726	0.041	2e-05
YHR080C	YHR080C		1.01752	0.065	1.05954	0.057	-0.03484	0.065	7e-05
YHR081W	LRP1		0.44043	0.019	0.35258	0.03	0.08819	0.019	2e-05
YHR082C	KSP1		0.94304	0.042	1.03003	0.016	-0.08962	0.042	2e-05
YHR086W	NAM8		0.97551	0.017	0.9659	0.13	0.01652	0.017	0.00011	status=JK
YHR087W	RTC3		1.11666	0.034	1.03525	0.107	0.04558	0.034	1e-05
YHR092C	HXT4		1.05415	0.032	1.01878	0.054	0.04781	0.032	1e-05
YHR093W	YHR093W		1.0815	0.008	1.01345	0.027	0.06474	0.008	2e-05	status=JK
YHR094C	HXT1		1.05386	0.035	1.03987	0.06	0.00457	0.035	1e-05
YHR095W	YHR095W		1.06904	0.01	1.0065	0.081	0.06182	0.01	3e-05	status=JK
YHR096C	HXT5		0.97337	0.091	0.99504	0.101	0.00118	0.091	0.00023
YHR097C	YHR097C		0.95285	0.083	0.9563	0.062	-0.00718	0.083	0.00018
YHR103W	SBE22		0.97385	0.078	1.00194	0.042	-0.0231	0.078	0.00014
YHR104W	GRE3		1.03988	0.08	1.03527	0.046	0.00048	0.08	0.00013
YHR105W	YPT35		0.98722	0.056	0.97951	0.054	0.0082	0.056	5e-05
YHR106W	TRR2		1.05245	0.02	1.01971	0.073	0.04964	0.02	0.00012	status=JK
YHR108W	GGA2		0.91726	0.03	0.97587	0.04	-0.04947	0.03	0.00037	status=JK
YHR109W	CTM1		1.03526	0.018	0.99976	0.05	0.03648	0.018	0
YHR110W	ERP5		1.0574	0.03	1.07147	0.007	-0.01022	0.03	1e-05
YHR111W	UBA4		0.74971	0.039	0.77398	0.047	-0.01825	0.039	4e-05
YHR112C	YHR112C		1.00057	0.058	1.06141	0.027	-0.05633	0.058	5e-05
YHR113W	APE4		0.96291	0.085	1.04053	0.022	-0.06698	0.085	0.00019
YHR114W	BZZ1		1.12864	0.145	1.06704	0.111	0.06717	0.145	0.00058
YHR115C	DMA1		1.03703	0.027	1.04025	0.016	0.00161	0.027	0.00023	status=JK
YHR116W	COX23		0.66282	0.069	0.67685	0.079	-0.02091	0.069	0.00031
YHR117W	TOM71		0.96625	0.055	1.01623	0.041	-0.05681	0.055	5e-05
YHR121W	LSM12		1.02365	0.007	1.02558	0.023	-0.00074	0.007	1e-05	status=JK
YHR123W	EPT1		1.00133	0.046	0.91193	0.086	0.07553	0.046	3e-05
YHR124W	NDT80		1.02954	0.024	1.0216	0.05	0.00453	0.024	0
YHR125W	YHR125W		0.98117	0.009	1.03534	0.019	-0.04947	0.009	3e-05	status=JK
YHR126C	ANS1		1.041	0.06	1.02158	0.045	0.01598	0.06	5e-05
YHR127W	YHR127W		0.93051	0.01	0.98887	0.068	-0.05383	0.01	4e-05	status=JK
YHR129C	ARP1		0.90423	0.112	0.78733	0.202	0.17336	0.112	0.00052
YHR130C	YHR130C		1.04649	0.056	1.06523	0.106	0.00344	0.056	4e-05
YHR131C	YHR131C		0.98759	0.132	1.00529	0.024	-0.02331	0.132	0.00065
YHR132C	ECM14		0.93161	0.073	0.99689	0.037	-0.06385	0.073	0.00013
YHR132W-A	IGO2		1.0303	0.107	1.00974	0.023	0.02117	0.107	0.00031
YHR133C	NSG1		0.99853	0.063	0.99379	0.03	-0.00608	0.063	7e-05
YHR134W	WSS1		0.92976	0.034	0.90551	0.001	0.02496	0.034	1e-05
YHR135C	YCK1		0.95488	0.021	0.96811	0.004	-0.013	0.021	0
YHR136C	SPL2		1.0246	0.032	1.02776	0.056	-0.00938	0.032	1e-05
YHR137W	ARO9		0.99099	0.026	1.0792	0.023	-0.07564	0.026	0.00024	status=JK
YHR138C	YHR138C		1.10538	0.032	1.12394	0.014	-0.02449	0.032	0.00028	status=JK
YHR139C	SPS100		0.99432	0.061	0.96209	0.003	0.03446	0.061	6e-05
YHR139C-A	YHR139C-A		1.07289	0.092	1.042	0.037	0.03785	0.092	0.00017
YHR140W	YHR140W		1.06546	0.154	1.05143	0.035	0.02228	0.154	0.00082
YHR142W	CHS7		1.03127	0.028	0.95267	0.05	0.07642	0.028	0.00025	status=JK
YHR143W	DSE2		0.96361	0.077	0.97797	0.018	-0.01164	0.077	0.00014
YHR146W	CRP1		1.14937	0.01	1.06069	0.049	0.08246	0.01	2e-05	status=JK
YHR150W	PEX28		1.06135	0.033	1.03478	0.056	0.03718	0.033	0.00032	status=JK
YHR151C	MTC6		0.98881	0.01	1.02375	0.015	-0.04055	0.01	0
YHR152W	SPO12		1.03931	0.046	1.0324	0.031	0.00167	0.046	2e-05
YHR153C	SPO16		1.06078	0.002	0.64548	0.536	0.31439	0.002	0	status=JK
YHR154W	RTT107		0.94358	0.003	1.00838	0.119	-0.0868	0.003	0	status=JK
YHR155W	YSP1		1.03989	0.122	1.07623	0.165	-0.05638	0.122	0.00044
YHR156C	LIN1		0.97813	0.16	0.78835	0.079	0.17656	0.159	0.00117
YHR157W	REC104		0.99973	0.121	1.07046	0.058	-0.0903	0.121	0.00049
YHR158C	KEL1		0.91286	0.088	1.00475	0.066	-0.12863	0.088	0.00025
YHR159W	TDA11		0.98749	0.091	0.99035	0.051	-0.00116	0.091	0.00021
YHR160C	PEX18		1.03401	0.011	1.06183	0.016	-0.03156	0.011	4e-05	status=JK
YHR161C	YAP1801		1.02185	0.081	1.09623	0.18	-0.13145	0.081	0.00013
YHR162W	MPC2		0.88069	0.038	0.88671	0.004	-0.00473	0.038	2e-05
YHR163W	SOL3		0.9076	0.026	0.97059	0.069	-0.07871	0.026	1e-05
YHR167W	THP2		1.00853	0.054	0.99441	0.032	0.00556	0.054	4e-05
YHR171W	ATG7		0.97365	0.087	0.98805	0.042	-0.00665	0.087	0.00019
YHR176W	FMO1		1.08289	0.031	1.06953	0.079	0.01118	0.031	1e-05
YHR178W	STB5		0.60445	0.09	0.51374	0.094	0.10065	0.09	0.0009
YHR179W	OYE2		1.09452	0.055	1.07633	0.068	0.03707	0.055	3e-05
YHR180W	YHR180W		1.15149	0.136	1.10938	0.068	0.04415	0.136	0.00045
YHR181W	SVP26		1.09709	0.044	1.13407	0.089	-0.02714	0.044	0.00053	status=JK
YHR182W	YHR182W		1.14721	0.032	1.07151	0.108	0.06135	0.032	0.00026	status=JK
YHR184W	SSP1		1.04835	0.026	1.06382	0.047	-0.01589	0.026	0.0002	status=JK
YHR185C	PFS1		1.06169	0.062	1.02934	0.017	0.0351	0.062	5e-05
YHR189W	PTH1		0.88361	0.061	0.81309	0.064	0.05551	0.061	9e-05
YHR191C	CTF8		0.90546	0.016	0.91677	0.084	-0.00188	0.016	0.0001	status=JK
YHR193C	EGD2		0	0	0	0	0	0	#NUM!
YHR194W	MDM31		0.10428	0.093	0.1784	0.036	-0.05435	0.093	0.11025
YHR195W	NVJ1		1.11912	0.069	1.00582	0.021	0.11481	0.069	6e-05
YHR198C	AIM18		0.74707	0.051	0.87428	0.011	-0.12134	0.051	9e-05
YHR199C	AIM46		1.01391	0.061	1.00978	0.031	-0.00205	0.061	6e-05
YHR200W	RPN10		0.85255	0.08	0.84853	0.07	0.0222	0.08	0.00022
YHR202W	YHR202W		1.00301	0.011	0.93229	0.058	0.07481	0.011	4e-05	status=JK
YHR203C	RPS4B		0.72646	0.009	0.77156	0.152	-0.0505	0.009	5e-05	status=JK
YHR204W	MNL1		0.97933	0.046	1.06444	0.048	-0.07297	0.046	3e-05
YHR206W	SKN7		0.9858	0.005	0.98128	0.015	0.00533	0.005	1e-05	status=JK
YHR207C	SET5		1.03	0.008	1.02542	0.023	-0.00027	0.008	2e-05	status=JK
YHR209W	CRG1		0.99637	0.05	1.02643	0.032	-0.02633	0.05	3e-05
YHR210C	YHR210C		1.03321	0.06	1.06293	0.015	-0.02238	0.06	5e-05
YIL001W	YIL001W		0.96144	0.027	1.03013	0.008	-0.07121	0.027	1e-05
YIL002C	INP51		0.92646	0.032	0.98587	0	-0.05875	0.032	1e-05
YIL005W	EPS1		1.05151	0.047	0.99805	0.048	0.04484	0.047	3e-05
YIL006W	YIA6		0.91135	0.01	0.96584	0.037	-0.05722	0.01	4e-05	status=JK
YIL007C	NAS2		0.98169	0.03	0.98568	0.058	-0.00363	0.03	1e-05
YIL008W	URM1		0.71508	0.064	0.71852	0.05	-0.00147	0.064	0.0002
YIL009C-A	EST3		0.99881	0.1	0.98772	0.063	0.02694	0.1	0.00028
YIL010W	DOT5		1.0242	0.057	1.01097	0.014	0.01595	0.057	5e-05
YIL011W	TIR3		0	0	0.10599	0.184	0	0	#NUM!	status=JK
YIL012W	YIL012W		1.07474	0.068	1.02053	0.049	0.03968	0.068	0.00135	status=JK
YIL013C	PDR11		0.99627	0.082	0.96992	0.085	0.03895	0.082	0.00015
YIL014W	MNT3		1.00638	0.005	1.00172	0.033	-0.00111	0.005	1e-05	status=JK
YIL015C-A	YIL015C-A		0.90888	0.134	1.00791	0.006	-0.09797	0.134	0.00087
YIL015W	BAR1		1.02056	0.014	0.99585	0.039	0.03165	0.014	6e-05	status=JK
YIL016W	SNL1		1.05091	0.069	0.99351	0.035	0.06668	0.069	8e-05
YIL017C	VID28		1.02287	0.09	1.10264	0.036	-0.06737	0.09	0.00019
YIL020C	HIS6		0.12245	0.016	0.12556	0.014	-0.00495	0.016	0.00061
YIL023C	YKE4		1.05255	0.022	1.03452	0.028	0.01859	0.022	0
YIL024C	YIL024C		1.03273	0.014	1.04646	0.017	-0.01691	0.014	6e-05	status=JK
YIL025C	YIL025C		1.02134	0.04	0.98894	0.032	0.02858	0.04	2e-05
YIL027C	EMC5		0.94505	0.087	1.00793	0.081	-0.04393	0.087	0.00021
YIL028W	YIL028W		0.94403	0.068	0.96568	0.011	-0.02102	0.068	0.0001
YIL029C	YIL029C		0.99571	0.105	1.08421	0.031	-0.08967	0.105	0.00032
YIL030C	SSM4		1.0246	0.064	0.94348	0.029	0.0825	0.064	7e-05
YIL032C	YIL032C		1.04088	0.084	0.98967	0.069	0.06484	0.084	0.00014
YIL034C	CAP2		0.9867	0.023	1.01568	0.034	-0.03313	0.023	0
YIL035C	CKA1		0.97972	0.066	1.06306	0.069	-0.08677	0.066	8e-05
YIL036W	CST6		1.01449	0.03	0.92886	0.048	0.08073	0.03	1e-05
YIL037C	PRM2		0.95568	0.012	1.01706	0.024	-0.06349	0.012	5e-05	status=JK
YIL038C	NOT3		1.01033	0.051	1.01416	0.058	-0.01527	0.051	3e-05
YIL039W	TED1		1.03288	0.054	1.02098	0.036	0.00493	0.054	4e-05
YIL040W	APQ12		0.28228	0.048	0.32764	0.028	-0.032	0.048	0.00133
YIL041W	GVP36		0.99452	0.107	1.05887	0.078	-0.07875	0.107	0.00034
YIL042C	PKP1		0.99278	0.058	1.09174	0.055	-0.08544	0.058	6e-05
YIL043C	CBR1		1.10325	0.113	0.99237	0.04	0.0932	0.112	0.00029
YIL044C	AGE2		0.82704	0.077	0.93012	0.016	-0.10346	0.077	0.00022
YIL045W	PIG2		1.07234	0.05	1.00693	0.036	0.05887	0.05	3e-05
YIL047C	SYG1		1.01947	0.042	0.94651	0.11	0.08139	0.042	2e-05
YIL049W	DFG10		1.02458	0.034	0.98981	0.065	0.01775	0.034	1e-05
YIL050W	PCL7		1.08538	0.121	1.03988	0.036	0.06548	0.121	0.00038
YIL052C	RPL34B		0.98918	0.021	0.96523	0.019	0.0241	0.021	0
YIL053W	RHR2		0.87766	0.055	1.00198	0.065	-0.13672	0.055	7e-05
YIL054W	YIL054W		1.00535	0.046	1.02201	0.066	-0.01461	0.046	3e-05
YIL055C	YIL055C		0.91451	0.121	0.75489	0.215	0.2155	0.121	0.00063
YIL056W	VHR1		0.9177	0.083	0.87447	0.048	0.03265	0.083	0.0002
YIL057C	RGI2		1.04834	0.142	0.92437	0.165	0.11491	0.142	0.00068
YIL058W	YIL058W		1.01828	0.07	1.06932	0.035	-0.06395	0.07	9e-05
YIL059C	YIL059C		1.09656	0.073	0.94371	0.009	0.15523	0.073	8e-05
YIL060W	YIL060W		1.02541	0.069	0.95987	0.134	0.07358	0.069	8e-05
YIL064W	SEE1		1.03478	0.005	1.04243	0.199	-0.02739	0.005	1e-05	status=JK
YIL065C	FIS1		0.90735	0.052	0.97263	0.051	-0.07379	0.052	5e-05
YIL066C	RNR3		1.03562	0.028	1.03579	0.035	-0.00875	0.028	1e-05
YIL067C	YIL067C		0.99499	0.032	0.99948	0.006	-0.00249	0.032	1e-05
YIL070C	MAM33		0.99174	0.045	0.97812	0.006	0.01213	0.045	3e-05
YIL071C	PCI8		0.90288	0.058	0.93342	0.01	-0.03018	0.058	7e-05
YIL072W	HOP1		0.96157	0.073	1.02722	0.027	-0.05776	0.073	0.00012
YIL073C	SPO22		1.00654	0.039	0.97863	0.023	0.04052	0.039	2e-05
YIL074C	SER33		1.02348	0.06	1.02786	0.053	0.01193	0.06	6e-05
YIL076W	SEC28		0.56417	0.117	0.73174	0.011	-0.16351	0.117	0.00234
YIL077C	YIL077C		0.90941	0.014	0.96538	0.093	-0.04796	0.014	0
YIL079C	AIR1		1.04146	0.033	1.05131	0.068	0.00067	0.033	1e-05
YIL084C	SDS3		0.48174	0.061	0.47295	0.047	0.01422	0.061	0.00056
YIL085C	KTR7		0.92898	0.028	0.96218	0.085	-0.04187	0.028	1e-05
YIL086C	YIL086C		0.97914	0.008	0.99435	0.048	-0.01459	0.008	0
YIL087C	AIM19		1.01228	0.028	1.01005	0.035	0.01055	0.028	1e-05
YIL088C	AVT7		1.05266	0.039	1.03276	0.025	0.02429	0.039	1e-05
YIL089W	YIL089W		1.03963	0.022	1.02287	0.02	0.02702	0.022	0.00015	status=JK
YIL090W	ICE2		0.33898	0.022	0.52975	0.03	-0.19759	0.022	8e-05
YIL092W	YIL092W		0.93472	0.011	0.95588	0.021	-0.0301	0.011	5e-05	status=JK
YIL093C	RSM25		0.97441	0.066	1.02264	0.053	-0.05367	0.066	9e-05
YIL094C	LYS12		0.25932	0.03	0.16418	0.009	0.09126	0.03	0.00044
YIL095W	PRK1		1.00019	0.021	1.05875	0.007	-0.05677	0.021	0
YIL096C	YIL096C		1.01901	0.043	1.03193	0.098	0.00621	0.043	2e-05
YIL097W	FYV10		0.95464	0.014	0.97574	0.08	-0.0335	0.014	7e-05	status=JK
YIL098C	FMC1		0.98835	0.016	1.01208	0.038	-0.03145	0.016	0
YIL099W	SGA1		1.01979	0.027	1.02673	0.026	-0.00488	0.027	0
YIL100W	YIL100W		0.99616	0.015	1.05457	0.026	-0.06649	0.015	7e-05	status=JK
YIL101C	XBP1		1.00425	0.026	1.08819	0.015	-0.08903	0.026	0
YIL102C	YIL102C		1.00852	0.03	1.04494	0.008	-0.03439	0.03	1e-05
YIL103W	DPH1		1.00127	0.011	0.9853	0.039	0.01256	0.011	4e-05	status=JK
YIL105C	SLM1		1.00728	0.055	1.02035	0.009	-0.01597	0.054	4e-05
YIL107C	PFK26		0.99983	0.018	0.97943	0.044	0.01931	0.018	0.00011	status=JK
YIL108W	YIL108W		0.99469	0.055	1.00445	0.007	-0.00885	0.055	5e-05
YIL110W	HPM1		0.72043	0.018	0.92048	0.03	-0.18815	0.018	0
YIL111W	COX5B		1.0657	0.013	0.99737	0.02	0.06992	0.013	5e-05	status=JK
YIL112W	HOS4		0.95695	0.017	0.96739	0.129	-0.00093	0.017	0.00011	status=JK
YIL113W	SDP1		0.96228	0.01	0.97019	0.029	-0.00295	0.01	0
YIL114C	POR2		1.01748	0.015	0.99339	0.067	0.0208	0.015	0
YIL116W	HIS5		0.14346	0.008	0.15869	0.024	-0.023	0.008	0.00101	status=JK
YIL117C	PRM5		1.01375	0.037	1.01625	0.022	-0.00871	0.037	1e-05
YIL119C	RPI1		1.01791	0.038	0.99085	0.042	0.02356	0.038	1e-05
YIL120W	QDR1		0.96593	0.111	1.01255	0.013	-0.04681	0.111	0.00042
YIL122W	POG1		0.9945	0.024	0.98862	0.03	0.01367	0.024	0
YIL123W	SIM1		1.04664	0.055	0.97554	0.061	0.06265	0.055	4e-05
YIL124W	AYR1		1.04518	0.014	1.01881	0.077	0.00788	0.014	6e-05	status=JK
YIL125W	KGD1		0	0	0.00115	0.002	0	0	#NUM!
YIL128W	MET18		0.57802	0.036	0.68205	0.024	-0.10046	0.036	7e-05
YIL130W	ASG1		0.9664	0.057	0.97417	0.022	-0.0162	0.057	6e-05
YIL131C	FKH1		1.02422	0.053	1.05189	0.034	-0.03153	0.053	4e-05
YIL132C	CSM2		0.95035	0.012	0.9808	0.095	-0.04437	0.012	5e-05	status=JK
YIL133C	RPL16A		0.92527	0.046	0.92848	0.052	-0.03022	0.046	3e-05
YIL134W	FLX1		0.67518	0.11	0.41692	0.014	0.25247	0.11	0.00117
YIL135C	VHS2		1.07068	0.026	1.05279	0.025	0.02635	0.026	0
YIL136W	OM45		1.05048	0.002	1.01824	0.007	0.02941	0.002	0	status=JK
YIL137C	TMA108		0.98246	0.015	0.91676	0.108	0.08558	0.015	0
YIL138C	TPM2		1.03782	0.053	1.01098	0.008	0.03117	0.053	4e-05
YIL139C	REV7		1.04258	0.026	0.9634	0.06	0.06996	0.026	0
YIL140W	AXL2		1.08924	0.058	1.10119	0.04	-0.01029	0.058	4e-05
YIL141W	YIL141W		1.14541	0.005	1.09033	0.033	0.04628	0.005	1e-05	status=JK
YIL145C	PAN6		0.91045	0.039	1.01914	0.076	-0.10624	0.039	0.0006	status=JK
YIL146C	ATG32		0.98143	0.01	1.01624	0.072	-0.03041	0.01	3e-05	status=JK
YIL148W	RPL40A		1.01274	0.027	0.98963	0.075	0.04019	0.027	1e-05
YIL149C	MLP2		1.02338	0.033	1.0069	0.012	0.01735	0.033	1e-05
YIL151C	YIL151C		0.97273	0.004	0.94741	0.035	0.02226	0.004	0	status=JK
YIL152W	YIL152W		1.02701	0.032	1.04406	0.038	-0.01803	0.032	1e-05
YIL153W	RRD1		1.06458	0.007	1.06559	0.025	-0.00257	0.007	1e-05	status=JK
YIL154C	IMP2'		1.00784	0.021	1.06976	0.016	-0.05976	0.021	0.00014	status=JK
YIL155C	GUT2		0.97832	0.026	0.94197	0.068	0.02823	0.026	1e-05
YIL156W	UBP7		1.02813	0.022	1.10818	0.036	-0.08496	0.022	0
YIL157C	COA1		0.96466	0.028	1.01	0.021	-0.0342	0.028	1e-05
YIL158W	AIM20		1.00452	0.011	1.02498	0.079	-0.02388	0.011	4e-05	status=JK
YIL159W	BNR1		1.02202	0.065	0.9492	0.174	0.03755	0.065	7e-05
[truncated: 2,323 more rows]

## Sheet: DMA LU Rep2
Array ORF	Array Name	Array annotation	Normalized colony size (EXPERIMENT)	Normalized colony std. dev. (EXPERIMENT)	Normalized colony size (CONTROL)	Normalized colony std. dev. (CONTROL)	Score	Score stdev	p-Value	Additional information
YAL002W	VPS8		0.87795	0.174	1.0793	0.046	-0.20148	0.174	0.00208
YAL004W	YAL004W		0.8855	0.069	1.02718	0.099	-0.15541	0.069	0.00013
YAL005C	SSA1		0.93784	0.097	0.99415	0.034	-0.05696	0.097	0.0003
YAL007C	ERP2		0.95707	0.109	0.98744	0.057	-0.02181	0.108	0.0004
YAL008W	FUN14		1.12273	0.094	1.06581	0.069	0.06314	0.094	0.00016
YAL010C	MDM10		0.83679	0.071	0.79906	0.075	0.03946	0.071	0.00017
YAL011W	SWC3		1.08555	0.056	1.03871	0.048	0.05478	0.056	4e-05
YAL013W	DEP1		0.72732	0.024	0.78795	0.063	-0.07359	0.024	0.00037	status=JK
YAL014C	SYN8		1.13179	0.113	1.13755	0.045	-0.01748	0.113	0.00027
YAL015C	NTG1		1.10394	0.059	1.00057	0.042	0.12088	0.059	4e-05
YAL017W	PSK1		0.99678	0.023	1.01715	0.004	-0.01978	0.023	0.00018	status=JK
YAL018C	YAL018C		1.03267	0.051	0.96513	0.046	0.06118	0.051	3e-05
YAL019W	FUN30		0.90245	0.116	1.02349	0.009	-0.12155	0.116	0.00057
YAL020C	ATS1		1.00665	0.021	0.93846	0.011	0.07212	0.021	0.00015	status=JK
YAL022C	FUN26		1.04396	0.063	1.03757	0.059	-0.00266	0.063	6e-05
YAL023C	PMT2		0.95522	0.085	1.05587	0.031	-0.09959	0.085	0.00019
YAL024C	LTE1		0.44154	0.033	0.85136	0.032	-0.40786	0.033	0.00191	status=JK
YAL026C	DRS2		0.66337	0.014	0.6234	0.036	0.03039	0.014	0.00015	status=JK
YAL027W	SAW1		0.94198	0.149	1.03582	0.118	-0.09333	0.149	0.00107
YAL028W	FRT2		1.03837	0.047	1.01323	0.109	-0.01055	0.047	3e-05
YAL029C	MYO4		0.98344	0.035	0.95316	0.034	0.03657	0.035	1e-05
YAL030W	SNC1		1.00648	0.065	1.06274	0.052	-0.05298	0.065	7e-05
YAL031C	GIP4		1.05079	0.041	1.03556	0.051	0.02792	0.041	2e-05
YAL034C	FUN19		1.06627	0.09	1.03882	0.013	0.01877	0.09	0.00016
YAL036C	RBG1		0.95853	0.064	0.92365	0.03	0.02697	0.064	8e-05
YAL037W	YAL037W		1.03246	0.027	0.96533	0.023	0.06644	0.027	0
YAL040C	CLN3		0.97873	0.029	1.00404	0.045	-0.03817	0.029	0.00029	status=JK
YAL042W	ERV46		1.07584	0.054	1.06179	0.021	0.02471	0.054	0.00085	status=JK
YAL043C-A	YAL043C-A		0.92721	0.138	1.20829	0.095	-0.26851	0.138	0.0009
YAL045C	YAL045C		1.08817	0.02	0.95608	0.09	0.11897	0.02	0.00011	status=JK
YAL046C	AIM1		0.98816	0.014	0.99411	0.012	-0.00198	0.014	0
YAL048C	GEM1		0.9969	0.01	0.886	0.169	0.07054	0.01	0
YAL049C	AIM2		0.85222	0.023	0.98705	0.039	-0.13131	0.023	0.00024	status=JK
YAL051W	OAF1		0.96904	0.075	0.96851	0.037	-0.00068	0.075	0.00013
YAL053W	FLC2		1.00358	0.083	1.07133	0.02	-0.06445	0.083	0.00015
YAL054C	ACS1		1.08153	0.019	1.15412	0.039	-0.07023	0.019	0.00011	status=JK
YAL055W	PEX22		0.97241	0.142	0.93151	0.052	0.0459	0.142	0.00084
YAL056W	GPB2		0.89157	0.161	0.8166	0.019	0.0809	0.161	0.00159
YAL058C-A	YAL058C-A		1.03801	0.008	1.06826	0.053	-0.0468	0.008	2e-05	status=JK
YAL058W	CNE1		1.06264	0.024	1.13254	0.059	-0.05616	0.024	0
YAL059W	ECM1		0.93969	0.032	0.92166	0.063	0.02043	0.032	1e-05
YAL060W	BDH1		1.01888	0.101	0.93763	0.097	0.08719	0.101	0.00027
YAL061W	BDH2		0.98232	0.135	1.13128	0.119	-0.17958	0.135	0.00071
YAL062W	GDH3		1.07537	0.048	1.02854	0.039	0.04379	0.048	3e-05
YAL064C-A	TDA8		1.01285	0.112	1.01304	0.091	-0.00575	0.112	0.00037
YAL065C	YAL065C		1.02175	0.069	1.06472	0.08	-0.04904	0.069	8e-05
YAL066W	YAL066W		1.00038	0.086	1.11079	0.031	-0.11261	0.086	0.00018
YAL067C	SEO1		0.93379	0.07	0.96872	0.016	-0.03516	0.07	0.00186	status=JK
YAL068C	PAU8		1.12494	0.023	1.0679	0.012	0.05221	0.023	0.00014	status=JK
YAR002C-A	ERP1		1.07844	0.052	1.07687	0.035	0.00538	0.052	3e-05
YAR002W	NUP60		1.03982	0.105	1.0324	0.028	-0.00084	0.105	0.00028
YAR003W	SWD1		0.8291	0.095	0.88317	0.064	-0.0466	0.095	0.0004
YAR014C	BUD14		0.70531	0.183	0.79946	0.112	-0.05679	0.183	0.00455
YAR015W	ADE1		0.97878	0.065	1.06389	0.034	-0.08573	0.065	8e-05
YAR018C	KIN3		0.28261	0.283	0.97057	0.117	-0.71646	0.282	0.13932
YAR020C	PAU7		0.93663	0.154	0.92169	0.1	0.02397	0.154	0.0012
YAR023C	YAR023C		1.06584	0.114	1.00229	0.042	0.06273	0.114	0.00033
YAR027W	UIP3		0.91392	0.046	1.01455	0.039	-0.09995	0.046	4e-05
[truncated: 4,264 more rows]

## Sheet: TSv6 U Rep1
Array ORF	Array Name	Array annotation	Normalized colony size (EXPERIMENT)	Normalized colony std. dev. (EXPERIMENT)	Normalized colony size (CONTROL)	Normalized colony std. dev. (CONTROL)	Score	Score stdev	p-Value	Additional information
[truncated: 1,227 more rows]

[truncated: 3 more sheets: TSv6 U Rep2, TSv6 LU Rep1, TSv6 LU Rep2]
