# Supplementary material for: Genetic profiling of protein burden and nuclear export overload
Source: eLife journal article supplement (doi:10.7554/elife.54080), 2020-11-04
Supplement: supp [file elife-54080-supp-v1.zip › elife_poa_e54080_Figure_5_source_data_2.xlsx]

## Sheet: DMA U Rep1
Array ORF	Array Name	Array annotation	Normalized colony size (EXPERIMENT)	Normalized colony std. dev. (EXPERIMENT)	Normalized colony size (CONTROL)	Normalized colony std. dev. (CONTROL)	Score	Score stdev	p-Value	Additional information
YAL002W	VPS8		0.93754	0.023	0.85791	0.204	0.07372	0.023	0.0002	status=JK
YAL004W	YAL004W		1.07772	0.011	1.04076	0.029	0.04142	0.011	3e-05	status=JK
YAL005C	SSA1		0.9002	0.124	0.93947	0.064	-0.02894	0.124	0.00071
YAL007C	ERP2		1.01756	0.093	1.08415	0.038	-0.05807	0.093	0.00021
YAL008W	FUN14		1.25754	0.049	1.17399	0.046	0.08217	0.048	0.0005	status=JK
YAL010C	MDM10		0.72894	0.091	0.8357	0.012	-0.10154	0.091	0.00054
YAL011W	SWC3		0.89725	0.05	0.91146	0.043	-0.01793	0.049	5e-05
YAL013W	DEP1		0.83599	0.044	0.81129	0.054	0.03597	0.044	4e-05
YAL014C	SYN8		0.98155	0.1	1.0351	0.084	-0.05336	0.1	0.00029
YAL015C	NTG1		1.01208	0.12	1.00493	0.05	-0.00932	0.119	0.00045
YAL017W	PSK1		1.00873	0.022	1.08788	0.015	-0.07787	0.022	0
YAL018C	YAL018C		1.03765	0.042	0.9817	0.049	0.04746	0.042	0.00054	status=JK
YAL019W	FUN30		0.85635	0.088	0.92567	0.018	-0.07032	0.088	0.00029
YAL020C	ATS1		1.00441	0.01	1.06093	0.016	-0.06663	0.01	3e-05	status=JK
YAL022C	FUN26		0.96493	0.042	0.96009	0.039	0.0067	0.041	2e-05
YAL023C	PMT2		1.14978	0.021	1.08739	0.047	0.05414	0.021	0.00011	status=JK
YAL024C	LTE1		0.94902	0.078	0.8918	0.128	0.0143	0.078	0.00015
YAL026C	DRS2		0.68617	0.095	0.63636	0.072	0.05786	0.095	0.00072
YAL027W	SAW1		0.9779	0.061	0.99956	0.036	-0.01797	0.061	7e-05
YAL028W	FRT2		0.97378	0.101	0.95725	0.076	-0.0029	0.101	0.00031
YAL029C	MYO4		1.12038	0.026	1.03924	0.076	0.07051	0.026	0.00018	status=JK
YAL030W	SNC1		1.01042	0.024	0.95301	0.021	0.05649	0.024	0.00019	status=JK
YAL031C	GIP4		1.01647	0.08	1.01634	0.012	0.00563	0.08	0.00014
YAL034C	FUN19		1.0419	0.058	0.95769	0.152	0.10331	0.057	5e-05
YAL036C	RBG1		1.04068	0.053	1.06017	0.046	-0.01025	0.053	4e-05
YAL037W	YAL037W		1.05469	0.122	1.03853	0.133	-0.00049	0.122	0.00042
YAL040C	CLN3		0.91767	0.05	0.92343	0.031	-0.00632	0.05	4e-05
YAL042W	ERV46		1.04398	0.072	1.06483	0.023	-0.03142	0.071	0.00156	status=JK
YAL043C-A	YAL043C-A		0.92873	0.106	0.99397	0.049	-0.05472	0.106	0.00041
YAL045C	YAL045C		1.01425	0.027	0.96661	0.117	0.02377	0.026	0.00023	status=JK
YAL046C	AIM1		1.03592	0.011	1.04238	0.015	-0.00203	0.011	0
YAL048C	GEM1		0.91499	0.018	0.89979	0.037	0.01061	0.018	0.00013	status=JK
YAL049C	AIM2		0.93162	0.109	0.94769	0.104	-0.0434	0.109	0.00044
YAL051W	OAF1		0.89236	0.095	0.88714	0.026	0.00815	0.095	0.00033
YAL053W	FLC2		1.04504	0.009	1.06991	0.011	-0.03156	0.009	3e-05	status=JK
YAL054C	ACS1		1.06919	0.028	1.04726	0.075	0.033	0.028	1e-05
YAL055W	PEX22		0.92198	0.02	0.92501	0.145	-0.03438	0.02	0.00016	status=JK
YAL056W	GPB2		0.93169	0.054	0.9634	0.015	-0.02427	0.054	5e-05
YAL058C-A	YAL058C-A		1.03157	0.017	0.98655	0.009	0.0414	0.017	9e-05	status=JK
YAL058W	CNE1		0.9319	0.067	0.98236	0.08	-0.05647	0.066	0.0001
YAL059W	ECM1		0.88914	0.052	0.9986	0.085	-0.1008	0.052	5e-05
YAL060W	BDH1		1.09517	0.019	1.03103	0.05	0.06426	0.019	0.0001	status=JK
YAL061W	BDH2		1.0811	0.061	1.05297	0.09	0.02699	0.061	0.00106	status=JK
YAL062W	GDH3		1.17741	0.056	1.09271	0.185	0.08871	0.056	3e-05
YAL064C-A	TDA8		1.06808	0.08	1.17628	0.048	-0.12259	0.08	0.00012
YAL065C	YAL065C		1.11271	0.107	1.09393	0.058	0.01752	0.107	0.00024
YAL066W	YAL066W		0.97856	0.022	0.97061	0.068	-1e-05	0.022	0.00017	status=JK
YAL067C	SEO1		0.95316	0.102	0.98043	0.058	-0.01574	0.102	0.00033
YAL068C	PAU8		1.07378	0.049	1.10281	0.102	-0.0204	0.049	3e-05
YAR002C-A	ERP1		1.11534	0.029	1.08617	0.006	0.02721	0.029	0.00022	status=JK
YAR002W	NUP60		1.08746	0.029	0.96813	0.073	0.10227	0.029	0.00024	status=JK
YAR003W	SWD1		0.90648	0.039	0.89999	0.037	0.00478	0.039	2e-05
YAR014C	BUD14		0.79831	0.062	0.91526	0.013	-0.11376	0.062	0.00013
YAR015W	ADE1		0.90592	0.114	1.002	0.046	-0.09283	0.114	0.00054
YAR018C	KIN3		0.72295	0.052	0.80024	0.117	-0.09977	0.052	0.0001
YAR020C	PAU7		0.92754	0.041	0.9557	0.101	-0.00586	0.041	0.00065	status=JK
YAR023C	YAR023C		1.07836	0.046	1.14194	0.102	-0.05938	0.046	2e-05
YAR027W	UIP3		0.89305	0.137	1.00804	0.115	-0.11713	0.137	0.00097
YAR028W	YAR028W		0.92186	0.137	0.94948	0.091	-0.04426	0.137	0.0009
YAR029W	YAR029W		0.96453	0.086	0.92124	0.012	0.04633	0.086	0.00019
YAR030C	YAR030C		1.02744	0.047	0.99377	0.086	0.02501	0.047	3e-05
YAR031W	PRM9		0.99378	0.007	1.01119	0.025	-0.01003	0.007	2e-05	status=JK
YAR035W	YAT1		1.05514	0.015	1.02569	0.034	0.01727	0.014	6e-05	status=JK
YAR037W	YAR037W		1.12314	0.03	1.13816	0.05	-0.02987	0.029	1e-05
YAR040C	YAR040C		1.03829	0.086	1.05909	0.08	-0.02879	0.085	0.00015
YAR042W	SWH1		1.04266	0.04	1.02989	0.03	0.01386	0.04	2e-05
YAR043C	YAR043C		1.03491	0.146	0.99086	0.112	0.02632	0.146	0.00076
YAR044W	YAR044W		0.8837	0.197	1.10051	0.027	-0.20578	0.197	0.00293
YAR047C	YAR047C		0.9759	0.057	0.89744	0.009	0.08179	0.057	6e-05
YAR050W	FLO1		1.02437	0.044	1.0769	0.044	-0.04184	0.043	2e-05
YBL001C	ECM15		1.09182	0.082	1.16935	0.049	-0.08057	0.081	0.00011
YBL003C	HTA2		1.06649	0.019	0.982	0.229	0.03302	0.019	0.00011	status=JK
YBL005W	PDR3		1.02511	0.056	1.00835	0.157	-0.0236	0.056	4e-05
YBL007C	SLA1		0.82761	0.015	0.83682	0.108	-0.01754	0.015	0.00011	status=JK
YBL008W	HIR1		1.05652	0.024	0.82326	0.195	0.2311	0.024	0.00017	status=JK
YBL009W	ALK2		1.06221	0.059	0.92083	0.082	0.15052	0.059	5e-05
YBL010C	YBL010C		0.95269	0.206	1.0076	0.027	-0.05802	0.206	0.00269
YBL011W	SCT1		0.73895	0.123	0.70788	0.188	0.03813	0.122	0.00123
YBL013W	FMT1		0.98883	0.193	0.84278	0.157	0.1836	0.192	0.00197
YBL015W	ACH1		0.97858	0.083	1.04979	0.076	-0.0608	0.082	0.00016
YBL016W	FUS3		0.78267	0.089	1.01189	0.024	-0.22023	0.089	0.0004
YBL017C	PEP1		1.09775	0.009	1.00427	0.032	0.07642	0.009	2e-05	status=JK
YBL019W	APN2		1.0862	0.02	1.04007	0.086	0.04544	0.02	0.00012	status=JK
YBL021C	HAP3		0.9339	0.055	0.92033	0.041	-0.00024	0.055	6e-05
YBL024W	NCL1		1.14921	0.062	1.06717	0.084	0.07077	0.062	4e-05
YBL025W	RRN10		0.86332	0.015	0.80644	0.034	0.06441	0.015	0.00011	status=JK
YBL027W	RPL19B		0.54444	0.213	0.43584	0.154	0.08522	0.213	0.01448
YBL028C	YBL028C		1.14454	0.126	1.07304	0.04	0.07566	0.126	0.00036
YBL029W	YBL029W		1.21562	0.085	1.14014	0.076	0.05551	0.085	9e-05
YBL031W	SHE1		0.12864	0.014	0.46818	0.33	-0.42081	0.014	0.00371	status=JK
YBL032W	HEK2		1.05738	0.004	1.08507	0.031	-0.03222	0.004	0	status=JK
YBL036C	YBL036C		1.05669	0.058	1.04982	0.049	0.00078	0.058	0.00101	status=JK
YBL037W	APL3		0.96557	0.138	1.00319	0.046	-0.03981	0.138	0.00079
YBL039C	URA7		0.90222	0.006	0.86275	0.049	0.03484	0.006	1e-05	status=JK
YBL042C	FUI1		1.08036	0.019	1.08319	0.031	-0.00241	0.019	0
YBL043W	ECM13		1.05355	0.051	1.01346	0.024	0.03397	0.051	3e-05
YBL046W	PSY4		1.20031	0.041	1.15292	0.024	0.04384	0.041	0.00039	status=JK
YBL047C	EDE1		1.01966	0.061	0.95146	0.019	0.05937	0.061	6e-05
YBL048W	YBL048W		1.1525	0.03	1.09394	0.042	0.05461	0.03	0.00023	status=JK
YBL049W	MOH1		1.03703	0.01	0.98051	0.091	0.0338	0.01	3e-05	status=JK
YBL051C	PIN4		0.8849	0.065	0.90337	0.032	-0.01186	0.064	0.00011
YBL052C	SAS3		1.05852	0.039	1.07205	0.059	-0.00358	0.039	1e-05
YBL053W	YBL053W		0.9995	0.021	0.9556	0.088	0.04301	0.021	0
YBL054W	TOD6		1.07962	0.061	1.04649	0.071	0.04259	0.061	5e-05
YBL055C	YBL055C		0.91638	0.082	0.95007	0.055	-0.02941	0.082	0.0002
YBL056W	PTC3		1.01555	0.11	0.9723	0.137	0.01516	0.11	0.00035
YBL057C	PTH2		1.07479	0.053	1.07785	0.016	-0.00305	0.053	3e-05
YBL059W	YBL059W		0.88086	0.09	0.87902	0.076	-0.00328	0.089	0.00029
YBL060W	YEL1		0.93706	0.019	0.94209	0.028	0.00462	0.019	0.00014	status=JK
YBL061C	SKT5		0.9879	0.032	1.06371	0.037	-0.06352	0.032	1e-05
YBL062W	YBL062W		1.13543	0.049	1.07446	0.023	0.05834	0.049	0.00062	status=JK
YBL063W	KIP1		1.08408	0.048	1.07226	0.027	0.00478	0.048	2e-05
YBL064C	PRX1		1.01166	0.072	0.9665	0.064	0.04431	0.072	0.0001
YBL065W	YBL065W		1.08299	0.009	1.13775	0.048	-0.05254	0.009	2e-05	status=JK
YBL066C	SEF1		0.91383	0.085	0.83668	0.168	0.06967	0.085	0.00022
YBL067C	UBP13		1.02162	0.075	0.96057	0.105	0.05917	0.075	0.00011
YBL068W	PRS4		1.02201	0.071	1.04005	0.025	-0.02089	0.071	9e-05
YBL069W	AST1		1.03901	0.027	0.98487	0.062	0.0311	0.027	0.00023	status=JK
YBL070C	YBL070C		0.97982	0.09	0.85964	0.057	0.11147	0.09	0.00022
YBL071C	YBL071C		0.98621	0.088	1.05214	0.051	-0.09129	0.087	0.00019
YBL072C	RPS8A		0.51533	0.028	0.38863	0.091	0.1031	0.028	0.00097	status=JK
YBL075C	SSA3		1.035	0.062	0.98342	0.034	0.04541	0.062	6e-05
YBL078C	ATG8		0.87447	0.078	0.86194	0.016	0.01561	0.077	0.00019
YBL079W	NUP170		0.55261	0.021	0.59458	0.02	-0.0431	0.021	0.0005	status=JK
YBL081W	YBL081W		0.96601	0.077	0.96558	0.102	-0.00331	0.077	0.00014
YBL082C	ALG3		1.14368	0.024	1.10265	0.01	0.04521	0.024	0.00015	status=JK
YBL083C	YBL083C		1.00106	0.097	1.00153	0.104	-0.00682	0.097	0.00025
YBL085W	BOI1		0.97365	0.076	1.04356	0.006	-0.07098	0.076	0.00013
YBL086C	YBL086C		1.15364	0.043	1.12151	0.039	0.0219	0.042	1e-05
YBL087C	RPL23A		0.80125	0.024	0.8277	0.121	-0.05382	0.024	0.00031	status=JK
YBL088C	TEL1		1.21694	0.072	1.18084	0.08	0.02716	0.072	6e-05
YBL089W	AVT5		0.84296	0.041	0.81967	0.081	0.01406	0.041	0.00079	status=JK
YBL091C	MAP2		1.11596	0.059	1.08978	0.068	0.04262	0.059	4e-05
YBL091C-A	SCS22		1.0364	0.029	1.01687	0.03	0.01848	0.029	0.00026	status=JK
YBL094C	YBL094C		0.62974	0.258	0.7821	0.225	-0.18886	0.257	0.01642
YBL095W	YBL095W		0.9709	0.062	1.04018	0.015	-0.06705	0.062	7e-05
YBL096C	YBL096C		0.98214	0.062	1.04074	0.014	-0.05778	0.062	7e-05
YBL098W	BNA4		0.99184	0.031	0.94459	0.066	0.0635	0.031	1e-05
YBL100C	YBL100C		1.00795	0.015	1.00257	0.044	0.00246	0.015	7e-05	status=JK
YBL101C	ECM21		0.9621	0.082	0.95087	0.082	0.0347	0.081	0.00017
YBL102W	SFT2		0.99361	0.02	1.02567	0.05	-0.02175	0.02	0.00013	status=JK
YBL103C	RTG3		0.64794	0.029	0.52711	0.072	0.12482	0.029	0.00067	status=JK
YBL103C	RTG3		0.97214	0.145	1.05477	0.015	-0.08137	0.145	0.0009
YBL104C	SEA4		0.9879	0.093	0.85968	0.016	0.12031	0.093	0.00023
YBL106C	SRO77		0.97395	0.018	1.00181	0.028	-0.0244	0.018	0.00012	status=JK
YBL107C	MIC23		0.99572	0.089	0.99314	0.046	0.00722	0.089	0.0002
YBR001C	NTH2		0.9966	0.082	1.02854	0.041	-0.02806	0.082	0.00016
YBR005W	RCR1		1.05023	0.055	1.11703	0.047	-0.07565	0.055	4e-05
YBR006W	UGA2		1.0615	0.102	1.15559	0.131	-0.08977	0.101	0.00024
YBR007C	DSF2		1.03211	0.01	1.15318	0.12	-0.12379	0.01	0
YBR008C	FLR1		1.057	0.053	1.07521	0.186	-0.04253	0.053	3e-05
YBR009C	HHF1		0.88645	0.054	0.91374	0.113	-0.00481	0.054	6e-05
YBR010W	HHT1		0.97637	0.039	0.91702	0.145	0.0371	0.039	0.00054	status=JK
YBR012C	YBR012C		1.00466	0.024	0.90555	0.15	0.09933	0.024	0.00019	status=JK
YBR013C	YBR013C		1.03264	0.046	1.01349	0.182	0.01011	0.046	2e-05
YBR014C	GRX7		0.96651	0.033	0.83492	0.225	0.10146	0.033	1e-05
YBR015C	MNN2		0.91502	0.073	1.00514	0.121	-0.11701	0.073	0.00014
YBR016W	YBR016W		1.0525	0.186	1.13183	0.034	-0.06452	0.186	0.00148
YBR018C	GAL7		1.05475	0.014	0.92629	0.13	0.14472	0.014	6e-05	status=JK
YBR019C	GAL10		0.77858	0.031	0.89084	0.224	-0.09082	0.031	0.00052	status=JK
YBR020W	GAL1		1.04128	0.023	1.11399	0.037	-0.06226	0.023	0.00016	status=JK
YBR020W	GAL1		0.99863	0.055	0.9714	0.016	0.02829	0.055	5e-05
YBR022W	POA1		1.02645	0.087	0.99864	0.017	0.02314	0.086	0.00016
YBR023C	CHS3		1.00554	0.1	1.05476	0.021	-0.04651	0.1	0.00027
YBR024W	SCO2		1.12452	0.126	1.06802	0.062	0.05153	0.126	0.00039
YBR025C	OLA1		0.82215	0.101	0.94503	0.043	-0.12254	0.101	0.0005
YBR026C	ETR1		0.76978	0.068	0.85242	0.029	-0.08555	0.068	0.00019
YBR027C	YBR027C		1.19871	0.045	1.15637	0.012	0.04293	0.044	1e-05
YBR028C	YPK3		1.03542	0.107	1.00364	0.117	0.01469	0.106	0.0003
YBR030W	RKM3		1.04135	0.022	1.02298	0.091	0.00793	0.022	0
YBR031W	RPL4A		0.97851	0.065	1.11315	0.03	-0.12541	0.065	8e-05
YBR032W	YBR032W		0.99125	0.085	1.00894	0.018	-0.01524	0.085	0.00018
YBR033W	EDS1		0.97218	0.036	1.01887	0.017	-0.04881	0.036	0.00046	status=JK
YBR034C	HMT1		0.95122	0.051	0.92957	0.023	0.01865	0.051	4e-05
YBR036C	CSG2		0.76277	0.032	0.73679	0.021	0.02437	0.031	2e-05
YBR040W	FIG1		1.1971	0.034	1.14482	0.036	0.04547	0.034	1e-05
YBR041W	FAT1		1.09114	0.007	1.03722	0.045	0.05736	0.007	1e-05	status=JK
YBR042C	CST26		1.01096	0.045	1.05149	0.015	-0.04321	0.045	2e-05
YBR043C	QDR3		1.07706	0.052	1.03882	0.008	0.03721	0.052	3e-05
YBR044C	TCM62		0.96296	0.056	1.00481	0.052	-0.05763	0.056	5e-05
YBR045C	GIP1		0.9578	0.005	0.97585	0.01	-0.01362	0.005	1e-05	status=JK
YBR046C	ZTA1		0.97851	0.019	1.04564	0.031	-0.07616	0.019	0.00013	status=JK
YBR047W	FMP23		1.0588	0.019	1.01647	0.156	0.00584	0.019	0.00011	status=JK
YBR048W	RPS11B		0.73532	0.036	0.78815	0.033	-0.06074	0.035	3e-05
YBR050C	REG2		1.00068	0.03	0.97318	0.118	0.00113	0.03	1e-05
YBR051W	YBR051W		1.12645	0.065	1.08503	0.037	0.0386	0.065	5e-05
YBR052C	RFS1		0.99483	0.024	1.01067	0.093	-0.02333	0.024	0.0002	status=JK
YBR053C	YBR053C		1.12361	0.071	1.1214	0.032	0.00451	0.071	7e-05
YBR054W	YRO2		0.93313	0.005	0.92214	0.117	0.01056	0.005	1e-05	status=JK
YBR056W	YBR056W		1.01041	0.095	0.996	0.086	0.00382	0.095	0.00023
YBR057C	MUM2		0.93052	0.008	0.97645	0.014	-0.05022	0.008	2e-05	status=JK
YBR058C	UBP14		0.88809	0.047	0.90422	0.004	-0.01919	0.047	4e-05
YBR059C	AKL1		0.93192	0.066	0.91848	0.141	0.01849	0.066	0.0001
YBR061C	TRM7		1.01748	0.119	1.02155	0.055	-0.01203	0.119	0.00043
YBR061C	TRM7		0.58408	0.161	0.6062	0.029	-0.0227	0.161	0.00541
YBR062C	YBR062C		0.99586	0.079	0.97135	0.048	0.02026	0.078	0.00013
YBR063C	YBR063C		1.02254	0.081	1.0088	0.071	0.00581	0.081	0.00014
YBR064W	YBR064W		1.13953	0.054	1.16486	0.046	-0.01326	0.054	3e-05
YBR065C	ECM2		1.08689	0.011	1.05879	0.064	0.04429	0.011	3e-05	status=JK
YBR066C	NRG2		1.10889	0.057	1.05083	0.059	0.0705	0.057	4e-05
YBR067C	TIP1		0.99598	0.136	1.08281	0.158	-0.05931	0.136	0.0007
YBR068C	BAP2		1.01282	0.079	1.13437	0.032	-0.11439	0.079	0.00013
YBR069C	TAT1		1.04783	0.167	1.02064	0.132	0.01207	0.167	0.00109
YBR071W	YBR071W		0.92498	0.064	0.94614	0.039	-0.01679	0.064	9e-05
YBR072W	HSP26		1.06498	0.112	1.09557	0.041	-0.03275	0.112	0.00032
YBR073W	RDH54		0.9578	0.006	1.0096	0.022	-0.04232	0.006	1e-05	status=JK
YBR074W	YBR074W		0.9749	0.015	1.01207	0.013	-0.0356	0.015	8e-05	status=JK
YBR075W	YBR075W		1.13128	0.063	1.0742	0.045	0.06456	0.063	5e-05
YBR075W	YBR075W		1.02172	0.034	1.0477	0.067	-0.03419	0.034	1e-05
YBR076W	ECM8		0.87907	0.023	0.77271	0.118	0.08339	0.023	0
YBR077C	SLM4		1.27732	0.017	1.22855	0.005	0.04851	0.017	6e-05	status=JK
YBR078W	ECM33		1.11952	0.035	1.12456	0.023	-0.00406	0.034	1e-05
YBR082C	UBC4		0.81828	0.099	0.93473	0.006	-0.11752	0.099	0.00048
YBR082C	UBC4		0.89983	0.046	1.0059	0.018	-0.10453	0.046	4e-05
YBR083W	TEC1		1.1634	0.109	1.22588	0.039	-0.08183	0.108	0.00022
YBR084C-A	RPL19A		0.64002	0.148	0.6575	0.202	-0.06824	0.148	0.00324
YBR084W	MIS1		0.99701	0.144	1.04532	0.05	-0.03835	0.144	0.00082
YBR085W	AAC3		0.91915	0.104	0.92871	0.063	0.00938	0.104	0.00039
YBR086C	IST2		1.03999	0.034	1.03836	0.063	-0.0101	0.034	1e-05
YBR090C	YBR090C		0.93998	0.058	0.94899	0.02	-0.0205	0.058	6e-05
YBR090C-A	YBR090C-A		1.07553	0.011	1.02381	0.023	0.05075	0.011	0
YBR092C	PHO3		0.95883	0.039	0.93282	0.022	0.02893	0.039	2e-05
YBR093C	PHO5		0.73993	0.01	0.57878	0.062	0.14423	0.01	7e-05	status=JK
YBR094W	PBY1		1.03256	0.048	1.01708	0.021	0.01819	0.047	3e-05
YBR095C	RXT2		0.8008	0.023	0.84136	0.076	-0.05361	0.023	0.00028	status=JK
YBR095C	RXT2		0.77191	0.059	0.90817	0.029	-0.14515	0.059	0.00012
YBR098W	MMS4		0.96436	0.211	1.07146	0.099	-0.09768	0.211	0.00277
YBR099C	YBR099C		0.95089	0.068	0.93009	0.03	0.00761	0.068	0.0001
YBR100W	YBR100W		1.01703	0.004	1.01118	0.127	0.01344	0.004	0	status=JK
YBR101C	FES1		1.09974	0.029	1.04287	0.043	0.04888	0.029	0.00023	status=JK
YBR103W	SIF2		0.72579	0.112	0.77814	0.065	-0.06876	0.111	0.00098
YBR104W	YMC2		0.8831	0.068	0.85044	0.103	0.01049	0.068	0.00012
YBR105C	VID24		1.04157	0.057	1.05002	0.015	-0.01572	0.057	5e-05
YBR106W	PHO88		0	0	0.04575	0.048	-0.03599	0	#NUM!	status=JK
YBR107C	IML3		1.01248	0.097	0.96971	0.004	0.04217	0.097	0.00024
YBR108W	AIM3		1.0008	0.052	1.04777	0.041	-0.02861	0.052	4e-05
YBR111C	YSA1		1.08994	0.075	1.13447	0.071	-0.06177	0.075	9e-05
YBR113W	YBR113W		1.05183	0.031	0.97666	0.057	0.06127	0.031	0.00028	status=JK
YBR114W	RAD16		1.02077	0.009	1.13562	0.037	-0.1039	0.009	2e-05	status=JK
YBR115C	LYS2		0.4144	0.093	0.3753	0.054	0.03403	0.093	0.003
YBR115C	LYS2		0.59955	0.065	0.68867	0.055	-0.10967	0.065	0.00035
YBR116C	YBR116C		0.98214	0.009	0.93269	0.183	0.04183	0.009	3e-05	status=JK
YBR118W	TEF2		0.88773	0.01	0.92952	0.026	-0.04609	0.01	4e-05	status=JK
YBR119W	MUD1		1.01189	0.1	0.89801	0.098	0.12398	0.1	0.00026
YBR121C	GRS1		0.97753	0.078	0.88477	0.088	0.0815	0.077	0.00014
YBR122C	MRPL36		1.07618	0.031	0.97786	0.15	0.10054	0.031	1e-05
YBR125C	PTC4		0.89293	0.043	1.0126	0.018	-0.1155	0.043	3e-05
YBR126C	TPS1		0.72904	0.014	0.81617	0.013	-0.09199	0.014	0
YBR128C	ATG14		0.98177	0.099	1.02411	0.017	-0.04531	0.098	0.00028
YBR129C	OPY1		0.97326	0.078	0.98172	0.05	-0.01724	0.078	0.00014
YBR130C	SHE3		1.10348	0.03	1.0881	0.08	-0.0086	0.03	1e-05
YBR131W	CCZ1		0.83644	0.077	0.79354	0.056	0.03064	0.077	0.00021
YBR132C	AGP2		1.00021	0.122	1.09658	0.046	-0.08827	0.122	0.00049
YBR134W	YBR134W		1.17501	0.005	1.09896	0.018	0.07415	0.005	1e-05	status=JK
YBR137W	YBR137W		0.95866	0.073	0.90537	0.072	0.06677	0.073	0.00012
YBR138C	YBR138C		1.10827	0.021	1.11551	0.06	0.01049	0.021	0
YBR139W	YBR139W		1.04013	0.01	1.01754	0.081	0.00667	0.01	0
YBR141C	YBR141C		0.98489	0.155	1.06925	0.03	-0.08954	0.155	0.00105
YBR144C	YBR144C		1.10095	0.03	0.95335	0.102	0.13152	0.03	1e-05
YBR145W	ADH5		0.99572	0.023	0.85877	0.03	0.11946	0.023	0.00019	status=JK
YBR146W	MRPS9		0.93179	0.004	1.01947	0.015	-0.08687	0.004	1e-05	status=JK
YBR147W	RTC2		0.83002	0.005	0.91241	0.03	-0.09063	0.005	1e-05	status=JK
YBR148W	YSW1		1.25517	0.092	1.15906	0.042	0.09791	0.092	0.00011
YBR149W	ARA1		0.999	0.066	0.94629	0.056	0.04003	0.066	8e-05
YBR150C	TBS1		0.94881	0.073	0.94516	0.004	0.00365	0.073	0.00013
YBR151W	APD1		0.89642	0.024	0.94329	0.007	-0.05093	0.024	0.00023	status=JK
YBR156C	SLI15		1.00412	0.028	0.96939	0.06	0.05053	0.028	0.00025	status=JK
YBR157C	ICS2		0.96628	0.13	0.94527	0.178	-0.02093	0.13	0.00066
YBR158W	AMN1		0.9087	0.125	0.97075	0.089	-0.05291	0.124	0.0007
YBR159W	IFA38		1.14668	0.089	1.22556	0.055	-0.06593	0.088	0.00013
YBR161W	CSH1		1.09949	0.064	0.97958	0.075	0.12271	0.064	5e-05
YBR162C	TOS1		1.08231	0.051	1.07946	0.024	-0.00932	0.051	3e-05
YBR162W-A	YSY6		0.99351	0.013	1.02115	0.048	-0.02716	0.013	6e-05	status=JK
YBR164C	ARL1		0.94603	0.112	0.88242	0.043	0.06748	0.112	0.00046
YBR165W	UBS1		0.98338	0.051	1.05808	0.066	-0.09656	0.051	4e-05
YBR165W	UBS1		1.05881	0.042	1.01075	0.021	0.04979	0.042	2e-05
YBR166C	TYR1		0.92993	0.03	0.95087	0.11	-0.03749	0.03	1e-05
YBR168W	PEX32		0.92619	0.117	0.95178	0.104	-0.03356	0.116	0.00054
YBR169C	SSE2		1.01782	0.087	0.95306	0.046	0.05853	0.087	0.00017
YBR170C	NPL4		0.6159	0.025	0.66261	0.026	-0.03996	0.025	0.00055	status=JK
YBR171W	SEC66		0.92786	0.086	0.96964	0.064	-0.05353	0.086	0.00022
YBR172C	SMY2		0.97018	0.079	0.94952	0.03	0.01105	0.079	0.00015
YBR174C	YBR174C		0.9696	0.026	1.01346	0.048	-0.03973	0.026	1e-05
YBR175W	SWD3		0.88704	0.05	0.93559	0.031	-0.05151	0.05	5e-05
YBR176W	ECM31		1.06105	0.061	0.98554	0.009	0.06916	0.061	0.0011	status=JK
YBR177C	EHT1		0.99817	0.106	0.96633	0.137	0.00317	0.105	0.00032
YBR178W	YBR178W		1.0999	0.087	1.11907	0.016	-0.02822	0.087	0.00014
YBR180W	DTR1		0.80407	0.146	0.9128	0.065	-0.10689	0.145	0.00159
YBR181C	RPS6B		0.60633	0.095	0.67935	0.112	-0.10021	0.095	0.00105
YBR182C	SMP1		1.01914	0.057	1.0394	0.057	-0.01338	0.057	5e-05
YBR183W	YPC1		1.05998	0.039	0.98359	0.042	0.08133	0.039	0.00045	status=JK
YBR184W	YBR184W		0.98938	0.067	0.99138	0.066	0.00561	0.067	8e-05
YBR185C	MBA1		0.91714	0.047	0.89995	0.059	0.0036	0.047	4e-05
YBR186W	PCH2		1.05376	0.016	0.98207	0.007	0.06726	0.016	7e-05	status=JK
YBR187W	GDT1		0.92168	0.054	0.99373	0.054	-0.06705	0.053	5e-05
YBR188C	NTC20		1.10674	0.021	1.12682	0.069	-0.00862	0.021	0.00012	status=JK
YBR189W	RPS9B		0.36284	0.021	0.36258	0.031	-0.00319	0.021	0.00116	status=JK
YBR194W	AIM4		0.65179	0.086	0.80046	0.05	-0.16147	0.085	0.00061
YBR195C	MSI1		0.99256	0.031	0.91697	0.029	0.06088	0.031	0.00033	status=JK
YBR197C	YBR197C		1.20776	0.074	1.21721	0.077	-0.00042	0.074	6e-05
YBR199W	KTR4		0.92597	0.207	0.9777	0.017	-0.052	0.207	0.00294
YBR200W	BEM1		0.56088	0.113	0.49899	0.069	0.04614	0.113	0.01322	status=JK
YBR201W	DER1		0.95717	0.065	0.95822	0.041	1e-05	0.065	9e-05
YBR203W	COS111		1.10741	0.026	1.16929	0.028	-0.05871	0.026	0
YBR204C	LDH1		0.85226	0.067	1.01863	0.112	-0.18243	0.067	0.00206	status=JK
YBR205W	KTR3		1.031	0.06	1.01277	0.033	0.02133	0.06	5e-05
YBR206W	YBR206W		1.03826	0.04	0.99282	0.081	0.03882	0.04	2e-05
YBR207W	FTH1		1.13651	0.07	0.98645	0.042	0.1368	0.07	6e-05
YBR208C	DUR1		1.04534	0.081	1.11376	0.022	-0.06581	0.081	0.00013
YBR209W	YBR209W		1.14942	0.177	1.11376	0.094	0.06291	0.176	0.00098
YBR210W	ERV15		1.01612	0.016	1.06255	0.046	-0.04802	0.016	8e-05	status=JK
YBR212W	NGR1		1.14168	0.072	0.98718	0.102	0.16128	0.072	7e-05
YBR213W	MET8		1.01212	0.049	0.99355	0.083	0.01139	0.049	3e-05
YBR214W	SDS24		1.03041	0.038	0.9981	0.009	0.03541	0.038	1e-05
YBR215W	HPC2		1.10668	0.084	1.16621	0.046	-0.06922	0.083	0.00012
YBR216C	YBP1		1.04159	0.095	1.04103	0.018	0.00466	0.095	0.00021
YBR217W	ATG12		0.97652	0.005	0.96565	0.055	0.00842	0.005	1e-05	status=JK
YBR218C	PYC2		1.056	0.029	1.05699	0.092	-0.02224	0.028	1e-05
YBR219C	YBR219C		0.92498	0.063	0.9483	0.103	-0.0567	0.063	9e-05
YBR220C	YBR220C		0.97427	0.114	1.03683	0.02	-0.05379	0.114	0.00043
YBR221C	PDB1		0.80587	0.114	0.86346	0.02	-0.04917	0.114	0.00077
YBR222C	PCS60		0.97896	0.01	1.01565	0.111	-0.05731	0.01	4e-05	status=JK
YBR223C	TDP1		0.94027	0.019	0.98306	0.033	-0.05105	0.019	0.00014	status=JK
YBR224W	YBR224W		0.73485	0.231	0.89645	0.155	-0.16602	0.231	0.00786
YBR225W	YBR225W		0.91593	0.118	0.90559	0.006	0.01176	0.118	0.00058
YBR226C	YBR226C		0.97053	0.091	1.01349	0.029	-0.0436	0.09	0.00022
YBR227C	MCX1		0.9042	0.09	1.01105	0.036	-0.10805	0.09	0.00027
YBR228W	SLX1		1.04691	0.031	1.03769	0.054	0.02572	0.031	0.00029	status=JK
YBR229C	ROT2		0.97377	0.092	1.06943	0.022	-0.09331	0.092	0.00023
YBR230C	OM14		0.90008	0.017	1.01927	0.005	-0.12052	0.017	0.00012	status=JK
YBR231C	SWC5		0.34504	0.032	0.3089	0.035	0.03888	0.032	0.0028	status=JK
YBR232C	YBR232C		1.05308	0.109	1.05941	0.04	-0.01087	0.109	0.00031
YBR233W	PBP2		1.02928	0.056	0.95019	0.015	0.07756	0.055	4e-05
YBR235W	VHC1		1.0269	0.089	0.93022	0.075	0.07695	0.089	0.00018
YBR238C	YBR238C		0.60457	0.032	0.63191	0.168	-0.03317	0.032	0.00091	status=JK
YBR239C	ERT1		1.11469	0.096	1.11963	0.047	0.00084	0.095	0.00017
YBR240C	THI2		1.14847	0.004	1.09924	0.033	0.04	0.004	0	status=JK
YBR241C	YBR241C		1.03966	0.016	0.98649	0.019	0.04125	0.016	8e-05	status=JK
YBR242W	YBR242W		0.99002	0.054	0.98958	0.092	0.01131	0.054	5e-05
YBR244W	GPX2		0.88928	0.021	1.00971	0.021	-0.11477	0.021	0.00019	status=JK
YBR245C	ISW1		0.93111	0.111	0.95818	0.008	-0.02389	0.11	0.00046
YBR246W	RRT2		0.92897	0.13	1.07248	0.034	-0.15038	0.13	0.00074
YBR248C	HIS7		0.4897	0.037	0.50252	0.1	-0.01044	0.037	0.00011
YBR249C	ARO4		0.97719	0.065	0.91994	0.058	0.04637	0.065	8e-05
YBR250W	SPO23		1.01142	0.041	1.01503	0.045	-0.00435	0.041	2e-05
YBR255W	MTC4		1.00032	0.049	1.00097	0.154	0.02332	0.049	3e-05
YBR258C	SHG1		1.07274	0.047	1.10397	0.074	-0.04866	0.047	2e-05
YBR259W	YBR259W		0.98885	0.079	0.98019	0.052	0.00512	0.078	0.00014
YBR260C	RGD1		1.09582	0.065	1.12817	0.014	-0.03742	0.065	6e-05
YBR261C	TAE1		1.04652	0.053	1.03896	0.041	0.00807	0.053	0.00085	status=JK
YBR262C	AIM5		0.75935	0.112	0.92948	0.02	-0.17206	0.112	0.00086
YBR263W	SHM1		1.02466	0.137	0.95483	0.077	0.05026	0.136	0.00064
YBR264C	YPT10		1.03763	0.217	0.94057	0.089	0.10209	0.216	0.00242
YBR266C	YBR266C		0.5117	0.076	0.54649	0.144	-0.06945	0.076	0.0009
YBR267W	REI1		0.31142	0.013	0.38676	0.043	-0.06496	0.013	2e-05
YBR269C	FMP21		1.08169	0.054	1.0169	0.086	0.05102	0.054	3e-05
YBR270C	BIT2		1.01481	0.16	0.96965	0.264	0.00319	0.159	0.00105
YBR271W	EFM2		0.92032	0.145	0.89888	0.129	0.05258	0.145	0.00106
YBR272C	HSM3		0.99515	0.082	0.95693	0.12	0.00856	0.082	0.00016
YBR273C	UBX7		0.9998	0.012	1.02127	0.059	-0.01727	0.012	5e-05	status=JK
YBR274W	CHK1		0.9498	0.12	1.01663	0.067	-0.047	0.12	0.00055
YBR275C	RIF1		0.88305	0.101	0.79208	0.038	0.09035	0.101	0.00041
YBR276C	PPS1		0.9721	0.111	0.97323	0.161	0.02392	0.111	0.00041
YBR277C	YBR277C		1.11723	0.095	1.06496	0.003	0.04964	0.095	0.00017
YBR278W	DPB3		0.952	0.137	1.02166	0.037	-0.07582	0.137	0.00081
YBR280C	SAF1		1.001	0.122	0.98009	0.095	0.01195	0.122	0.0005
YBR281C	DUG2		0.97659	0.053	1.04865	0.088	-0.0796	0.053	4e-05
YBR283C	SSH1		0.65562	0.111	0.70265	0.167	-0.04896	0.11	0.00129
YBR284W	YBR284W		0.89922	0.064	0.95106	0.149	-0.07404	0.064	0.0001
YBR285W	YBR285W		1.05916	0.025	1.06712	0.017	-0.01206	0.025	0
YBR286W	APE3		0.96453	0.07	0.99563	0.038	-0.03741	0.07	0.00011
YBR287W	YBR287W		0.94784	0.008	0.84062	0.139	0.0795	0.008	3e-05	status=JK
YBR288C	APM3		0.88687	0.069	0.96918	0.037	-0.07791	0.069	0.00013
YBR289W	SNF5		0.40539	0.088	0.4678	0.046	-0.05635	0.088	0.00268
YBR290W	BSD2		0.99784	0.048	0.99165	0.09	0.00599	0.048	0.00076	status=JK
YBR291C	CTP1		0.79526	0.104	0.80923	0.045	-0.02975	0.104	0.00061
YBR292C	YBR292C		1.01002	0.116	1.0019	0.031	0.00814	0.116	0.00041
YBR293W	VBA2		0.81651	0.177	0.89594	0.067	-0.06588	0.177	0.0027
YBR294W	SUL1		0	0	0	0	0	0	#NUM!	status=JK
YBR295W	PCA1		0.9868	0.015	0.94946	0.011	0.04195	0.015	0
YBR296C	PHO89		1.04679	0.065	1.04321	0.011	0.003	0.065	7e-05
YBR297W	MAL33		0.95378	0.066	0.97957	0.057	-0.04259	0.066	9e-05
YBR298C	MAL31		0.89406	0.127	0.94774	0.04	-0.05265	0.127	0.00078
YBR299W	MAL32		1.13338	0.07	1.10383	0.066	0.04893	0.07	7e-05
YBR300C	YBR300C		1.02526	0.148	1.08078	0.011	-0.05956	0.147	0.00081
YBR301W	PAU24		1.02437	0.075	0.98799	0.093	0.02428	0.075	0.00011
YCL001W	RER1		1.10894	0.056	1.06599	0.114	0.03142	0.056	4e-05
YCL001W-A	YCL001W-A		1.1577	0.124	1.09243	0.14	0.08245	0.124	0.00034
YCL002C	YCL002C		0.89093	0.141	0.93432	0.143	-0.04191	0.141	0.00107
YCL006C	YCL006C		1.05022	0.148	0.97396	0.138	0.04445	0.147	0.00075
YCL009C	ILV6		1.05112	0.079	1.06854	0.142	-0.04286	0.079	0.00012
YCL010C	SGF29		0.84533	0.026	0.86723	0.04	-0.02239	0.026	1e-05
YCL011C	GBP2		1.04905	0.073	1.01784	0.093	0.05014	0.072	9e-05
YCL012W	YCL012W		0.99597	0.096	1.05081	0.06	-0.04307	0.096	0.00025
YCL013W	YCL013W		0.76608	0.188	0.6661	0.025	0.09651	0.187	0.00384
YCL014W	BUD3		1.08941	0.009	0.93796	0.172	0.14741	0.009	2e-05	status=JK
YCL016C	DCC1		0.86031	0.331	1.00056	0.009	-0.13763	0.33	0.01378
YCL022C	YCL022C		0.97299	0.232	0.98188	0.051	0.01742	0.231	0.00354
YCL023C	YCL023C		1.14108	0.289	0.92212	0.181	0.19478	0.289	0.00425
YCL024W	KCC4		0.99463	0.134	0.94404	0.156	0.0749	0.134	0.00067
YCL025C	AGP1		0.71967	0.131	0.84758	0.031	-0.13163	0.13	0.0016
YCL026C	YCL026C		1.1797	0.077	1.21788	0.049	-0.06577	0.077	8e-05
YCL026C-A	FRM2		0.73529	0.169	1.01147	0.052	-0.28971	0.169	0.00321
YCL027W	FUS1		1.07982	0.092	1.10103	0.034	-0.03861	0.092	0.00017
YCL028W	RNQ1		1.07612	0.021	1.06232	0.071	0.00302	0.021	0.00013	status=JK
YCL029C	BIK1		0.974	0.05	0.97479	0.061	-0.01336	0.05	4e-05
YCL030C	HIS4		0.61363	0.102	0.65958	0.032	-0.05035	0.102	0.00123
YCL032W	STE50		0.92165	0.031	0.8298	0.024	0.09601	0.031	0.00037	status=JK
YCL033C	MXR2		0.99854	0.154	1.02036	0.018	-0.03315	0.154	0.001
YCL034W	LSB5		1.0758	0.077	1.05498	0.043	0.02714	0.077	0.0001
YCL035C	GRX1		1.0799	0.069	1.06157	0.069	0.00225	0.069	7e-05
YCL036W	GFD2		1.10575	0.109	1.08714	0.029	0.01512	0.109	0.00026
YCL037C	SRO9		0.6251	0.194	0.78093	0.21	-0.13762	0.194	0.00759
YCL038C	ATG22		0.98469	0.055	1.00132	0.111	-0.0194	0.055	5e-05
YCL039W	GID7		1.04498	0.097	1.11121	0.031	-0.06632	0.097	0.00022
YCL040W	GLK1		1.1269	0.06	1.12666	0.006	0.00023	0.06	4e-05
YCL042W	YCL042W		1.07232	0.06	1.07818	0.025	-0.00906	0.06	5e-05
YCL044C	MGR1		0.83211	0.023	0.83752	0.073	0.01063	0.023	0.00025	status=JK
YCL045C	EMC1		1.10233	0.02	1.08782	0.023	0.01841	0.02	0.00011	status=JK
YCL046W	YCL046W		1.11157	0.109	1.02992	0.092	0.05582	0.109	0.00026
YCL047C	POF1		0.9922	0.161	0.98928	0.093	0.01001	0.16	0.00114
YCL048W	SPS22		0.97608	0.063	0.98869	0.023	-0.01559	0.063	7e-05
YCL049C	YCL049C		0.94385	0.048	0.92459	0.055	0.00302	0.048	4e-05
YCL050C	APA1		1.12277	0.078	1.05843	0.023	0.0495	0.078	9e-05
YCL051W	LRE1		1.12391	0.038	1.10311	0.133	0.04071	0.038	1e-05
YCL055W	KAR4		0.89427	0.05	0.92879	0.031	-0.0404	0.05	5e-05
YCL056C	PEX34		0.96151	0.105	1.06765	0.083	-0.08622	0.104	0.00035
YCL057W	PRD1		1.03497	0.013	1.02808	0.06	-0.00555	0.013	5e-05	status=JK
YCL060C	YCL060C		1.00104	0.042	0.98399	0.056	-0.00659	0.042	0.00058	status=JK
YCL061C	MRC1		1.04387	0.157	0.9982	0.096	0.0552	0.157	0.00092
YCL062W	YCL062W		0.68687	0.098	0.82639	0.099	-0.15965	0.098	0.00079
YCL063W	VAC17		0.98701	0.042	1.04639	0.035	-0.06323	0.042	0.00061	status=JK
YCL064C	CHA1		1.04976	0.019	1.09657	0.012	-0.04451	0.019	0
YCL069W	VBA3		0.94543	0.14	0.85827	0.198	0.08808	0.139	0.00087
YCL074W	YCL074W		0.80087	0.07	0.78414	0.086	0.00058	0.07	0.00018
YCL075W	YCL075W		0.95051	0.062	1.02628	0.047	-0.097	0.062	8e-05
YCL076W	YCL076W		0.95291	0.078	0.90834	0.082	0.04769	0.078	0.00015
YCR001W	YCR001W		1.22123	0.016	1.12072	0.024	0.1018	0.016	0
YCR005C	CIT2		0.98221	0.039	0.97216	0.03	0.0165	0.039	2e-05
YCR006C	YCR006C		1.17442	0.036	1.0628	0.029	0.10685	0.036	0.00031	status=JK
YCR007C	YCR007C		1.10584	0.018	1.13771	0.072	-0.02402	0.018	9e-05	status=JK
YCR008W	SAT4		1.0964	0.105	1.05134	0.05	0.05378	0.105	0.00024
YCR009C	RVS161		0.80721	0.014	0.75058	0.043	0.06882	0.014	9e-05	status=JK
YCR010C	ADY2		1.11471	0.112	1.07352	0.035	0.03575	0.112	0.00028
YCR011C	ADP1		1.14625	0.127	1.18501	0.025	-0.03503	0.127	0.00037
YCR014C	POL4		1.14371	0.058	1.14598	0.076	-0.01388	0.058	4e-05
YCR015C	YCR015C		1.07203	0.009	1.03734	0.033	0.0155	0.009	3e-05	status=JK
YCR016W	YCR016W		1.03484	0.006	0.96499	0.008	0.06719	0.006	1e-05	status=JK
YCR017C	CWH43		1.22064	0.022	1.08921	0.045	0.13144	0.022	0.00011	status=JK
YCR019W	MAK32		1.05295	0.081	1.05015	0.051	0.01241	0.081	0.00013
YCR020C	PET18		1.00708	0.031	0.98556	0.008	0.02079	0.031	1e-05
YCR020C-A	MAK31		1.09765	0.053	1.04621	0.084	0.05632	0.053	3e-05
YCR021C	HSP30		1.15791	0.072	1.16345	0.058	-0.00588	0.072	7e-05
YCR022C	YCR022C		1.25207	0.011	1.06641	0.123	0.16933	0.011	2e-05	status=JK
YCR023C	YCR023C		1.039	0.11	1.08858	0.12	-0.04516	0.11	0.00032
YCR024C-A	PMP1		0.98618	0.069	1.01636	0.092	-0.04108	0.068	9e-05
YCR025C	YCR025C		1.13907	0.09	1.11106	0.065	0.02245	0.09	0.00013
YCR026C	NPP1		1.1037	0.061	1.15181	0.029	-0.05101	0.061	5e-05
YCR027C	RHB1		1.1019	0.062	1.06369	0.093	0.03659	0.062	5e-05
YCR028C-A	RIM1		0.72752	0.026	0.68581	0.045	0.04046	0.026	1e-05
YCR030C	SYP1		1.11601	0.07	1.03334	0.055	0.06705	0.07	7e-05
YCR031C	RPS14A		0.76718	0.09	0.71607	0.046	0.02481	0.09	0.00044
YCR032W	BPH1		0.94813	0.074	0.9103	0.159	3e-05	0.074	0.00013
YCR033W	SNT1		0.55803	0.068	0.48648	0.126	0.04749	0.068	0.00049
YCR034W	FEN1		0.79239	0.03	0.88214	0.021	-0.08108	0.03	2e-05
YCR036W	RBK1		1.10955	0.086	1.04092	0.11	0.06472	0.086	0.00013
YCR037C	PHO87		1.11032	0.065	1.03826	0.059	0.06987	0.065	6e-05
YCR043C	YCR043C		1.15479	0.072	1.16778	0.046	-0.01804	0.072	7e-05
YCR044C	PER1		1.13605	0.072	1.04628	0.08	0.09365	0.072	7e-05
YCR045C	RRT12		1.08273	0.052	1.15086	0.047	-0.06865	0.052	3e-05
YCR048W	ARE1		1.08909	0.094	1.07106	0.042	-0.00652	0.093	0.00017
YCR049C	YCR049C		1.03256	0.049	0.93369	0.173	0.06535	0.049	3e-05
YCR050C	YCR050C		1.02921	0.19	1.08894	0.038	-0.06942	0.19	0.00168
YCR051W	YCR051W		0.95042	0.183	1.15478	0.074	-0.19479	0.183	0.00191
YCR053W	THR4		0.27666	0.017	0.35711	0.112	-0.08697	0.017	0.00124	status=JK
YCR059C	YIH1		0.97805	0.089	1.0217	0.133	-0.04782	0.089	0.00021
YCR060W	TAH1		0.85535	0.085	1.0738	0.058	-0.21106	0.085	0.00027
YCR061W	YCR061W		0.9599	0.015	1.033	0.028	-0.08932	0.015	8e-05	status=JK
YCR062W	YCR062W		1.12594	0.187	1.03784	0.161	0.0924	0.186	0.00123
YCR063W	BUD31		0.1596	0.18	0.47892	0.099	-0.30957	0.18	0.17452
YCR065W	HCM1		1.0008	0.05	1.09148	0.028	-0.10549	0.05	3e-05
YCR067C	SED4		1.1178	0.062	1.09972	0.053	0.02348	0.062	5e-05
YCR068W	ATG15		1.09163	0.046	1.15617	0.067	-0.06457	0.046	2e-05
YCR069W	CPR4		1.25777	0.091	1.19312	0.024	0.05264	0.091	0.0001
YCR071C	IMG2		0.55418	0.103	0.76976	0.032	-0.22352	0.103	0.00172
YCR073C	SSK22		1.13577	0.039	1.04616	0.09	0.06742	0.039	0.0004	status=JK
YCR073W-A	SOL2		1.08792	0.069	1.0105	0.078	0.06352	0.069	7e-05
YCR075C	ERS1		1.08376	0.03	1.10203	0.023	-0.01944	0.03	0.00026	status=JK
YCR076C	FUB1		1.16217	0.087	1.21388	0.053	-0.06307	0.087	0.00011
YCR077C	PAT1		0.74316	0.103	0.77904	0.101	-0.04861	0.102	0.00071
YCR079W	PTC6		0.99416	0.041	0.9935	0.105	0.01904	0.041	0.00056	status=JK
YCR081W	SRB8		0.50288	0.074	0.65073	0.014	-0.14627	0.073	0.00085
YCR082W	AHC2		0.9412	0.029	1.00766	0.02	-0.073	0.029	0.00032	status=JK
YCR083W	TRX3		1.13893	0.109	1.08951	0.018	0.04541	0.109	0.00024
YCR085W	YCR085W		1.00616	0.091	1.11385	0.009	-0.10706	0.091	0.0002
YCR086W	CSM1		1.07069	0.026	1.06307	0.02	0.00222	0.026	0
YCR087C-A	YCR087C-A		1.08629	0.041	1.06982	0.007	0.01201	0.041	1e-05
YCR087W	YCR087W		1.01753	0.158	1.04659	0.073	-0.03814	0.158	0.00101
YCR088W	ABP1		0.97669	0.003	0.97856	0.033	-0.00498	0.003	0	status=JK
YCR089W	FIG2		1.11982	0.031	1.09455	0.023	0.0196	0.031	0.00026	status=JK
YCR090C	YCR090C		1.06779	0.114	0.97745	0.159	0.08784	0.114	0.00033
YCR091W	KIN82		0.8482	0.06	1.00398	0.052	-0.16056	0.059	0.0001
YCR092C	MSH3		0.9331	0.029	1.0201	0.017	-0.09445	0.029	0.00033	status=JK
YCR095C	OCA4		1.13171	0.023	1.05992	0.118	0.08031	0.023	0
YCR098C	GIT1		1.13413	0.053	1.08338	0.015	0.04185	0.053	3e-05
YCR099C	YCR099C		1.04692	0.094	1.04591	0.058	-0.01168	0.094	0.0002
YCR100C	YCR100C		1.18777	0.063	1.18922	0.049	0.01317	0.063	0.00093	status=JK
YCR101C	YCR101C		1.02443	0.105	0.98505	0.124	0.00504	0.105	0.00029
YCR102C	YCR102C		1.06815	0.158	1.02973	0.086	0.04905	0.158	0.00088
YCR102W-A	YCR102W-A		1.02579	0.099	1.0619	0.045	-0.0445	0.099	0.00024
YCR105W	ADH7		0.81461	0.08	0.77466	0.127	0.02158	0.08	0.00026
YCR106W	RDS1		1.09869	0.045	1.1144	0.058	-0.00515	0.045	0.00057	status=JK
YCR107W	AAD3		1.10623	0.085	1.05528	0.008	0.05075	0.085	0.00013
YDL001W	RMD1		0.97576	0.049	0.99912	0.06	-0.03889	0.049	0.00084	status=JK
YDL002C	NHP10		0.87063	0.063	0.86864	0.059	0.01347	0.063	0.00011
YDL006W	PTC1		0.83443	0.109	0.81856	0.056	0.01933	0.109	0.00061
YDL010W	GRX6		1.07125	0.098	1.12113	0.002	-0.05185	0.098	0.00021
YDL011C	YDL011C		1.16213	0.036	1.12268	0.053	0.02535	0.036	1e-05
YDL012C	YDL012C		1.10197	0.058	1.05758	0.087	0.03926	0.058	4e-05
YDL013W	SLX5		0.40131	0.091	0.59475	0.116	-0.16921	0.09	0.00304
YDL018C	ERP3		0.89869	0.094	1.11262	0.039	-0.23657	0.094	0.00031
YDL019C	OSH2		1.05457	0.184	1.05752	0.173	-0.04022	0.183	0.00142
YDL020C	RPN4		0.7368	0.009	0.81623	0.053	-0.07428	0.009	5e-05	status=JK
YDL023C	YDL023C		1.15787	0.038	1.13111	0.062	0.01155	0.038	1e-05
YDL024C	DIA3		0.97056	0.142	1.02129	0.085	-0.05571	0.142	0.00085
YDL025C	RTK1		1.17154	0.004	1.14506	0.037	0.02822	0.004	0	status=JK
YDL026W	YDL026W		0.96965	0.083	0.98415	0.08	-0.01587	0.083	0.00017
YDL027C	YDL027C		0.97537	0.037	0.87914	0.163	0.07054	0.037	0.00049	status=JK
YDL033C	SLM3		0.62975	0.118	0.65823	0.129	-0.02911	0.118	0.00175
YDL034W	YDL034W		0.91832	0.17	0.9682	0.039	-0.04228	0.17	0.0017
YDL035C	GPR1		0.90549	0.075	0.97616	0.044	-0.07933	0.074	0.00015
YDL036C	PUS9		1.09874	0.148	1.20344	0.03	-0.10732	0.148	0.00066
YDL037C	BSC1		1.08759	0.102	1.11925	0.069	-0.01441	0.101	0.00022
YDL038C	YDL038C		1.1151	0.013	0.99834	0.033	0.13197	0.013	4e-05	status=JK
YDL039C	PRM7		1.13629	0.002	1.08278	0.049	0.04927	0.002	0	status=JK
YDL040C	NAT1		1.08635	0.015	1.03976	0.086	0.0677	0.015	6e-05	status=JK
YDL041W	YDL041W		0	0	0	0	0	0	#NUM!
YDL042C	SIR2		0	0	0	0	0	0	#NUM!
YDL046W	NPC2		0.99072	0.066	0.96434	0.043	0.01052	0.066	8e-05
YDL048C	STP4		1.0011	0.108	1.03041	0.088	-0.04731	0.107	0.00034
YDL050C	YDL050C		1.10335	0.071	1.04639	0.098	0.0309	0.071	7e-05
YDL051W	LHP1		0.99962	0.106	1.00533	0.017	-0.00704	0.106	0.00033
YDL052C	SLC1		1.02746	0.101	0.98825	0.09	0.04378	0.101	0.00026
YDL053C	PBP4		0.92048	0.045	0.99821	0.002	-0.07956	0.045	0.00079	status=JK
YDL054C	MCH1		0.997	0.075	1.00319	0.016	-0.01052	0.075	0.00012
YDL056W	MBP1		1.2047	0.01	1.22827	0.075	-0.00375	0.01	2e-05	status=JK
YDL059C	RAD59		1.0759	0.028	1.11755	0.078	-0.03987	0.028	0.00023	status=JK
YDL061C	RPS29B		0.65976	0.012	0.70308	0.05	-0.03449	0.012	0.00011	status=JK
YDL062W	YDL062W		0.86918	0.001	0.90041	0.086	-0.04069	0.001	0	status=JK
YDL065C	PEX19		0.97521	0.054	0.97592	0.019	-0.00335	0.054	5e-05
YDL066W	IDP1		1.13169	0.024	1.0091	0.228	0.08114	0.024	0
YDL070W	BDF2		1.05883	0.017	1.05779	0.052	-0.02415	0.017	9e-05	status=JK
YDL071C	YDL071C		0.90723	0.151	0.97331	0.125	-0.05466	0.15	0.00123
YDL074C	BRE1		0.50931	0.133	0.72952	0.009	-0.22031	0.133	0.00465
YDL074C	BRE1		0.56892	0.158	0.72459	0.124	-0.13778	0.157	0.00548
YDL076C	RXT3		0.85701	0.031	0.89933	0.108	-0.04706	0.03	0.00042	status=JK
YDL077C	VAM6		0.67142	0.048	0.71111	0.093	-0.04374	0.048	0.0001
YDL078C	MDH3		0.70037	0.09	0.56645	0.026	0.1375	0.09	0.00058
YDL079C	MRK1		1.00381	0.104	0.98933	0.135	-0.01374	0.104	0.0003
YDL080C	THI3		0.79123	0.011	0.87578	0.033	-0.08953	0.011	7e-05	status=JK
YDL081C	RPP1A		0.59387	0.034	0.74814	0.028	-0.14041	0.034	0.00109	status=JK
YDL082W	RPL13A		0.67942	0.016	0.82003	0.06	-0.13711	0.016	0.00019	status=JK
YDL083C	RPS16B		0.66328	0.048	0.7132	0.05	-0.06196	0.048	0.0001
YDL085W	NDE2		1.15306	0.038	1.09859	0.078	0.04461	0.038	0.00036	status=JK
YDL086W	YDL086W		1.1743	0.119	1.1443	0.063	0.01567	0.119	0.00029
YDL088C	ASM4		0.9542	0.043	1.02159	0.037	-0.06343	0.043	0.00068	status=JK
YDL089W	NUR1		1.04078	0.05	1.0432	0.006	-0.00081	0.05	3e-05
YDL090C	RAM1		0	0	0	0	0	0	#NUM!
YDL091C	UBX3		1.02357	0.035	1.08826	0.009	-0.07073	0.035	1e-05
YDL093W	PMT5		1.10464	0.115	1.21096	0.029	-0.11854	0.115	0.00031
YDL094C	YDL094C		1.08539	0.047	1.04931	0.061	0.03242	0.047	2e-05
YDL095W	PMT1		0.99176	0.025	0.97987	0.022	0.0155	0.025	0.00021	status=JK
YDL096C	YDL096C		0.9564	0.02	0.97379	0.022	-0.01637	0.02	0.00014	status=JK
YDL099W	BUG1		1.1284	0.077	1.12618	0.003	0.00148	0.077	9e-05
YDL100C	GET3		0.92339	0.017	0.91787	0.054	-0.00918	0.017	0.00012	status=JK
YDL104C	QRI7		0.85435	0.018	0.8302	0.14	-0.01904	0.018	0.00015	status=JK
YDL106C	PHO2		0.95833	0.024	0.9439	0.052	0.00864	0.024	0.0002	status=JK
YDL109C	YDL109C		0.92728	0.022	0.90919	0.068	0.01572	0.022	0
YDL110C	TMA17		0.90754	0.033	0.90766	0.064	-0.01532	0.033	1e-05
YDL112W	TRM3		0.89626	0.14	0.90854	0.044	-0.03475	0.14	0.00103
YDL113C	ATG20		0.92345	0.051	0.98144	0.029	-0.07529	0.051	5e-05
YDL114W	YDL114W		1.10401	0.032	1.03975	0.083	0.06961	0.032	1e-05
YDL117W	CYK3		0.74946	0.028	0.81028	0.026	-0.06104	0.028	0.00047	status=JK
YDL118W	YDL118W		0.87901	0.054	0.90631	0.047	-0.04106	0.054	7e-05
YDL119C	YDL119C		0.91534	0.018	0.98962	0.027	-0.07726	0.018	0.00013	status=JK
YDL121C	YDL121C		0.93885	0.107	0.93722	0.046	0.00179	0.107	0.0004
YDL122W	UBP1		1.06657	0.143	0.95787	0.112	0.08647	0.143	0.00065
YDL123W	SNA4		1.0466	0.106	1.04157	0.058	0.01734	0.106	0.00028
YDL124W	YDL124W		1.15739	0.01	1.09756	0.075	0.06142	0.01	3e-05	status=JK
YDL125C	HNT1		1.04019	0.062	1.02377	0.026	0.01995	0.062	6e-05
YDL127W	PCL2		0.77319	0.181	0.83742	0.065	-0.08299	0.181	0.00338
YDL128W	VCX1		0.9174	0.125	1.02727	0.084	-0.10328	0.125	0.00069
YDL129W	YDL129W		0.96148	0.145	1.03826	0.014	-0.08364	0.145	0.00093
YDL130W	RPP1B		0.98988	0.059	0.96237	0.034	0.02876	0.059	6e-05
YDL130W-A	STF1		1.1721	0.068	1.12532	0.006	0.04591	0.068	5e-05
YDL131W	LYS21		0.95377	0.153	1.0652	0.044	-0.12442	0.152	0.0011
YDL133C-A	RPL41B		1.03892	0.019	1.16661	0.044	-0.12123	0.018	0.00011	status=JK
YDL133W	SRF1		0.96113	0.07	0.9979	0.03	-0.04503	0.069	0.0001
YDL134C	PPH21		1.0274	0.149	1.03775	0.173	-0.02527	0.148	0.00082
YDL134C-A	YDL134C-A		1.06358	0.061	0.96642	0.102	0.09004	0.061	5e-05
YDL135C	RDI1		0.97831	0.05	0.99553	0.041	-0.01651	0.05	4e-05
YDL136W	RPL35B		0.81994	0.084	0.73197	0.218	0.12895	0.084	0.0003
YDL137W	ARF2		1.01112	0.087	0.91543	0.138	0.07321	0.087	0.00017
YDL138W	RGT2		1.04045	0.033	1.08113	0.045	-0.03767	0.033	1e-05
YDL142C	CRD1		0.84457	0.058	0.87518	0.033	-0.02212	0.058	9e-05
YDL144C	YDL144C		1.05071	0.081	1.03081	0.062	0.01821	0.081	0.00012
YDL146W	LDB17		1.00931	0.052	1.03393	0.028	-0.02517	0.052	4e-05
YDL149W	ATG9		1.05928	0.058	0.95647	0.02	0.09184	0.058	5e-05
YDL154W	MSH5		1.05436	0.07	1.11443	0.066	-0.08903	0.07	8e-05
YDL155W	CLB3		1.17885	0.139	1.08621	0.055	0.09138	0.139	0.00045
YDL156W	CMR1		1.01798	0.024	0.91699	0.058	0.11252	0.024	0.00018	status=JK
YDL157C	YDL157C		0.88426	0.075	0.84826	0.028	0.03494	0.075	0.00017
YDL159W	STE7		0	0	0	0	0	0	#NUM!
YDL160C	DHH1		0	0	0	0	0	0	#NUM!
YDL161W	ENT1		0.94668	0.077	0.96462	0.045	-0.00799	0.077	0.00015
YDL162C	YDL162C		1.00224	0.04	1.01752	0.07	-0.0088	0.04	2e-05
YDL167C	NRP1		0.98617	0.047	0.97505	0.02	0.01557	0.047	3e-05
YDL168W	SFA1		1.12714	0.067	1.08468	0.014	0.04469	0.067	6e-05
YDL169C	UGX2		1.05219	0.04	0.94171	0.024	0.10091	0.04	0.00049	status=JK
YDL170W	UGA3		0.83151	0.036	1.0349	0.04	-0.21314	0.036	0.00062	status=JK
YDL171C	GLT1		1.10169	0.036	1.10361	0.141	0.02839	0.036	1e-05
YDL172C	YDL172C		0.95921	0.136	0.85089	0.03	0.10386	0.136	0.00077
YDL173W	PAR32		0.91393	0.081	0.92792	0.051	-0.03567	0.081	0.00019
YDL174C	DLD1		1.15008	0.037	1.17364	0.062	-0.03977	0.037	1e-05
YDL175C	AIR2		1.02459	0.053	1.114	0.096	-0.06766	0.053	4e-05
YDL176W	YDL176W		0.98531	0.06	1.01083	0.096	-0.02979	0.059	6e-05
YDL177C	YDL177C		1.00238	0.014	1.06446	0.089	-0.05011	0.014	7e-05	status=JK
YDL178W	DLD2		1.12743	0.013	1.15234	0.14	-0.02525	0.013	4e-05	status=JK
YDL179W	PCL9		1.05282	0.014	1.15926	0.061	-0.12304	0.014	6e-05	status=JK
YDL180W	YDL180W		0.92902	0.15	0.99633	0.051	-0.06691	0.15	0.00114
YDL181W	INH1		1.02163	0.158	1.07778	0.085	-0.0781	0.157	0.00099
YDL182W	LYS20		1.07112	0.08	0.9004	0.128	0.17083	0.08	0.00012
YDL183C	YDL183C		0.88335	0.121	0.89331	0.088	-0.00643	0.121	0.0007
YDL184C	RPL41A		1.0194	0.026	1.07369	0.108	-0.05622	0.026	0.00021	status=JK
YDL185W	VMA1		1.0171	0.031	1.00855	0.094	0.02493	0.031	1e-05
YDL186W	YDL186W		1.02807	0.037	1.00151	0.108	0.00044	0.037	1e-05
YDL187C	YDL187C		0.99386	0.046	1.05217	0.027	-0.0554	0.046	3e-05
YDL188C	PPH22		0.98556	0.033	1.02717	0.017	-0.04649	0.033	1e-05
YDL189W	RBS1		1.05297	0.023	1.06392	0.033	-0.00503	0.023	0
YDL190C	UFD2		0.94039	0.046	0.98784	0.029	-0.03969	0.046	3e-05
YDL191W	RPL35A		0.83094	0.037	0.84734	0.039	-0.01947	0.037	2e-05
YDL192W	ARF1		0.75753	0.029	0.78877	0.027	-0.02354	0.029	2e-05
YDL194W	SNF3		1.00498	0.008	0.95494	0.028	0.05283	0.008	2e-05	status=JK
YDL197C	ASF2		0.98326	0.017	1.04204	0.016	-0.05772	0.017	0.0001	status=JK
YDL199C	YDL199C		1.06516	0.017	1.02884	0.037	0.02842	0.017	8e-05	status=JK
YDL200C	MGT1		0.99874	0.077	1.05543	0.027	-0.05349	0.077	0.00013
YDL201W	TRM8		1.03507	0.033	0.95908	0.011	0.07397	0.033	1e-05
YDL203C	ACK1		1.08659	0.018	1.01705	0.092	0.06752	0.018	0
YDL204W	RTN2		0.96361	0.016	0.95122	0.013	0.01036	0.016	0
YDL206W	YDL206W		1.07519	0.017	1.0248	0.063	0.05085	0.017	8e-05	status=JK
YDL210W	UGA4		1.0938	0.045	1.06068	0.018	0.02804	0.045	2e-05
YDL211C	YDL211C		1.08016	0.016	1.0553	0.074	0.00183	0.016	0
YDL213C	NOP6		0.97599	0.048	1.01698	0.018	-0.04616	0.048	3e-05
YDL214C	PRR2		1.03424	0.013	1.0638	0.04	-0.0196	0.013	5e-05	status=JK
YDL215C	GDH2		0.9214	0.031	0.90546	0.005	0.01752	0.031	1e-05
YDL216C	RRI1		0.97554	0.065	0.97789	0.005	-0.00449	0.065	8e-05
YDL218W	YDL218W		0.9991	0.048	0.98068	0.1	0.01204	0.048	3e-05
YDL219W	DTD1		1.00909	0.05	1.04442	0.031	-0.03196	0.05	3e-05
YDL222C	FMP45		0.99716	0.047	1.01128	0.04	-0.00613	0.047	3e-05
YDL223C	HBT1		1.02573	0.003	1.05257	0.013	-0.02337	0.003	0	status=JK
YDL224C	WHI4		0.98885	0.057	1.02301	0.039	-0.03358	0.057	5e-05
YDL226C	GCS1		1.00109	0.045	0.99197	0.029	0.00987	0.045	3e-05
YDL227C	HO		0.93748	0.045	0.93019	0.041	0.0063	0.045	3e-05
YDL229W	SSB1		0.86401	0.074	0.80276	0.081	0.07029	0.074	0.00017
YDL230W	PTP1		1.04892	0.019	1.01657	0.034	0.03264	0.019	0.0001	status=JK
YDL231C	BRE4		0.98863	0.072	1.01154	0.033	-0.02889	0.072	0.00011
YDL232W	OST4		0.73853	0.047	0.67667	0.03	0.06877	0.047	7e-05
YDL233W	MFG1		1.07454	0.062	1.18746	0.019	-0.11086	0.062	5e-05
YDL234C	GYP7		0.96375	0.064	0.96438	0.131	0.00358	0.064	8e-05
YDL236W	PHO13		0.9547	0.015	0.89112	0.077	0.05332	0.015	8e-05	status=JK
YDL237W	AIM6		1.07927	0.042	1.11536	0.011	-0.03709	0.042	2e-05
YDL238C	GUD1		1.09828	0.013	1.06306	0.036	0.03911	0.013	5e-05	status=JK
YDL239C	ADY3		0.95051	0.056	0.9198	0.021	0.03315	0.055	5e-05
YDL240W	LRG1		0.88154	0.006	0.95267	0.067	-0.06389	0.006	1e-05	status=JK
YDL241W	YDL241W		1.07991	0.025	1.05617	0.057	0.00775	0.025	0
YDL242W	YDL242W		1.01858	0.1	1.04085	0.034	-0.02956	0.1	0.00026
YDL243C	AAD4		1.05093	0.035	1.05226	0.006	-0.00056	0.034	1e-05
YDR001C	NTH1		0.94639	0.035	0.95522	0.028	-0.00948	0.035	1e-05
YDR003W	RCR2		1.00818	0.009	1.01	0.085	-0.0092	0.009	3e-05	status=JK
YDR004W	RAD57		0.90095	0.007	0.85695	0.105	0.05538	0.007	2e-05	status=JK
YDR005C	MAF1		0.9993	0.036	0.97351	0.024	0.01804	0.036	1e-05
YDR006C	SOK1		0.89044	0.026	0.90414	0.004	-0.016	0.026	1e-05
YDR007W	TRP1		1.01336	0.029	1.02527	0.014	-0.01629	0.029	1e-05
YDR008C	YDR008C		1.06539	0.032	1.06628	0.018	0.00756	0.032	1e-05
YDR009W	GAL3		1.05548	0.039	1.03623	0.065	0.02789	0.039	1e-05
YDR010C	YDR010C		1.03332	0.093	1.06318	0.104	-0.03381	0.093	0.0002
YDR011W	SNQ2		1.02128	0.03	0.96419	0.095	0.05866	0.03	1e-05
YDR014W	RAD61		0.97873	0.017	1.0168	0.011	-0.03356	0.017	0
YDR015C	YDR015C		0.96086	0.082	0.98683	0.018	-0.01794	0.082	0.00017
YDR018C	YDR018C		1.05218	0.025	1.06603	0.076	-0.03415	0.025	0
YDR019C	GCV1		0.98216	0.109	1.01387	0.096	-0.04148	0.109	0.00037
YDR020C	DAS2		1.04891	0.028	1.04401	0.032	0.00767	0.028	1e-05
YDR022C	ATG31		1.09903	0.037	1.05503	0.012	0.03673	0.037	1e-05
YDR024W	YDR024W		0.80658	0.045	0.78377	0.06	0.01154	0.045	5e-05
YDR025W	RPS11A		0.78924	0.015	0.85921	0.08	-0.08861	0.015	0
YDR026C	NSI1		1.06376	0.035	1.05589	0.017	0.00811	0.035	1e-05
YDR029W	YDR029W		1.07912	0.048	1.03162	0.024	0.04299	0.048	2e-05
YDR030C	RAD28		1.06238	0.068	1.04234	0.091	0.02392	0.068	7e-05
YDR031W	MIC14		0.93946	0.054	0.97831	0.094	-0.04995	0.054	5e-05
YDR032C	PST2		0.96542	0.027	0.97893	0.025	-0.0061	0.027	1e-05
YDR033W	MRH1		1.0304	0.053	1.0239	0.024	0.02077	0.053	4e-05
YDR034C	LYS14		0.45614	0.108	0.56332	0.035	-0.10235	0.108	0.00351
YDR035W	ARO3		1.07986	0.088	0.98324	0.082	0.11672	0.088	0.00015
YDR036C	EHD3		0.83709	0.093	0.88014	0.024	-0.04642	0.093	0.00038
YDR042C	YDR042C		0.98152	0.205	1.08035	0.082	-0.11721	0.205	0.00242
YDR043C	NRG1		1.0494	0.105	0.99372	0.135	0.03856	0.105	0.00027
YDR046C	BAP3		1.01397	0.021	1.01727	0.098	0.00434	0.021	0
YDR048C	YDR048C		0.98602	0.039	1.03302	0.022	-0.05023	0.039	2e-05
YDR049W	VMS1		0.80646	0.082	0.95257	0.042	-0.15679	0.082	0.00029
YDR051C	DET1		0.92465	0.082	0.88579	0.034	0.02139	0.082	0.00019
YDR055W	PST1		0.98953	0.114	1.05119	0.095	-0.05896	0.114	0.00042
YDR056C	YDR056C		1.06464	0.055	0.94941	0.152	0.1151	0.055	4e-05
YDR057W	YOS9		1.08462	0.082	1.10222	0.066	-0.02993	0.082	0.00012
YDR058C	TGL2		0.92736	0.015	0.91375	0.015	0.01585	0.015	0
YDR059C	UBC5		1.1246	0.04	1.0144	0.255	0.11447	0.04	1e-05
YDR061W	YDR061W		1.04014	0.002	1.04748	0.018	-0.01895	0.002	0	status=JK
YDR063W	AIM7		1.00827	0.006	1.06677	0.04	-0.06149	0.006	1e-05	status=JK
YDR066C	RTR2		1.04879	0.073	1.00072	0.208	0.04635	0.073	9e-05
YDR067C	OCA6		1.06824	0.018	1.09523	0.058	-0.02483	0.018	0.0001	status=JK
YDR068W	DOS2		1.11373	0.031	1.15544	0.096	-0.08074	0.031	0.00026	status=JK
YDR070C	FMP16		0.97714	0.079	1.07261	0.08	-0.10809	0.079	0.00014
YDR071C	PAA1		0.93955	0.07	0.79807	0.024	0.13386	0.07	0.00011
YDR072C	IPT1		0.97757	0.055	0.98772	0.06	-0.02668	0.054	5e-05
YDR073W	SNF11		1.12727	0.036	1.09547	0.091	0.02345	0.036	1e-05
YDR074W	TPS2		0.95039	0.019	0.84707	0.183	0.0443	0.019	0
YDR075W	PPH3		0.98046	0.084	1.02984	0.053	-0.05088	0.084	0.00017
YDR076W	RAD55		0.78573	0.037	0.83168	0.051	-0.06065	0.037	3e-05
YDR077W	SED1		0.98048	0.021	0.95478	0.072	0.00375	0.021	0
YDR080W	VPS41		0.81288	0.016	0.84543	0.033	-0.04118	0.015	0.00012	status=JK
YDR083W	RRP8		0.71368	0.022	0.81769	0.009	-0.10757	0.022	1e-05
YDR084C	TVP23		1.05288	0.046	1.07845	0.023	-0.03284	0.046	2e-05
YDR085C	AFR1		1.09922	0.078	1.09788	0.077	0.02005	0.078	0.0001
YDR089W	YDR089W		1.08053	0.001	1.08178	0.011	-0.00208	0.001	0	status=JK
YDR090C	YDR090C		1.08876	0.033	1.06902	0.006	0.01843	0.033	1e-05
YDR092W	UBC13		0.92826	0.022	0.81555	0.095	0.11113	0.022	0.00019	status=JK
YDR093W	DNF2		1.02992	0.03	1.03361	0.082	-0.02084	0.03	1e-05
YDR094W	YDR094W		0.95824	0.008	1.0044	0.012	-0.04803	0.008	2e-05	status=JK
YDR095C	YDR095C		1.03215	0.015	0.99714	0.046	0.02804	0.015	7e-05	status=JK
YDR096W	GIS1		0.99393	0.045	1.01991	0.034	-0.02752	0.045	3e-05
YDR097C	MSH6		0.9581	0.017	0.95622	0.044	-0.00443	0.017	0.00011	status=JK
YDR098C	GRX3		1.04454	0.027	1.07821	0.008	-0.0357	0.027	0
YDR099W	BMH2		0.88866	0.037	0.90373	0.067	-0.02781	0.037	2e-05
YDR100W	TVP15		0.98666	0.018	1.01582	0.051	-0.02013	0.018	0.00012	status=JK
YDR101C	ARX1		0.78718	0.021	0.82119	0.022	-0.0358	0.021	1e-05
YDR102C	YDR102C		0.99783	0.048	1.01673	0.029	-0.02396	0.048	3e-05
YDR103W	STE5		0	0	0.00305	0.004	-0.00202	0	#NUM!	status=JK
YDR104C	SPO71		0.97934	0.047	1.0055	0.055	-0.02712	0.047	3e-05
YDR105C	TMS1		1.10036	0.012	1.09126	0.075	-0.01116	0.012	4e-05	status=JK
YDR107C	TMN2		1.04033	0.007	0.99673	0.044	0.04758	0.007	2e-05	status=JK
YDR108W	TRS85		0.97338	0.029	0.93319	0.015	0.03445	0.029	1e-05
YDR109C	YDR109C		1.09196	0.06	1.11333	0.053	-0.03108	0.06	5e-05
YDR110W	FOB1		1.08372	0.043	1.07115	0.061	0.02728	0.043	2e-05
YDR111C	ALT2		0.94255	0.092	0.91886	0.107	-0.01531	0.092	0.00026
YDR112W	YDR112W		1.03584	0.026	1.02514	0.019	0.01137	0.026	0
YDR116C	MRPL1		0.81584	0.02	0.79583	0.046	0.01239	0.02	0
YDR117C	TMA64		1.04233	0.012	0.97554	0.032	0.06382	0.012	0
YDR119W	VBA4		0.99761	0.067	1.06843	0.189	-0.12186	0.067	8e-05
YDR120C	TRM1		1.04149	0.008	0.98116	0.138	0.03865	0.008	2e-05	status=JK
YDR121W	DPB4		1.06714	0.009	1.01686	0.063	0.05261	0.009	0
YDR122W	KIN1		1.04899	0.051	1.06168	0.009	-0.01683	0.051	3e-05
YDR123C	INO2		0.69968	0.047	0.71672	0.009	-0.01855	0.047	8e-05
YDR124W	YDR124W		1.04949	0.009	1.01041	0.095	0.01294	0.009	3e-05	status=JK
YDR125C	ECM18		1.03857	0.085	1.01596	0.099	0.01984	0.085	0.00015
YDR126W	SWF1		0.71637	0.114	0.7911	0.054	-0.08267	0.114	0.00108
YDR127W	ARO1		0.85242	0.009	0.80317	0.005	0.04565	0.009	4e-05	status=JK
YDR128W	MTC5		0.79966	0.007	0.77034	0.041	0.02018	0.007	2e-05	status=JK
YDR130C	FIN1		0.99117	0.036	1.06932	0.071	-0.0825	0.036	1e-05
YDR131C	YDR131C		0.97905	0.044	1.0124	0.078	-0.01593	0.044	3e-05
YDR132C	YDR132C		0.94272	0.04	1.0212	0.016	-0.08204	0.04	2e-05
YDR133C	YDR133C		1.09728	0.002	1.10068	0.041	-0.00611	0.002	0	status=JK
YDR134C	YDR134C		0.99021	0.012	1.00933	0.007	-0.02036	0.012	0
YDR135C	YCF1		1.06439	0.021	1.02836	0.051	0.02703	0.021	0
YDR139C	RUB1		0.96314	0.046	1.0027	0.011	-0.04499	0.046	3e-05
YDR142C	PEX7		0.97026	0.048	0.99135	0.041	-0.01631	0.048	3e-05
YDR143C	SAN1		1.15765	0.002	1.14942	0.023	-0.00632	0.002	0	status=JK
YDR144C	MKC7		0.8415	0.048	0.88896	0.019	-0.05231	0.048	5e-05
YDR146C	SWI5		1.01185	0.073	1.02916	0.056	-0.01313	0.072	0.0001
YDR147W	EKI1		0.96642	0.028	0.92231	0.052	0.02549	0.028	1e-05
YDR148C	KGD2		1.01504	0.013	1.11813	0.007	-0.10642	0.013	0
YDR149C	YDR149C		0.88507	0.027	0.96954	0.031	-0.08837	0.027	1e-05
YDR150W	NUM1		0.87304	0.056	0.93681	0.045	-0.06661	0.056	7e-05
YDR151C	CTH1		1.03795	0.035	1.04806	0.004	-0.01186	0.035	1e-05
YDR152W	GIR2		1.1298	0.031	1.08814	0.036	0.03388	0.031	1e-05
YDR153C	ENT5		1.03343	0.01	0.98611	0.069	0.04697	0.01	0
YDR154C	YDR154C		0.94797	0.04	0.90056	0.117	0.04675	0.04	0.0006	status=JK
YDR155C	CPR1		1.0957	0.016	1.00203	0.149	0.09394	0.016	0
YDR156W	RPA14		0.97454	0.035	0.9715	0.082	0.02336	0.035	1e-05
YDR157W	YDR157W		1.0857	0.043	1.11579	0.009	-0.03109	0.043	2e-05
YDR158W	HOM2		0.91685	0.041	0.86508	0.052	0.05774	0.041	2e-05
YDR159W	SAC3		0.63722	0.013	0.78956	0.035	-0.14725	0.013	0.00013	status=JK
YDR161W	YDR161W		0.90442	0.027	0.9686	0.077	-0.06933	0.027	1e-05
YDR162C	NBP2		0.91141	0.006	0.90749	0.117	-0.03471	0.006	1e-05	status=JK
YDR163W	CWC15		1.08011	0.029	1.14358	0.033	-0.06431	0.029	1e-05
YDR165W	TRM82		0.90667	0.046	0.96051	0.05	-0.05642	0.046	4e-05
YDR169C	STB3		1.04022	0.067	1.05378	0.147	0.02205	0.067	7e-05
YDR171W	HSP42		1.05535	0.011	0.93949	0.238	0.05769	0.011	3e-05	status=JK
YDR173C	ARG82		0.46445	0.048	0.6151	0.057	-0.16216	0.048	0.00031
YDR174W	HMO1		0.6525	0.047	0.69449	0.049	-0.04172	0.047	0.0001
YDR178W	SDH4		0.94214	0.106	1.11909	0.065	-0.18066	0.106	0.00039
YDR179C	CSN9		1.01688	0.036	1.02919	0.16	0.01027	0.036	1e-05
YDR179W-A	YDR179W-A		0.93863	0.072	0.88009	0.129	0.04918	0.072	0.00012
YDR181C	SAS4		1.02137	0.092	0.79897	0.057	0.24391	0.092	0.0002
YDR183W	PLP1		0.93804	0.005	0.95968	0.086	-0.04823	0.005	1e-05	status=JK
YDR184C	ATC1		0.94724	0.027	0.9113	0.013	0.03815	0.027	1e-05
YDR185C	UPS3		1.03072	0.025	1.13399	0.01	-0.10326	0.025	0
YDR186C	YDR186C		1.01951	0.088	1.00271	0.058	0.02764	0.088	0.00017
YDR191W	HST4		0.86014	0.04	0.83795	0.045	0.02071	0.04	3e-05
YDR192C	NUP42		1.05324	0.072	1.09666	0.027	-0.04136	0.072	9e-05
YDR193W	YDR193W		1.03506	0.009	1.03779	0.003	-0.00349	0.009	0
YDR198C	RKM2		1.07677	0.085	1.0252	0.066	0.05867	0.085	0.00013
YDR199W	YDR199W		1.10337	0.011	1.07263	0.034	0.0231	0.01	3e-05	status=JK
YDR202C	RAV2		0.85522	0.087	0.87041	0.115	-0.01187	0.087	0.00029
YDR203W	YDR203W		1.03304	0.012	0.9856	0.136	0.0293	0.012	4e-05	status=JK
YDR205W	MSC2		1.00885	0.008	1.00832	0.025	0.00444	0.008	2e-05	status=JK
YDR206W	EBS1		1.0453	0.015	1.00978	0.031	0.04154	0.015	0
YDR207C	UME6		0.62082	0.002	0.66943	0.002	-0.04848	0.002	0	status=JK
YDR209C	YDR209C		0.98411	0.011	1.01719	0.009	-0.036	0.011	0
YDR210W	YDR210W		1.0841	0.042	1.08559	0.016	-0.002	0.042	2e-05
YDR213W	UPC2		1.02695	0.032	0.99681	0.017	0.03024	0.032	1e-05
YDR214W	AHA1		1.01195	0.019	1.08954	0.026	-0.07886	0.019	0.00012	status=JK
YDR215C	YDR215C		1.03933	0.026	1.05619	0.034	-0.01982	0.026	0
YDR216W	ADR1		0.95142	0.019	0.95308	0.003	-0.00318	0.019	0
YDR217C	RAD9		0.98621	0.013	0.98401	0.037	-0.00892	0.013	6e-05	status=JK
YDR218C	SPR28		0.97497	0.056	0.95561	0.114	-0.00303	0.056	5e-05
YDR219C	MFB1		0.89244	0.04	0.88196	0.003	0.0086	0.04	3e-05
YDR220C	YDR220C		1.06241	0.007	1.0368	0.062	0.02681	0.007	1e-05	status=JK
YDR221W	GTB1		1.06887	0.019	1.06027	0.012	0.0066	0.019	0
YDR222W	YDR222W		1.01198	0.041	0.97464	0.008	0.03679	0.041	2e-05
YDR223W	CRF1		1.02671	0.014	1.02701	0.049	-0.00857	0.014	6e-05	status=JK
YDR225W	HTA1		0.8027	0.031	0.85513	0.089	-0.0733	0.031	2e-05
YDR227W	SIR4		0	0	0	0	0	0	#NUM!
YDR229W	IVY1		1.06278	0.047	1.04855	0.013	0.01417	0.047	2e-05
YDR233C	RTN1		0.97686	0.011	0.9845	0.022	-0.00869	0.011	4e-05	status=JK
YDR234W	LYS4		0.58706	0.038	0.69535	0.033	-0.10732	0.038	8e-05
YDR239C	YDR239C		1.00649	0.056	0.99795	0.071	0.02564	0.056	5e-05
YDR241W	YDR241W		0.90944	0.07	0.93181	0.073	-0.03932	0.07	0.00012
YDR242W	AMD2		1.08499	0.131	1.02302	0.104	0.03189	0.13	0.00048
YDR244W	PEX5		0.90752	0.033	0.90569	0.052	0.00316	0.033	0.00044	status=JK
YDR245W	MNN10		0.88763	0.038	0.89541	0.028	-0.00681	0.038	2e-05
YDR247W	VHS1		0.97753	0.044	0.96267	0.05	0.02016	0.043	2e-05
YDR248C	YDR248C		1.07671	0.054	1.06697	0.019	0.01176	0.054	4e-05
YDR249C	YDR249C		1.1097	0.074	1.061	0.055	0.02275	0.074	8e-05
YDR250C	YDR250C		0.99877	0.016	1.02357	0.038	-0.02529	0.016	8e-05	status=JK
YDR251W	PAM1		1.06227	0.061	1.01808	0.04	0.05176	0.061	5e-05
YDR252W	BTT1		1.04166	0.039	1.06937	0.021	-0.02651	0.039	1e-05
YDR253C	MET32		0.9919	0.019	0.99375	0.058	-0.019	0.019	0
YDR254W	CHL4		1.04057	0.011	1.07165	0.091	-0.06099	0.011	4e-05	status=JK
YDR255C	RMD5		1.05421	0.063	1.04443	0.038	-0.0006	0.063	6e-05
YDR256C	CTA1		1.00962	0.045	1.0237	0.009	-0.01701	0.045	2e-05
YDR257C	RKM4		0.86274	0.123	0.89437	0.044	-0.03621	0.123	0.00078
YDR258C	HSP78		0.98863	0.103	1.00662	0.066	-0.0355	0.103	0.00031
YDR259C	YAP6		1.00553	0.182	1.03944	0.103	-0.04309	0.182	0.00159
YDR260C	SWM1		1.09449	0.004	1.13355	0.041	-0.03015	0.004	0	status=JK
YDR261C	EXG2		1.05898	0.027	1.06308	0.072	-0.01579	0.026	0
YDR262W	YDR262W		1.02462	0.01	1.06401	0.003	-0.0409	0.01	3e-05	status=JK
YDR263C	DIN7		0.96113	0.061	0.94555	0.024	0.01684	0.061	7e-05
YDR265W	PEX10		0.95523	0.012	0.9686	0.043	-0.00104	0.012	5e-05	status=JK
YDR266C	HEL2		1.0403	0.078	1.09702	0.026	-0.06068	0.078	0.00012
YDR269C	YDR269C		1.0624	0.108	1.05487	0.048	0.0032	0.108	0.00029
YDR270W	CCC2		1.04568	0.028	1.03618	0.023	0.00367	0.028	1e-05
YDR271C	YDR271C		1.0211	0.049	0.97103	0.046	0.04913	0.049	3e-05
YDR272W	GLO2		1.04706	0.017	1.02455	0.004	0.02118	0.017	0
YDR273W	DON1		1.05388	0.019	1.01708	0.016	0.02789	0.018	0
YDR274C	YDR274C		1.08741	0.006	1.06786	0.098	0.03361	0.006	1e-05	status=JK
YDR275W	BSC2		1.00106	0.052	0.99106	0.051	0.01333	0.052	4e-05
YDR276C	PMP3		0.90032	0.011	0.96746	0.041	-0.08014	0.011	0
YDR277C	MTH1		1.01028	0.043	1.026	0.004	-0.01539	0.043	2e-05
YDR278C	YDR278C		0.7454	0.118	0.83805	0.073	-0.10928	0.118	0.00108
YDR279W	RNH202		0.96287	0.036	0.9622	0.045	-0.00792	0.036	1e-05
YDR281C	PHM6		1.03565	0.045	1.0898	0.042	-0.04684	0.045	2e-05
YDR282C	YDR282C		1.07122	0.038	1.08749	0.116	-0.0531	0.038	1e-05
YDR284C	DPP1		1.0244	0.053	1.02627	0.044	0.0005	0.053	4e-05
YDR285W	ZIP1		1.03654	0.114	1.10965	0.048	-0.04686	0.114	0.00037
YDR286C	YDR286C		0.95511	0.055	1.01951	0.012	-0.06599	0.055	5e-05
YDR287W	INM2		1.03766	0.028	1.06512	0.051	-0.03073	0.028	1e-05
YDR289C	RTT103		0.79745	0.049	0.88413	0.017	-0.08257	0.049	6e-05
YDR290W	YDR290W		0.7807	0.079	0.85823	0.016	-0.07747	0.078	0.00028
YDR291W	HRQ1		1.02845	0.022	0.76711	0.051	0.27629	0.022	0.00016	status=JK
YDR293C	SSD1		1.18167	0.057	1.21205	0.287	-0.03657	0.057	0.00077	status=JK
YDR294C	DPL1		1.01264	0.09	0.85934	0.181	0.10932	0.09	0.00019
YDR297W	SUR2		0.93022	0.016	0.97469	0.039	-0.03896	0.016	0
YDR304C	CPR5		1.0257	0.092	0.93418	0.113	0.08689	0.092	0.0002
YDR305C	HNT2		1.05072	0.047	0.99158	0.06	0.06277	0.047	2e-05
YDR306C	YDR306C		0.95314	0.043	0.93867	0.08	0.00109	0.043	3e-05
YDR307W	PMT7		1.0195	0.008	0.99498	0.095	0.04171	0.008	2e-05	status=JK
YDR309C	GIC2		0.97739	0.034	1.03471	0.034	-0.05527	0.034	1e-05
YDR310C	SUM1		1.051	0.056	1.06052	0.048	-0.01483	0.056	4e-05
YDR312W	SSF2		1.07934	0.024	1.16028	0.003	-0.08189	0.024	0
YDR313C	PIB1		1.01194	0.01	1.00936	0.035	0.00653	0.01	0
YDR314C	RAD34		1.09958	0.053	1.10168	0.038	0.00073	0.053	3e-05
YDR315C	IPK1		0.89426	0.045	0.90024	0.026	-0.00652	0.045	4e-05
YDR316W	OMS1		0.92416	0.02	0.87697	0.046	0.05252	0.02	0
YDR317W	HIM1		1.08665	0.03	1.13506	0.061	-0.0361	0.03	1e-05
YDR318W	MCM21		0.94094	0.008	1.05939	0.043	-0.12787	0.008	3e-05	status=JK
YDR319C	YFT2		1.03302	0.006	1.04349	0.019	-0.01032	0.006	1e-05	status=JK
YDR320C	SWA2		0.92588	0.046	0.93165	0.012	-0.01348	0.046	3e-05
YDR321W	ASP1		1.10914	0.017	1.05579	0.071	0.05657	0.017	0
YDR326C	YSP2		1.13074	0.038	0.74294	0.206	0.38563	0.038	1e-05
YDR329C	PEX3		0.89829	0.015	0.91113	0.027	-0.00915	0.015	0
YDR330W	UBX5		1.1129	0.029	1.09967	0.038	0.01979	0.029	0
YDR332W	IRC3		1.01903	0.002	0.98312	0.023	0.03194	0.002	0	status=JK
YDR333C	YDR333C		1.00393	0.021	1.02304	0.038	-0.01837	0.021	0
YDR334W	SWR1		0.75608	0.03	0.74487	0.008	0.01137	0.03	2e-05
YDR335W	MSN5		0.86915	0.01	0.87295	0.063	0.00295	0.01	0
YDR336W	YDR336W		0.84851	0.104	0.77294	0.117	0.06708	0.103	0.00049
YDR338C	YDR338C		1.00838	0.087	0.96929	0.12	0.07104	0.087	0.00018
YDR340W	YDR340W		1.03864	0.049	1.04187	0.021	-0.00287	0.049	3e-05
YDR344C	YDR344C		1.0177	0.032	1.02211	0.049	-0.00783	0.032	1e-05
YDR345C	HXT3		1.00379	0.048	1.02938	0.01	-0.02749	0.048	3e-05
YDR346C	SVF1		1.01073	0.031	1.02877	0.043	-0.02658	0.031	1e-05
YDR348C	PAL1		0.93082	0.05	0.94201	0.086	-0.01572	0.05	4e-05
YDR349C	YPS7		1.02783	0.028	1.02287	0.068	0.00909	0.028	1e-05
YDR351W	SBE2		0.9652	0.074	1.00024	0.033	-0.03757	0.074	0.00013
YDR352W	YPQ2		1.12826	0.089	1.08304	0.093	0.03478	0.088	0.00013
YDR354W	TRP4		0.9792	0.038	0.95611	0.031	0.02449	0.038	2e-05
YDR357C	CNL1		0.95324	0.023	0.95685	0.08	-0.0197	0.022	0.00019	status=JK
YDR358W	GGA1		1.04378	0.058	1.08621	0.048	-0.04811	0.058	5e-05
YDR359C	EAF1		0.43609	0.121	0.47689	0.035	-0.04331	0.121	0.00552
YDR360W	YDR360W		0.95668	0.001	0.96309	0.029	-0.0063	0.001	0	status=JK
YDR363W	ESC2		0.94184	0.012	0.93678	0.042	0.01514	0.012	6e-05	status=JK
YDR363W-A	SEM1		1.01188	0.032	1.03563	0.046	-0.0008	0.032	0.00033	status=JK
YDR368W	YPR1		1.01335	0.011	0.98172	0.01	0.03504	0.011	4e-05	status=JK
YDR369C	XRS2		1.06956	0.011	1.0576	0.025	0.0092	0.011	4e-05	status=JK
YDR370C	YDR370C		1.01693	0.047	1.02456	0.061	-0.01877	0.046	3e-05
YDR371W	CTS2		1.02829	0.01	1.04809	0.035	-0.01831	0.01	3e-05	status=JK
YDR372C	VPS74		1.02458	0.005	1.00989	0.041	0.00849	0.005	1e-05	status=JK
YDR374C	YDR374C		0.99203	0.033	1.00868	0.17	-0.01104	0.033	0.00038	status=JK
YDR375C	BCS1		0.79872	0.037	0.84948	0.003	-0.05314	0.037	3e-05
YDR378C	LSM6		0.6698	0.027	0.72348	0.034	-0.05189	0.026	2e-05
YDR379W	RGA2		1.02861	0.034	1.02346	0.033	0.00609	0.034	1e-05
YDR380W	ARO10		0.95431	0.008	0.90945	0.005	0.04358	0.008	0
YDR382W	RPP2B		1.07105	0.043	1.08017	0.077	-0.0083	0.043	2e-05
YDR383C	NKP1		0.84197	0.051	0.87149	0.019	-0.02756	0.051	6e-05
YDR384C	ATO3		0.99629	0.038	1.02105	0.093	-0.04902	0.038	2e-05
YDR385W	EFT2		0.90406	0.065	0.89464	0.025	0.00907	0.065	0.0001
YDR386W	MUS81		0.97784	0.066	1.02004	0.028	-0.05657	0.066	8e-05
YDR387C	YDR387C		1.05068	0.019	1.04937	0.021	-0.00232	0.019	0
YDR388W	RVS167		0.74013	0.035	0.7976	0.031	-0.06157	0.034	3e-05
YDR389W	SAC7		0.93127	0.013	0.92201	0.098	0.00733	0.013	0
YDR391C	YDR391C		1.0512	0.026	1.07367	0.048	-0.02454	0.026	0
YDR392W	SPT3		0.75376	0.026	0.76378	0.032	-0.00985	0.026	1e-05
YDR393W	SHE9		0.77333	0.004	0.78711	0.037	-0.00476	0.004	1e-05	status=JK
YDR395W	SXM1		1.11239	0.022	1.05819	0.098	0.03571	0.022	0
YDR399W	HPT1		1.01621	0.025	0.98598	0.057	0.02948	0.024	0.00019	status=JK
YDR400W	URH1		0.99906	0.035	1.04216	0.078	-0.02782	0.035	1e-05
YDR401W	YDR401W		1.07982	0.055	1.10961	0.102	-0.00804	0.054	4e-05
YDR402C	DIT2		1.06154	0.079	1.08405	0.075	-0.02694	0.079	0.00011
YDR403W	DIT1		0.97113	0.044	0.99111	0.056	-0.02992	0.044	3e-05
YDR406W	PDR15		1.03897	0.016	0.93266	0.103	0.12542	0.016	8e-05	status=JK
YDR408C	ADE8		1.03687	0.045	1.10663	0.018	-0.06146	0.045	2e-05
YDR409W	SIZ1		0.99913	0.037	1.01418	0.009	-0.01433	0.037	1e-05
YDR410C	STE14		0	0	0	0	0	0	#NUM!
YDR411C	DFM1		0.99945	0.064	0.99932	0.032	-0.00291	0.064	7e-05
YDR414C	ERD1		0.91575	0.046	1.00187	0.036	-0.06887	0.046	3e-05
YDR415C	YDR415C		0.98787	0.08	0.91991	0.095	0.06572	0.08	0.00014
YDR419W	RAD30		0.96825	0.028	0.89593	0.129	0.07573	0.028	1e-05
YDR420W	HKR1		0.96339	0.027	0.90948	0.113	0.04173	0.027	1e-05
YDR421W	ARO80		0.99459	0.036	0.91732	0.147	0.0835	0.036	1e-05
YDR422C	SIP1		1.01976	0.046	1.09574	0.073	-0.07285	0.046	3e-05
YDR423C	CAD1		1.06535	0.087	0.98803	0.112	0.07067	0.087	0.00015
YDR424C	DYN2		0.91141	0.045	0.95242	0.108	-0.02629	0.044	3e-05
YDR425W	SNX41		0.83856	0.079	0.84956	0.054	-0.01906	0.079	0.00023
YDR426C	YDR426C		0.93242	0.015	0.93905	0.038	-0.00906	0.015	0
YDR428C	BNA7		1.03403	0.028	1.02412	0.032	0.00674	0.028	1e-05
YDR430C	CYM1		1.07207	0.054	1.0734	0.008	-0.0043	0.054	3e-05
YDR431W	YDR431W		0.89148	0.043	0.89802	0.016	-0.00609	0.043	3e-05
YDR435C	PPM1		1.08525	0.026	1.09674	0.053	-0.00768	0.026	0
YDR436W	PPZ2		1.17323	0.055	1.13069	0.043	0.04743	0.055	3e-05
YDR438W	THI74		1.01865	0.013	1.01458	0.008	0.00471	0.013	6e-05	status=JK
YDR439W	LRS4		1.12223	0.071	1.15196	0.027	-0.03303	0.07	7e-05
YDR440W	DOT1		1.07153	0.075	1.03099	0.09	0.03639	0.075	9e-05
YDR441C	APT2		0.98634	0.044	0.96563	0.056	0.00946	0.044	2e-05
YDR444W	YDR444W		1.12748	0.102	1.13899	0.011	-0.00938	0.102	0.0002
YDR445C	YDR445C		1.0225	0.015	1.00753	0.034	0.00744	0.015	7e-05	status=JK
YDR446W	ECM11		1.03674	0.015	1.00144	0.026	0.03028	0.015	0
YDR447C	RPS17B		0.98501	0.044	1.03277	0.036	-0.03951	0.044	2e-05
YDR451C	YHP1		1.01546	0.035	1.0009	0.029	0.01464	0.035	1e-05
YDR452W	PPN1		1.0802	0.092	1.0844	0.061	-0.00545	0.092	0.00017
YDR453C	TSA2		1.01099	0.024	0.99701	0.048	0.01858	0.024	0
YDR455C	YDR455C		0.96225	0.143	0.95907	0.084	0.00466	0.143	0.0009
YDR458C	HEH2		0.98606	0.03	1.01171	0.057	-0.01422	0.03	1e-05
YDR459C	PFA5		0.91136	0.076	0.92233	0.019	-0.01589	0.076	0.00016
YDR461W	MFA1		0.637	0.179	0.8775	0.146	-0.26734	0.179	0.00571
YDR463W	STP1		0.89722	0.122	0.96752	0.075	-0.07054	0.122	0.00069
YDR465C	RMT2		1.14515	0.04	1.11546	0.011	0.0319	0.04	0.00041	status=JK
YDR466W	PKH3		0.95618	0.023	0.99629	0.038	-0.04121	0.023	0
YDR467C	YDR467C		1.06549	0.003	1.0713	0.026	-0.00681	0.003	0	status=JK
YDR469W	SDC1		0.91693	0.028	0.8837	0.018	0.03401	0.028	0.00031	status=JK
YDR471W	RPL27B		0.80022	0.068	0.86664	0.001	-0.06595	0.068	0.00017
YDR474C	YDR474C		1.08852	0.024	0.99969	0.05	0.08859	0.024	0.00017	status=JK
YDR475C	JIP4		0.98127	0.006	0.98279	0.028	-0.01024	0.006	1e-05	status=JK
YDR476C	YDR476C		0.95938	0.137	0.93085	0.041	0.02461	0.137	0.00079
YDR477W	SNF1		0.79501	0.046	0.93313	0.043	-0.12038	0.046	5e-05
YDR479C	PEX29		1.00761	0.054	0.99933	0.038	0.01934	0.053	4e-05
YDR480W	DIG2		1.09128	0.052	1.11955	0.078	-0.01712	0.052	3e-05
YDR481C	PHO8		1.03093	0.117	1.01826	0.079	0.02991	0.117	0.0004
YDR482C	CWC21		0.9568	0.082	0.99963	0.102	-0.04584	0.081	0.00017
YDR483W	KRE2		1.05906	0.035	1.03668	0.044	0.03139	0.035	1e-05
YDR483W	KRE2		1.0263	0.092	1.05578	0.044	-0.00853	0.092	0.0002
YDR485C	VPS72		0.85614	0.063	0.84867	0.043	0.01439	0.063	0.00011
YDR486C	VPS60		0.94543	0.018	0.92972	0.015	0.0165	0.018	0.00012	status=JK
YDR488C	PAC11		0.99519	0.031	0.89814	0.025	0.09427	0.031	1e-05
YDR490C	PKH1		1.02809	0.081	1.06989	0.072	-0.05447	0.081	0.00014
YDR491C	YDR491C		1.00886	0.122	1.01552	0.047	-0.00422	0.122	0.00048
YDR492W	IZH1		1.08575	0.189	1.07103	0.036	0.0242	0.188	0.00141
YDR493W	MZM1		0.9782	0.026	0.89573	0.163	0.06419	0.026	0.00024	status=JK
YDR494W	RSM28		1.06015	0.047	1.0056	0.061	0.0586	0.047	2e-05
YDR496C	PUF6		0.76913	0.031	0.77163	0.033	-0.01101	0.031	2e-05
YDR497C	ITR1		1.04309	0.028	1.08302	0.036	-0.04703	0.028	1e-05
YDR500C	RPL37B		0	0	0	0	0	0	#NUM!
YDR501W	PLM2		1.17143	0.06	1.11882	0.039	0.06031	0.06	4e-05
YDR502C	SAM2		1.03928	0.076	0.9898	0.098	0.04281	0.076	0.00177	status=JK
YDR503C	LPP1		1.04283	0.068	1.03797	0.027	0.00011	0.068	8e-05
YDR504C	SPG3		0.99004	0.026	0.96681	0.029	0.01828	0.026	0
YDR505C	PSP1		0.883	0.144	0.93404	0.06	-0.0316	0.144	0.00117
YDR506C	GMC1		1.01169	0.081	1.00269	0.042	0.01229	0.081	0.00014
YDR508C	GNP1		1.05223	0.046	0.97758	0.087	0.06045	0.046	0.00064	status=JK
YDR509W	YDR509W		0.83867	0.114	0.93105	0.036	-0.08762	0.114	0.00069
YDR511W	ACN9		1.06685	0.046	1.04492	0.062	0.02182	0.045	2e-05
YDR512C	EMI1		0.7261	0.086	0.73516	0.021	-0.01096	0.086	0.00045
YDR513W	GRX2		1.01567	0.039	1.06846	0.029	-0.05855	0.039	2e-05
YDR514C	YDR514C		0.44991	0.226	0.45772	0.329	0.03574	0.225	0.02826
YDR515W	SLF1		1.08284	0.047	1.0392	0.098	0.01859	0.047	2e-05
YDR516C	EMI2		1.00736	0.011	1.03153	0.061	-0.01799	0.011	4e-05	status=JK
YDR517W	GRH1		1.01511	0.041	1.02231	0.035	-0.01414	0.04	2e-05
YDR519W	FPR2		1.03605	0.063	0.98096	0.035	0.06262	0.063	6e-05
YDR520C	URC2		1.09843	0.015	1.04174	0.016	0.05052	0.015	6e-05	status=JK
YDR522C	SPS2		1.05116	0.023	0.99878	0.056	0.04976	0.023	0.00016	status=JK
YDR524C	AGE1		0.84828	0.247	0.95193	0.103	-0.09699	0.246	0.00631
YDR525W	YDR525W		0.98424	0.073	0.97385	0.042	0.00042	0.072	0.00011
YDR525W-A	SNA2		0.9737	0.03	1.01081	0.038	-0.03943	0.03	0.00032	status=JK
YDR528W	HLR1		1.08415	0.105	1.08685	0.042	0.00779	0.105	0.00025
YDR530C	APA2		1.12831	0.087	1.01853	0.019	0.11086	0.087	0.00013
YDR532C	KRE28		0.3171	0.021	0.28014	0.047	0.04057	0.021	0.00143	status=JK
YDR533C	HSP31		1.13549	0.032	0.99321	0.011	0.14133	0.032	1e-05
YDR534C	FIT1		1.07236	0.005	0.95273	0.014	0.11484	0.005	1e-05	status=JK
YDR535C	YDR535C		0.90538	0.164	1.0031	0.016	-0.10573	0.164	0.0016
YDR536W	STL1		0.9232	0.203	0.99933	0.029	-0.07481	0.203	0.00282
YDR537C	YDR537C		0.78561	0.069	0.97328	0.004	-0.18905	0.069	0.00018
YDR538W	PAD1		0.82581	0.125	0.8028	0.078	0.03441	0.124	0.00093
YDR539W	FDC1		0.99637	0.191	0.92709	0.113	0.07724	0.19	0.00187
YDR540C	IRC4		1.0008	0.124	1.04901	0.026	-0.03568	0.124	0.00052
YDR541C	YDR541C		0.98724	0.064	1.00028	0.043	-0.02148	0.063	7e-05
YEL001C	IRC22		#NUM!	#NUM!	#NUM!	#NUM!	#NUM!	#NUM!	#NUM!	status=LK
YEL003W	GIM4		#NUM!	#NUM!	#NUM!	#NUM!	#NUM!	#NUM!	#NUM!	status=LK
YEL004W	YEA4		#NUM!	#NUM!	#NUM!	#NUM!	#NUM!	#NUM!	#NUM!	status=LK
YEL005C	VAB2		#NUM!	#NUM!	#NUM!	#NUM!	#NUM!	#NUM!	#NUM!	status=LK
YEL006W	YEA6		#NUM!	#NUM!	#NUM!	#NUM!	#NUM!	#NUM!	#NUM!	status=LK
YEL007W	MIT1		#NUM!	#NUM!	#NUM!	#NUM!	#NUM!	#NUM!	#NUM!	status=LK
YEL008W	YEL008W		#NUM!	#NUM!	#NUM!	#NUM!	#NUM!	#NUM!	#NUM!	status=LK
YEL010W	YEL010W		#NUM!	#NUM!	#NUM!	#NUM!	#NUM!	#NUM!	#NUM!	status=LK
YEL011W	GLC3		#NUM!	#NUM!	#NUM!	#NUM!	#NUM!	#NUM!	#NUM!	status=LK
YEL012W	UBC8		#NUM!	#NUM!	#NUM!	#NUM!	#NUM!	#NUM!	#NUM!	status=LK
YEL013W	VAC8		#NUM!	#NUM!	#NUM!	#NUM!	#NUM!	#NUM!	#NUM!	status=LK
YEL014C	YEL014C		#NUM!	#NUM!	#NUM!	#NUM!	#NUM!	#NUM!	#NUM!	status=LK
YEL015W	EDC3		#NUM!	#NUM!	#NUM!	#NUM!	#NUM!	#NUM!	#NUM!	status=LK
YEL016C	NPP2		#NUM!	#NUM!	#NUM!	#NUM!	#NUM!	#NUM!	#NUM!	status=LK
YEL017C-A	PMP2		#NUM!	#NUM!	#NUM!	#NUM!	#NUM!	#NUM!	#NUM!	status=LK
YEL017W	GTT3		#NUM!	#NUM!	#NUM!	#NUM!	#NUM!	#NUM!	#NUM!	status=LK
YEL020C	YEL020C		#NUM!	#NUM!	#NUM!	#NUM!	#NUM!	#NUM!	#NUM!	status=LK
YEL023C	YEL023C		#NUM!	#NUM!	#NUM!	#NUM!	#NUM!	#NUM!	#NUM!	status=LK
YEL025C	YEL025C		#NUM!	#NUM!	#NUM!	#NUM!	#NUM!	#NUM!	#NUM!	status=LK
YEL028W	YEL028W		#NUM!	#NUM!	#NUM!	#NUM!	#NUM!	#NUM!	#NUM!	status=LK
YEL030W	ECM10		#NUM!	#NUM!	#NUM!	#NUM!	#NUM!	#NUM!	#NUM!	status=LK
YEL031W	SPF1		#NUM!	#NUM!	#NUM!	#NUM!	#NUM!	#NUM!	#NUM!	status=LK
YEL033W	MTC7		#NUM!	#NUM!	#NUM!	#NUM!	#NUM!	#NUM!	#NUM!	status=LK
YEL037C	RAD23		#NUM!	#NUM!	#NUM!	#NUM!	#NUM!	#NUM!	#NUM!	status=LK
YEL038W	UTR4		#NUM!	#NUM!	#NUM!	#NUM!	#NUM!	#NUM!	#NUM!	status=LK
YEL039C	CYC7		#NUM!	#NUM!	#NUM!	#NUM!	#NUM!	#NUM!	#NUM!	status=LK
YEL040W	UTR2		#NUM!	#NUM!	#NUM!	#NUM!	#NUM!	#NUM!	#NUM!	status=LK
YEL041W	YEF1		#NUM!	#NUM!	#NUM!	#NUM!	#NUM!	#NUM!	#NUM!	status=LK
YEL042W	GDA1		#NUM!	#NUM!	#NUM!	#NUM!	#NUM!	#NUM!	#NUM!	status=LK
YEL043W	YEL043W		#NUM!	#NUM!	#NUM!	#NUM!	#NUM!	#NUM!	#NUM!	status=LK
YEL047C	FRD1		#NUM!	#NUM!	#NUM!	#NUM!	#NUM!	#NUM!	#NUM!	status=LK
YEL048C	TCA17		#NUM!	#NUM!	#NUM!	#NUM!	#NUM!	#NUM!	#NUM!	status=LK
YEL049W	PAU2		#NUM!	#NUM!	#NUM!	#NUM!	#NUM!	#NUM!	#NUM!	status=LK
YEL052W	AFG1		#NUM!	#NUM!	#NUM!	#NUM!	#NUM!	#NUM!	#NUM!	status=LK
YEL053C	MAK10		#NUM!	#NUM!	#NUM!	#NUM!	#NUM!	#NUM!	#NUM!	status=LK
YEL056W	HAT2		#NUM!	#NUM!	#NUM!	#NUM!	#NUM!	#NUM!	#NUM!	status=LK
YEL057C	YEL057C		#NUM!	#NUM!	#NUM!	#NUM!	#NUM!	#NUM!	#NUM!	status=LK
YEL059W	YEL059W		#NUM!	#NUM!	#NUM!	#NUM!	#NUM!	#NUM!	#NUM!	status=LK
YEL060C	PRB1		#NUM!	#NUM!	#NUM!	#NUM!	#NUM!	#NUM!	#NUM!	status=LK
YEL061C	CIN8		#NUM!	#NUM!	#NUM!	#NUM!	#NUM!	#NUM!	#NUM!	status=LK
YEL062W	NPR2		#NUM!	#NUM!	#NUM!	#NUM!	#NUM!	#NUM!	#NUM!	status=LK
YEL063C	CAN1		#NUM!	#NUM!	#NUM!	#NUM!	#NUM!	#NUM!	#NUM!	status=LK
YEL064C	AVT2		#NUM!	#NUM!	#NUM!	#NUM!	#NUM!	#NUM!	#NUM!	status=LK
YEL065W	SIT1		#NUM!	#NUM!	#NUM!	#NUM!	#NUM!	#NUM!	#NUM!	status=LK
YEL066W	HPA3		#NUM!	#NUM!	#NUM!	#NUM!	#NUM!	#NUM!	#NUM!	status=LK
YEL067C	YEL067C		#NUM!	#NUM!	#NUM!	#NUM!	#NUM!	#NUM!	#NUM!	status=LK
YEL068C	YEL068C		#NUM!	#NUM!	#NUM!	#NUM!	#NUM!	#NUM!	#NUM!	status=LK
YEL071W	DLD3		#NUM!	#NUM!	#NUM!	#NUM!	#NUM!	#NUM!	#NUM!	status=LK
YER001W	MNN1		#NUM!	#NUM!	#NUM!	#NUM!	#NUM!	#NUM!	#NUM!	status=LK
YER002W	NOP16		#NUM!	#NUM!	#NUM!	#NUM!	#NUM!	#NUM!	#NUM!	status=LK
YER004W	FMP52		#NUM!	#NUM!	#NUM!	#NUM!	#NUM!	#NUM!	#NUM!	status=LK
YER005W	YND1		#NUM!	#NUM!	#NUM!	#NUM!	#NUM!	#NUM!	#NUM!	status=LK
YER007C-A	TMA20		#NUM!	#NUM!	#NUM!	#NUM!	#NUM!	#NUM!	#NUM!	status=LK
YER007W	PAC2		#NUM!	#NUM!	#NUM!	#NUM!	#NUM!	#NUM!	#NUM!	status=LK
YER010C	YER010C		#NUM!	#NUM!	#NUM!	#NUM!	#NUM!	#NUM!	#NUM!	status=LK
YER011W	TIR1		#NUM!	#NUM!	#NUM!	#NUM!	#NUM!	#NUM!	#NUM!	status=LK
YER016W	BIM1		#NUM!	#NUM!	#NUM!	#NUM!	#NUM!	#NUM!	#NUM!	status=LK
YER019C-A	SBH2		#NUM!	#NUM!	#NUM!	#NUM!	#NUM!	#NUM!	#NUM!	status=LK
YER019W	ISC1		#NUM!	#NUM!	#NUM!	#NUM!	#NUM!	#NUM!	#NUM!	status=LK
YER020W	GPA2		#NUM!	#NUM!	#NUM!	#NUM!	#NUM!	#NUM!	#NUM!	status=LK
YER024W	YAT2		#NUM!	#NUM!	#NUM!	#NUM!	#NUM!	#NUM!	#NUM!	status=LK
YER027C	GAL83		#NUM!	#NUM!	#NUM!	#NUM!	#NUM!	#NUM!	#NUM!	status=LK
YER028C	MIG3		#NUM!	#NUM!	#NUM!	#NUM!	#NUM!	#NUM!	#NUM!	status=LK
YER030W	CHZ1		#NUM!	#NUM!	#NUM!	#NUM!	#NUM!	#NUM!	#NUM!	status=LK
YER031C	YPT31		#NUM!	#NUM!	#NUM!	#NUM!	#NUM!	#NUM!	#NUM!	status=LK
YER032W	FIR1		#NUM!	#NUM!	#NUM!	#NUM!	#NUM!	#NUM!	#NUM!	status=LK
YER033C	ZRG8		#NUM!	#NUM!	#NUM!	#NUM!	#NUM!	#NUM!	#NUM!	status=LK
YER034W	YER034W		#NUM!	#NUM!	#NUM!	#NUM!	#NUM!	#NUM!	#NUM!	status=LK
YER035W	EDC2		#NUM!	#NUM!	#NUM!	#NUM!	#NUM!	#NUM!	#NUM!	status=LK
YER038W-A	YER038W-A		#NUM!	#NUM!	#NUM!	#NUM!	#NUM!	#NUM!	#NUM!	status=LK
YER039C	HVG1		#NUM!	#NUM!	#NUM!	#NUM!	#NUM!	#NUM!	#NUM!	status=LK
YER039C-A	YER039C-A		#NUM!	#NUM!	#NUM!	#NUM!	#NUM!	#NUM!	#NUM!	status=LK
YER041W	YEN1		0.8808	0.172	0.99218	0.074	-0.11432	0.172	0.00199
YER042W	MXR1		0.99919	0.11	0.99762	0.008	0.00162	0.11	0.00036
YER044C-A	MEI4		0.80422	0.067	0.89496	0.041	-0.09895	0.067	0.00016
YER045C	ACA1		0.96957	0.186	1.02823	0.056	-0.05921	0.186	0.00188
YER046W	SPO73		1.00739	0.224	1.03474	0.021	-0.02181	0.223	0.00288
YER046W-A	YER046W-A		0.88382	0.111	0.87081	0.027	0.01966	0.11	0.00053
YER047C	SAP1		0.98726	0.097	0.85555	0.019	0.13605	0.097	0.00026
YER048C	CAJ1		0.97483	0.087	1.01458	0.034	-0.03478	0.087	0.0002
YER049W	TPA1		0.94018	0.011	1.00454	0.045	-0.06768	0.011	4e-05	status=JK
YER051W	JHD1		1.06224	0.021	1.13469	0.021	-0.06539	0.021	0
YER052C	HOM3		1.04234	0.087	1.01287	0.004	0.03163	0.087	0.00016
YER053C	PIC2		1.09785	0.078	1.12775	0.05	-0.02325	0.077	0.0001
YER054C	GIP2		1.06042	0.097	1.11792	0.031	-0.05474	0.097	0.00021
YER055C	HIS1		0.56962	0.046	0.47733	0.105	0.09773	0.045	0.00014
YER056C	FCY2		1.04879	0.075	1.02791	0.012	0.01542	0.075	0.0001
YER056C-A	RPL34A		0.94745	0.021	0.85248	0.02	0.09063	0.021	0.00016	status=JK
YER057C	HMF1		0.95432	0.028	1.09975	0.034	-0.14713	0.028	1e-05
YER059W	PCL6		1.02159	0.097	0.993	0.075	0.04038	0.097	0.00024
YER060W	FCY21		1.0443	0.029	1.02753	0.034	0.01849	0.029	1e-05
YER060W-A	FCY22		1.00889	0.013	1.00429	0.032	-3e-05	0.013	6e-05	status=JK
YER061C	CEM1		0.84803	0.049	0.8607	0.027	-0.00381	0.049	5e-05
YER062C	HOR2		0.94405	0.122	1.05316	0.023	-0.10488	0.122	0.00059
YER063W	THO1		1.01249	0.059	0.99916	0.017	0.01383	0.059	6e-05
YER064C	VHR2		1.06371	0.042	1.00805	0.012	0.0572	0.042	2e-05
YER065C	ICL1		0.94833	0.014	0.9729	0.048	-0.02723	0.014	8e-05	status=JK
YER066C-A	YER066C-A		1.02492	0.005	1.0081	0.035	0.02309	0.004	1e-05	status=JK
YER066W	RRT13		1.02587	0.04	0.97711	0.007	0.05028	0.04	2e-05
YER067C-A	YER067C-A		0.98051	0.104	0.98783	0.034	-0.01228	0.104	0.00033
YER067W	RGI1		1.01999	0.043	0.96606	0.092	0.03747	0.043	2e-05
YER069W	ARG5		0.71908	0.005	0.67175	0.01	0.04934	0.005	2e-05	status=JK
YER071C	TDA2		0.99998	0.038	0.99537	0.015	0.00185	0.038	2e-05
YER072W	VTC1		1.04646	0.037	1.0425	0.026	4e-05	0.037	1e-05
YER073W	ALD5		1.04109	0.047	1.03725	0.024	0.01274	0.047	2e-05
YER074W	RPS24A		0.6073	0.095	0.6943	0.011	-0.09175	0.095	0.00104
YER075C	PTP3		0.97326	0.043	0.98414	0.047	-0.00364	0.043	2e-05
YER077C	YER077C		1.04541	0.043	1.02934	0.041	0.01237	0.043	2e-05
YER078C	ICP55		0.81425	0.195	0.89609	0.085	-0.07502	0.195	0.00362
YER079W	YER079W		1.00778	0.117	0.98622	0.033	0.02798	0.117	0.00043
YER080W	AIM9		1.02943	0.143	1.11476	0.035	-0.06512	0.143	0.00073
YER081W	SER3		0.96267	0.069	0.96753	0.103	-0.01562	0.069	0.0001
YER083C	GET2		0.93817	0.055	0.88022	0.023	0.05454	0.055	5e-05
YER084W	YER084W		1.10394	0.03	1.05076	0.009	0.05602	0.03	1e-05
YER085C	YER085C		1.05995	0.008	1.10632	0.049	-0.03372	0.008	0
YER087C-A	YER087C-A		1.09896	0.043	1.07162	0.003	0.02905	0.043	2e-05
YER088C	DOT6		0.99655	0.06	1.00755	0.007	-0.01313	0.06	6e-05
YER089C	PTC2		0.93537	0.037	1.00258	0.028	-0.05588	0.037	2e-05
YER090W	TRP2		1.04997	0.16	1.0043	0.088	0.02633	0.16	0.00096
YER091C	MET6		0.98344	0.016	0.99293	0.005	-0.00897	0.016	9e-05	status=JK
YER091C-A	YER091C-A		1.00642	0.059	0.97288	0.051	0.04644	0.059	6e-05
YER092W	IES5		0.92297	0.042	0.91687	0.003	0.00658	0.042	3e-05
YER093C-A	AIM11		0.77517	0.04	0.71683	0.063	0.06041	0.04	4e-05
YER095W	RAD51		0.9766	0.016	0.96832	0.011	0.00887	0.016	9e-05	status=JK
YER096W	SHC1		0.87791	0.052	0.94753	0.063	-0.05492	0.052	6e-05
YER097W	YER097W		1.02634	0.006	1.05837	0.011	-0.03489	0.006	1e-05	status=JK
YER098W	UBP9		0.99245	0.023	0.95434	0.057	0.03624	0.023	0.00018	status=JK
YER101C	AST2		0.99205	0.066	1.01293	0.005	-0.01931	0.066	8e-05
YER106W	MAM1		0.98296	0.103	0.9932	0.065	-0.0377	0.103	0.00031
YER108C	YER108C		1.00998	0.236	1.04295	0.051	-0.02458	0.236	0.00335
YER109C	FLO8		0.98468	0.058	0.97194	0.042	0.00822	0.058	6e-05
YER111C	SWI4		0.94235	0.132	0.96107	0.013	-0.01288	0.132	0.00075
YER113C	TMN3		1.0623	0.086	1.04132	0.039	0.02862	0.086	0.00015
YER114C	BOI2		1.01766	0.03	1.02652	0.055	-0.01025	0.03	1e-05
YER115C	SPR6		1.10564	0.05	1.10995	0.076	-0.00507	0.05	3e-05
YER116C	SLX8		0.53845	0.061	0.49525	0.075	0.052	0.061	0.0004
YER117W	RPL23B		0.92239	0.006	0.92494	0.048	-0.00875	0.006	2e-05	status=JK
YER118C	SHO1		1.04201	0.049	0.99706	0.031	0.02849	0.049	3e-05
YER119C	AVT6		0.86301	0.222	0.98243	0.06	-0.11176	0.221	0.00442
YER119C-A	YER119C-A		0.90237	0.022	0.79524	0.034	0.11234	0.022	0.0002	status=JK
YER120W	SCS2		0.81274	0.145	0.74454	0.047	0.07325	0.144	0.00151
YER121W	YER121W		1.02728	0.087	0.97549	0.019	0.04465	0.087	0.00017
YER123W	YCK3		0.92997	0.024	0.93826	0.016	-0.01683	0.024	0.00022	status=JK
YER124C	DSE1		1.01913	0.033	0.97924	0.051	0.04087	0.033	1e-05
YER128W	VFA1		1.01509	0.037	1.02255	0.019	-0.00151	0.037	1e-05
YER129W	SAK1		0.99029	0.048	1.02442	0.023	-0.02791	0.048	3e-05
YER130C	YER130C		1.09519	0.052	1.07915	0.009	0.01222	0.052	3e-05
YER131W	RPS26B		0.7128	0.145	0.66797	0.084	0.05983	0.145	0.00225
YER132C	PMD1		0.94974	0.118	0.95779	0.088	-0.03149	0.118	0.00052
YER134C	YER134C		0.93603	0.215	0.92474	0.105	0.0119	0.214	0.00317
YER135C	YER135C		0.92067	0.127	0.93161	0.158	-0.05695	0.127	0.00071
YER137C	YER137C		0.92045	0.029	1.05901	0.075	-0.13152	0.029	0.00032	status=JK
YER139C	RTR1		0.98009	0.192	0.9544	0.138	-0.01031	0.192	0.00201
YER140W	YER140W		1.04689	0.151	1.04051	0.06	0.01994	0.151	0.00081
YER142C	MAG1		1.00075	0.015	1.02011	0.047	-0.02196	0.015	8e-05	status=JK
YER143W	DDI1		1.05436	0.05	0.99876	0.01	0.05728	0.05	3e-05
YER144C	UBP5		1.06585	0.09	1.03214	0.043	0.04409	0.09	0.00016
YER145C	FTR1		0.92228	0.067	0.97467	0.003	-0.052	0.067	0.0001
YER149C	PEA2		1.04498	0.055	1.00486	0.069	0.02367	0.055	4e-05
YER150W	SPI1		1.02371	0.032	1.06691	0.014	-0.04186	0.032	1e-05
YER151C	UBP3		0.8216	0.025	0.83593	0.021	-0.01852	0.025	1e-05
YER152C	YER152C		1.08188	0.022	1.07097	0.024	0.01655	0.022	0
YER153C	PET122		0.75309	0.128	0.85883	0.02	-0.11209	0.127	0.00131
YER155C	BEM2		0.93682	0.062	0.96609	0.039	-0.02243	0.062	8e-05
YER156C	YER156C		0.8502	0.07	0.94348	0.008	-0.0957	0.07	0.00015
YER158C	YER158C		1.21174	0.053	1.17095	0.061	0.05819	0.053	2e-05
YER161C	SPT2		0.98124	0.053	0.95773	0.068	0.02311	0.053	4e-05
YER162C	RAD4		0.62222	0.148	0.57563	0.174	0.08807	0.148	0.00354
YER163C	GCG1		1.03597	0.012	1.00885	0.034	0.02916	0.012	5e-05	status=JK
YER164W	CHD1		1.03623	0.027	0.99974	0.038	0.03898	0.027	0.00022	status=JK
YER166W	DNF1		0.9337	0.057	0.9435	0.08	0.00778	0.057	6e-05
YER167W	BCK2		1.04941	0.017	0.99946	0.024	0.05071	0.017	0
YER170W	ADK2		1.02668	0.019	1.02362	0.013	0.00233	0.019	0
YER173W	RAD24		1.10666	0.104	1.03234	0.012	0.07497	0.103	0.00023
YER174C	GRX4		1.04729	0.02	0.9887	0.004	0.06045	0.02	0.00012	status=JK
YER175C	TMT1		0.94619	0.033	0.93757	0.043	0.0027	0.033	1e-05
YER176W	ECM32		1.00045	0.015	0.97992	0.045	0.01837	0.015	8e-05	status=JK
YER177W	BMH1		0.78325	0.126	0.76489	0.113	0.01647	0.126	0.00113
YER178W	PDA1		0.79684	0.138	0.8016	0.077	-0.01684	0.138	0.0014
YER179W	DMC1		0.9866	0.032	0.95797	0.039	0.01825	0.032	1e-05
YER180C	ISC10		0.99814	0.039	0.99937	0.026	0.0022	0.039	2e-05
YER181C	YER181C		1.00622	0.011	1.02006	0.031	-0.01465	0.011	4e-05	status=JK
YER182W	FMP10		1.03441	0.018	1.00006	0.03	0.03574	0.018	0
YER183C	FAU1		1.01462	0.072	1.03195	0.012	-0.01305	0.072	0.0001
YER184C	YER184C		0.99791	0.097	1.07009	0.009	-0.07195	0.097	0.00025
YER185W	PUG1		0.9598	0.203	1.03252	0.003	-0.07338	0.202	0.00249
YER186C	YER186C		1.10518	0.057	0.9997	0.009	0.1017	0.057	4e-05
YER187W	YER187W		1.08508	0.069	1.08496	0.034	-0.00165	0.069	7e-05
YER188W	YER188W		1.02672	0.055	1.02698	0.015	0.00452	0.054	4e-05
YFL001W	DEG1		0.6993	0.005	0.73338	0.008	-0.0352	0.005	2e-05	status=JK
YFL003C	MSH4		1.1856	0.013	1.08345	0.034	0.09484	0.013	4e-05	status=JK
YFL004W	VTC2		1.07805	0.057	1.04354	0.013	0.03959	0.057	4e-05
YFL006W	YFL006W		0.89269	0.171	0.96741	0.09	-0.09717	0.17	0.00186
YFL007W	BLM10		0.98415	0.042	0.92862	0.005	0.05815	0.042	2e-05
YFL010C	WWM1		0.05437	0.063	0.99654	0.12	-0.9508	0.063	0.27566	status=JK
YFL010W-A	AUA1		1.04424	0.049	1.09304	0.041	-0.04475	0.049	3e-05
YFL011W	HXT10		1.01188	0.029	1.00313	0.041	0.01443	0.029	0.00027	status=JK
YFL012W	YFL012W		0.98286	0.03	0.98659	0.006	-0.00404	0.03	1e-05
YFL013C	IES1		0.97356	0.004	0.96703	0.082	0.01575	0.004	1e-05	status=JK
YFL013W-A	YFL013W-A		0.90601	0.058	0.89729	0.057	0.01726	0.058	7e-05
YFL014W	HSP12		0.96501	0.006	1.00665	0.064	-0.02663	0.006	1e-05	status=JK
YFL015C	YFL015C		1.00519	0.197	1.07982	0.061	-0.10722	0.196	0.002
YFL018C	LPD1		0.94823	0.204	0.99187	0.006	-0.04394	0.204	0.00264
YFL019C	YFL019C		0.97458	0.072	1.00384	0.017	-0.02583	0.071	0.00011
YFL020C	PAU5		1.02281	0.087	1.02367	0.016	-0.00411	0.087	0.00017
YFL021W	GAT1		1.06244	0.042	1.06308	0.072	0.01845	0.042	2e-05
YFL023W	BUD27		0.72469	0.037	0.82046	0.005	-0.09271	0.037	0.00088	status=JK
YFL025C	BST1		1.02555	0.057	1.01799	0.082	-0.01193	0.057	5e-05
YFL026W	STE2		0	0	0	0	0	0	#NUM!
YFL027C	GYP8		1.03909	0.012	1.00043	0.034	0.04876	0.012	5e-05	status=JK
YFL028C	CAF16		1.0613	0.035	1.03706	0.005	0.02709	0.035	1e-05
YFL030W	AGX1		0.98658	0.03	0.93605	0.045	0.05933	0.03	1e-05
YFL031W	HAC1		0.91544	0.067	0.95381	0.061	-0.04225	0.067	0.00011
YFL032W	YFL032W		1.03019	0.056	1.03512	0.045	-0.00883	0.056	4e-05
YFL033C	RIM15		1.0819	0.05	1.02974	0.079	0.05022	0.05	3e-05
YFL034C-A	RPL22B		1.08303	0.071	1.10301	0.068	-0.05588	0.071	8e-05
YFL034W	YFL034W		1.01073	0.096	1.03988	0.031	-0.02123	0.096	0.00023
YFL035C-B	YFL035C-B		1.05613	0.015	1.03856	0.041	0.02815	0.015	0
YFL036W	RPO41		0.64435	0.09	0.64149	0.081	-0.01408	0.09	0.00075
YFL040W	YFL040W		0.99758	0.099	0.9985	0.05	0.00789	0.099	0.00027
YFL041W	FET5		1.05469	0.011	1.05403	0.061	-0.01243	0.011	0
YFL042C	YFL042C		1.06114	0.048	1.06557	0.013	-0.00753	0.048	3e-05
YFL043C	YFL043C		1.01518	0.034	0.98858	0.046	0.02686	0.034	1e-05
YFL044C	OTU1		1.05095	0.027	1.05494	0.018	-0.0029	0.026	0
YFL046W	FMP32		1.0517	0.019	1.01758	0.043	0.0286	0.019	0.00011	status=JK
YFL047W	RGD2		1.0288	0.02	0.9457	0.12	0.10896	0.02	0.00012	status=JK
YFL048C	EMP47		1.05138	0.049	1.11428	0.049	-0.05962	0.049	0.00072	status=JK
YFL049W	SWP82		1.02987	0.241	1.01332	0.14	0.00947	0.241	0.00338
YFL050C	ALR2		1.08436	0.051	1.0535	0.028	0.02818	0.051	0.00074	status=JK
YFL051C	YFL051C		0.88449	0.128	0.93381	0.082	-0.04551	0.128	0.00083
YFL052W	YFL052W		1.02275	0.087	1.04685	0.022	-0.01805	0.087	0.00017
YFL053W	DAK2		1.05325	0.063	1.04906	0.024	0.00518	0.063	6e-05
YFL054C	YFL054C		1.03565	0.108	1.06752	0.036	-0.02327	0.107	0.00031
YFL055W	AGP3		1.02895	0.049	1.05768	0.028	-0.02318	0.049	3e-05
YFL056C	AAD6		1.03129	0.025	0.95329	0.104	0.09134	0.025	0
YFL063W	YFL063W		1.09894	0.034	1.14372	0.036	-0.05593	0.034	1e-05
YFR006W	YFR006W		1.04572	0.051	1.05185	0.035	-0.00174	0.051	3e-05
YFR007W	YFH7		0.94625	0.124	0.96295	0.018	-0.01606	0.124	0.00061
YFR008W	FAR7		1.04013	0.019	0.93336	0.041	0.10514	0.019	0
YFR009W	GCN20		1.00738	0.127	0.97938	0.046	0.02876	0.127	0.00055
YFR010W	UBP6		0.69788	0.154	0.74375	0.057	-0.04934	0.154	0.00285
YFR011C	AIM13		0.90902	0.18	0.91724	0.032	0.006	0.18	0.00207
YFR012W	DCV1		0.98183	0.043	0.94428	0.126	0.05474	0.042	2e-05
YFR013W	IOC3		0.94158	0.062	0.92606	0.066	0.02665	0.062	8e-05
YFR014C	CMK1		1.0033	0.026	0.99565	0.078	0.01159	0.026	0
YFR015C	GSY1		1.05007	0.013	1.06313	0.008	-0.01217	0.013	5e-05	status=JK
YFR016C	YFR016C		1.09249	0.016	1.07685	0.032	0.0142	0.016	8e-05	status=JK
YFR017C	IGD1		1.00982	0.049	1.04044	0.019	-0.03008	0.048	3e-05
YFR018C	YFR018C		1.06814	0.04	1.09401	0.035	-0.01621	0.04	1e-05
YFR019W	FAB1		0.63386	0.091	0.69879	0.035	-0.05405	0.091	0.00081
YFR020W	YFR020W		1.09937	0.013	1.08268	0.08	0.02233	0.013	5e-05	status=JK
YFR021W	ATG18		0.8894	0.04	0.90263	0.042	-0.00429	0.04	2e-05
YFR022W	ROG3		1.0459	0.039	1.0644	0.038	-0.01657	0.039	1e-05
YFR023W	PES4		1.02782	0.049	1.02861	0.04	0.00144	0.049	3e-05
YFR024C	YFR024C		0.98652	0.057	1.03086	0.019	-0.03573	0.057	5e-05
YFR024C-A	LSB3		1.09288	0.022	1.06998	0.04	0.01755	0.022	0
YFR025C	HIS2		0.60143	0.024	0.61793	0.02	-0.01551	0.024	2e-05
YFR026C	ULI1		1.00377	0.028	0.98987	0.002	0.01625	0.028	1e-05
YFR030W	MET10		0.997	0.02	0.98441	0.036	0.01823	0.02	0
YFR031C-A	RPL2A		0.95237	0.068	0.92862	0.014	0.02133	0.068	0.0001
YFR032C	RRT5		1.04027	0.022	1.06698	0.066	-0.01827	0.022	0.00015	status=JK
YFR032C-A	RPL29		0.9401	0.04	0.92216	0.007	0.01589	0.04	2e-05
YFR033C	QCR6		0.92438	0.014	0.92938	0.032	-0.01164	0.014	8e-05	status=JK
YFR034C	PHO4		0.97766	0.075	0.95755	0.035	0.02037	0.075	0.00012
YFR035C	YFR035C		1.00451	0.007	1.04365	0.056	-0.02808	0.007	2e-05	status=JK
YFR038W	IRC5		1.02117	0.038	1.03129	0.023	0.00431	0.037	1e-05
YFR039C	YFR039C		0.99324	0.006	1.01636	0.008	-0.02027	0.006	1e-05	status=JK
YFR040W	SAP155		0.9008	0.068	0.88899	0.061	0.00159	0.068	0.00012
YFR041C	ERJ5		1.02314	0.033	0.98896	0.012	0.04231	0.033	0.00034	status=JK
YFR043C	IRC6		1.0858	0.073	1.10134	0.026	-0.01129	0.073	8e-05
YFR044C	DUG1		1.02174	0.068	1.03436	0.066	0.00914	0.068	8e-05
YFR045W	YFR045W		0.97972	0.066	1.04314	0.008	-0.06073	0.065	8e-05
YFR046C	CNN1		1.13118	0.047	1.08804	0.035	0.04006	0.047	0.00058	status=JK
YFR047C	BNA6		1.01168	0.082	0.9909	0.01	0.02763	0.082	0.00015
YFR048W	RMD8		1.01929	0.04	1.04836	0.017	-0.02692	0.039	2e-05
YFR049W	YMR31		1.01479	0.056	1.02497	0.062	-0.02283	0.055	5e-05
YFR053C	HXK1		0.93017	0.085	0.99031	0.029	-0.06331	0.085	0.00021
YFR054C	YFR054C		1.04531	0.072	1.01377	0.078	0.04438	0.072	9e-05
YFR055W	IRC7		1.03216	0.037	1.02388	0.053	0.02341	0.037	1e-05
YFR056C	YFR056C		0.99309	0.043	0.98329	0.045	0.00268	0.043	2e-05
YFR057W	YFR057W		1.06568	0.066	1.02095	0.063	0.04335	0.065	6e-05
YGL002W	ERP6		0.99252	0.026	1.01211	0.064	-0.0115	0.026	1e-05
YGL004C	RPN14		1.08632	0.031	1.02482	0.085	0.09096	0.031	0.00028	status=JK
YGL005C	COG7		1.01413	0.139	0.99824	0.078	0.01666	0.139	0.00071
YGL006W	PMC1		1.00366	0.038	1.01783	0.047	-0.00873	0.038	1e-05
YGL007W	YGL007W		0.68966	0.053	0.7813	0.042	-0.09843	0.053	0.00013
YGL009C	LEU1		1.00707	0.017	0.9631	0.126	0.03292	0.017	0
YGL010W	YGL010W		1.10396	0.006	1.10095	0.088	0.00647	0.006	1e-05	status=JK
YGL013C	PDR1		0.95358	0.042	0.96838	0.021	-0.01486	0.042	2e-05
YGL014W	PUF4		1.05019	0.026	1.03277	0.058	0.00023	0.026	0
YGL015C	YGL015C		1.06647	0.025	1.08934	0.037	-0.02658	0.025	0
YGL016W	KAP122		0.82693	0.034	0.73813	0.081	0.07671	0.034	0.00058	status=JK
YGL017W	ATE1		1.02072	0.086	1.03333	0.01	-0.01407	0.086	0.00016
YGL019W	CKB1		0.92183	0.082	0.94071	0.101	-0.01451	0.082	0.00019
YGL020C	GET1		0.86947	0.115	0.99701	0.051	-0.11687	0.115	0.00063
YGL021W	ALK1		1.07504	0.058	1.08762	0.029	0.00312	0.057	4e-05
YGL023C	PIB2		0.85007	0.08	0.8694	0.065	-0.00366	0.08	0.00023
YGL024W	YGL024W		0.57821	0.082	0.72228	0.01	-0.14607	0.082	0.00078
YGL026C	TRP5		0	0	0	0	0	0	#NUM!
YGL027C	CWH41		0.97464	0.047	1.03671	0.059	-0.07405	0.047	3e-05
YGL028C	SCW11		1.05231	0.015	1.09693	0.029	-0.04493	0.015	0
YGL029W	CGR1		0.9142	0.101	0.95495	0.044	-0.04845	0.101	0.00037
YGL031C	RPL24A		0.69166	0.06	0.71653	0.084	-0.0223	0.06	0.00018
YGL032C	AGA2		1.12812	0.037	1.09156	0.073	0.01851	0.037	1e-05
YGL034C	YGL034C		1.06774	0.085	1.07677	0.076	-0.00769	0.085	0.00014
YGL035C	MIG1		1.03007	0.083	0.97524	0.024	0.06039	0.083	0.00015
YGL036W	YGL036W		0.91838	0.019	0.91973	0.023	-0.00372	0.019	0.00014	status=JK
YGL037C	PNC1		1.01761	0.018	1.05885	0.046	-0.04392	0.018	0
YGL039W	YGL039W		0.98884	0.095	1.03447	0.131	-0.01738	0.095	0.00025
YGL041C	YGL041C		0.97913	0.045	0.99005	0.081	-0.02302	0.044	3e-05
YGL042C	YGL042C		0.96079	0.108	0.97431	0.005	-0.01126	0.108	0.00038
YGL043W	DST1		0.91289	0.067	0.9073	0.046	0.00369	0.067	0.00011
YGL045W	RIM8		0	0	0	0	0	0	#NUM!
YGL046W	YGL046W		0.77061	0.043	0.77233	0.049	-0.01091	0.043	5e-05
YGL049C	TIF4632		1.10976	0.032	1.03456	0.003	0.07576	0.032	1e-05
YGL050W	TYW3		1.11852	0.074	1.05389	0.008	0.06479	0.074	8e-05
YGL051W	MST27		1.05841	0.027	0.94803	0.142	0.07105	0.027	0.00022	status=JK
YGL053W	PRM8		0.97658	0.112	1.04447	0.097	-0.04556	0.112	0.00042
YGL054C	ERV14		0.82541	0.071	0.974	0.125	-0.15671	0.071	0.00017
YGL056C	SDS23		1.01691	0.151	1.05951	0.058	-0.06261	0.151	0.00089
YGL057C	GEP7		0.89258	0.083	0.69158	0.156	0.17185	0.083	0.00022
YGL058W	RAD6		1.06963	0.015	1.0925	0.023	-0.02557	0.015	7e-05	status=JK
YGL059W	PKP2		1.04414	0.044	1.06552	0.043	-0.02165	0.044	0.0006	status=JK
YGL060W	YBP2		1.06797	0.026	1.00255	0.08	0.08319	0.026	0.0002	status=JK
YGL062W	PYC1		1.06921	0.081	1.08674	0.105	-0.03336	0.081	0.00012
YGL063W	PUS2		1.001	0.08	0.94189	0.127	0.06815	0.08	0.00014
YGL066W	SGF73		0.72846	0.026	0.829	0.036	-0.10703	0.026	0.00041	status=JK
YGL067W	NPY1		1.02248	0.045	1.03807	0.004	-0.01485	0.045	2e-05
YGL071W	AFT1		1.00433	0.04	0.94342	0.089	0.08713	0.04	2e-05
YGL077C	HNM1		1.01995	0.029	0.98087	0.026	0.0405	0.029	1e-05
YGL078C	DBP3		0.79216	0.018	0.80757	0.025	-0.01885	0.018	0
YGL079W	KXD1		0.96641	0.037	0.9801	0.009	-0.01731	0.037	2e-05
YGL080W	FMP37		0.86403	0.014	0.81381	0.021	0.06012	0.014	0
YGL081W	YGL081W		1.05559	0.029	1.09409	0.052	-0.02453	0.029	1e-05
YGL082W	YGL082W		1.07266	0.024	1.01992	0.015	0.05484	0.024	0.00017	status=JK
YGL083W	SCY1		1.05562	0.027	1.0507	0.006	0.00993	0.027	0
YGL084C	GUP1		0.79817	0.058	0.8829	0.007	-0.08104	0.058	0.00011
YGL085W	LCL3		1.04851	0.036	0.98666	0.11	0.05446	0.036	1e-05
YGL086W	MAD1		0.99891	0.009	1.00475	0.014	-0.00387	0.009	3e-05	status=JK
YGL087C	MMS2		0.92612	0.05	0.93429	0.013	-0.00391	0.05	4e-05
YGL089C	MF(ALPHA)2		1.01616	0.044	1.05539	0.018	-0.04054	0.044	2e-05
YGL090W	LIF1		1.04465	0.019	0.99952	0.031	0.05008	0.019	0
YGL094C	PAN2		1.09777	0.066	1.0115	0.021	0.089	0.066	6e-05
YGL096W	TOS8		0.96856	0.052	0.96084	0.029	0.01402	0.052	4e-05
YGL101W	YGL101W		1.00737	0.024	1.02748	0.084	-0.00368	0.024	0.00019	status=JK
YGL104C	VPS73		1.03731	0.059	1.03348	0.008	0.00121	0.059	5e-05
YGL105W	ARC1		0	0	0.06218	0.081	-0.03922	0	#NUM!	status=JK
YGL108C	YGL108C		1.02524	0.045	1.05657	0.05	-0.02778	0.045	2e-05
YGL109W	YGL109W		1.0339	0.049	1.07265	0.044	-0.04	0.049	3e-05
YGL110C	CUE3		0.97239	0.006	0.99688	0.005	-0.02193	0.006	1e-05	status=JK
YGL114W	YGL114W		1.01833	0.031	1.01422	0.056	0.01942	0.031	0.0003	status=JK
YGL115W	SNF4		0.87488	0.021	0.83939	0.033	0.02979	0.021	0.0002	status=JK
YGL117W	YGL117W		1.11501	0.002	1.1028	0.057	0.01492	0.002	0	status=JK
YGL118C	YGL118C		1.02344	0.054	1.04274	0.033	-0.01607	0.054	4e-05
YGL121C	GPG1		0.96798	0.143	1.07995	0.011	-0.11106	0.143	0.00088
YGL124C	MON1		0.8905	0.17	0.90623	0.061	-0.01186	0.169	0.00184
YGL125W	MET13		1.05758	0.06	1.03922	0.014	0.02319	0.06	5e-05
YGL126W	SCS3		1.00322	0.023	0.9397	0.028	0.06325	0.023	0.00017	status=JK
YGL127C	SOH1		0.65627	0.052	0.71148	0.029	-0.06111	0.052	0.00014
YGL131C	SNT2		0.99768	0.038	0.98111	0.03	0.02391	0.038	2e-05
YGL132W	YGL132W		1.04562	0.067	0.93102	0.177	0.08841	0.067	7e-05
YGL133W	ITC1		0.96232	0.063	0.94833	0.133	-0.01173	0.063	8e-05
YGL136C	MRM2		0.33535	0.189	0.35015	0.211	0.04454	0.189	0.03832
YGL138C	YGL138C		1.04457	0.061	1.10984	0.013	-0.06169	0.061	5e-05
YGL139W	FLC3		1.017	0.021	1.01589	0.028	0.01532	0.021	0.00014	status=JK
YGL140C	YGL140C		0.94396	0.123	1.02507	0.052	-0.09254	0.123	0.0006
YGL141W	HUL5		1.02104	0.037	1.01381	0.044	0.00951	0.036	1e-05
YGL144C	ROG1		1.035	0.07	1.10171	0.01	-0.06413	0.07	9e-05
YGL146C	RRT6		1.05707	0.061	1.02764	0.051	0.03094	0.061	5e-05
YGL147C	RPL9A		0.86984	0.092	0.95776	0.021	-0.08976	0.092	0.00032
YGL148W	ARO2		0.83566	0.077	0.83283	0.008	0.00872	0.077	0.00021
YGL149W	YGL149W		0.80666	0.069	0.93925	0.04	-0.1382	0.069	0.00017
YGL151W	NUT1		0.7794	0.015	0.84258	0.097	-0.07646	0.015	0.00013	status=JK
YGL152C	YGL152C		0.99127	0.003	1.02846	0.044	-0.0286	0.003	0	status=JK
YGL153W	PEX14		0.95738	0.019	0.92479	0.035	0.03282	0.019	0
YGL154C	LYS5		0.54777	0.041	0.63147	0.027	-0.07853	0.041	0.00012
YGL156W	AMS1		1.02683	0.009	1.04002	0.04	-0.008	0.009	3e-05	status=JK
YGL157W	ARI1		1.09726	0.017	1.05249	0.005	0.04732	0.017	8e-05	status=JK
YGL158W	RCK1		1.07241	0.054	1.00355	0.062	0.06135	0.054	3e-05
YGL159W	YGL159W		1.0987	0.064	1.01639	0.099	0.07187	0.064	5e-05
YGL160W	AIM14		1.01604	0.01	0.98836	0.028	0.02988	0.01	3e-05	status=JK
YGL161C	YIP5		0.99418	0.086	1.02896	0.051	-0.04032	0.085	0.00017
YGL162W	SUT1		0.97959	0.011	1.04951	0.025	-0.07378	0.011	0
YGL163C	RAD54		0.90762	0.024	0.97185	0.018	-0.05228	0.024	1e-05
YGL164C	YRB30		1.10054	0.069	1.15468	0.02	-0.04286	0.069	7e-05
YGL165C	YGL165C		1.07215	0.014	1.13795	0.005	-0.0613	0.014	0
YGL166W	CUP2		1.09497	0.016	1.1257	0.009	-0.03202	0.016	0
YGL167C	PMR1		0.61744	0.129	0.80931	0.016	-0.19412	0.128	0.00239
YGL168W	HUR1		0.50619	0.059	0.71895	0.013	-0.20466	0.059	0.00044
YGL170C	SPO74		1.00425	0.016	1.00275	0.065	-0.00517	0.016	8e-05	status=JK
YGL173C	XRN1		0.43647	0.032	0.59812	0.057	-0.16992	0.032	0.00011
YGL174W	BUD13		0.60543	0.034	0.73673	0.033	-0.14547	0.034	0.00104	status=JK
YGL175C	SAE2		0.68778	0.017	0.88605	0.079	-0.1831	0.017	0.00021	status=JK
YGL176C	YGL176C		1.16227	0.071	1.13372	0.044	0.03245	0.071	6e-05
YGL177W	YGL177W		1.27108	0.11	1.18596	0.033	0.07682	0.109	0.00018
YGL179C	TOS3		1.21385	0.078	1.14713	0.107	0.02497	0.078	7e-05
YGL180W	ATG1		1.02855	0.024	0.83918	0.029	0.20267	0.024	0
YGL181W	GTS1		1.02365	0.006	0.94485	0.106	0.05416	0.006	1e-05	status=JK
YGL194C	HOS2		0.67452	0.015	0.62434	0.055	0.05841	0.015	0.00017	status=JK
YGL195W	GCN1		0.88257	0.061	0.90477	0.07	-0.01483	0.061	9e-05
YGL196W	DSD1		0.91001	0.028	1.07412	0.084	-0.15533	0.028	0.00031	status=JK
YGL197W	MDS3		0.80316	0.132	0.89527	0.024	-0.08648	0.132	0.0012
YGL198W	YIP4		0.96887	0.191	1.1522	0.023	-0.18224	0.191	0.00206
YGL199C	YGL199C		1.00129	0.087	0.99489	0.037	-0.0093	0.087	0.00018
YGL202W	ARO8		0.95319	0.096	1.01245	0.05	-0.04724	0.096	0.00028
YGL203C	KEX1		0.95855	0.021	0.98456	0.042	-0.00053	0.021	0.00016	status=JK
YGL205W	POX1		0.95895	0.035	0.99071	0.059	-0.048	0.035	1e-05
YGL208W	SIP2		0.96361	0.002	1.05776	0.037	-0.09204	0.002	0	status=JK
YGL209W	MIG2		0.99477	0.024	1.04821	0.024	-0.05335	0.024	0
YGL210W	YPT32		1.02206	0.087	1.01274	0.029	0.00682	0.087	0.00017
YGL211W	NCS6		0.88758	0.009	0.95446	0.018	-0.06218	0.009	4e-05	status=JK
YGL212W	VAM7		0.76617	0.03	0.82162	0.025	-0.05367	0.03	2e-05
YGL213C	SKI8		0.95122	0.007	0.97734	0.032	-0.01829	0.007	2e-05	status=JK
YGL214W	YGL214W		0.03781	0.032	0.38061	0.028	-0.33817	0.032	0.10193
YGL215W	CLG1		0.94154	0.006	0.92559	0.023	0.01858	0.006	2e-05	status=JK
YGL216W	KIP3		1.00193	0.028	1.00781	0.08	-0.02433	0.028	1e-05
YGL217C	YGL217C		0.98715	0.008	0.97811	0.035	0.00159	0.008	2e-05	status=JK
YGL218W	YGL218W		0.65194	0.137	0.66823	0.1	-0.01699	0.136	0.00243
YGL219C	MDM34		0.8966	0.033	0.79662	0.035	0.10372	0.033	1e-05
YGL221C	NIF3		0.98954	0.018	0.97995	0.003	0.012	0.018	0
YGL222C	EDC1		1.04165	0.019	1.08028	0.004	-0.03455	0.019	0
YGL224C	SDT1		1.07124	0.058	1.07497	0.026	0.00535	0.058	4e-05
YGL226C-A	OST5		1.13075	0.012	1.07023	0.034	0.06972	0.012	4e-05	status=JK
YGL226W	MTC3		0.94474	0.044	0.81493	0.064	0.14223	0.044	3e-05
YGL227W	VID30		1.03208	0.015	1.01797	0.045	0.00562	0.015	0
YGL228W	SHE10		1.0189	0.035	1.0634	0.027	-0.0449	0.034	1e-05
YGL229C	SAP4		1.06288	0.045	1.05017	0.081	0.01575	0.045	2e-05
YGL230C	YGL230C		1.02162	0.071	1.00518	0.009	0.01571	0.071	9e-05
YGL231C	EMC4		1.05942	0.054	1.04773	0.007	0.01064	0.053	4e-05
YGL232W	TAN1		1.11486	0.03	1.09348	0.047	0.03519	0.03	1e-05
YGL234W	ADE5		1.03125	0.024	1.02887	0.029	0.00819	0.024	0
YGL235W	YGL235W		0.84573	0.057	0.80577	0.019	0.03282	0.057	9e-05
YGL236C	MTO1		0.90827	0.049	0.79401	0.066	0.1056	0.049	4e-05
YGL237C	HAP2		0.76687	0.072	0.79657	0.068	-0.02836	0.071	0.00022
YGL241W	KAP114		1.11347	0.06	1.04324	0.034	0.06936	0.06	4e-05
YGL242C	YGL242C		0.99677	0.07	1.02977	0.018	-0.02998	0.07	0.0001
YGL243W	TAD1		1.06904	0.012	1.02188	0.025	0.04603	0.012	4e-05	status=JK
YGL244W	RTF1		0.59817	0.015	0.71043	0.061	-0.12542	0.015	0.0002	status=JK
YGL248W	PDE1		1.01753	0.058	1.02116	0.047	-0.00797	0.058	5e-05
YGL249W	ZIP2		1.08232	0.04	1.02361	0.024	0.0631	0.04	1e-05
YGL250W	RMR1		1.03643	0.023	1.0256	0.012	0.01714	0.023	0.00016	status=JK
YGL251C	HFM1		1.0582	0.016	1.09958	0.069	-0.03915	0.016	8e-05	status=JK
YGL252C	RTG2		0.60681	0.019	0.62429	0.049	-0.01866	0.019	0.00034	status=JK
YGL253W	HXK2		0.96492	0.014	0.92252	0.058	0.04418	0.014	7e-05	status=JK
YGL254W	FZF1		1.00369	0.148	1.02734	0.066	0.00306	0.147	0.00086
YGL255W	ZRT1		0.94589	0.09	0.91375	0.038	0.04194	0.09	0.00024
YGL256W	ADH4		1.05688	0.058	1.0736	0.041	-0.02493	0.058	5e-05
YGL257C	MNT2		1.02719	0.038	1.06227	0.062	-0.04619	0.038	1e-05
YGL258W	VEL1		1.02809	0.021	1.02739	0.031	-0.00013	0.02	0
YGL259W	YPS5		1.11677	0.018	1.08108	0.032	0.03353	0.018	9e-05	status=JK
YGL260W	YGL260W		1.03112	0.037	0.99239	0.025	0.04326	0.037	1e-05
YGL261C	PAU11		0.97216	0.043	0.97844	0.05	0.00491	0.043	2e-05
YGL262W	YGL262W		1.03207	0.06	0.99213	0.059	0.0429	0.06	5e-05
YGL263W	COS12		1.03565	0.022	1.00368	0.049	0.04043	0.022	0
YGR001C	YGR001C		0.92395	0.146	0.95441	0.064	-0.03766	0.146	0.00107
YGR003W	CUL3		1.0359	0.034	1.04203	0.024	-0.00943	0.034	1e-05
YGR004W	PEX31		0.97149	0.081	1.01722	0.014	-0.04189	0.081	0.00016
YGR007W	ECT1		0.99694	0.02	1.01919	0.012	-0.0252	0.02	0
YGR008C	STF2		1.03621	0.053	1.02067	0.036	0.013	0.053	4e-05
YGR010W	NMA2		1.01254	0.012	1.00013	0.023	0.00069	0.012	5e-05	status=JK
YGR011W	YGR011W		1.01385	0.049	0.99319	0.036	0.03071	0.049	3e-05
YGR012W	YGR012W		1.03542	0.087	1.07177	0.069	-0.05189	0.087	0.00016
YGR014W	MSB2		1.0297	0.041	1.01524	0.054	0.02281	0.04	2e-05
YGR015C	YGR015C		1.0385	0.017	1.00656	0.06	0.0304	0.016	0
YGR016W	YGR016W		0.96765	0.147	1.04653	0.031	-0.07827	0.147	0.00095
YGR017W	YGR017W		0.89558	0.084	0.89106	0.05	-0.00482	0.084	0.00023
YGR018C	YGR018C		0.81135	0.128	0.95579	0.006	-0.13954	0.128	0.00106
YGR019W	UGA1		1.12567	0.063	1.07523	0.017	0.05391	0.063	5e-05
YGR021W	YGR021W		1.02486	0.111	1.0147	0.074	-0.00407	0.111	0.00035
YGR022C	YGR022C		1.03684	0.008	0.95759	0.041	0.07917	0.008	2e-05	status=JK
YGR023W	MTL1		1.05458	0.015	1.09642	0.037	-0.03256	0.015	0
YGR025W	YGR025W		1.068	0.007	1.06832	0.082	-0.00323	0.007	1e-05	status=JK
YGR026W	YGR026W		0.9962	0.019	0.99424	0.021	0.00827	0.019	0
YGR027C	RPS25A		0.78297	0.074	0.77585	0.065	-0.00585	0.074	0.00023
YGR028W	MSP1		0.96646	0.038	0.95273	0.045	0.00343	0.038	2e-05
YGR031W	IMO32		1.02437	0.011	0.97839	0.022	0.04233	0.011	4e-05	status=JK
YGR032W	GSC2		1.04597	0.087	0.98302	0.008	0.06388	0.087	0.00016
YGR033C	TIM21		1.03612	0.128	1.07317	0.078	-0.0201	0.128	0.00051
YGR034W	RPL26B		1.0482	0.147	1.05783	0.022	0.00066	0.147	0.00074
YGR035C	YGR035C		0.98696	0.053	0.99047	0.012	0.00423	0.053	4e-05
YGR037C	ACB1		0.87343	0.036	0.87934	0.004	-0.0024	0.036	2e-05
YGR038W	ORM1		1.04059	0.082	0.90315	0.08	0.15833	0.082	0.00014
YGR039W	YGR039W		1.00927	0.047	1.02128	0.042	0.00424	0.047	3e-05
YGR040W	KSS1		0.97454	0.062	1.00919	0.049	-0.0288	0.062	7e-05
YGR041W	BUD9		1.01308	0.042	1.01422	0.08	-0.004	0.042	2e-05
YGR042W	YGR042W		1.04288	0.016	1.07651	0.035	-0.02936	0.015	0
YGR043C	NQM1		1.07898	0.044	1.08638	0.006	-0.0071	0.044	2e-05
YGR044C	RME1		1.07923	0.056	1.09284	0.047	0.00017	0.056	4e-05
YGR045C	YGR045C		1.08703	0.048	1.04459	0.026	0.04509	0.048	2e-05
YGR049W	SCM4		0.97701	0.066	0.92971	0.116	0.06379	0.066	8e-05
YGR050C	YGR050C		1.0533	0.066	1.0442	0.009	0.0099	0.066	7e-05
YGR051C	YGR051C		1.195	0.049	1.14536	0.011	0.05472	0.049	2e-05
YGR052W	FMP48		1.05106	0.059	1.05873	0.057	-0.00264	0.059	5e-05
YGR053C	YGR053C		1.0027	0.066	1.00658	0.056	-0.00695	0.066	8e-05
YGR054W	YGR054W		1.08266	0.029	1.04661	0.053	0.04188	0.029	1e-05
YGR055W	MUP1		1.00328	0.135	1.0322	0.066	-0.03998	0.135	0.00067
YGR058W	PEF1		0.9519	0.071	0.98773	0.021	-0.03041	0.071	0.00011
YGR059W	SPR3		0.95949	0.063	0.93257	0.068	0.03374	0.063	8e-05
YGR061C	ADE6		0.91575	0.121	0.87604	0.209	0.0037	0.121	0.0058	status=JK
YGR066C	YGR066C		1.04842	0.041	1.06259	0.043	-0.0136	0.041	2e-05
YGR067C	YGR067C		0.99975	0.038	1.04423	0.002	-0.04419	0.037	1e-05
YGR068C	ART5		0.9726	0.089	1.01568	0.037	-0.03565	0.088	0.00021
YGR069W	YGR069W		1.02701	0.024	1.02773	0.06	0.0174	0.024	0
YGR070W	ROM1		0.9986	0.055	1.0322	0.041	-0.02861	0.054	4e-05
YGR071C	ENV11		1.0011	0.007	0.95702	0.033	0.04024	0.007	2e-05	status=JK
YGR072W	UPF3		0.97688	0.045	0.91411	0.071	0.07581	0.045	3e-05
YGR077C	PEX8		0.87049	0.049	0.81749	0.036	0.05999	0.049	5e-05
YGR078C	PAC10		0.81446	0.1	0.71935	0.157	0.07802	0.1	0.0005
YGR079W	YGR079W		0.98385	0.01	1.04058	0.059	-0.07235	0.01	4e-05	status=JK
YGR080W	TWF1		1.03149	0.018	1.07445	0.006	-0.03987	0.018	0.0001	status=JK
YGR081C	SLX9		0.4944	0.039	0.7349	0.01	-0.24415	0.039	0.00014
YGR084C	MRP13		0.98016	0.048	0.98456	0.021	0.00898	0.048	3e-05
YGR085C	RPL11B		0.78994	0.03	0.85267	0.011	-0.05988	0.03	1e-05
YGR086C	PIL1		1.00801	0.008	1.03729	0.007	-0.02398	0.008	2e-05	status=JK
YGR087C	PDC6		1.05524	0.036	1.02476	0.027	0.03096	0.036	1e-05
YGR088W	CTT1		0.95012	0.146	1.05641	0.017	-0.11298	0.145	0.00097
YGR089W	NNF2		1.07337	0.057	1.02037	0.074	0.06045	0.056	4e-05
YGR092W	DBF2		0.63555	0.013	0.60196	0.021	0.02493	0.012	0.00013	status=JK
YGR093W	YGR093W		1.04425	0.019	0.968	0.085	0.08978	0.019	0.00011	status=JK
YGR096W	TPC1		0.9558	0.12	0.97579	0.066	-0.00889	0.12	0.00054
YGR097W	ASK10		0.8155	0.092	0.7789	0.098	0.05372	0.092	0.0004
YGR100W	MDR1		1.03417	0.016	1.03241	0.054	-0.00018	0.016	8e-05	status=JK
YGR101W	PCP1		0.84734	0.037	0.78625	0.037	0.05686	0.037	2e-05
YGR105W	VMA21		0.61209	0.085	0.59948	0.004	0.01285	0.085	0.00072
YGR106C	VOA1		1.01898	0.02	0.99691	0.076	0.0111	0.02	0
YGR107W	YGR107W		1.01398	0.015	1.00131	0.021	0.0148	0.014	0
YGR108W	CLB1		1.07835	0.028	1.05369	0.014	0.02361	0.028	0.00022	status=JK
YGR109C	CLB6		0.98674	0.029	0.97704	0.039	0.01738	0.029	1e-05
YGR110W	CLD1		1.04631	0.046	1.05645	0.047	-0.00453	0.045	2e-05
YGR111W	YGR111W		0.93707	0.076	1.02686	0.038	-0.09278	0.076	0.00014
YGR117C	YGR117C		0.9659	0.053	1.01615	0.031	-0.0522	0.053	4e-05
YGR118W	RPS23A		0.80849	0.027	0.81004	0.048	-0.01563	0.027	1e-05
YGR121C	MEP1		0.97012	0.038	0.97872	0.026	-0.00761	0.037	2e-05
YGR122C-A	YGR122C-A		1.09895	0.078	1.10808	0.01	-0.00376	0.078	0.0001
YGR122W	YGR122W		0.85032	0.033	0.90553	0.034	-0.05518	0.033	2e-05
YGR123C	PPT1		1.08385	0.095	1.08011	0.057	0.01612	0.095	0.00018
YGR124W	ASN2		0.99317	0.051	0.95505	0.006	0.03736	0.051	4e-05
YGR125W	YGR125W		0.92014	0.034	0.9122	0.08	-0.00898	0.034	1e-05
YGR126W	YGR126W		0.99069	0.127	1.04177	0.031	-0.0481	0.127	0.00057
YGR127W	YGR127W		1.08961	0.068	1.0777	0.009	0.01589	0.068	7e-05
YGR129W	SYF2		1.06874	0.014	0.94449	0.054	0.12922	0.014	6e-05	status=JK
YGR130C	YGR130C		0.99528	0.076	1.02591	0.006	-0.02547	0.076	0.00012
YGR131W	FHN1		1.02932	0.019	1.0817	0.08	-0.05966	0.019	0.00011	status=JK
YGR132C	PHB1		0.94555	0.028	0.9097	0.003	0.03648	0.027	1e-05
YGR133W	PEX4		0.97501	0.029	0.98122	0.02	-0.00402	0.029	1e-05
YGR134W	CAF130		1.01612	0.051	1.00667	0.012	0.01316	0.051	3e-05
YGR135W	PRE9		0.8763	0.023	0.93828	0.008	-0.06069	0.023	1e-05
YGR136W	LSB1		0.97681	0.054	0.99357	0.007	-0.01389	0.054	5e-05
YGR137W	YGR137W		1.0851	0.107	1.01372	0.014	0.06942	0.106	0.00026
YGR138C	TPO2		1.0095	0.091	1.03255	0.079	-0.03783	0.091	0.0002
YGR139W	YGR139W		1.06479	0.144	1.07329	0.112	0.00787	0.143	0.00066
YGR141W	VPS62		0.93814	0.085	0.98097	0.035	-0.03906	0.085	0.00021
YGR142W	BTN2		0.96936	0.063	0.92667	0.039	0.03166	0.063	7e-05
YGR143W	SKN1		1.0198	0.041	1.05812	0.041	-0.02868	0.041	2e-05
YGR144W	THI4		1.07361	0.032	1.08185	0.054	-0.00883	0.032	1e-05
YGR146C	ECL1		1.08617	0.069	1.11595	0.033	-0.03543	0.069	7e-05
YGR148C	RPL24B		0.74565	0.036	0.81182	0.031	-0.06705	0.036	3e-05
YGR149W	YGR149W		0.98758	0.058	1.05465	0.043	-0.06744	0.058	6e-05
YGR151C	YGR151C		1.11499	0.043	1.14293	0.015	-0.02812	0.043	2e-05
YGR152C	RSR1		1.00029	0.084	0.95782	0.16	0.03996	0.084	0.00016
YGR153W	YGR153W		1.00063	0.009	0.90933	0.014	0.09287	0.009	3e-05	status=JK
YGR154C	GTO1		0.92483	0.064	1.01522	0.009	-0.09048	0.064	9e-05
YGR157W	CHO2		0.49827	0.09	0.4937	0.03	0.01015	0.089	0.00156
YGR161C	RTS3		1.10156	0.026	0.98914	0.09	0.09236	0.025	0.00018	status=JK
YGR163W	GTR2		0.90469	0.093	0.72123	0.045	0.20272	0.093	0.0003
YGR164W	YGR164W		1.06187	0.035	1.02687	0.118	0.00012	0.035	1e-05
YGR166W	TRS65		0.97551	0.01	0.95658	0.092	0.01763	0.01	4e-05	status=JK
YGR168C	YGR168C		0.93644	0.03	0.93282	0.073	-0.0037	0.03	1e-05
YGR169C	PUS6		1.02891	0.049	1.01641	0.003	0.01273	0.048	3e-05
YGR170W	PSD2		1.02115	0.044	1.03056	0.024	-0.00952	0.044	2e-05
YGR173W	RBG2		1.01717	0.002	0.99976	0.039	0.02052	0.002	0	status=JK
YGR174C	CBP4		0.90258	0.052	0.8292	0.057	0.06108	0.052	5e-05
YGR176W	YGR176W		1.09305	0.049	1.08836	0.018	0.00152	0.049	3e-05
YGR177C	ATF2		1.0616	0.089	1.05953	0.04	0.00076	0.089	0.00016
YGR178C	PBP1		1.04063	0.009	1.03789	0.023	0.00537	0.009	0
YGR181W	TIM13		1.03364	0.023	1.02662	0.158	0.00447	0.023	0.00017	status=JK
YGR182C	YGR182C		0.91886	0.052	0.85777	0.106	0.06449	0.052	5e-05
YGR183C	QCR9		0.89971	0.05	0.80907	0.108	0.07349	0.05	5e-05
YGR184C	UBR1		1.00162	0.044	0.98833	0.047	0.02295	0.044	2e-05
YGR187C	HGH1		0.91842	0.044	0.94869	0.054	-0.02039	0.044	3e-05
YGR188C	BUB1		0.63624	0.097	0.64547	0.006	-0.00974	0.097	0.00095
YGR189C	CRH1		1.13506	0.049	1.07432	0.032	0.06655	0.049	2e-05
YGR192C	TDH3		0.98587	0.049	1.00774	0.054	-0.03236	0.049	3e-05
YGR193C	PDX1		1.0466	0.048	0.96799	0.014	0.07738	0.048	3e-05
YGR194C	XKS1		1.03738	0.005	1.0164	0.015	0.01998	0.005	1e-05	status=JK
YGR196C	FYV8		0.979	0.023	1.02382	0.032	-0.03967	0.023	0
YGR197C	SNG1		1.04789	0.08	1.11281	0.102	-0.07659	0.079	0.00012
YGR199W	PMT6		1.13078	0.1	1.15389	0.09	-0.03622	0.099	0.00019
YGR200C	ELP2		0.81329	0.02	0.86589	0.007	-0.05335	0.02	0
YGR201C	YGR201C		1.13211	0.006	1.1194	0.034	0.01817	0.006	1e-05	status=JK
YGR202C	PCT1		1.13424	0.021	1.088	0.029	0.05384	0.021	0.00012	status=JK
YGR203W	YCH1		1.00399	0.048	0.99022	0.029	0.00676	0.047	3e-05
YGR205W	TDA10		1.05988	0.031	1.03799	0.008	0.02041	0.031	1e-05
YGR206W	MVB12		0.90298	0.163	0.92356	0.045	-0.02762	0.162	0.00156
YGR207C	CIR1		1.16892	0.025	1.094	0.044	0.06525	0.025	0.00015	status=JK
YGR208W	SER2		1.16072	0.044	1.07199	0.04	0.08441	0.043	0.00047	status=JK
YGR209C	TRX2		0.9641	0.043	1.01801	0.012	-0.04902	0.043	2e-05
YGR210C	YGR210C		1.01971	0.12	1.11994	0.096	-0.1054	0.12	0.00045
YGR212W	SLI1		1.0382	0.087	0.98066	0.041	0.07512	0.086	0.00016
YGR213C	RTA1		1.06896	0.03	1.06739	0.053	0.00801	0.03	1e-05
YGR214W	RPS0A		0.88032	0.023	0.89513	0.007	-0.0124	0.023	1e-05
YGR217W	CCH1		0.99771	0.033	1.00956	0.059	-0.02678	0.033	1e-05
YGR221C	TOS2		0.95376	0.019	0.97101	0.032	-0.01783	0.019	0
YGR223C	HSV2		0.90543	0.058	0.87881	0.006	0.02758	0.058	7e-05
YGR224W	AZR1		1.17519	0.023	1.09273	0.014	0.07971	0.023	0.00013	status=JK
YGR225W	AMA1		0.94432	0.076	0.9956	0.011	-0.04994	0.076	0.00014
YGR226C	YGR226C		0.99892	0.046	0.99732	0.044	-0.01023	0.046	3e-05
YGR227W	DIE2		1.0214	0.075	1.05304	0.012	-0.03658	0.075	0.00011
YGR228W	YGR228W		0.9952	0.034	1.01869	0.117	-0.02446	0.034	1e-05
YGR229C	SMI1		0.89348	0.034	0.91458	0.069	-0.01063	0.034	2e-05
YGR230W	BNS1		1.1369	0.042	1.15952	0.036	-0.01684	0.042	1e-05
YGR231C	PHB2		0.72121	0.011	0.68714	0.034	0.04284	0.011	0
YGR232W	NAS6		1.02769	0.031	1.04781	0.039	-0.01154	0.031	1e-05
YGR233C	PHO81		0.9902	0.054	1.00377	0.044	-0.014	0.054	4e-05
YGR234W	YHB1		1.11652	0.058	1.11886	0.082	0.01557	0.058	4e-05
YGR235C	MOS2		0.98748	0.172	1.11035	0.026	-0.10889	0.172	0.00142
YGR236C	SPG1		0.96305	0.093	1.00702	0.026	-0.04483	0.093	0.00025
YGR237C	YGR237C		1.01699	0.112	0.99327	0.094	0.01815	0.111	0.00036
YGR238C	KEL2		1.04594	0.036	1.00346	0.006	0.04146	0.036	0.00039	status=JK
YGR239C	PEX21		0.95652	0.042	0.97056	0.027	-0.00725	0.042	2e-05
YGR241C	YAP1802		1.03291	0.001	1.02203	0.012	0.0097	0.001	0	status=JK
YGR242W	YGR242W		1.06615	0.065	1.02551	0.017	0.04583	0.064	6e-05
YGR243W	FMP43		1.11439	0.009	1.10233	0.006	0.00864	0.009	2e-05	status=JK
YGR244C	LSC2		1.13864	0.017	1.098	0.072	0.04065	0.017	8e-05	status=JK
YGR247W	CPD1		1.01646	0.033	1.00675	0.105	0.02298	0.033	1e-05
YGR248W	SOL4		1.02353	0.018	1.02178	0.063	0.0118	0.018	0.00011	status=JK
YGR249W	MGA1		1.10579	0.022	1.1195	0.079	-0.01927	0.022	0
YGR250C	YGR250C		0.9098	0.066	0.92027	0.055	-0.00805	0.066	0.00011
YGR254W	ENO1		1.01174	0.111	1.04441	0.013	-0.03438	0.111	0.00036
YGR255C	COQ6		0.98183	0.044	1.02564	0.004	-0.0411	0.044	3e-05
YGR256W	GND2		0.93457	0.008	1.0414	0.087	-0.10549	0.008	3e-05	status=JK
YGR259C	YGR259C		1.05279	0.099	0.97863	0.014	0.06661	0.099	0.00023
YGR260W	TNA1		1.01348	0.075	0.94833	0.07	0.07332	0.075	0.00011
YGR261C	APL6		1.07441	0.028	1.11629	0.051	-0.03998	0.028	0
YGR263C	SAY1		1.0337	0.054	1.08165	0.08	-0.04505	0.054	4e-05
YGR266W	YGR266W		0.95273	0.051	0.95686	0.043	0.00635	0.051	4e-05
YGR268C	HUA1		1.07261	0.022	0.44014	0.518	0.69186	0.022	0.00014	status=JK
YGR269W	YGR269W		1.02112	0.061	0.76524	0.382	0.21476	0.061	6e-05
YGR270W	YTA7		0.73098	0.014	0.82184	0.083	-0.0731	0.014	0.00012	status=JK
YGR271W	SLH1		1.00712	0.052	0.90976	0.18	0.05947	0.052	4e-05
YGR272C	YGR272C		1.03688	0.083	1.02327	0.003	0.01496	0.083	0.00014
YGR273C	YGR273C		1.06572	0.082	1.08733	0.009	-0.02323	0.082	0.00012
YGR275W	RTT102		0.8861	0.135	0.90231	0.159	-0.01907	0.135	0.00096
YGR276C	RNH70		1.07524	0.023	1.09819	0.034	-0.03005	0.023	0.00015	status=JK
YGR279C	SCW4		0.87213	0.2	0.84842	0.033	0.02145	0.199	0.00315
YGR281W	YOR1		1.00423	0.056	1.08025	0.056	-0.0512	0.056	5e-05
YGR282C	BGL2		1.02038	0.055	1.08315	0.133	-0.05934	0.055	4e-05
YGR283C	YGR283C		0.91796	0.065	0.99153	0.094	-0.09668	0.065	0.0001
YGR284C	ERV29		0.99522	0.113	0.96173	0.15	0.03851	0.113	0.0004
YGR286C	BIO2		0.98076	0.046	0.9898	0.037	-0.00765	0.046	3e-05
YGR287C	IMA1		1.01501	0.041	0.9907	0.085	0.011	0.041	2e-05
YGR288W	MAL13		1.005	0.011	0.99401	0.033	0.01183	0.011	4e-05	status=JK
YGR289C	MAL11		1.00392	0.009	0.97012	0.006	0.03406	0.009	2e-05	status=JK
YGR290W	YGR290W		1.12756	0.055	1.11886	0.036	0.01153	0.055	3e-05
YGR291C	YGR291C		1.0338	0.011	1.0888	0.051	-0.05367	0.011	4e-05	status=JK
YGR292W	MAL12		1.08284	0.07	1.03426	0.036	0.04835	0.07	7e-05
YGR295C	COS6		0.97706	0.052	0.97592	0.032	0.00616	0.051	4e-05
YHL002W	HSE1		1.01421	0.062	1.02109	0.035	-0.00322	0.062	6e-05
YHL003C	LAG1		1.02592	0.098	1.04051	0.089	0.00563	0.097	0.00024
YHL005C	YHL005C		0.81913	0.05	0.79817	0.012	0.02531	0.05	6e-05
YHL006C	SHU1		0.99944	0.045	0.98014	0.014	0.01219	0.045	3e-05
YHL007C	STE20		0.31693	0.217	0	0	0.31626	0.216	0.06112
YHL008C	YHL008C		1.05446	0.052	1.01496	0.208	0.04183	0.052	3e-05
YHL009C	YAP3		1.04728	0.045	1.02573	0.052	0.00859	0.045	2e-05
YHL010C	ETP1		0.99595	0.047	1.01164	0.029	-0.01424	0.047	3e-05
YHL012W	YHL012W		1.02736	0.02	1.05237	0.043	-0.0118	0.02	0
YHL013C	OTU2		1.01865	0.065	0.97758	0.019	0.04706	0.065	7e-05
YHL014C	YLF2		1.06166	0.066	1.06924	0.052	-0.00842	0.066	7e-05
YHL016C	DUR3		1.01278	0.072	1.01337	0.053	-0.01369	0.072	0.0001
YHL017W	YHL017W		1.00825	0.103	1.02228	0.019	-0.01456	0.103	0.00029
YHL019C	APM2		1.03338	0.031	0.99667	0.016	0.03263	0.031	1e-05
YHL020C	OPI1		0.61538	0.101	0.60951	0.072	0.00806	0.1	0.00118
YHL021C	AIM17		0.99567	0.029	0.96086	0.104	0.03236	0.029	1e-05
YHL022C	SPO11		1.07825	0.012	1.12376	0.089	-0.0666	0.012	4e-05	status=JK
YHL023C	NPR3		0.92629	0.008	0.84637	0.012	0.07829	0.008	2e-05	status=JK
YHL024W	RIM4		1.04586	0.024	1.05306	0.017	-0.00963	0.024	0
YHL025W	SNF6		0.86475	0.02	0.87672	0.014	-0.0083	0.02	0
YHL026C	YHL026C		0.98902	0.054	0.981	0.027	0.01194	0.054	4e-05
YHL027W	RIM101		0.66351	0.168	0.79185	0.074	-0.13276	0.167	0.00421
YHL028W	WSC4		0.99103	0.006	1.00013	0.029	-0.01468	0.006	1e-05	status=JK
YHL029C	OCA5		0.87994	0.048	0.87674	0.027	0.00813	0.048	5e-05
YHL030W	ECM29		0.96652	0.028	1.00442	0.019	-0.03452	0.028	1e-05
YHL031C	GOS1		0.6403	0.087	0.68368	0.012	-0.044	0.087	0.00067
YHL032C	GUT1		0.96521	0.087	1.06205	0.103	-0.10263	0.087	0.0002
YHL033C	RPL8A		0.69894	0.041	0.75495	0.115	-0.04887	0.041	6e-05
YHL034C	SBP1		0.94816	0.049	0.97168	0.037	-0.01906	0.049	4e-05
YHL035C	VMR1		0.97921	0.079	0.99758	0.02	-0.01397	0.079	0.00014
YHL036W	MUP3		1.05991	0.064	1.02044	0.003	0.03753	0.064	6e-05
YHL037C	YHL037C		1.02316	0.033	0.90318	0.102	0.11683	0.033	1e-05
YHL039W	EFM1		1.01362	0.072	1.01228	0.135	0.02936	0.072	0.0001
YHL040C	ARN1		1.05346	0.022	1.0172	0.042	0.04148	0.022	0.00014	status=JK
YHL041W	YHL041W		1.04977	0.026	1.04316	0.02	0.00437	0.026	0.00021	status=JK
YHL042W	YHL042W		1.00949	0.04	1.01994	0.011	-0.01677	0.04	2e-05
YHL043W	ECM34		1.02213	0.034	1.00967	0.015	0.01615	0.034	1e-05
YHL044W	YHL044W		0.98531	0.064	0.92081	0.041	0.04223	0.064	7e-05
YHL045W	YHL045W		1.0435	0.044	1.03656	0.112	0.01806	0.044	2e-05
YHL046C	PAU13		1.02419	0.005	1.03806	0.07	0.0056	0.005	1e-05	status=JK
YHL047C	ARN2		1.02282	0.07	1.01546	0.007	0.01112	0.07	9e-05
YHR001W-A	QCR10		0.99891	0.038	1.03158	0.016	-0.03016	0.037	1e-05
YHR003C	YHR003C		0.79615	0.148	0.92886	0.001	-0.13245	0.148	0.00171
YHR004C	NEM1		0.97243	0.115	0.95442	0.013	0.02307	0.115	0.00045
YHR005C	GPA1		0	0	0	0	0	0	#NUM!
YHR006W	STP2		1.10941	0.045	1.021	0.04	0.08027	0.044	2e-05
YHR008C	SOD2		0.94698	0.118	0.94976	0.051	-0.00443	0.117	0.00052
YHR009C	TDA3		0.92806	0.112	0.90707	0.074	0.0369	0.111	0.00047
YHR012W	VPS29		0.88003	0.014	0.84487	0.045	0.03485	0.014	8e-05	status=JK
YHR014W	SPO13		0.91167	0.012	0.89222	0.07	0.02948	0.012	0
YHR015W	MIP6		1.02335	0.033	1.07001	0.03	-0.05041	0.033	1e-05
YHR016C	YSC84		1.14346	0.022	1.12961	0.024	0.00207	0.022	0.00013	status=JK
YHR017W	YSC83		0.82587	0.103	0.83308	0.074	0.01021	0.103	0.00053
YHR018C	ARG4		0.48036	0.082	0.50472	0.077	-0.04012	0.082	0.00133
YHR021C	RPS27B		0.70274	0.006	0.82274	0.033	-0.12479	0.005	2e-05	status=JK
YHR021W-A	ECM12		0.95927	0.03	0.99013	0.227	-0.03936	0.03	0.00032	status=JK
YHR022C	YHR022C		1.02908	0.048	0.87984	0.162	0.17691	0.048	0.00074	status=JK
YHR025W	THR1		0.55144	0.065	0.62334	0.024	-0.06938	0.064	0.00044
YHR028C	DAP2		0.96508	0.051	0.95725	0.04	0.00977	0.051	4e-05
YHR029C	YHI9		1.04497	0.02	1.00524	0.04	0.02975	0.02	0.00013	status=JK
YHR030C	SLT2		1.03204	0.015	1.04564	0.036	-0.02034	0.014	7e-05	status=JK
YHR031C	RRM3		1.10018	0.066	1.0771	0.119	0.02484	0.066	6e-05
YHR032W	ERC1		1.08249	0.04	1.10613	0.033	-0.02013	0.04	1e-05
YHR033W	YHR033W		0.98938	0.024	0.99062	0.03	-0.01079	0.024	0
YHR034C	PIH1		0.89898	0.053	1.01057	0.072	-0.11811	0.052	6e-05
YHR035W	YHR035W		1.13789	0.031	0.96702	0.206	0.19272	0.031	0.00025	status=JK
YHR037W	PUT2		0.93086	0.128	0.88416	0.256	0.04886	0.128	0.0007
YHR039C	MSC7		0.97382	0.052	1.02662	0.113	-0.05815	0.052	4e-05
YHR041C	SRB2		0.33164	0.021	0.53356	0.03	-0.21477	0.021	0.00128	status=JK
YHR043C	DOG2		1.00902	0.091	1.0717	0.154	-0.10377	0.091	0.0002
YHR044C	DOG1		0.98036	0.071	0.96176	0.058	0.03681	0.071	0.0001
YHR045W	YHR045W		0.88174	0.181	0.9181	0.107	-0.0393	0.181	0.0023
YHR046C	INM1		0.8845	0.081	0.86668	0.183	0.0626	0.081	0.00021
YHR047C	AAP1		0.96474	0.032	1.022	0.08	-0.03948	0.032	1e-05
YHR048W	YHK8		0.92912	0.066	0.92064	0.048	-0.00262	0.066	0.0001
YHR049C-A	YHR049C-A		1.07407	0.042	1.10073	0.013	-0.02391	0.042	2e-05
YHR049W	FSH1		1.04336	0.008	1.02032	0.029	0.02537	0.008	2e-05	status=JK
YHR050W	SMF2		1.0339	0.045	0.99697	0.035	0.03654	0.044	2e-05
YHR057C	CPR2		0.83866	0.26	1.00894	0.085	-0.16011	0.26	0.00757
YHR059W	FYV4		0	0	0.05184	0.061	-0.04321	0	#NUM!
YHR061C	GIC1		0.11734	0.014	0.33215	0.129	-0.20815	0.013	0.0044	status=JK
YHR066W	SSF1		0.79003	0.04	0.84431	0.012	-0.06083	0.04	3e-05
YHR067W	HTD2		0.73972	0.047	0.76668	0.005	-0.02536	0.047	7e-05
YHR073W	OSH3		1.1035	0.041	1.14138	0.07	-0.02502	0.041	1e-05
YHR075C	PPE1		0.97901	0.035	0.98767	0.036	-0.00975	0.035	1e-05
YHR076W	PTC7		0.95209	0.011	0.95327	0.012	-0.00189	0.011	4e-05	status=JK
YHR077C	NMD2		0.98366	0.005	0.96478	0.031	0.01157	0.005	1e-05	status=JK
YHR078W	YHR078W		1.1427	0.016	1.15639	0.054	-0.01776	0.016	6e-05	status=JK
YHR079C	IRE1		1.11872	0.089	1.10759	0.056	0.0194	0.089	0.00014
YHR079C-B	YHR079C-B		1.12049	0.037	1.07888	0.036	0.04965	0.037	1e-05
YHR080C	YHR080C		1.02066	0.058	1.03693	0.017	-0.01819	0.058	5e-05
YHR081W	LRP1		0.57785	0.07	0.6702	0.025	-0.08749	0.07	0.00048
YHR082C	KSP1		1.00156	0.007	1.03294	0.037	-0.03258	0.007	2e-05	status=JK
YHR086W	NAM8		1.1007	0.013	0.99633	0.068	0.10804	0.013	5e-05	status=JK
YHR087W	RTC3		0.99926	0.007	0.95873	0.143	0.05829	0.007	2e-05	status=JK
YHR092C	HXT4		0.99409	0.017	1.01408	0.019	-0.02101	0.017	0
YHR093W	YHR093W		1.01606	0.004	1.01268	0.026	0.00293	0.004	0	status=JK
YHR094C	HXT1		1.08121	0.035	1.07915	0.021	-0.00098	0.035	1e-05
YHR095W	YHR095W		1.0682	0.032	1.10484	0.004	-0.03868	0.032	0.0003	status=JK
YHR096C	HXT5		0.98612	0.038	1.02205	0.048	-0.03759	0.038	2e-05
YHR097C	YHR097C		0.96976	0.022	0.95965	0.047	0.00985	0.022	0.00017	status=JK
YHR103W	SBE22		0.99592	0.005	0.98526	0.051	0.01489	0.005	1e-05	status=JK
YHR104W	GRE3		1.00821	0.056	1.00588	0.042	0.00219	0.056	5e-05
YHR105W	YPT35		0.99087	0.05	0.99375	0.002	-0.00252	0.05	4e-05
YHR106W	TRR2		1.04198	0.151	1.05967	0.032	-0.02097	0.151	0.00083
YHR108W	GGA2		0.95139	0.025	0.98856	0.041	-0.03122	0.024	0.00022	status=JK
YHR109W	CTM1		1.02642	0.052	0.98622	0.046	0.03147	0.051	3e-05
YHR110W	ERP5		1.08654	0.061	1.06977	0.077	0.00891	0.061	5e-05
YHR111W	UBA4		0.93958	0.046	0.94353	0.016	0.00219	0.046	3e-05
YHR112C	YHR112C		0.995	0.027	1.00356	0.023	0.00416	0.027	1e-05
YHR113W	APE4		0.95178	0.058	0.95518	0.057	-0.00881	0.057	6e-05
YHR114W	BZZ1		1.15925	0.14	1.1019	0.086	0.05318	0.14	0.00048
YHR115C	DMA1		1.04098	0.02	0.98626	0.019	0.05925	0.02	0.00012	status=JK
YHR116W	COX23		0.82634	0.041	0.78383	0.037	0.04719	0.041	3e-05
YHR117W	TOM71		0.99244	0.037	0.97368	0.028	0.02603	0.037	1e-05
YHR121W	LSM12		1.00467	0.09	1.04594	0.1	-0.06099	0.09	0.0002
YHR123W	EPT1		1.05343	0.041	1.07583	0.035	-0.03069	0.041	2e-05
YHR124W	NDT80		0.99549	0.04	1.01136	0.028	-0.01396	0.04	2e-05
YHR125W	YHR125W		1.04786	0.043	1.02353	0.006	0.02412	0.043	2e-05
YHR126C	ANS1		0.96054	0.064	0.9715	0.05	-0.02162	0.064	8e-05
YHR127W	YHR127W		0.91631	0.05	0.9747	0.01	-0.06132	0.05	5e-05
YHR129C	ARP1		0.77876	0.122	0.89362	0.072	-0.09379	0.121	0.00103
YHR130C	YHR130C		1.05996	0.057	1.07786	0.042	-0.01024	0.057	4e-05
YHR131C	YHR131C		0.99058	0.071	0.97998	0.005	0.00981	0.071	0.0001
YHR132C	ECM14		1.07015	0.073	1.02642	0.049	0.04167	0.073	9e-05
YHR132W-A	IGO2		0.98554	0.025	0.9776	0.032	0.00865	0.025	0
YHR133C	NSG1		1.0301	0.076	1.01257	0.016	0.02203	0.075	0.00011
YHR134W	WSS1		0.9442	0.049	0.93028	0.051	0.00861	0.049	4e-05
YHR135C	YCK1		1.03796	0.015	1.0053	0.028	0.03027	0.015	7e-05	status=JK
YHR136C	SPL2		1.06379	0.047	1.05777	0.01	0.00344	0.046	2e-05
YHR137W	ARO9		1.14411	0.003	1.09578	0.074	0.06638	0.003	0	status=JK
YHR138C	YHR138C		1.12226	0.037	1.10375	0.147	0.00134	0.037	1e-05
YHR139C	SPS100		0.99114	0.088	1.02331	0.071	-0.04459	0.088	0.00019
YHR139C-A	YHR139C-A		0.99578	0.111	1.09871	0.011	-0.1049	0.111	0.00038
YHR140W	YHR140W		1.10864	0.024	1.04427	0.003	0.06319	0.024	0.00016	status=JK
YHR142W	CHS7		1.11253	0.069	1.03134	0.076	0.06441	0.069	7e-05
YHR143W	DSE2		0.86092	0.026	0.88716	0.063	-0.01081	0.026	1e-05
YHR146W	CRP1		1.08623	0.059	1.07123	0.028	0.02076	0.059	4e-05
YHR150W	PEX28		1.05553	0.034	1.05426	0.092	-0.00473	0.034	1e-05
YHR151C	MTC6		1.00776	0.017	1.02267	0.051	-0.0159	0.017	0
YHR152W	SPO12		1.05789	0.078	1.10044	0.138	-0.0676	0.078	0.00011
YHR153C	SPO16		1.03105	0.067	0.64855	0.535	0.3146	0.067	7e-05
YHR154W	RTT107		0.93657	0.033	1.03608	0.063	-0.09434	0.033	0.00041	status=JK
YHR155W	YSP1		1.05743	0.09	1.2234	0.005	-0.16614	0.09	0.00017
YHR156C	LIN1		0.95826	0.004	0.80096	0.042	0.13541	0.004	0	status=JK
YHR157W	REC104		1.05272	0.106	1.10463	0.081	-0.05745	0.106	0.00028
YHR158C	KEL1		0.89764	0.056	0.85497	0.186	-0.01221	0.056	7e-05
YHR159W	TDA11		0.96923	0.016	0.9004	0.121	0.05312	0.016	9e-05	status=JK
YHR160C	PEX18		1.09722	0.06	1.0551	0.065	0.05177	0.06	4e-05
YHR161C	YAP1801		0.9941	0.088	0.97037	0.15	-0.0033	0.088	0.00019
YHR162W	MPC2		0.85786	0.071	0.97305	0.028	-0.11833	0.07	0.00015
YHR163W	SOL3		1.00391	0.029	0.93634	0.067	0.05842	0.029	0.00027	status=JK
YHR167W	THP2		1.0476	0.029	1.0286	0.037	0.00655	0.029	1e-05
YHR171W	ATG7		1.03683	0.036	0.99007	0.033	0.04996	0.036	1e-05
YHR176W	FMO1		1.07916	0.015	1.09259	0.033	-0.01891	0.015	0
YHR178W	STB5		0.76514	0.03	0.71365	0.013	0.05821	0.03	2e-05
YHR179W	OYE2		1.04013	0.05	1.02649	0.058	0.01668	0.049	3e-05
YHR180W	YHR180W		1.14605	0.008	1.16255	0.057	-0.00162	0.008	2e-05	status=JK
YHR181W	SVP26		1.06908	0.032	1.1117	0.038	-0.0439	0.032	0.00029	status=JK
YHR182W	YHR182W		1.06982	0.112	1.08371	0.157	-0.05279	0.111	0.00031
YHR184W	SSP1		1.0527	0.107	1.1871	0.07	-0.14601	0.106	0.00028
YHR185C	PFS1		1.01313	0.051	1.05661	0.038	-0.03566	0.051	4e-05
YHR189W	PTH1		0.87368	0.01	0.86523	0.039	0.00886	0.01	4e-05	status=JK
YHR191C	CTF8		0.97182	0.055	0.96448	0.043	-0.0028	0.055	5e-05
YHR193C	EGD2		0	0	0	0	0	0	#NUM!	status=JK
YHR194W	MDM31		0.00021	0	0.11508	0.014	-0.10779	0	0.42265	status=JK
YHR195W	NVJ1		1.06322	0.07	1.01167	0.028	0.05241	0.07	8e-05
YHR198C	AIM18		0.86934	0.063	0.83477	0.009	0.03135	0.063	0.0001
YHR199C	AIM46		1.01438	0.058	1.01021	0.034	0.00217	0.058	5e-05
YHR200W	RPN10		0.79585	0.011	0.86238	0.003	-0.06497	0.011	7e-05	status=JK
YHR202W	YHR202W		0.99096	0.009	0.85033	0.029	0.14042	0.009	3e-05	status=JK
YHR203C	RPS4B		0.65284	0.088	0.71636	0.132	-0.06403	0.088	0.00066
YHR204W	MNL1		1.05436	0.014	1.04681	0.01	0.00534	0.014	5e-05	status=JK
YHR206W	SKN7		1.04922	0.041	1.06109	0.019	-0.0082	0.041	2e-05
YHR207C	SET5		1.01621	0.011	1.01388	0.046	0.00099	0.011	4e-05	status=JK
YHR209W	CRG1		1.02104	0.035	1.02994	0.018	-0.00841	0.035	1e-05
YHR210C	YHR210C		0.9808	0.016	0.9736	0.035	0.00322	0.016	0
YIL001W	YIL001W		0.87564	0.104	0.93394	0.078	-0.05132	0.103	0.00045
YIL002C	INP51		0.97864	0.037	0.97775	0.014	0.00057	0.037	1e-05
YIL005W	EPS1		1.0515	0.03	1.04381	0.012	0.00982	0.03	1e-05
YIL006W	YIA6		0.95702	0.028	0.90683	0.045	0.04693	0.028	1e-05
YIL007C	NAS2		0.98064	0.027	0.97229	0.083	0.01691	0.027	1e-05
YIL008W	URM1		0.80096	0.011	0.89008	0.108	-0.11228	0.011	7e-05	status=JK
YIL009C-A	EST3		1.03565	0.043	1.04702	0.026	-0.01587	0.043	2e-05
YIL010W	DOT5		1.02438	0.065	1.00568	0.047	0.01951	0.065	7e-05
YIL011W	TIR3		0	0	0.04529	0.078	0	0	#NUM!
YIL012W	YIL012W		0.98554	0.111	1.05774	0.055	-0.09936	0.111	0.00039
YIL013C	PDR11		1.12025	0.022	1.06498	0.099	0.05895	0.022	0
YIL014W	MNT3		1.08747	0.073	1.0061	0.106	0.07267	0.073	8e-05
YIL015C-A	YIL015C-A		0.96454	0.093	1.02592	0.007	-0.0584	0.093	0.00025
YIL015W	BAR1		0.97256	0.04	0.96347	0.044	0.00209	0.04	0.00056	status=JK
YIL016W	SNL1		1.11509	0.06	1.0751	0.033	0.04066	0.06	4e-05
YIL017C	VID28		0.99757	0.004	0.96101	0.131	0.02153	0.004	0	status=JK
YIL020C	HIS6		0.46671	0.081	0.532	0.04	-0.0611	0.081	0.00139
YIL023C	YKE4		1.02809	0.04	1.00875	0.023	0.02354	0.04	2e-05
YIL024C	YIL024C		1.05691	0.011	1.10649	0.028	-0.05471	0.011	3e-05	status=JK
YIL025C	YIL025C		0.99714	0.019	0.97447	0.03	0.01795	0.019	0
YIL027C	EMC5		1.06895	0.025	1.08394	0.062	-0.02048	0.025	0
YIL028W	YIL028W		0.98808	0.012	0.97004	0.04	0.01187	0.012	5e-05	status=JK
YIL029C	YIL029C		1.02462	0.015	1.07036	0.049	-0.03116	0.015	7e-05	status=JK
YIL030C	SSM4		0.95779	0.123	1.0314	0.021	-0.08237	0.123	0.00058
YIL032C	YIL032C		0.9999	0.051	0.99041	0.02	0.01468	0.051	4e-05
YIL034C	CAP2		0.94776	0.044	0.99294	0.059	-0.06015	0.044	3e-05
YIL035C	CKA1		0.97438	0.011	1.03277	0.085	-0.04493	0.011	4e-05	status=JK
YIL036W	CST6		0.92906	0.072	0.92938	0.099	0.01209	0.072	0.00013
YIL037C	PRM2		0.98852	0.03	0.97075	0.013	0.01527	0.03	1e-05
YIL038C	NOT3		0.98241	0.028	0.96726	0.035	0.01266	0.027	1e-05
YIL039W	TED1		1.00007	0.032	0.99616	0.03	0.00664	0.032	1e-05
YIL040W	APQ12		0.35892	0.046	0.33775	0.076	0.03593	0.046	0.00059
YIL041W	GVP36		0.96732	0.094	1.0214	0.018	-0.06242	0.094	0.00025
YIL042C	PKP1		0.96798	0.088	0.97569	0.018	-0.00832	0.088	0.00021
YIL043C	CBR1		1.20417	0.04	1.12786	0.093	0.09488	0.04	0.00038	status=JK
YIL044C	AGE2		0.91842	0.046	0.89583	0.046	0.01371	0.046	4e-05
YIL045W	PIG2		1.01564	0.074	1.01844	0.077	-0.01577	0.074	0.00011
YIL047C	SYG1		1.08857	0.024	1.09227	0.027	0.00051	0.024	0
YIL049W	DFG10		1.048	0.03	1.03759	0.037	0.01212	0.03	1e-05
YIL050W	PCL7		1.01115	0.026	1.01865	0.035	0.00158	0.026	0
YIL052C	RPL34B		1.00953	0.025	0.91928	0.146	0.05311	0.025	0
YIL053W	RHR2		0.74847	0.118	0.93828	0.04	-0.18301	0.118	0.00106
YIL054W	YIL054W		0.99712	0.068	0.99429	0.151	-0.0252	0.068	9e-05
YIL055C	YIL055C		0.98818	0.081	0.75313	0.121	0.25172	0.081	0.00015
YIL056W	VHR1		0.90802	0.031	0.9494	0.021	-0.02963	0.031	0.00038	status=JK
YIL057C	RGI2		1.01916	0.051	0.94317	0.128	0.0334	0.051	4e-05
YIL058W	YIL058W		1.00303	0.06	0.88658	0.184	0.07093	0.06	6e-05
YIL059C	YIL059C		1.07136	0.043	1.10096	0.027	-0.04262	0.043	2e-05
YIL060W	YIL060W		1.0317	0.076	0.91423	0.125	0.14288	0.076	0.00011
YIL064W	SEE1		0.90702	0.021	0.89239	0.118	-0.0137	0.021	0.00017	status=JK
YIL065C	FIS1		0.89718	0.032	0.94276	0.01	-0.05142	0.032	1e-05
YIL066C	RNR3		1.03444	0.021	1.05861	0.024	-0.01906	0.021	0
YIL067C	YIL067C		0.87273	0.06	0.97351	0.031	-0.10583	0.06	9e-05
YIL070C	MAM33		1.04565	0.043	1.03048	0.02	0.00933	0.043	2e-05
YIL071C	PCI8		0.9997	0.014	1.08602	0.026	-0.08102	0.014	7e-05	status=JK
YIL072W	HOP1		1.02892	0.075	1.03625	0.037	-0.01699	0.075	0.00011
YIL073C	SPO22		1.02402	0.02	0.91765	0.081	0.10729	0.02	0.00012	status=JK
YIL074C	SER33		1.01459	0.027	1.00489	0.038	0.01367	0.027	1e-05
YIL076W	SEC28		0.95558	0.041	0.94932	0.061	0.00419	0.041	2e-05
YIL077C	YIL077C		0.97843	0.124	0.93038	0.095	0.03725	0.123	0.00055
YIL079C	AIR1		0.98254	0.026	1.05478	0.038	-0.07339	0.026	0.00024	status=JK
YIL084C	SDS3		0.81146	0.023	0.78547	0.026	0.03218	0.023	1e-05
YIL085C	KTR7		0.96656	0.053	0.95225	0.091	0.02206	0.053	5e-05
YIL086C	YIL086C		0.95661	0.011	0.90448	0.044	0.04782	0.011	4e-05	status=JK
YIL087C	AIM19		1.02864	0.018	0.99349	0.006	0.03414	0.018	0.0001	status=JK
YIL088C	AVT7		1.06983	0.006	1.01824	0.004	0.04923	0.006	1e-05	status=JK
YIL089W	YIL089W		1.10547	0.083	1.10463	0.067	0.01209	0.083	0.00011
YIL090W	ICE2		0.63484	0.052	0.56989	0.085	0.04589	0.052	0.00015
YIL092W	YIL092W		0.95265	0.058	0.90479	0.002	0.04625	0.058	6e-05
YIL093C	RSM25		1.02836	0.025	1.02659	0.019	0.00051	0.025	0
YIL094C	LYS12		0.62561	0.005	0.69185	0.039	-0.06823	0.005	2e-05	status=JK
YIL095W	PRK1		1.02239	0.026	1.02839	0.028	-0.00945	0.026	0.00022	status=JK
YIL096C	YIL096C		1.03659	0.053	1.07514	0.107	-0.04348	0.053	4e-05
YIL097W	FYV10		0.91849	0.04	0.98165	0.014	-0.06019	0.04	2e-05
YIL098C	FMC1		0.97376	0.036	0.9441	0.02	0.02828	0.036	1e-05
YIL099W	SGA1		1.06125	0.011	1.06918	0.022	-0.00597	0.011	0
YIL100W	YIL100W		1.02591	0.053	0.99948	0.011	0.02098	0.053	0.00088	status=JK
YIL101C	XBP1		1.01334	0.024	1.01732	0.008	-0.00888	0.023	0
YIL102C	YIL102C		1.04254	0.052	1.06489	0.017	-0.01684	0.052	3e-05
YIL103W	DPH1		0.99702	0.084	1.02222	0.055	-0.02468	0.084	0.00016
YIL105C	SLM1		1.04236	0.154	1.07653	0.014	-0.03776	0.154	0.00088
YIL107C	PFK26		0.94905	0.174	1.01362	0.035	-0.06238	0.174	0.00166
YIL108W	YIL108W		1.07686	0.03	1.02447	0.017	0.05301	0.03	0.00027	status=JK
YIL110W	HPM1		0.73474	0.006	0.76714	0.027	-0.03222	0.006	2e-05	status=JK
YIL111W	COX5B		0.8558	0.105	0.91517	0.045	-0.05828	0.105	0.0005
YIL112W	HOS4		0.90167	0.101	0.97915	0.09	-0.07463	0.1	0.00038
YIL113W	SDP1		0.95588	0.071	0.90423	0.148	0.05819	0.071	0.00011
YIL114C	POR2		1.05275	0.031	0.99884	0.027	0.04688	0.031	1e-05
YIL116W	HIS5		0.5658	0.1	0.66066	0.047	-0.09253	0.099	0.00146
YIL117C	PRM5		1.03608	0.026	1.0253	0.055	0.02011	0.026	0
YIL119C	RPI1		1.06593	0.005	1.0072	0.017	0.06164	0.005	1e-05	status=JK
YIL120W	QDR1		0.95375	0.054	1.03611	0.031	-0.08102	0.054	5e-05
YIL122W	POG1		0.79371	0.048	0.92605	0.083	-0.12466	0.048	0.00123	status=JK
YIL123W	SIM1		0.97317	0.07	1.04855	0.007	-0.07958	0.07	0.0001
YIL124W	AYR1		0.97331	0.061	0.97693	0.054	-0.00304	0.061	7e-05
YIL125W	KGD1		0.00519	0.005	0.01235	0.021	0.00458	0.005	0.14476
YIL128W	MET18		0.84492	0.064	0.83943	0.019	0.00424	0.063	0.00012
YIL130W	ASG1		1.08271	0.016	1.0592	0.011	0.02626	0.016	0
YIL131C	FKH1		0.94389	0.071	1.00215	0.05	-0.07113	0.071	0.00012
YIL132C	CSM2		0.94711	0.017	0.91041	0.133	0.02514	0.017	0.0001	status=JK
YIL133C	RPL16A		0.87184	0.06	0.78203	0.144	0.05765	0.06	9e-05
YIL134W	FLX1		0.72039	0.018	0.67185	0.057	0.03255	0.018	0
YIL135C	VHS2		1.09859	0.035	1.14284	0.038	-0.04413	0.035	1e-05
YIL136W	OM45		1.06983	0.073	1.03703	0.084	0.01986	0.073	9e-05
YIL137C	TMA108		0.99999	0.005	0.84225	0.145	0.12881	0.005	1e-05	status=JK
YIL138C	TPM2		0.96071	0.045	0.97828	0.053	-0.0093	0.045	3e-05
YIL139C	REV7		0.99345	0.074	0.92584	0.093	0.04882	0.074	0.00011
YIL140W	AXL2		1.00696	0.174	1.10143	0.066	-0.08637	0.174	0.0014
YIL141W	YIL141W		1.06738	0.007	1.08881	0.049	-0.02354	0.007	1e-05	status=JK
YIL145C	PAN6		1.09333	0.034	0.98047	0.079	0.11567	0.034	1e-05
YIL146C	ATG32		0.97227	0.088	0.96651	0.078	0.00267	0.088	0.00021
YIL148W	RPL40A		1.00985	0.056	0.97704	0.013	0.02808	0.056	5e-05
YIL149C	MLP2		1.04771	0.018	1.02404	0.066	0.03457	0.018	0
YIL151C	YIL151C		0.95108	0.026	0.94932	0.069	-0.01195	0.026	1e-05
YIL152W	YIL152W		0.9857	0.005	0.97704	0.025	0.00101	0.005	1e-05	status=JK
YIL153W	RRD1		0.91498	0.038	0.89511	0.026	0.01945	0.038	2e-05
YIL154C	IMP2'		0.86477	0.022	0.83508	0.059	0.02819	0.022	0
YIL155C	GUT2		1.07867	0.022	1.01844	0.065	0.05608	0.022	0
YIL156W	UBP7		1.0128	0.069	1.09753	0.076	-0.09958	0.069	9e-05
YIL157C	COA1		1.00317	0.077	1.0366	0.013	-0.02999	0.076	0.00012
YIL158W	AIM20		1.07332	0.082	1.06296	0.065	0.02824	0.082	0.00012
YIL159W	BNR1		0.82009	0.172	0.96476	0.156	-0.12703	0.172	0.00245
[truncated: 2,323 more rows]

## Sheet: DAM U Rep2
Array ORF	Array Name	Array annotation	Normalized colony size (EXPERIMENT)	Normalized colony std. dev. (EXPERIMENT)	Normalized colony size (CONTROL)	Normalized colony std. dev. (CONTROL)	Score	Score stdev	p-Value	Additional information
YAL002W	VPS8		0.69998	0.113	0.92118	0.039	-0.21533	0.113	0.00113
YAL004W	YAL004W		1.08056	0.035	1.09141	0.026	-0.00382	0.034	1e-05
YAL005C	SSA1		1.00175	0.011	1.00953	0.027	-0.00693	0.011	4e-05	status=JK
YAL007C	ERP2		1.09348	0.128	1.09033	0.036	-0.00724	0.128	0.00043
YAL008W	FUN14		1.2323	0.083	1.21147	0.055	0.0303	0.083	8e-05
YAL010C	MDM10		0.7392	0.026	0.73528	0.016	0.00487	0.026	1e-05
YAL011W	SWC3		0.98761	0.06	0.90012	0.04	0.08775	0.06	6e-05
YAL013W	DEP1		0.77763	0.064	0.69857	0.027	0.08224	0.064	0.00015
YAL014C	SYN8		1.01812	0.086	1.01807	0.083	0.0074	0.085	0.00016
YAL015C	NTG1		1.08445	0.096	1.03529	0.086	0.05522	0.096	0.00019
YAL017W	PSK1		1.01526	0.014	1.00358	0.023	0.01111	0.014	7e-05	status=JK
YAL018C	YAL018C		0.9632	0.105	0.9924	0.079	-0.02604	0.105	0.00035
YAL019W	FUN30		0.89182	0.058	0.93428	0.037	-0.04386	0.058	7e-05
YAL020C	ATS1		0.91261	0.039	0.95253	0.042	-0.03295	0.039	2e-05
YAL022C	FUN26		1.00378	0.017	0.88887	0.014	0.11221	0.017	0.0001	status=JK
YAL023C	PMT2		1.09794	0.08	1.07477	0.019	0.02169	0.08	0.00011
YAL024C	LTE1		0.71322	0.138	0.78011	0.092	-0.05979	0.138	0.00193
YAL026C	DRS2		0.67412	0.003	0.65498	0.024	0.02871	0.003	1e-05	status=JK
YAL027W	SAW1		0.9961	0.089	0.95753	0.002	0.03878	0.089	0.0002
YAL028W	FRT2		0.94074	0.072	0.95718	0.027	-0.02329	0.072	0.00012
YAL029C	MYO4		1.07146	0.052	1.09825	0.034	-0.03395	0.052	3e-05
YAL030W	SNC1		0.88962	0.076	0.934	0.042	-0.05047	0.075	0.00017
YAL031C	GIP4		1.11478	0.038	1.09137	0.037	0.0189	0.038	1e-05
YAL034C	FUN19		1.02757	0.013	0.94516	0.077	0.086	0.013	5e-05	status=JK
YAL036C	RBG1		1.10801	0.03	1.05115	0.014	0.06335	0.03	1e-05
YAL037W	YAL037W		1.14639	0.062	1.09548	0.038	0.0517	0.062	4e-05
YAL040C	CLN3		0.91347	0.004	0.90964	0.046	-0.00558	0.004	1e-05	status=JK
YAL042W	ERV46		1.00729	0.026	1.11206	0.005	-0.10244	0.026	0.00022	status=JK
YAL043C-A	YAL043C-A		0.89276	0.086	0.95776	0.034	-0.06897	0.086	0.00025
YAL045C	YAL045C		1.07812	0.056	1.0715	0.046	0.01645	0.056	4e-05
YAL046C	AIM1		1.00877	0.022	1.17032	0.024	-0.14842	0.022	0
YAL048C	GEM1		0.87306	0.027	0.95757	0.01	-0.07991	0.027	1e-05
YAL049C	AIM2		0.99247	0.033	0.96304	0.04	0.02739	0.033	1e-05
YAL051W	OAF1		0.85988	0.057	0.85272	0.028	0.00964	0.057	8e-05
YAL053W	FLC2		0.97677	0.104	0.98073	0.086	-0.01099	0.104	0.00033
YAL054C	ACS1		1.05057	0.027	1.08197	0.084	-0.04401	0.027	0
YAL055W	PEX22		1.00102	0.046	0.87742	0.074	0.11091	0.046	3e-05
YAL056W	GPB2		1.0546	0.009	0.96791	0.089	0.06244	0.009	3e-05	status=JK
YAL058C-A	YAL058C-A		0.85061	0.014	0.94588	0.043	-0.09011	0.014	9e-05	status=JK
YAL058W	CNE1		0.92326	0.082	0.95414	0.046	-0.03361	0.082	0.00019
YAL059W	ECM1		0.98648	0.052	1.00567	0.043	-0.01596	0.052	4e-05
YAL060W	BDH1		1.13364	0.027	1.11764	0.035	0.01257	0.027	0
YAL061W	BDH2		0.98345	0.116	1.00697	0.019	-0.02796	0.116	0.00045
YAL062W	GDH3		1.26197	0.092	1.06152	0.039	0.20711	0.092	0.00011
YAL064C-A	TDA8		1.10588	0.169	1.08502	0.08	0.00749	0.168	0.00096
YAL065C	YAL065C		1.09629	0.083	1.11298	0.025	-0.01077	0.083	0.00012
YAL066W	YAL066W		1.02203	0.07	1.03422	0.072	-0.00674	0.07	9e-05
YAL067C	SEO1		0.98074	0.119	1.02356	0.059	-0.04765	0.119	0.00048
YAL068C	PAU8		1.0183	0.051	0.97007	0.003	0.04818	0.051	3e-05
YAR002C-A	ERP1		1.04303	0.105	1.0315	0.057	-0.00417	0.105	0.00028
YAR002W	NUP60		1.08441	0.065	1.04924	0.029	0.03185	0.065	6e-05
YAR003W	SWD1		0.89777	0.032	0.82718	0.048	0.08112	0.032	0.00043	status=JK
YAR014C	BUD14		0.649	0.129	0.77188	0.039	-0.12175	0.129	0.00208
YAR015W	ADE1		1.09848	0.091	1.02341	0.028	0.08062	0.091	0.00015
YAR018C	KIN3		0.81075	0.127	0.64368	0.083	0.16988	0.126	0.00103
YAR020C	PAU7		0.91903	0.072	0.94719	0.061	-0.03968	0.072	0.00013
YAR023C	YAR023C		1.12621	0.043	1.12911	0.058	-0.01528	0.043	2e-05
YAR027W	UIP3		0.96477	0.016	0.93738	0.047	0.03752	0.016	9e-05	status=JK
YAR028W	YAR028W		1.03568	0.023	1.02131	0.063	0.00806	0.023	0
YAR029W	YAR029W		0.92806	0.04	0.96599	0.041	-0.03902	0.04	2e-05
YAR030C	YAR030C		1.04918	0.027	1.05017	0.031	-0.00494	0.027	0
YAR031W	PRM9		1.04096	0.01	1.04078	0.037	-0.00879	0.01	3e-05	status=JK
YAR035W	YAT1		1.04456	0.038	1.02757	0.055	0.01003	0.038	1e-05
YAR037W	YAR037W		1.17264	0.113	1.1424	0.066	0.03879	0.112	0.00024
YAR040C	YAR040C		0.92861	0.154	0.93773	0.051	-0.00698	0.154	0.00124
YAR042W	SWH1		0.9541	0.037	1.00382	0.07	-0.05656	0.037	2e-05
YAR043C	YAR043C		1.10997	0.078	1.05952	0.017	0.0413	0.078	0.0001
YAR044W	YAR044W		1.01917	0.019	1.01838	0.026	0.00418	0.019	0.00011	status=JK
YAR047C	YAR047C		1.00507	0.019	0.95595	0.053	0.03689	0.019	0.00012	status=JK
YAR050W	FLO1		1.14976	0.04	1.13108	0.017	0.02175	0.04	1e-05
YBL001C	ECM15		1.19066	0.02	1.11208	0.019	0.08287	0.02	0
YBL003C	HTA2		1.09036	0.04	1.08356	0.029	-0.01032	0.04	0.00045	status=JK
YBL005W	PDR3		1.14438	0.033	1.06906	0.01	0.07288	0.033	0.00028	status=JK
YBL007C	SLA1		0.67219	0.03	0.73452	0.023	-0.06247	0.03	3e-05
YBL008W	HIR1		0.87784	0.119	0.98257	0.028	-0.1103	0.118	0.00067
YBL009W	ALK2		0.92459	0.146	0.8261	0.098	0.07962	0.146	0.00106
YBL010C	YBL010C		1.08272	0.195	1.01208	0.045	0.07362	0.194	0.00156
YBL011W	SCT1		0.59344	0.016	0.63843	0.023	-0.04305	0.016	0.00025	status=JK
YBL013W	FMT1		1.07614	0.118	0.95316	0.058	0.12004	0.118	0.00036
YBL015W	ACH1		1.08597	0.09	1.05455	0.076	0.02203	0.09	0.00015
YBL016W	FUS3		0.83022	0.117	0.92985	0.1	-0.08074	0.117	0.00075
YBL017C	PEP1		1.10279	0.137	1.05941	0.084	0.05556	0.137	0.00052
YBL019W	APN2		1.02835	0.068	1.02496	0.013	0.0016	0.067	8e-05
YBL021C	HAP3		1.01692	0.062	0.71774	0.012	0.29986	0.062	6e-05
YBL024W	NCL1		1.12328	0.078	0.9529	0.044	0.16608	0.078	9e-05
YBL025W	RRN10		0.61508	0.042	0.65071	0.005	-0.03758	0.042	9e-05
YBL027W	RPL19B		0.67223	0.085	0.58442	0.023	0.08828	0.085	0.0053	status=JK
YBL028C	YBL028C		1.09545	0.103	1.05258	0.013	0.03816	0.103	0.00023
YBL029W	YBL029W		1.19628	0.152	1.12049	0.019	0.0671	0.152	0.00056
YBL031W	SHE1		0.03347	0.039	0.22657	0.038	-0.18614	0.038	0.18098
YBL032W	HEK2		1.05639	0.094	1.01619	0.012	0.04241	0.094	0.00019
YBL036C	YBL036C		1.04271	0.05	0.96499	0.036	0.0788	0.05	0.00077	status=JK
YBL037W	APL3		0.88571	0.041	0.92867	0.059	-0.04203	0.041	3e-05
YBL039C	URA7		0.85862	0.045	0.82894	0.046	0.02517	0.045	4e-05
YBL042C	FUI1		1.12689	0.058	1.10704	0.032	0.02423	0.058	4e-05
YBL043W	ECM13		1.05994	0.061	1.10257	0.014	-0.04273	0.061	5e-05
YBL046W	PSY4		1.25132	0.007	1.25244	0.049	0.01231	0.007	1e-05	status=JK
YBL047C	EDE1		1.04757	0.018	0.96416	0.015	0.08283	0.018	0.0001	status=JK
YBL048W	YBL048W		1.15059	0.059	1.13733	0.042	0.02173	0.059	4e-05
YBL049W	MOH1		1.09123	0.095	1.10208	0.01	-0.01001	0.095	0.00018
YBL051C	PIN4		0.85479	0.055	0.89454	0.024	-0.04055	0.054	7e-05
YBL052C	SAS3		1.0419	0.018	1.04618	0.021	0.00098	0.018	0.0001	status=JK
YBL053W	YBL053W		1.00157	0.012	1.03711	0.032	-0.04002	0.012	5e-05	status=JK
YBL054W	TOD6		1.10556	0.061	1.07912	0.032	0.02997	0.061	5e-05
YBL055C	YBL055C		0.88966	0.015	0.87196	0.023	0.0093	0.015	0
YBL056W	PTC3		1.03523	0.016	1.05134	0.033	-0.01637	0.016	8e-05	status=JK
YBL057C	PTH2		1.06974	0.024	1.12265	0.045	-0.06121	0.024	0.00017	status=JK
YBL059W	YBL059W		0.95315	0.018	0.89887	0.009	0.05545	0.018	0.00012	status=JK
YBL060W	YEL1		0.92419	0.06	0.92269	0.075	0.01384	0.059	7e-05
YBL061C	SKT5		1.02125	0.049	1.00802	0.025	0.01049	0.049	3e-05
YBL062W	YBL062W		1.05377	0.021	1.04399	0.004	0.00718	0.021	0
YBL063W	KIP1		0.91862	0.023	1.08243	0.043	-0.17794	0.023	0.00021	status=JK
YBL064C	PRX1		0.99818	0.019	0.9828	0.023	0.0151	0.019	0
YBL065W	YBL065W		0.96081	0.022	1.00614	0.017	-0.05016	0.022	0
YBL066C	SEF1		0.77149	0.054	0.87391	0.069	-0.10917	0.054	9e-05
YBL067C	UBP13		1.09986	0.031	1.11459	0.051	-0.02822	0.031	0.00026	status=JK
YBL068W	PRS4		1.04139	0.051	1.06143	0.048	-0.0251	0.051	3e-05
YBL069W	AST1		1.04179	0.031	0.98741	0.063	0.04614	0.031	0.00029	status=JK
YBL070C	YBL070C		1.01182	0.02	0.92285	0.052	0.09669	0.02	0
YBL071C	YBL071C		0.80596	0.112	0.98132	0.025	-0.16915	0.112	0.00073
YBL072C	RPS8A		0.28182	0.154	0.43958	0.066	-0.17376	0.154	0.03518
YBL075C	SSA3		1.03646	0.01	1.06219	0.062	-0.03844	0.01	3e-05	status=JK
YBL078C	ATG8		0.89619	0.113	0.97852	0.013	-0.08614	0.113	0.00055
YBL079W	NUP170		0.37113	0.061	0.67836	0.044	-0.30876	0.061	0.00119
YBL081W	YBL081W		0.80799	0.118	0.8473	0.041	-0.04757	0.117	0.00083
YBL082C	ALG3		1.19274	0.046	1.13264	0.089	0.06409	0.046	2e-05
YBL083C	YBL083C		1.16321	0.047	1.06606	0.019	0.09187	0.047	2e-05
YBL085W	BOI1		1.07322	0.029	1.04989	0.021	0.02438	0.028	1e-05
YBL086C	YBL086C		1.11806	0.092	1.08586	0.064	0.03426	0.092	0.00015
YBL087C	RPL23A		0.82781	0.117	0.94026	0.04	-0.1102	0.116	0.00076
YBL088C	TEL1		1.38151	0.118	1.21935	0.047	0.15261	0.118	0.00017
YBL089W	AVT5		0.82399	0.037	0.91375	0.063	-0.09536	0.037	3e-05
YBL091C	MAP2		1.11702	0.063	1.11632	0.074	-0.00801	0.063	5e-05
YBL091C-A	SCS22		0.88071	0.106	0.94941	0.038	-0.06345	0.106	0.00048
YBL094C	YBL094C		0.58159	0.213	0.51549	0.265	-0.00744	0.213	0.01212
YBL095W	YBL095W		0.98205	0.062	0.96853	0.035	0.02102	0.062	7e-05
YBL096C	YBL096C		0.93087	0.065	0.99175	0.062	-0.07586	0.065	9e-05
YBL098W	BNA4		0.90523	0.005	0.88087	0.067	0.01888	0.005	1e-05	status=JK
YBL100C	YBL100C		1.01748	0.052	1.00815	0.055	0.00588	0.052	4e-05
YBL101C	ECM21		1.07237	0.033	1.03813	0.005	0.03336	0.033	1e-05
YBL102W	SFT2		0.92717	0.123	0.99299	0.032	-0.07082	0.123	0.00063
YBL103C	RTG3		0.42517	0.047	0.54101	0.019	-0.12427	0.047	0.00037
YBL103C	RTG3		0.83711	0.15	0.90835	0.092	-0.08889	0.15	0.00154
YBL104C	SEA4		1.07479	0.186	0.96507	0.215	0.06724	0.186	0.0014
YBL106C	SRO77		0.9806	0.106	0.96351	0.058	0.00806	0.106	0.00035
YBL107C	MIC23		1.07633	0.078	1.06529	0.094	-0.00932	0.078	0.0001
YBR001C	NTH2		0.97092	0.076	0.96771	0.053	0.00443	0.076	0.00013
YBR005W	RCR1		1.13259	0.075	1.15925	0.043	-0.03301	0.075	8e-05
YBR006W	UGA2		1.03608	0.065	1.06447	0.039	-0.01749	0.065	7e-05
YBR007C	DSF2		1.05433	0.05	1.03376	0.043	0.0246	0.05	3e-05
YBR008C	FLR1		0.99508	0.115	1.03116	0.051	-0.02846	0.115	0.00042
YBR009C	HHF1		0.71182	0.037	0.79247	0.084	-0.10921	0.037	0.0009	status=JK
YBR010W	HHT1		0.68052	0.075	0.77793	0.102	-0.09914	0.075	0.00036
YBR012C	YBR012C		0.81822	0.164	0.92265	0.044	-0.10344	0.163	0.00213
YBR013C	YBR013C		0.98399	0.179	1.01809	0.017	-0.03408	0.178	0.00161
YBR014C	GRX7		0.97253	0.081	0.971	0.032	0.00711	0.081	0.00016
YBR015C	MNN2		0.86799	0.026	0.87527	0.066	-0.02789	0.026	0.0003	status=JK
YBR016W	YBR016W		1.33053	0.099	1.23307	0.106	0.11178	0.099	0.00011
YBR018C	GAL7		0.94957	0.079	0.99874	0.056	-0.04121	0.079	0.00016
YBR019C	GAL10		0.96056	0.043	0.93782	0.084	0.01308	0.043	2e-05
YBR020W	GAL1		1.17457	0.088	1.08717	0.097	0.07896	0.088	0.00012
YBR020W	GAL1		1.00618	0.061	1.01966	0.091	-0.02318	0.061	6e-05
YBR022W	POA1		0.89979	0.047	0.95621	0.02	-0.06044	0.047	4e-05
YBR023C	CHS3		0.97271	0.02	0.9395	0.027	0.03526	0.02	0
YBR024W	SCO2		1.08779	0.012	0.93544	0.021	0.14658	0.012	4e-05	status=JK
YBR025C	OLA1		0.91745	0.042	0.8914	0.036	0.01685	0.042	3e-05
YBR026C	ETR1		0.72115	0.009	0.80342	0.06	-0.08156	0.009	0
YBR027C	YBR027C		1.20379	0.047	1.21498	0.064	-0.01612	0.047	2e-05
YBR028C	YPK3		1.02989	0.042	1.11042	0.028	-0.07769	0.042	2e-05
YBR030W	RKM3		1.11969	0.033	1.15577	0.044	-0.03977	0.033	1e-05
YBR031W	RPL4A		1.0753	0.052	1.073	0.05	0.00253	0.052	3e-05
YBR032W	YBR032W		1.01648	0.078	1.02453	0.096	-0.00995	0.078	0.00013
YBR033W	EDS1		1.0312	0.064	1.02583	0.026	0.00301	0.064	7e-05
YBR034C	HMT1		1.03679	0.009	1.01802	0.022	0.02007	0.009	2e-05	status=JK
YBR036C	CSG2		0.59152	0.032	0.61433	0.027	-0.03623	0.032	4e-05
YBR040W	FIG1		1.27931	0.032	1.23406	0.028	0.05042	0.032	0
YBR041W	FAT1		0.97806	0.052	1.06754	0.032	-0.08957	0.052	4e-05
YBR042C	CST26		1.03582	0.03	1.0512	0.031	-0.0186	0.03	1e-05
YBR043C	QDR3		0.96245	0.031	0.98556	0.043	-0.01757	0.031	0.00035	status=JK
YBR044C	TCM62		0.86316	0.028	0.89103	0.016	-0.03397	0.028	1e-05
YBR045C	GIP1		0.93019	0.062	0.99799	0.022	-0.064	0.062	8e-05
YBR046C	ZTA1		1.0041	0.077	1.0343	0.02	-0.03656	0.077	0.00012
YBR047W	FMP23		0.89718	0.068	0.9564	0.016	-0.05815	0.068	0.00012
YBR048W	RPS11B		0.82044	0.087	0.87631	0.059	-0.04225	0.087	0.00033
YBR050C	REG2		0.96518	0.078	0.98688	0.009	-0.02385	0.077	0.00014
YBR051W	YBR051W		1.14158	0.024	1.12084	0.022	0.0178	0.024	0
YBR052C	RFS1		0.9321	0.008	1.00483	0.035	-0.07353	0.008	2e-05	status=JK
YBR053C	YBR053C		1.24306	0.033	1.17278	0.066	0.0763	0.033	0.00023	status=JK
YBR054W	YRO2		1.02488	0.162	1.0491	0.067	-0.02452	0.161	0.00106
YBR056W	YBR056W		0.89111	0.089	1.01562	0.009	-0.12202	0.089	0.00028
YBR057C	MUM2		0.82103	0.066	0.82846	0.014	-0.00495	0.066	0.00014
YBR058C	UBP14		0.91479	0.068	0.95092	0.015	-0.03997	0.068	0.00011
YBR059C	AKL1		0.86023	0.075	0.94	0.019	-0.08753	0.075	0.00018
YBR061C	TRM7		1.03584	0.065	1.07373	0.005	-0.03897	0.065	7e-05
YBR061C	TRM7		0.7229	0.084	0.7824	0.121	-0.0908	0.084	0.00043
YBR062C	YBR062C		0.99202	0.075	0.96108	0.011	0.0291	0.075	0.00012
YBR063C	YBR063C		1.02906	0.057	1.04396	0.008	-0.01214	0.057	5e-05
YBR064W	YBR064W		1.2081	0.013	1.19101	0.074	-1e-05	0.013	0
YBR065C	ECM2		1.14003	0.069	1.1323	0.007	0.00883	0.069	6e-05
YBR066C	NRG2		1.11691	0.05	1.18439	0.063	-0.05631	0.05	3e-05
YBR067C	TIP1		0.8696	0.033	0.91717	0.068	-0.04572	0.033	0.00049	status=JK
YBR068C	BAP2		1.13512	0.017	1.06745	0.036	0.07414	0.017	8e-05	status=JK
YBR069C	TAT1		1.14609	0.14	1.14972	0.017	-0.00058	0.14	0.0005
YBR071W	YBR071W		0.88717	0.043	0.85132	0.018	0.03567	0.043	3e-05
YBR072W	HSP26		1.07032	0.062	1.07343	0.057	-0.00127	0.062	5e-05
YBR073W	RDH54		0.90123	0.048	0.96643	0.025	-0.06412	0.048	4e-05
YBR074W	YBR074W		0.97976	0.088	1.01821	0.068	-0.05395	0.088	0.0002
YBR075W	YBR075W		1.08535	0.05	1.13016	0.004	-0.04739	0.049	3e-05
YBR075W	YBR075W		1.01021	0.115	1.04955	0.02	-0.03287	0.115	0.0004
YBR076W	ECM8		0.80095	0.043	0.90112	0.031	-0.10132	0.043	4e-05
YBR077C	SLM4		1.34525	0.037	1.27577	0.04	0.07322	0.037	0.00026	status=JK
YBR078W	ECM33		1.32563	0.092	1.22013	0.137	0.10422	0.092	9e-05
YBR082C	UBC4		0.64996	0.149	0.98027	0.095	-0.34252	0.149	0.00318
YBR082C	UBC4		0.89479	0.047	0.83011	0.138	0.08496	0.047	4e-05
YBR083W	TEC1		1.08903	0.113	1.07101	0.07	0.01294	0.112	0.0003
YBR084C-A	RPL19A		0.70461	0.029	0.86577	0.102	-0.17409	0.029	0.00057	status=JK
YBR084W	MIS1		1.16739	0.032	0.96802	0.051	0.20245	0.031	1e-05
YBR085W	AAC3		1.02824	0.062	1.02806	0.089	0.02047	0.062	6e-05
YBR086C	IST2		0.94433	0.035	1.07232	0.153	-0.14458	0.035	1e-05
YBR090C	YBR090C		0.90372	0.004	0.9208	0.014	-0.01989	0.004	1e-05	status=JK
YBR090C-A	YBR090C-A		1.01518	0.003	0.95884	0.046	0.05259	0.003	0	status=JK
YBR092C	PHO3		0.96573	0.106	0.98042	0.066	-0.00346	0.106	0.00037
YBR093C	PHO5		0.45351	0.088	0.4234	0.077	0.03402	0.088	0.00197
YBR094W	PBY1		1.01258	0.052	1.02984	0.007	-0.02063	0.052	4e-05
YBR095C	RXT2		0.82288	0.052	0.78243	0.048	0.03748	0.052	7e-05
YBR095C	RXT2		0.92826	0.065	0.75315	0.189	0.14937	0.065	9e-05
YBR098W	MMS4		1.14179	0.125	1.1333	0.071	0.01837	0.125	0.00036
YBR099C	YBR099C		0.96323	0.083	0.85904	0.01	0.10199	0.083	0.00018
YBR100W	YBR100W		1.04332	0.091	1.00346	0.005	0.03925	0.09	0.00018
YBR101C	FES1		1.06347	0.06	0.99295	0.074	0.06507	0.059	5e-05
YBR103W	SIF2		0.77856	0.083	0.74519	0.031	0.02467	0.083	0.00033
YBR104W	YMC2		0.69028	0.06	0.78015	0.059	-0.09807	0.06	0.00018
YBR105C	VID24		1.12115	0.02	1.12392	0.042	-7e-05	0.02	0
YBR106W	PHO88		0.01303	0.013	0.23786	0.18	-0.21652	0.013	0.22593	status=JK
YBR107C	IML3		0.95337	0.032	0.9378	0.027	0.01241	0.032	1e-05
YBR108W	AIM3		1.05911	0.009	0.99249	0.028	0.06664	0.009	2e-05	status=JK
YBR111C	YSA1		1.11246	0.064	1.07797	0.039	0.02602	0.064	5e-05
YBR113W	YBR113W		1.00306	0.115	1.04911	0.064	-0.05014	0.115	0.00041
YBR114W	RAD16		0.91016	0.148	0.92671	0.029	-0.02478	0.148	0.00117
YBR115C	LYS2		0.25088	0.036	0.25571	0.042	-0.00042	0.036	0.00077
YBR115C	LYS2		0.2873	0.013	0.24758	0.031	0.02439	0.013	0.00067	status=JK
YBR116C	YBR116C		0.95842	0.016	0.93443	0.053	0.03699	0.016	0.0001	status=JK
YBR118W	TEF2		0.9601	0.025	0.96077	0.141	0.01108	0.025	0
YBR119W	MUD1		0.99238	0.149	1.06228	0.113	-0.07599	0.148	0.00091
YBR121C	GRS1		0.84352	0.013	0.84958	0.06	-0.01978	0.013	0
YBR122C	MRPL36		1.14918	0.061	1.13378	0.042	0.02557	0.061	4e-05
YBR125C	PTC4		0.967	0.143	0.97959	0.017	-0.00405	0.142	0.00087
YBR126C	TPS1		0.67542	0.016	0.77063	0.063	-0.1118	0.016	0.0002	status=JK
YBR128C	ATG14		0.85758	0.016	0.94048	0.038	-0.08821	0.016	0.00012	status=JK
YBR129C	OPY1		0.93118	0.055	0.91977	0.023	0.01405	0.055	6e-05
YBR130C	SHE3		1.09699	0.086	1.09908	0.008	-0.00329	0.086	0.00013
YBR131W	CCZ1		0.76095	0.044	0.62446	0.035	0.13517	0.044	5e-05
YBR132C	AGP2		1.20621	0.015	1.12718	0.032	0.07691	0.015	5e-05	status=JK
YBR134W	YBR134W		1.1869	0.062	1.141	0.034	0.04764	0.061	4e-05
YBR137W	YBR137W		0.94124	0.042	0.83637	0.034	0.10471	0.042	2e-05
YBR138C	YBR138C		1.09271	0.044	1.11036	0.054	-0.00838	0.044	2e-05
YBR139W	YBR139W		1.08141	0.184	1.10697	0.063	-0.01239	0.183	0.00132
YBR141C	YBR141C		1.00762	0.03	0.93095	0.027	0.07794	0.03	0.00029	status=JK
YBR144C	YBR144C		1.00367	0.107	0.99495	0.047	0.00407	0.106	0.00033
YBR145W	ADH5		0.98679	0.067	0.8414	0.02	0.15005	0.067	9e-05
YBR146W	MRPS9		0.89808	0.02	0.99568	0.157	-0.07623	0.02	0
YBR147W	RTC2		0.99243	0.08	1.0364	0.078	-0.0499	0.08	0.00015
YBR148W	YSW1		1.27713	0.042	1.25605	0.061	0.02216	0.042	1e-05
YBR149W	ARA1		0.87382	0.032	0.8595	0.045	0.01132	0.032	0.00046	status=JK
YBR150C	TBS1		0.90573	0.072	0.90269	0.028	0.00054	0.072	0.00014
YBR151W	APD1		1.02099	0.063	0.91595	0.042	0.0947	0.063	6e-05
YBR156C	SLI15		1.08574	0.037	1.01961	0.04	0.06485	0.037	1e-05
YBR157C	ICS2		1.00313	0.02	0.97228	0.063	0.0152	0.02	0.00013	status=JK
YBR158W	AMN1		1.10364	0.111	1.02805	0.093	0.06215	0.111	0.00028
YBR159W	IFA38		1.212	0.079	1.13435	0.013	0.07009	0.079	8e-05
YBR161W	CSH1		1.03134	0.067	1.04235	0.026	-0.00867	0.067	8e-05
YBR162C	TOS1		1.01887	0.011	1.02995	0.021	-0.00935	0.011	4e-05	status=JK
YBR162W-A	YSY6		0.92525	0.092	0.93971	0.024	-0.01735	0.091	0.00027
YBR164C	ARL1		0.93712	0.066	0.90358	0.047	0.03734	0.066	0.0001
YBR165W	UBS1		1.09531	0.014	1.03441	0.059	0.05345	0.014	6e-05	status=JK
YBR165W	UBS1		1.02132	0.047	1.033	0.186	0.03211	0.047	3e-05
YBR166C	TYR1		0.97079	0.025	0.99725	0.013	-0.02416	0.025	0
YBR168W	PEX32		1.05251	0.021	0.96461	0.007	0.09124	0.021	0.00013	status=JK
YBR169C	SSE2		1.0922	0.008	1.02337	0.046	0.06146	0.008	2e-05	status=JK
YBR170C	NPL4		0.67309	0.1	0.7594	0.031	-0.10027	0.1	0.00089
YBR171W	SEC66		0.87768	0.143	0.86853	0.063	0.02343	0.143	0.00117
YBR172C	SMY2		1.03649	0.03	1.06153	0.008	-0.02766	0.03	1e-05
YBR174C	YBR174C		0.99438	0.041	1.01638	0.007	-0.02097	0.041	2e-05
YBR175W	SWD3		0.99057	0.028	1.00402	0.021	-0.01813	0.028	1e-05
YBR176W	ECM31		0.93291	0.043	1.02675	0.021	-0.09896	0.043	0.0007	status=JK
YBR177C	EHT1		1.09571	0.008	0.94777	0.108	0.12945	0.008	2e-05	status=JK
YBR178W	YBR178W		1.1618	0.055	1.14245	0.014	0.01829	0.055	0.00074	status=JK
YBR180W	DTR1		0.89129	0.052	0.9053	0.018	-0.01731	0.052	5e-05
YBR181C	RPS6B		0.60259	0.029	0.69469	0.012	-0.09395	0.029	3e-05
YBR182C	SMP1		0.97071	0.047	0.98904	0.003	-0.01807	0.047	3e-05
YBR183W	YPC1		1.14765	0.096	1.11751	0.048	0.03003	0.096	0.00016
YBR184W	YBR184W		0.91897	0.018	0.99118	0.05	-0.06987	0.018	0.00012	status=JK
YBR185C	MBA1		0.92337	0.064	0.75288	0.043	0.16555	0.064	9e-05
YBR186W	PCH2		1.02233	0.084	0.99644	0.01	0.02702	0.084	0.00015
YBR187W	GDT1		0.9637	0.009	0.97572	0.066	-0.01081	0.009	3e-05	status=JK
YBR188C	NTC20		1.06038	0.021	1.09063	0.036	-0.03388	0.021	0.00013	status=JK
YBR189W	RPS9B		0.14287	0.103	0.23184	0.024	-0.10166	0.103	0.06907
YBR194W	AIM4		0.78837	0.142	0.77442	0.017	0.0117	0.141	0.00156
YBR195C	MSI1		1.13246	0.084	1.16011	0.077	-0.04725	0.083	0.00011
YBR197C	YBR197C		1.21159	0.115	1.23375	0.092	-0.04552	0.114	0.00023
YBR199W	KTR4		0.93608	0.09	0.94721	0.019	-0.0146	0.09	0.00024
YBR200W	BEM1		0.48005	0.157	0.76907	0.092	-0.29352	0.157	0.00879
YBR201W	DER1		1.04087	0.077	1.02189	0.046	0.02668	0.077	0.00011
YBR203W	COS111		1.20924	0.016	1.16384	0.053	0.04061	0.016	6e-05	status=JK
YBR204C	LDH1		0.81091	0.061	1.03108	0.01	-0.21764	0.061	0.00011
YBR205W	KTR3		0.98635	0.047	1.00656	0.027	-0.02871	0.047	3e-05
YBR206W	YBR206W		0.97661	0.064	0.94324	0.054	0.04362	0.064	8e-05
YBR207W	FTH1		1.24254	0.173	1.13511	0.047	0.10567	0.172	0.00073
YBR208C	DUR1		1.10051	0.186	1.10671	0.06	-0.01147	0.186	0.0013
YBR209W	YBR209W		1.05533	0.155	1.05737	0.081	0.01665	0.155	0.00085
YBR210W	ERV15		1.08603	0.133	1.1972	0.054	-0.11935	0.133	0.0005
YBR212W	NGR1		1.06091	0.052	1.0593	0.036	0.00699	0.052	3e-05
YBR213W	MET8		0.97459	0.07	1.04078	0.019	-0.06064	0.07	0.0001
YBR214W	SDS24		1.00786	0.06	0.99707	0.048	0.00265	0.06	6e-05
YBR215W	HPC2		1.28834	0.02	1.22484	0.011	0.05999	0.02	8e-05	status=JK
YBR216C	YBP1		1.06964	0.087	1.03184	0.038	0.02917	0.086	0.00015
YBR217W	ATG12		0.89679	0.087	0.83228	0.016	0.05778	0.087	0.00025
YBR218C	PYC2		1.217	0.112	1.1467	0.052	0.06506	0.112	0.00021
YBR219C	YBR219C		1.00727	0.037	1.04861	0.071	-0.03902	0.037	0.00044	status=JK
YBR220C	YBR220C		1.00738	0.294	1.01402	0.082	0.00553	0.294	0.00638
YBR221C	PDB1		0.91074	0.061	0.71023	0.026	0.19849	0.061	8e-05
YBR222C	PCS60		0.96707	0.092	1.0413	0.036	-0.07229	0.092	0.00024
YBR223C	TDP1		0.77936	0.123	0.79436	0.081	-0.02665	0.123	0.00106
YBR224W	YBR224W		0.97727	0.115	0.92106	0.026	0.0567	0.115	0.00045
YBR225W	YBR225W		1.02127	0.068	1.01458	0.005	0.0042	0.068	8e-05
YBR226C	YBR226C		0.95655	0.114	0.97394	0.05	-0.01118	0.114	0.00046
YBR227C	MCX1		0.97479	0.022	0.88535	0.017	0.09212	0.022	0.00016	status=JK
YBR228W	SLX1		1.09213	0.047	0.98934	0.014	0.09533	0.047	2e-05
YBR229C	ROT2		0.99131	0.044	0.97518	0.013	0.01463	0.043	2e-05
YBR230C	OM14		1.02175	0.078	1.03393	0.041	-0.02161	0.077	0.00012
YBR231C	SWC5		0.31298	0.062	0.38398	0.084	-0.08014	0.062	0.00207
YBR232C	YBR232C		1.03508	0.1	1.10855	0.022	-0.06996	0.1	0.00025
YBR233W	PBP2		0.9728	0.035	0.90795	0.031	0.06325	0.035	0.00043	status=JK
YBR235W	VHC1		0.94741	0.039	0.97526	0.044	-0.03517	0.039	2e-05
YBR238C	YBR238C		0.68649	0.107	0.53311	0.055	0.15777	0.106	0.00101
YBR239C	ERT1		1.06899	0.094	1.06804	0.005	-0.00069	0.094	0.00019
YBR240C	THI2		1.02804	0.029	1.03306	0.038	-0.00197	0.029	1e-05
YBR241C	YBR241C		0.96324	0.062	0.98475	0.031	-0.02806	0.062	7e-05
YBR242W	YBR242W		0.97249	0.056	0.95959	0.017	0.00666	0.056	5e-05
YBR244W	GPX2		1.00319	0.104	0.99549	0.04	0.01774	0.103	0.0003
YBR245C	ISW1		0.97512	0.077	0.93114	0.011	0.04473	0.077	0.00013
YBR246W	RRT2		1.03538	0.041	1.0691	0.023	-0.03691	0.041	2e-05
YBR248C	HIS7		0.53081	0.014	0.38066	0.008	0.1474	0.014	0.00025	status=JK
YBR249C	ARO4		1.02122	0.019	1.08877	0.027	-0.06668	0.019	0.00011	status=JK
YBR250W	SPO23		1.10839	0.032	1.00223	0.055	0.1082	0.031	0.00027	status=JK
YBR255W	MTC4		1.03696	0.117	0.96658	0.086	0.07417	0.117	0.0004
YBR258C	SHG1		1.00827	0.081	1.04774	0.051	-0.05209	0.081	0.00014
YBR259W	YBR259W		1.08098	0.044	1.01461	0.037	0.07102	0.044	2e-05
YBR260C	RGD1		1.13828	0.094	1.14532	0.03	-0.00972	0.094	0.00015
YBR261C	TAE1		0.93782	0.063	1.01661	0.009	-0.07528	0.062	0.00148	status=JK
YBR262C	AIM5		0.90493	0.129	0.88288	0.009	0.02196	0.129	0.00078
YBR263W	SHM1		0.92569	0.047	1.04556	0.026	-0.11346	0.047	0.00085	status=JK
YBR264C	YPT10		1.09624	0.002	1.03254	0.017	0.06097	0.002	0	status=JK
YBR266C	YBR266C		0.40767	0.051	0.49297	0.01	-0.08604	0.051	0.00053
YBR267W	REI1		0.31654	0.09	0.3738	0.053	-0.06305	0.09	0.00596
YBR269C	FMP21		1.04257	0.114	1.01167	0.04	0.02506	0.113	0.00035
YBR270C	BIT2		1.10198	0.067	1.06576	0.045	0.03482	0.067	6e-05
YBR271W	EFM2		0.99988	0.015	0.98455	0.019	0.00449	0.015	0
YBR272C	HSM3		0.91838	0.077	0.96437	0.068	-0.04411	0.077	0.00016
YBR273C	UBX7		0.96555	0.025	0.92066	0.06	0.06175	0.025	0.00022	status=JK
YBR274W	CHK1		1.03583	0.016	1.0807	0.01	-0.04233	0.016	8e-05	status=JK
YBR275C	RIF1		0.98345	0.041	0.88175	0.081	0.09147	0.041	2e-05
YBR276C	PPS1		1.18954	0.177	1.14162	0.073	0.05416	0.176	0.00089
YBR277C	YBR277C		1.09746	0.121	1.04174	0.013	0.06167	0.121	0.00037
YBR278W	DPB3		1.02452	0.061	0.94623	0.052	0.08662	0.061	6e-05
YBR280C	SAF1		1.04304	0.037	1.01868	0.063	0.02636	0.037	1e-05
YBR281C	DUG2		1.02121	0.087	1.04829	0.045	-0.01794	0.087	0.00017
YBR283C	SSH1		0.72903	0.047	0.77237	0.021	-0.04207	0.047	7e-05
YBR284W	YBR284W		0.91762	0.034	1.01428	0.043	-0.09808	0.034	1e-05
YBR285W	YBR285W		1.07045	0.122	1.10911	0.05	-0.03616	0.122	0.0004
YBR286W	APE3		1.01452	0.065	1.01626	0.065	0.00086	0.065	7e-05
YBR287W	YBR287W		0.81772	0.015	0.88487	0.013	-0.06979	0.015	0.00011	status=JK
YBR288C	APM3		0.78815	0.145	0.93309	0.045	-0.14791	0.145	0.00167
YBR289W	SNF5		0.27726	0.067	0.29387	0.048	-0.02389	0.067	0.00371
YBR290W	BSD2		0.88994	0.031	0.91082	0.039	-0.02546	0.031	1e-05
YBR291C	CTP1		1.01854	0.041	0.98185	0.044	0.03315	0.041	2e-05
YBR292C	YBR292C		1.03426	0.087	1.02962	0.102	0.002	0.087	0.00017
YBR293W	VBA2		0.91955	0.02	0.90399	0.06	-0.00351	0.02	0.00016	status=JK
YBR294W	SUL1		0.03466	0.06	0.39628	0.285	-0.41793	0.06	0.42265	status=JK
YBR295W	PCA1		1.02164	0.062	0.99239	0.057	0.03328	0.062	6e-05
YBR296C	PHO89		1.09013	0.093	1.08997	0.067	-0.01088	0.093	0.00017
YBR297W	MAL33		0.98002	0.09	1.01326	0.065	-0.03545	0.09	0.00021
YBR298C	MAL31		0.91854	0.017	0.94069	0.063	-0.03688	0.017	0.00012	status=JK
YBR299W	MAL32		1.16929	0.048	1.22565	0.2	-0.06428	0.048	2e-05
YBR300C	YBR300C		0.99609	0.097	1.03288	0.055	-0.04389	0.097	0.00026
YBR301W	PAU24		0.93848	0.053	0.97356	0.052	-0.03394	0.053	5e-05
YCL001W	RER1		1.1219	0.035	1.04672	0.023	0.0717	0.035	0.00033	status=JK
YCL001W-A	YCL001W-A		1.25393	0.066	1.17068	0.011	0.08295	0.066	4e-05
YCL002C	YCL002C		0.9831	0.116	1.0553	0.028	-0.07877	0.116	0.00045
YCL006C	YCL006C		0.95718	0.094	0.90969	0.029	0.05021	0.094	0.00026
YCL009C	ILV6		1.15836	0.037	1.15072	0.004	0.00842	0.037	1e-05
YCL010C	SGF29		0.85886	0.088	0.91228	0.062	-0.05883	0.088	0.0003
YCL011C	GBP2		1.14702	0.088	1.02658	0.013	0.12243	0.088	0.00012
YCL012W	YCL012W		1.04827	0.121	1.07139	0.086	-0.03058	0.12	0.00041
YCL013W	YCL013W		0.76069	0.167	0.8546	0.009	-0.08955	0.167	0.00281
YCL014W	BUD3		0.98854	0.116	1.06731	0.047	-0.08749	0.115	0.00044
YCL016C	DCC1		0.7263	0.042	0.73355	0.012	-0.01331	0.042	0.00113	status=JK
YCL022C	YCL022C		0.8304	0.05	0.81854	0.085	-0.00948	0.05	6e-05
YCL023C	YCL023C		0.836	0.11	0.84531	0.108	-0.01045	0.11	0.00062
YCL024W	KCC4		0.96245	0.062	0.92075	0.064	0.05001	0.061	7e-05
YCL025C	AGP1		0.79804	0.01	0.76953	0.006	0.02913	0.01	6e-05	status=JK
YCL026C	YCL026C		1.25876	0.017	1.18087	0.105	0.05428	0.017	6e-05	status=JK
YCL026C-A	FRM2		0.79955	0.227	1.08064	0.015	-0.27371	0.227	0.00591
YCL027W	FUS1		1.09126	0.104	1.09536	0.023	-0.00168	0.104	0.00024
YCL028W	RNQ1		1.03415	0.127	1.0985	0.038	-0.06658	0.126	0.0005
YCL029C	BIK1		0.97604	0.071	0.99414	0.041	-0.01625	0.071	0.0001
YCL030C	HIS4		0.41628	0.099	0.42018	0.061	0.00498	0.098	0.00349
YCL032W	STE50		0.93726	0.059	0.91088	0.011	0.02574	0.059	7e-05
YCL033C	MXR2		0.87198	0.053	0.85492	0.085	0.0296	0.053	6e-05
YCL034W	LSB5		1.01817	0.144	0.95606	0.054	0.07319	0.144	0.00077
YCL035C	GRX1		1.08997	0.023	1.05591	0.015	0.03805	0.023	0
YCL036W	GFD2		1.14534	0.018	1.20911	0.058	-0.0608	0.018	8e-05	status=JK
YCL037C	SRO9		0.49151	0.241	0.77973	0.136	-0.29815	0.24	0.02649
YCL038C	ATG22		0.93989	0.082	0.94149	0.033	0.00277	0.082	0.00018
YCL039W	GID7		1.11686	0.098	1.09612	0.027	0.02087	0.098	0.00019
YCL040W	GLK1		1.14678	0.067	1.05736	0.067	0.10229	0.067	5e-05
YCL042W	YCL042W		1.17737	0.002	1.08942	0.026	0.08867	0.002	0	status=JK
YCL044C	MGR1		0.83633	0.047	0.72015	0.022	0.12562	0.047	5e-05
YCL045C	EMC1		1.14688	0.064	1.19344	0.007	-0.04657	0.064	5e-05
YCL046W	YCL046W		1.05524	0.058	0.98473	0.064	0.06068	0.057	4e-05
YCL047C	POF1		1.01355	0.023	0.99245	0.009	0.02001	0.023	0
YCL048W	SPS22		0.94549	0.021	0.98313	0.045	-0.04602	0.021	0.00017	status=JK
YCL049C	YCL049C		0.95933	0.132	0.91028	0.029	0.05141	0.132	0.00071
YCL050C	APA1		1.06228	0.122	1.07581	0.024	-0.01221	0.122	0.00041
YCL051W	LRE1		1.15056	0.034	1.11001	0.027	0.04895	0.034	0.0003	status=JK
YCL055W	KAR4		0.87636	0.063	0.80308	0.036	0.07279	0.063	0.0001
YCL056C	PEX34		1.13225	0.019	1.12493	0.016	0.00682	0.019	0.0001	status=JK
YCL057W	PRD1		1.00108	0.136	1.01014	0.018	-0.0017	0.136	0.00068
YCL060C	YCL060C		1.06044	0.06	1.07543	0.012	-0.01456	0.06	5e-05
YCL061C	MRC1		0.94893	0.075	0.91422	0.075	0.0186	0.075	0.00014
YCL062W	YCL062W		0.76597	0.1	0.844	0.068	-0.08192	0.1	0.00061
YCL063W	VAC17		0.89676	0.086	0.94576	0.057	-0.0444	0.086	0.00024
YCL064C	CHA1		0.98637	0.078	0.96836	0.038	0.01598	0.078	0.00013
YCL069W	VBA3		0.82436	0.042	0.98924	0.028	-0.16014	0.042	4e-05
YCL074W	YCL074W		0.73434	0.083	0.77879	0.022	-0.04489	0.082	0.00039
YCL075W	YCL075W		0.8368	0.155	0.91844	0.037	-0.07962	0.155	0.00171
YCL076W	YCL076W		0.82712	0.026	0.86296	0.061	-0.02799	0.026	0.00034	status=JK
YCR001W	YCR001W		1.17251	0.061	1.1974	0.048	-0.03455	0.061	4e-05
YCR005C	CIT2		0.94542	0.099	0.98027	0.016	-0.03373	0.099	0.00031
YCR006C	YCR006C		1.15294	0.063	1.00249	0.014	0.1492	0.062	0.00098	status=JK
YCR007C	YCR007C		0.99755	0.098	1.09822	0.009	-0.10157	0.098	0.00026
YCR008W	SAT4		1.05269	0.106	1.02776	0.011	0.02543	0.106	0.00028
YCR009C	RVS161		0.79377	0.04	0.60277	0.024	0.19158	0.04	4e-05
YCR010C	ADY2		1.08675	0.037	1.10666	0.027	-0.01716	0.037	1e-05
YCR011C	ADP1		1.14483	0.07	1.19647	0.018	-0.04352	0.07	6e-05
YCR014C	POL4		1.10678	0.038	1.07124	0.011	0.03962	0.038	1e-05
YCR015C	YCR015C		1.0365	0.028	1.00752	0.019	0.02071	0.028	1e-05
YCR016W	YCR016W		0.95095	0.103	0.95792	0.013	-0.00168	0.103	0.00035
YCR017C	CWH43		1.22414	0.043	1.13726	0.013	0.0858	0.043	1e-05
YCR019W	MAK32		1.10211	0.045	1.08598	0.064	0.00516	0.045	2e-05
YCR020C	PET18		0.96145	0.01	0.9492	0.022	0.01359	0.01	4e-05	status=JK
YCR020C-A	MAK31		1.12915	0.118	1.06269	0.029	0.06527	0.117	0.00031
YCR021C	HSP30		1.23496	0.038	1.16217	0.052	0.08365	0.038	1e-05
YCR022C	YCR022C		1.22752	0.034	1.14291	0.007	0.08446	0.034	1e-05
YCR023C	YCR023C		1.05986	0.012	1.08367	0.042	-0.02211	0.012	4e-05	status=JK
YCR024C-A	PMP1		0.92802	0.004	0.9913	0.026	-0.04981	0.004	1e-05	status=JK
YCR025C	YCR025C		1.09587	0.09	1.12244	0.059	-0.0183	0.09	0.00015
YCR026C	NPP1		1.13219	0.116	1.15151	0.07	-0.02174	0.115	0.00029
YCR027C	RHB1		1.13932	0.092	1.12988	0.051	0.01163	0.092	0.00014
YCR028C-A	RIM1		0.83238	0.049	0.75357	0.013	0.0788	0.049	6e-05
YCR030C	SYP1		1.07318	0.041	1.0482	0.089	0.02058	0.041	1e-05
YCR031C	RPS14A		0.9239	0.048	0.91133	0.073	-0.0062	0.048	4e-05
YCR032W	BPH1		1.03363	0.044	0.97025	0.053	0.07652	0.044	2e-05
YCR033W	SNT1		0.52248	0.057	0.51669	0.019	-6e-05	0.057	0.00036
YCR034W	FEN1		0.75549	0.012	0.80415	0.04	-0.05809	0.012	9e-05	status=JK
YCR036W	RBK1		1.0324	0.024	1.01613	0.055	-0.00119	0.024	0
YCR037C	PHO87		1.05723	0.096	0.94835	0.012	0.10453	0.096	0.00021
YCR043C	YCR043C		1.22397	0.085	1.20331	0.058	0.03482	0.085	9e-05
YCR044C	PER1		1.16911	0.066	1.172	0.071	-0.00221	0.066	5e-05
YCR045C	RRT12		1.05232	0.016	1.00279	0.017	0.05353	0.016	0
YCR048W	ARE1		0.9517	0.053	1.03343	0.012	-0.08322	0.053	5e-05
YCR049C	YCR049C		1.05504	0.059	1.10261	0.06	-0.0604	0.058	5e-05
YCR050C	YCR050C		1.09775	0.055	0.99535	0.081	0.0993	0.055	3e-05
YCR051W	YCR051W		1.07135	0.103	1.22341	0.042	-0.16182	0.103	0.00024
YCR053W	THR4		0.37973	0.07	0.34123	0.087	0.02361	0.07	0.00166
YCR059C	YIH1		1.00445	0.097	0.92872	0.104	0.05253	0.097	0.00025
YCR060W	TAH1		1.05175	0.035	1.03995	0.027	-0.00269	0.035	1e-05
YCR061W	YCR061W		1.22985	0.081	1.14989	0.022	0.0882	0.081	8e-05
YCR062W	YCR062W		1.20243	0.107	1.10146	0.009	0.09601	0.107	0.0002
YCR063W	BUD31		0.08224	0.052	0.57676	0.008	-0.49106	0.051	0.04975
YCR065W	HCM1		0.93987	0.103	0.91782	0.048	0.02834	0.103	0.00036
YCR067C	SED4		1.06501	0.068	0.99434	0.006	0.06782	0.068	7e-05
YCR068W	ATG15		1.15926	0.011	1.0721	0.011	0.08589	0.011	3e-05	status=JK
YCR069W	CPR4		1.27421	0.022	1.16421	0.01	0.11028	0.022	0
YCR071C	IMG2		0.65236	0.013	0.48909	0.089	0.16511	0.013	0.00013	status=JK
YCR073C	SSK22		0.99958	0.084	0.98748	0.044	0.01845	0.084	0.00016
YCR073W-A	SOL2		0.94595	0.073	0.98501	0.029	-0.03663	0.073	0.00013
YCR075C	ERS1		1.17171	0.052	1.19776	0.052	-0.01391	0.052	2e-05
YCR076C	FUB1		1.29547	0.034	1.26621	0.016	0.02763	0.034	0.00024	status=JK
YCR077C	PAT1		0.75118	0.005	0.7645	0.053	-0.02064	0.005	1e-05	status=JK
YCR079W	PTC6		1.03246	0.068	0.9754	0.031	0.05203	0.068	8e-05
YCR081W	SRB8		0.54253	0.034	0.49456	0.01	0.04491	0.034	7e-05
YCR082W	AHC2		1.08801	0.104	1.03973	0.034	0.04999	0.104	0.00024
YCR083W	TRX3		1.1331	0.012	1.10631	0.034	0.02187	0.012	3e-05	status=JK
YCR085W	YCR085W		1.15676	0.056	1.12724	0.051	0.01651	0.056	3e-05
YCR086W	CSM1		1.11615	0.031	1.02657	0.005	0.08787	0.031	0.00026	status=JK
YCR087C-A	YCR087C-A		1.09854	0.06	1.11349	0.028	-0.01287	0.06	5e-05
YCR087W	YCR087W		1.10919	0.029	1.08908	0.043	0.02443	0.029	1e-05
YCR088W	ABP1		1.03652	0.042	0.97119	0.034	0.06254	0.042	2e-05
YCR089W	FIG2		1.05278	0.055	1.06936	0.072	-0.03367	0.055	4e-05
YCR090C	YCR090C		0.99835	0.044	0.99328	0.046	0.00525	0.044	2e-05
YCR091W	KIN82		0.9125	0.026	0.91859	0.055	-0.00976	0.026	0.00026	status=JK
YCR092C	MSH3		1.03873	0.031	0.96719	0.051	0.07881	0.031	0.0003	status=JK
YCR095C	OCA4		1.06509	0.04	1.04521	0.059	0.00211	0.04	1e-05
YCR098C	GIT1		1.04073	0.032	1.14108	0.032	-0.0945	0.032	0.00032	status=JK
YCR099C	YCR099C		1.09499	0.04	1.11893	0.035	-0.02517	0.04	1e-05
YCR100C	YCR100C		1.20632	0.089	1.1751	0.009	0.03592	0.089	0.00011
YCR101C	YCR101C		1.10962	0.031	1.07177	0.009	0.03703	0.031	1e-05
YCR102C	YCR102C		1.0346	0.068	1.05542	0.009	-0.01622	0.068	8e-05
YCR102W-A	YCR102W-A		0.93776	0.061	0.97609	0.05	-0.03133	0.061	8e-05
YCR105W	ADH7		0.95925	0.017	1.03088	0.019	-0.07691	0.017	0
YCR106W	RDS1		1.04451	0.076	1.05866	0.037	-0.01085	0.076	0.00011
YCR107W	AAD3		1.06496	0.052	1.05448	0.049	0.02646	0.052	3e-05
YDL001W	RMD1		1.02917	0.122	1.03269	0.016	-0.01065	0.122	0.00045
YDL002C	NHP10		0.82756	0.051	0.76266	0.064	0.05288	0.05	6e-05
YDL006W	PTC1		0.76171	0.048	0.8273	0.028	-0.06227	0.048	7e-05
YDL010W	GRX6		1.04214	0.043	1.06214	0.013	-0.01776	0.043	2e-05
YDL011C	YDL011C		1.19924	0.008	1.15871	0.038	0.03188	0.008	1e-05	status=JK
YDL012C	YDL012C		0.95102	0.175	1.01919	0.014	-0.07098	0.175	0.00166
YDL013W	SLX5		0.36555	0.05	0.37435	0.006	-0.00753	0.05	0.00069
YDL018C	ERP3		0.97335	0.035	0.97909	0.071	-0.00661	0.035	1e-05
YDL019C	OSH2		1.12044	0.092	1.09995	0.04	0.01028	0.092	0.00015
YDL020C	RPN4		0.66658	0.051	0.68343	0.043	-0.02106	0.051	0.00013
YDL023C	YDL023C		1.0826	0.177	1.0802	0.035	0.00466	0.177	0.00117
YDL024C	DIA3		1.00226	0.033	0.96209	0.036	0.03827	0.033	1e-05
YDL025C	RTK1		1.22937	0.187	1.20836	0.048	0.02123	0.186	0.00094
YDL026W	YDL026W		1.00517	0.018	0.99448	0.078	0.01102	0.018	0.00011	status=JK
YDL027C	YDL027C		0.87331	0.089	0.9217	0.08	-0.06753	0.089	0.00029
YDL033C	SLM3		0.67246	0.12	0.4187	0.065	0.25442	0.12	0.00153
YDL034W	YDL034W		1.04384	0.198	1.1214	0.117	-0.05428	0.197	0.00181
YDL035C	GPR1		0.97422	0.061	0.92542	0.008	0.04458	0.061	7e-05
YDL036C	PUS9		1.14726	0.113	1.10194	0.068	0.0502	0.113	0.00026
YDL037C	BSC1		1.16945	0.067	1.09221	0.048	0.08748	0.067	5e-05
YDL038C	YDL038C		1.17983	0.025	1.0998	0.043	0.08209	0.025	0.00015	status=JK
YDL039C	PRM7		1.01235	0.114	1.05385	0.114	-0.04937	0.114	0.00039
YDL040C	NAT1		0.97621	0.021	0.96851	0.11	0.00395	0.021	0
YDL041W	YDL041W		0	0	0	0	0	0	#NUM!	status=JK
YDL042C	SIR2		0	0	0	0	0	0	#NUM!	status=JK
YDL046W	NPC2		1.02121	0.005	1.0538	0.031	-0.03966	0.005	1e-05	status=JK
YDL048C	STP4		1.07007	0.09	1.08198	0.052	-0.00696	0.09	0.00016
YDL050C	YDL050C		1.17119	0.066	1.14834	0.064	0.01662	0.066	5e-05
YDL051W	LHP1		1.29948	0.005	1.11557	0.07	0.17826	0.005	1e-05	status=JK
YDL052C	SLC1		0.99831	0.077	1.00634	0.045	-0.01579	0.077	0.00012
YDL053C	PBP4		0.82871	0.076	0.89432	0.093	-0.05921	0.075	0.00021
YDL054C	MCH1		0.78284	0.066	0.86919	0.062	-0.07456	0.066	0.00016
YDL056W	MBP1		1.3017	0.022	1.18434	0.018	0.11559	0.022	0
YDL059C	RAD59		1.10159	0.088	1.09359	0.047	0.01939	0.088	0.00014
YDL061C	RPS29B		0.45534	0.104	0.51104	0.069	-0.05973	0.104	0.00316
YDL062W	YDL062W		0.86186	0.003	0.94961	0.058	-0.08729	0.003	0	status=JK
YDL065C	PEX19		0.95669	0.121	0.81579	0.099	0.13858	0.121	0.00055
YDL066W	IDP1		0.89324	0.115	0.97891	0.125	-0.10377	0.115	0.00059
YDL070W	BDF2		0.78209	0.125	0.84292	0.06	-0.06033	0.125	0.0011
YDL071C	YDL071C		1.08457	0.093	1.11989	0.099	-0.02713	0.093	0.00017
YDL074C	BRE1		0.33962	0.021	0.52197	0.014	-0.18616	0.021	0.00132	status=JK
YDL074C	BRE1		0.58723	0.144	0.49215	0.08	0.10149	0.144	0.00388
YDL076C	RXT3		0.91728	0.085	0.83678	0.11	0.07084	0.084	0.00021
YDL077C	VAM6		0.59432	0.115	0.604	0.036	-0.01936	0.115	0.00194
YDL078C	MDH3		0.4149	0.401	0.8901	0.019	-0.46423	0.4	0.13011
YDL079C	MRK1		0.86375	0.061	1.00216	0.021	-0.14027	0.061	0.0001
YDL080C	THI3		0.73839	0.132	0.85425	0.063	-0.11087	0.131	0.00151
YDL081C	RPP1A		0.50629	0.077	0.75145	0.031	-0.23928	0.077	0.00095
YDL082W	RPL13A		0.72272	0.098	0.79256	0.041	-0.07953	0.098	0.00068
YDL083C	RPS16B		0.64246	0.028	0.74379	0.081	-0.09576	0.028	2e-05
YDL085W	NDE2		1.07191	0.077	1.06279	0.025	0.00984	0.077	0.0001
YDL086W	YDL086W		1.21462	0.076	1.2104	0.032	0.00408	0.076	7e-05
YDL088C	ASM4		0.87956	0.012	1.02161	0.034	-0.14834	0.012	6e-05	status=JK
YDL089W	NUR1		1.10172	0.091	1.05792	0.092	0.03306	0.091	0.00015
YDL090C	RAM1		0	0	0	0	0	0	#NUM!
YDL091C	UBX3		1.04516	0.102	1.04123	0.038	0.01081	0.101	0.00025
YDL093W	PMT5		1.16713	0.108	1.06687	0.093	0.0778	0.108	0.00022
YDL094C	YDL094C		0.98861	0.08	0.98568	0.015	-5e-05	0.08	0.00015
YDL095W	PMT1		0.96794	0.077	0.99001	0.024	-0.02003	0.077	0.00014
YDL096C	YDL096C		0.82531	0.059	0.89545	0.059	-0.07218	0.059	0.0001
YDL099W	BUG1		1.14435	0.079	1.09089	0.035	0.04639	0.079	9e-05
YDL100C	GET3		0.8313	0.062	0.79294	0.06	0.03295	0.062	0.00011
YDL104C	QRI7		0.87668	0.034	0.82972	0.043	0.05367	0.034	2e-05
YDL106C	PHO2		1.03085	0.049	1.08678	0.035	-0.05544	0.049	3e-05
YDL109C	YDL109C		0.91091	0.056	0.94797	0.002	-0.03753	0.056	6e-05
YDL110C	TMA17		0.8949	0.063	0.86059	0.052	0.01605	0.063	0.0001
YDL112W	TRM3		0.88267	0.071	0.95967	0.011	-0.08201	0.071	0.00015
YDL113C	ATG20		0.90571	0.017	0.96822	0.077	-0.07337	0.017	0
YDL114W	YDL114W		1.14304	0.097	1.10797	0.032	0.03825	0.097	0.00017
YDL117W	CYK3		0.65105	0.033	0.76824	0.022	-0.11026	0.033	4e-05
YDL118W	YDL118W		0.94639	0.019	0.89389	0.052	0.04609	0.018	0
YDL119C	YDL119C		0.89084	0.014	0.95089	0.044	-0.06645	0.014	8e-05	status=JK
YDL121C	YDL121C		0.91933	0.07	0.89455	0.065	0.01475	0.07	0.00012
YDL122W	UBP1		0.92692	0.055	0.96058	0.045	-0.04416	0.055	6e-05
YDL123W	SNA4		1.09449	0.098	1.02445	0.05	0.07763	0.098	0.0002
YDL124W	YDL124W		1.08529	0.085	1.10015	0.066	-0.00867	0.085	0.00013
YDL125C	HNT1		1.02932	0.009	0.98497	0.067	0.03857	0.009	2e-05	status=JK
YDL127W	PCL2		0.84086	0.048	0.88172	0.071	-0.04654	0.048	5e-05
YDL128W	VCX1		0.94213	0.031	0.90628	0.051	0.02794	0.031	1e-05
YDL129W	YDL129W		1.08806	0.066	1.03806	0.036	0.05827	0.066	6e-05
YDL130W	RPP1B		0.9572	0.075	0.94859	0.081	0.01725	0.075	0.00013
YDL130W-A	STF1		1.20189	0.068	1.14455	0.048	0.05975	0.068	5e-05
YDL131W	LYS21		0.98172	0.232	1.11933	0.048	-0.15793	0.231	0.00346
YDL133C-A	RPL41B		1.04008	0.082	0.95306	0.008	0.08857	0.082	0.00013
YDL133W	SRF1		0.96057	0.034	1.00605	0.01	-0.04124	0.034	1e-05
YDL134C	PPH21		1.12041	0.081	1.08484	0.026	0.04095	0.081	0.00011
YDL134C-A	YDL134C-A		0.95991	0.075	0.96397	0.025	0.0017	0.075	0.00013
YDL135C	RDI1		0.99013	0.105	1.03467	0.004	-0.04585	0.105	0.00033
YDL136W	RPL35B		0.95558	0.03	0.97429	0.031	-0.01335	0.03	0.00032	status=JK
YDL137W	ARF2		0.99277	0.004	0.90575	0.041	0.09285	0.004	0	status=JK
YDL138W	RGT2		1.06803	0.136	1.07377	0.125	0.00189	0.135	0.00056
YDL142C	CRD1		0.85265	0.01	0.83775	0.058	0.02239	0.01	0
YDL144C	YDL144C		1.15103	0.011	1.0645	0.057	0.07442	0.011	0
YDL146W	LDB17		1.04228	0.044	1.02315	0.115	-0.00415	0.044	2e-05
YDL149W	ATG9		0.77867	0.187	0.95969	0.028	-0.18621	0.186	0.0036
YDL154W	MSH5		1.02436	0.074	0.97848	0.044	0.04909	0.074	0.0001
YDL155W	CLB3		1.21529	0.027	1.09439	0.045	0.11913	0.027	0.00017	status=JK
YDL156W	CMR1		0.79615	0.115	0.88287	0.005	-0.08572	0.115	0.00082
YDL157C	YDL157C		0.79191	0.003	0.78302	0.044	0.00678	0.003	0	status=JK
YDL159W	STE7		0	0	0	0	0	0	#NUM!
YDL160C	DHH1		0	0	0.004	0.005	-0.00342	0	#NUM!
YDL161W	ENT1		1.00638	0.071	1.02582	0.005	-0.02069	0.07	9e-05
YDL162C	YDL162C		1.00734	0.138	1.01796	0.09	-0.00348	0.138	0.0007
YDL167C	NRP1		0.95679	0.054	0.96996	0.028	-0.00932	0.054	5e-05
YDL168W	SFA1		1.17386	0.075	1.11397	0.024	0.05611	0.075	7e-05
YDL169C	UGX2		1.03785	0.057	0.89433	0.09	0.15267	0.057	5e-05
YDL170W	UGA3		1.07633	0.09	1.10248	0.009	-0.02502	0.09	0.00016
YDL171C	GLT1		0.92394	0.035	0.94905	0.051	-0.0199	0.035	2e-05
YDL172C	YDL172C		0.87116	0.023	0.95485	0.016	-0.07746	0.023	0.00023	status=JK
YDL173W	PAR32		0.90393	0.081	0.89827	0.033	0.00034	0.08	0.00019
YDL174C	DLD1		1.16338	0.073	1.1159	0.004	0.04532	0.073	7e-05
YDL175C	AIR2		1.11775	0.004	1.00995	0.068	0.0985	0.004	0	status=JK
YDL176W	YDL176W		0.98215	0.034	0.97402	0.026	0.00183	0.034	1e-05
YDL177C	YDL177C		1.03773	0.11	1.02153	0.003	0.01604	0.11	0.00032
YDL178W	DLD2		1.29985	0.028	1.19925	0.005	0.09745	0.028	0.00016	status=JK
YDL179W	PCL9		1.03605	0.015	1.00744	0.059	0.02147	0.015	7e-05	status=JK
YDL180W	YDL180W		0.99184	0.174	0.95308	0.104	0.05217	0.173	0.00144
YDL181W	INH1		1.09819	0.04	1.11382	0.071	-0.00098	0.04	1e-05
YDL182W	LYS20		1.08051	0.069	1.01764	0.106	0.06837	0.069	7e-05
YDL183C	YDL183C		0.93275	0.014	0.87641	0.02	0.04971	0.014	0
YDL184C	RPL41A		0.96796	0.095	0.95973	0.087	0.01813	0.095	0.00026
YDL185W	VMA1		0.95384	0.073	0.9777	0.039	-0.02578	0.073	0.00012
YDL186W	YDL186W		1.04466	0.024	0.99766	0.022	0.04319	0.024	0.00018	status=JK
YDL187C	YDL187C		1.09027	0.133	1.05262	0.023	0.03381	0.133	0.00049
YDL188C	PPH22		1.06584	0.064	1.02038	0.009	0.05133	0.064	6e-05
YDL189W	RBS1		1.12783	0.209	1.04596	0.027	0.08933	0.208	0.0017
YDL190C	UFD2		0.94595	0.291	0.88302	0.041	0.0627	0.291	0.00742
YDL191W	RPL35A		0.73437	0.102	0.82566	0.064	-0.10121	0.101	0.00072
YDL192W	ARF1		0.66761	0.073	0.66094	0.025	0.01382	0.073	0.00035
YDL194W	SNF3		0.96631	0.091	0.93064	0.012	0.03604	0.09	0.00022
YDL197C	ASF2		0.97134	0.083	0.97106	0.026	0.0054	0.083	0.00017
YDL199C	YDL199C		0.98347	0.159	1.02504	0.019	-0.03703	0.159	0.00113
YDL200C	MGT1		0.9799	0.138	1.01589	0.017	-0.03196	0.138	0.00076
YDL201W	TRM8		1.12057	0.103	1.04799	0.101	0.06088	0.102	0.00021
YDL203C	ACK1		1.10483	0.098	1.11402	0.041	-0.01125	0.097	0.00019
YDL204W	RTN2		0.98213	0.11	0.94233	0.002	0.04096	0.11	0.00039
YDL206W	YDL206W		1.03417	0.078	0.99872	0.011	0.03721	0.078	0.00012
YDL210W	UGA4		1.15413	0.058	1.18581	0.014	-0.03486	0.058	3e-05
YDL211C	YDL211C		1.05365	0.087	1.07024	0.037	-0.01245	0.087	0.00015
YDL213C	NOP6		1.08585	0.077	1.04418	0.054	0.03167	0.076	0.0001
YDL214C	PRR2		1.01503	0.084	1.13819	0.049	-0.12203	0.084	0.00016
YDL215C	GDH2		0.90433	0.198	0.91008	0.049	-0.01402	0.197	0.00276
YDL216C	RRI1		0.9198	0.077	0.94088	0.014	-0.02167	0.077	0.00016
YDL218W	YDL218W		0.92466	0.05	0.97306	0.057	-0.03249	0.05	4e-05
YDL219W	DTD1		0.96924	0.061	0.95861	0.079	0.01793	0.061	7e-05
YDL222C	FMP45		1.00154	0.063	0.97811	0.011	0.02745	0.063	7e-05
YDL223C	HBT1		1.10522	0.13	1.04649	0.071	0.06123	0.129	0.00044
YDL224C	WHI4		0.92048	0.04	1.03841	0.066	-0.1031	0.04	0.00062	status=JK
YDL226C	GCS1		1.05008	0.025	1.01035	0.007	0.04352	0.025	0.00019	status=JK
YDL227C	HO		0.78732	0.247	0.89143	0.029	-0.10526	0.246	0.0078
YDL229W	SSB1		0.80852	0.13	0.85591	0.009	-0.04529	0.13	0.00113
YDL230W	PTP1		0.93997	0.058	0.94598	0.05	-0.00304	0.058	6e-05
YDL231C	BRE4		0.91044	0.088	0.97404	0.08	-0.05283	0.088	0.00025
YDL232W	OST4		0.56314	0.126	0.72413	0.004	-0.15836	0.126	0.00294
YDL233W	MFG1		1.134	0.101	1.08416	0.005	0.0524	0.101	0.00019
YDL234C	GYP7		1.07389	0.132	0.95908	0.017	0.11092	0.132	0.00051
YDL236W	PHO13		0.98322	0.096	0.94907	0.017	0.03246	0.095	0.00025
YDL237W	AIM6		1.05992	0.128	1.05208	0.054	0.00646	0.128	0.00048
YDL238C	GUD1		1.08545	0.117	1.11873	0.043	-0.03546	0.116	0.00034
YDL239C	ADY3		0.99467	0.201	0.91104	0.057	0.08826	0.2	0.00219
YDL240W	LRG1		1.05174	0.01	0.95378	0.031	0.1027	0.01	3e-05	status=JK
YDL241W	YDL241W		0.98701	0.086	1.01935	0.024	-0.04083	0.086	0.00018
YDL242W	YDL242W		1.20721	0.037	1.08683	0.018	0.11903	0.037	1e-05
YDL243C	AAD4		1.0421	0.109	1.10058	0.061	-0.0558	0.109	0.00032
YDR001C	NTH1		0.986	0.083	0.9581	0.003	0.02809	0.083	0.00016
YDR003W	RCR2		1.01388	0.111	1.04502	0.012	-0.02786	0.111	0.00036
YDR004W	RAD57		0.72425	0.119	0.82782	0.023	-0.11568	0.119	0.0012
YDR005C	MAF1		1.0214	0.183	1.01476	0.022	0.00427	0.183	0.00155
YDR006C	SOK1		0.81078	0.176	0.92954	0.074	-0.11666	0.176	0.00273
YDR007W	TRP1		1.0194	0.054	1.00051	0.067	0.02599	0.054	4e-05
YDR008C	YDR008C		1.04296	0.154	1.09754	0.007	-0.05145	0.154	0.00087
YDR009W	GAL3		0.98918	0.145	1.04266	0.046	-0.06097	0.145	0.00085
YDR010C	YDR010C		1.02915	0.056	1.22818	0.124	-0.17141	0.056	0.00099	status=JK
YDR011W	SNQ2		0.9318	0.026	0.99096	0.052	-0.06795	0.025	0.00025	status=JK
YDR014W	RAD61		0.82019	0.089	0.89159	0.074	-0.06503	0.089	0.00035
YDR015C	YDR015C		1.0102	0.098	0.95767	0.068	0.04205	0.098	0.00025
YDR018C	YDR018C		1.03421	0.113	1.0612	0.051	-0.03424	0.112	0.00035
YDR019C	GCV1		1.06168	0.139	1.07744	0.017	-0.01759	0.139	0.00061
YDR020C	DAS2		1.12117	0.069	1.09142	0.031	0.03045	0.069	6e-05
YDR022C	ATG31		1.24121	0.039	1.10557	0.024	0.13645	0.039	0.00033	status=JK
YDR024W	YDR024W		0.74744	0.077	0.78783	0.012	-0.0329	0.077	0.0003
YDR025W	RPS11A		0.89155	0.123	0.90307	0.184	2e-05	0.123	0.00072
YDR026C	NSI1		1.06063	0.031	1.12415	0.083	-0.06026	0.03	1e-05
YDR029W	YDR029W		1.0936	0.127	1.32475	0.042	-0.21766	0.127	0.00043
YDR030C	RAD28		0.99804	0.065	0.97017	0.171	0.02264	0.065	8e-05
YDR031W	MIC14		1.02548	0.025	1.02839	0.091	-0.00389	0.025	0.00019	status=JK
YDR032C	PST2		0.88787	0.043	0.89569	0.008	-0.0057	0.043	3e-05
YDR033W	MRH1		1.10669	0.065	0.97237	0.045	0.12936	0.064	5e-05
YDR034C	LYS14		0.29076	0.017	0.32504	0.104	-0.06622	0.017	5e-05
YDR035W	ARO3		1.08955	0.093	0.92881	0.073	0.17568	0.093	0.00017
YDR036C	EHD3		1.01932	0.043	1.05525	0.139	0.00201	0.043	0.00058	status=JK
YDR042C	YDR042C		1.20783	0.096	1.31338	0.014	-0.10162	0.096	0.00014
YDR043C	NRG1		1.06633	0.064	1.01758	0.184	0.09947	0.064	6e-05
YDR046C	BAP3		1.02851	0.137	1.05241	0.176	-0.04799	0.137	0.00065
YDR048C	YDR048C		0.94667	0.158	1.06478	0.027	-0.11826	0.158	0.00126
YDR049W	VMS1		0.94393	0.058	0.95792	0.065	-0.00863	0.057	6e-05
YDR051C	DET1		0.88586	0.007	0.89857	0.021	-0.01121	0.007	2e-05	status=JK
YDR055W	PST1		1.03802	0.196	1.07015	0.049	-0.02412	0.195	0.00179
YDR056C	YDR056C		1.08983	0.01	1.06292	0.019	0.03431	0.01	3e-05	status=JK
YDR057W	YOS9		1.32997	0.026	1.15269	0.018	0.18057	0.026	0
YDR058C	TGL2		0.85169	0.131	0.81199	0.073	0.01737	0.131	0.00098
YDR059C	UBC5		1.23717	0.066	1.22642	0.043	0.0197	0.066	4e-05
YDR061W	YDR061W		1.02658	0.054	1.08736	0.028	-0.06105	0.054	0.00092	status=JK
YDR063W	AIM7		1.02893	0.098	0.98323	0.023	0.03941	0.098	0.00024
YDR066C	RTR2		1.14896	0.103	1.16868	0.03	-0.02061	0.103	0.0002
YDR067C	OCA6		0.95616	0.074	0.99708	0.047	-0.04331	0.074	0.00013
YDR068W	DOS2		0.92025	0.034	0.9886	0.104	-0.06124	0.034	0.00046	status=JK
YDR070C	FMP16		0.9474	0.155	0.96138	0.036	-0.02035	0.155	0.00119
YDR071C	PAA1		0.79182	0.102	0.67923	0.027	0.11662	0.102	0.00058
YDR072C	IPT1		1.08459	0.112	1.02016	0.052	0.07044	0.111	0.0003
YDR073W	SNF11		1.14853	0.045	1.21363	0.036	-0.05806	0.045	0.00052	status=JK
YDR074W	TPS2		0.99844	0.104	0.94822	0.041	0.05509	0.104	0.00031
YDR075W	PPH3		1.09696	0.144	1.05657	0.017	0.04061	0.143	0.00061
YDR076W	RAD55		0.56842	0.07	0.65889	0.06	-0.09882	0.07	0.00051
YDR077W	SED1		0.99229	0.037	1.01056	0.026	-0.01916	0.037	0.00047	status=JK
YDR080W	VPS41		0.48727	0.114	0.74106	0.051	-0.25948	0.114	0.00334
YDR083W	RRP8		0.64856	0.067	0.76929	0.011	-0.11735	0.066	0.00029
YDR084C	TVP23		1.10577	0.019	1.06023	0.008	0.04273	0.019	0.0001	status=JK
YDR085C	AFR1		1.16008	0.113	1.1572	0.077	2e-05	0.113	0.00025
YDR089W	YDR089W		1.1585	0.099	1.06106	0.043	0.1039	0.099	0.00017
YDR090C	YDR090C		1.17536	0.063	1.16462	0.022	0.01626	0.063	4e-05
YDR092W	UBC13		0.91729	0.087	0.78087	0.007	0.1384	0.087	0.00023
YDR093W	DNF2		0.97765	0.146	1.01382	0.007	-0.03227	0.146	0.0009
YDR094W	YDR094W		0.88778	0.096	0.83723	0.009	0.05391	0.096	0.00035
YDR095C	YDR095C		1.09517	0.056	1.03842	0.058	0.04808	0.056	4e-05
YDR096W	GIS1		1.12886	0.133	1.10523	0.03	0.02138	0.133	0.00044
YDR097C	MSH6		0.85753	0.253	0.85644	0.06	-0.01109	0.253	0.00659
YDR098C	GRX3		0.97006	0.078	1.10103	0.008	-0.12879	0.078	0.00014
YDR099W	BMH2		0.70467	0.145	0.84493	0.011	-0.1348	0.144	0.00229
YDR100W	TVP15		1.00179	0.154	1.04641	0.031	-0.04791	0.154	0.00098
YDR101C	ARX1		0.60257	0.087	0.79997	0.005	-0.19626	0.087	0.00082
YDR102C	YDR102C		1.05736	0.042	1.02694	0.003	0.03233	0.042	0.00054	status=JK
YDR103W	STE5		0	0	0.00852	0.008	-0.00747	0	#NUM!	status=JK
YDR104C	SPO71		1.06475	0.1	1.0476	0.056	0.01756	0.1	0.00023
YDR105C	TMS1		1.12935	0.045	1.05669	0.04	0.07808	0.045	2e-05
YDR107C	TMN2		1.00609	0.216	1.03428	0.024	-0.03066	0.216	0.00262
YDR108W	TRS85		0.90459	0.024	0.98674	0.043	-0.0801	0.024	0.00023	status=JK
YDR109C	YDR109C		1.21053	0.09	1.25673	0.054	-0.02185	0.09	0.00011
YDR110W	FOB1		1.20353	0.071	1.15365	0.101	0.05619	0.071	6e-05
YDR111C	ALT2		0.96213	0.174	1.02181	0.076	-0.07179	0.174	0.00158
YDR112W	YDR112W		1.07275	0.065	1.05886	0.052	0.01485	0.064	6e-05
YDR116C	MRPL1		0.86635	0.07	0.60627	0.012	0.26236	0.07	0.00015
YDR117C	TMA64		1.03053	0.087	1.03721	0.045	-0.01452	0.087	0.00016
YDR119W	VBA4		1.0306	0.148	1.01923	0.036	0.01143	0.147	0.0008
YDR120C	TRM1		0.95627	0.181	1.11865	0.037	-0.16417	0.181	0.00182
YDR121W	DPB4		1.1261	0.133	1.08168	0.005	0.04285	0.133	0.00045
YDR122W	KIN1		1.06482	0.136	1.12317	0.002	-0.05676	0.136	0.00057
YDR123C	INO2		0.73761	0.065	0.7085	0.013	0.03058	0.065	0.00018
YDR124W	YDR124W		1.19717	0.054	1.12388	0.026	0.06193	0.054	0.00067	status=JK
YDR125C	ECM18		0.98247	0.107	1.00271	0.075	-0.03256	0.106	0.00035
YDR126W	SWF1		0.76156	0.115	0.77962	0.043	-0.01041	0.115	0.00094
YDR127W	ARO1		0.71804	0.053	0.84824	0.034	-0.13451	0.053	0.00184	status=JK
YDR128W	MTC5		0.6257	0.12	0.62952	0.027	-0.00219	0.12	0.0019
YDR130C	FIN1		1.05981	0.06	1.0071	0.028	0.05302	0.06	5e-05
YDR131C	YDR131C		1.10684	0.012	1.02703	0.011	0.07784	0.012	4e-05	status=JK
YDR132C	YDR132C		1.03306	0.098	0.90387	0.017	0.13069	0.097	0.00023
YDR133C	YDR133C		1.09888	0.18	1.13175	0.058	-0.01717	0.18	0.00119
YDR134C	YDR134C		1.02587	0.028	1.02406	0.073	-0.01467	0.028	0.00025	status=JK
YDR135C	YCF1		1.13399	0.123	1.04154	0.087	0.09977	0.123	0.00035
YDR139C	RUB1		0.89186	0.093	0.93672	0.084	-0.0474	0.093	0.00031
YDR142C	PEX7		1.02812	0.08	0.95702	0.024	0.07126	0.08	0.00013
YDR143C	SAN1		1.28394	0.019	1.2687	0.074	0.01792	0.019	7e-05	status=JK
YDR144C	MKC7		0.84989	0.108	0.90131	0.043	-0.04176	0.108	0.00056
YDR146C	SWI5		1.15863	0.059	1.08048	0.034	0.07927	0.059	4e-05
YDR147W	EKI1		0.91829	0.172	0.94966	0.032	-0.03945	0.172	0.00176
YDR148C	KGD2		0.76686	0.025	0.90364	0.133	-0.13106	0.025	0.00036	status=JK
YDR149C	YDR149C		0.99263	0.113	0.90314	0.067	0.09968	0.113	0.0004
YDR150W	NUM1		0.90624	0.072	0.82664	0.126	0.07369	0.072	0.00014
YDR151C	CTH1		1.12185	0.026	1.03235	0.012	0.09404	0.026	0
YDR152W	GIR2		1.22849	0.122	1.1655	0.054	0.05758	0.122	0.00027
YDR153C	ENT5		1.04665	0.079	1.02247	0.017	0.02002	0.079	0.00012
YDR154C	YDR154C		0.97035	0.113	0.96722	0.073	0.00865	0.113	0.00043
YDR155C	CPR1		1.15821	0.112	1.08201	0.052	0.07914	0.112	0.00025
YDR156W	RPA14		0.97093	0.022	0.94824	0.086	0.02139	0.022	0
YDR157W	YDR157W		1.10103	0.096	1.06526	0.086	0.05892	0.096	0.00018
YDR158W	HOM2		0.76808	0.105	0.83719	0.009	-0.07345	0.105	0.0007
YDR159W	SAC3		0.55409	0.24	0.52497	0.03	0.03213	0.239	0.01905
YDR161W	YDR161W		0.9692	0.113	0.80959	0.038	0.16234	0.113	0.00043
YDR162C	NBP2		0.81703	0.079	0.90041	0.037	-0.08968	0.079	0.00025
YDR163W	CWC15		1.1435	0.053	1.16779	0.005	-0.02596	0.053	3e-05
YDR165W	TRM82		0.86815	0.047	0.89028	0.034	-0.01133	0.046	0.00096	status=JK
YDR169C	STB3		1.09073	0.185	1.05529	0.123	0.04178	0.185	0.00132
YDR171W	HSP42		1.02172	0.141	1.07896	0.095	-0.06101	0.141	0.00071
YDR173C	ARG82		0.33014	0.125	0.3765	0.005	-0.04403	0.124	0.01313
YDR174W	HMO1		0.52881	0.061	0.61395	0.113	-0.08155	0.061	0.00043
YDR178W	SDH4		1.06292	0.149	0.98128	0.078	0.09525	0.149	0.00075
YDR179C	CSN9		1.20497	0.025	1.0212	0.066	0.1821	0.025	0.00014	status=JK
YDR179W-A	YDR179W-A		1.12198	0.065	1.04362	0.077	0.08105	0.065	0.0011	status=JK
YDR181C	SAS4		1.02979	0.152	1.07297	0.035	-0.03495	0.152	0.00087
YDR183W	PLP1		0.9382	0.036	0.93855	0.042	0.00203	0.036	0.0005	status=JK
YDR184C	ATC1		0.76929	0.021	0.85749	0.039	-0.09342	0.021	0.00024	status=JK
YDR185C	UPS3		1.05599	0.069	1.00392	0.014	0.05496	0.069	8e-05
YDR186C	YDR186C		1.12499	0.106	1.02567	0.029	0.09657	0.106	0.00023
YDR191W	HST4		0.76202	0.111	0.71151	0.02	0.05675	0.111	0.007	status=JK
YDR192C	NUP42		0.97184	0.045	1.09142	0.067	-0.1143	0.045	0.00071	status=JK
YDR193W	YDR193W		1.04095	0.131	1.01336	0.006	0.0298	0.131	0.00055
YDR198C	RKM2		1.1817	0.083	1.07448	0.018	0.10728	0.083	0.0001
YDR199W	YDR199W		1.1684	0.192	1.14961	0.031	0.02468	0.192	0.0012
YDR202C	RAV2		0.93882	0.089	0.88978	0.052	0.05137	0.089	0.00023
YDR203W	YDR203W		0.934	0.189	0.99886	0.021	-0.06147	0.189	0.00221
YDR205W	MSC2		0.88105	0.124	0.93306	0.08	-0.05508	0.124	0.00075
YDR206W	EBS1		1.03078	0.201	1.04494	0.006	-0.0104	0.201	0.00199
YDR207C	UME6		0.35474	0.11	0.62075	0.026	-0.26518	0.11	0.00751
YDR209C	YDR209C		0.94866	0.106	0.98426	0.032	-0.02559	0.106	0.00038
YDR210W	YDR210W		1.20635	0.121	1.13318	0.01	0.07452	0.121	0.00028
YDR213W	UPC2		1.0868	0.067	0.99118	0.039	0.10142	0.067	7e-05
YDR214W	AHA1		1.04631	0.135	1.10262	0.006	-0.05468	0.135	0.00058
YDR215C	YDR215C		1.21746	0.025	1.18651	0.038	0.0341	0.025	0.00015	status=JK
YDR216W	ADR1		1.03585	0.105	1.02843	0.018	0.01224	0.105	0.00028
YDR217C	RAD9		1.03383	0.108	1.02716	0.021	-0.00374	0.107	0.00031
YDR218C	SPR28		0.89116	0.041	0.97869	0.049	-0.09273	0.041	0.00072	status=JK
YDR219C	MFB1		0.94348	0.147	0.88764	0.053	0.06785	0.147	0.00103
YDR220C	YDR220C		0.98413	0.052	1.09651	0.032	-0.11189	0.052	4e-05
YDR221W	GTB1		1.16441	0.088	1.11636	0.025	0.05558	0.088	0.00012
YDR222W	YDR222W		1.03504	0.089	1.00507	0.055	0.0365	0.089	0.00018
YDR223W	CRF1		1.12009	0.047	1.05025	0.059	0.0901	0.047	2e-05
YDR225W	HTA1		0.88835	0.151	0.85212	0.016	0.04176	0.151	0.00133
YDR227W	SIR4		0	0	0	0	0	0	#NUM!
YDR229W	IVY1		1.15021	0.096	1.06661	0.038	0.07549	0.095	0.00016
YDR233C	RTN1		0.98906	0.076	1.03359	0.04	-0.03662	0.076	0.00012
YDR234W	LYS4		0.39746	0.06	0.33621	0.003	0.06294	0.06	0.00093
YDR239C	YDR239C		0.90658	0.084	0.97386	0.058	-0.06198	0.084	0.00022
YDR241W	YDR241W		0.68642	0.114	0.81404	0.049	-0.12145	0.113	0.00122
YDR242W	AMD2		1.04084	0.149	0.95335	0.284	0.0239	0.148	0.00079
YDR244W	PEX5		0.96075	0.043	0.80834	0.098	0.13828	0.042	2e-05
YDR245W	MNN10		0.90737	0.149	0.97221	0.064	-0.07629	0.149	0.00119
YDR247W	VHS1		1.03604	0.127	1.00872	0.071	0.02372	0.127	0.0005
YDR248C	YDR248C		1.20655	0.129	1.09776	0.013	0.10411	0.129	0.00033
YDR249C	YDR249C		1.08487	0.162	1.07093	0.03	0.00852	0.161	0.00089
YDR250C	YDR250C		1.01142	0.169	1.06835	0.007	-0.05851	0.168	0.00125
YDR251W	PAM1		0.99408	0.189	1.04112	0.04	-0.04628	0.189	0.00185
YDR252W	BTT1		1.15529	0.108	1.08432	0.019	0.07561	0.108	0.00022
YDR253C	MET32		0.99954	0.055	0.8699	0.053	0.11993	0.055	0.00101	status=JK
YDR254W	CHL4		1.18289	0.018	1.04582	0.085	0.12994	0.018	8e-05	status=JK
YDR255C	RMD5		1.0593	0.015	1.04902	0.043	0.01394	0.015	0
YDR256C	CTA1		1.09626	0.12	1.09725	0.05	-0.0102	0.12	0.00036
YDR257C	RKM4		0.95208	0.114	0.92836	0.007	0.02723	0.114	0.00047
YDR258C	HSP78		0.98626	0.125	1.05057	0.057	-0.06733	0.125	0.00055
YDR259C	YAP6		1.13503	0.162	1.09973	0.123	0.00699	0.161	0.00078
YDR260C	SWM1		0.95118	0.151	1.02732	0.098	-0.05848	0.151	0.00109
YDR261C	EXG2		1.05378	0.168	1.00277	0.024	0.03929	0.168	0.0011
YDR262W	YDR262W		1.0741	0.039	1.05436	0.045	0.02642	0.038	1e-05
YDR263C	DIN7		0.90845	0.066	0.91192	0.028	-0.00691	0.066	0.0001
YDR265W	PEX10		0.99461	0.112	0.93032	0.07	0.05859	0.112	0.00039
YDR266C	HEL2		1.11545	0.111	1.05016	0.057	0.06318	0.111	0.00027
YDR269C	YDR269C		1.04983	0.019	1.06978	0.178	0.00143	0.019	0.00011	status=JK
YDR270W	CCC2		1.10041	0.114	1.09033	0.015	0.01537	0.113	0.0003
YDR271C	YDR271C		1.04213	0.144	1.04254	0.18	-0.06082	0.144	0.00072
YDR272W	GLO2		0.9979	0.13	1.00018	0.011	0.00011	0.13	0.00061
YDR273W	DON1		1.11671	0.048	1.04807	0.06	0.07227	0.048	0.00062	status=JK
YDR274C	YDR274C		1.04769	0.147	1.07773	0.061	-0.02812	0.147	0.00074
YDR275W	BSC2		1.03906	0.088	1.06295	0.009	-0.02536	0.088	0.00017
YDR276C	PMP3		1.01948	0.036	0.80646	0.017	0.20882	0.035	0.0004	status=JK
YDR277C	MTH1		0.95357	0.118	1.01065	0.07	-0.04256	0.118	0.00052
YDR278C	YDR278C		0.72787	0.114	0.71964	0.04	0.01081	0.114	0.00103
YDR279W	RNH202		0.86103	0.013	0.88376	0.078	-0.04441	0.013	8e-05	status=JK
YDR281C	PHM6		1.06562	0.083	1.01164	0.024	0.04964	0.083	0.00013
YDR282C	YDR282C		1.16703	0.125	1.13203	0.021	0.03596	0.125	0.00033
YDR284C	DPP1		0.89981	0.042	0.97578	0.024	-0.06948	0.042	3e-05
YDR285W	ZIP1		1.12676	0.167	1.07291	0.041	0.05421	0.167	0.00089
YDR286C	YDR286C		0.92926	0.092	0.96856	0.063	-0.0422	0.092	0.00027
YDR287W	INM2		1.02269	0.18	1.02264	0.038	0.01248	0.179	0.00145
YDR289C	RTT103		0.65756	0.171	0.68406	0.066	-0.03547	0.171	0.0046
YDR290W	YDR290W		0.62724	0.137	0.682	0.23	-0.02748	0.136	0.00273
YDR291W	HRQ1		1.09651	0.195	1.0442	0.012	0.04784	0.195	0.00152
YDR293C	SSD1		1.36373	0.129	1.18512	0.036	0.1766	0.128	0.00023
YDR294C	DPL1		0.99615	0.033	1.03927	0.089	-0.05371	0.033	0.00037	status=JK
YDR297W	SUR2		0.75034	0.061	0.84517	0.055	-0.10241	0.061	0.00015
YDR304C	CPR5		0.94792	0.256	0.99493	0.079	-0.06204	0.255	0.00509
YDR305C	HNT2		1.00299	0.187	0.98272	0.072	0.01389	0.187	0.00174
YDR306C	YDR306C		0.94333	0.013	0.91136	0.031	0.03166	0.013	6e-05	status=JK
YDR307W	PMT7		0.9525	0.109	0.95029	0.069	0.0212	0.109	0.00041
YDR309C	GIC2		0.95082	0.175	0.9732	0.036	-0.01749	0.175	0.00167
YDR310C	SUM1		0.95543	0.127	1.06025	0.095	-0.11825	0.127	0.00064
YDR312W	SSF2		1.04303	0.206	1.10341	0.026	-0.05623	0.205	0.00204
YDR313C	PIB1		0.92504	0.017	1.00038	0.023	-0.06996	0.017	0.00012	status=JK
YDR314C	RAD34		1.02725	0.144	1.12961	0.091	-0.1196	0.144	0.00075
YDR315C	IPK1		1.01235	0.106	0.96763	0.01	0.04662	0.106	0.00031
YDR316W	OMS1		1.01072	0.126	0.86572	0.027	0.14799	0.126	0.00052
YDR317W	HIM1		1.06555	0.078	1.08172	0.041	-0.0179	0.078	0.00011
YDR318W	MCM21		0.81679	0.075	0.91307	0.024	-0.09034	0.075	0.00022
YDR319C	YFT2		1.0233	0.101	0.9751	0.046	0.03504	0.101	0.00027
YDR320C	SWA2		0.90973	0.089	0.89575	0.034	0.02061	0.089	0.00026
YDR321W	ASP1		1.08057	0.098	1.11913	0.101	-0.04317	0.097	0.0002
YDR326C	YSP2		1.1589	0.069	1.11704	0.186	0.0795	0.069	6e-05
YDR329C	PEX3		0.9872	0.184	0.88849	0.034	0.09522	0.184	0.00174
YDR330W	UBX5		1.18124	0.031	1.15851	0.02	0.02273	0.031	0.00022	status=JK
YDR332W	IRC3		1.03649	0.116	0.97349	0.02	0.06535	0.116	0.00038
YDR333C	YDR333C		1.09216	0.116	1.05171	0.023	0.03816	0.116	0.00033
YDR334W	SWR1		0.80215	0.006	0.7599	0.07	0.02355	0.006	2e-05	status=JK
YDR335W	MSN5		0.89301	0.032	0.85317	0.06	0.03744	0.032	0.00042	status=JK
YDR336W	YDR336W		0.82596	0.017	0.74119	0.044	0.08942	0.016	0.00013	status=JK
YDR338C	YDR338C		1.11197	0.02	1.03107	0.01	0.08532	0.02	0.00011	status=JK
YDR340W	YDR340W		1.07858	0.039	1.07934	0.074	-7e-05	0.039	1e-05
YDR344C	YDR344C		0.91966	0.159	0.97772	0.007	-0.05903	0.159	0.00138
YDR345C	HXT3		1.00634	0.161	0.96136	0.041	0.03341	0.161	0.00111
YDR346C	SVF1		0.89861	0.113	0.99061	0.02	-0.09315	0.113	0.00054
YDR348C	PAL1		0.79152	0.08	0.87117	0.022	-0.0791	0.08	0.00029
YDR349C	YPS7		1.08422	0.054	1.06399	0.032	0.02185	0.054	3e-05
YDR351W	SBE2		0.86266	0.22	0.93965	0.04	-0.07456	0.22	0.00432
YDR352W	YPQ2		1.17854	0.09	1.17176	0.095	0.02881	0.089	0.00012
YDR354W	TRP4		0.96172	0.026	0.93038	0.043	0.03149	0.026	0.00024	status=JK
YDR357C	CNL1		1.0508	0.004	0.9477	0.037	0.10724	0.004	0	status=JK
YDR358W	GGA1		1.09334	0.192	1.08469	0.01	0.00912	0.192	0.00145
YDR359C	EAF1		0.16002	0.136	0.2695	0.049	-0.11082	0.135	0.09952
YDR360W	YDR360W		1.03678	0.118	0.92615	0.008	0.11469	0.118	0.0004
YDR363W	ESC2		0.82168	0.152	0.90483	0.043	-0.0874	0.152	0.00169
YDR363W-A	SEM1		0.83384	0.177	1.02168	0.036	-0.19329	0.176	0.00252
YDR368W	YPR1		1.01985	0.073	0.89729	0.065	0.11417	0.073	0.0001
YDR369C	XRS2		0.96269	0.063	1.12737	0.021	-0.17023	0.063	0.00144	status=JK
YDR370C	YDR370C		1.01246	0.053	1.03287	0.021	-0.01602	0.053	4e-05
YDR371W	CTS2		1.09356	0.03	1.03155	0.05	0.06622	0.03	1e-05
YDR372C	VPS74		1.02911	0.079	0.98901	0.031	0.04828	0.078	0.00012
YDR374C	YDR374C		0.97396	0.178	1.04183	0.057	-0.07092	0.178	0.00164
YDR375C	BCS1		0.80663	0.06	0.59467	0.103	0.22454	0.06	0.00011
YDR378C	LSM6		0.46537	0.125	0.5398	0.055	-0.07059	0.125	0.00507
YDR379W	RGA2		0.98637	0.091	1.03577	0.007	-0.04924	0.09	0.00021
YDR380W	ARO10		0.99077	0.053	0.92268	0.036	0.07642	0.053	4e-05
YDR382W	RPP2B		1.08244	0.056	1.03866	0.135	0.02897	0.056	4e-05
YDR383C	NKP1		0.76312	0.046	0.75697	0.039	0.00721	0.046	6e-05
YDR384C	ATO3		1.08437	0.131	0.96398	0.094	0.11384	0.131	0.00048
YDR385W	EFT2		0.91841	0.152	1.00061	0.097	-0.0916	0.151	0.00121
YDR386W	MUS81		1.00924	0.017	0.93564	0.049	0.07626	0.017	0
YDR387C	YDR387C		1.08169	0.034	1.11202	0.024	-0.03056	0.034	0.00032	status=JK
YDR388W	RVS167		0.77078	0.134	0.49907	0.007	0.27157	0.133	0.0014
YDR389W	SAC7		0.88756	0.049	0.92786	0.038	-0.02607	0.049	5e-05
YDR391C	YDR391C		1.12201	0.01	1.07866	0.038	0.03483	0.01	3e-05	status=JK
YDR392W	SPT3		0.70303	0.008	0.71984	0.007	-0.01717	0.008	4e-05	status=JK
YDR393W	SHE9		0.69005	0.107	0.7843	0.01	-0.09593	0.107	0.001
YDR395W	SXM1		1.28198	0.06	1.10726	0.03	0.17887	0.06	3e-05
YDR399W	HPT1		1.02374	0.109	0.9381	0.043	0.09733	0.108	0.00033
YDR400W	URH1		1.06117	0.012	0.95827	0.075	0.11132	0.012	4e-05	status=JK
YDR401W	YDR401W		0.97585	0.062	1.09255	0.117	-0.08436	0.062	7e-05
YDR402C	DIT2		1.10365	0.095	1.09438	0.009	0.01149	0.095	0.00017
YDR403W	DIT1		1.09577	0.109	1.06739	0.026	0.0364	0.109	0.00027
YDR406W	PDR15		1.12492	0.047	1.07308	0.01	0.05783	0.047	2e-05
YDR408C	ADE8		1.06521	0.013	1.05688	0.033	0.01119	0.013	5e-05	status=JK
YDR409W	SIZ1		0.94436	0.14	0.96047	0.005	-0.01214	0.14	0.00089
YDR410C	STE14		0	0	0	0	0	0	#NUM!
YDR411C	DFM1		0.98318	0.183	1.07572	0.012	-0.09271	0.183	0.00173
YDR414C	ERD1		1.01253	0.048	0.90019	0.006	0.11396	0.048	3e-05
YDR415C	YDR415C		1.08045	0.076	1.11673	0.025	-0.04752	0.076	9e-05
YDR419W	RAD30		0.93035	0.177	0.99213	0.047	-0.05999	0.177	0.00184
YDR420W	HKR1		0.98746	0.168	0.82795	0.047	0.17537	0.168	0.00133
YDR421W	ARO80		0.79684	0.077	0.92324	0.103	-0.12134	0.077	0.00025
YDR422C	SIP1		0.94816	0.102	0.95092	0.051	-0.00097	0.102	0.00034
YDR423C	CAD1		0.92298	0.087	0.97491	0.04	-0.05094	0.087	0.00023
YDR424C	DYN2		0.98086	0.078	0.96489	0.042	0.01513	0.078	0.00014
YDR425W	SNX41		0.82387	0.126	0.86892	0.007	-0.0418	0.126	0.00097
YDR426C	YDR426C		0.88087	0.113	0.89629	0.031	-0.02049	0.113	0.00058
YDR428C	BNA7		0.97165	0.109	0.99491	0.044	-0.02706	0.109	0.00039
YDR430C	CYM1		1.19391	0.052	1.14953	0.014	0.04474	0.052	2e-05
YDR431W	YDR431W		0.89609	0.107	0.82419	0.004	0.07056	0.107	0.00047
YDR435C	PPM1		1.11484	0.045	1.19054	0.032	-0.0799	0.045	2e-05
YDR436W	PPZ2		1.16118	0.137	1.16441	0.093	-0.00592	0.137	0.00045
YDR438W	THI74		1.00354	0.212	0.96315	0.031	0.04538	0.211	0.00248
YDR439W	LRS4		1.08685	0.16	1.18549	0.046	-0.10427	0.16	0.00086
YDR440W	DOT1		0.97518	0.008	1.02026	0.013	-0.03804	0.008	2e-05	status=JK
YDR441C	APT2		0.88704	0.137	0.95948	0.08	-0.08546	0.137	0.00099
YDR444W	YDR444W		1.11703	0.1	0.9438	0.035	0.16978	0.1	0.0002
YDR445C	YDR445C		1.08948	0.011	1.0152	0.027	0.07964	0.011	4e-05	status=JK
YDR446W	ECM11		0.97575	0.03	1.00934	0.004	-0.0337	0.03	0.00032	status=JK
YDR447C	RPS17B		1.05584	0.09	1.07251	0.015	-0.01117	0.09	0.00017
YDR451C	YHP1		1.0795	0.027	0.97974	0.011	0.09897	0.027	0
YDR452W	PPN1		1.15505	0.017	1.16812	0.01	-0.01305	0.017	0
YDR453C	TSA2		1.08866	0.043	0.95764	0.07	0.11145	0.043	2e-05
YDR455C	YDR455C		0.89489	0.088	0.90773	0.001	-0.01107	0.088	0.00026
YDR458C	HEH2		1.06973	0.025	1.0699	0.047	-0.00655	0.025	0.00018	status=JK
YDR459C	PFA5		0.9199	0.004	0.90973	0.037	0.01961	0.004	1e-05	status=JK
YDR461W	MFA1		0.35182	0.426	0.92567	0.074	-0.53474	0.426	0.19746
YDR463W	STP1		1.0839	0.165	1.01203	0.038	0.06731	0.164	0.00095
YDR465C	RMT2		1.12591	0.128	1.14825	0.012	-0.02609	0.128	0.0004
YDR466W	PKH3		1.10223	0.115	0.98207	0.017	0.11901	0.115	0.00031
YDR467C	YDR467C		1.09483	0.029	1.11481	0.06	-0.01157	0.029	1e-05
YDR469W	SDC1		1.00833	0.03	0.90711	0.016	0.09751	0.03	0.0003	status=JK
YDR471W	RPL27B		0.74956	0.223	0.85864	0.008	-0.10352	0.223	0.00676
YDR474C	YDR474C		0.94745	0.043	1.04068	0.026	-0.09455	0.043	0.00067	status=JK
YDR475C	JIP4		0.98511	0.174	0.94458	0.014	0.04686	0.174	0.00149
YDR476C	YDR476C		0.92675	0.21	0.99683	0.022	-0.06665	0.209	0.00305
YDR477W	SNF1		0.83451	0.135	0.88091	0.17	-0.02492	0.135	0.00115
YDR479C	PEX29		0.96258	0.052	0.98732	0.025	-0.01927	0.052	4e-05
YDR480W	DIG2		1.15882	0.08	1.16525	0.059	-0.01047	0.08	9e-05
YDR481C	PHO8		1.12276	0.136	1.03618	0.052	0.08325	0.135	0.00048
YDR482C	CWC21		1.08229	0.21	1.0902	0.01	-0.00691	0.21	0.00195
YDR483W	KRE2		1.06055	0.025	1.00591	0.065	0.05875	0.025	0
YDR483W	KRE2		0.97274	0.017	0.9454	0.052	0.04109	0.017	0.0001	status=JK
YDR485C	VPS72		0.81573	0.023	0.77954	0.048	0.03336	0.023	1e-05
YDR486C	VPS60		0.97163	0.055	0.92723	0.003	0.04555	0.055	0.00107	status=JK
YDR488C	PAC11		0.84129	0.03	0.94667	0.018	-0.09986	0.03	0.00043	status=JK
YDR490C	PKH1		1.17886	0.194	1.18886	0.039	-0.00263	0.193	0.00119
YDR491C	YDR491C		0.97725	0.104	1.02264	0.046	-0.04833	0.104	0.00033
YDR492W	IZH1		1.17754	0.216	1.09899	0.051	0.0713	0.216	0.00166
YDR493W	MZM1		0.99085	0.147	1.08086	0.061	-0.09835	0.147	0.00088
YDR494W	RSM28		1.17098	0.054	1.13583	0.024	0.03093	0.054	3e-05
YDR496C	PUF6		0.71702	0.234	0.78838	0.055	-0.08515	0.233	0.00869
YDR497C	ITR1		1.08209	0.079	1.07071	0.045	0.01262	0.079	0.00011
YDR500C	RPL37B		0	0	0	0	0	0	#NUM!
YDR501W	PLM2		1.27485	0.091	1.2072	0.056	0.05746	0.091	0.0001
YDR502C	SAM2		0.9688	0.206	1.03936	0.169	-0.02553	0.205	0.00253
YDR503C	LPP1		1.19582	0.006	1.07952	0.007	0.11564	0.006	1e-05	status=JK
YDR504C	SPG3		1.04751	0.054	1.12898	0.016	-0.08075	0.054	4e-05
YDR505C	PSP1		0.96883	0.031	0.91482	0.051	0.04455	0.031	0.00034	status=JK
YDR506C	GMC1		0.92684	0.134	0.91021	0.037	0.01692	0.133	0.00081
YDR508C	GNP1		0.98084	0.033	1.06542	0.111	-0.09474	0.033	1e-05
YDR509W	YDR509W		0.98397	0.084	0.98179	0.035	-0.00439	0.084	0.00017
YDR511W	ACN9		1.03004	0.086	1.0276	0.053	-0.00486	0.086	0.00016
YDR512C	EMI1		0.74607	0.093	0.64448	0.011	0.10046	0.093	0.00052
YDR513W	GRX2		1.0116	0.038	1.00948	0.026	0.00719	0.038	1e-05
YDR514C	YDR514C		0.01857	0.013	0.74994	0.136	-0.75705	0.013	0.13766	status=JK
YDR515W	SLF1		1.06466	0.02	1.02111	0.053	0.04595	0.02	0.00012	status=JK
YDR516C	EMI2		1.15551	0.12	1.12404	0.084	0.0442	0.12	0.00031
YDR517W	GRH1		1.09635	0.02	1.06372	0.055	0.02293	0.02	0.00012	status=JK
YDR519W	FPR2		1.09042	0.096	1.05534	0.091	0.06426	0.096	0.00019
YDR520C	URC2		1.18942	0.111	1.05153	0.134	0.12066	0.11	0.00022
YDR522C	SPS2		0.96429	0.088	0.935	0.074	0.03397	0.088	0.00021
YDR524C	AGE1		0.91333	0.102	0.95031	0.011	-0.03987	0.101	0.00038
YDR525W	YDR525W		1.16454	0.079	1.07365	0.02	0.09375	0.079	9e-05
YDR525W-A	SNA2		0.91014	0.048	0.96687	0.027	-0.05391	0.048	4e-05
YDR528W	HLR1		0.80013	0.103	1.00192	0.064	-0.21114	0.103	0.00058
YDR530C	APA2		1.0964	0.025	1.02673	0.016	0.07312	0.025	0
YDR532C	KRE28		0.1031	0.084	0.14509	0.02	-0.03861	0.084	0.09092
YDR533C	HSP31		0.88874	0.066	0.89456	0.048	-0.01069	0.066	0.00011
YDR534C	FIT1		1.01176	0.142	1.06423	0.036	-0.04867	0.142	0.00075
YDR535C	YDR535C		0.96532	0.023	1.04145	0.003	-0.07407	0.023	0.00019	status=JK
YDR536W	STL1		0.87741	0.155	1.04186	0.067	-0.16342	0.155	0.00148
YDR537C	YDR537C		1.03817	0.035	0.97407	0.034	0.08204	0.035	0.00037	status=JK
YDR538W	PAD1		0.74251	0.289	0.52949	0.036	0.21941	0.288	0.01422
YDR539W	FDC1		0.95494	0.234	0.91024	0.049	0.04598	0.234	0.00386
YDR540C	IRC4		1.09369	0.19	1.03945	0.062	0.05772	0.189	0.0014
YDR541C	YDR541C		1.03634	0.078	0.95601	0.074	0.09648	0.078	0.00012
YEL001C	IRC22		#NUM!	#NUM!	#NUM!	#NUM!	#NUM!	#NUM!	#NUM!	status=LK
YEL003W	GIM4		#NUM!	#NUM!	#NUM!	#NUM!	#NUM!	#NUM!	#NUM!	status=LK
YEL004W	YEA4		#NUM!	#NUM!	#NUM!	#NUM!	#NUM!	#NUM!	#NUM!	status=LK
YEL005C	VAB2		#NUM!	#NUM!	#NUM!	#NUM!	#NUM!	#NUM!	#NUM!	status=LK
YEL006W	YEA6		#NUM!	#NUM!	#NUM!	#NUM!	#NUM!	#NUM!	#NUM!	status=LK
YEL007W	MIT1		#NUM!	#NUM!	#NUM!	#NUM!	#NUM!	#NUM!	#NUM!	status=LK
YEL008W	YEL008W		#NUM!	#NUM!	#NUM!	#NUM!	#NUM!	#NUM!	#NUM!	status=LK
YEL010W	YEL010W		#NUM!	#NUM!	#NUM!	#NUM!	#NUM!	#NUM!	#NUM!	status=LK
YEL011W	GLC3		#NUM!	#NUM!	#NUM!	#NUM!	#NUM!	#NUM!	#NUM!	status=LK
YEL012W	UBC8		#NUM!	#NUM!	#NUM!	#NUM!	#NUM!	#NUM!	#NUM!	status=LK
YEL013W	VAC8		#NUM!	#NUM!	#NUM!	#NUM!	#NUM!	#NUM!	#NUM!	status=LK
YEL014C	YEL014C		#NUM!	#NUM!	#NUM!	#NUM!	#NUM!	#NUM!	#NUM!	status=LK
YEL015W	EDC3		#NUM!	#NUM!	#NUM!	#NUM!	#NUM!	#NUM!	#NUM!	status=LK
YEL016C	NPP2		#NUM!	#NUM!	#NUM!	#NUM!	#NUM!	#NUM!	#NUM!	status=LK
YEL017C-A	PMP2		#NUM!	#NUM!	#NUM!	#NUM!	#NUM!	#NUM!	#NUM!	status=LK
YEL017W	GTT3		#NUM!	#NUM!	#NUM!	#NUM!	#NUM!	#NUM!	#NUM!	status=LK
YEL020C	YEL020C		#NUM!	#NUM!	#NUM!	#NUM!	#NUM!	#NUM!	#NUM!	status=LK
YEL023C	YEL023C		#NUM!	#NUM!	#NUM!	#NUM!	#NUM!	#NUM!	#NUM!	status=LK
YEL025C	YEL025C		#NUM!	#NUM!	#NUM!	#NUM!	#NUM!	#NUM!	#NUM!	status=LK
YEL028W	YEL028W		#NUM!	#NUM!	#NUM!	#NUM!	#NUM!	#NUM!	#NUM!	status=LK
YEL030W	ECM10		#NUM!	#NUM!	#NUM!	#NUM!	#NUM!	#NUM!	#NUM!	status=LK
YEL031W	SPF1		#NUM!	#NUM!	#NUM!	#NUM!	#NUM!	#NUM!	#NUM!	status=LK
YEL033W	MTC7		#NUM!	#NUM!	#NUM!	#NUM!	#NUM!	#NUM!	#NUM!	status=LK
YEL037C	RAD23		#NUM!	#NUM!	#NUM!	#NUM!	#NUM!	#NUM!	#NUM!	status=LK
YEL038W	UTR4		#NUM!	#NUM!	#NUM!	#NUM!	#NUM!	#NUM!	#NUM!	status=LK
YEL039C	CYC7		#NUM!	#NUM!	#NUM!	#NUM!	#NUM!	#NUM!	#NUM!	status=LK
YEL040W	UTR2		#NUM!	#NUM!	#NUM!	#NUM!	#NUM!	#NUM!	#NUM!	status=LK
YEL041W	YEF1		#NUM!	#NUM!	#NUM!	#NUM!	#NUM!	#NUM!	#NUM!	status=LK
YEL042W	GDA1		#NUM!	#NUM!	#NUM!	#NUM!	#NUM!	#NUM!	#NUM!	status=LK
YEL043W	YEL043W		#NUM!	#NUM!	#NUM!	#NUM!	#NUM!	#NUM!	#NUM!	status=LK
YEL047C	FRD1		#NUM!	#NUM!	#NUM!	#NUM!	#NUM!	#NUM!	#NUM!	status=LK
YEL048C	TCA17		#NUM!	#NUM!	#NUM!	#NUM!	#NUM!	#NUM!	#NUM!	status=LK
YEL049W	PAU2		#NUM!	#NUM!	#NUM!	#NUM!	#NUM!	#NUM!	#NUM!	status=LK
YEL052W	AFG1		#NUM!	#NUM!	#NUM!	#NUM!	#NUM!	#NUM!	#NUM!	status=LK
YEL053C	MAK10		#NUM!	#NUM!	#NUM!	#NUM!	#NUM!	#NUM!	#NUM!	status=LK
YEL056W	HAT2		#NUM!	#NUM!	#NUM!	#NUM!	#NUM!	#NUM!	#NUM!	status=LK
YEL057C	YEL057C		#NUM!	#NUM!	#NUM!	#NUM!	#NUM!	#NUM!	#NUM!	status=LK
YEL059W	YEL059W		#NUM!	#NUM!	#NUM!	#NUM!	#NUM!	#NUM!	#NUM!	status=LK
YEL060C	PRB1		#NUM!	#NUM!	#NUM!	#NUM!	#NUM!	#NUM!	#NUM!	status=LK
YEL061C	CIN8		#NUM!	#NUM!	#NUM!	#NUM!	#NUM!	#NUM!	#NUM!	status=LK
YEL062W	NPR2		#NUM!	#NUM!	#NUM!	#NUM!	#NUM!	#NUM!	#NUM!	status=LK
YEL063C	CAN1		#NUM!	#NUM!	#NUM!	#NUM!	#NUM!	#NUM!	#NUM!	status=LK
YEL064C	AVT2		#NUM!	#NUM!	#NUM!	#NUM!	#NUM!	#NUM!	#NUM!	status=LK
YEL065W	SIT1		#NUM!	#NUM!	#NUM!	#NUM!	#NUM!	#NUM!	#NUM!	status=LK
YEL066W	HPA3		#NUM!	#NUM!	#NUM!	#NUM!	#NUM!	#NUM!	#NUM!	status=LK
YEL067C	YEL067C		#NUM!	#NUM!	#NUM!	#NUM!	#NUM!	#NUM!	#NUM!	status=LK
YEL068C	YEL068C		#NUM!	#NUM!	#NUM!	#NUM!	#NUM!	#NUM!	#NUM!	status=LK
YEL071W	DLD3		#NUM!	#NUM!	#NUM!	#NUM!	#NUM!	#NUM!	#NUM!	status=LK
YER001W	MNN1		#NUM!	#NUM!	#NUM!	#NUM!	#NUM!	#NUM!	#NUM!	status=LK
YER002W	NOP16		#NUM!	#NUM!	#NUM!	#NUM!	#NUM!	#NUM!	#NUM!	status=LK
YER004W	FMP52		#NUM!	#NUM!	#NUM!	#NUM!	#NUM!	#NUM!	#NUM!	status=LK
YER005W	YND1		#NUM!	#NUM!	#NUM!	#NUM!	#NUM!	#NUM!	#NUM!	status=LK
YER007C-A	TMA20		#NUM!	#NUM!	#NUM!	#NUM!	#NUM!	#NUM!	#NUM!	status=LK
YER007W	PAC2		#NUM!	#NUM!	#NUM!	#NUM!	#NUM!	#NUM!	#NUM!	status=LK
YER010C	YER010C		#NUM!	#NUM!	#NUM!	#NUM!	#NUM!	#NUM!	#NUM!	status=LK
YER011W	TIR1		#NUM!	#NUM!	#NUM!	#NUM!	#NUM!	#NUM!	#NUM!	status=LK
YER016W	BIM1		#NUM!	#NUM!	#NUM!	#NUM!	#NUM!	#NUM!	#NUM!	status=LK
YER019C-A	SBH2		#NUM!	#NUM!	#NUM!	#NUM!	#NUM!	#NUM!	#NUM!	status=LK
YER019W	ISC1		#NUM!	#NUM!	#NUM!	#NUM!	#NUM!	#NUM!	#NUM!	status=LK
YER020W	GPA2		#NUM!	#NUM!	#NUM!	#NUM!	#NUM!	#NUM!	#NUM!	status=LK
YER024W	YAT2		#NUM!	#NUM!	#NUM!	#NUM!	#NUM!	#NUM!	#NUM!	status=LK
YER027C	GAL83		#NUM!	#NUM!	#NUM!	#NUM!	#NUM!	#NUM!	#NUM!	status=LK
YER028C	MIG3		#NUM!	#NUM!	#NUM!	#NUM!	#NUM!	#NUM!	#NUM!	status=LK
YER030W	CHZ1		#NUM!	#NUM!	#NUM!	#NUM!	#NUM!	#NUM!	#NUM!	status=LK
YER031C	YPT31		#NUM!	#NUM!	#NUM!	#NUM!	#NUM!	#NUM!	#NUM!	status=LK
YER032W	FIR1		#NUM!	#NUM!	#NUM!	#NUM!	#NUM!	#NUM!	#NUM!	status=LK
YER033C	ZRG8		#NUM!	#NUM!	#NUM!	#NUM!	#NUM!	#NUM!	#NUM!	status=LK
YER034W	YER034W		#NUM!	#NUM!	#NUM!	#NUM!	#NUM!	#NUM!	#NUM!	status=LK
YER035W	EDC2		#NUM!	#NUM!	#NUM!	#NUM!	#NUM!	#NUM!	#NUM!	status=LK
YER038W-A	YER038W-A		#NUM!	#NUM!	#NUM!	#NUM!	#NUM!	#NUM!	#NUM!	status=LK
YER039C	HVG1		#NUM!	#NUM!	#NUM!	#NUM!	#NUM!	#NUM!	#NUM!	status=LK
YER039C-A	YER039C-A		#NUM!	#NUM!	#NUM!	#NUM!	#NUM!	#NUM!	#NUM!	status=LK
YER041W	YEN1		1.07438	0.054	1.06119	0.04	0.00992	0.053	0.00083	status=JK
YER042W	MXR1		0.84156	0.088	0.91672	0.035	-0.07947	0.088	0.00031
YER044C-A	MEI4		0.87169	0.17	0.96151	0.047	-0.08343	0.17	0.00197
YER045C	ACA1		1.16379	0.09	1.0399	0.058	0.11287	0.09	0.00013
YER046W	SPO73		1.06472	0.169	1.03462	0.014	0.03785	0.169	0.00108
YER046W-A	YER046W-A		0.94282	0.04	1.04897	0.039	-0.10804	0.04	2e-05
YER047C	SAP1		1.04127	0.013	1.03492	0.056	0.00253	0.013	5e-05	status=JK
YER048C	CAJ1		0.93412	0.179	1.03887	0.04	-0.1043	0.179	0.00188
YER049W	TPA1		0.97913	0.087	0.95616	0.041	0.01534	0.087	0.00019
YER051W	JHD1		1.05654	0.067	1.00984	0.04	0.04414	0.067	7e-05
YER052C	HOM3		0.91704	0.175	0.98493	0.008	-0.06796	0.175	0.00186
YER053C	PIC2		1.24336	0.061	1.09278	0.024	0.14512	0.061	0.0008	status=JK
YER054C	GIP2		1.24551	0.039	1.10546	0.015	0.13781	0.039	0.00033	status=JK
YER055C	HIS1		0.42323	0.131	0.33195	0.006	0.09238	0.131	0.00758
YER056C	FCY2		1.09559	0.056	1.05166	0.002	0.04546	0.056	4e-05
YER056C-A	RPL34A		0.81407	0.074	1.00416	0.007	-0.18582	0.074	0.00275	status=JK
YER057C	HMF1		1.22678	0.089	1.07194	0.079	0.17519	0.088	0.0001
YER059W	PCL6		1.0969	0.089	1.03826	0.051	0.05551	0.089	0.00015
YER060W	FCY21		0.97073	0.025	0.99093	0.011	-0.01899	0.025	0.00023	status=JK
YER060W-A	FCY22		1.18029	0.042	1.06006	0.024	0.12066	0.042	1e-05
YER061C	CEM1		0.83456	0.076	0.84354	0.004	-0.00738	0.076	0.00021
YER062C	HOR2		1.09685	0.092	1.1422	0.012	-0.04409	0.092	0.00016
YER063W	THO1		1.09517	0.016	0.98827	0.01	0.10921	0.016	7e-05	status=JK
YER064C	VHR2		0.9509	0.132	1.05505	0.03	-0.09866	0.132	0.00073
YER065C	ICL1		1.00075	0.046	0.95128	0.03	0.0366	0.046	3e-05
YER066C-A	YER066C-A		1.05699	0.103	1.04199	0.048	0.00543	0.103	0.00025
YER066W	RRT13		0.90604	0.033	0.95844	0.04	-0.05542	0.033	1e-05
YER067C-A	YER067C-A		1.01932	0.108	0.94897	0.004	0.07235	0.108	0.00032
YER067W	RGI1		1.09808	0.071	1.06384	0.052	0.02637	0.071	7e-05
YER069W	ARG5		0.59439	0.037	0.53974	0.053	0.04733	0.037	7e-05
YER071C	TDA2		1.04884	0.037	1.03676	0.048	-0.00371	0.037	1e-05
YER072W	VTC1		0.97836	0.151	0.99147	0.021	-0.01579	0.151	0.00099
YER073W	ALD5		1.10267	0.106	1.05788	0.043	0.03644	0.106	0.00024
YER074W	RPS24A		0.55466	0.156	0.71886	0.046	-0.1774	0.155	0.00567
YER075C	PTP3		1.05384	0.042	1.05854	0.02	-0.00094	0.042	0.00052	status=JK
YER077C	YER077C		1.03978	0.143	0.97785	0.016	0.05767	0.142	0.0007
YER078C	ICP55		0.85416	0.206	1.01526	0.02	-0.16187	0.206	0.00368
YER079W	YER079W		1.01117	0.036	1.02077	0.031	-0.01118	0.036	1e-05
YER080W	AIM9		1.00272	0.051	1.0406	0.033	-0.02837	0.051	4e-05
YER081W	SER3		0.86885	0.143	0.98484	0.059	-0.09879	0.143	0.00121
YER083C	GET2		0.82699	0.131	0.88518	0.052	-0.06621	0.13	0.00106
YER084W	YER084W		1.14193	0.109	1.09738	0.097	0.04265	0.109	0.00024
YER085C	YER085C		1.04232	0.086	1.13413	0.017	-0.08741	0.085	0.00015
YER087C-A	YER087C-A		1.18672	0.144	1.14323	0.018	0.04675	0.144	0.00049
YER088C	DOT6		1.00354	0.1	0.9202	0.013	0.08805	0.1	0.00027
YER089C	PTC2		0.88319	0.125	1.06695	0.15	-0.21271	0.125	0.00077
YER090W	TRP2		0.8766	0.194	0.92059	0.018	-0.05304	0.193	0.00284
YER091C	MET6		0.94672	0.132	1.04408	0.022	-0.09261	0.132	0.00073
YER091C-A	YER091C-A		1.07538	0.076	1.00784	0.021	0.06862	0.076	0.0001
YER092W	IES5		1.00316	0.093	0.86677	0.057	0.14018	0.092	0.00021
YER093C-A	AIM11		0.76996	0.047	0.62688	0.041	0.15538	0.047	6e-05
YER095W	RAD51		0.66772	0.051	0.83484	0.013	-0.16817	0.051	0.00193	status=JK
YER096W	SHC1		1.0266	0.078	1.05224	0.113	-0.02283	0.078	0.00012
YER097W	YER097W		1.02731	0.136	1.02154	0.065	-0.01032	0.136	0.00064
YER098W	UBP9		0.99051	0.164	0.94326	0.048	0.05112	0.163	0.00121
YER101C	AST2		0.86337	0.028	0.94585	0.111	-0.10544	0.028	0.00034	status=JK
YER106W	MAM1		1.14994	0.149	1.17527	0.101	-0.02406	0.148	0.00059
YER108C	YER108C		1.04114	0.099	0.94874	0.113	0.09464	0.099	0.00023
YER109C	FLO8		0.95653	0.158	0.87913	0.035	0.07514	0.158	0.00122
YER111C	SWI4		0.95831	0.08	0.94657	0.077	0.02189	0.08	0.00016
YER113C	TMN3		1.16315	0.024	1.02327	0.016	0.14678	0.024	0
YER114C	BOI2		1.06232	0.09	0.96201	0.03	0.08602	0.09	0.00017
YER115C	SPR6		1.11371	0.077	1.04041	0.016	0.07313	0.077	9e-05
YER116C	SLX8		0.35876	0.032	0.34197	0.064	0.03285	0.032	0.00019
YER117W	RPL23B		0.8457	0.092	0.88108	0.071	-0.0384	0.092	0.00035
YER118C	SHO1		1.12545	0.151	1.05139	0.058	0.07916	0.15	0.00065
YER119C	AVT6		0.91504	0.143	1.02402	0.014	-0.10216	0.142	0.00102
YER119C-A	YER119C-A		0.93759	0.013	0.82823	0.038	0.11937	0.013	7e-05	status=JK
YER120W	SCS2		0.94852	0.118	0.75963	0.081	0.18717	0.118	0.00053
YER121W	YER121W		0.92146	0.122	1.1111	0.002	-0.18856	0.121	0.00063
YER123W	YCK3		0.86023	0.112	0.77683	0.003	0.08309	0.112	0.0006
YER124C	DSE1		0.95612	0.152	0.90964	0.072	0.05777	0.152	0.00109
YER128W	VFA1		0.97929	0.055	0.96419	0.055	0.02718	0.055	5e-05
YER129W	SAK1		1.0037	0.031	1.06672	0.015	-0.05851	0.031	0.00032	status=JK
YER130C	YER130C		1.08099	0.129	1.01358	0.053	0.05479	0.128	0.00046
YER131W	RPS26B		0.72519	0.112	0.75418	0.005	-0.02993	0.112	0.00101
YER132C	PMD1		1.12429	0.139	0.93801	0.074	0.1962	0.139	0.00052
YER134C	YER134C		0.96297	0.119	0.93126	0.024	0.03215	0.119	0.00051
YER135C	YER135C		0.86509	0.206	1.07165	0.049	-0.19761	0.205	0.00352
YER137C	YER137C		1.20226	0.038	1.19659	0.043	-0.00276	0.038	0.00033	status=JK
YER139C	RTR1		0.93698	0.173	0.98112	0.05	-0.04669	0.173	0.0017
YER140W	YER140W		1.04518	0.101	1.07442	0.056	-0.03072	0.101	0.00025
YER142C	MAG1		0.96728	0.209	0.93429	0.028	0.03299	0.209	0.00267
YER143W	DDI1		0.78316	0.202	0.99223	0.015	-0.20134	0.201	0.00445
YER144C	UBP5		1.0572	0.048	0.9931	0.012	0.06097	0.048	3e-05
YER145C	FTR1		0.9726	0.153	1.02594	0.034	-0.05703	0.153	0.00105
YER149C	PEA2		1.06722	0.017	1.02859	0.045	0.0355	0.017	9e-05	status=JK
YER150W	SPI1		1.05369	0.075	0.9216	0.028	0.13625	0.075	0.0001
YER151C	UBP3		0.87316	0.068	0.78614	0.036	0.0796	0.067	0.00013
YER152C	YER152C		1.11486	0.17	0.97314	0.05	0.14835	0.17	0.00097
YER153C	PET122		0.7743	0.064	0.68876	0.019	0.08729	0.063	0.00015
YER155C	BEM2		1.01322	0.237	0.96647	0.069	0.04631	0.237	0.00337
YER156C	YER156C		0.90402	0.016	0.91691	0.011	-0.01633	0.016	0.0001	status=JK
YER158C	YER158C		1.23011	0.071	1.22384	0.016	0.0038	0.071	5e-05
YER161C	SPT2		0.98856	0.046	0.91877	0.018	0.07171	0.046	3e-05
YER162C	RAD4		0.46324	0.266	0.59857	0.183	-0.11044	0.265	0.0398
YER163C	GCG1		0.96098	0.136	0.97174	0.099	-0.03916	0.136	0.00077
YER164W	CHD1		1.01549	0.069	0.95196	0.02	0.06172	0.069	9e-05
YER166W	DNF1		1.04101	0.123	1.07251	0.066	-0.02565	0.122	0.00044
YER167W	BCK2		0.94265	0.031	1.01164	0.026	-0.06537	0.031	0.00036	status=JK
YER170W	ADK2		1.03904	0.072	1.01587	0.031	0.02042	0.072	9e-05
YER173W	RAD24		1.01437	0.165	1.09492	0.011	-0.07312	0.165	0.00117
YER174C	GRX4		0.95096	0.081	0.95247	0.066	0.00146	0.081	0.00017
YER175C	TMT1		0.96838	0.063	0.94383	0.018	0.02085	0.063	8e-05
YER176W	ECM32		0.932	0.027	0.96277	0.032	-0.02974	0.027	0.00028	status=JK
YER177W	BMH1		0.93415	0.046	0.89299	0.021	0.04393	0.046	0.0008	status=JK
YER178W	PDA1		0.73639	0.016	0.69569	0.031	0.04062	0.016	0.00016	status=JK
YER179W	DMC1		0.90112	0.119	0.91929	0.027	-0.01494	0.119	0.00063
YER180C	ISC10		0.90083	0.119	0.97131	0.037	-0.0779	0.118	0.00062
YER181C	YER181C		0.9426	0.009	0.97159	0.017	-0.02494	0.009	3e-05	status=JK
YER182W	FMP10		1.08829	0.037	1.01492	0.015	0.07671	0.037	0.00038	status=JK
YER183C	FAU1		1.07548	0.18	1.07436	0.057	0.02238	0.18	0.00127
YER184C	YER184C		1.23069	0.037	1.068	0.009	0.16515	0.037	0.00029	status=JK
YER185W	PUG1		1.0472	0.046	1.0302	0.008	0.02196	0.046	2e-05
YER186C	YER186C		0.95402	0.082	0.93166	0.06	0.02158	0.082	0.00017
YER187W	YER187W		1.17936	0.164	1.14171	0.057	0.02505	0.164	0.00073
YER188W	YER188W		1.09043	0.121	1.02617	0.016	0.05741	0.121	0.00037
YFL001W	DEG1		0.54098	0.02	0.61249	0.016	-0.06727	0.02	1e-05
YFL003C	MSH4		1.15515	0.032	#NUM!	#NUM!	#NUM!	#NUM!	1e-05
YFL004W	VTC2		0.98175	0.04	0.83668	0.187	0.15558	0.04	2e-05
YFL006W	YFL006W		1.00541	0.191	0.95155	0.049	0.0601	0.191	0.00183
YFL007W	BLM10		0.97692	0.053	0.95273	0.049	0.02475	0.052	4e-05
YFL010C	WWM1		0.6355	0.46	0.91943	0.13	-0.31316	0.459	0.06994
YFL010W-A	AUA1		1.14983	0.099	1.25407	0.007	-0.09997	0.099	0.00017
YFL011W	HXT10		1.04568	0.253	0.98812	0.063	0.06629	0.252	0.00369
YFL012W	YFL012W		1.05009	0.032	1.05996	0.049	0.00501	0.032	1e-05
YFL013C	IES1		0.7801	0.044	0.90964	0.163	-0.13878	0.044	5e-05
YFL013W-A	YFL013W-A		0.86795	0.097	0.92522	0.036	-0.06721	0.097	0.00038
YFL014W	HSP12		1.04675	0.085	1.03414	0.023	0.00594	0.085	0.00015
YFL015C	YFL015C		1.11149	0.345	1.14683	0.149	-0.05507	0.344	0.00758
YFL018C	LPD1		1.08278	0.128	0.97737	0.068	0.10787	0.127	0.00045
YFL019C	YFL019C		1.03887	0.077	1.07503	0.001	-0.0343	0.076	0.00011
YFL020C	PAU5		1.03905	0.091	1.02471	0.01	0.01919	0.09	0.00018
YFL021W	GAT1		1.11835	0.008	1.1465	0.018	-0.03125	0.008	2e-05	status=JK
YFL023W	BUD27		0.76562	0.076	0.83435	0.005	-0.06695	0.076	0.00027
YFL025C	BST1		1.07369	0.072	1.07111	0.022	0.00493	0.072	8e-05
YFL026W	STE2		0	0	0.00071	0.001	-0.00035	0	#NUM!	status=JK
YFL027C	GYP8		1.03691	0.15	1.05022	0.041	-0.0133	0.149	0.00081
YFL028C	CAF16		1.13409	0.017	1.08137	0.045	0.06367	0.017	7e-05	status=JK
YFL030W	AGX1		1.01926	0.123	0.95168	0.048	0.05516	0.123	0.00048
YFL031W	HAC1		0.95154	0.152	0.98084	0.108	-0.01658	0.152	0.00109
YFL032W	YFL032W		0.86092	0.111	1.02678	0.127	-0.14768	0.111	0.00059
YFL033C	RIM15		1.01949	0.06	1.02535	0.075	-0.01782	0.06	6e-05
YFL034C-A	RPL22B		1.22383	0.176	1.07668	0.046	0.14041	0.176	0.00081
YFL034W	YFL034W		0.95343	0.076	1.01963	0.026	-0.05913	0.076	0.00014
YFL035C-B	YFL035C-B		1.16438	0.058	1.06024	0.102	0.13084	0.058	3e-05
YFL036W	RPO41		0.68239	0.032	0.78912	0.031	-0.10703	0.032	0.00072	status=JK
YFL040W	YFL040W		1.05604	0.051	1.00123	0.041	0.06123	0.051	0.00077	status=JK
YFL041W	FET5		1.04281	0.049	1.10003	0.071	-0.04788	0.049	0.00074	status=JK
YFL042C	YFL042C		1.02877	0.107	0.98461	0.026	0.04745	0.106	0.0003
YFL043C	YFL043C		0.98119	0.099	0.97633	0.069	-0.00788	0.099	0.00028
YFL044C	OTU1		1.01454	0.079	1.02864	0.075	-0.03061	0.079	0.00013
YFL046W	FMP32		1.20841	0.074	1.08165	0.052	0.11624	0.074	6e-05
YFL047W	RGD2		0.97431	0.143	1.05373	0.006	-0.08027	0.143	0.00086
YFL048C	EMP47		1.16342	0.112	1.18268	0.019	-0.02858	0.112	0.00024
YFL049W	SWP82		0.94556	0.115	1.00785	0.11	-0.04405	0.115	0.00049
YFL050C	ALR2		1.01011	0.027	1.1357	0.012	-0.12181	0.027	0.00024	status=JK
YFL051C	YFL051C		1.14638	0.154	1.01448	0.054	0.13039	0.154	0.00066
YFL052W	YFL052W		0.98884	0.028	1.09075	0.037	-0.10954	0.028	0.00027	status=JK
YFL053W	DAK2		1.12115	0.1	1.09508	0.015	0.01892	0.1	0.0002
YFL054C	YFL054C		1.23937	0.124	1.13336	0.047	0.1193	0.123	0.00027
YFL055W	AGP3		1.16399	0.094	1.07457	0.046	0.09868	0.094	0.00015
YFL056C	AAD6		1.06307	0.183	1.09003	0.079	-0.01817	0.182	0.00136
YFL063W	YFL063W		1.13126	0.096	1.14521	0.037	-0.01488	0.096	0.00017
YFR006W	YFR006W		1.02917	0.106	0.92352	0.028	0.11338	0.106	0.0003
YFR007W	YFH7		0.88107	0.136	0.9493	0.032	-0.07003	0.136	0.00099
YFR008W	FAR7		0.80956	0.067	0.92855	0.035	-0.11137	0.066	0.00225	status=JK
YFR009W	GCN20		1.04117	0.065	0.9962	0.064	0.05082	0.065	7e-05
YFR010W	UBP6		0.61481	0.072	0.5769	0.011	0.03945	0.072	0.00044
YFR011C	AIM13		0.89517	0.011	0.76682	0.059	0.14394	0.011	5e-05	status=JK
YFR012W	DCV1		0.96939	0.047	0.97113	0.033	0.00233	0.046	3e-05
YFR013W	IOC3		0.97588	0.056	0.96896	0.011	0.00289	0.056	5e-05
YFR014C	CMK1		1.00439	0.092	1.04563	0.036	-0.03222	0.092	0.00021
YFR015C	GSY1		1.12007	0.099	1.13036	0.033	-0.00063	0.099	0.00019
YFR016C	YFR016C		1.07314	0.073	1.07154	0.034	-0.00426	0.073	9e-05
YFR017C	IGD1		1.13971	0.015	1.01459	0.029	0.12477	0.015	6e-05	status=JK
YFR018C	YFR018C		1.1132	0.066	1.0924	0.023	0.02612	0.065	6e-05
YFR019W	FAB1		0.7566	0.14	0.83087	0.057	-0.08291	0.14	0.0017
YFR020W	YFR020W		1.19713	0.069	1.06691	0.068	0.11465	0.068	5e-05
YFR021W	ATG18		0.8895	0.085	0.93368	0.05	-0.03618	0.085	0.00024
YFR022W	ROG3		0.97027	0.082	1.01473	0.019	-0.0404	0.082	0.00017
YFR023W	PES4		1.09736	0.015	0.94814	0.043	0.14939	0.015	6e-05	status=JK
YFR024C	YFR024C		0.89224	0.035	1.0234	0.039	-0.12174	0.035	0.00052	status=JK
YFR024C-A	LSB3		1.18047	0.126	1.17115	0.076	0.01724	0.126	0.00033
YFR025C	HIS2		0.4446	0.056	0.42965	0.061	0.03133	0.056	0.00054
YFR026C	ULI1		1.01094	0.021	1.00931	0.008	0.00104	0.021	0
YFR030W	MET10		0.93598	0.047	0.94297	0.022	0.00016	0.047	4e-05
YFR031C-A	RPL2A		0.987	0.03	1.03305	0.027	-0.04397	0.03	1e-05
YFR032C	RRT5		1.12991	0.049	1.07157	0.109	0.0847	0.049	0.00062	status=JK
YFR032C-A	RPL29		0.80578	0.02	0.8506	0.018	-0.0395	0.02	0.00021	status=JK
YFR033C	QCR6		1.00996	0.036	0.98681	0.041	0.03129	0.036	1e-05
YFR034C	PHO4		1.06674	0.017	1.04932	0.03	0.01451	0.017	8e-05	status=JK
YFR035C	YFR035C		1.12623	0.118	0.99751	0.007	0.12652	0.117	0.00031
YFR038W	IRC5		0.99742	0.112	0.94384	0.042	0.05428	0.112	0.00039
YFR039C	YFR039C		0.88447	0.025	0.953	0.033	-0.07375	0.025	0.00027	status=JK
YFR040W	SAP155		0.91144	0.055	0.87268	0.051	0.04358	0.054	6e-05
YFR041C	ERJ5		1.09049	0.103	1.06644	0.043	0.00685	0.103	0.00296	status=JK
YFR043C	IRC6		1.21378	0.122	1.14926	0.034	0.06407	0.122	0.00028
YFR044C	DUG1		1.01942	0.082	1.00985	0.06	0.0179	0.082	0.00014
YFR045W	YFR045W		0.95393	0.009	1.06476	0.005	-0.11246	0.009	3e-05	status=JK
YFR046C	CNN1		1.15518	0.127	1.15547	0.04	-0.00573	0.127	0.00036
YFR047C	BNA6		0.95565	0.012	0.93266	0.132	-0.00546	0.012	5e-05	status=JK
YFR048W	RMD8		1.05483	0.087	1.02712	0.057	0.02197	0.087	0.00015
YFR049W	YMR31		1.0302	0.133	1.06899	0.03	-0.04085	0.133	0.00059
YFR053C	HXK1		1.01567	0.052	0.99376	0.055	0.0262	0.052	4e-05
YFR054C	YFR054C		1.10917	0.109	1.06928	0.075	0.03317	0.109	0.00026
YFR055W	IRC7		0.983	0.049	1.01386	0.031	-0.02315	0.049	3e-05
YFR056C	YFR056C		1.02897	0.08	0.96818	0.031	0.06671	0.08	0.00013
YFR057W	YFR057W		1.11454	0.119	1.17599	0.036	-0.06984	0.119	0.00033
YGL002W	ERP6		0.97593	0.043	0.99491	0.05	-0.02821	0.043	2e-05
YGL004C	RPN14		1.04535	0.039	0.9822	0.053	0.06336	0.039	1e-05
YGL005C	COG7		1.00147	0.083	1.07534	0.009	-0.07207	0.083	0.00016
YGL006W	PMC1		0.90336	0.105	0.91416	0.127	-0.0399	0.104	0.00042
YGL007W	YGL007W		0.75159	0.081	0.83867	0.041	-0.08034	0.081	0.00035
YGL009C	LEU1		0.98675	0.065	0.98043	0.029	0.01527	0.065	8e-05
YGL010W	YGL010W		1.21842	0.033	1.11459	0.099	0.09978	0.033	0.00024	status=JK
YGL013C	PDR1		0.89921	0.123	0.86994	0.01	0.03244	0.123	0.0007
YGL014W	PUF4		1.05011	0.065	0.99616	0.045	0.04485	0.065	6e-05
YGL015C	YGL015C		1.12503	0.047	1.07464	0.021	0.04507	0.047	2e-05
YGL016W	KAP122		0.76308	0.088	0.80048	0.017	-0.03656	0.088	0.00042
YGL017W	ATE1		1.06204	0.044	1.01608	0.057	0.05495	0.044	2e-05
YGL019W	CKB1		0.91202	0.007	0.98877	0.071	-0.08926	0.007	2e-05	status=JK
YGL020C	GET1		1.18408	0.006	1.11933	0.104	0.05624	0.006	1e-05	status=JK
YGL021W	ALK1		1.17467	0.006	1.11436	0.039	0.06414	0.006	1e-05	status=JK
YGL023C	PIB2		0.9391	0.065	0.90767	0.023	0.02542	0.065	9e-05
YGL024W	YGL024W		0.35728	0.021	0.39264	0.012	-0.03197	0.021	0.00118	status=JK
YGL026C	TRP5		0.00841	0.004	0.0005	0.001	0.00839	0.004	0.01812
YGL027C	CWH41		1.06623	0.101	1.01003	0.032	0.05891	0.101	0.00023
YGL028C	SCW11		1.17155	0.025	1.07962	0.034	0.09981	0.024	0
YGL029W	CGR1		0.92794	0.158	0.89831	0.233	0.03297	0.158	0.00133
YGL031C	RPL24A		0.61598	0.039	0.63537	0.045	-0.00697	0.039	7e-05
YGL032C	AGA2		1.19623	0.046	1.17358	0.048	0.02954	0.046	2e-05
YGL034C	YGL034C		1.11132	0.038	1.11632	0.01	-0.00456	0.038	1e-05
YGL035C	MIG1		0.98799	0.006	0.94385	0.006	0.04285	0.006	1e-05	status=JK
YGL036W	YGL036W		1.01681	0.04	1.03142	0.087	-0.02071	0.04	2e-05
YGL037C	PNC1		1.09691	0.013	1.14308	0.142	-0.05	0.013	5e-05	status=JK
YGL039W	YGL039W		0.96569	0.087	1.05151	0.064	-0.09498	0.087	0.0002
YGL041C	YGL041C		0.94126	0.012	0.98709	0.023	-0.03972	0.012	6e-05	status=JK
YGL042C	YGL042C		0.97262	0.049	1.06267	0.1	-0.10824	0.048	3e-05
YGL043W	DST1		0.83821	0.051	0.79623	0.015	0.04204	0.051	6e-05
YGL045W	RIM8		0.00025	0	0.16262	0.12	-0.1844	0	0.42265	status=JK
YGL046W	YGL046W		0.727	0.02	0.559	0.012	0.16282	0.02	0.00025	status=JK
YGL049C	TIF4632		1.06856	0.011	0.9244	0.054	0.13332	0.011	4e-05	status=JK
YGL050W	TYW3		0.98236	0.11	1.10555	0.037	-0.12725	0.11	0.00038
YGL051W	MST27		0.97747	0.092	1.03721	0.058	-0.04757	0.092	0.00023
YGL053W	PRM8		0.96254	0.044	1.06405	0.058	-0.0806	0.044	0.00068	status=JK
YGL054C	ERV14		0.93247	0.116	1.0709	0.151	-0.1491	0.116	0.00053
YGL056C	SDS23		1.02567	0.117	1.00234	0.062	0.02234	0.117	0.00041
YGL057C	GEP7		0.98049	0.057	0.68501	0.063	0.29801	0.057	0.00114	status=JK
YGL058W	RAD6		1.04638	0.048	1.00551	0.058	0.04284	0.048	0.00071	status=JK
YGL059W	PKP2		1.22074	0.011	0.99577	0.047	0.23605	0.011	3e-05	status=JK
YGL060W	YBP2		0.98898	0.048	1.01761	0.075	-0.02119	0.048	3e-05
YGL062W	PYC1		1.18084	0.08	1.19159	0.016	-0.0092	0.08	9e-05
YGL063W	PUS2		0.87576	0.066	0.87166	0.287	0.00698	0.065	0.00186	status=JK
YGL066W	SGF73		0.88092	0.002	0.79415	0.003	0.08642	0.002	0	status=JK
YGL067W	NPY1		1.06688	0.086	1.06696	0.032	0.00519	0.086	0.00014
YGL071W	AFT1		1.07444	0.138	0.92272	0.157	0.16408	0.137	0.00057
YGL077C	HNM1		0.93822	0.103	0.99971	0.054	-0.04582	0.103	0.00036
YGL078C	DBP3		0.8209	0.027	0.8082	0.07	-0.00675	0.027	1e-05
YGL079W	KXD1		0.9897	0.032	0.94647	0.029	0.05023	0.031	1e-05
YGL080W	FMP37		0.79085	0.082	0.71504	0.021	0.08497	0.082	0.0003
YGL081W	YGL081W		1.15878	0.118	1.10231	0.054	0.04965	0.118	0.00029
YGL082W	YGL082W		1.09607	0.066	1.0719	0.029	0.01789	0.066	6e-05
YGL083W	SCY1		0.98626	0.096	0.99069	0.02	-0.00761	0.096	0.00025
YGL084C	GUP1		0.86097	0.156	0.92928	0.055	-0.07143	0.156	0.0016
YGL085W	LCL3		1.00199	0.143	1.03223	0.065	-0.03585	0.142	0.00078
YGL086W	MAD1		0.99257	0.147	0.97192	0.041	0.01474	0.146	0.00087
YGL087C	MMS2		0.9464	0.022	0.87085	0.045	0.08025	0.022	0
YGL089C	MF(ALPHA)2		1.01153	0.12	1.02268	0.05	-0.01913	0.119	0.00045
YGL090W	LIF1		1.09254	0.019	1.03429	0.023	0.05768	0.019	0
YGL094C	PAN2		1.05943	0.026	1.07908	0.12	-0.0403	0.026	0
YGL096W	TOS8		0.91731	0.069	0.921	0.224	-0.01596	0.069	0.00012
YGL101W	YGL101W		1.02153	0.068	1.00568	0.006	0.0188	0.068	8e-05
YGL104C	VPS73		0.89661	0.084	0.96769	0.104	-0.08462	0.083	0.00022
YGL105W	ARC1		0.00124	0.002	0.0048	0.008	0.00124	0.002	0.42265	status=JK
YGL108C	YGL108C		1.1007	0.1	1.05417	0.001	0.04655	0.1	0.00021
YGL109W	YGL109W		1.0895	0.079	1.08224	0.018	0.00412	0.079	0.0001
YGL110C	CUE3		0.96204	0.104	0.95154	0.037	0.00767	0.103	0.00034
YGL114W	YGL114W		1.0299	0.067	0.96809	0.008	0.06201	0.067	0.00141	status=JK
YGL115W	SNF4		0.79729	0.078	0.90726	0.057	-0.09283	0.078	0.00026
YGL117W	YGL117W		1.10233	0.002	1.18285	0.034	-0.09954	0.002	0	status=JK
YGL118C	YGL118C		1.03895	0.082	1.057	0.042	-0.03884	0.082	0.00013
YGL121C	GPG1		1.08908	0.029	1.03229	0.012	0.05904	0.029	0.00023	status=JK
YGL124C	MON1		0.84645	0.066	0.90285	0.106	-0.07228	0.066	0.00013
YGL125W	MET13		1.14475	0.064	1.12039	0.035	0.01512	0.064	5e-05
YGL126W	SCS3		0.96019	0.026	1.0182	0.021	-0.05516	0.026	0.00025	status=JK
YGL127C	SOH1		0.58518	0.033	0.50746	0.051	0.0785	0.033	5e-05
YGL131C	SNT2		0.8649	0.03	0.95863	0.036	-0.0904	0.03	0.00041	status=JK
YGL132W	YGL132W		0.90375	0.054	0.9417	0.003	-0.03647	0.054	0.00117	status=JK
YGL133W	ITC1		0.97721	0.084	1.04072	0.023	-0.05953	0.084	0.00018
YGL136C	MRM2		0.15833	0.092	0.38409	0.163	-0.26688	0.092	0.04107
YGL138C	YGL138C		1.10887	0.143	1.16354	0.1	-0.05984	0.143	0.00058
YGL139W	FLC3		1.04247	0.084	1.02019	0.041	0.01898	0.084	0.00015
YGL140C	YGL140C		1.04866	0.014	1.00163	0.074	0.03839	0.014	6e-05	status=JK
YGL141W	HUL5		1.05261	0.178	0.98662	0.089	0.06119	0.178	0.0013
YGL144C	ROG1		1.08715	0.062	1.04894	0.055	0.02065	0.062	5e-05
YGL146C	RRT6		1.1074	0.043	1.10987	0.023	-0.00244	0.043	2e-05
YGL147C	RPL9A		1.12028	0.023	1.05608	0.02	0.06885	0.023	0.00014	status=JK
YGL148W	ARO2		0.89567	0.052	0.84892	0.055	0.03455	0.052	5e-05
YGL149W	YGL149W		0.86878	0.002	0.9813	0.071	-0.10649	0.002	0	status=JK
YGL151W	NUT1		0.7952	0.08	0.74169	0.098	0.07393	0.08	0.00028
YGL152C	YGL152C		1.05157	0.114	1.03447	0.096	0.0342	0.113	0.00034
YGL153W	PEX14		0.88297	0.024	0.85653	0.104	0.00331	0.024	1e-05
YGL154C	LYS5		0.42216	0.12	0.36856	0.095	0.07531	0.12	0.00593
YGL156W	AMS1		0.8995	0.077	0.91273	0.015	-0.01099	0.077	0.00017
YGL157W	ARI1		1.16385	0.032	1.1197	0.043	0.04814	0.032	1e-05
YGL158W	RCK1		1.04004	0.078	1.03673	0.082	0.01887	0.077	0.00011
YGL159W	YGL159W		0.94263	0.08	0.99776	0.027	-0.04889	0.08	0.00017
YGL160W	AIM14		0.89003	0.058	0.9105	0.078	-0.02156	0.058	8e-05
YGL161C	YIP5		1.03146	0.074	1.05877	0.036	-0.03317	0.074	0.0001
YGL162W	SUT1		1.08939	0.093	0.99796	0.037	0.09365	0.092	0.00017
YGL163C	RAD54		0.8923	0.01	0.86629	0.022	0.02425	0.01	4e-05	status=JK
YGL164C	YRB30		1.14679	0.161	1.13791	0.057	-0.00082	0.16	0.00074
YGL165C	YGL165C		1.16866	0.043	1.11089	0.014	0.05094	0.043	1e-05
YGL166W	CUP2		1.21707	0.044	1.05897	0.039	0.15617	0.044	1e-05
YGL167C	PMR1		0.741	0.025	0.76971	0.026	-0.02952	0.025	0.00037	status=JK
YGL168W	HUR1		0.70688	0.007	0.77827	0.045	-0.07923	0.007	3e-05	status=JK
YGL170C	SPO74		1.07321	0.085	1.04156	0.072	0.01302	0.085	0.00014
YGL173C	XRN1		0.49046	0.016	0.54276	0.039	-0.05204	0.016	0.00037	status=JK
YGL174W	BUD13		0.64467	0.056	0.74299	0.061	-0.10732	0.056	0.00018
YGL175C	SAE2		0.95104	0.094	0.9466	0.044	0.00329	0.094	0.00027
YGL176C	YGL176C		1.23204	0.068	1.16665	0.048	0.07055	0.067	5e-05
YGL177W	YGL177W		1.29816	0.091	1.19022	0.041	0.10118	0.091	9e-05
YGL179C	TOS3		1.22911	0.155	1.18558	0.03	0.04748	0.155	0.00055
YGL180W	ATG1		0.86232	0.157	0.88583	0.094	-0.01941	0.157	0.00162
YGL181W	GTS1		0.97506	0.057	1.01845	0.037	-0.04089	0.057	6e-05
YGL194C	HOS2		0.52251	0.036	0.46128	0.014	0.05975	0.036	9e-05
YGL195W	GCN1		0.81283	0.026	0.83841	0.056	-0.03456	0.026	0.00033	status=JK
YGL196W	DSD1		0.96567	0.071	0.99958	0.056	-0.0515	0.07	0.00011
YGL197W	MDS3		0.94991	0.014	0.90613	0.054	0.04418	0.014	8e-05	status=JK
YGL198W	YIP4		1.15745	0.154	1.09256	0.047	0.06505	0.154	0.00064
YGL199C	YGL199C		0.97402	0.153	0.97263	0.066	0.01704	0.153	0.00104
YGL202W	ARO8		0.89905	0.107	1.07165	0.037	-0.17603	0.106	0.00045
YGL203C	KEX1		0.95876	0.084	1.02964	0.014	-0.07605	0.084	0.00018
YGL205W	POX1		0.92256	0.095	0.96741	0.022	-0.03941	0.095	0.0003
YGL208W	SIP2		0.97295	0.118	0.97321	0.051	-0.00119	0.118	0.00049
YGL209W	MIG2		0.88595	0.122	0.93238	0.012	-0.0486	0.122	0.00071
YGL210W	YPT32		0.92053	0.02	0.94675	0.035	-0.0296	0.02	0.00016	status=JK
YGL211W	NCS6		1.00415	0.018	0.99759	0.008	0.00821	0.018	0.00011	status=JK
YGL212W	VAM7		0.73053	0.118	0.75667	0.025	-0.02473	0.118	0.00115
YGL213C	SKI8		1.11388	0.037	1.02848	0.011	0.08715	0.037	1e-05
YGL214W	YGL214W		0.11319	0.006	0.0804	0.053	0.04984	0.006	0.00096	status=JK
YGL215W	CLG1		1.04192	0.106	0.91684	0.023	0.11961	0.106	0.00029
YGL216W	KIP3		0.93115	0.24	0.95848	0.047	-0.01549	0.24	0.00445
YGL217C	YGL217C		1.05966	0.106	0.99325	0.019	0.06626	0.106	0.00027
YGL218W	YGL218W		0.78558	0.008	0.73419	0.035	0.03936	0.008	0
YGL219C	MDM34		0.93487	0.05	0.93932	0.023	-0.0002	0.05	4e-05
YGL221C	NIF3		0.95915	0.012	0.95705	0.024	0.00675	0.012	5e-05	status=JK
YGL222C	EDC1		1.15491	0.057	1.11345	0.038	0.03596	0.057	3e-05
YGL224C	SDT1		1.09874	0.109	1.07507	0.007	0.02552	0.109	0.00027
YGL226C-A	OST5		1.11411	0.147	1.19527	0.025	-0.07994	0.147	0.00062
YGL226W	MTC3		0.93549	0.068	0.90508	0.071	0.04173	0.068	0.00011
YGL227W	VID30		0.98235	0.032	1.04774	0.067	-0.06552	0.032	1e-05
YGL228W	SHE10		1.0406	0.006	1.02911	0.013	0.01128	0.006	1e-05	status=JK
YGL229C	SAP4		1.16093	0.169	1.12463	0.029	0.04365	0.169	0.00084
YGL230C	YGL230C		0.85739	0.011	0.97867	0.066	-0.1401	0.011	5e-05	status=JK
YGL231C	EMC4		1.05738	0.04	1.0613	0.037	-0.011	0.04	1e-05
YGL232W	TAN1		1.16012	0.086	1.18735	0.029	-0.02054	0.086	0.00011
YGL234W	ADE5		1.025	0.046	1.0391	0.051	-0.01408	0.046	2e-05
YGL235W	YGL235W		0.93933	0.086	0.73627	0.038	0.20612	0.086	0.00021
YGL236C	MTO1		0.97732	0.036	0.77562	0.022	0.19947	0.036	1e-05
YGL237C	HAP2		0.90411	0.077	0.74024	0.03	0.16556	0.077	0.00017
YGL241W	KAP114		1.0598	0.153	1.12164	0.027	-0.058	0.152	0.00081
YGL242C	YGL242C		1.02196	0.046	1.03672	0.058	-0.02342	0.046	2e-05
YGL243W	TAD1		0.9457	0.14	1.03552	0.028	-0.08796	0.14	0.00089
YGL244W	RTF1		0.58008	0.116	0.52704	0.093	0.02169	0.115	0.00211
YGL248W	PDE1		0.92496	0.068	1.00012	0.068	-0.07046	0.068	0.00011
YGL249W	ZIP2		1.14438	0.065	1.04051	0.018	0.10701	0.065	5e-05
YGL250W	RMR1		1.0294	0.108	1.00214	0.097	0.02423	0.108	0.00032
YGL251C	HFM1		1.18183	0.073	1.15555	0.03	0.03232	0.073	7e-05
YGL252C	RTG2		0.43782	0.075	0.47739	0.088	-0.05677	0.075	0.00136
YGL253W	HXK2		0.91133	0.031	0.94173	0.059	-0.01802	0.031	1e-05
YGL254W	FZF1		0.893	0.004	0.94935	0.024	-0.05604	0.004	1e-05	status=JK
YGL255W	ZRT1		0.87628	0.049	0.99459	0.051	-0.1283	0.049	5e-05
YGL256W	ADH4		1.13455	0.102	1.12998	0.018	0.00268	0.102	0.0002
YGL257C	MNT2		1.08931	0.054	1.12176	0.054	-0.03277	0.054	3e-05
YGL258W	VEL1		1.00504	0.126	0.95832	0.046	0.05437	0.126	0.00054
YGL259W	YPS5		1.15879	0.034	1.08088	0.075	0.05524	0.034	1e-05
YGL260W	YGL260W		1.10087	0.037	1.0618	0.027	0.04086	0.037	1e-05
YGL261C	PAU11		0.91996	0.023	0.88272	0.053	0.05147	0.023	0
YGL262W	YGL262W		1.13011	0.04	1.07246	0.044	0.05715	0.04	0.00042	status=JK
YGL263W	COS12		0.92812	0.088	1.02363	0.1	-0.11889	0.088	0.00023
YGR001C	YGR001C		0.99124	0.051	1.00812	0.103	-0.01191	0.051	4e-05
YGR003W	CUL3		1.02316	0.043	1.06236	0.125	-0.04532	0.043	2e-05
YGR004W	PEX31		0.95836	0.153	0.97334	0.052	-0.01787	0.152	0.00109
YGR007W	ECT1		0.93163	0.051	0.97332	0.001	-0.0414	0.051	4e-05
YGR008C	STF2		1.0444	0.057	1.03455	0.097	0.011	0.057	4e-05
YGR010W	NMA2		1.01099	0.084	0.98429	0.025	0.01239	0.084	0.00016
YGR011W	YGR011W		0.93627	0.098	0.95183	0.054	-0.01072	0.098	0.00031
YGR012W	YGR012W		1.13118	0.077	1.14507	0.041	-0.01125	0.077	9e-05
YGR014W	MSB2		1.13346	0.042	1.05674	0.029	0.07669	0.042	1e-05
YGR015C	YGR015C		1.08232	0.104	0.99863	0.04	0.08048	0.103	0.00024
YGR016W	YGR016W		1.08839	0.042	1.09178	0.021	-0.0076	0.042	2e-05
YGR017W	YGR017W		0.76944	0.053	0.77097	0.071	0.00215	0.053	9e-05
YGR018C	YGR018C		0.92481	0.056	0.92435	0.019	0.0042	0.056	6e-05
YGR019W	UGA1		0.96243	0.109	1.01384	0.092	-0.0565	0.109	0.0004
YGR021W	YGR021W		1.10542	0.012	0.93776	0.025	0.15307	0.012	4e-05	status=JK
YGR022C	YGR022C		0.8769	0.105	0.92355	0.045	-0.05402	0.105	0.00047
YGR023W	MTL1		1.11292	0.117	1.09043	0.042	0.01552	0.117	0.00032
YGR025W	YGR025W		1.15959	0.028	1.11934	0.009	0.04395	0.028	0.0002	status=JK
YGR026W	YGR026W		0.9526	0.141	0.95804	0.05	-0.00599	0.14	0.00087
YGR027C	RPS25A		0.71022	0.026	0.63967	0.077	0.08036	0.026	1e-05
YGR028W	MSP1		0.92253	0.096	0.90755	0.073	0.01762	0.095	0.0003
YGR031W	IMO32		0.99949	0.1	1.03084	0.035	-0.02174	0.1	0.00027
YGR032W	GSC2		0.98591	0.089	0.95402	0.106	0.02683	0.089	0.0002
YGR033C	TIM21		1.16495	0.099	1.16051	0.145	-0.01658	0.099	0.00017
YGR034W	RPL26B		1.01335	0.073	0.90789	0.114	0.10185	0.073	0.0001
YGR035C	YGR035C		0.93987	0.104	0.9129	0.022	0.03385	0.103	0.00037
YGR037C	ACB1		0.60212	0.019	0.87645	0.005	-0.27415	0.019	0.00032	status=JK
YGR038W	ORM1		0.8399	0.217	0.97947	0.021	-0.1345	0.216	0.00447
YGR039W	YGR039W		0.92538	0.126	0.99732	0.04	-0.06648	0.126	0.00068
YGR040W	KSS1		0.96507	0.095	0.9799	0.045	-0.02724	0.095	0.00026
YGR041W	BUD9		0.92884	0.017	1.01916	0.027	-0.09483	0.017	0.00012	status=JK
YGR042W	YGR042W		1.05288	0.137	1.04298	0.011	0.00812	0.137	0.0006
YGR043C	NQM1		1.10581	0.089	1.07972	0.028	0.02392	0.088	0.00014
YGR044C	RME1		1.13908	0.074	1.08873	0.025	0.04589	0.074	7e-05
YGR045C	YGR045C		1.15718	0.02	1.02803	0.018	0.13273	0.02	0
YGR049W	SCM4		0.99972	0.238	0.99533	0.115	0.01786	0.237	0.00353
YGR050C	YGR050C		1.22555	0.04	1.07912	0.006	0.14456	0.039	1e-05
YGR051C	YGR051C		1.40239	0.059	1.30319	0.099	0.11974	0.059	2e-05
YGR052W	FMP48		1.00837	0.072	1.02777	0.054	-0.0171	0.072	0.0001
YGR053C	YGR053C		0.99105	0.155	0.96798	0.048	0.0171	0.154	0.00102
YGR054W	YGR054W		1.05376	0.016	1.03893	0.044	0.01598	0.016	7e-05	status=JK
YGR055W	MUP1		1.06057	0.149	1.15139	0.123	-0.09048	0.148	0.00074
YGR058W	PEF1		1.01082	0.05	0.98569	0.087	0.0195	0.05	3e-05
YGR059W	SPR3		0.89561	0.092	0.85342	0.014	0.04303	0.092	0.0003
YGR061C	ADE6		1.02016	0.06	0.92877	0.021	0.09024	0.06	0.00117	status=JK
YGR066C	YGR066C		1.14766	0.14	1.1279	0.035	0.02667	0.14	0.0005
YGR067C	YGR067C		1.00435	0.05	1.10011	0.145	-0.07963	0.05	3e-05
YGR068C	ART5		1.01021	0.022	1.09403	0.124	-0.09132	0.022	0.00016	status=JK
YGR069W	YGR069W		1.24483	0.042	1.09526	0.019	0.14483	0.042	0.00038	status=JK
YGR070W	ROM1		1.18616	0.085	1.15413	0.056	0.01406	0.085	0.0001
YGR071C	ENV11		0.98313	0.031	0.90479	0.014	0.0802	0.031	1e-05
YGR072W	UPF3		0.85794	0.165	0.88164	0.039	-0.02807	0.165	0.0019
YGR077C	PEX8		0.76355	0.095	0.75161	0.051	0.02463	0.094	0.00052
YGR078C	PAC10		0.83766	0.171	0.82835	0.071	0.01279	0.17	0.00225
YGR079W	YGR079W		0.82971	0.181	0.99933	0.05	-0.18561	0.181	0.00274
YGR080W	TWF1		1.08006	0.113	1.04627	0.02	0.03686	0.113	0.00031
YGR081C	SLX9		0.43452	0.06	0.74212	0.069	-0.31281	0.06	0.00072
YGR084C	MRP13		1.08791	0.065	1.07844	0.01	0.00901	0.065	6e-05
YGR085C	RPL11B		0.86272	0.049	0.8652	0.033	0.00731	0.049	5e-05
YGR086C	PIL1		1.07315	0.082	1.10833	0.018	-0.04429	0.082	0.00012
YGR087C	PDC6		1.02553	0.008	1.02359	0.022	-0.00043	0.008	2e-05	status=JK
YGR088W	CTT1		1.11948	0.037	1.14629	0.059	-0.03652	0.037	1e-05
YGR089W	NNF2		0.96766	0.136	0.96064	0.083	0.00258	0.136	0.00076
YGR092W	DBF2		0.46046	0.045	0.49523	0.047	-0.04476	0.045	0.00026
YGR093W	YGR093W		1.03306	0.043	0.98197	0.094	0.05284	0.043	2e-05
YGR096W	TPC1		0.97541	0.143	0.9401	0.039	0.04208	0.143	0.00085
YGR097W	ASK10		0.9889	0.033	0.90214	0.012	0.08897	0.033	1e-05
YGR100W	MDR1		0.98923	0.059	1.00414	0.082	-0.01703	0.059	6e-05
YGR101W	PCP1		0.84873	0.017	0.86899	0.049	-0.01633	0.017	0
YGR105W	VMA21		0.36693	0.172	0.46991	0.036	-0.09811	0.171	0.02353
YGR106C	VOA1		1.0169	0.058	1.07484	0.022	-0.05843	0.058	5e-05
YGR107W	YGR107W		0.96993	0.072	0.96904	0.033	-0.00544	0.072	0.00011
YGR108W	CLB1		1.09634	0.077	0.96932	0.067	0.12699	0.077	9e-05
YGR109C	CLB6		1.0785	0.068	1.00338	0.008	0.07788	0.068	7e-05
YGR110W	CLD1		0.99036	0.005	0.99243	0.064	0.01016	0.005	1e-05	status=JK
YGR111W	YGR111W		0.93718	0.054	0.9378	0.005	-0.00123	0.054	5e-05
YGR117C	YGR117C		0.98602	0.096	0.94086	0.036	0.03849	0.096	0.00026
YGR118W	RPS23A		0.8989	0.062	0.91966	0.041	-0.02507	0.062	9e-05
YGR121C	MEP1		0.98144	0.082	1.02108	0.031	-0.04579	0.082	0.00016
YGR122C-A	YGR122C-A		1.14671	0.053	1.12924	0.14	0.02617	0.053	0.00072	status=JK
YGR122W	YGR122W		0.66579	0.038	0.98645	0.147	-0.3415	0.038	5e-05
YGR123C	PPT1		1.15861	0.066	1.13135	0.043	0.03116	0.066	5e-05
YGR124W	ASN2		0.94208	0.096	0.94101	0.053	0.00867	0.096	0.00029
YGR125W	YGR125W		0.76963	0.038	0.79377	0.048	-0.01582	0.038	3e-05
YGR126W	YGR126W		1.05312	0.006	1.18992	0.038	-0.12947	0.006	0
YGR127W	YGR127W		1.08622	0.077	1.09184	0.009	-0.01064	0.077	0.0001
YGR129W	SYF2		0.94433	0.055	0.98852	0.107	-0.01846	0.055	6e-05
YGR130C	YGR130C		1.06989	0.094	1.07242	0.06	0.0031	0.094	0.00019
YGR131W	FHN1		1.1395	0.028	1.09978	0.009	0.03877	0.028	0.0002	status=JK
YGR132C	PHB1		0.99379	0.074	0.91064	0.063	0.06849	0.073	0.00011
YGR133W	PEX4		0.98415	0.046	0.96757	0.06	0.03061	0.046	3e-05
YGR134W	CAF130		0.96888	0.075	1.03241	0.016	-0.06378	0.075	0.00013
YGR135W	PRE9		0.90755	0.062	0.97103	0.053	-0.07386	0.062	9e-05
YGR136W	LSB1		0.93256	0.005	0.95861	0.096	-0.02883	0.005	1e-05	status=JK
YGR137W	YGR137W		0.97676	0.06	1.06825	0.053	-0.09285	0.059	6e-05
YGR138C	TPO2		1.08971	0.019	1.15402	0.088	-0.05229	0.019	0.0001	status=JK
YGR139W	YGR139W		1.14019	0.067	1.21902	0.075	-0.06361	0.067	6e-05
YGR141W	VPS62		0.988	0.052	0.99483	0.103	-0.00253	0.052	4e-05
YGR142W	BTN2		0.81075	0.032	0.91692	0.044	-0.10602	0.031	0.0005	status=JK
YGR143W	SKN1		1.11361	0.099	1.12573	0.048	-0.00587	0.099	0.00019
YGR144W	THI4		1.14933	0.081	1.12842	0.069	0.0164	0.081	0.0001
YGR146C	ECL1		1.1317	0.065	1.06883	0.021	0.05169	0.065	5e-05
YGR148C	RPL24B		0.78317	0.008	0.7807	0.042	0.00057	0.008	4e-05	status=JK
YGR149W	YGR149W		1.09249	0.017	1.12767	0.013	-0.0388	0.017	8e-05	status=JK
YGR151C	YGR151C		1.23187	0.133	1.1588	0.089	0.06195	0.133	0.00034
YGR152C	RSR1		1.10124	0.064	1.01726	0.139	0.05841	0.064	5e-05
YGR153W	YGR153W		0.88444	0.078	0.91109	0.046	-0.03127	0.078	0.00019
YGR154C	GTO1		0.9341	0.139	0.97833	0.047	-0.05277	0.139	0.00089
YGR157W	CHO2		0.59369	0.047	0.482	0.037	0.11919	0.046	0.00013
YGR161C	RTS3		1.04857	0.03	1.04431	0.055	0.0198	0.03	1e-05
YGR163W	GTR2		0.86459	0.017	0.92719	0.035	-0.06847	0.017	0.00014	status=JK
YGR164W	YGR164W		1.09954	0.092	1.09377	0.003	0.00413	0.092	0.00016
YGR166W	TRS65		0.93461	0.098	0.91092	0.012	0.02054	0.098	0.00031
YGR168C	YGR168C		0.92151	0.075	0.91942	0.013	0.00622	0.074	0.00015
YGR169C	PUS6		1.02879	0.091	1.0478	0.046	-0.0108	0.091	0.00019
YGR170W	PSD2		0.99207	0.064	1.03299	0.013	-0.04151	0.064	7e-05
YGR173W	RBG2		1.01477	0.059	1.0198	0.029	-0.00732	0.059	5e-05
YGR174C	CBP4		0.91186	0.015	0.75612	0.064	0.17143	0.015	0
YGR176W	YGR176W		1.1426	0.075	1.19045	0.049	-0.04362	0.075	8e-05
YGR177C	ATF2		1.11165	0.027	1.12022	0.053	0.00406	0.027	0
YGR178C	PBP1		1.11447	0.024	1.10689	0.021	0.00654	0.024	0.00016	status=JK
YGR181W	TIM13		1.02179	0.036	0.9222	0.031	0.09908	0.036	0.00042	status=JK
YGR182C	YGR182C		0.78915	0.026	0.82703	0.052	-0.0442	0.026	0.00037	status=JK
YGR183C	QCR9		0.99131	0.037	0.82609	0.038	0.17372	0.037	0.00047	status=JK
YGR184C	UBR1		1.10135	0.032	1.06565	0.033	0.03761	0.032	1e-05
YGR187C	HGH1		1.05108	0.039	1.02238	0.036	0.01656	0.039	1e-05
YGR188C	BUB1		0.60696	0.032	0.52883	0.071	0.07081	0.032	0.00093	status=JK
YGR189C	CRH1		1.11287	0.106	1.11156	0.071	0.00622	0.106	0.00024
YGR192C	TDH3		1.06657	0.008	1.04676	0.017	0.01567	0.008	2e-05	status=JK
YGR193C	PDX1		1.09169	0.083	1.08016	0.068	0.02504	0.083	0.00012
YGR194C	XKS1		1.04533	0.078	1.00496	0.028	0.03865	0.078	0.00011
YGR196C	FYV8		1.03395	0.018	1.04583	0.054	-0.00829	0.018	0.00011	status=JK
YGR197C	SNG1		1.1371	0.103	1.11929	0.052	0.0151	0.103	0.0002
YGR199W	PMT6		1.19942	0.094	1.17624	0.067	0.02935	0.094	0.00013
YGR200C	ELP2		0.75174	0.065	0.86811	0.012	-0.11889	0.065	0.00018
YGR201C	YGR201C		1.22426	0.051	1.17301	0.005	0.0506	0.051	2e-05
YGR202C	PCT1		1.19412	0.079	1.18365	0.049	0.01148	0.079	0.00146	status=JK
YGR203W	YCH1		0.92825	0.064	0.96721	0.026	-0.03939	0.064	9e-05
YGR205W	TDA10		1.06656	0.046	1.08782	0.048	-0.02752	0.046	2e-05
YGR206W	MVB12		0.98263	0.006	0.89139	0.005	0.08803	0.006	1e-05	status=JK
YGR207C	CIR1		1.25027	0.032	1.28069	0.003	-0.0338	0.032	0
YGR208W	SER2		1.10081	0.132	1.17451	0.117	-0.09894	0.131	0.00046
YGR209C	TRX2		0.98259	0.05	0.98572	0.059	-0.00844	0.05	4e-05
YGR210C	YGR210C		1.09211	0.099	1.07342	0.061	0.00078	0.098	0.0002
YGR212W	SLI1		1.15117	0.091	1.20809	0.011	-0.06374	0.091	0.00013
YGR213C	RTA1		1.15647	0.065	1.14475	0.023	0.02318	0.065	5e-05
YGR214W	RPS0A		0.90743	0.103	0.94037	0.03	-0.0329	0.102	0.00039
YGR217W	CCH1		0.93462	0.044	0.95647	0.01	-0.02439	0.044	3e-05
YGR221C	TOS2		0.92214	0.101	0.94413	0.006	-0.02287	0.101	0.00036
YGR223C	HSV2		0.87931	0.01	0.91144	0.052	-0.03122	0.01	0
YGR224W	AZR1		1.09293	0.027	1.11313	0.003	-0.0225	0.027	0
YGR225W	AMA1		0.88508	0.157	0.94949	0.035	-0.05697	0.157	0.0015
YGR226C	YGR226C		0.93824	0.016	1.00898	0.056	-0.08084	0.016	0.0001	status=JK
YGR227W	DIE2		1.1808	0.018	1.13818	0.062	0.03488	0.018	8e-05	status=JK
YGR228W	YGR228W		1.07492	0.012	1.03237	0.021	0.04155	0.012	4e-05	status=JK
YGR229C	SMI1		0.93291	0.031	0.83354	0.05	0.09686	0.031	1e-05
YGR230W	BNS1		1.15725	0.01	1.20199	0.026	-0.03954	0.01	2e-05	status=JK
YGR231C	PHB2		0.8683	0.008	0.717	0.014	0.14987	0.008	3e-05	status=JK
YGR232W	NAS6		1.02085	0.062	1.05581	0.052	-0.04434	0.062	6e-05
YGR233C	PHO81		1.06286	0.005	0.99979	0.043	0.05353	0.005	1e-05	status=JK
YGR234W	YHB1		1.13164	0.185	1.22583	0.018	-0.09249	0.185	0.00118
YGR235C	MOS2		1.02052	0.044	1.09033	0.03	-0.06533	0.044	2e-05
YGR236C	SPG1		0.98086	0.057	0.96035	0.02	0.02166	0.057	6e-05
YGR237C	YGR237C		1.1084	0.062	1.05271	0.101	0.04224	0.061	5e-05
YGR238C	KEL2		0.96039	0.098	0.94524	0.086	-0.01204	0.098	0.00029
YGR239C	PEX21		0.97502	0.094	0.90774	0.008	0.06503	0.093	0.00024
YGR241C	YAP1802		1.12041	0.087	1.0981	0.02	0.01956	0.087	0.00013
YGR242W	YGR242W		1.09847	0.118	1.14441	0.03	-0.05416	0.118	0.00034
YGR243W	FMP43		1.17747	0.01	1.15372	0.006	0.02205	0.01	2e-05	status=JK
YGR244C	LSC2		1.13775	0.047	1.13133	0.046	-0.00775	0.047	2e-05
YGR247W	CPD1		1.02086	0.092	1.00377	0.014	0.02229	0.092	0.0002
YGR248W	SOL4		0.91559	0.017	0.94549	0.015	-0.02725	0.017	0.00011	status=JK
YGR249W	MGA1		1.10171	0.073	1.15285	0.036	-0.05257	0.073	8e-05
YGR250C	YGR250C		0.82937	0.049	0.81213	0.074	0.01119	0.049	6e-05
YGR254W	ENO1		1.02336	0.011	1.01406	0.186	0.0203	0.011	4e-05	status=JK
YGR255C	COQ6		0.98513	0.151	1.01606	0.024	-0.02259	0.151	0.00097
YGR256W	GND2		0.97427	0.024	1.04471	0.033	-0.07095	0.024	0
YGR259C	YGR259C		0.91609	0.148	0.95365	0.099	-0.03366	0.148	0.00115
YGR260W	TNA1		0.86322	0.124	0.98026	0.043	-0.12102	0.123	0.00079
YGR261C	APL6		1.13258	0.023	1.12811	0.027	0.00499	0.023	0.00013	status=JK
YGR263C	SAY1		0.97622	0.029	1.14536	0.019	-0.16486	0.029	0.00029	status=JK
YGR266W	YGR266W		0.94273	0.074	0.91377	0.104	0.00857	0.074	0.00014
YGR268C	HUA1		1.08449	0.151	1.14482	0.009	-0.06495	0.151	0.00074
YGR269W	YGR269W		1.02608	0.062	0.91673	0.067	0.08972	0.062	6e-05
YGR270W	YTA7		0.6271	0.074	0.57411	0.059	0.03998	0.074	0.00045
YGR271W	SLH1		1.0313	0.136	1.16214	0.039	-0.14435	0.136	0.00063
YGR272C	YGR272C		0.89099	0.088	1.00033	0.055	-0.09767	0.087	0.00026
YGR273C	YGR273C		1.15522	0.093	1.11094	0.18	0.02271	0.093	0.00014
YGR275W	RTT102		0.98552	0.005	0.84896	0.049	0.1417	0.005	1e-05	status=JK
YGR276C	RNH70		0.97361	0.223	0.99633	0.085	-0.03951	0.223	0.00316
YGR279C	SCW4		0.73179	0.149	0.79266	0.22	-0.02971	0.149	0.00225
YGR281W	YOR1		1.052	0.091	0.96338	0.017	0.082	0.091	0.00018
YGR282C	BGL2		1.10945	0.028	1.06908	0.053	0.02777	0.028	0
YGR283C	YGR283C		0.93001	0.187	1.04227	0.041	-0.1203	0.187	0.00218
YGR284C	ERV29		1.04544	0.056	1.08337	0.038	-0.04379	0.056	4e-05
YGR286C	BIO2		0.95313	0.018	0.95102	0.039	-0.00459	0.018	0
YGR287C	IMA1		0.9673	0.081	0.94735	0.01	0.02374	0.081	0.00016
YGR288W	MAL13		1.01039	0.037	0.99397	0.045	0.01651	0.037	1e-05
YGR289C	MAL11		0.98453	0.101	0.92572	0.114	0.07639	0.101	0.0003
YGR290W	YGR290W		1.14014	0.05	1.13008	0.031	0.00458	0.05	2e-05
YGR291C	YGR291C		1.1366	0.066	#NUM!	#NUM!	#NUM!	#NUM!	5e-05
YGR292W	MAL12		1.08589	0.085	1.16605	0.03	-0.0795	0.085	0.00013
YGR295C	COS6		0.92358	0.022	0.94686	0.025	-0.02269	0.022	0.00019	status=JK
YHL002W	HSE1		0.92324	0.024	0.91559	0.03	0.00793	0.024	0
YHL003C	LAG1		1.02967	0.049	0.93575	0.027	0.09412	0.049	3e-05
YHL005C	YHL005C		0.9085	0.003	0.84144	0.03	0.05986	0.003	0	status=JK
YHL006C	SHU1		0.97643	0.042	0.951	0.054	0.02688	0.042	0.00061	status=JK
YHL007C	STE20		0.48911	0.068	0.53977	0.031	-0.03746	0.068	0.00634	status=JK
YHL008C	YHL008C		0.99414	0.049	1.03622	0.03	-0.04834	0.049	0.00083	status=JK
YHL009C	YAP3		1.09182	0.11	1.03115	0.022	0.0558	0.109	0.00028
YHL010C	ETP1		1.0985	0.031	1.00557	0.059	0.07972	0.031	0.00027	status=JK
YHL012W	YHL012W		1.0085	0.037	1.02087	0.039	-0.02495	0.037	1e-05
YHL013C	OTU2		0.99807	0.036	1.01375	0.092	0.00177	0.036	1e-05
YHL014C	YLF2		1.07119	0.048	1.07621	0.044	0.00072	0.048	2e-05
YHL016C	DUR3		0.9405	0.035	0.97007	0.084	-0.02761	0.035	1e-05
YHL017W	YHL017W		0.95909	0.036	0.98133	0.044	-0.0349	0.036	1e-05
YHL019C	APM2		0.99669	0.023	1.04357	0.02	-0.04758	0.023	0
YHL020C	OPI1		0.78104	0.013	0.7875	0.106	-0.00564	0.013	9e-05	status=JK
YHL021C	AIM17		0.93083	0.211	0.97408	0.027	-0.03192	0.21	0.00305
YHL022C	SPO11		0.97145	0.112	1.02347	0.047	-0.04024	0.112	0.00042
YHL023C	NPR3		0.85667	0.051	0.81258	0.067	0.02459	0.05	6e-05
YHL024W	RIM4		0.97608	0.073	1.02191	0.004	-0.04471	0.072	0.00011
YHL025W	SNF6		0.98458	0.097	0.99022	0.064	0.00581	0.097	0.00027
YHL026C	YHL026C		1.07097	0.055	0.98874	0.015	0.0822	0.055	0.00088	status=JK
YHL027W	RIM101		0.78719	0.004	0.71964	0.082	0.06963	0.003	1e-05	status=JK
YHL028W	WSC4		0.98397	0.03	0.97283	0.029	0.01036	0.03	0.00031	status=JK
YHL029C	OCA5		0.76571	0.051	0.81604	0.105	-0.06093	0.051	8e-05
YHL030W	ECM29		1.05705	0.085	1.02065	0.015	0.03122	0.085	0.00014
YHL031C	GOS1		0.78685	0.049	0.73104	0.038	0.05524	0.049	7e-05
YHL032C	GUT1		0.97082	0.034	0.94295	0.033	0.02517	0.034	1e-05
YHL033C	RPL8A		0.83929	0.101	0.79162	0.062	0.05258	0.101	0.00048
YHL034C	SBP1		0.96961	0.022	0.94172	0.023	0.0218	0.022	0
YHL035C	VMR1		1.01634	0.096	1.07042	0.067	-0.07101	0.096	0.00023
YHL036W	MUP3		1.04872	0.095	1.08837	0.035	-0.04225	0.095	0.0002
YHL037C	YHL037C		1.02669	0.019	0.94894	0.137	0.04462	0.019	0.00011	status=JK
YHL039W	EFM1		0.96182	0.007	1.00605	0.074	-0.05019	0.007	2e-05	status=JK
YHL040C	ARN1		1.022	0.015	0.97682	0.064	0.05316	0.015	0
YHL041W	YHL041W		0.96371	0.071	0.8794	0.027	0.07871	0.071	0.00011
YHL042W	YHL042W		1.03357	0.043	1.02845	0.021	-0.00168	0.043	2e-05
YHL043W	ECM34		0.99393	0.043	0.98175	0.014	0.0101	0.043	2e-05
YHL044W	YHL044W		0.92523	0.086	0.96546	0.079	-0.03814	0.086	0.00022
YHL045W	YHL045W		0.99657	0.073	1.02643	0.076	-0.04538	0.073	0.00011
YHL046C	PAU13		1.00715	0.079	1.02592	0.064	-0.02683	0.079	0.00013
YHL047C	ARN2		1.01825	0.07	1.01212	0.061	-0.01046	0.07	9e-05
YHR001W-A	QCR10		1.01902	0.048	1.00945	0.027	0.00909	0.048	3e-05
YHR003C	YHR003C		0.98454	0.089	0.95887	0.011	0.03025	0.088	0.0002
YHR004C	NEM1		0.96517	0.061	0.99096	0.04	-0.02834	0.061	7e-05
YHR005C	GPA1		0.00801	0.008	0.0215	0.001	-0.01306	0.008	0.14758
YHR006W	STP2		1.09741	0.04	1.09137	0.039	-0.00379	0.04	1e-05
YHR008C	SOD2		0.76257	0.078	0.86863	0.11	-0.08413	0.078	0.00029
YHR009C	TDA3		1.02156	0.053	1.0002	0.038	0.01991	0.053	4e-05
YHR012W	VPS29		0.77106	0.014	0.76203	0.08	0.01395	0.013	0
YHR014W	SPO13		0.83071	0.074	0.80395	0.02	0.02399	0.074	0.00019
YHR015W	MIP6		1.06578	0.061	1.03089	0.007	0.0373	0.061	5e-05
YHR016C	YSC84		1.12048	0.094	1.09917	0.05	0.01116	0.094	0.00016
YHR017W	YSC83		0.93339	0.088	0.77726	0.056	0.15252	0.088	0.00023
YHR018C	ARG4		0.43512	0.033	0.25666	0.021	0.17389	0.033	0.00012
YHR021C	RPS27B		0.74721	0.058	0.61823	0.037	0.13066	0.058	0.00013
YHR021W-A	ECM12		1.03876	0.013	1.15968	0.07	-0.10837	0.013	5e-05	status=JK
YHR022C	YHR022C		0.98494	0.081	0.81591	0.183	0.12152	0.081	0.00015
YHR025W	THR1		0.51569	0.063	0.50073	0.04	0.01183	0.063	0.00049
YHR028C	DAP2		0.90397	0.063	0.90724	0.068	-0.01286	0.063	9e-05
YHR029C	YHI9		1.02243	0.046	0.99249	0.012	0.03043	0.046	2e-05
YHR030C	SLT2		1.06071	0.081	0.96111	0.031	0.10571	0.081	0.00012
YHR031C	RRM3		1.06877	0.023	0.99658	0.016	0.07562	0.023	0.00016	status=JK
YHR032W	ERC1		1.14145	0.049	1.14724	0.041	0.00087	0.049	2e-05
YHR033W	YHR033W		0.91822	0.036	0.91416	0.062	0.00388	0.036	2e-05
YHR034C	PIH1		0.82931	0.111	0.85519	0.127	-0.01288	0.111	0.00066
YHR035W	YHR035W		1.0784	0.127	1.0489	0.094	0.01371	0.127	0.00044
YHR037W	PUT2		1.03653	0.035	0.98423	0.041	0.04552	0.035	1e-05
YHR039C	MSC7		0.97795	0.061	0.97609	0.069	0.00354	0.061	7e-05
YHR041C	SRB2		0.29092	0.045	0.27922	0.037	0.00074	0.045	0.001
YHR043C	DOG2		1.00022	0.1	1.02871	0.023	-0.02962	0.1	0.00027
YHR044C	DOG1		0.95561	0.086	0.94957	0.04	0.00468	0.086	0.0002
YHR045W	YHR045W		1.11574	0.091	1.05675	0.05	0.05062	0.091	0.00015
YHR046C	INM1		0.8908	0.146	0.96726	0.058	-0.07286	0.146	0.00119
YHR047C	AAP1		0.98664	0.164	1.01974	0.051	-0.04432	0.164	0.00123
YHR048W	YHK8		0.99043	0.102	0.95216	0.063	0.03174	0.101	0.00029
YHR049C-A	YHR049C-A		0.97269	0.078	1.0515	0.03	-0.08444	0.078	0.00014
YHR049W	FSH1		1.04049	0.086	0.94778	0.038	0.10312	0.085	0.00015
YHR050W	SMF2		1.08765	0.041	1.02704	0.056	0.06335	0.041	1e-05
YHR057C	CPR2		1.01522	0.118	1.09828	0.049	-0.09284	0.118	0.00043
YHR059W	FYV4		0	0	0	0	0	0	#NUM!	status=JK
YHR061C	GIC1		0.25799	0.065	0.26418	0.087	0.00896	0.065	0.00414
YHR066W	SSF1		0.74554	0.115	0.74811	0.035	-0.00933	0.115	0.00099
YHR067W	HTD2		0.63792	0.145	0.55966	0.065	0.06823	0.145	0.00311
YHR073W	OSH3		1.1736	0.03	1.11274	0.029	0.06612	0.03	0
YHR075C	PPE1		1.02399	0.042	1.01866	0.05	-0.00641	0.042	2e-05
YHR076W	PTC7		0.96133	0.015	0.92422	0.028	0.04032	0.015	8e-05	status=JK
YHR077C	NMD2		1.00183	0.064	0.93916	0.047	0.06078	0.063	7e-05
YHR078W	YHR078W		1.22538	0.041	1.1716	0.063	0.03328	0.041	1e-05
YHR079C	IRE1		1.08048	0.134	0.9969	0.013	0.08519	0.134	0.00052
YHR079C-B	YHR079C-B		1.08423	0.106	1.05568	0.035	0.03073	0.106	0.00026
YHR080C	YHR080C		0.96197	0.084	1.02323	0.08	-0.04858	0.084	0.00018
YHR081W	LRP1		0.72993	0.037	0.72761	0.072	-0.0239	0.036	3e-05
YHR082C	KSP1		0.93306	0.067	0.93915	0.019	-0.00719	0.067	0.0001
YHR086W	NAM8		1.15372	0.105	1.11454	0.016	0.04053	0.105	0.00021
YHR087W	RTC3		1.02478	0.169	1.06403	0.013	-0.0454	0.169	0.00121
YHR092C	HXT4		1.04414	0.049	1.02927	0.012	0.02017	0.049	3e-05
YHR093W	YHR093W		0.9979	0.069	1.00456	0.025	-0.00158	0.069	9e-05
YHR094C	HXT1		1.02131	0.081	1.07082	0.006	-0.05291	0.081	0.00014
YHR095W	YHR095W		1.11748	0.058	1.10511	0.064	0.02096	0.058	4e-05
YHR096C	HXT5		1.0267	0.067	0.98797	0.048	0.04172	0.067	8e-05
YHR097C	YHR097C		1.0278	0.051	1.0279	0.014	0.00049	0.051	3e-05
YHR103W	SBE22		1.00245	0.041	0.95817	0.03	0.0422	0.041	2e-05
YHR104W	GRE3		1.02588	0.031	1.02939	0.019	-0.00457	0.031	1e-05
YHR105W	YPT35		0.98143	0.041	0.99724	0.02	-0.0269	0.041	2e-05
YHR106W	TRR2		0.99367	0.207	1.03746	0.08	-0.02904	0.206	0.00239
YHR108W	GGA2		0.86465	0.134	0.92043	0.098	-0.07734	0.134	0.001
YHR109W	CTM1		1.00712	0.089	0.99898	0.042	0.00768	0.089	0.00019
YHR110W	ERP5		1.02069	0.035	1.04724	0.071	-0.00888	0.035	1e-05
YHR111W	UBA4		0.91058	0.122	0.93645	0.041	-0.03468	0.122	0.00065
YHR112C	YHR112C		1.02069	0.103	1.05103	0.013	-0.02764	0.103	0.00028
YHR113W	APE4		0.998	0.03	0.95048	0.062	0.05882	0.03	1e-05
YHR114W	BZZ1		1.16356	0.02	1.13178	0.07	0.0268	0.02	0.0001	status=JK
YHR115C	DMA1		1.03019	0.046	1.00471	0.034	0.02376	0.046	2e-05
YHR116W	COX23		0.86224	0.048	0.79791	0.034	0.05825	0.048	5e-05
YHR117W	TOM71		0.9245	0.073	0.9609	0.015	-0.03865	0.072	0.00013
YHR121W	LSM12		0.96148	0.164	0.9678	0.034	-0.00568	0.164	0.00134
YHR123W	EPT1		1.07516	0.016	0.98328	0.033	0.08947	0.016	7e-05	status=JK
YHR124W	NDT80		0.97864	0.11	0.96944	0.033	0.008	0.11	0.00039
YHR125W	YHR125W		1.0082	0.018	1.01501	0.034	-0.00503	0.018	0.00011	status=JK
YHR126C	ANS1		0.99227	0.053	0.9769	0.039	0.01188	0.053	4e-05
YHR127W	YHR127W		0.98447	0.022	1.01789	0.076	-0.03613	0.022	0
YHR129C	ARP1		1.00627	0.074	0.96629	0.068	0.02805	0.074	0.00011
YHR130C	YHR130C		0.96287	0.109	0.99739	0.029	-0.05214	0.109	0.0004
YHR131C	YHR131C		1.04013	0.104	1.04556	0.025	-0.01233	0.103	0.00027
YHR132C	ECM14		1.09905	0.052	1.11214	0.028	-0.00938	0.052	3e-05
YHR132W-A	IGO2		0.93895	0.008	0.95185	0.003	-0.01539	0.008	3e-05	status=JK
YHR133C	NSG1		0.94928	0.124	0.96711	0.029	-0.02864	0.124	0.00061
YHR134W	WSS1		0.90213	0.004	0.88313	0.034	0.02092	0.004	1e-05	status=JK
YHR135C	YCK1		1.00117	0.006	1.00488	0.031	-0.00938	0.006	1e-05	status=JK
YHR136C	SPL2		1.1131	0.013	1.09944	0.032	0.01809	0.013	4e-05	status=JK
YHR137W	ARO9		1.12258	0.022	1.05141	0.032	0.06781	0.022	0
YHR138C	YHR138C		1.10256	0.094	1.11216	0.029	-0.00591	0.094	0.00017
YHR139C	SPS100		1.05316	0.012	1.01386	0.094	0.05009	0.012	4e-05	status=JK
YHR139C-A	YHR139C-A		1.07385	0.062	1.10431	0.036	-0.02931	0.061	5e-05
YHR140W	YHR140W		1.08695	0.047	1.04372	0.018	0.04891	0.047	2e-05
YHR142W	CHS7		1.17957	0.041	1.09879	0.044	0.08184	0.041	1e-05
YHR143W	DSE2		0.72338	0.115	0.73987	0.075	-0.02827	0.115	0.00109
YHR146W	CRP1		1.19284	0.035	1.15876	0.038	0.0356	0.035	1e-05
YHR150W	PEX28		0.97994	0.014	1.02786	0.04	-0.05053	0.014	7e-05	status=JK
YHR151C	MTC6		0.93635	0.056	0.98495	0.043	-0.05966	0.056	6e-05
YHR152W	SPO12		1.15547	0.012	1.10939	0.035	0.03729	0.012	4e-05	status=JK
YHR153C	SPO16		1.08336	0.046	1.03094	0.04	0.04925	0.046	2e-05
YHR154W	RTT107		1.01761	0.07	0.96125	0.061	0.04959	0.07	9e-05
YHR155W	YSP1		1.00538	0.088	1.13475	0.053	-0.13781	0.088	0.00018
YHR156C	LIN1		0.96531	0.093	0.88115	0.016	0.09061	0.093	0.00024
YHR157W	REC104		0.96181	0.121	1.0297	0.037	-0.05889	0.121	0.00054
YHR158C	KEL1		0.74812	0.052	0.76487	0.023	-0.02286	0.052	9e-05
YHR159W	TDA11		1.02505	0.08	1.02099	0.045	-0.00281	0.08	0.00013
YHR160C	PEX18		0.93895	0.1	1.07535	0.049	-0.12558	0.1	0.00033
YHR161C	YAP1801		1.03554	0.129	0.99897	0.029	0.03931	0.129	0.00053
YHR162W	MPC2		0.93139	0.012	1.00271	0.028	-0.06791	0.012	6e-05	status=JK
YHR163W	SOL3		0.92993	0.056	0.90088	0.029	0.03484	0.056	6e-05
YHR167W	THP2		1.03721	0.019	0.90779	0.024	0.13276	0.019	0.00011	status=JK
YHR171W	ATG7		0.91054	0.034	0.92157	0.017	-0.0105	0.034	1e-05
YHR176W	FMO1		1.02537	0.078	1.00951	0.006	0.01213	0.078	0.00012
YHR178W	STB5		0.55102	0.012	0.50652	0.016	0.03899	0.012	0.00016	status=JK
YHR179W	OYE2		1.098	0.102	1.0601	0.03	0.04054	0.102	0.00022
YHR180W	YHR180W		1.31782	0.108	1.25255	0.049	0.06446	0.108	0.00015
YHR181W	SVP26		1.20638	0.059	1.17725	0.004	0.02876	0.059	3e-05
YHR182W	YHR182W		1.09607	0.037	1.14169	0.06	-0.06188	0.037	1e-05
YHR184W	SSP1		1.05639	0.063	1.00681	0.041	0.04913	0.063	6e-05
YHR185C	PFS1		0.98435	0.061	0.95363	0.036	0.02436	0.061	6e-05
YHR189W	PTH1		0.88897	0.02	0.6736	0.004	0.21552	0.02	0.00016	status=JK
YHR191C	CTF8		1.00954	0.081	1.00135	0.043	0.01238	0.081	0.00014
YHR193C	EGD2		0.03619	0.007	0	0	0.03613	0.007	0.00212
YHR194W	MDM31		0.08392	0.017	0.36642	0.22	-0.24793	0.017	0.00234
YHR195W	NVJ1		1.10538	0.04	1.06355	0.022	0.04076	0.04	1e-05
YHR198C	AIM18		0.79819	0.013	0.65706	0.012	0.13914	0.013	0
YHR199C	AIM46		0.95557	0.089	1.00247	0.004	-0.04843	0.089	0.00022
YHR200W	RPN10		0.98524	0.025	0.94565	0.024	0.04221	0.025	0.00022	status=JK
YHR202W	YHR202W		0.99441	0.18	1.04232	0.016	-0.055	0.179	0.00158
YHR203C	RPS4B		0.72783	0.153	0.78021	0.054	-0.04567	0.153	0.00247
YHR204W	MNL1		0.99445	0.02	1.01402	0.052	-0.0353	0.02	0.00014	status=JK
YHR206W	SKN7		1.02772	0.034	1.06556	0.007	-0.03585	0.034	1e-05
YHR207C	SET5		0.96539	0.011	0.99199	0.011	-0.02863	0.011	4e-05	status=JK
YHR209W	CRG1		0.98112	0.044	0.98407	0.002	-0.00382	0.044	2e-05
YHR210C	YHR210C		1.05467	0.023	0.98314	0.048	0.06417	0.023	0.00016	status=JK
YIL001W	YIL001W		0.97094	0.024	1.03482	0.019	-0.06885	0.024	0.00021	status=JK
YIL002C	INP51		0.93255	0.042	0.90492	0.019	0.02007	0.042	2e-05
YIL005W	EPS1		0.94456	0.019	0.99703	0.071	-0.06664	0.019	0.00013	status=JK
YIL006W	YIA6		0.85976	0.021	0.87817	0.002	-0.01957	0.021	0.00019	status=JK
YIL007C	NAS2		0.92103	0.062	0.91131	0.005	0.01022	0.062	8e-05
YIL008W	URM1		0.85248	0.101	0.85334	0.048	-0.01149	0.101	0.00045
YIL009C-A	EST3		1.03098	0.106	1.05649	0.04	-0.02923	0.106	0.00029
YIL010W	DOT5		1.02148	0.018	1.0137	0.014	-0.00028	0.018	0.00011	status=JK
YIL011W	TIR3		0.03347	0.011	0.00035	0	0.03307	0.011	0.00811
YIL012W	YIL012W		1.0982	0.038	1.07493	0.007	0.02345	0.038	0.0004	status=JK
YIL013C	PDR11		1.13417	0.108	1.14438	0.071	-0.02529	0.108	0.00024
YIL014W	MNT3		1.07392	0.084	1.06924	0.02	0.00293	0.084	0.00013
YIL015C-A	YIL015C-A		0.9333	0.079	0.94929	0.004	-0.01721	0.079	0.00017
YIL015W	BAR1		0.98788	0.075	0.9582	0.013	0.02801	0.075	0.00012
YIL016W	SNL1		1.13219	0.031	1.14917	0.029	-0.0157	0.031	1e-05
YIL017C	VID28		0.99403	0.068	0.99165	0.06	-0.00122	0.068	9e-05
YIL020C	HIS6		0.51875	0.171	0.31988	0.044	0.19321	0.171	0.00899
YIL023C	YKE4		1.02744	0.075	1.04171	0.007	-0.01192	0.075	0.00011
YIL024C	YIL024C		1.14726	0.052	1.16939	0.007	-0.02433	0.052	3e-05
YIL025C	YIL025C		1.03953	0.014	0.99503	0.036	0.05034	0.014	6e-05	status=JK
YIL027C	EMC5		1.13847	0.041	1.06461	0.069	0.05901	0.041	0.00044	status=JK
YIL028W	YIL028W		0.9561	0.118	0.97187	0.041	-0.01027	0.118	0.00052
YIL029C	YIL029C		1.00352	0.04	0.93206	0.059	0.06654	0.04	0.00054	status=JK
YIL030C	SSM4		1.04594	0.017	1.09967	0.04	-0.0672	0.017	9e-05	status=JK
YIL032C	YIL032C		0.96399	0.013	0.94175	0.018	0.01913	0.013	6e-05	status=JK
YIL034C	CAP2		1.02794	0.017	1.05984	0.093	-0.03002	0.017	9e-05	status=JK
YIL035C	CKA1		1.07475	0.122	1.03522	0.038	0.03916	0.121	0.00039
YIL036W	CST6		0.84354	0.205	0.93097	0.091	-0.07084	0.204	0.00374
YIL037C	PRM2		0.96707	0.06	0.92302	0.023	0.04124	0.06	7e-05
YIL038C	NOT3		0.95718	0.042	0.97768	0.033	-0.02871	0.042	2e-05
YIL039W	TED1		1.0238	0.068	0.96083	0.037	0.05562	0.068	8e-05
YIL040W	APQ12		0.35628	0.021	0.28888	0.015	0.06778	0.021	6e-05
YIL041W	GVP36		0.94779	0.097	0.89396	0.109	0.05649	0.097	0.0003
YIL042C	PKP1		0.95735	0.046	0.91304	0.042	0.05185	0.046	3e-05
YIL043C	CBR1		1.10393	0.089	1.15053	0.062	-0.05157	0.089	0.00015
YIL044C	AGE2		0.77959	0.088	0.81646	0.03	-0.03749	0.088	0.00039
YIL045W	PIG2		1.07443	0.013	1.11948	0.014	-0.04475	0.013	0
YIL047C	SYG1		1.06168	0.009	1.09669	0.022	-0.03869	0.009	3e-05	status=JK
YIL049W	DFG10		0.96729	0.059	0.99404	0.023	-0.0274	0.059	6e-05
YIL050W	PCL7		1.0609	0.054	1.03247	0.057	0.02815	0.054	4e-05
YIL052C	RPL34B		0.94993	0.008	0.98657	0.045	-0.04052	0.008	2e-05	status=JK
YIL053W	RHR2		0.77015	0.077	0.75663	0.013	0.01366	0.077	0.00028
YIL054W	YIL054W		1.02782	0.061	1.06701	0.049	-0.0235	0.061	6e-05
YIL055C	YIL055C		1.00563	0.076	0.97169	0.053	0.02248	0.076	0.00012
YIL056W	VHR1		0.86783	0.048	0.88361	0.086	-0.03148	0.048	0.00104	status=JK
YIL057C	RGI2		1.07589	0.033	1.06478	0.01	0.00737	0.033	0.00031	status=JK
YIL058W	YIL058W		1.02631	0.05	1.00038	0.018	0.02462	0.05	3e-05
YIL059C	YIL059C		1.08619	0.04	1.0185	0.041	0.06303	0.04	1e-05
YIL060W	YIL060W		1.11151	0.095	1.04981	0.026	0.0543	0.095	0.00017
YIL064W	SEE1		0.85285	0.038	0.8974	0.04	-0.04124	0.038	3e-05
YIL065C	FIS1		0.68134	0.031	0.7654	0.022	-0.08074	0.031	0.00069	status=JK
YIL066C	RNR3		1.0288	0.137	1.03215	0.013	-0.00779	0.137	0.00064
YIL067C	YIL067C		0.96216	0.039	0.9293	0.072	0.04397	0.039	2e-05
YIL070C	MAM33		1.01369	0.063	1.04772	0.027	-0.03179	0.063	7e-05
YIL071C	PCI8		1.14258	0.041	1.05938	0.054	0.0935	0.041	1e-05
YIL072W	HOP1		1.08962	0.03	1.07632	0.01	0.00806	0.03	1e-05
YIL073C	SPO22		0.95021	0.012	0.83241	0.065	0.1203	0.012	5e-05	status=JK
YIL074C	SER33		0.99348	0.039	1.01461	0.028	-0.01603	0.039	2e-05
YIL076W	SEC28		1.08761	0.008	1.01382	0.027	0.0715	0.008	2e-05	status=JK
YIL077C	YIL077C		0.88998	0.088	0.86907	0.03	0.01524	0.088	0.00026
YIL079C	AIR1		1.09841	0.083	1.08652	0.048	0.01168	0.083	0.00012
YIL084C	SDS3		0.76153	0.102	0.72957	0.066	0.0173	0.102	0.00065
YIL085C	KTR7		1.01336	0.063	0.92747	0.163	0.12273	0.063	7e-05
YIL086C	YIL086C		0.85816	0.04	0.8777	0.021	-0.01985	0.04	3e-05
YIL087C	AIM19		1.0057	0.057	0.96984	0.007	0.03513	0.057	5e-05
YIL088C	AVT7		1.11694	0.025	1.03207	0.007	0.08596	0.025	0
YIL089W	YIL089W		1.1135	0.071	1.11713	0.045	-0.01494	0.071	7e-05
YIL090W	ICE2		0.48596	0.084	0.55476	0.04	-0.06391	0.084	0.00141
YIL092W	YIL092W		0.85864	0.053	0.92272	0.013	-0.06208	0.053	7e-05
YIL093C	RSM25		1.03963	0.075	1.0477	0.031	-0.00857	0.075	0.0001
YIL094C	LYS12		0.28638	0.046	0.33846	0.118	-0.0363	0.046	0.0011
YIL095W	PRK1		1.04159	0.046	1.08057	0.012	-0.04549	0.046	2e-05
YIL096C	YIL096C		1.06502	0.084	1.06216	0.034	0.00033	0.084	0.00014
YIL097W	FYV10		0.95107	0.06	0.90925	0.038	0.04408	0.059	7e-05
YIL098C	FMC1		0.93209	0.011	0.86228	0.038	0.06317	0.011	0
YIL099W	SGA1		1.05844	0.061	1.09152	0.046	-0.03245	0.061	5e-05
YIL100W	YIL100W		1.04087	0.078	1.0339	0.035	0.02289	0.078	0.00185	status=JK
YIL101C	XBP1		0.96836	0.004	1.00023	0.043	-0.04266	0.004	0	status=JK
YIL102C	YIL102C		1.08505	0.016	1.10872	0.058	-0.03258	0.016	0
YIL103W	DPH1		1.00507	0.012	0.99493	0.059	-0.00547	0.012	5e-05	status=JK
YIL105C	SLM1		1.07914	0.04	1.06828	0.045	0.00834	0.04	1e-05
YIL107C	PFK26		1.13298	0.046	1.04102	0.068	0.08882	0.046	2e-05
YIL108W	YIL108W		1.01704	0.097	1.02104	0.056	-0.00663	0.097	0.00024
YIL110W	HPM1		0.70333	0.063	0.72462	0.015	-0.02508	0.062	0.00019
YIL111W	COX5B		0.99963	0.062	0.89752	0.111	0.08188	0.062	6e-05
YIL112W	HOS4		0.88227	0.055	0.90599	0.008	-0.02864	0.055	7e-05
YIL113W	SDP1		0.99841	0.044	0.95172	0.009	0.04313	0.044	2e-05
YIL114C	POR2		1.05617	0.075	1.03568	0.043	0.03005	0.075	0.0001
YIL116W	HIS5		0.31098	0.041	0.33743	0.126	-0.03558	0.041	0.00062
YIL117C	PRM5		1.06091	0.041	1.04733	0.031	0.01888	0.041	2e-05
YIL119C	RPI1		1.01746	0.009	1.0192	0.032	-0.00335	0.009	3e-05	status=JK
YIL120W	QDR1		1.00763	0.048	1.03507	0.067	-0.01594	0.048	3e-05
YIL122W	POG1		0.88429	0.142	0.57485	0.166	0.28887	0.141	0.00111
YIL123W	SIM1		1.05111	0.069	1.04375	0.061	0.01125	0.069	8e-05
YIL124W	AYR1		0.95859	0.012	0.94573	0.051	-5e-05	0.012	5e-05	status=JK
YIL125W	KGD1		0.01609	0.014	0.01709	0.001	-0.00074	0.014	0.10324
YIL128W	MET18		0.81454	0.011	0.81432	0.035	-0.00914	0.011	6e-05	status=JK
YIL130W	ASG1		1.04711	0.094	1.02911	0.038	0.0184	0.094	0.0002
YIL131C	FKH1		0.83158	0.074	0.92662	0.219	-0.10112	0.074	0.00019
YIL132C	CSM2		0.85141	0.077	0.86662	0.043	-0.01995	0.076	0.0002
YIL133C	RPL16A		0.77074	0.068	0.82999	0.015	-0.06162	0.068	0.00019
YIL134W	FLX1		0.55915	0.041	0.60675	0.022	-0.03732	0.041	0.00011
YIL135C	VHS2		1.20619	0.026	1.21053	0.008	-0.00675	0.026	0
YIL136W	OM45		1.12478	0.02	1.21402	0.077	-0.09231	0.02	0.0001	status=JK
YIL137C	TMA108		0.88173	0.048	0.89826	0.036	-0.0185	0.048	4e-05
YIL138C	TPM2		0.9867	0.08	0.94219	0.046	0.0381	0.08	0.00014
YIL139C	REV7		1.01938	0.069	1.04062	0.086	-0.00909	0.069	9e-05
YIL140W	AXL2		1.12754	0.084	1.10706	0.062	0.02322	0.084	0.00011
YIL141W	YIL141W		1.13956	0.03	1.14384	0.015	-0.00518	0.03	0
YIL145C	PAN6		0.91133	0.079	0.95049	0.005	-0.03846	0.079	0.00018
YIL146C	ATG32		1.05959	0.048	1.05275	0.062	-0.01236	0.047	2e-05
YIL148W	RPL40A		1.02635	0.012	0.98326	0.021	0.04624	0.012	5e-05	status=JK
YIL149C	MLP2		1.04265	0.019	1.01295	0.04	0.02893	0.019	0
YIL151C	YIL151C		1.03641	0.087	0.97636	0.118	0.06566	0.087	0.00016
YIL152W	YIL152W		0.8584	0.098	0.89915	0.018	-0.04011	0.098	0.00041
YIL153W	RRD1		0.86908	0.056	0.89236	0.06	-0.01151	0.056	7e-05
YIL154C	IMP2'		0.82111	0.086	0.87261	0.035	-0.05549	0.086	0.00031
YIL155C	GUT2		1.01244	0.113	0.99454	0.041	0.02596	0.113	0.00038
YIL156W	UBP7		1.06652	0.011	1.12546	0.019	-0.06224	0.011	3e-05	status=JK
YIL157C	COA1		0.97368	0.076	0.9606	0.021	0.00047	0.076	0.00013
YIL158W	AIM20		0.97615	0.136	1.10213	0.191	-0.09975	0.136	0.00073
YIL159W	BNR1		0.89314	0.025	0.89661	0.034	0.0115	0.025	1e-05
[truncated: 2,323 more rows]

## Sheet: DMA LU Rep1
Array ORF	Array Name	Array annotation	Normalized colony size (EXPERIMENT)	Normalized colony std. dev. (EXPERIMENT)	Normalized colony size (CONTROL)	Normalized colony std. dev. (CONTROL)	Score	Score stdev	p-Value	Additional information
YAL002W	VPS8		0.7598	0.029	0.97017	0.111	-0.22216	0.029	0.00049	status=JK
YAL004W	YAL004W		0.95542	0.055	1.02732	0.031	-0.07093	0.055	5e-05
YAL005C	SSA1		0.80673	0.237	0.96664	0.119	-0.13688	0.237	0.00648
YAL007C	ERP2		1.02472	0.055	1.01044	0.093	0.01353	0.054	0.00094	status=JK
YAL008W	FUN14		1.06736	0.095	1.06374	0.045	0.00052	0.095	0.0002
YAL010C	MDM10		0.55989	0.135	0.75738	0.063	-0.21696	0.134	0.00364
YAL011W	SWC3		1.1529	0.098	0.96453	0.011	0.18669	0.098	0.00017
YAL013W	DEP1		0.59175	0.089	0.59939	0.048	-0.02549	0.089	0.00091
YAL014C	SYN8		1.09087	0.195	1.02224	0.073	0.0701	0.195	0.00153
YAL015C	NTG1		1.14052	0.102	1.01269	0.018	0.12546	0.102	0.00268	status=JK
YAL017W	PSK1		0.97196	0.075	1.11132	0.092	-0.14097	0.075	0.00013
YAL018C	YAL018C		1.07956	0.038	0.97232	0.067	0.08488	0.038	0.00042	status=JK
YAL019W	FUN30		1.11394	0.038	0.98907	0.115	0.09965	0.038	0.0004	status=JK
YAL020C	ATS1		1.02941	0.098	0.98354	0.084	0.03542	0.098	0.00024
YAL022C	FUN26		0.95955	0.071	1.00155	0.089	-0.03973	0.071	0.00011
YAL023C	PMT2		0.9821	0.087	1.05447	0.037	-0.07624	0.087	0.00019
YAL024C	LTE1		0.94369	0.075	0.91908	0.137	0.0142	0.075	0.00014
YAL026C	DRS2		0.49568	0.11	0.58809	0.117	-0.12056	0.11	0.00289
YAL027W	SAW1		0.95503	0.06	1.00587	0.074	-0.06529	0.06	0.00131	status=JK
YAL028W	FRT2		0.95838	0.195	1.06259	0.053	-0.1378	0.194	0.00222
YAL029C	MYO4		0.99262	0.174	1.03651	0.068	-0.03757	0.174	0.00144
YAL030W	SNC1		0.93131	0.122	0.9287	0.033	-0.00798	0.122	0.00061
YAL031C	GIP4		1.08032	0.016	0.96845	0.018	0.11289	0.016	8e-05	status=JK
YAL034C	FUN19		1.00816	0.089	1.0813	0.1	-0.1019	0.089	0.00019
YAL036C	RBG1		1.03365	0.086	0.98581	0.05	0.04227	0.086	0.00016
YAL037W	YAL037W		1.01388	0.042	1.03917	0.016	-0.02895	0.042	2e-05
YAL040C	CLN3		0.96773	0.008	0.89424	0.05	0.06639	0.008	2e-05	status=JK
YAL042W	ERV46		1.05222	0.037	1.08496	0.007	-0.03682	0.037	0.00042	status=JK
YAL043C-A	YAL043C-A		0.88071	0.117	1.04965	0.054	-0.18096	0.117	0.00063
YAL045C	YAL045C		1.05496	0.031	0.95233	0.078	0.08488	0.031	0.0003	status=JK
YAL046C	AIM1		1.01965	0.028	1.02425	0.042	0.01218	0.028	1e-05
YAL048C	GEM1		0.96996	0.03	0.95887	0.028	0.00849	0.03	1e-05
YAL049C	AIM2		0.95023	0.169	1.00744	0.06	-0.06251	0.169	0.00152
YAL051W	OAF1		0.90055	0.122	0.98819	0.08	-0.08757	0.122	0.00067
YAL053W	FLC2		1.06256	0.046	1.07134	0.009	-0.01713	0.046	2e-05
YAL054C	ACS1		1.09576	0.047	1.05748	0.069	0.03219	0.047	2e-05
YAL055W	PEX22		1.08039	0.095	1.06451	0.021	0.01012	0.095	0.00019
YAL056W	GPB2		0.88535	0.06	0.96667	0.052	-0.09221	0.06	9e-05
YAL058C-A	YAL058C-A		0.99435	0.095	1.00556	0.039	-0.01366	0.095	0.00024
YAL058W	CNE1		0.98587	0.062	1.06995	0.017	-0.08726	0.062	7e-05
YAL059W	ECM1		0.87899	0.089	0.90982	0.062	-0.0254	0.089	0.00029
YAL060W	BDH1		1.05551	0.032	0.98946	0.05	0.05708	0.032	0.0003	status=JK
YAL061W	BDH2		0.85993	0.214	1.07079	0.052	-0.21721	0.214	0.00404
YAL062W	GDH3		1.26106	0.042	1.06229	0.026	0.20841	0.042	1e-05
YAL064C-A	TDA8		0.96923	0.142	1.04306	0.03	-0.08211	0.142	0.00085
YAL065C	YAL065C		1.06269	0.116	0.94142	0.02	0.12575	0.116	0.00036
YAL066W	YAL066W		1.04345	0.062	1.01997	0.038	0.01976	0.061	6e-05
YAL067C	SEO1		1.03718	0.041	1.10322	0.058	-0.05411	0.041	2e-05
YAL068C	PAU8		1.0629	0.137	1.01562	0.017	0.04161	0.136	0.00058
YAR002C-A	ERP1		1.00985	0.112	1.09159	0.038	-0.08662	0.112	0.00037
YAR002W	NUP60		1.02731	0.068	1.01599	0.064	-0.00842	0.068	8e-05
YAR003W	SWD1		0.84609	0.154	0.80035	0.044	0.05222	0.153	0.0016
YAR014C	BUD14		0.6685	0.041	0.82977	0.089	-0.17826	0.041	6e-05
YAR015W	ADE1		0.85046	0.271	1.05885	0.009	-0.21634	0.271	0.0082
YAR018C	KIN3		0.83722	0.069	1.0047	0.097	-0.18445	0.069	0.00015
YAR020C	PAU7		0.84902	0.161	0.8787	0.091	-0.03059	0.161	0.00184
YAR023C	YAR023C		1.04857	0.016	1.04747	0.091	-0.00024	0.016	0
YAR027W	UIP3		0.98982	0.05	0.97364	0.094	-0.00109	0.05	4e-05
YAR028W	YAR028W		0.96872	0.085	0.97571	0.049	-0.01584	0.085	0.00019
YAR029W	YAR029W		1.01996	0.012	1.0257	0.051	-0.02093	0.012	5e-05	status=JK
YAR030C	YAR030C		0.99914	0.03	1.00905	0.068	-0.0197	0.03	1e-05
YAR031W	PRM9		1.03965	0.02	0.95647	0.034	0.07891	0.02	0.00012	status=JK
YAR035W	YAT1		1.09496	0.025	1.0916	0.127	-0.02502	0.025	0.00017	status=JK
YAR037W	YAR037W		1.08299	0.006	1.02835	0.086	0.07309	0.006	1e-05	status=JK
YAR040C	YAR040C		0.96211	0.081	0.98644	0.114	-0.00961	0.081	0.00016
YAR042W	SWH1		1.06612	0.026	1.09403	0.012	-0.03729	0.026	0.00019	status=JK
YAR043C	YAR043C		1.03933	0.191	0.9923	0.076	0.04507	0.191	0.00167
YAR044W	YAR044W		0.95431	0.195	1.0822	0.053	-0.13104	0.195	0.00228
YAR047C	YAR047C		0.94788	0.023	0.87963	0.112	0.06556	0.023	0.0002	status=JK
YAR050W	FLO1		1.13526	0.07	0.99294	0.086	0.12395	0.07	6e-05
YBL001C	ECM15		1.01849	0.104	1.03086	0.082	-0.00738	0.104	0.00029
YBL003C	HTA2		1.05089	0.019	0.95972	0.193	0.05315	0.019	0
YBL005W	PDR3		0.98512	0.08	0.95605	0.09	0.00647	0.08	0.00015
YBL007C	SLA1		0.69499	0.077	0.85231	0.114	-0.18641	0.077	0.00037
YBL008W	HIR1		1.30261	0.048	1.05068	0.297	0.21287	0.048	0.00046	status=JK
YBL009W	ALK2		1.07558	0.089	1.00082	0.069	0.07635	0.089	0.00016
YBL010C	YBL010C		0.97183	0.07	1.02016	0.072	-0.03776	0.07	0.00174	status=JK
YBL011W	SCT1		0.64064	0.16	0.73769	0.191	-0.05697	0.16	0.00405
YBL013W	FMT1		1.0346	0.21	0.77554	0.089	0.24847	0.21	0.00223
YBL015W	ACH1		1.06945	0.158	1.10277	0.178	0.00293	0.158	0.00088
YBL016W	FUS3		0.7399	0.038	0.98925	0.099	-0.25148	0.038	4e-05
YBL017C	PEP1		1.05189	0.038	1.01959	0.016	0.02357	0.038	1e-05
YBL019W	APN2		0.97188	0.045	1.04256	0.031	-0.08017	0.045	0.00071	status=JK
YBL021C	HAP3		0.84436	0.024	0.88984	0.129	-0.00607	0.024	1e-05
YBL024W	NCL1		1.09478	0.043	1.0205	0.022	0.07355	0.043	2e-05
YBL025W	RRN10		0.22758	0.015	0.16228	0.006	0.06295	0.015	8e-05
YBL027W	RPL19B		0.52578	0.184	0.76608	0.551	-0.26435	0.184	0.0106
YBL028C	YBL028C		1.07384	0.13	0.97452	0.023	0.10502	0.13	0.00048
YBL029W	YBL029W		1.04115	0.127	1.01958	0.02	0.01875	0.126	0.00049
YBL031W	SHE1		0.15913	0.022	0.49279	0.09	-0.32971	0.022	0.00608	status=JK
YBL032W	HEK2		1.01382	0.078	0.95165	0.065	0.07248	0.078	0.00012
YBL036C	YBL036C		1.1285	0.045	0.97533	0.066	0.16187	0.045	0.00053	status=JK
YBL037W	APL3		1.09164	0.056	0.99315	0.025	0.09077	0.056	0.00087	status=JK
YBL039C	URA7		0.85204	0.095	0.95863	0.073	-0.12701	0.095	0.00038
YBL042C	FUI1		1.01915	0.116	1.03668	0.009	-0.02349	0.116	0.0004
YBL043W	ECM13		1.07293	0.048	0.99811	0.062	0.06425	0.048	3e-05
YBL046W	PSY4		1.05251	0.03	1.10578	0.05	-0.04744	0.03	0.00026	status=JK
YBL047C	EDE1		0.98076	0.084	1.03795	0.038	-0.06474	0.084	0.00017
YBL048W	YBL048W		1.0323	0.103	0.99524	0.048	0.04182	0.102	0.00027
YBL049W	MOH1		0.98437	0.073	0.96287	0.075	0.02493	0.073	0.00011
YBL051C	PIN4		0.92139	0.118	1.03161	0.015	-0.11252	0.118	0.00057
YBL052C	SAS3		0.97349	0.053	0.89809	0.046	0.08574	0.053	4e-05
YBL053W	YBL053W		0.98862	0.035	1.01215	0.095	-0.01362	0.035	1e-05
YBL054W	TOD6		1.04668	0.052	0.96879	0.058	0.06334	0.052	0.00081	status=JK
YBL055C	YBL055C		0.87245	0.127	0.89026	0.106	-0.0543	0.127	0.00084
YBL056W	PTC3		1.04032	0.073	1.0383	0.009	-0.00394	0.073	9e-05
YBL057C	PTH2		1.02715	0.012	1.07068	0.034	-0.04198	0.012	4e-05	status=JK
YBL059W	YBL059W		0.88614	0.049	0.86289	0.081	-0.00294	0.049	5e-05
YBL060W	YEL1		1.02369	0.073	0.89224	0.121	0.1126	0.073	0.0001
YBL061C	SKT5		1.00827	0.088	0.9968	0.041	0.01514	0.088	0.00018
YBL062W	YBL062W		1.06737	0.052	1.008	0.02	0.05946	0.052	0.00079	status=JK
YBL063W	KIP1		1.05207	0.042	1.0664	0.074	-0.01672	0.042	2e-05
YBL064C	PRX1		0.96779	0.013	0.99858	0.061	-0.04945	0.013	6e-05	status=JK
YBL065W	YBL065W		1.07545	0.054	1.01469	0.106	0.03178	0.054	4e-05
YBL066C	SEF1		0.89993	0.1	1.03064	0.112	-0.10558	0.1	0.00037
YBL067C	UBP13		1.04997	0.029	0.96714	0.06	0.08878	0.029	0.00025	status=JK
YBL068W	PRS4		1.07642	0.063	1.05776	0.098	0.01649	0.063	5e-05
YBL069W	AST1		1.01945	0.055	1.03553	0.104	-0.00365	0.055	4e-05
YBL070C	YBL070C		0.91982	0.084	0.98961	0.079	-0.05328	0.084	0.00021
YBL071C	YBL071C		0.99422	0.047	0.94865	0.076	0.07239	0.047	0.00074	status=JK
YBL072C	RPS8A		0.47429	0.024	0.34853	0.072	0.11947	0.024	0.00089	status=JK
YBL075C	SSA3		1.12881	0.011	1.0077	0.082	0.09847	0.011	3e-05	status=JK
YBL078C	ATG8		0.87451	0.073	0.76321	0.111	0.09953	0.073	0.00016
YBL079W	NUP170		0.21977	0.022	0.41518	0.039	-0.19603	0.022	0.00027
YBL081W	YBL081W		0.95535	0.146	1.01969	0.062	-0.06968	0.145	0.00095
YBL082C	ALG3		1.11426	0.047	1.05857	0.068	0.06258	0.047	2e-05
YBL083C	YBL083C		1.09205	0.127	1.17728	0.009	-0.08512	0.127	0.00043
YBL085W	BOI1		1.01859	0.008	0.96104	0.022	0.05838	0.008	2e-05	status=JK
YBL086C	YBL086C		1.09011	0.009	1.015	0.057	0.06925	0.009	2e-05	status=JK
YBL087C	RPL23A		0.81555	0.123	0.95516	0.075	-0.15604	0.123	0.00093
YBL088C	TEL1		1.14506	0.034	1.04198	0.044	0.09726	0.034	1e-05
YBL089W	AVT5		0.95616	0.12	0.90433	0.015	0.05105	0.12	0.00053
YBL091C	MAP2		1.02753	0.04	0.99817	0.011	0.02105	0.04	2e-05
YBL091C-A	SCS22		1.06055	0.007	1.02608	0.012	0.02827	0.007	1e-05	status=JK
YBL094C	YBL094C		0.66682	0.293	0.72511	0.25	-0.09721	0.292	0.01979
YBL095W	YBL095W		0.97563	0.027	0.87426	0.069	0.10089	0.027	1e-05
YBL096C	YBL096C		0.99967	0.015	1.03744	0.121	-0.03095	0.015	0
YBL098W	BNA4		0.99778	0.072	1.01008	0.017	-0.01857	0.072	0.0001
YBL100C	YBL100C		1.05704	0.068	1.06427	0.049	-0.0048	0.068	7e-05
YBL101C	ECM21		0.97074	0.055	0.9723	0.004	-0.00597	0.055	5e-05
YBL102W	SFT2		0.96304	0.123	0.96719	0.012	-0.0099	0.123	0.00057
YBL103C	RTG3		0.17713	0.015	0.25192	0.018	-0.07714	0.015	0.00245	status=JK
YBL103C	RTG3		1.06818	0.082	1.05231	0.01	0.01351	0.082	0.00012
YBL104C	SEA4		1.05436	0.123	0.99394	0.102	0.05955	0.123	0.00043
YBL106C	SRO77		1.00002	0.1	1.01714	0.059	-0.02513	0.1	0.00027
YBL107C	MIC23		0.98068	0.071	0.99557	0.087	-0.00911	0.071	0.0001
YBR001C	NTH2		1.02773	0.081	0.94271	0.034	0.08542	0.081	0.00013
YBR005W	RCR1		1.09429	0.061	1.0858	0.054	0.0002	0.061	5e-05
YBR006W	UGA2		1.09426	0.046	1.16544	0.063	-0.03857	0.046	2e-05
YBR007C	DSF2		1.02624	0.026	1.1164	0.053	-0.08733	0.026	0.00021	status=JK
YBR008C	FLR1		1.10244	0.018	1.09192	0.058	0.01762	0.018	9e-05	status=JK
YBR009C	HHF1		0.90459	0.122	0.98986	0.173	-0.13262	0.121	0.00066
YBR010W	HHT1		0.84412	0.211	1.04901	0.049	-0.19199	0.21	0.00405
YBR012C	YBR012C		1.01141	0.02	0.98571	0.153	0.05254	0.02	0.00013	status=JK
YBR013C	YBR013C		0.94593	0.039	0.86652	0.197	0.05073	0.039	0.00057	status=JK
YBR014C	GRX7		0.93061	0.132	0.96985	0.043	-0.02224	0.132	0.00077
YBR015C	MNN2		0.84657	0.174	0.93528	0.098	-0.10721	0.174	0.00231
YBR016W	YBR016W		0.76443	0.134	0.83522	0.132	-0.06579	0.134	0.00144
YBR018C	GAL7		1.07953	0.034	1.02563	0.026	0.03651	0.034	0.00032	status=JK
YBR019C	GAL10		0.9162	0.147	0.96247	0.14	-0.04935	0.146	0.0011
YBR020W	GAL1		1.00938	0.059	1.01346	0.059	-0.00256	0.059	6e-05
YBR020W	GAL1		1.03609	0.037	1.0396	0.072	-0.00625	0.037	1e-05
YBR022W	POA1		0.81979	0.056	1.00013	0.066	-0.18087	0.056	0.00153	status=JK
YBR023C	CHS3		0.92892	0.054	1.01316	0.012	-0.09084	0.054	5e-05
YBR024W	SCO2		0.89217	0.082	0.94347	0.107	-0.07203	0.082	0.00021
YBR025C	OLA1		0.74126	0.236	1.01768	0.065	-0.29252	0.236	0.00817
YBR026C	ETR1		0.63016	0.139	0.79744	0.005	-0.16887	0.139	0.00284
YBR027C	YBR027C		1.26505	0.108	1.10327	0.041	0.16276	0.108	0.00017
YBR028C	YPK3		1.06091	0.102	1.02032	0.137	0.00476	0.102	0.00024
YBR030W	RKM3		1.14797	0.108	1.21165	0.075	-0.07196	0.108	0.00023
YBR031W	RPL4A		0.96405	0.011	1.00892	0.05	-0.0726	0.011	5e-05	status=JK
YBR032W	YBR032W		1.04821	0.01	0.97548	0.061	0.06615	0.01	3e-05	status=JK
YBR033W	EDS1		1.00011	0.071	1.00621	0.03	-0.00698	0.071	0.00168	status=JK
YBR034C	HMT1		1.08715	0.034	1.08	0.085	-0.01692	0.034	0.00033	status=JK
YBR036C	CSG2		0.23009	0.017	0.17518	0.006	0.05485	0.017	0.00188	status=JK
YBR040W	FIG1		1.12548	0.043	1.07612	0.036	0.0467	0.043	2e-05
YBR041W	FAT1		0.91568	0.108	0.98568	0.093	-0.05173	0.108	0.00045
YBR042C	CST26		1.03639	0.058	0.99396	0.01	0.03783	0.058	0.00104	status=JK
YBR043C	QDR3		1.11057	0.042	1.03226	0.001	0.07493	0.042	1e-05
YBR044C	TCM62		0.97137	0.02	0.98682	0.054	-0.01161	0.02	0.00014	status=JK
YBR045C	GIP1		0.93953	0.024	0.98561	0.026	-0.05328	0.024	0
YBR046C	ZTA1		1.09357	0.151	1.08303	0.018	0.01395	0.151	0.00072
YBR047W	FMP23		0.89669	0.124	1.03094	0.047	-0.13474	0.124	0.00071
YBR048W	RPS11B		0.78998	0.06	0.83676	0.032	-0.05286	0.06	0.00012
YBR050C	REG2		0.98151	0.092	1.03883	0.021	-0.0627	0.092	0.00023
YBR051W	YBR051W		1.10565	0.006	1.09018	0.096	0.03393	0.006	1e-05	status=JK
YBR052C	RFS1		1.06164	0.107	1.01084	0.079	0.04764	0.107	0.00028
YBR053C	YBR053C		1.06339	0.043	1.07706	0.068	-0.00269	0.043	0.00053	status=JK
YBR054W	YRO2		0.97006	0.082	0.9405	0.16	0.01855	0.082	0.00017
YBR056W	YBR056W		1.08409	0.111	1.08658	0.05	0.01005	0.111	0.0003
YBR057C	MUM2		0.88282	0.163	1.02744	0.021	-0.14125	0.162	0.00167
YBR058C	UBP14		0.77593	0.095	0.84033	0.033	-0.06263	0.095	0.00049
YBR059C	AKL1		0.7883	0.197	0.93548	0.045	-0.14931	0.197	0.00406
YBR061C	TRM7		0.99247	0.097	1.04348	0.143	-0.0912	0.097	0.00026
YBR061C	TRM7		0.71263	0.119	0.68189	0.069	0.02799	0.119	0.00125
YBR062C	YBR062C		0.97295	0.105	0.97564	0.084	-0.01454	0.105	0.00034
YBR063C	YBR063C		1.07825	0.019	1.03807	0.027	0.04009	0.019	0.0001	status=JK
YBR064W	YBR064W		1.00484	0.094	1.06776	0.069	-0.06243	0.094	0.00023
YBR065C	ECM2		1.10106	0.041	1.10421	0.045	-0.00272	0.041	1e-05
YBR066C	NRG2		1.21083	0.041	0.97939	0.02	0.22932	0.041	0.00039	status=JK
YBR067C	TIP1		1.05007	0.18	1.02907	0.165	0.0262	0.179	0.00134
YBR068C	BAP2		0.99244	0.097	1.03855	0.017	-0.0451	0.097	0.00025
YBR069C	TAT1		1.04937	0.161	0.96534	0.013	0.08773	0.16	0.00097
YBR071W	YBR071W		1.01584	0.035	0.99198	0.062	0.01739	0.035	1e-05
YBR072W	HSP26		0.99385	0.051	1.05478	0.097	-0.06327	0.051	4e-05
YBR073W	RDH54		0.95264	0.034	0.91198	0.031	0.03337	0.034	1e-05
YBR074W	YBR074W		1.02288	0.068	1.00564	0.053	0.01424	0.068	8e-05
YBR075W	YBR075W		1.08474	0.021	0.99125	0.051	0.08401	0.02	0
YBR075W	YBR075W		1.03236	0.041	1.02258	0.014	0.00759	0.041	2e-05
YBR076W	ECM8		1.06005	0.06	0.89379	0.044	0.1699	0.06	0.00106	status=JK
YBR077C	SLM4		1.05486	0.037	1.05976	0.015	-0.00777	0.037	1e-05
YBR078W	ECM33		1.08259	0.019	1.12211	0.089	-0.03148	0.019	0
YBR082C	UBC4		0.64613	0.137	1.02195	0.085	-0.35489	0.137	0.00254
YBR082C	UBC4		0.92875	0.007	1.04998	0.077	-0.12007	0.007	2e-05	status=JK
YBR083W	TEC1		1.19174	0.198	1.11283	0.135	0.11878	0.198	0.00124
YBR084C-A	RPL19A		0.66941	0.149	0.95766	0.067	-0.26171	0.149	0.00291
YBR084W	MIS1		1.01927	0.107	0.99432	0.038	0.02161	0.107	0.00032
YBR085W	AAC3		0.98803	0.066	0.99416	0.071	-0.02273	0.066	8e-05
YBR086C	IST2		0.96355	0.036	0.94045	0.052	0.0263	0.036	1e-05
YBR090C	YBR090C		0.80612	0.138	0.88647	0.131	-0.04483	0.138	0.00136
YBR090C-A	YBR090C-A		1.02691	0.04	0.87018	0.116	0.14981	0.04	0.00052	status=JK
YBR092C	PHO3		0.9605	0.058	0.9772	0.046	-0.02196	0.058	6e-05
YBR093C	PHO5		0.56387	0.148	0.49787	0.088	0.05838	0.148	0.00467
YBR094W	PBY1		1.0116	0.061	0.9857	0.023	0.02295	0.061	6e-05
YBR095C	RXT2		0.29576	0.031	0.40267	0.087	-0.13592	0.031	0.00032
YBR095C	RXT2		0.63702	0.1	0.51035	0.13	0.14518	0.1	0.00103
YBR098W	MMS4		0.93601	0.165	1.03964	0.083	-0.10273	0.165	0.00146
YBR099C	YBR099C		1.019	0.004	0.92822	0.174	0.06463	0.004	0	status=JK
YBR100W	YBR100W		1.00711	0.137	0.99169	0.055	0.02166	0.136	0.00068
YBR101C	FES1		1.09924	0.018	0.99688	0.009	0.10264	0.018	8e-05	status=JK
YBR103W	SIF2		0.57804	0.159	0.6478	0.122	-0.0527	0.159	0.00541
YBR104W	YMC2		0.91369	0.172	0.92665	0.035	-0.03551	0.172	0.00179
YBR105C	VID24		1.12735	0.021	1.05262	0.082	0.08518	0.021	0.00012	status=JK
YBR106W	PHO88		0	0	0.03194	0.037	-0.03101	0	#NUM!
YBR107C	IML3		0.94701	0.129	0.96075	0.081	-0.02156	0.129	0.00069
YBR108W	AIM3		0.93399	0.034	0.83284	0.061	0.09384	0.034	1e-05
YBR111C	YSA1		1.02829	0.05	1.00562	0.063	0.03514	0.05	3e-05
YBR113W	YBR113W		1.08583	0.09	1.03113	0.007	0.05217	0.09	0.00016
YBR114W	RAD16		1.02284	0.064	0.98134	0.088	0.05132	0.064	7e-05
YBR115C	LYS2		0.10207	0.012	0.07799	0.017	0.02775	0.012	0.00046
YBR115C	LYS2		0.38068	0.022	0.11658	0.02	0.25726	0.022	0.00109	status=JK
YBR116C	YBR116C		0.99365	0.143	1.0126	0.113	-0.03458	0.143	0.00081
YBR118W	TEF2		0.88431	0.042	0.71648	0.043	0.16784	0.042	3e-05
YBR119W	MUD1		0.94973	0.079	1.00167	0.123	-0.07402	0.079	0.00016
YBR121C	GRS1		1.01895	0.028	1.00092	0.034	0.00893	0.028	1e-05
YBR122C	MRPL36		1.06046	0.204	0.96008	0.123	0.08968	0.203	0.00189
YBR125C	PTC4		1.16871	0.203	1.09971	0.026	0.07007	0.202	0.0014
YBR126C	TPS1		0.53657	0.077	0.95314	0.176	-0.37447	0.076	0.00078
YBR128C	ATG14		0.9496	0.145	0.97501	0.065	-0.03962	0.145	0.00097
YBR129C	OPY1		0.838	0.176	0.91254	0.051	-0.08663	0.175	0.00244
YBR130C	SHE3		1.10536	0.049	1.05384	0.081	0.04928	0.049	0.00065	status=JK
YBR131W	CCZ1		0.47361	0.092	0.62553	0.104	-0.14896	0.092	0.00198
YBR132C	AGP2		1.10552	0.069	1.08649	0.05	0.01161	0.069	0.00129	status=JK
YBR134W	YBR134W		1.14977	0.106	0.97824	0.053	0.17033	0.106	0.00021
YBR137W	YBR137W		0.68344	0.154	0.57696	0.142	0.13308	0.153	0.00299
YBR138C	YBR138C		1.1822	0.112	1.1822	0.039	-0.008	0.112	0.00023
YBR139W	YBR139W		1.15743	0.124	1.09306	0.058	0.05717	0.124	0.00034
YBR141C	YBR141C		1.01001	0.174	1.06633	0.094	-0.0745	0.174	0.00138
YBR144C	YBR144C		1.06114	0.11	0.93517	0.116	0.1068	0.11	0.00031
YBR145W	ADH5		0.86319	0.208	0.65205	0.021	0.21001	0.208	0.00366
YBR146W	MRPS9		0.87911	0.127	0.98688	0.065	-0.09218	0.127	0.00082
YBR147W	RTC2		1.01501	0.055	1.04581	0.088	-0.05834	0.055	4e-05
YBR148W	YSW1		1.13791	0.044	1.03999	0.014	0.09344	0.044	2e-05
YBR149W	ARA1		1.00342	0.105	1.00688	0.06	0.00947	0.104	0.00031
YBR150C	TBS1		1.03445	0.002	0.98351	0.014	0.05508	0.002	0	status=JK
YBR151W	APD1		0.70799	0.053	0.88681	0.011	-0.17917	0.053	0.00011
YBR156C	SLI15		0.94972	0.124	0.95982	0.041	-0.01728	0.124	0.0006
YBR157C	ICS2		0.98288	0.188	1.01953	0.032	-0.04583	0.187	0.00186
YBR158W	AMN1		0.92537	0.067	0.95665	0.078	-0.03524	0.067	0.0001
YBR159W	IFA38		1.09288	0.076	1.04646	0.045	0.04259	0.076	9e-05
YBR161W	CSH1		1.09823	0.041	1.01269	0.011	0.08335	0.041	1e-05
YBR162C	TOS1		1.07533	0.046	1.05572	0.04	0.00792	0.046	2e-05
YBR162W-A	YSY6		0.93369	0.116	1.01311	0.023	-0.08157	0.116	0.00053
YBR164C	ARL1		0.9463	0.116	1.01374	0.038	-0.07724	0.115	0.00049
YBR165W	UBS1		0.86854	0.061	1.00668	0.036	-0.14133	0.061	9e-05
YBR165W	UBS1		1.06155	0.024	1.0615	0.027	-0.00675	0.024	0
YBR166C	TYR1		1.00752	0.129	0.97354	0.15	0.01805	0.129	0.00057
YBR168W	PEX32		1.12238	0.115	1.00788	0.137	0.13303	0.115	0.00029
YBR169C	SSE2		0.83738	0.14	0.83545	0.02	0.00984	0.14	0.00126
YBR170C	NPL4		0.37839	0.054	0.28416	0.037	0.10753	0.054	0.00078
YBR171W	SEC66		0.83735	0.117	0.927	0.018	-0.08692	0.117	0.00074
YBR172C	SMY2		0.93391	0.099	0.9043	0.074	0.03834	0.099	0.00033
YBR174C	YBR174C		0.95799	0.046	1.03188	0.003	-0.07854	0.046	3e-05
YBR175W	SWD3		0.91926	0.02	0.93362	0.025	-0.02239	0.02	0.00015	status=JK
YBR176W	ECM31		1.05051	0.053	0.92915	0.093	0.07879	0.052	0.00083	status=JK
YBR177C	EHT1		1.02859	0.137	0.96255	0.075	0.04658	0.136	0.00063
YBR178W	YBR178W		1.09707	0.146	1.11304	0.07	-0.00477	0.146	0.00064
YBR180W	DTR1		0.64965	0.213	0.86355	0.038	-0.21661	0.212	0.00882
YBR181C	RPS6B		0.44348	0.127	0.53331	0.175	-0.10652	0.127	0.00606
YBR182C	SMP1		1.02138	0.108	1.03448	0.03	-0.00146	0.108	0.00032
YBR183W	YPC1		0.93119	0.098	1.01811	0.09	-0.10764	0.098	0.00032
YBR184W	YBR184W		1.0483	0.017	1.04043	0.09	0.01789	0.017	9e-05	status=JK
YBR185C	MBA1		0.89516	0.117	0.85936	0.053	0.03624	0.117	0.0006
YBR186W	PCH2		1.01204	0.1	1.00268	0.073	0.00556	0.099	0.00026
YBR187W	GDT1		0.95339	0.098	1.03523	0.062	-0.08536	0.098	0.00029
YBR188C	NTC20		1.07514	0.068	1.07714	0.081	0.01266	0.068	7e-05
YBR189W	RPS9B		0.13685	0.065	0.20197	0.014	-0.06473	0.064	0.024
YBR194W	AIM4		0.3525	0.092	0.4385	0.014	-0.08121	0.091	0.00456
YBR195C	MSI1		1.04808	0.027	1.0701	0.023	-0.03052	0.027	0.00022	status=JK
YBR197C	YBR197C		1.18024	0.095	1.03471	0.022	0.14854	0.095	0.00014
YBR199W	KTR4		1.04128	0.083	1.11426	0.03	-0.08806	0.083	0.0021	status=JK
YBR200W	BEM1		0.53338	0.38	0.74797	0.131	-0.25247	0.379	0.06743
YBR201W	DER1		0.81946	0.098	0.80809	0.039	0.01162	0.098	0.00046
YBR203W	COS111		1.04343	0.039	1.06439	0.001	-0.02468	0.039	1e-05
YBR204C	LDH1		0.95726	0.186	1.08814	0.113	-0.12487	0.185	0.00194
YBR205W	KTR3		0.99288	0.06	1.05756	0.045	-0.07087	0.06	6e-05
YBR206W	YBR206W		1.01794	0.035	1.03008	0.088	-0.00129	0.035	1e-05
YBR207W	FTH1		1.15788	0.124	1.06584	0.109	0.09505	0.124	0.00034
YBR208C	DUR1		1.07411	0.086	1.07008	0.072	0.00594	0.086	0.00014
YBR209W	YBR209W		1.10142	0.15	1.17896	0.136	-0.09332	0.15	0.00068
YBR210W	ERV15		1.11319	0.087	1.0123	0.051	0.09026	0.087	0.00013
YBR212W	NGR1		1.07944	0.126	0.93868	0.069	0.1601	0.126	0.00043
YBR213W	MET8		1.04054	0.17	1.01421	0.005	0.02058	0.169	0.00116
YBR214W	SDS24		0.94163	0.059	1.01135	0.094	-0.06123	0.059	7e-05
YBR215W	HPC2		1.33239	0.058	1.28297	0.058	0.05801	0.058	2e-05
YBR216C	YBP1		0.99216	0.034	0.99467	0.076	-0.00804	0.034	1e-05
YBR217W	ATG12		1.0327	0.073	1.02879	0.071	-0.00641	0.073	0.0001
YBR218C	PYC2		1.05643	0.057	0.97123	0.089	0.08372	0.057	4e-05
YBR219C	YBR219C		0.80697	0.084	0.96879	0.036	-0.15572	0.084	0.00031
YBR220C	YBR220C		0.95228	0.075	0.98755	0.141	-0.06448	0.075	0.00014
YBR221C	PDB1		0.73788	0.187	0.7313	0.075	0.0201	0.187	0.00424
YBR222C	PCS60		0.98784	0.107	1.02542	0.079	-0.03555	0.106	0.00034
YBR223C	TDP1		1.03056	0.029	1.04849	0.046	-0.02407	0.029	1e-05
YBR224W	YBR224W		0.75091	0.215	1.08953	0.025	-0.34342	0.214	0.006
YBR225W	YBR225W		0.99062	0.043	1.04011	0.077	-0.05667	0.043	2e-05
YBR226C	YBR226C		1.05489	0.021	0.95048	0.024	0.08787	0.021	0
YBR227C	MCX1		0.95426	0.013	1.01964	0.07	-0.06675	0.013	7e-05	status=JK
YBR228W	SLX1		1.03194	0.029	1.05337	0.044	-0.02051	0.029	0.00026	status=JK
YBR229C	ROT2		1.00104	0.038	1.06412	0.085	-0.08451	0.038	2e-05
YBR230C	OM14		0.9413	0.032	1.02639	0.042	-0.08731	0.032	1e-05
YBR231C	SWC5		0.44422	0.121	0.53653	0.091	-0.09503	0.121	0.00524
YBR232C	YBR232C		1.10764	0.021	1.0213	0.069	0.06744	0.021	0.00012	status=JK
YBR233W	PBP2		1.00514	0.025	0.97842	0.005	0.02564	0.025	0
YBR235W	VHC1		0.97	0.042	0.98712	0.044	-0.01651	0.042	2e-05
YBR238C	YBR238C		0.67228	0.085	0.82888	0.081	-0.15731	0.085	0.00054
YBR239C	ERT1		1.03975	0.061	1.01065	0.076	0.01038	0.061	6e-05
YBR240C	THI2		1.07367	0.064	1.06866	0.1	0.02064	0.064	6e-05
YBR241C	YBR241C		0.98867	0.002	1.04695	0.072	-0.04319	0.002	0	status=JK
YBR242W	YBR242W		1.03356	0.019	1.02271	0.017	0.0122	0.019	0
YBR244W	GPX2		1.05854	0.05	1.07813	0.061	-0.02266	0.05	3e-05
YBR245C	ISW1		1.03269	0.08	1.12791	0.079	-0.0959	0.08	0.00013
YBR246W	RRT2		0.96308	0.002	0.97789	0.024	-0.02643	0.002	0	status=JK
YBR248C	HIS7		0.2818	0.018	0.21899	0.039	0.05306	0.018	7e-05
YBR249C	ARO4		0.96221	0.005	0.94668	0.023	0.00601	0.005	1e-05	status=JK
YBR250W	SPO23		1.00583	0.024	1.04842	0.052	-0.05831	0.024	0
YBR255W	MTC4		0.9389	0.015	1.03693	0.059	-0.11168	0.015	8e-05	status=JK
YBR258C	SHG1		1.04488	0.045	1.06016	0.039	-0.00936	0.045	2e-05
YBR259W	YBR259W		0.9788	0.022	1.04922	0.014	-0.07625	0.022	0.00016	status=JK
YBR260C	RGD1		1.02104	0.054	1.05067	0.005	-0.03516	0.054	4e-05
YBR261C	TAE1		1.02408	0.041	1.02	0.039	-0.01339	0.04	0.00052	status=JK
YBR262C	AIM5		0.87922	0.137	1.0159	0.088	-0.12442	0.137	0.00102
YBR263W	SHM1		1.02873	0.09	0.96841	0.025	0.05351	0.09	0.00018
YBR264C	YPT10		1.00405	0.106	1.01711	0.06	-0.02709	0.106	0.00032
YBR266C	YBR266C		0.53946	0.12	0.67276	0.044	-0.1255	0.12	0.00291
YBR267W	REI1		0.40991	0.01	0.53333	0.11	-0.13757	0.01	0.00018	status=JK
YBR269C	FMP21		1.0717	0.018	0.96494	0.045	0.1152	0.018	9e-05	status=JK
YBR270C	BIT2		0.95762	0.081	0.91816	0.197	0.0027	0.08	0.00016
YBR271W	EFM2		0.984	0.058	1.00489	0.073	-0.01929	0.058	6e-05
YBR272C	HSM3		1.00344	0.029	1.00634	0.06	-0.01439	0.029	1e-05
YBR273C	UBX7		1.04629	0.043	1.09594	0.062	-0.05501	0.043	2e-05
YBR274W	CHK1		0.98071	0.065	0.99078	0.029	-0.01368	0.065	8e-05
YBR275C	RIF1		0.95778	0.058	0.93345	0.108	-0.00449	0.058	6e-05
YBR276C	PPS1		1.00911	0.009	0.93156	0.117	0.08743	0.009	2e-05	status=JK
YBR277C	YBR277C		0.98224	0.005	0.9037	0.006	0.07281	0.005	1e-05	status=JK
YBR278W	DPB3		0.92781	0.091	0.89524	0.03	0.02281	0.091	0.00026
YBR280C	SAF1		1.03602	0.095	1.04579	0.09	-0.02371	0.095	0.00021
YBR281C	DUG2		0.97642	0.048	0.97793	0.048	0.00278	0.048	3e-05
YBR283C	SSH1		0.86346	0.161	0.85967	0.02	0.00729	0.161	0.00174
YBR284W	YBR284W		0.94427	0.037	0.89049	0.024	0.05493	0.037	2e-05
YBR285W	YBR285W		1.02256	0.006	1.0109	0.046	-0.00287	0.006	1e-05	status=JK
YBR286W	APE3		0.96595	0.031	0.95166	0.009	0.01029	0.031	1e-05
YBR287W	YBR287W		0.92454	0.032	0.93834	0.071	-0.0226	0.032	1e-05
YBR288C	APM3		0.87907	0.015	0.89889	0.02	-0.02036	0.015	9e-05	status=JK
YBR289W	SNF5		0.50724	0.15	0.49282	0.056	0.01106	0.15	0.00664
YBR290W	BSD2		0.97422	0.033	1.03426	0.079	-0.04472	0.033	0.00039	status=JK
YBR291C	CTP1		0.84519	0.087	0.95456	0.056	-0.11966	0.087	0.0003
YBR292C	YBR292C		0.977	0.093	0.95972	0.081	0.01493	0.093	0.00023
YBR293W	VBA2		0.95343	0.033	0.90975	0.019	0.03703	0.033	0.00041	status=JK
YBR294W	SUL1		0	0	0.02118	0.037	0	0	#NUM!	status=JK
YBR295W	PCA1		0.96852	0.013	0.97517	0.027	-0.00383	0.013	0
YBR296C	PHO89		1.02736	0.032	1.00338	0.023	0.01731	0.032	1e-05
YBR297W	MAL33		0.95137	0.057	0.94276	0.031	0.00329	0.057	6e-05
YBR298C	MAL31		0.93138	0.058	0.98015	0.031	-0.05071	0.058	7e-05
YBR299W	MAL32		1.01151	0.053	0.9705	0.026	0.0483	0.053	4e-05
YBR300C	YBR300C		1.02162	0.067	1.01506	0.026	0.0022	0.067	8e-05
YBR301W	PAU24		0.99443	0.084	1.03364	0.083	-0.04195	0.083	0.00016
YCL001W	RER1		1.10417	0.031	1.05402	0.008	0.04232	0.031	1e-05
YCL001W-A	YCL001W-A		1.09637	0.04	1.01363	0.089	0.09813	0.04	0.00044	status=JK
YCL002C	YCL002C		1.0352	0.113	1.0753	0.166	-0.03407	0.113	0.00035
YCL006C	YCL006C		1.02857	0.036	0.98882	0.087	0.02181	0.036	1e-05
YCL009C	ILV6		1.01679	0.015	1.0685	0.074	-0.03638	0.015	0
YCL010C	SGF29		0.88114	0.033	0.79719	0.015	0.07551	0.033	1e-05
YCL011C	GBP2		1.0316	0.025	1.03733	0.068	-0.00767	0.025	0
YCL012W	YCL012W		1.0262	0.015	1.00665	0.054	0.02775	0.015	7e-05	status=JK
YCL013W	YCL013W		0.9454	0.063	0.82464	0.072	0.11769	0.063	0.0015	status=JK
YCL014W	BUD3		1.06428	0.017	0.93262	0.094	0.13816	0.017	0
YCL016C	DCC1		0.89424	0.22	0.8889	0.073	0.00235	0.22	0.00388
YCL022C	YCL022C		0.99079	0.044	0.93136	0.229	-0.00489	0.044	0.00065	status=JK
YCL023C	YCL023C		1.06882	0.088	0.97395	0.088	0.10131	0.088	0.00225	status=JK
YCL024W	KCC4		1.00482	0.132	0.9652	0.027	0.03718	0.132	0.00061
YCL025C	AGP1		0.87833	0.149	0.99763	0.012	-0.12457	0.149	0.00132
YCL026C	YCL026C		1.04607	0.066	0.99303	0.054	0.06181	0.066	7e-05
YCL026C-A	FRM2		0.99272	0.155	1.02814	0.024	-0.02847	0.155	0.00103
YCL027W	FUS1		1.07541	0.047	0.95389	0.072	0.10318	0.047	2e-05
YCL028W	RNQ1		1.05635	0.012	1.05944	0.071	0.00044	0.012	0
YCL029C	BIK1		0.96342	0.006	0.90916	0.04	0.05232	0.006	1e-05	status=JK
YCL030C	HIS4		0.35827	0.068	0.28309	0.029	0.07984	0.068	0.00185
YCL032W	STE50		0.89938	0.046	0.60138	0.047	0.30654	0.046	4e-05
YCL033C	MXR2		0.98263	0.157	1.03715	0.004	-0.05518	0.157	0.0011
YCL034W	LSB5		1.05671	0.072	0.97363	0.038	0.07989	0.072	9e-05
YCL035C	GRX1		1.06951	0.01	1.03618	0.003	0.03155	0.01	3e-05	status=JK
YCL036W	GFD2		1.03388	0.02	0.9982	0.024	0.03031	0.02	0.00012	status=JK
YCL037C	SRO9		0.78732	0.047	0.79236	0.119	-0.00422	0.047	0.0012	status=JK
YCL038C	ATG22		0.99879	0.06	1.03802	0.088	-0.03012	0.06	6e-05
YCL039W	GID7		0.98602	0.054	1.02213	0.041	-0.03032	0.054	5e-05
YCL040W	GLK1		1.06492	0.037	1.01562	0.031	0.05327	0.037	1e-05
YCL042W	YCL042W		1.05109	0.03	1.03093	0.029	0.01429	0.03	1e-05
YCL044C	MGR1		0.92559	0.084	0.83998	0.052	0.10011	0.084	0.0002
YCL045C	EMC1		1.06765	0.121	1.05002	0.078	0.01961	0.121	0.0004
YCL046W	YCL046W		1.05185	0.078	0.99498	0.009	0.05824	0.078	0.00011
YCL047C	POF1		0.95679	0.136	1.00284	0.054	-0.05895	0.136	0.00078
YCL048W	SPS22		0.95444	0.087	0.96431	0.058	-0.01873	0.086	0.0002
YCL049C	YCL049C		0.98634	0.045	0.95879	0.059	0.01468	0.045	3e-05
YCL050C	APA1		1.08317	0.022	0.97884	0.052	0.09804	0.022	0.00014	status=JK
YCL051W	LRE1		1.06416	0.046	1.00838	0.005	0.05411	0.046	2e-05
YCL055W	KAR4		0.96052	0.021	0.98572	0.025	-0.03069	0.021	0
YCL056C	PEX34		0.96803	0.024	0.989	0.026	-0.02092	0.024	0
YCL057W	PRD1		1.04497	0.029	1.0767	0.051	-0.03232	0.029	1e-05
YCL060C	YCL060C		0.92043	0.067	0.91075	0.094	-0.02149	0.067	0.00011
YCL061C	MRC1		1.04729	0.176	1.00355	0.1	0.05276	0.175	0.00127
YCL062W	YCL062W		0.72643	0.159	0.98938	0.028	-0.26339	0.158	0.00275
YCL063W	VAC17		0.90467	0.097	0.97077	0.029	-0.07125	0.096	0.00033
YCL064C	CHA1		1.02582	0.044	1.06838	0.073	-0.0214	0.044	2e-05
YCL069W	VBA3		1.03136	0.092	1.04466	0.099	0.00753	0.092	0.00019
YCL074W	YCL074W		0.97065	0.103	0.89684	0.16	0.12159	0.103	0.00033
YCL075W	YCL075W		0.99595	0.064	0.99953	0.032	-0.01607	0.064	7e-05
YCL076W	YCL076W		0.95412	0.005	0.97968	0.082	-0.02803	0.005	1e-05	status=JK
YCR001W	YCR001W		1.0994	0.02	1.09486	0.023	0.00083	0.02	0
YCR005C	CIT2		1.04478	0.021	1.04543	0.045	-0.00637	0.021	0.00014	status=JK
YCR006C	YCR006C		1.02058	0.008	0.96567	0.024	0.05654	0.008	2e-05	status=JK
YCR007C	YCR007C		1.13555	0.102	1.12036	0.008	0.01443	0.102	0.0002
YCR008W	SAT4		1.08194	0.064	1.04892	0.039	0.03199	0.064	6e-05
YCR009C	RVS161		0.69304	0.047	0.9052	0.021	-0.21395	0.047	8e-05
YCR010C	ADY2		1.02383	0.057	1.03194	0.081	-0.01878	0.057	5e-05
YCR011C	ADP1		1.08057	0.075	1.06182	0.039	0.0146	0.075	9e-05
YCR014C	POL4		1.11015	0.044	1.17833	0.012	-0.06746	0.044	2e-05
YCR015C	YCR015C		1.03503	0.021	1.00889	0.017	0.01494	0.021	0
YCR016W	YCR016W		1.03569	0.064	1.0458	0.016	-0.02128	0.064	7e-05
YCR017C	CWH43		1.06181	0.019	1.05574	0.022	0.00066	0.019	0
YCR019W	MAK32		0.99072	0.052	0.95855	0.036	0.02482	0.052	4e-05
YCR020C	PET18		1.01416	0.042	1.10919	0.013	-0.09998	0.042	2e-05
YCR020C-A	MAK31		1.08175	0.034	1.11264	0.036	-0.03631	0.034	1e-05
YCR021C	HSP30		1.13552	0.024	1.08146	0.055	0.06414	0.024	0
YCR022C	YCR022C		1.1128	0.007	1.06094	0.071	0.03381	0.007	1e-05	status=JK
YCR023C	YCR023C		1.07447	0.015	1.07415	0.004	-0.00132	0.015	6e-05	status=JK
YCR024C-A	PMP1		1.01717	0.061	0.95922	0.019	0.055	0.061	6e-05
YCR025C	YCR025C		1.05972	0.033	1.0335	0.041	0.02036	0.033	1e-05
YCR026C	NPP1		1.0481	0.037	1.08693	0.06	-0.03793	0.037	1e-05
YCR027C	RHB1		1.01925	0.039	1.07334	0.104	-0.06569	0.039	2e-05
YCR028C-A	RIM1		0.92855	0.031	0.90956	0.074	0.00869	0.03	1e-05
YCR030C	SYP1		0.99501	0.024	0.99203	0.056	-0.00144	0.024	0
YCR031C	RPS14A		1.02343	0.003	0.98839	0.091	0.05244	0.003	0	status=JK
YCR032W	BPH1		1.02901	0.049	0.94272	0.143	0.07131	0.049	0.00075	status=JK
YCR033W	SNT1		0.58134	0.025	0.62861	0.039	-0.04382	0.025	2e-05
YCR034W	FEN1		0.78233	0.082	0.90879	0.086	-0.13996	0.082	0.00032
YCR036W	RBK1		1.05741	0.042	1.0171	0.064	0.03998	0.042	2e-05
YCR037C	PHO87		1.11494	0.001	1.08908	0.046	0.01603	0.001	0	status=JK
YCR043C	YCR043C		1.08193	0.024	1.18104	0.025	-0.11355	0.024	0
YCR044C	PER1		1.02548	0.016	1.03249	0.046	-0.0188	0.016	8e-05	status=JK
YCR045C	RRT12		1.04649	0.014	1.00423	0.055	0.04722	0.014	0
YCR048W	ARE1		1.05623	0.032	1.04126	0.013	0.00787	0.032	1e-05
YCR049C	YCR049C		1.06371	0.032	1.03817	0.037	0.02957	0.032	1e-05
YCR050C	YCR050C		1.0654	0.04	1.03581	0.032	0.01963	0.04	0.00048	status=JK
YCR051W	YCR051W		1.00417	0.166	1.08697	0.042	-0.09646	0.166	0.00122
YCR053W	THR4		0.2515	0.051	0.24879	0.031	-0.00727	0.051	0.00219
YCR059C	YIH1		0.88072	0.112	0.96074	0.06	-0.09761	0.112	0.00056
YCR060W	TAH1		0.88306	0.11	1.05736	0.11	-0.19203	0.11	0.00053
YCR061W	YCR061W		0.95004	0.006	0.9319	0.016	0.01996	0.006	1e-05	status=JK
YCR062W	YCR062W		0.96854	0.097	0.98578	0.099	-0.01636	0.097	0.00027
YCR063W	BUD31		0.1114	0.129	0.56512	0.083	-0.4595	0.129	0.18208
YCR065W	HCM1		0.9491	0.004	0.97581	0.029	-0.03055	0.004	1e-05	status=JK
YCR067C	SED4		1.0167	0.062	1.07782	0.029	-0.07168	0.062	6e-05
YCR068W	ATG15		0.99296	0.006	0.9868	0.002	0.00249	0.006	0
YCR069W	CPR4		1.07905	0.023	1.06727	0.005	0.00662	0.023	0.00015	status=JK
YCR071C	IMG2		0.59594	0.099	0.63516	0.072	-0.03996	0.099	0.00124
YCR073C	SSK22		1.03552	0.078	1.0319	0.029	-0.00737	0.078	0.00012
YCR073W-A	SOL2		1.05533	0.05	1.03352	0.071	0.01646	0.05	3e-05
YCR075C	ERS1		1.06071	0.115	1.07617	0.102	-0.04096	0.115	0.00035
YCR076C	FUB1		1.12889	0.038	1.15708	0.013	-0.03595	0.038	1e-05
YCR077C	PAT1		0.98167	0.022	1.01923	0.095	-0.02723	0.022	0.00017	status=JK
YCR079W	PTC6		1.03017	0.098	1.19792	0.017	-0.16225	0.098	0.00024
YCR081W	SRB8		0.59188	0.073	0.71552	0.043	-0.11627	0.073	0.00051
YCR082W	AHC2		1.04045	0.052	1.0363	0.069	-0.00377	0.052	3e-05
YCR083W	TRX3		1.09806	0.043	1.0584	0.038	0.0374	0.043	2e-05
YCR085W	YCR085W		1.02613	0.03	1.05751	0.058	-0.05329	0.03	1e-05
YCR086W	CSM1		1.08766	0.019	0.99201	0.056	0.08356	0.019	0.0001	status=JK
YCR087C-A	YCR087C-A		1.0202	0.052	0.97643	0.044	0.03882	0.052	4e-05
YCR087W	YCR087W		1.01386	0.117	0.99672	0.077	0.03765	0.117	0.00042
YCR088W	ABP1		0.9768	0.048	1.04409	0.081	-0.06197	0.048	3e-05
YCR089W	FIG2		1.00932	0.042	1.01609	0.034	-0.00465	0.042	2e-05
YCR090C	YCR090C		1.03369	0.049	0.94549	0.067	0.10209	0.049	3e-05
YCR091W	KIN82		0.98091	0.07	1.04992	0.01	-0.07564	0.07	0.0001
YCR092C	MSH3		1.05893	0.023	1.08013	0.067	-0.03346	0.023	0
YCR095C	OCA4		1.09456	0.037	1.05047	0.074	0.03179	0.036	1e-05
YCR098C	GIT1		1.03232	0.021	1.04652	0.049	-0.02613	0.021	0
YCR099C	YCR099C		0.99806	0.048	0.98807	0.07	0.00863	0.047	3e-05
YCR100C	YCR100C		1.07637	0.11	1.15829	0.124	-0.07068	0.11	0.00029
YCR101C	YCR101C		0.97052	0.127	1.0556	0.017	-0.0871	0.127	0.00061
YCR102C	YCR102C		0.99206	0.078	1.04474	0.072	-0.04725	0.078	0.00013
YCR102W-A	YCR102W-A		1.03693	0.034	1.07902	0.053	-0.04595	0.034	1e-05
YCR105W	ADH7		0.83749	0.031	0.85305	0.043	-0.02005	0.031	1e-05
YCR106W	RDS1		1.08692	0.101	0.9941	0.024	0.09058	0.101	0.00022
YCR107W	AAD3		1.06076	0.014	1.05468	0.017	0.0005	0.014	6e-05	status=JK
YDL001W	RMD1		0.94542	0.049	0.94674	0.094	0.02752	0.049	0.0009	status=JK
YDL002C	NHP10		0.8873	0.021	0.95073	0.019	-0.06769	0.021	0
YDL006W	PTC1		0.92877	0.031	0.85873	0.005	0.06626	0.031	0.00038	status=JK
YDL010W	GRX6		1.06749	0.061	1.16918	0.061	-0.09013	0.061	5e-05
YDL011C	YDL011C		1.12316	0.014	1.08699	0.054	0.02823	0.014	0
YDL012C	YDL012C		1.08023	0.051	1.05385	0.129	0.02705	0.051	3e-05
YDL013W	SLX5		0.28857	0.062	0.298	0.058	-0.01463	0.062	0.0026
YDL018C	ERP3		0.85408	0.142	1.11646	0.013	-0.26976	0.142	0.00123
YDL019C	OSH2		1.04096	0.113	1.05237	0.01	-0.01905	0.113	0.00035
YDL020C	RPN4		0.82597	0.008	0.81506	0.033	0.01531	0.008	3e-05	status=JK
YDL023C	YDL023C		1.04285	0.015	0.96377	0.01	0.07916	0.015	0
YDL024C	DIA3		1.00673	0.009	1.00997	0.024	-0.00551	0.009	3e-05	status=JK
YDL025C	RTK1		1.06768	0.012	1.04618	0.088	-0.00183	0.012	4e-05	status=JK
YDL026W	YDL026W		1.0478	0.039	1.02434	0.006	0.02175	0.039	1e-05
YDL027C	YDL027C		0.98912	0.089	0.99014	0.081	-0.0069	0.089	0.0002
YDL033C	SLM3		0.62878	0.14	0.67328	0.101	-0.03607	0.14	0.00293
YDL034W	YDL034W		1.00807	0.132	1.0315	0.184	-0.02434	0.131	0.0006
YDL035C	GPR1		0.97135	0.012	1.10037	0.073	-0.13741	0.012	5e-05	status=JK
YDL036C	PUS9		1.07835	0.086	1.0703	0.052	-0.00348	0.086	0.00014
YDL037C	BSC1		1.05469	0.02	1.01804	0.071	0.01592	0.02	0.00012	status=JK
YDL038C	YDL038C		1.0736	0.069	1.05943	0.052	0.00906	0.069	7e-05
YDL039C	PRM7		1.05056	0.022	1.15047	0.097	-0.07904	0.022	0
YDL040C	NAT1		1.03102	0.028	1.04614	0.032	-0.01625	0.028	1e-05
YDL041W	YDL041W		0	0	0	0	0	0	#NUM!	status=JK
YDL042C	SIR2		0	0	0	0	0	0	#NUM!
YDL046W	NPC2		1.00844	0.045	1.02528	0.08	-0.04043	0.045	2e-05
YDL048C	STP4		0.97985	0.074	1.04017	0.096	-0.04577	0.074	0.00012
YDL050C	YDL050C		1.00475	0.027	0.95004	0.026	0.04249	0.027	1e-05
YDL051W	LHP1		0.99979	0.024	0.9573	0.037	0.03306	0.024	0.00019	status=JK
YDL052C	SLC1		1.10126	0.026	0.98597	0.092	0.12786	0.026	0.00019	status=JK
YDL053C	PBP4		0.98531	0.047	0.99418	0.094	-0.01257	0.047	0.00076	status=JK
YDL054C	MCH1		1.01547	0.029	0.98038	0.034	0.02685	0.029	1e-05
YDL056W	MBP1		1.07511	0.011	1.12634	0.01	-0.05571	0.011	4e-05	status=JK
YDL059C	RAD59		1.06568	0.016	1.08931	0.043	-0.0254	0.016	0
YDL061C	RPS29B		0.69147	0.027	0.65703	0.005	0.03038	0.027	0.00052	status=JK
YDL062W	YDL062W		0.89075	0.044	0.95409	0.079	-0.06575	0.044	3e-05
YDL065C	PEX19		1.0477	0.049	0.95777	0.013	0.08547	0.049	3e-05
YDL066W	IDP1		1.04048	0.013	1.07197	0.148	-0.06269	0.013	5e-05	status=JK
YDL070W	BDF2		0.98434	0.136	1.01604	0.035	-0.04264	0.136	0.00072
YDL071C	YDL071C		0.84372	0.146	0.85998	0.174	-0.05646	0.146	0.0014
YDL074C	BRE1		0.58147	0.215	0.42179	0.005	0.15785	0.215	0.01243
YDL074C	BRE1		0.60598	0.175	0.59068	0.124	-0.01092	0.175	0.00618
YDL076C	RXT3		0.90311	0.092	0.95179	0.034	-0.06309	0.092	0.00029
YDL077C	VAM6		0.58985	0.032	0.77173	0.034	-0.16446	0.032	4e-05
YDL078C	MDH3		0.92715	0.114	0.68488	0.184	0.23283	0.114	0.00051
YDL079C	MRK1		1.03559	0.031	1.02639	0.085	0.01047	0.031	1e-05
YDL080C	THI3		0.76156	0.121	1.01591	0.012	-0.26294	0.121	0.00107
YDL081C	RPP1A		0.63044	0.027	0.75607	0.102	-0.11268	0.027	0.0006	status=JK
YDL082W	RPL13A		0.69867	0.072	0.87563	0.067	-0.17795	0.072	0.0003
YDL083C	RPS16B		0.66901	0.072	0.77516	0.015	-0.10119	0.072	0.00034
YDL085W	NDE2		1.02047	0.115	1.09946	0.056	-0.07354	0.115	0.00039
YDL086W	YDL086W		1.08944	0.077	0.9775	0.014	0.11645	0.077	0.0001
YDL088C	ASM4		0.90059	0.012	0.99366	0.061	-0.10596	0.012	6e-05	status=JK
YDL089W	NUR1		0.97453	0.01	0.96885	0.04	0.00287	0.01	0
YDL090C	RAM1		0	0	0	0	0	0	#NUM!
YDL091C	UBX3		1.04977	0.034	1.02762	0.115	-0.00921	0.034	1e-05
YDL093W	PMT5		1.05543	0.04	1.01505	0.047	0.02151	0.04	0.00047	status=JK
YDL094C	YDL094C		0.97945	0.034	0.97998	0.07	0.01175	0.034	1e-05
YDL095W	PMT1		0.98421	0.063	0.96998	0.05	0.00981	0.063	7e-05
YDL096C	YDL096C		0.93777	0.004	1.04628	0.074	-0.11907	0.004	1e-05	status=JK
YDL099W	BUG1		1.08163	0.044	1.04969	0.072	0.02601	0.044	2e-05
YDL100C	GET3		0.92353	0.015	0.93438	0.02	-0.01237	0.015	9e-05	status=JK
YDL104C	QRI7		0.91914	0.06	0.89417	0.06	0.01593	0.06	8e-05
YDL106C	PHO2		1.01693	0.111	1.07709	0.045	-0.05118	0.111	0.00035
YDL109C	YDL109C		0.95999	0.008	1.00538	0.05	-0.05333	0.008	2e-05	status=JK
YDL110C	TMA17		0.928	0.045	0.93011	0.042	-0.00512	0.045	3e-05
YDL112W	TRM3		0.96914	0.04	0.87487	0.132	0.08582	0.04	0.00056	status=JK
YDL113C	ATG20		0.97592	0.014	0.87931	0.145	0.06751	0.014	0
YDL114W	YDL114W		1.00713	0.033	1.01116	0	-0.00713	0.033	1e-05
YDL117W	CYK3		0.80299	0.047	0.87524	0.067	-0.08648	0.047	5e-05
YDL118W	YDL118W		0.95648	0.017	0.94538	0.057	0.00571	0.017	0
YDL119C	YDL119C		0.92283	0.061	0.92817	0.021	-0.00314	0.061	8e-05
YDL121C	YDL121C		0.87212	0.154	0.9206	0.078	-0.04703	0.153	0.00147
YDL122W	UBP1		1.01726	0.068	0.98696	0.123	0.00082	0.068	8e-05
YDL123W	SNA4		1.12087	0.016	1.07743	0.104	0.03455	0.015	6e-05	status=JK
YDL124W	YDL124W		1.07532	0.012	1.03089	0.052	0.04512	0.012	0
YDL125C	HNT1		0.99576	0.024	1.0686	0.047	-0.07592	0.024	0.0002	status=JK
YDL127W	PCL2		0.97012	0.128	1.00684	0.046	-0.02648	0.128	0.00063
YDL128W	VCX1		0.92809	0.06	1.00008	0.029	-0.08004	0.06	7e-05
YDL129W	YDL129W		0.98254	0.098	0.93758	0.076	0.02836	0.098	0.00028
YDL130W	RPP1B		0.97724	0.004	1.01857	0.047	-0.0499	0.004	1e-05	status=JK
YDL130W-A	STF1		1.09329	0.01	1.09271	0.035	0.00686	0.01	3e-05	status=JK
YDL131W	LYS21		1.01853	0.035	0.97595	0.132	-0.00162	0.035	0.00039	status=JK
YDL133C-A	RPL41B		0.98069	0.063	0.98525	0.079	-0.01748	0.063	7e-05
YDL133W	SRF1		0.88322	0.024	1.05096	0.061	-0.16291	0.024	1e-05
YDL134C	PPH21		1.07042	0.022	1.06552	0.141	0.01327	0.022	0
YDL134C-A	YDL134C-A		1.03381	0.042	1.01785	0.022	0.0185	0.041	2e-05
YDL135C	RDI1		0.98549	0.017	1.00385	0.09	-0.02738	0.017	9e-05	status=JK
YDL136W	RPL35B		0.8836	0.068	0.76148	0.2	0.17768	0.068	0.00012
YDL137W	ARF2		1.00795	0.026	0.97549	0.12	0.00579	0.026	0
YDL138W	RGT2		1.04271	0.031	1.08986	0.059	-0.03625	0.031	1e-05
YDL142C	CRD1		0.87623	0.048	0.83774	0.032	0.03039	0.048	5e-05
YDL144C	YDL144C		1.01175	0.051	0.99367	0.045	0.01242	0.051	4e-05
YDL146W	LDB17		1.02391	0.047	1.02096	0.058	-0.006	0.047	3e-05
YDL149W	ATG9		0.98585	0.063	0.90807	0.011	0.07724	0.063	7e-05
YDL154W	MSH5		1.03811	0.065	1.0553	0.034	-0.00409	0.064	7e-05
YDL155W	CLB3		1.09812	0.013	0.99807	0.053	0.08284	0.013	4e-05	status=JK
YDL156W	CMR1		0.96457	0.062	0.97949	0.042	-0.02004	0.062	7e-05
YDL157C	YDL157C		0.94336	0.062	0.92155	0.003	0.0179	0.062	8e-05
YDL159W	STE7		0	0	0	0	0	0	#NUM!
YDL160C	DHH1		0.00074	0	0	0	0.00074	0	8e-05	status=JK
YDL161W	ENT1		0.98761	0.047	0.97885	0.004	0.00486	0.047	3e-05
YDL162C	YDL162C		1.01605	0.025	1.08588	0.02	-0.06902	0.025	0
YDL167C	NRP1		1.00157	0.037	0.97314	0.034	0.03446	0.037	1e-05
YDL168W	SFA1		1.00478	0.061	1.03513	0.063	-0.0348	0.06	6e-05
YDL169C	UGX2		0.99497	0.192	1.01032	0.007	-0.02187	0.192	0.00193
YDL170W	UGA3		0.91766	0.058	1.03716	0.073	-0.13298	0.058	7e-05
YDL171C	GLT1		1.05033	0.074	1.09255	0.022	-0.04857	0.074	9e-05
YDL172C	YDL172C		0.97076	0.099	1.00033	0.027	-0.04354	0.099	0.00029
YDL173W	PAR32		1.03737	0.049	0.95681	0.019	0.07105	0.049	3e-05
YDL174C	DLD1		0.99074	0.026	1.06285	0.049	-0.08531	0.026	1e-05
YDL175C	AIR2		1.00985	0.035	0.90865	0.026	0.0959	0.035	1e-05
YDL176W	YDL176W		1.01672	0.082	1.14758	0.131	-0.15352	0.081	0.00014
YDL177C	YDL177C		0.99139	0.042	1.08382	0.1	-0.07304	0.042	2e-05
YDL178W	DLD2		1.03926	0.021	1.07058	0.092	-0.01346	0.021	0
YDL179W	PCL9		1.00881	0.06	1.12459	0.006	-0.12206	0.06	6e-05
YDL180W	YDL180W		0.9395	0.118	0.85741	0.189	0.05542	0.118	0.00054
YDL181W	INH1		1.06258	0.075	1.03048	0.045	0.03456	0.075	0.00166	status=JK
YDL182W	LYS20		1.02464	0.097	0.9741	0.103	0.05479	0.097	0.00023
YDL183C	YDL183C		0.88557	0.155	0.94047	0.091	-0.05727	0.155	0.00144
YDL184C	RPL41A		1.04605	0.005	1.03367	0.059	0.01401	0.005	1e-05	status=JK
YDL185W	VMA1		0.99654	0.023	1.00772	0.106	0.02092	0.023	0
YDL186W	YDL186W		1.00837	0.031	1.00075	0.101	-0.00807	0.031	1e-05
YDL187C	YDL187C		0.99956	0.01	1.00229	0.066	0.00594	0.01	3e-05	status=JK
YDL188C	PPH22		1.00958	0.05	1.02067	0.065	-0.00482	0.05	3e-05
YDL189W	RBS1		1.00416	0.03	0.97211	0.04	0.03052	0.03	1e-05
YDL190C	UFD2		0.97476	0.04	0.98911	0.057	-0.01731	0.04	2e-05
YDL191W	RPL35A		0.90211	0.012	1.00538	0.007	-0.10224	0.012	6e-05	status=JK
YDL192W	ARF1		0.64757	0.016	0.36857	0.023	0.28473	0.016	0.0002	status=JK
YDL194W	SNF3		1.03181	0.032	0.93576	0.005	0.09558	0.032	1e-05
YDL197C	ASF2		0.97594	0.011	0.98059	0.061	-0.01288	0.011	4e-05	status=JK
YDL199C	YDL199C		1.00459	0.031	1.05378	0.053	-0.05805	0.031	1e-05
YDL200C	MGT1		0.9991	0.045	0.99306	0.047	0.00624	0.045	3e-05
YDL201W	TRM8		1.00752	0.02	1.01036	0.036	-0.00572	0.02	0
YDL203C	ACK1		1.02593	0.011	0.99329	0.022	0.04017	0.011	4e-05	status=JK
YDL204W	RTN2		0.99264	0.013	0.99622	0.071	-0.01599	0.013	0
YDL206W	YDL206W		1.04396	0.024	1.0504	0.004	-0.00747	0.024	0
YDL210W	UGA4		1.05023	0.015	1.03871	0.029	0.01254	0.015	0
YDL211C	YDL211C		1.0464	0.019	1.02541	0.024	0.01761	0.019	0.00011	status=JK
YDL213C	NOP6		0.97438	0.031	1.00564	0.036	-0.04001	0.031	1e-05
YDL214C	PRR2		1.02344	0.041	0.97499	0.03	0.03311	0.041	2e-05
YDL215C	GDH2		0.93426	0.005	0.9353	0.117	-0.04143	0.005	1e-05	status=JK
YDL216C	RRI1		1.00029	0.02	0.98008	0.048	0.01709	0.02	0
YDL218W	YDL218W		1.01264	0.072	0.98093	0.041	0.03612	0.072	0.0001
YDL219W	DTD1		1.01775	0.052	1.07486	0.088	-0.05603	0.052	4e-05
YDL222C	FMP45		1.00789	0.018	1.0514	0.036	-0.04582	0.018	0
YDL223C	HBT1		1.02122	0.037	1.04769	0.039	-0.02999	0.036	1e-05
YDL224C	WHI4		1.00206	0.054	1.07663	0.064	-0.07872	0.053	4e-05
YDL226C	GCS1		0.94455	0.049	0.99006	0.057	-0.03451	0.049	4e-05
YDL227C	HO		0.96399	0.015	0.99696	0.017	-0.03578	0.015	0
YDL229W	SSB1		0.98179	0.008	0.81619	0.028	0.15437	0.008	2e-05	status=JK
YDL230W	PTP1		1.00938	0.058	1.06451	0.021	-0.05664	0.058	5e-05
YDL231C	BRE4		1.00635	0.019	0.99023	0.026	0.01566	0.019	0
YDL232W	OST4		0.91392	0.014	0.8415	0.022	0.07349	0.014	0
YDL233W	MFG1		1.0533	0.049	1.07322	0.026	-0.01672	0.049	3e-05
YDL234C	GYP7		1.00615	0.04	1.09993	0.053	-0.07806	0.04	2e-05
YDL236W	PHO13		0.99338	0.007	0.97006	0.17	0.04413	0.007	2e-05	status=JK
YDL237W	AIM6		1.04614	0.03	1.03696	0.051	0.02312	0.03	1e-05
YDL238C	GUD1		1.05332	0.001	0.95079	0.02	0.10123	0.001	0	status=JK
YDL239C	ADY3		0.96719	0.032	0.93754	0.049	0.02272	0.032	1e-05
YDL240W	LRG1		0.98609	0.021	0.94862	0.051	0.03815	0.021	0.00015	status=JK
YDL241W	YDL241W		1.03898	0.023	1.04087	0.065	0.00163	0.023	0
YDL242W	YDL242W		0.95804	0.017	1.02229	0.062	-0.0698	0.017	0.0001	status=JK
YDL243C	AAD4		1.02335	0.034	1.02658	0.068	0.0066	0.033	1e-05
YDR001C	NTH1		0.96084	0.023	0.91213	0.005	0.05202	0.023	0
YDR003W	RCR2		1.01938	0.011	0.96384	0.072	0.06371	0.011	4e-05	status=JK
YDR004W	RAD57		0.95003	0.012	0.80912	0.029	0.13046	0.012	6e-05	status=JK
YDR005C	MAF1		1.00508	0.014	0.99165	0.024	0.01516	0.014	0
YDR006C	SOK1		0.87471	0.017	0.81808	0.064	0.07435	0.017	0
YDR007W	TRP1		1.02363	0.015	1.08003	0.037	-0.04603	0.015	0
YDR008C	YDR008C		0.97502	0.021	0.9637	0.05	0.01911	0.021	0.00016	status=JK
YDR009W	GAL3		0.99182	0.039	1.00003	0.119	-0.01485	0.039	2e-05
YDR010C	YDR010C		1.09126	0.046	1.08482	0.099	0.00717	0.046	2e-05
YDR011W	SNQ2		1.02411	0.01	1.06621	0.027	-0.04326	0.01	0
YDR014W	RAD61		0.96413	0.035	0.99449	0.071	-0.03279	0.035	1e-05
YDR015C	YDR015C		0.98319	0.05	0.93867	0.076	0.03799	0.05	4e-05
YDR018C	YDR018C		1.04508	0.022	0.95877	0.066	0.09045	0.022	0
YDR019C	GCV1		1.01129	0.006	0.9762	0.045	0.0281	0.006	1e-05	status=JK
YDR020C	DAS2		1.10853	0.031	1.09195	0.084	0.01291	0.031	1e-05
YDR022C	ATG31		1.05772	0.042	1.03941	0.055	0.01923	0.042	2e-05
YDR024W	YDR024W		0.91939	0.033	0.85491	0.155	0.06303	0.033	1e-05
YDR025W	RPS11A		0.87772	0.025	0.69023	0.172	0.15566	0.024	1e-05
YDR026C	NSI1		1.00701	0.031	1.02702	0	-0.02032	0.031	1e-05
YDR029W	YDR029W		1.03163	0.028	0.95822	0.035	0.09256	0.028	1e-05
YDR030C	RAD28		1.04207	0.01	1.10303	0.074	-0.04301	0.01	3e-05	status=JK
YDR031W	MIC14		0.97501	0.026	0.98202	0.069	-0.00875	0.026	0
YDR032C	PST2		0.96792	0.051	0.94928	0.014	0.01467	0.05	4e-05
YDR033W	MRH1		1.0143	0.067	0.94426	0.141	0.03704	0.067	8e-05
YDR034C	LYS14		0.28673	0.08	0.22223	0.019	0.06345	0.08	0.00553
YDR035W	ARO3		1.10174	0.098	1.02519	0.088	0.08103	0.098	0.00019
YDR036C	EHD3		0.85239	0.021	0.98294	0.079	-0.12524	0.021	0.0002	status=JK
YDR042C	YDR042C		0.99869	0.12	1.12112	0.009	-0.12742	0.12	0.00048
YDR043C	NRG1		1.06588	0.051	1.03198	0.035	0.02377	0.051	3e-05
YDR046C	BAP3		1.02175	0.036	0.98244	0.062	0.03224	0.036	1e-05
YDR048C	YDR048C		0.90433	0.014	1.08322	0.089	-0.15754	0.014	8e-05	status=JK
YDR049W	VMS1		0.87744	0.053	0.93006	0.121	-0.06275	0.053	6e-05
YDR051C	DET1		0.97815	0.044	1.01348	0.126	-0.00151	0.044	2e-05
YDR055W	PST1		1.06648	0.085	1.11179	0.074	-0.02519	0.084	0.00014
YDR056C	YDR056C		1.03614	0.044	0.97047	0.063	0.06936	0.044	2e-05
YDR057W	YOS9		1.056	0.026	1.19639	0.071	-0.13439	0.025	0
YDR058C	TGL2		0.98918	0.009	0.91751	0.017	0.07972	0.009	0
YDR059C	UBC5		1.11442	0.036	1.21863	0.065	-0.10503	0.036	1e-05
YDR061W	YDR061W		1.00564	0.006	1.04155	0.069	-0.02042	0.006	0
YDR063W	AIM7		1.00727	0.025	0.97952	0.051	0.01663	0.025	0.00021	status=JK
YDR066C	RTR2		1.06489	0.01	0.95256	0.149	0.08412	0.01	0
YDR067C	OCA6		1.05739	0.034	1.10766	0.086	-0.05333	0.034	0.00034	status=JK
YDR068W	DOS2		0.96797	0.103	0.9507	0.231	-0.03504	0.103	0.00033
YDR070C	FMP16		0.98712	0.098	1.03537	0.095	-0.03363	0.098	0.00027
YDR071C	PAA1		0.97911	0.054	0.7906	0.095	0.16506	0.054	5e-05
YDR072C	IPT1		0.90268	0.039	0.94801	0.023	-0.03987	0.039	2e-05
YDR073W	SNF11		1.11113	0.034	1.04251	0.096	0.06313	0.034	1e-05
YDR074W	TPS2		0.93555	0.014	1.1368	0.042	-0.20451	0.014	0
YDR075W	PPH3		0.98409	0.056	0.87388	0.042	0.1178	0.056	5e-05
YDR076W	RAD55		0.89108	0.037	0.84027	0.124	0.0422	0.037	2e-05
YDR077W	SED1		1.02315	0.045	1.00661	0.105	0.00685	0.045	2e-05
YDR080W	VPS41		0.84563	0.032	0.88778	0.09	-0.05045	0.032	1e-05
YDR083W	RRP8		0.75549	0.016	0.47003	0.014	0.28796	0.016	0
YDR084C	TVP23		1.04088	0.057	0.98074	0.012	0.05985	0.057	5e-05
YDR085C	AFR1		1.06123	0.082	1.00493	0.069	0.04641	0.082	0.00013
YDR089W	YDR089W		1.02764	0.035	1.1104	0.01	-0.0863	0.035	1e-05
YDR090C	YDR090C		0.98785	0.019	1.04622	0.044	-0.05412	0.019	0
YDR092W	UBC13		0.92952	0.046	0.88183	0.133	0.03881	0.046	3e-05
YDR093W	DNF2		1.02987	0.007	1.07285	0.027	-0.02691	0.007	2e-05	status=JK
YDR094W	YDR094W		1.00099	0.005	1.04952	0.021	-0.04518	0.005	1e-05	status=JK
YDR095C	YDR095C		0.98688	0.053	1.05638	0.014	-0.07503	0.053	4e-05
YDR096W	GIS1		1.02811	0.016	1.08424	0.016	-0.05744	0.016	0
YDR097C	MSH6		0.99559	0.037	1.01611	0.031	-0.02594	0.037	1e-05
YDR098C	GRX3		1.00781	0.01	1.04059	0.106	-0.01435	0.01	3e-05	status=JK
YDR099W	BMH2		0.8544	0.006	0.94429	0.017	-0.09663	0.006	1e-05	status=JK
YDR100W	TVP15		1.01547	0.035	0.98963	0.06	0.0138	0.035	1e-05
YDR101C	ARX1		0.86068	0.022	0.85157	0.051	0.02226	0.022	0
YDR102C	YDR102C		0.9844	0.032	1.02989	0.048	-0.04464	0.032	1e-05
YDR103W	STE5		0	0	0	0	0	0	#NUM!
YDR104C	SPO71		1.0216	0.002	0.98685	0.05	0.03823	0.002	0	status=JK
YDR105C	TMS1		1.04124	0.03	1.04335	0.024	0.00571	0.03	1e-05
YDR107C	TMN2		1.00108	0.035	0.95737	0.008	0.04457	0.035	1e-05
YDR108W	TRS85		0.94338	0.007	0.92026	0.024	0.02785	0.007	0
YDR109C	YDR109C		1.05155	0.062	1.05118	0.022	-0.00543	0.062	6e-05
YDR110W	FOB1		1.05152	0.035	1.02023	0.102	0.01757	0.035	1e-05
YDR111C	ALT2		0.98748	0.051	1.00401	0.022	-0.00838	0.051	4e-05
YDR112W	YDR112W		1.02221	0.066	1.05335	0.083	-0.02753	0.065	7e-05
YDR116C	MRPL1		0.85414	0.023	0.59249	0.078	0.25943	0.023	1e-05
YDR117C	TMA64		1.03961	0.019	1.00991	0.025	0.02408	0.019	0
YDR119W	VBA4		0.97064	0.012	0.99583	0.087	-0.01182	0.012	5e-05	status=JK
YDR120C	TRM1		1.01904	0.011	0.92482	0.18	0.07607	0.011	0
YDR121W	DPB4		0.99291	0.01	0.98691	0.053	0.01533	0.01	0
YDR122W	KIN1		1.06327	0.027	1.10149	0.08	-0.05226	0.027	0
YDR123C	INO2		0.83973	0.032	0.72701	0.061	0.11796	0.032	1e-05
YDR124W	YDR124W		1.00491	0.029	1.03653	0.102	-0.02266	0.029	1e-05
YDR125C	ECM18		1.02574	0.064	1.04844	0.012	-0.02082	0.064	7e-05
YDR126W	SWF1		0.78481	0.111	0.75409	0.073	0.03959	0.111	0.00077
YDR127W	ARO1		0.75587	0.005	0.38062	0.006	0.37853	0.005	1e-05	status=JK
YDR128W	MTC5		0.96948	0.046	1.03602	0.076	-0.07411	0.046	3e-05
YDR130C	FIN1		0.98706	0.011	0.99452	0.015	-0.00425	0.011	0
YDR131C	YDR131C		0.976	0.033	1.02424	0.192	-0.09897	0.033	1e-05
YDR132C	YDR132C		0.97589	0.053	0.94886	0.072	0.01687	0.053	4e-05
YDR133C	YDR133C		1.07068	0.074	1.07231	0.096	0.01159	0.074	9e-05
YDR134C	YDR134C		1.03744	0.026	1.07672	0.011	-0.03212	0.026	0
YDR135C	YCF1		1.04116	0.023	1.0583	0.008	-0.01936	0.023	0
YDR139C	RUB1		1.00683	0.02	1.05145	0.014	-0.04327	0.02	0
YDR142C	PEX7		1.01178	0.035	1.06074	0.007	-0.05082	0.035	1e-05
YDR143C	SAN1		1.18893	0.027	1.21139	0.081	-0.01175	0.027	0
YDR144C	MKC7		0.92635	0.046	0.80271	0.08	0.11511	0.046	3e-05
YDR146C	SWI5		0.98049	0.043	0.94458	0.084	0.05708	0.043	2e-05
YDR147W	EKI1		0.97369	0.007	0.92109	0.101	0.04111	0.007	2e-05	status=JK
YDR148C	KGD2		1.00262	0.007	1.0406	0.019	-0.04466	0.007	2e-05	status=JK
YDR149C	YDR149C		0.85449	0.013	0.96124	0.081	-0.10064	0.013	0
YDR150W	NUM1		0.89327	0.048	0.91929	0.054	-0.02262	0.048	4e-05
YDR151C	CTH1		1.07191	0.035	1.06689	0.08	-0.00176	0.035	1e-05
YDR152W	GIR2		1.08546	0.023	1.04993	0.055	0.04195	0.023	0
YDR153C	ENT5		1.0332	0.009	1.00992	0.076	0.02802	0.009	3e-05	status=JK
YDR154C	YDR154C		0.94812	0.115	0.91538	0.16	0.00019	0.115	0.00049
YDR155C	CPR1		1.06407	0.051	0.96889	0.243	0.04161	0.051	3e-05
YDR156W	RPA14		0.98335	0.006	0.88358	0.129	0.118	0.006	1e-05	status=JK
YDR157W	YDR157W		1.04839	0.015	1.13278	0.014	-0.08252	0.015	7e-05	status=JK
YDR158W	HOM2		0.907	0.034	0.74961	0.063	0.17688	0.034	1e-05
YDR159W	SAC3		0.65484	0.018	0.35672	0.033	0.30599	0.018	1e-05
YDR161W	YDR161W		0.98274	0.038	1.0134	0.104	-0.03697	0.038	2e-05
YDR162C	NBP2		0.90486	0.027	0.93151	0.146	-0.04545	0.027	1e-05
YDR163W	CWC15		1.04019	0.012	1.03054	0.14	0.02034	0.012	0
YDR165W	TRM82		0.95412	0.009	1.04129	0.1	-0.08327	0.009	3e-05	status=JK
YDR169C	STB3		0.99356	0.056	1.04769	0.1	-0.04606	0.056	5e-05
YDR171W	HSP42		1.04026	0.032	0.84532	0.087	0.18386	0.032	1e-05
YDR173C	ARG82		0.34765	0.04	0.14911	0.006	0.20108	0.04	0.00042
YDR174W	HMO1		0.57481	0.047	0.4151	0.046	0.1616	0.046	0.00015
YDR178W	SDH4		0.97588	0.105	1.0731	0.19	-0.03402	0.105	0.00034
YDR179C	CSN9		1.06881	0.046	1.00151	0.215	0.07413	0.046	2e-05
YDR179W-A	YDR179W-A		0.95426	0.082	0.95033	0.16	-0.02643	0.082	0.00017
YDR181C	SAS4		1.00598	0.053	0.96117	0.223	0.01936	0.053	4e-05
YDR183W	PLP1		0.93701	0.006	0.95028	0.055	-0.02189	0.006	0
YDR184C	ATC1		0.90761	0.004	0.97377	0.027	-0.07285	0.004	1e-05	status=JK
YDR185C	UPS3		0.95262	0.013	0.97285	0.006	-0.01814	0.013	0
YDR186C	YDR186C		1.01644	0.024	0.99103	0.025	0.01948	0.024	0.00019	status=JK
YDR191W	HST4		1.0563	0.021	0.99726	0.104	0.07281	0.021	0
YDR192C	NUP42		1.05691	0.011	1.07382	0.028	-0.01449	0.011	4e-05	status=JK
YDR193W	YDR193W		1.0402	0.037	1.0271	0.039	0.03621	0.037	1e-05
YDR198C	RKM2		1.08295	0.079	1.10204	0.046	-0.0207	0.079	0.00011
YDR199W	YDR199W		1.12194	0.08	1.19499	0.011	-0.07783	0.08	0.0001
YDR202C	RAV2		0.90883	0.016	0.92363	0.171	-0.0432	0.016	0.0001	status=JK
YDR203W	YDR203W		1.00934	0.009	0.99732	0.099	0.01663	0.009	3e-05	status=JK
YDR205W	MSC2		1.00812	0.012	0.97375	0.05	0.04936	0.012	0
YDR206W	EBS1		1.01744	0.019	0.98354	0.036	0.02733	0.019	0
YDR207C	UME6		0.73352	0.023	0.29527	0.019	0.43325	0.023	1e-05
YDR209C	YDR209C		1.00623	0.012	1.06719	0.019	-0.05983	0.012	0
YDR210W	YDR210W		1.03096	0.032	0.98835	0.015	0.0404	0.032	1e-05
YDR213W	UPC2		1.00273	0.023	0.998	0.005	0.00344	0.023	0
YDR214W	AHA1		1.04567	0.079	1.05429	0.083	0.00834	0.078	0.00012
YDR215C	YDR215C		0.99565	0.038	1.00264	0.024	-0.00175	0.038	1e-05
YDR216W	ADR1		0.98324	0.005	1.04137	0.009	-0.06071	0.005	1e-05	status=JK
YDR217C	RAD9		0.98665	0.028	0.94992	0.013	0.03241	0.028	1e-05
YDR218C	SPR28		1.02799	0.032	0.96679	0.133	0.05069	0.032	1e-05
YDR219C	MFB1		0.91423	0.017	0.88257	0.065	0.02476	0.017	0
YDR220C	YDR220C		0.99739	0.016	0.98876	0.011	0.00869	0.016	0
YDR221W	GTB1		1.03823	0.006	1.04374	0.017	-0.00152	0.006	1e-05	status=JK
YDR222W	YDR222W		0.99409	0.023	1.01089	0.064	-0.03152	0.023	0
YDR223W	CRF1		1.05111	0.057	0.96877	0.017	0.0919	0.056	4e-05
YDR225W	HTA1		1.00897	0.029	1.09269	0.13	-0.07486	0.029	1e-05
YDR227W	SIR4		0	0	0	0	0	0	#NUM!
YDR229W	IVY1		1.02592	0.008	1.01594	0.035	0.0164	0.008	2e-05	status=JK
YDR233C	RTN1		0.95721	0.021	0.96005	0.038	-0.00449	0.021	0
YDR234W	LYS4		0.39007	0.015	0.16248	0.017	0.21805	0.015	0.00051	status=JK
YDR239C	YDR239C		1.00525	0.027	1.02782	0.086	-0.00956	0.027	0.00025	status=JK
YDR241W	YDR241W		0.90947	0.044	0.75956	0.117	0.15558	0.044	3e-05
YDR242W	AMD2		1.19346	0.016	1.08789	0.089	0.11016	0.016	6e-05	status=JK
YDR244W	PEX5		1.05055	0.015	1.0512	0.036	-0.00784	0.015	7e-05	status=JK
YDR245W	MNN10		0.77638	0.037	0.59027	0.007	0.19005	0.037	3e-05
YDR247W	VHS1		0.97488	0.013	0.9772	0.075	-0.00131	0.013	0
YDR248C	YDR248C		1.01312	0.033	0.99311	0.032	0.02839	0.033	1e-05
YDR249C	YDR249C		1.06632	0.08	0.95275	0.281	0.04031	0.08	0.00012
YDR250C	YDR250C		1.00539	0.06	1.04074	0.069	-0.01442	0.06	6e-05
YDR251W	PAM1		1.03757	0.011	0.99687	0.074	0.03023	0.011	4e-05	status=JK
YDR252W	BTT1		1.04611	0.009	1.01463	0.03	0.0359	0.009	0
YDR253C	MET32		0.98861	0.013	1.03621	0.055	-0.05532	0.013	0
YDR254W	CHL4		1.03115	0.026	1.03124	0.021	0.00889	0.026	0
YDR255C	RMD5		1.07968	0.006	1.11201	0.082	-0.0125	0.006	1e-05	status=JK
YDR256C	CTA1		1.0134	0.013	1.10723	0.012	-0.09835	0.013	0
YDR257C	RKM4		0.97166	0.069	0.92314	0.031	0.05471	0.069	0.0001
YDR258C	HSP78		0.99122	0.044	0.95123	0.058	0.05724	0.044	2e-05
YDR259C	YAP6		1.01627	0.117	0.95729	0.148	0.07888	0.117	0.00041
YDR260C	SWM1		1.00076	0.016	0.99859	0.039	0.00174	0.016	8e-05	status=JK
YDR261C	EXG2		1.04367	0.006	1.03787	0.067	0.00346	0.006	1e-05	status=JK
YDR262W	YDR262W		1.01299	0.042	1.05916	0.01	-0.04561	0.042	2e-05
YDR263C	DIN7		1.00684	0.038	1.05305	0.101	-0.05395	0.038	1e-05
YDR265W	PEX10		1.00828	0.006	0.99908	0.127	-0.01234	0.006	1e-05	status=JK
YDR266C	HEL2		1.01272	0.041	0.98692	0.063	0.02459	0.041	2e-05
YDR269C	YDR269C		0.99983	0.076	1.01329	0.068	-0.0227	0.076	0.00012
YDR270W	CCC2		0.98967	0.004	1.04364	0.016	-0.04414	0.004	1e-05	status=JK
YDR271C	YDR271C		0.99299	0.081	1.06301	0.028	-0.07014	0.081	0.00015
YDR272W	GLO2		1.01813	0.009	1.06694	0.024	-0.04288	0.009	0
YDR273W	DON1		1.04426	0.061	1.03767	0.012	0.01364	0.061	6e-05
YDR274C	YDR274C		1.05807	0.086	1.1018	0.111	-0.01813	0.086	0.00015
YDR275W	BSC2		1.02521	0.048	1.03174	0.061	-0.00368	0.048	3e-05
YDR276C	PMP3		0.89606	0.023	0.95404	0.027	-0.05977	0.023	0
YDR277C	MTH1		0.97549	0.013	1.01048	0.017	-0.03385	0.013	6e-05	status=JK
YDR278C	YDR278C		0.96651	0.044	1.0107	0.068	-0.03612	0.044	0.0007	status=JK
YDR279W	RNH202		1.05299	0.003	1.0201	0.025	0.03202	0.003	0	status=JK
YDR281C	PHM6		1.00732	0.021	0.99381	0.148	0.02567	0.021	0
YDR282C	YDR282C		1.01508	0.029	1.05453	0.065	-0.03044	0.029	1e-05
YDR284C	DPP1		1.02903	0.044	1.02956	0.077	-0.00821	0.044	2e-05
YDR285W	ZIP1		1.02477	0.064	1.01454	0.114	0.00296	0.064	7e-05
YDR286C	YDR286C		1.00857	0.052	1.02019	0.058	-0.00311	0.052	4e-05
YDR287W	INM2		1.03296	0.022	1.10169	0.072	-0.0835	0.022	0
YDR289C	RTT103		0.93641	0.056	0.78717	0.172	0.10609	0.056	6e-05
YDR290W	YDR290W		0.94952	0.055	0.91971	0.064	0.01913	0.055	5e-05
YDR291W	HRQ1		1.00027	0.059	0.68359	0.049	0.29561	0.059	6e-05
YDR293C	SSD1		0.79109	0.075	0.68279	0.15	0.12012	0.075	0.00023
YDR294C	DPL1		1.01389	0.045	0.94013	0.196	0.12355	0.045	2e-05
YDR297W	SUR2		0.93748	0.002	0.94043	0.182	-0.02134	0.002	0	status=JK
YDR304C	CPR5		1.02026	0.104	1.14468	0.043	-0.14743	0.104	0.00029
YDR305C	HNT2		1.05881	0.059	1.0981	0.056	-0.03784	0.059	5e-05
YDR306C	YDR306C		1.00087	0.009	0.98655	0.096	0.00084	0.009	0
YDR307W	PMT7		0.96901	0.02	0.93002	0.077	0.02501	0.02	0
YDR309C	GIC2		0.95353	0.021	1.00215	0.011	-0.05347	0.021	0
YDR310C	SUM1		0.99188	0.019	0.96853	0.12	0.04857	0.019	0
YDR312W	SSF2		1.01733	0.026	0.98778	0.043	0.03594	0.026	0
YDR313C	PIB1		1.0288	0.013	0.908	0.048	0.113	0.013	0
YDR314C	RAD34		1.08427	0.048	1.07621	0.065	0.00901	0.048	2e-05
YDR315C	IPK1		0.87202	0.021	0.86625	0.003	0.00601	0.021	0
YDR316W	OMS1		0.94018	0.08	0.94613	0.111	-0.01111	0.08	0.00017
YDR317W	HIM1		1.08924	0.069	1.06781	0.045	0.02576	0.069	7e-05
YDR318W	MCM21		0.97661	0.02	1.04797	0.057	-0.0445	0.02	0
YDR319C	YFT2		1.03447	0.031	1.04273	0.032	-0.00736	0.031	1e-05
YDR320C	SWA2		0.90627	0.059	0.85265	0.005	0.05244	0.059	8e-05
YDR321W	ASP1		1.05921	0.058	1.05775	0.113	0.03251	0.058	5e-05
YDR326C	YSP2		1.0536	0.015	0.8974	0.162	0.13895	0.015	7e-05	status=JK
YDR329C	PEX3		1.03612	0.003	1.02937	0.072	0.0158	0.003	0	status=JK
YDR330W	UBX5		1.0109	0.024	0.98353	0.053	0.02319	0.024	0
YDR332W	IRC3		1.01039	0.035	0.97981	0.079	0.0498	0.035	1e-05
YDR333C	YDR333C		0.96079	0.016	0.96552	0.091	-0.00437	0.016	0
YDR334W	SWR1		0.93806	0.035	0.91996	0.032	0.00949	0.035	1e-05
YDR335W	MSN5		0.97602	0.049	1.0756	0.043	-0.10742	0.049	3e-05
YDR336W	YDR336W		0.9264	0.086	0.84248	0.065	0.09898	0.086	0.00022
YDR338C	YDR338C		0.97762	0.048	0.94719	0.109	0.03197	0.048	3e-05
YDR340W	YDR340W		0.99749	0.011	1.0228	0.057	-0.02181	0.011	4e-05	status=JK
YDR344C	YDR344C		1.02262	0.015	0.95121	0.016	0.07241	0.015	0
YDR345C	HXT3		1.02909	0.018	1.07581	0.039	-0.04679	0.018	0
YDR346C	SVF1		1.00773	0.023	1.06301	0.059	-0.0384	0.023	0
YDR348C	PAL1		0.98905	0.061	1.00532	0.084	-0.0047	0.061	7e-05
YDR349C	YPS7		0.97316	0.024	1.03697	0.024	-0.07141	0.024	0
YDR351W	SBE2		1.00913	0.062	1.02274	0.05	-0.00157	0.061	6e-05
YDR352W	YPQ2		1.04569	0.063	0.99376	0.068	0.06796	0.063	6e-05
YDR354W	TRP4		1.00508	0.019	1.0212	0.081	-0.01791	0.019	0
YDR357C	CNL1		0.96352	0.02	0.9921	0.162	-0.04204	0.02	0
YDR358W	GGA1		1.00524	0.053	0.98491	0.085	0.01968	0.053	4e-05
YDR359C	EAF1		0.52255	0.135	0.32543	0.116	0.19061	0.135	0.0045
YDR360W	YDR360W		0.97291	0.028	0.93553	0.054	0.03956	0.028	1e-05
YDR363W	ESC2		0.94472	0.013	0.92456	0.017	0.02498	0.013	0
YDR363W-A	SEM1		1.03322	0.021	0.97072	0.24	0.00327	0.021	0.00014	status=JK
YDR368W	YPR1		1.01574	0.025	1.06457	0.029	-0.04977	0.025	0
YDR369C	XRS2		0.97047	0.051	0.96822	0.01	-0.00129	0.051	4e-05
YDR370C	YDR370C		1.0177	0.001	1.06381	0.108	-0.07493	0.001	0	status=JK
YDR371W	CTS2		1.06461	0.029	1.04652	0.057	0.02406	0.029	1e-05
YDR372C	VPS74		0.89405	0.003	0.84616	0.018	0.05231	0.003	0
YDR374C	YDR374C		1.01124	0.067	1.04241	0.053	-0.01642	0.067	8e-05
YDR375C	BCS1		0.81763	0.007	0.75161	0.064	0.05144	0.007	2e-05	status=JK
YDR378C	LSM6		0.79977	0.017	0.6874	0.013	0.11416	0.017	0
YDR379W	RGA2		1.03641	0.019	1.10135	0.007	-0.06224	0.019	0
YDR380W	ARO10		0.99642	0.035	0.9654	0.051	0.0312	0.035	1e-05
YDR382W	RPP2B		1.00472	0.013	1.07719	0.008	-0.07429	0.013	5e-05	status=JK
YDR383C	NKP1		0.94631	0.04	0.98127	0.008	-0.03088	0.04	2e-05
YDR384C	ATO3		0.98588	0.046	1.08708	0.022	-0.0958	0.046	3e-05
YDR385W	EFT2		0.89082	0.015	0.91097	0.014	-0.02619	0.015	9e-05	status=JK
YDR386W	MUS81		0.96826	0.047	0.89321	0.068	0.08611	0.047	3e-05
YDR387C	YDR387C		1.0239	0.029	1.02564	0.06	0.01821	0.029	1e-05
YDR388W	RVS167		0.71939	0.025	0.86053	0.056	-0.13796	0.024	1e-05
YDR389W	SAC7		0.95209	0.019	1.0792	0.038	-0.13017	0.019	0
YDR391C	YDR391C		1.0677	0.014	1.09256	0.038	-0.0314	0.014	0
YDR392W	SPT3		0.86486	0.006	0.75195	0.046	0.11065	0.006	1e-05	status=JK
YDR393W	SHE9		0.84914	0.016	0.7702	0.061	0.09725	0.016	0
YDR395W	SXM1		1.00848	0.013	0.83094	0.096	0.17893	0.013	0
YDR399W	HPT1		1.00644	0.084	1.03103	0.157	0.02071	0.084	0.00016
YDR400W	URH1		1.01504	0.043	1.08672	0.078	-0.05135	0.043	2e-05
YDR401W	YDR401W		1.0471	0.008	1.09925	0.137	-0.03703	0.008	2e-05	status=JK
YDR402C	DIT2		1.03681	0.01	0.97758	0.054	0.04732	0.01	3e-05	status=JK
YDR403W	DIT1		0.98651	0.026	0.92504	0.094	0.04043	0.026	0
YDR406W	PDR15		1.00557	0.001	1.06304	0.075	-0.06234	0.001	0	status=JK
YDR408C	ADE8		1.0027	0.044	0.98498	0.103	0.00605	0.044	2e-05
YDR409W	SIZ1		1.06264	0.026	1.14954	0.087	-0.09674	0.026	0
YDR410C	STE14		0.00038	0	0	0	0.00038	0	0.18169
YDR411C	DFM1		1.04078	0.074	1.05003	0.057	-0.00646	0.074	0.0001
YDR414C	ERD1		0.93126	0.008	0.84013	0.097	0.10302	0.008	2e-05	status=JK
YDR415C	YDR415C		0.96352	0.014	1.00885	0.184	-0.04541	0.014	7e-05	status=JK
YDR419W	RAD30		0.99843	0.019	0.93443	0.194	0.04636	0.019	0
YDR420W	HKR1		0.95927	0.033	0.96853	0.129	-0.03331	0.033	1e-05
YDR421W	ARO80		1.01012	0.052	0.95028	0.048	0.08388	0.052	4e-05
YDR422C	SIP1		1.00775	0.006	1.09266	0.029	-0.0762	0.006	1e-05	status=JK
YDR423C	CAD1		1.00985	0.098	1.04276	0.029	-0.02808	0.098	0.00025
YDR424C	DYN2		0.95635	0.087	0.91428	0.133	0.02571	0.087	0.0002
YDR425W	SNX41		0.87669	0.109	0.93322	0.068	-0.06039	0.109	0.00053
YDR426C	YDR426C		0.93868	0.04	0.9949	0.037	-0.0449	0.04	2e-05
YDR428C	BNA7		0.99398	0.041	0.97342	0.029	0.01661	0.041	2e-05
YDR430C	CYM1		1.05664	0.043	1.02476	0.013	0.02976	0.043	2e-05
YDR431W	YDR431W		0.98738	0.013	0.99781	0.074	0.00098	0.013	6e-05	status=JK
YDR435C	PPM1		0.98599	0.022	0.95856	0.047	0.0214	0.022	0
YDR436W	PPZ2		1.15447	0.053	1.14501	0.045	0.00829	0.053	3e-05
YDR438W	THI74		0.97011	0.015	0.99798	0.009	-0.0277	0.015	8e-05	status=JK
YDR439W	LRS4		1.02308	0.044	1.07045	0.038	-0.04596	0.044	2e-05
YDR440W	DOT1		1.03271	0.049	0.98687	0.038	0.04276	0.049	3e-05
YDR441C	APT2		1.00086	0.023	0.99406	0.051	0.01277	0.023	0
YDR444W	YDR444W		1.0323	0.046	1.09758	0.022	-0.07302	0.046	2e-05
YDR445C	YDR445C		1.04051	0.05	1.07219	0.058	-0.0172	0.05	3e-05
YDR446W	ECM11		0.96766	0.026	1.02441	0.016	-0.05308	0.025	1e-05
YDR447C	RPS17B		0.97284	0.01	0.96045	0.044	0.00981	0.01	0
YDR451C	YHP1		1.02148	0.004	1.03715	0.054	-0.01808	0.004	0	status=JK
YDR452W	PPN1		1.10991	0.058	1.09289	0.116	0.01328	0.058	4e-05
YDR453C	TSA2		1.07927	0.075	0.99407	0.101	0.07358	0.075	9e-05
YDR455C	YDR455C		0.81603	0.051	0.80143	0.024	0.01937	0.051	7e-05
YDR458C	HEH2		0.94412	0.02	0.98318	0.101	-0.05554	0.02	0
YDR459C	PFA5		0.9548	0.029	0.95235	0.04	0.01151	0.029	1e-05
YDR461W	MFA1		0.90373	0.168	0.92025	0.132	-0.02359	0.168	0.00173
YDR463W	STP1		0.88036	0.103	0.7524	0.013	0.1304	0.103	0.00044
YDR465C	RMT2		1.05601	0.072	1.06251	0.049	-0.01262	0.072	9e-05
YDR466W	PKH3		1.02362	0.031	1.06675	0.017	-0.05145	0.031	1e-05
YDR467C	YDR467C		1.02156	0.015	1.01354	0.01	0.00804	0.015	0
YDR469W	SDC1		0.93887	0.023	0.96675	0.004	-0.02755	0.023	0.0002	status=JK
YDR471W	RPL27B		0.91968	0.002	0.97089	0.063	-0.03967	0.002	0	status=JK
YDR474C	YDR474C		1.11297	0.017	1.09666	0.067	0.03181	0.017	8e-05	status=JK
YDR475C	JIP4		1.0155	0.074	1.10149	0.018	-0.08666	0.074	0.00011
YDR476C	YDR476C		1.0161	0.162	0.9903	0.009	0.0258	0.162	0.00109
YDR477W	SNF1		0.80908	0.026	0.58991	0.165	0.18068	0.026	1e-05
YDR479C	PEX29		0.99441	0.011	0.93161	0.041	0.06331	0.011	4e-05	status=JK
YDR480W	DIG2		1.03653	0.033	0.99044	0.059	0.05466	0.033	1e-05
YDR481C	PHO8		1.07357	0.109	1.0755	0.09	-0.00053	0.109	0.00029
YDR482C	CWC21		1.0107	0.02	0.98289	0.077	0.01632	0.02	0.00013	status=JK
YDR483W	KRE2		1.07381	0.079	1.09895	0.158	-0.03564	0.079	0.00011
YDR483W	KRE2		1.01491	0.035	1.01072	0.021	0.00553	0.035	1e-05
YDR485C	VPS72		1.07318	0.031	0.99311	0.009	0.08317	0.031	1e-05
YDR486C	VPS60		0.89931	0.068	0.93353	0.013	-0.0387	0.067	0.00012
YDR488C	PAC11		0.94567	0.077	0.9621	0.131	-0.03827	0.077	0.00015
YDR490C	PKH1		1.04372	0.104	1.07222	0.05	-0.02838	0.104	0.00027
YDR491C	YDR491C		0.97505	0.081	0.98652	0.017	-0.00162	0.081	0.00016
YDR492W	IZH1		1.04864	0.136	1.01155	0.039	0.04127	0.136	0.00059
YDR493W	MZM1		0.98748	0.091	0.87406	0.173	0.07985	0.091	0.00021
YDR494W	RSM28		1.06057	0.052	1.0202	0.014	0.04219	0.052	3e-05
YDR496C	PUF6		0.85145	0.043	0.87205	0.005	-0.01843	0.043	4e-05
YDR497C	ITR1		1.06108	0.014	1.04984	0.117	-0.00307	0.014	6e-05	status=JK
YDR500C	RPL37B		0	0	0	0	0	0	#NUM!
YDR501W	PLM2		1.0827	0.018	1.06233	0.015	0.01714	0.018	9e-05	status=JK
YDR502C	SAM2		0.93497	0.172	0.95437	0.186	-0.05213	0.172	0.00168
YDR503C	LPP1		1.01856	0.039	0.98916	0.025	0.03295	0.039	2e-05
YDR504C	SPG3		1.05863	0.046	0.98523	0.067	0.08405	0.046	2e-05
YDR505C	PSP1		0.94474	0.028	0.91285	0.064	0.01686	0.028	0.0003	status=JK
YDR506C	GMC1		1.02288	0.049	1.01947	0.041	0.00065	0.049	3e-05
YDR508C	GNP1		1.08362	0.028	1.01423	0.056	0.07856	0.028	0.00022	status=JK
YDR509W	YDR509W		0.93216	0.054	0.84734	0.063	0.10113	0.054	0.00113	status=JK
YDR511W	ACN9		1.05116	0.047	1.0899	0.076	-0.04144	0.047	3e-05
YDR512C	EMI1		0.83946	0.039	0.53623	0.039	0.30244	0.039	0.00073	status=JK
YDR513W	GRX2		1.01606	0.038	0.99693	0.042	0.02529	0.038	1e-05
YDR514C	YDR514C		0.85219	0.162	0.88958	0.062	-0.02634	0.162	0.00184
YDR515W	SLF1		1.06382	0.018	1.01619	0.044	0.05384	0.018	0
YDR516C	EMI2		1.06116	0.02	1.11131	0.091	-0.07688	0.02	0
YDR517W	GRH1		1.01488	0.037	1.02409	0.055	0.00644	0.037	1e-05
YDR519W	FPR2		0.96505	0.039	0.97812	0.063	-0.01174	0.039	2e-05
YDR520C	URC2		1.07143	0.043	0.99268	0.034	0.08359	0.043	2e-05
YDR522C	SPS2		1.03974	0.047	1.04698	0.023	-0.00322	0.047	0.00068	status=JK
YDR524C	AGE1		0.9601	0.249	0.97546	0.157	-0.0192	0.248	0.00452
YDR525W	YDR525W		0.97311	0.009	1.05914	0.091	-0.08469	0.009	3e-05	status=JK
YDR525W-A	SNA2		1.08958	0.062	1.04924	0.136	0.03195	0.062	5e-05
YDR528W	HLR1		1.03004	0.072	0.98443	0.029	0.05438	0.072	9e-05
YDR530C	APA2		1.12248	0.083	0.97449	0.04	0.14581	0.083	0.00011
YDR532C	KRE28		0.57303	0.105	0.18937	0.027	0.37843	0.105	0.00165
YDR533C	HSP31		1.11298	0.034	1.00718	0.004	0.10515	0.034	1e-05
YDR534C	FIT1		1.09235	0.02	1.01329	0.07	0.09053	0.02	0.00011	status=JK
YDR535C	YDR535C		0.92678	0.141	1.02365	0.096	-0.12246	0.14	0.00094
YDR536W	STL1		1.04076	0.207	1.02513	0.059	0.00643	0.207	0.00209
YDR537C	YDR537C		0.79614	0.032	0.91667	0.037	-0.11599	0.032	2e-05
YDR538W	PAD1		0.84012	0.135	0.9174	0.129	-0.0614	0.135	0.00112
YDR539W	FDC1		0.93881	0.164	0.87058	0.145	0.06265	0.164	0.00143
YDR540C	IRC4		1.09732	0.16	1.06722	0.104	0.06178	0.16	0.00084
YDR541C	YDR541C		0.98334	0.005	1.11769	0.081	-0.15807	0.005	1e-05	status=JK
YEL001C	IRC22		#NUM!	#NUM!	#NUM!	#NUM!	#NUM!	#NUM!	#NUM!	status=LK
YEL003W	GIM4		#NUM!	#NUM!	#NUM!	#NUM!	#NUM!	#NUM!	#NUM!	status=LK
YEL004W	YEA4		#NUM!	#NUM!	#NUM!	#NUM!	#NUM!	#NUM!	#NUM!	status=LK
YEL005C	VAB2		#NUM!	#NUM!	#NUM!	#NUM!	#NUM!	#NUM!	#NUM!	status=LK
YEL006W	YEA6		#NUM!	#NUM!	#NUM!	#NUM!	#NUM!	#NUM!	#NUM!	status=LK
YEL007W	MIT1		#NUM!	#NUM!	#NUM!	#NUM!	#NUM!	#NUM!	#NUM!	status=LK
YEL008W	YEL008W		#NUM!	#NUM!	#NUM!	#NUM!	#NUM!	#NUM!	#NUM!	status=LK
YEL010W	YEL010W		#NUM!	#NUM!	#NUM!	#NUM!	#NUM!	#NUM!	#NUM!	status=LK
YEL011W	GLC3		#NUM!	#NUM!	#NUM!	#NUM!	#NUM!	#NUM!	#NUM!	status=LK
YEL012W	UBC8		#NUM!	#NUM!	#NUM!	#NUM!	#NUM!	#NUM!	#NUM!	status=LK
YEL013W	VAC8		#NUM!	#NUM!	#NUM!	#NUM!	#NUM!	#NUM!	#NUM!	status=LK
YEL014C	YEL014C		#NUM!	#NUM!	#NUM!	#NUM!	#NUM!	#NUM!	#NUM!	status=LK
YEL015W	EDC3		#NUM!	#NUM!	#NUM!	#NUM!	#NUM!	#NUM!	#NUM!	status=LK
YEL016C	NPP2		#NUM!	#NUM!	#NUM!	#NUM!	#NUM!	#NUM!	#NUM!	status=LK
YEL017C-A	PMP2		#NUM!	#NUM!	#NUM!	#NUM!	#NUM!	#NUM!	#NUM!	status=LK
YEL017W	GTT3		#NUM!	#NUM!	#NUM!	#NUM!	#NUM!	#NUM!	#NUM!	status=LK
YEL020C	YEL020C		#NUM!	#NUM!	#NUM!	#NUM!	#NUM!	#NUM!	#NUM!	status=LK
YEL023C	YEL023C		#NUM!	#NUM!	#NUM!	#NUM!	#NUM!	#NUM!	#NUM!	status=LK
YEL025C	YEL025C		#NUM!	#NUM!	#NUM!	#NUM!	#NUM!	#NUM!	#NUM!	status=LK
YEL028W	YEL028W		#NUM!	#NUM!	#NUM!	#NUM!	#NUM!	#NUM!	#NUM!	status=LK
YEL030W	ECM10		#NUM!	#NUM!	#NUM!	#NUM!	#NUM!	#NUM!	#NUM!	status=LK
YEL031W	SPF1		#NUM!	#NUM!	#NUM!	#NUM!	#NUM!	#NUM!	#NUM!	status=LK
YEL033W	MTC7		#NUM!	#NUM!	#NUM!	#NUM!	#NUM!	#NUM!	#NUM!	status=LK
YEL037C	RAD23		#NUM!	#NUM!	#NUM!	#NUM!	#NUM!	#NUM!	#NUM!	status=LK
YEL038W	UTR4		#NUM!	#NUM!	#NUM!	#NUM!	#NUM!	#NUM!	#NUM!	status=LK
YEL039C	CYC7		#NUM!	#NUM!	#NUM!	#NUM!	#NUM!	#NUM!	#NUM!	status=LK
YEL040W	UTR2		#NUM!	#NUM!	#NUM!	#NUM!	#NUM!	#NUM!	#NUM!	status=LK
YEL041W	YEF1		#NUM!	#NUM!	#NUM!	#NUM!	#NUM!	#NUM!	#NUM!	status=LK
YEL042W	GDA1		#NUM!	#NUM!	#NUM!	#NUM!	#NUM!	#NUM!	#NUM!	status=LK
YEL043W	YEL043W		#NUM!	#NUM!	#NUM!	#NUM!	#NUM!	#NUM!	#NUM!	status=LK
YEL047C	FRD1		#NUM!	#NUM!	#NUM!	#NUM!	#NUM!	#NUM!	#NUM!	status=LK
YEL048C	TCA17		#NUM!	#NUM!	#NUM!	#NUM!	#NUM!	#NUM!	#NUM!	status=LK
YEL049W	PAU2		#NUM!	#NUM!	#NUM!	#NUM!	#NUM!	#NUM!	#NUM!	status=LK
YEL052W	AFG1		#NUM!	#NUM!	#NUM!	#NUM!	#NUM!	#NUM!	#NUM!	status=LK
YEL053C	MAK10		#NUM!	#NUM!	#NUM!	#NUM!	#NUM!	#NUM!	#NUM!	status=LK
YEL056W	HAT2		#NUM!	#NUM!	#NUM!	#NUM!	#NUM!	#NUM!	#NUM!	status=LK
YEL057C	YEL057C		#NUM!	#NUM!	#NUM!	#NUM!	#NUM!	#NUM!	#NUM!	status=LK
YEL059W	YEL059W		#NUM!	#NUM!	#NUM!	#NUM!	#NUM!	#NUM!	#NUM!	status=LK
YEL060C	PRB1		#NUM!	#NUM!	#NUM!	#NUM!	#NUM!	#NUM!	#NUM!	status=LK
YEL061C	CIN8		#NUM!	#NUM!	#NUM!	#NUM!	#NUM!	#NUM!	#NUM!	status=LK
YEL062W	NPR2		#NUM!	#NUM!	#NUM!	#NUM!	#NUM!	#NUM!	#NUM!	status=LK
YEL063C	CAN1		#NUM!	#NUM!	#NUM!	#NUM!	#NUM!	#NUM!	#NUM!	status=LK
YEL064C	AVT2		#NUM!	#NUM!	#NUM!	#NUM!	#NUM!	#NUM!	#NUM!	status=LK
YEL065W	SIT1		#NUM!	#NUM!	#NUM!	#NUM!	#NUM!	#NUM!	#NUM!	status=LK
YEL066W	HPA3		#NUM!	#NUM!	#NUM!	#NUM!	#NUM!	#NUM!	#NUM!	status=LK
YEL067C	YEL067C		#NUM!	#NUM!	#NUM!	#NUM!	#NUM!	#NUM!	#NUM!	status=LK
YEL068C	YEL068C		#NUM!	#NUM!	#NUM!	#NUM!	#NUM!	#NUM!	#NUM!	status=LK
YEL071W	DLD3		#NUM!	#NUM!	#NUM!	#NUM!	#NUM!	#NUM!	#NUM!	status=LK
YER001W	MNN1		#NUM!	#NUM!	#NUM!	#NUM!	#NUM!	#NUM!	#NUM!	status=LK
YER002W	NOP16		#NUM!	#NUM!	#NUM!	#NUM!	#NUM!	#NUM!	#NUM!	status=LK
YER004W	FMP52		#NUM!	#NUM!	#NUM!	#NUM!	#NUM!	#NUM!	#NUM!	status=LK
YER005W	YND1		#NUM!	#NUM!	#NUM!	#NUM!	#NUM!	#NUM!	#NUM!	status=LK
YER007C-A	TMA20		#NUM!	#NUM!	#NUM!	#NUM!	#NUM!	#NUM!	#NUM!	status=LK
YER007W	PAC2		#NUM!	#NUM!	#NUM!	#NUM!	#NUM!	#NUM!	#NUM!	status=LK
YER010C	YER010C		#NUM!	#NUM!	#NUM!	#NUM!	#NUM!	#NUM!	#NUM!	status=LK
YER011W	TIR1		#NUM!	#NUM!	#NUM!	#NUM!	#NUM!	#NUM!	#NUM!	status=LK
YER016W	BIM1		#NUM!	#NUM!	#NUM!	#NUM!	#NUM!	#NUM!	#NUM!	status=LK
YER019C-A	SBH2		#NUM!	#NUM!	#NUM!	#NUM!	#NUM!	#NUM!	#NUM!	status=LK
YER019W	ISC1		#NUM!	#NUM!	#NUM!	#NUM!	#NUM!	#NUM!	#NUM!	status=LK
YER020W	GPA2		#NUM!	#NUM!	#NUM!	#NUM!	#NUM!	#NUM!	#NUM!	status=LK
YER024W	YAT2		#NUM!	#NUM!	#NUM!	#NUM!	#NUM!	#NUM!	#NUM!	status=LK
YER027C	GAL83		#NUM!	#NUM!	#NUM!	#NUM!	#NUM!	#NUM!	#NUM!	status=LK
YER028C	MIG3		#NUM!	#NUM!	#NUM!	#NUM!	#NUM!	#NUM!	#NUM!	status=LK
YER030W	CHZ1		#NUM!	#NUM!	#NUM!	#NUM!	#NUM!	#NUM!	#NUM!	status=LK
YER031C	YPT31		#NUM!	#NUM!	#NUM!	#NUM!	#NUM!	#NUM!	#NUM!	status=LK
YER032W	FIR1		#NUM!	#NUM!	#NUM!	#NUM!	#NUM!	#NUM!	#NUM!	status=LK
YER033C	ZRG8		#NUM!	#NUM!	#NUM!	#NUM!	#NUM!	#NUM!	#NUM!	status=LK
YER034W	YER034W		#NUM!	#NUM!	#NUM!	#NUM!	#NUM!	#NUM!	#NUM!	status=LK
YER035W	EDC2		#NUM!	#NUM!	#NUM!	#NUM!	#NUM!	#NUM!	#NUM!	status=LK
YER038W-A	YER038W-A		#NUM!	#NUM!	#NUM!	#NUM!	#NUM!	#NUM!	#NUM!	status=LK
YER039C	HVG1		#NUM!	#NUM!	#NUM!	#NUM!	#NUM!	#NUM!	#NUM!	status=LK
YER039C-A	YER039C-A		#NUM!	#NUM!	#NUM!	#NUM!	#NUM!	#NUM!	#NUM!	status=LK
YER041W	YEN1		0.87641	0.037	0.98289	0.076	-0.10023	0.037	0.00061	status=JK
YER042W	MXR1		0.97232	0.104	0.93397	0.066	0.02662	0.104	0.00033
YER044C-A	MEI4		0.87331	0.056	0.89209	0.125	-0.04727	0.056	7e-05
YER045C	ACA1		0.86622	0.047	0.99532	0.1	-0.1416	0.047	0.00097	status=JK
YER046W	SPO73		1.04584	0.178	1.11073	0.009	-0.06781	0.178	0.00132
YER046W-A	YER046W-A		0.89105	0.108	0.98815	0.09	-0.08135	0.108	0.00049
YER047C	SAP1		0.93911	0.123	0.92955	0.083	0.03266	0.123	0.00061
YER048C	CAJ1		0.95919	0.044	0.91134	0.004	0.04702	0.044	3e-05
YER049W	TPA1		0.94162	0.015	0.92976	0.046	0.01615	0.015	0
YER051W	JHD1		1.01531	0.018	1.02501	0.012	-0.01119	0.018	0
YER052C	HOM3		0.97359	0.064	0.97116	0.069	0.00101	0.064	8e-05
YER053C	PIC2		1.15869	0.01	1.08558	0.037	0.0757	0.01	3e-05	status=JK
YER054C	GIP2		1.09749	0.098	1.0968	0.013	0.00455	0.097	0.00019
YER055C	HIS1		0.27088	0.021	0.13634	0.012	0.13341	0.021	0.00013
YER056C	FCY2		1.1248	0.079	1.14785	0.084	-0.02814	0.079	0.0001
YER056C-A	RPL34A		0.96837	0.066	0.87199	0.107	0.07214	0.066	9e-05
YER057C	HMF1		0.99686	0.073	1.13577	0.037	-0.14553	0.073	0.00011
YER059W	PCL6		0.98769	0.085	0.95324	0.012	0.03789	0.085	0.00018
YER060W	FCY21		0.99438	0.018	0.96158	0.072	0.03236	0.018	0
YER060W-A	FCY22		1.05374	0.01	1.01762	0.025	0.03821	0.01	3e-05	status=JK
YER061C	CEM1		0.86707	0.034	0.8336	0.047	0.02127	0.034	2e-05
YER062C	HOR2		0.97895	0.043	1.05413	0.042	-0.06802	0.043	2e-05
YER063W	THO1		1.01363	0.046	0.95506	0.038	0.06542	0.046	3e-05
YER064C	VHR2		1.01125	0.04	0.98221	0.055	0.03084	0.04	2e-05
YER065C	ICL1		1.03229	0.089	1.04928	0.071	-0.0028	0.089	0.00017
YER066C-A	YER066C-A		0.95663	0.067	0.98343	0.004	-0.02645	0.067	9e-05
YER066W	RRT13		0.98265	0.031	0.99283	0.018	-0.01345	0.031	1e-05
YER067C-A	YER067C-A		0.98156	0.045	1.00091	0.044	-0.01662	0.045	3e-05
YER067W	RGI1		0.99011	0.016	1.0331	0.086	-0.01825	0.016	9e-05	status=JK
YER069W	ARG5		0.40602	0.04	0.1601	0.007	0.24761	0.04	0.00025
YER071C	TDA2		1.04224	0.035	1.03867	0.042	0.00708	0.035	1e-05
YER072W	VTC1		1.03129	0.019	1.05642	0.046	-0.0245	0.019	0
YER073W	ALD5		1.06343	0.026	1.01817	0.027	0.04568	0.026	0
YER074W	RPS24A		0.67645	0.086	0.53416	0.051	0.14304	0.086	0.00056
YER075C	PTP3		1.00757	0.055	0.99166	0.073	0.00188	0.054	4e-05
YER077C	YER077C		1.02292	0.002	0.98715	0.028	0.04289	0.002	0	status=JK
YER078C	ICP55		0.9328	0.079	0.9394	0.027	-0.01074	0.079	0.00016
YER079W	YER079W		0.97275	0.088	0.959	0.065	0.00448	0.088	0.0002
YER080W	AIM9		1.09269	0.1	0.99757	0.101	0.07598	0.1	0.00021
YER081W	SER3		0.97995	0.014	1.01445	0.023	-0.02734	0.013	6e-05	status=JK
YER083C	GET2		0.8414	0.005	0.868	0.072	-0.03714	0.005	1e-05	status=JK
YER084W	YER084W		0.97181	0.049	0.94617	0.031	0.03483	0.049	4e-05
YER085C	YER085C		1.07192	0.062	1.09812	0.056	-0.03943	0.062	5e-05
YER087C-A	YER087C-A		1.11837	0.041	1.02065	0.051	0.08908	0.041	1e-05
YER088C	DOT6		0.97125	0.033	0.97297	0.076	-0.00538	0.033	1e-05
YER089C	PTC2		0.96463	0.06	0.95657	0.1	0.00852	0.06	6e-05
YER090W	TRP2		0.98608	0.137	1.14762	0.116	-0.16914	0.137	0.00073
YER091C	MET6		1.07102	0.028	0.96736	0.019	0.10471	0.028	0.00023	status=JK
YER091C-A	YER091C-A		1.0518	0.035	1.05589	0.016	0.00036	0.035	1e-05
YER092W	IES5		0.95373	0.049	0.94099	0.034	0.01848	0.049	4e-05
YER093C-A	AIM11		0.79485	0.012	0.6072	0.078	0.20584	0.012	7e-05	status=JK
YER095W	RAD51		0.9471	0.038	0.92342	0.055	0.02599	0.038	2e-05
YER096W	SHC1		0.93296	0.054	1.00132	0.051	-0.07006	0.054	5e-05
YER097W	YER097W		1.01905	0.011	1.02051	0.02	0.00285	0.011	0
YER098W	UBP9		1.00409	0.032	1.0681	0.047	-0.06195	0.032	1e-05
YER101C	AST2		0.99881	0.059	0.98644	0.032	0.01187	0.059	6e-05
YER106W	MAM1		0.92634	0.106	1.00872	0.135	-0.06606	0.105	0.0004
YER108C	YER108C		1.04088	0.168	1.06222	0.075	-0.01759	0.168	0.00113
YER109C	FLO8		1.0409	0.077	1.06038	0.042	-0.02016	0.077	0.00011
YER111C	SWI4		0.89609	0.027	0.81864	0.129	0.07259	0.027	0.00031	status=JK
YER113C	TMN3		1.09045	0.03	1.04841	0.044	0.0529	0.03	1e-05
YER114C	BOI2		1.05578	0.038	1.03471	0.039	0.03025	0.038	1e-05
YER115C	SPR6		1.03044	0.036	1.09255	0.015	-0.05955	0.036	1e-05
YER116C	SLX8		0.46703	0.102	0.25428	0.034	0.20981	0.102	0.00278
YER117W	RPL23B		0.94559	0.013	0.93644	0.1	0.01917	0.013	6e-05	status=JK
YER118C	SHO1		0.9971	0.053	1.02839	0.077	-0.0269	0.053	4e-05
YER119C	AVT6		0.88778	0.225	1.06219	0.098	-0.20118	0.225	0.00427
YER119C-A	YER119C-A		0.93629	0.104	0.90842	0.057	0.03302	0.104	0.00038
YER120W	SCS2		0.80789	0.126	0.86676	0.004	-0.05649	0.126	0.00102
YER121W	YER121W		1.06561	0.111	1.14315	0.019	-0.06925	0.111	0.00031
YER123W	YCK3		0.85353	0.166	0.95963	0.063	-0.09838	0.166	0.00195
YER124C	DSE1		1.03046	0.056	0.98964	0.078	0.02446	0.056	4e-05
YER128W	VFA1		1.02431	0.039	1.02616	0.024	0.00265	0.038	1e-05
YER129W	SAK1		0.93784	0.031	1.03224	0.039	-0.10048	0.031	1e-05
YER130C	YER130C		1.015	0.026	0.97411	0.067	0.02551	0.026	0
YER131W	RPS26B		0.81648	0.09	0.86324	0.128	-0.0239	0.09	0.00036
YER132C	PMD1		1.11418	0.034	1.07351	0.074	0.03204	0.034	1e-05
YER134C	YER134C		1.08404	0.056	0.92238	0.121	0.14786	0.056	0.00088	status=JK
YER135C	YER135C		0.70024	0.036	0.94696	0.168	-0.24724	0.036	0.00089	status=JK
YER137C	YER137C		0.9705	0.14	1.05332	0.101	-0.0769	0.14	0.00082
YER139C	RTR1		0.85493	0.134	0.84439	0.019	0.01155	0.134	0.00105
YER140W	YER140W		0.99651	0.122	1.01373	0.05	-0.01542	0.122	0.0005
YER142C	MAG1		1.04103	0.046	1.01448	0.05	0.0211	0.046	2e-05
YER143W	DDI1		1.0591	0.082	1.13724	0.129	-0.05526	0.082	0.00013
YER144C	UBP5		1.0334	0.11	1.07261	0.13	-0.05145	0.11	0.00033
YER145C	FTR1		1.05684	0.063	1.02281	0.062	0.02463	0.063	6e-05
YER149C	PEA2		1.0142	0.008	0.97516	0.053	0.03848	0.008	0
YER150W	SPI1		0.98412	0.013	1.01688	0.06	-0.04884	0.013	6e-05	status=JK
YER151C	UBP3		0.75662	0.022	0.6633	0.078	0.06966	0.022	0.00029	status=JK
YER152C	YER152C		1.07263	0.069	1.07049	0.005	0.00023	0.068	7e-05
YER153C	PET122		0.86982	0.102	0.86852	0.046	-0.00727	0.102	0.00044
YER155C	BEM2		0.91837	0.059	0.84243	0.029	0.07829	0.059	7e-05
YER156C	YER156C		0.92955	0.071	0.99791	0.071	-0.0677	0.071	0.00012
YER158C	YER158C		1.11445	0.045	1.13264	0.027	-0.02	0.045	2e-05
YER161C	SPT2		0.98104	0.033	0.94984	0.093	0.03959	0.033	1e-05
YER162C	RAD4		0.76653	0.238	0.78476	0.266	-0.03647	0.238	0.00761
YER163C	GCG1		1.04067	0.007	0.99018	0.093	0.06061	0.007	2e-05	status=JK
YER164W	CHD1		1.05149	0.079	1.06067	0.077	-0.01872	0.079	0.00012
YER166W	DNF1		0.95278	0.008	1.03396	0.073	-0.0618	0.008	2e-05	status=JK
YER167W	BCK2		1.05406	0.004	1.01782	0.022	0.04046	0.004	0	status=JK
YER170W	ADK2		1.03722	0.027	1.02481	0.034	0.00918	0.027	0
YER173W	RAD24		1.09278	0.014	0.99702	0.015	0.09385	0.014	0
YER174C	GRX4		1.05269	0.032	1.00423	0.01	0.0443	0.032	1e-05
YER175C	TMT1		0.96502	0.043	0.96885	0.008	-0.00625	0.043	2e-05
YER176W	ECM32		0.96161	0.063	0.98633	0.022	-0.02252	0.063	8e-05
YER177W	BMH1		0.8534	0.041	0.83704	0.055	0.00521	0.041	0.00076	status=JK
YER178W	PDA1		0.8901	0.01	0.774	0.052	0.10844	0.01	4e-05	status=JK
YER179W	DMC1		0.96774	0.046	0.93803	0.057	0.02248	0.046	3e-05
YER180C	ISC10		0.99089	0.019	1.04603	0.028	-0.06363	0.019	0
YER181C	YER181C		0.99434	0.023	0.98821	0.032	0.00367	0.023	0
YER182W	FMP10		1.00055	0.017	0.93465	0.024	0.07646	0.017	0
YER183C	FAU1		1.00634	0.02	1.04222	0.067	-0.03328	0.02	0.00014	status=JK
YER184C	YER184C		0.98419	0.103	1.08434	0.038	-0.10093	0.103	0.00032
YER185W	PUG1		1.0806	0.071	1.01794	0.029	0.06138	0.071	0.00144	status=JK
YER186C	YER186C		1.01096	0.066	0.96531	0.026	0.06001	0.065	7e-05
YER187W	YER187W		1.05189	0.053	1.05042	0.024	-0.0059	0.053	4e-05
YER188W	YER188W		1.05451	0.07	0.99171	0.057	0.05399	0.07	8e-05
YFL001W	DEG1		0.78393	0.107	0.67565	0.075	0.09857	0.107	0.00069
YFL003C	MSH4		0.91171	0.045	0.96473	0.001	-0.05279	0.045	3e-05
YFL004W	VTC2		1.00352	0.042	0.96957	0.035	0.03613	0.042	2e-05
YFL006W	YFL006W		0.92207	0.153	0.94807	0.083	-0.0219	0.152	0.00122
YFL007W	BLM10		1.03412	0.045	0.95738	0.055	0.06141	0.045	2e-05
YFL010C	WWM1		0.02507	0.043	1.0356	0.129	-1.01947	0.043	0.42265	status=JK
YFL010W-A	AUA1		1.11826	0.028	1.07293	0.036	0.03925	0.028	0.00021	status=JK
YFL011W	HXT10		1.00886	0.025	1.0034	0.07	-0.00996	0.025	0.0002	status=JK
YFL012W	YFL012W		1.05231	0.029	1.05372	0.052	0.0089	0.029	1e-05
YFL013C	IES1		0.99672	0.082	0.89387	0.041	0.12303	0.082	0.00015
YFL013W-A	YFL013W-A		0.91823	0.029	0.8609	0.047	0.05347	0.029	1e-05
YFL014W	HSP12		1.06081	0.015	1.12555	0.031	-0.06232	0.015	0
YFL015C	YFL015C		1.04423	0.03	1.10279	0.051	-0.03342	0.03	0.00027	status=JK
YFL018C	LPD1		0.85787	0.139	0.83789	0.027	0.03113	0.139	0.00114
YFL019C	YFL019C		0.8869	0.018	1.02121	0.038	-0.12549	0.018	0.00014	status=JK
YFL020C	PAU5		1.0341	0.085	1.08792	0.061	-0.0412	0.084	0.00015
YFL021W	GAT1		1.09623	0.073	1.07039	0.072	0.01792	0.073	8e-05
YFL023W	BUD27		0.68906	0.105	0.78386	0.052	-0.08662	0.105	0.00096
YFL025C	BST1		1.07314	0.064	1.09106	0.125	-0.02629	0.064	6e-05
YFL026W	STE2		0	0	0	0	0	0	#NUM!
YFL027C	GYP8		1.0497	0.007	1.02797	0.049	0.03077	0.007	1e-05	status=JK
YFL028C	CAF16		1.019	0.011	1.02785	0.031	-0.00811	0.011	0
YFL030W	AGX1		0.97868	0.009	0.95104	0.091	0.01761	0.009	0
YFL031W	HAC1		0.95536	0.04	0.92216	0.017	0.03574	0.04	2e-05
YFL032W	YFL032W		0.94786	0.084	0.96439	0.038	-0.01932	0.084	0.00019
YFL033C	RIM15		1.09601	0.057	1.06491	0.071	0.02618	0.057	4e-05
YFL034C-A	RPL22B		1.09917	0.055	1.04055	0.078	0.04862	0.055	4e-05
YFL034W	YFL034W		1.04604	0.128	1.00395	0.066	0.05432	0.128	0.0005
YFL035C-B	YFL035C-B		1.05526	0.047	1.02282	0.07	0.03859	0.047	2e-05
YFL036W	RPO41		0.92729	0.062	0.88267	0.006	0.0453	0.061	8e-05
YFL040W	YFL040W		1.02448	0.067	0.9876	0.04	0.05002	0.067	8e-05
YFL041W	FET5		1.10231	0.053	1.08213	0.042	0.02923	0.053	3e-05
YFL042C	YFL042C		1.02845	0.011	1.05711	0.042	-0.01718	0.011	4e-05	status=JK
YFL043C	YFL043C		0.97613	0.014	1.04471	0.017	-0.06702	0.014	0
YFL044C	OTU1		0.99399	0.03	0.9929	0.058	0.00432	0.03	1e-05
YFL046W	FMP32		0.97667	0.061	0.95512	0.073	-0.00122	0.061	7e-05
YFL047W	RGD2		0.98294	0.052	1.00148	0.054	-0.03048	0.052	0.00093	status=JK
YFL048C	EMP47		1.13348	0.058	1.0204	0.095	0.12066	0.058	0.00089	status=JK
YFL049W	SWP82		1.07269	0.203	1.04787	0.117	0.0295	0.203	0.00181
YFL050C	ALR2		1.00188	0.176	0.97839	0.035	0.02674	0.176	0.00145
YFL051C	YFL051C		0.88764	0.164	0.93044	0.048	-0.03034	0.164	0.00168
YFL052W	YFL052W		0.97979	0.067	0.98809	0.02	-0.01037	0.067	9e-05
YFL053W	DAK2		1.00978	0.023	1.04696	0.031	-0.03514	0.023	0
YFL054C	YFL054C		1.04995	0.089	1.10846	0.051	-0.07138	0.088	0.00016
YFL055W	AGP3		1.00423	0.018	1.04624	0.005	-0.03875	0.018	0
YFL056C	AAD6		1.02452	0.023	0.9396	0.112	0.06375	0.023	0
YFL063W	YFL063W		1.01614	0.011	1.06719	0.065	-0.03858	0.011	4e-05	status=JK
YFR006W	YFR006W		1.05567	0.01	1.03735	0.033	0.01806	0.01	0
YFR007W	YFH7		1.02194	0.008	1.0444	0.006	-0.02353	0.008	2e-05	status=JK
YFR008W	FAR7		1.10622	0.062	1.07686	0.027	0.03159	0.062	5e-05
YFR009W	GCN20		0.83066	0.114	0.97127	0.027	-0.1345	0.114	0.0007
YFR010W	UBP6		0.64528	0.038	0.64713	0.078	-0.00359	0.038	0.00116	status=JK
YFR011C	AIM13		0.94572	0.213	0.88719	0.058	0.08362	0.212	0.00299
YFR012W	DCV1		0.9909	0.041	1.04229	0.051	-0.05161	0.041	2e-05
YFR013W	IOC3		0.99097	0.055	1.03613	0.017	-0.03757	0.055	5e-05
YFR014C	CMK1		1.03688	0.013	1.05505	0.054	-0.00788	0.013	0
YFR015C	GSY1		1.03259	0.07	1.06377	0.103	-0.01564	0.07	9e-05
YFR016C	YFR016C		1.0021	0.028	0.99306	0.052	0.0224	0.028	1e-05
YFR017C	IGD1		0.97566	0.001	0.95576	0.051	0.01961	0.001	0	status=JK
YFR018C	YFR018C		1.03647	0.06	1.00481	0.04	0.0442	0.06	5e-05
YFR019W	FAB1		0.67866	0.066	0.65744	0.066	0.0404	0.065	0.00025
YFR020W	YFR020W		1.11706	0.048	1.03919	0.023	0.08997	0.048	2e-05
YFR021W	ATG18		0.9026	0.033	0.88857	0.073	0.03312	0.033	1e-05
YFR022W	ROG3		1.01854	0.022	1.08458	0.024	-0.06917	0.022	0
YFR023W	PES4		1.00479	0.05	0.99827	0.01	0.00372	0.05	3e-05
YFR024C	YFR024C		1.00887	0.036	0.95025	0.106	0.07952	0.036	1e-05
YFR024C-A	LSB3		1.07191	0.057	1.02193	0.03	0.05449	0.057	4e-05
YFR025C	HIS2		0.35549	0.051	0.1448	0.009	0.20817	0.051	0.00082
YFR026C	ULI1		1.04211	0.012	1.05547	0.003	-0.01284	0.012	0
YFR030W	MET10		0.99592	0.008	1.04257	0.041	-0.05028	0.008	0
YFR031C-A	RPL2A		0.95104	0.013	0.9859	0.084	-0.03002	0.012	6e-05	status=JK
YFR032C	RRT5		1.02947	0.025	1.05488	0.085	-0.00733	0.025	0.00019	status=JK
YFR032C-A	RPL29		0.96794	0.056	0.89277	0.014	0.07647	0.056	5e-05
YFR033C	QCR6		0.91168	0.037	0.89175	0.059	0.015	0.037	2e-05
YFR034C	PHO4		0.98489	0.007	0.99876	0.031	-0.0085	0.007	2e-05	status=JK
YFR035C	YFR035C		1.01089	0.004	0.95034	0.039	0.07525	0.004	0	status=JK
YFR038W	IRC5		0.98533	0.014	1.01853	0.049	-0.0204	0.014	7e-05	status=JK
YFR039C	YFR039C		0.99949	0.035	1.03416	0.024	-0.02942	0.035	1e-05
YFR040W	SAP155		1.01935	0.023	1.07922	0.037	-0.06737	0.023	0
YFR041C	ERJ5		1.05026	0.034	1.00998	0.053	0.02463	0.034	0.00035	status=JK
YFR043C	IRC6		1.03222	0.022	1.06402	0.056	-0.03722	0.022	0
YFR044C	DUG1		1.06766	0.013	1.10914	0.036	-0.03198	0.013	5e-05	status=JK
YFR045W	YFR045W		0.96288	0.057	1.08517	0.069	-0.10979	0.057	6e-05
YFR046C	CNN1		1.05086	0.065	1.07059	0.002	-0.01799	0.065	6e-05
YFR047C	BNA6		0.98885	0.039	0.92651	0.015	0.06347	0.038	2e-05
YFR048W	RMD8		0.97524	0.01	0.94234	0.059	0.03074	0.01	0
YFR049W	YMR31		1.03669	0.007	1.03461	0.011	0.00223	0.007	1e-05	status=JK
YFR053C	HXK1		0.99104	0.054	0.97637	0.03	0.01315	0.054	4e-05
YFR054C	YFR054C		1.00105	0.032	1.01222	0.048	-0.00975	0.032	1e-05
YFR055W	IRC7		1.03277	0.019	1.0017	0.017	0.0285	0.019	0
YFR056C	YFR056C		0.98834	0.047	1.01761	0.039	-0.02314	0.047	3e-05
YFR057W	YFR057W		1.06115	0.035	1.06772	0.031	-0.00767	0.035	1e-05
YGL002W	ERP6		1.00257	0.078	1.01706	0.005	-0.01407	0.078	0.00013
YGL004C	RPN14		1.06372	0.016	0.95575	0.017	0.11035	0.016	7e-05	status=JK
YGL005C	COG7		0.90425	0.068	0.84007	0.073	0.07992	0.068	0.00012
YGL006W	PMC1		1.04704	0.018	1.07072	0.055	-0.01126	0.018	0
YGL007W	YGL007W		0.82586	0.006	0.97878	0.011	-0.15774	0.006	0
YGL009C	LEU1		0.72115	0.066	0.22278	0.01	0.49743	0.066	0.00021
YGL010W	YGL010W		1.0758	0.04	1.03556	0.077	0.0467	0.04	1e-05
YGL013C	PDR1		1.00784	0.039	1.00712	0.019	0.00278	0.039	2e-05
YGL014W	PUF4		1.05635	0.048	1.08981	0.042	-0.04069	0.048	3e-05
YGL015C	YGL015C		1.01814	0.003	0.99685	0.062	0.0101	0.003	0
YGL016W	KAP122		0.8449	0.108	0.70733	0.099	0.16015	0.108	0.00057
YGL017W	ATE1		1.00746	0.034	1.02031	0.072	-0.02742	0.034	0.00037	status=JK
YGL019W	CKB1		0.90729	0.012	0.81872	0.098	0.0707	0.012	6e-05	status=JK
YGL020C	GET1		0.84811	0.084	0.98203	0.067	-0.12191	0.083	0.00026
YGL021W	ALK1		1.01027	0.066	0.99165	0.066	0.0252	0.066	8e-05
YGL023C	PIB2		1.0843	0.075	1.05815	0.086	0.02248	0.074	9e-05
YGL024W	YGL024W		1.06946	0.123	0.96028	0.024	0.11483	0.123	0.00042
YGL026C	TRP5		0	0	0	0	0	0	#NUM!
YGL027C	CWH41		0.99538	0.015	1.03379	0.061	-0.02526	0.015	0
YGL028C	SCW11		1.02596	0.018	1.11154	0.063	-0.10027	0.018	0
YGL029W	CGR1		0.9844	0.064	0.87417	0.021	0.1145	0.064	8e-05
YGL031C	RPL24A		0.78738	0.046	0.86373	0.046	-0.06452	0.046	5e-05
YGL032C	AGA2		1.06186	0.022	1.09454	0.07	-0.03681	0.021	0
YGL034C	YGL034C		1.0254	0.098	1.05548	0.019	-0.03324	0.098	0.00024
YGL035C	MIG1		1.02011	0.065	1.01207	0.013	0.01191	0.065	7e-05
YGL036W	YGL036W		0.94939	0.103	0.94123	0.048	0.00405	0.103	0.00035
YGL037C	PNC1		1.02339	0.041	1.0201	0.044	-0.00968	0.041	2e-05
YGL039W	YGL039W		1.06675	0.114	1.00977	0.024	0.04935	0.114	0.00033
YGL041C	YGL041C		0.948	0.001	0.95712	0.063	0.00374	0.001	0	status=JK
YGL042C	YGL042C		0.95969	0.135	0.9263	0.019	0.03881	0.135	0.00076
YGL043W	DST1		0.8898	0.039	0.6056	0.023	0.27905	0.039	2e-05
YGL045W	RIM8		0	0	0	0	0	0	#NUM!
YGL046W	YGL046W		0.92196	0.036	0.87148	0.037	0.05584	0.036	2e-05
YGL049C	TIF4632		1.10364	0.049	1.08455	0.127	0.02996	0.049	2e-05
YGL050W	TYW3		1.00987	0.017	1.00627	0.044	-0.00126	0.017	9e-05	status=JK
YGL051W	MST27		1.02452	0.044	0.97155	0.134	0.02281	0.044	2e-05
YGL053W	PRM8		1.05048	0.08	1.10473	0.063	-0.05043	0.08	0.00012
YGL054C	ERV14		0.76261	0.047	0.96409	0.076	-0.21102	0.047	6e-05
YGL056C	SDS23		0.84071	0.215	0.91246	0.166	-0.10381	0.215	0.00437
YGL057C	GEP7		0.82504	0.09	0.73409	0.215	0.07544	0.09	0.00036
YGL058W	RAD6		1.05439	0.028	1.01464	0.02	0.04297	0.028	0.00024	status=JK
YGL059W	PKP2		1.04663	0.044	1.11633	0.094	-0.05194	0.044	0.0006	status=JK
YGL060W	YBP2		0.96237	0.111	1.03317	0.076	-0.07007	0.111	0.00042
YGL062W	PYC1		0.96569	0.081	0.94577	0.02	0.01531	0.081	0.00016
YGL063W	PUS2		0.98091	0.097	0.95403	0.106	-0.00346	0.097	0.00027
YGL066W	SGF73		0.94764	0.069	0.64739	0.061	0.30325	0.069	0.0001
YGL067W	NPY1		1.05682	0.027	1.0427	0.079	0.02018	0.027	0.00022	status=JK
YGL071W	AFT1		1.05879	0.034	1.05887	0.102	-0.01556	0.034	1e-05
YGL077C	HNM1		0.9648	0.021	0.9224	0.062	0.04443	0.02	0
YGL078C	DBP3		0.86322	0.025	0.89571	0.009	-0.03552	0.025	1e-05
YGL079W	KXD1		0.99956	0.017	0.97341	0.006	0.02786	0.017	9e-05	status=JK
YGL080W	FMP37		0.94765	0.038	0.8277	0.055	0.12894	0.038	2e-05
YGL081W	YGL081W		1.03997	0.062	1.0308	0.092	0.0389	0.062	6e-05
YGL082W	YGL082W		1.00032	0.018	1.07141	0.089	-0.06512	0.018	0.00011	status=JK
YGL083W	SCY1		1.04025	0.026	1.08123	0.034	-0.03772	0.026	0
YGL084C	GUP1		0.92451	0.066	0.98599	0.107	-0.07395	0.066	0.0001
YGL085W	LCL3		1.0399	0.007	0.99277	0.023	0.05307	0.007	1e-05	status=JK
YGL086W	MAD1		0.98243	0.038	0.94726	0.023	0.03552	0.038	2e-05
YGL087C	MMS2		0.9532	0.06	0.96291	0.01	-0.01118	0.06	7e-05
YGL089C	MF(ALPHA)2		1.04454	0.011	1.09277	0.029	-0.04538	0.011	0
YGL090W	LIF1		1.05282	0.041	1.0186	0.048	0.04489	0.041	2e-05
YGL094C	PAN2		1.00988	0.078	1.00911	0.018	-0.00763	0.078	0.00013
YGL096W	TOS8		0.99679	0.039	0.98635	0.05	0.01873	0.039	2e-05
YGL101W	YGL101W		1.01988	0.005	1.04207	0.046	-0.00951	0.005	1e-05	status=JK
YGL104C	VPS73		0.98375	0.009	0.99734	0.025	-0.02267	0.009	3e-05	status=JK
YGL105W	ARC1		0	0	0.02541	0.044	0	0	#NUM!
YGL108C	YGL108C		1.05279	0.026	1.11312	0.015	-0.0669	0.026	0
YGL109W	YGL109W		0.95941	0.048	0.98645	0.046	-0.0379	0.048	3e-05
YGL110C	CUE3		0.98684	0.038	0.98034	0.037	0.0174	0.038	2e-05
YGL114W	YGL114W		0.96994	0.046	1.01815	0.039	-0.05716	0.046	3e-05
YGL115W	SNF4		0.78788	0.117	0.70655	0.064	0.08224	0.117	0.00089
YGL117W	YGL117W		1.06156	0.006	1.0478	0.078	0.02366	0.006	0
YGL118C	YGL118C		1.02632	0.018	1.02597	0.042	0.01092	0.018	0.00011	status=JK
YGL121C	GPG1		1.01834	0.036	1.07391	0.023	-0.04772	0.036	1e-05
YGL124C	MON1		0.84241	0.027	0.96423	0.025	-0.13374	0.027	1e-05
YGL125W	MET13		0.99197	0.037	0.97938	0.012	0.01765	0.037	0.00045	status=JK
YGL126W	SCS3		0.99987	0.019	0.95097	0.076	0.0362	0.019	0.00012	status=JK
YGL127C	SOH1		0.51711	0.032	0.21516	0.003	0.3006	0.032	6e-05
YGL131C	SNT2		1.02823	0.002	1.08549	0.031	-0.06238	0.002	0	status=JK
YGL132W	YGL132W		1.07711	0.064	1.0017	0.039	0.06747	0.064	6e-05
YGL133W	ITC1		0.9885	0.029	1.01136	0.063	-0.01949	0.029	1e-05
YGL136C	MRM2		0.44849	0.269	0.38223	0.124	0.0848	0.268	0.0444
YGL138C	YGL138C		1.0073	0.006	1.06677	0.055	-0.05339	0.006	1e-05	status=JK
YGL139W	FLC3		1.01168	0.038	1.04364	0.01	-0.03045	0.038	2e-05
YGL140C	YGL140C		0.99626	0.054	1.06727	0.027	-0.06395	0.054	4e-05
YGL141W	HUL5		1.04747	0.065	1.09272	0.093	-0.04649	0.065	7e-05
YGL144C	ROG1		1.01739	0.014	1.02017	0.061	0.01045	0.014	6e-05	status=JK
YGL146C	RRT6		0.99478	0.066	0.97861	0.054	0.03501	0.066	8e-05
YGL147C	RPL9A		0.91977	0.057	0.96147	0.032	-0.03216	0.056	6e-05
YGL148W	ARO2		0.8601	0.03	0.82515	0.046	0.03739	0.03	1e-05
YGL149W	YGL149W		0.84618	0.018	1.09085	0.05	-0.24505	0.018	0
YGL151W	NUT1		0.75554	0.079	0.89864	0.038	-0.14038	0.078	0.00031
YGL152C	YGL152C		1.05598	0.025	1.03428	0.085	0.03951	0.025	0.00018	status=JK
YGL153W	PEX14		1.11013	0.012	1.03331	0.006	0.07842	0.012	4e-05	status=JK
YGL154C	LYS5		0.32268	0.043	0.17279	0.014	0.15167	0.043	0.00066
YGL156W	AMS1		0.99721	0.006	1.02817	0.031	-0.02864	0.006	0
YGL157W	ARI1		1.01236	0.053	1.02883	0.079	-0.01698	0.053	4e-05
YGL158W	RCK1		1.04066	0.06	0.97991	0.045	0.0675	0.06	5e-05
YGL159W	YGL159W		1.10626	0.037	1.0855	0.097	0.0052	0.037	1e-05
YGL160W	AIM14		0.92328	0.059	0.90055	0.059	0.03414	0.058	7e-05
YGL161C	YIP5		0.99701	0.057	1.01202	0.039	-0.01815	0.057	5e-05
YGL162W	SUT1		0.99532	0.043	1.00851	0.026	-0.01871	0.043	2e-05
YGL163C	RAD54		1.01761	0.049	1.08572	0.023	-0.05755	0.049	3e-05
YGL164C	YRB30		1.04818	0.029	1.06103	0.087	-0.03951	0.029	1e-05
YGL165C	YGL165C		1.02577	0.01	1.03115	0.028	-0.00309	0.01	0
YGL166W	CUP2		1.00646	0.009	1.06038	0.053	-0.03956	0.009	2e-05	status=JK
YGL167C	PMR1		0.69901	0.052	0.6794	0.092	0.04127	0.052	0.00011
YGL168W	HUR1		0.51443	0.072	0.57894	0.067	-0.06467	0.072	0.00073
YGL170C	SPO74		0.9652	0.08	0.95663	0.029	0.02175	0.08	0.00016
YGL173C	XRN1		0.39245	0.077	0.28922	0.043	0.09993	0.076	0.00198
YGL174W	BUD13		0.63286	0.026	0.88014	0.033	-0.24816	0.026	0.00056	status=JK
YGL175C	SAE2		0.81861	0.019	1.01626	0.037	-0.19473	0.019	0.00018	status=JK
YGL176C	YGL176C		1.19194	0.047	1.07635	0.134	0.11808	0.047	2e-05
YGL177W	YGL177W		1.22046	0.121	1.20691	0.119	0.03642	0.12	0.00026
YGL179C	TOS3		1.14162	0.079	1.05648	0.036	0.10113	0.079	9e-05
YGL180W	ATG1		1.0303	0.076	0.90822	0.041	0.10527	0.076	0.00011
YGL181W	GTS1		1.02411	0.047	1.04805	0.034	-0.00852	0.047	3e-05
YGL194C	HOS2		0.65832	0.016	0.56188	0.054	0.09582	0.016	0.0002	status=JK
YGL195W	GCN1		0.8601	0.054	0.96776	0.043	-0.0986	0.054	7e-05
YGL196W	DSD1		0.83479	0.126	1.0625	0.015	-0.21819	0.126	0.00093
YGL197W	MDS3		0.76202	0.153	0.78582	0.109	-0.00419	0.153	0.00215
YGL198W	YIP4		0.90675	0.2	1.18869	0.016	-0.27726	0.2	0.00284
YGL199C	YGL199C		1.03174	0.134	1.01416	0.127	0.02878	0.134	0.00059
YGL202W	ARO8		0.92294	0.09	1.06126	0.083	-0.1588	0.09	0.00025
YGL203C	KEX1		0.96832	0.023	1.03491	0.023	-0.07601	0.023	0.00019	status=JK
YGL205W	POX1		0.96379	0.03	1.01571	0.046	-0.04554	0.03	1e-05
YGL208W	SIP2		0.96278	0.039	1.03601	0.051	-0.07569	0.039	2e-05
YGL209W	MIG2		0.99232	0.019	1.00494	0.016	-0.01297	0.019	0
YGL210W	YPT32		1.04123	0.054	1.00311	0.011	0.04385	0.054	4e-05
YGL211W	NCS6		0.923	0.034	0.76349	0.028	0.15461	0.034	1e-05
YGL212W	VAM7		0.78529	0.033	0.87449	0.08	-0.08637	0.033	2e-05
YGL213C	SKI8		0.90223	0.019	0.94016	0.037	-0.03487	0.019	0
YGL214W	YGL214W		0.05151	0.06	0.45075	0.261	-0.36208	0.06	0.18437
YGL215W	CLG1		0.9996	0.079	0.90436	0.1	0.09117	0.079	0.00014
YGL216W	KIP3		1.02874	0.026	0.99977	0.007	0.03238	0.026	0
YGL217C	YGL217C		0.97117	0.074	0.94887	0.046	0.01149	0.074	0.00012
YGL218W	YGL218W		0.67907	0.104	0.57436	0.041	0.09936	0.104	0.00096
YGL219C	MDM34		0.93801	0.023	0.83761	0.045	0.10783	0.023	0
YGL221C	NIF3		1.0025	0.015	1.02985	0.037	-0.02621	0.015	0
YGL222C	EDC1		1.00659	0.007	1.00951	0.031	0.00146	0.007	0
YGL224C	SDT1		1.01294	0.032	1.0003	0.044	0.01061	0.032	1e-05
YGL226C-A	OST5		1.05222	0.029	1.04236	0.058	0.01735	0.029	1e-05
YGL226W	MTC3		0.98365	0.07	0.91689	0.093	0.05868	0.07	0.0001
YGL227W	VID30		0.98411	0.02	0.9961	0.028	-0.0141	0.02	0
YGL228W	SHE10		1.01978	0.019	1.05372	0.039	-0.04021	0.019	0
YGL229C	SAP4		1.05689	0.057	1.05979	0.024	-0.01426	0.057	4e-05
YGL230C	YGL230C		1.00128	0.027	0.9583	0.109	0.01372	0.027	0.00025	status=JK
YGL231C	EMC4		1.04015	0.023	1.06573	0.012	-0.0237	0.023	0
YGL232W	TAN1		1.0468	0.027	1.02003	0.013	0.03034	0.027	0
YGL234W	ADE5		1.03284	0.009	1.04281	0.033	-0.01534	0.009	0
YGL235W	YGL235W		0.93149	0.001	0.83946	0.034	0.07458	0.001	0	status=JK
YGL236C	MTO1		0.95428	0.068	0.77508	0.077	0.18193	0.068	0.0001
YGL237C	HAP2		0.73433	0.049	0.73389	0.093	-0.00488	0.049	8e-05
YGL241W	KAP114		1.04793	0.037	1.04171	0.031	0.00804	0.037	1e-05
YGL242C	YGL242C		1.04683	0.053	1.09781	0.031	-0.05589	0.053	3e-05
YGL243W	TAD1		0.9902	0.019	0.94346	0.037	0.05706	0.019	0
YGL244W	RTF1		0.78973	0.068	0.62248	0.095	0.14636	0.068	0.00017
YGL248W	PDE1		1.03129	0.085	1.05116	0.034	-0.01875	0.085	0.00016
YGL249W	ZIP2		1.03334	0.008	0.93616	0.048	0.0978	0.008	2e-05	status=JK
YGL250W	RMR1		1.00426	0.056	0.96118	0.075	0.03428	0.056	5e-05
YGL251C	HFM1		1.02507	0.002	1.03325	0.024	-0.01328	0.002	0	status=JK
YGL252C	RTG2		0.44335	0.014	0.36851	0.042	0.08357	0.013	1e-05
YGL253W	HXK2		0.99903	0.012	1.12392	0.064	-0.10675	0.012	5e-05	status=JK
YGL254W	FZF1		0.93298	0.042	1.02022	0.126	-0.07872	0.041	0.00066	status=JK
YGL255W	ZRT1		0.89767	0.033	0.91038	0.051	-0.00632	0.033	1e-05
YGL256W	ADH4		1.02193	0.041	1.07155	0.068	-0.04422	0.041	2e-05
YGL257C	MNT2		1.00692	0.003	1.01462	0.028	-0.00338	0.003	0	status=JK
YGL258W	VEL1		1.01689	0.028	1.01823	0.013	0.004	0.028	1e-05
YGL259W	YPS5		1.00581	0.007	1.0352	0.021	-0.03359	0.007	0
YGL260W	YGL260W		1.00727	0.041	0.96904	0.086	0.04058	0.041	2e-05
YGL261C	PAU11		0.99803	0.008	1.01774	0.067	-0.01548	0.008	0
YGL262W	YGL262W		1.01433	0.011	0.99023	0.051	0.02158	0.011	0
YGL263W	COS12		1.01002	0	1.00288	0.054	0.01496	0	0	status=JK
YGR001C	YGR001C		0.94492	0.152	1.00563	0.099	-0.07916	0.152	0.00113
YGR003W	CUL3		1.00989	0.015	1.08816	0.04	-0.069	0.015	7e-05	status=JK
YGR004W	PEX31		0.99319	0.06	1.01089	0.006	-0.01843	0.06	6e-05
YGR007W	ECT1		1.02864	0.011	1.0519	0.041	-0.02333	0.011	4e-05	status=JK
YGR008C	STF2		1.01471	0.033	1.01791	0	-0.00198	0.033	1e-05
YGR010W	NMA2		1.00723	0.004	0.9889	0.014	0.01606	0.004	0	status=JK
YGR011W	YGR011W		0.99498	0.017	0.97688	0.005	0.01961	0.017	0
YGR012W	YGR012W		1.00501	0.014	1.05991	0.032	-0.0479	0.014	0
YGR014W	MSB2		0.99911	0.026	1.01042	0.112	-0.03359	0.026	0
YGR015C	YGR015C		1.04068	0.066	1.06221	0.087	-0.01478	0.066	7e-05
YGR016W	YGR016W		0.97962	0.133	1.01527	0.094	-0.03175	0.132	0.00067
YGR017W	YGR017W		0.993	0.07	1.03991	0.064	-0.0455	0.07	0.0001
YGR018C	YGR018C		0.88379	0.185	1.08449	0.067	-0.19763	0.184	0.00242
YGR019W	UGA1		1.11337	0.029	1.11127	0.049	0.00117	0.029	0.00023	status=JK
YGR021W	YGR021W		1.03324	0.08	1.00678	0.059	0.01608	0.08	0.00013
YGR022C	YGR022C		0.96844	0.025	0.92769	0.024	0.03618	0.025	0
YGR023W	MTL1		1.0199	0.03	0.98586	0.068	0.02986	0.03	1e-05
YGR025W	YGR025W		0.97411	0.025	0.974	0.066	0.00165	0.025	0
YGR026W	YGR026W		1.01044	0.009	0.98761	0.008	0.02583	0.009	0
YGR027C	RPS25A		0.87125	0.051	0.86438	0.067	-0.00971	0.051	6e-05
YGR028W	MSP1		1.00679	0.047	1.03013	0.02	-0.01087	0.047	3e-05
YGR031W	IMO32		1.02412	0.029	0.8738	0.109	0.12865	0.029	1e-05
YGR032W	GSC2		1.03718	0.069	1.06103	0.044	-0.02396	0.069	8e-05
YGR033C	TIM21		0.94593	0.121	1.00682	0.028	-0.05489	0.121	0.00057
YGR034W	RPL26B		1.03159	0.144	1.14289	0.039	-0.099	0.144	0.00073
YGR035C	YGR035C		1.0051	0.038	1.05961	0.071	-0.06281	0.038	2e-05
YGR037C	ACB1		0.97182	0.009	0.88882	0.031	0.09245	0.009	3e-05	status=JK
YGR038W	ORM1		0.93855	0.067	0.89208	0.077	0.03474	0.067	0.0001
YGR039W	YGR039W		1.0279	0.075	1.03116	0.114	-0.02924	0.075	0.00011
YGR040W	KSS1		0.97255	0.025	1.06407	0.055	-0.07761	0.025	0
YGR041W	BUD9		0.96734	0.008	0.98526	0.054	-0.01138	0.008	2e-05	status=JK
YGR042W	YGR042W		0.97686	0.029	0.93567	0.104	0.03541	0.029	1e-05
YGR043C	NQM1		1.0708	0.029	1.02065	0.087	0.04622	0.029	1e-05
YGR044C	RME1		1.07003	0.029	1.03696	0.017	0.03006	0.029	1e-05
YGR045C	YGR045C		1.08785	0.004	1.05815	0.035	0.03281	0.004	1e-05	status=JK
YGR049W	SCM4		1.06722	0.037	1.04068	0.057	0.03353	0.037	1e-05
YGR050C	YGR050C		1.07242	0.075	1.08352	0.059	0.00094	0.075	9e-05
YGR051C	YGR051C		1.09419	0.014	1.14613	0.016	-0.05249	0.014	6e-05	status=JK
YGR052W	FMP48		1.02804	0.097	1.10847	0.071	-0.07489	0.097	0.00023
YGR053C	YGR053C		1.00242	0.019	1.01541	0.015	-0.00516	0.019	0
YGR054W	YGR054W		1.05273	0.004	1.03021	0.033	0.03005	0.004	0	status=JK
YGR055W	MUP1		0.87547	0.092	0.92262	0.083	-0.06458	0.092	0.00032
YGR058W	PEF1		0.97368	0.018	0.97353	0.02	0.00546	0.018	0
YGR059W	SPR3		1.01139	0.063	1.024	0.04	-0.00523	0.063	7e-05
YGR061C	ADE6		0.98373	0.028	1.05887	0.111	-0.06514	0.028	0.00027	status=JK
YGR066C	YGR066C		1.03213	0.015	1.01214	0.055	0.01901	0.015	0
YGR067C	YGR067C		1.04842	0.003	1.08632	0.028	-0.04034	0.003	0	status=JK
YGR068C	ART5		0.95299	0.022	1.08561	0.081	-0.12698	0.022	0.00018	status=JK
YGR069W	YGR069W		1.01272	0.028	1.0289	0.051	-0.01533	0.028	1e-05
YGR070W	ROM1		1.00388	0.043	1.06575	0.037	-0.05418	0.043	2e-05
YGR071C	ENV11		0.96304	0.034	0.94305	0.042	0.02088	0.034	1e-05
YGR072W	UPF3		0.95149	0.052	0.957	0.062	0.00973	0.052	4e-05
YGR077C	PEX8		0.98828	0.005	0.96125	0.022	0.02385	0.005	1e-05	status=JK
YGR078C	PAC10		0.82883	0.076	0.6856	0.026	0.13856	0.076	0.00021
YGR079W	YGR079W		0.93431	0.072	0.95984	0.04	-0.02404	0.072	0.00012
YGR080W	TWF1		1.01215	0.011	1.01054	0.02	0.00096	0.011	4e-05	status=JK
YGR081C	SLX9		0.58044	0.03	0.79216	0.013	-0.21149	0.03	4e-05
YGR084C	MRP13		1.00158	0.004	1.01236	0.041	-0.01529	0.004	1e-05	status=JK
YGR085C	RPL11B		0.87288	0.007	0.93365	0.017	-0.06009	0.007	0
YGR086C	PIL1		1.01303	0.023	1.07936	0.011	-0.06522	0.023	0
YGR087C	PDC6		1.0022	0.034	1.08679	0.01	-0.08448	0.034	1e-05
YGR088W	CTT1		1.01221	0.113	1.08494	0.072	-0.08591	0.113	0.00038
YGR089W	NNF2		1.04125	0.06	1.01835	0.079	0.02258	0.06	5e-05
YGR092W	DBF2		0.72514	0.058	0.50299	0.07	0.239	0.058	0.00014
YGR093W	YGR093W		1.03132	0.036	0.98859	0.043	0.05451	0.036	1e-05
YGR096W	TPC1		0.97068	0.081	0.99008	0.04	-0.02781	0.081	0.00016
YGR097W	ASK10		0.9166	0.098	0.84171	0.203	0.03756	0.098	0.00033
YGR100W	MDR1		1.01608	0.015	0.99366	0.042	0.01436	0.015	7e-05	status=JK
YGR101W	PCP1		1.02546	0.008	0.90065	0.033	0.1233	0.008	2e-05	status=JK
YGR105W	VMA21		0.46484	0.049	0.23764	0.094	0.20544	0.048	0.00361	status=JK
YGR106C	VOA1		1.05096	0.014	1.01941	0.03	0.03376	0.014	6e-05	status=JK
YGR107W	YGR107W		0.98775	0.058	0.99815	0.073	-0.02682	0.058	6e-05
YGR108W	CLB1		1.06052	0.025	1.1058	0.058	-0.04609	0.024	0.00018	status=JK
YGR109C	CLB6		1.02166	0.04	0.99824	0.055	0.01945	0.04	2e-05
YGR110W	CLD1		1.04064	0.041	1.06077	0.076	-0.0104	0.041	2e-05
YGR111W	YGR111W		1.00401	0.057	0.99862	0.108	0.01862	0.057	5e-05
YGR117C	YGR117C		0.98045	0.029	1.03149	0.037	-0.05678	0.029	1e-05
YGR118W	RPS23A		0.90204	0.037	0.90043	0.07	0.01807	0.037	2e-05
YGR121C	MEP1		0.99788	0.014	0.99579	0.018	0.00043	0.014	0
YGR122C-A	YGR122C-A		0.97585	0.094	0.96844	0.093	0.02324	0.094	0.00024
YGR122W	YGR122W		0.89281	0.043	0.88823	0.084	-0.00633	0.043	3e-05
YGR123C	PPT1		1.04235	0.029	1.08995	0.016	-0.04109	0.029	1e-05
YGR124W	ASN2		0.99122	0.071	0.9726	0.017	0.01156	0.071	0.0001
YGR125W	YGR125W		0.85648	0.058	0.84059	0.069	0.00428	0.057	8e-05
YGR126W	YGR126W		1.04186	0.039	1.02572	0.019	0.01476	0.039	1e-05
YGR127W	YGR127W		1.03151	0.024	1.00916	0.016	0.02537	0.024	0
YGR129W	SYF2		1.03043	0.023	0.99762	0.032	0.03548	0.023	0
YGR130C	YGR130C		0.98323	0.01	0.96729	0.047	0.00855	0.01	3e-05	status=JK
YGR131W	FHN1		1.00201	0.037	1.00327	0.102	-0.02748	0.037	1e-05
YGR132C	PHB1		0.95794	0.02	0.84242	0.043	0.11618	0.02	0
YGR133W	PEX4		1.06309	0.018	1.03867	0.055	0.01511	0.017	0
YGR134W	CAF130		1.01204	0.032	1.01951	0.047	0.00501	0.032	1e-05
YGR135W	PRE9		0.86292	0.006	0.92572	0.057	-0.05649	0.006	1e-05	status=JK
YGR136W	LSB1		0.95954	0.004	1.00148	0.02	-0.03753	0.004	1e-05	status=JK
YGR137W	YGR137W		1.05301	0.137	1.03292	0.132	0.02466	0.137	0.0006
YGR138C	TPO2		1.02268	0.024	1.02257	0.03	0.00195	0.024	0
YGR139W	YGR139W		1.05732	0.136	1.01677	0.127	0.06621	0.136	0.00058
YGR141W	VPS62		1.00581	0.033	1.01687	0.027	-0.00659	0.033	1e-05
YGR142W	BTN2		0.98591	0.056	0.94622	0.006	0.0411	0.056	5e-05
YGR143W	SKN1		1.02292	0.002	0.94062	0.03	0.10013	0.002	0	status=JK
YGR144W	THI4		1.03854	0.01	1.10225	0.071	-0.06067	0.01	3e-05	status=JK
YGR146C	ECL1		1.08285	0.048	1.13682	0.041	-0.05289	0.047	2e-05
YGR148C	RPL24B		0.83603	0.015	0.97702	0.034	-0.13538	0.015	0
YGR149W	YGR149W		1.03532	0.037	1.07013	0.011	-0.03596	0.037	1e-05
YGR151C	YGR151C		1.08658	0.033	1.08821	0.069	-0.01814	0.033	1e-05
YGR152C	RSR1		0.99803	0.088	0.99963	0.033	-0.00361	0.088	0.00019
YGR153W	YGR153W		0.98267	0.037	0.98234	0.054	0.00478	0.037	1e-05
YGR154C	GTO1		0.88627	0.131	0.96123	0.13	-0.11327	0.131	0.00087
YGR157W	CHO2		0.52715	0.073	0.29667	0.032	0.23401	0.073	0.00072
YGR161C	RTS3		1.04601	0.079	1.01068	0.057	0.05485	0.079	0.00012
YGR163W	GTR2		0.96493	0.081	0.79853	0.037	0.17976	0.081	0.00016
YGR164W	YGR164W		1.02348	0.047	0.97998	0.043	0.04989	0.047	3e-05
YGR166W	TRS65		0.96597	0.019	1.04259	0.066	-0.08486	0.019	0
YGR168C	YGR168C		0.98775	0.038	0.98572	0.086	0.02392	0.038	2e-05
YGR169C	PUS6		1.01627	0.028	1.00537	0.048	0.02079	0.028	1e-05
YGR170W	PSD2		0.9595	0.034	0.89787	0.053	0.06388	0.034	1e-05
YGR173W	RBG2		1	0.054	0.98361	0.016	0.01763	0.054	4e-05
YGR174C	CBP4		0.93693	0.017	0.8573	0.054	0.06977	0.017	0
YGR176W	YGR176W		1.08028	0.047	1.02708	0.036	0.05518	0.047	2e-05
YGR177C	ATF2		1.02811	0.049	1.04295	0.033	-0.01997	0.049	3e-05
YGR178C	PBP1		0.98904	0.013	1.03262	0.014	-0.04575	0.013	0
YGR181W	TIM13		1.05883	0.062	1.03912	0.055	0.00974	0.062	5e-05
YGR182C	YGR182C		0.96915	0.029	0.92743	0.104	0.01799	0.029	1e-05
YGR183C	QCR9		0.93496	0.041	0.8584	0.044	0.05705	0.041	2e-05
YGR184C	UBR1		0.96759	0.025	0.93283	0.06	0.0314	0.025	0
YGR187C	HGH1		0.98965	0.007	0.95365	0.013	0.03562	0.007	0
YGR188C	BUB1		0.8045	0.079	0.61505	0.106	0.15564	0.079	0.00026
YGR189C	CRH1		1.06852	0.055	1.00426	0.01	0.06718	0.055	4e-05
YGR192C	TDH3		0.96412	0.054	1.02251	0.02	-0.06179	0.054	5e-05
YGR193C	PDX1		1.00658	0.038	0.93525	0.063	0.08751	0.038	2e-05
YGR194C	XKS1		1.00769	0.019	0.99888	0.034	0.00266	0.019	0
YGR196C	FYV8		0.99578	0.013	1.05578	0.058	-0.04783	0.013	0
YGR197C	SNG1		1.00691	0.009	1.00821	0.048	0.00342	0.009	2e-05	status=JK
YGR199W	PMT6		1.0205	0.025	1.04955	0.077	-0.01221	0.025	0.0002	status=JK
YGR200C	ELP2		0.85523	0.021	0.79002	0.074	0.07945	0.021	0
YGR201C	YGR201C		1.05299	0.015	1.07902	0.031	-0.01858	0.015	0
YGR202C	PCT1		1.04943	0.011	1.03176	0.02	0.0214	0.011	4e-05	status=JK
YGR203W	YCH1		0.97126	0.022	1.00804	0.023	-0.03581	0.022	0
YGR205W	TDA10		1.00139	0.045	0.97232	0.048	0.02005	0.045	3e-05
YGR206W	MVB12		0.98336	0.023	0.95983	0.134	-0.00212	0.023	0.00018	status=JK
YGR207C	CIR1		1.00962	0.061	0.97454	0.039	0.04185	0.061	6e-05
YGR208W	SER2		0.98381	0.023	0.90919	0.029	0.06995	0.023	0
YGR209C	TRX2		0.98308	0.017	0.9966	0.047	-0.01035	0.017	0
YGR210C	YGR210C		0.98364	0.048	0.93653	0.068	0.06291	0.048	3e-05
YGR212W	SLI1		0.99418	0.047	0.99427	0.089	0.0105	0.047	3e-05
YGR213C	RTA1		1.02454	0.014	1.06036	0.014	-0.04322	0.014	0
YGR214W	RPS0A		0.93904	0.03	0.87254	0.037	0.07566	0.03	1e-05
YGR217W	CCH1		0.97957	0.03	0.98938	0.027	-0.00156	0.03	1e-05
YGR221C	TOS2		0.98396	0.01	0.98466	0.035	-0.00575	0.01	4e-05	status=JK
YGR223C	HSV2		0.97862	0.06	1.01685	0.046	-0.03058	0.06	6e-05
YGR224W	AZR1		1.04886	0.021	0.97516	0.093	0.0819	0.021	0
YGR225W	AMA1		0.95151	0.012	1.03991	0.047	-0.097	0.012	6e-05	status=JK
YGR226C	YGR226C		1.04022	0.02	1.07582	0.051	-0.03165	0.02	0
YGR227W	DIE2		1.04705	0.028	1.03092	0.03	0.01556	0.028	1e-05
YGR228W	YGR228W		0.99659	0.016	1.00151	0.036	0.00299	0.016	0
YGR229C	SMI1		1.02242	0.024	0.99949	0.091	0.00021	0.024	0
YGR230W	BNS1		1.07186	0.026	1.03161	0.004	0.04244	0.026	0
YGR231C	PHB2		0.85502	0.018	0.54069	0.051	0.30953	0.018	0
YGR232W	NAS6		1.03949	0.021	1.00371	0.056	0.03731	0.021	0
YGR233C	PHO81		0.98564	0.044	1.01741	0.083	-0.02515	0.044	2e-05
YGR234W	YHB1		1.05964	0.051	1.08413	0.013	-0.02233	0.051	3e-05
YGR235C	MOS2		1.05003	0.119	1.06125	0.031	-0.00568	0.119	0.0004
YGR236C	SPG1		0.98231	0.05	0.98194	0.056	0.00096	0.05	4e-05
YGR237C	YGR237C		0.93032	0.018	0.9448	0.056	-0.01334	0.018	0.00013	status=JK
YGR238C	KEL2		1.0584	0.026	1.03468	0.037	0.01779	0.026	0.0002	status=JK
YGR239C	PEX21		1.00184	0.028	0.93237	0.046	0.04364	0.028	1e-05
YGR241C	YAP1802		1.01792	0.025	1.02123	0.022	-0.00698	0.025	0
YGR242W	YGR242W		1.02699	0.021	1.02978	0.039	-0.0047	0.021	0
YGR243W	FMP43		1.02678	0.003	1.02413	0.057	0.00712	0.003	0	status=JK
YGR244C	LSC2		1.05291	0.024	1.05454	0.108	-0.00079	0.024	0
YGR247W	CPD1		1.03717	0.006	1.02927	0.091	-0.0024	0.006	1e-05	status=JK
YGR248W	SOL4		1.01305	0.016	1.02173	0.005	-0.01041	0.016	8e-05	status=JK
YGR249W	MGA1		1.01091	0.01	0.97439	0.013	0.04305	0.01	4e-05	status=JK
YGR250C	YGR250C		0.98983	0.056	0.90038	0.009	0.09026	0.056	5e-05
YGR254W	ENO1		1.01675	0.034	1.04307	0.115	-0.01821	0.034	0.00037	status=JK
YGR255C	COQ6		1.00536	0.047	1.00785	0.005	-0.00117	0.047	3e-05
YGR256W	GND2		1.06674	0.041	1.08874	0.021	-0.01123	0.041	2e-05
YGR259C	YGR259C		0.85779	0.045	0.68371	0.038	0.16158	0.045	4e-05
YGR260W	TNA1		0.95914	0.035	0.62234	0.07	0.32367	0.034	1e-05
YGR261C	APL6		1.027	0.04	1.0868	0.033	-0.05349	0.04	2e-05
YGR263C	SAY1		1.08232	0.044	1.0448	0.033	0.02889	0.044	2e-05
YGR266W	YGR266W		0.99494	0.026	1.06699	0.079	-0.09063	0.026	1e-05
YGR268C	HUA1		1.07801	0.018	0.49628	0.579	0.63088	0.018	0.0001	status=JK
YGR269W	YGR269W		1.01357	0.031	0.85378	0.343	0.08604	0.031	1e-05
YGR270W	YTA7		0.61427	0.068	0.21002	0.027	0.40514	0.068	0.00037
YGR271W	SLH1		1.02189	0.027	0.95158	0.216	0.0373	0.027	0
YGR272C	YGR272C		1.01901	0.061	0.97988	0.062	0.03797	0.061	6e-05
YGR273C	YGR273C		1.06262	0.021	1.08257	0.028	-0.0239	0.021	0
YGR275W	RTT102		0.89935	0.125	0.9897	0.181	-0.14558	0.125	0.00072
YGR276C	RNH70		1.02442	0.01	0.95345	0.066	0.08131	0.009	0
YGR279C	SCW4		0.7901	0.185	0.90001	0.092	-0.09413	0.184	0.00335
YGR281W	YOR1		0.98846	0.089	0.90339	0.215	0.06457	0.089	0.0002
YGR282C	BGL2		1.01878	0.087	1.0287	0.162	-0.01617	0.087	0.00017
YGR283C	YGR283C		1.01332	0.065	1.01321	0.123	0.00043	0.065	7e-05
YGR284C	ERV29		1.00304	0.039	1.03071	0.039	-0.04922	0.039	2e-05
YGR286C	BIO2		0.99604	0.015	0.98714	0.048	0.02113	0.015	0
YGR287C	IMA1		0.99205	0.043	0.96491	0.108	0.00527	0.043	2e-05
YGR288W	MAL13		0.99028	0.017	0.99892	0.034	-0.01223	0.016	0
YGR289C	MAL11		1.0505	0.083	1.03308	0.099	0.02437	0.082	0.00013
YGR290W	YGR290W		1.04022	0.043	1.03987	0.063	-0.00499	0.043	2e-05
YGR291C	YGR291C		1.04076	0.019	1.09066	0.023	-0.05603	0.019	0
YGR292W	MAL12		1.0265	0.033	1.01693	0.029	0.01301	0.033	1e-05
YGR295C	COS6		0.99119	0.015	1.04197	0.017	-0.04873	0.015	0
YHL002W	HSE1		1.01824	0.063	1.06221	0.13	-0.02768	0.063	6e-05
YHL003C	LAG1		1.06054	0.081	1.04109	0.023	0.02508	0.081	0.00012
YHL005C	YHL005C		0.96418	0.037	0.97131	0.038	-0.01513	0.037	2e-05
YHL006C	SHU1		0.97501	0.021	1.07322	0.04	-0.09519	0.021	0
YHL007C	STE20		0.35514	0.243	0	0	0.35471	0.243	0.06134
YHL008C	YHL008C		1.02737	0.035	0.97341	0.143	0.0295	0.035	1e-05
YHL009C	YAP3		1.02159	0.025	1.02911	0.054	-0.00773	0.025	0
YHL010C	ETP1		1.01463	0.003	1.06426	0.017	-0.05436	0.003	0	status=JK
YHL012W	YHL012W		1.00908	0.011	1.04453	0.029	-0.04074	0.011	0
YHL013C	OTU2		1.02588	0.012	1.08786	0.107	-0.03147	0.012	5e-05	status=JK
YHL014C	YLF2		1.03371	0.014	1.05876	0.054	-0.02925	0.014	6e-05	status=JK
YHL016C	DUR3		1.02029	0.057	1.00904	0.086	0.02186	0.056	5e-05
YHL017W	YHL017W		0.99176	0.047	0.99724	0.027	-0.00611	0.047	3e-05
YHL019C	APM2		1.00873	0.007	0.97794	0.035	0.02329	0.007	2e-05	status=JK
YHL020C	OPI1		0.65281	0.061	0.54916	0.075	0.1025	0.061	0.00022
YHL021C	AIM17		1.01358	0.013	1.0625	0.133	-0.01094	0.013	0
YHL022C	SPO11		0.98333	0.016	1.02976	0.054	-0.05984	0.016	0
YHL023C	NPR3		0.81549	0.073	0.65016	0.046	0.1596	0.072	0.00019
YHL024W	RIM4		1.01446	0.022	1.05501	0.037	-0.04023	0.022	0
YHL025W	SNF6		1.16304	0.047	1.04848	0.017	0.11451	0.047	2e-05
YHL026C	YHL026C		1.01959	0.01	1.00982	0.021	0.0035	0.01	3e-05	status=JK
YHL027W	RIM101		0.85227	0.143	0.80732	0.087	0.0556	0.143	0.00127
YHL028W	WSC4		1.0082	0.043	1.00674	0.021	0.00183	0.043	2e-05
YHL029C	OCA5		0.93551	0.035	1.00474	0.028	-0.07172	0.035	1e-05
YHL030W	ECM29		1.05169	0.035	1.19009	0.139	-0.09537	0.035	1e-05
YHL031C	GOS1		0.73983	0.107	0.68807	0.017	0.05372	0.107	0.00083
YHL032C	GUT1		0.97954	0.007	1.06486	0.033	-0.08397	0.007	2e-05	status=JK
YHL033C	RPL8A		0.83859	0.013	0.92373	0.099	-0.09989	0.013	0
YHL034C	SBP1		0.96623	0.005	0.94817	0.146	-0.00737	0.005	0
YHL035C	VMR1		1.03243	0.025	1.02185	0.069	0.00619	0.025	0
YHL036W	MUP3		1.05121	0.054	1.06688	0.052	-0.01919	0.054	4e-05
YHL037C	YHL037C		1.02094	0.028	0.99071	0.053	0.03725	0.028	1e-05
YHL039W	EFM1		1.05278	0.065	0.97027	0.021	0.09196	0.065	6e-05
YHL040C	ARN1		1.01351	0.053	1.03682	0.075	-0.03393	0.053	4e-05
YHL041W	YHL041W		1.01285	0.014	1.00394	0.025	0.01482	0.014	6e-05	status=JK
YHL042W	YHL042W		1.00448	0.024	0.9848	0.015	0.02303	0.024	0
YHL043W	ECM34		1.00616	0.023	1.02573	0.013	-0.02062	0.023	0
YHL044W	YHL044W		1.00504	0.032	1.04278	0.115	-0.02966	0.032	1e-05
YHL045W	YHL045W		1.016	0.004	1.05509	0.016	-0.04682	0.004	0	status=JK
YHL046C	PAU13		1.01161	0.013	1.00984	0.028	-0.00924	0.013	6e-05	status=JK
YHL047C	ARN2		1.02512	0.003	1.06174	0.064	-0.02202	0.003	0	status=JK
YHR001W-A	QCR10		1.00291	0.035	1.02351	0.039	-0.00812	0.035	1e-05
YHR003C	YHR003C		0.97221	0.027	0.94251	0.089	0.00752	0.027	0.00025	status=JK
YHR004C	NEM1		0.93267	0.073	0.82333	0.091	0.09751	0.073	0.00013
YHR005C	GPA1		0	0	0	0	0	0	#NUM!
YHR006W	STP2		1.0198	0.042	1.00975	0.034	8e-05	0.042	2e-05
YHR008C	SOD2		0.98484	0.149	1.00333	0.042	-0.02279	0.149	0.00093
YHR009C	TDA3		1.02479	0.03	0.90685	0.093	0.11034	0.03	0.00029	status=JK
YHR012W	VPS29		0.8773	0.059	0.8361	0.036	0.04321	0.059	8e-05
YHR014W	SPO13		0.95305	0.034	0.84845	0.114	0.07808	0.034	1e-05
YHR015W	MIP6		0.99262	0.031	1.01082	0.052	-0.01304	0.031	1e-05
YHR016C	YSC84		1.00969	0.049	1.02565	0.061	-0.00599	0.049	3e-05
YHR017W	YSC83		0.97834	0.041	1.00798	0.091	-0.05182	0.041	2e-05
YHR018C	ARG4		0.33326	0.038	0.14041	0.005	0.19395	0.038	0.00435	status=JK
YHR021C	RPS27B		0.6206	0.045	0.46982	0.062	0.16044	0.045	0.00011
YHR021W-A	ECM12		0.92051	0.093	1.00508	0.036	-0.08413	0.093	0.00028
YHR022C	YHR022C		1.02371	0.021	0.877	0.223	0.10163	0.021	0.00014	status=JK
YHR025W	THR1		0.49127	0.029	0.56778	0.083	-0.06452	0.029	0.00117	status=JK
YHR028C	DAP2		1.00362	0.016	1.03319	0.034	-0.02517	0.016	8e-05	status=JK
YHR029C	YHI9		1.00553	0.014	1.01287	0.009	-0.00888	0.014	7e-05	status=JK
YHR030C	SLT2		0.85585	0.007	0.93406	0.017	-0.07384	0.007	2e-05	status=JK
YHR031C	RRM3		1.11789	0.062	1.18377	0.076	-0.0505	0.062	5e-05
YHR032W	ERC1		1.07133	0.048	0.98419	0.086	0.0896	0.047	2e-05
YHR033W	YHR033W		1.02191	0.027	1.0471	0.066	-0.01496	0.027	1e-05
YHR034C	PIH1		0.92935	0.029	0.99499	0.053	-0.06028	0.029	1e-05
YHR035W	YHR035W		1.04671	0.016	0.98601	0.125	0.04851	0.016	8e-05	status=JK
YHR037W	PUT2		0.99731	0.012	0.91213	0.264	0.05309	0.012	5e-05	status=JK
YHR039C	MSC7		0.92873	0.006	0.87574	0.11	0.07361	0.006	2e-05	status=JK
YHR041C	SRB2		0.32441	0.013	0.12993	0.008	0.19672	0.013	0.00053	status=JK
YHR043C	DOG2		0.98079	0.105	1.09939	0.05	-0.09202	0.105	0.00033
YHR044C	DOG1		1.06975	0.027	0.90372	0.272	0.15342	0.026	0.0002	status=JK
YHR045W	YHR045W		0.928	0.105	0.99286	0.147	-0.07261	0.104	0.00039
YHR046C	INM1		0.99175	0.057	0.99128	0.088	-0.00949	0.057	5e-05
YHR047C	AAP1		0.99286	0.059	1.02061	0.137	-0.01199	0.059	6e-05
YHR048W	YHK8		0.97558	0.021	0.90908	0.034	0.07033	0.021	0.00015	status=JK
YHR049C-A	YHR049C-A		1.01051	0.009	0.98778	0.033	0.02364	0.009	0
YHR049W	FSH1		1.01676	0.039	0.99676	0.024	0.02016	0.039	2e-05
YHR050W	SMF2		0.90184	0.072	0.82285	0.108	0.0732	0.072	0.00014
YHR057C	CPR2		0.92356	0.131	0.99255	0.058	-0.0557	0.131	0.00078
YHR059W	FYV4		0	0	0.10602	0.131	-0.07685	0	#NUM!
YHR061C	GIC1		0.26968	0.021	0.27363	0.036	-0.01529	0.021	0.00197	status=JK
YHR066W	SSF1		0.90731	0.036	0.92885	0.044	-0.02922	0.036	2e-05
YHR067W	HTD2		0.79586	0.046	0.65476	0.076	0.14409	0.046	5e-05
YHR073W	OSH3		1.04402	0.017	1.03886	0.058	0.01148	0.017	0
YHR075C	PPE1		1.01861	0.008	1.05015	0.044	-0.04464	0.008	2e-05	status=JK
YHR076W	PTC7		0.98759	0.024	1.00562	0.054	-0.01275	0.024	0
YHR077C	NMD2		0.98078	0.031	0.96882	0.026	0.00987	0.031	1e-05
YHR078W	YHR078W		1.01732	0.006	1.00055	0.022	0.0223	0.006	0
YHR079C	IRE1		1.04521	0.031	0.99157	0.053	0.0411	0.031	1e-05
YHR079C-B	YHR079C-B		1.05063	0.004	1.05387	0.016	-0.00769	0.004	0	status=JK
YHR080C	YHR080C		1.01344	0.067	1.05954	0.057	-0.03921	0.067	8e-05
YHR081W	LRP1		0.75752	0.029	0.35258	0.03	0.40475	0.029	1e-05
YHR082C	KSP1		1.01234	0.002	1.03003	0.016	-0.02067	0.002	0	status=JK
YHR086W	NAM8		1.04042	0.007	0.9659	0.13	0.08106	0.007	1e-05	status=JK
YHR087W	RTC3		0.98925	0.012	1.03525	0.107	-0.082	0.012	5e-05	status=JK
YHR092C	HXT4		1.00673	0.036	1.01878	0.054	0.00013	0.036	1e-05
YHR093W	YHR093W		0.99485	0.013	1.01345	0.027	-0.02213	0.013	0
YHR094C	HXT1		1.05884	0.012	1.03987	0.06	0.00924	0.012	0
YHR095W	YHR095W		1.02172	0.03	1.0065	0.081	0.01423	0.03	1e-05
YHR096C	HXT5		0.97825	0.053	0.99504	0.101	0.00576	0.053	4e-05
YHR097C	YHR097C		0.94424	0.024	0.9563	0.062	-0.01607	0.024	0
YHR103W	SBE22		0.9799	0.005	1.00194	0.042	-0.01734	0.005	1e-05	status=JK
YHR104W	GRE3		1.02496	0.011	1.03527	0.046	-0.01472	0.011	0
YHR105W	YPT35		1.01938	0.002	0.97951	0.054	0.04002	0.002	0	status=JK
YHR106W	TRR2		1.02099	0.015	1.01971	0.073	0.01791	0.015	7e-05	status=JK
YHR108W	GGA2		0.94996	0.05	0.97587	0.04	-0.01708	0.05	4e-05
YHR109W	CTM1		1.00989	0.022	0.99976	0.05	0.01082	0.022	0
YHR110W	ERP5		1.03556	0.056	1.07147	0.007	-0.03235	0.056	4e-05
YHR111W	UBA4		0.89932	0.03	0.77398	0.047	0.13096	0.03	1e-05
YHR112C	YHR112C		1.025	0.026	1.06141	0.027	-0.03221	0.026	0
YHR113W	APE4		0.9403	0.009	1.04053	0.022	-0.08983	0.009	3e-05	status=JK
YHR114W	BZZ1		1.11223	0.125	1.06704	0.111	0.05044	0.125	0.00039
YHR115C	DMA1		1.01743	0.043	1.04025	0.016	-0.01827	0.043	2e-05
YHR116W	COX23		0.80963	0.007	0.67685	0.079	0.12554	0.007	3e-05	status=JK
YHR117W	TOM71		0.994	0.022	1.01623	0.041	-0.02938	0.022	0
YHR121W	LSM12		0.98622	0.026	1.02558	0.023	-0.03842	0.026	0
YHR123W	EPT1		0.9995	0.028	0.91193	0.086	0.07339	0.028	1e-05
YHR124W	NDT80		0.99634	0.028	1.0216	0.05	-0.02894	0.028	1e-05
YHR125W	YHR125W		1.01918	0.004	1.03534	0.019	-0.01178	0.004	0
YHR126C	ANS1		0.97487	0.016	1.02158	0.045	-0.05039	0.016	0
YHR127W	YHR127W		1.00058	0.02	0.98887	0.068	0.01589	0.02	0
YHR129C	ARP1		0.80514	0.123	0.78733	0.202	0.07409	0.122	0.00095
YHR130C	YHR130C		1.00505	0.019	1.06523	0.106	-0.03826	0.019	0.00012	status=JK
YHR131C	YHR131C		0.97682	0.029	1.00529	0.024	-0.03437	0.029	1e-05
YHR132C	ECM14		1.02005	0.036	0.99689	0.037	0.02421	0.036	1e-05
YHR132W-A	IGO2		1.01992	0.024	1.00974	0.023	0.0105	0.024	0
YHR133C	NSG1		1.0039	0.066	0.99379	0.03	-0.00101	0.066	8e-05
YHR134W	WSS1		0.95045	0.015	0.90551	0.001	0.04534	0.015	0
YHR135C	YCK1		1.00323	0.039	0.96811	0.004	0.03501	0.039	2e-05
YHR136C	SPL2		1.03749	0.006	1.02776	0.056	0.00319	0.006	1e-05	status=JK
YHR137W	ARO9		1.02843	0.031	1.0792	0.023	-0.03853	0.031	1e-05
YHR138C	YHR138C		1.07595	0.033	1.12394	0.014	-0.05421	0.033	1e-05
YHR139C	SPS100		0.98386	0.064	0.96209	0.003	0.02372	0.064	8e-05
YHR139C-A	YHR139C-A		1.00587	0.044	1.042	0.037	-0.02942	0.044	2e-05
YHR140W	YHR140W		1.06669	0.072	1.05143	0.035	0.0232	0.072	8e-05
YHR142W	CHS7		1.0087	0.042	0.95267	0.05	0.05357	0.042	2e-05
YHR143W	DSE2		1.00601	0.011	0.97797	0.018	0.03042	0.011	4e-05	status=JK
YHR146W	CRP1		1.04363	0.049	1.06069	0.049	-0.0235	0.049	3e-05
YHR150W	PEX28		1.02441	0.014	1.03478	0.056	-4e-05	0.014	0
YHR151C	MTC6		0.98642	0.006	1.02375	0.015	-0.04323	0.006	0
YHR152W	SPO12		0.98453	0.049	1.0324	0.031	-0.05335	0.049	3e-05
YHR153C	SPO16		0.99658	0.016	0.64548	0.536	0.24991	0.016	9e-05	status=JK
YHR154W	RTT107		0.93802	0.059	1.00838	0.119	-0.09262	0.059	7e-05
YHR155W	YSP1		1.05284	0.048	1.07623	0.165	-0.04374	0.048	3e-05
YHR156C	LIN1		1.0083	0.012	0.78835	0.079	0.20637	0.012	5e-05	status=JK
YHR157W	REC104		1.01701	0.072	1.07046	0.058	-0.07332	0.072	0.0001
YHR158C	KEL1		0.91968	0.046	1.00475	0.066	-0.12208	0.046	3e-05
YHR159W	TDA11		1.02926	0.052	0.99035	0.051	0.04028	0.052	4e-05
YHR160C	PEX18		1.08187	0.055	1.06183	0.016	0.01594	0.055	4e-05
YHR161C	YAP1801		1.04802	0.083	1.09623	0.18	-0.10559	0.083	0.00013
YHR162W	MPC2		0.98421	0.05	0.88671	0.004	0.0984	0.05	4e-05
YHR163W	SOL3		0.96761	0.007	0.97059	0.069	-0.01902	0.007	2e-05	status=JK
YHR167W	THP2		1.07759	0.008	0.99441	0.032	0.07424	0.008	0
YHR171W	ATG7		0.99446	0.018	0.98805	0.042	0.01386	0.018	0
YHR176W	FMO1		1.08212	0.027	1.06953	0.079	0.01008	0.027	0
YHR178W	STB5		0.82905	0.042	0.51374	0.094	0.32478	0.041	3e-05
YHR179W	OYE2		1.08531	0.019	1.07633	0.068	0.02754	0.019	0
YHR180W	YHR180W		0.89403	0.021	1.10938	0.068	-0.21335	0.021	0
YHR181W	SVP26		1.01075	0.024	1.13407	0.089	-0.11369	0.024	0.00019	status=JK
YHR182W	YHR182W		1.05993	0.089	1.07151	0.108	-0.02616	0.089	0.00016
YHR184W	SSP1		1.00821	0.01	1.06382	0.047	-0.05629	0.01	3e-05	status=JK
YHR185C	PFS1		0.99565	0.022	1.02934	0.017	-0.03118	0.022	0
YHR189W	PTH1		0.88227	0.026	0.81309	0.064	0.0539	0.026	1e-05
YHR191C	CTF8		0.93279	0.026	0.91677	0.084	0.02516	0.026	0.00026	status=JK
YHR193C	EGD2		0.00041	0	0	0	0.00041	0	0.1817
YHR194W	MDM31		0.00312	0.005	0.1784	0.036	-0.15541	0.005	0.36837	status=JK
YHR195W	NVJ1		1.0308	0.018	1.00582	0.021	0.02625	0.018	0
YHR198C	AIM18		0.93626	0.017	0.87428	0.011	0.06742	0.017	0
YHR199C	AIM46		1.00202	0.022	1.00978	0.031	-0.01423	0.022	0
YHR200W	RPN10		0.85368	0.042	0.84853	0.07	0.02307	0.042	3e-05
YHR202W	YHR202W		0.96525	0.055	0.93229	0.058	0.03678	0.055	5e-05
YHR203C	RPS4B		0.76095	0.052	0.77156	0.152	-0.01626	0.052	9e-05
YHR204W	MNL1		1.02479	0.012	1.06444	0.048	-0.02784	0.012	0
YHR206W	SKN7		1.00016	0.024	0.98128	0.015	0.01938	0.024	0
YHR207C	SET5		1.00901	0.002	1.02542	0.023	-0.02154	0.002	0	status=JK
YHR209W	CRG1		1.00373	0.023	1.02643	0.032	-0.01927	0.023	0
YHR210C	YHR210C		1.03884	0.048	1.06293	0.015	-0.01707	0.048	3e-05
YIL001W	YIL001W		1.00441	0.008	1.03013	0.008	-0.02857	0.008	2e-05	status=JK
YIL002C	INP51		1.01141	0.017	0.98587	0	0.02583	0.017	0
YIL005W	EPS1		0.99941	0.012	0.99805	0.048	-0.00752	0.012	5e-05	status=JK
YIL006W	YIA6		0.95865	0.008	0.96584	0.037	-0.01023	0.008	2e-05	status=JK
YIL007C	NAS2		0.99445	0.023	0.98568	0.058	0.00883	0.023	0
YIL008W	URM1		0.79602	0.012	0.71852	0.05	0.07915	0.012	8e-05	status=JK
YIL009C-A	EST3		1.01775	0.031	0.98772	0.063	0.04556	0.031	1e-05
YIL010W	DOT5		1.03136	0.033	1.01097	0.014	0.02278	0.033	1e-05
YIL011W	TIR3		0	0	0.10599	0.184	0	0	#NUM!	status=JK
YIL012W	YIL012W		1.01751	0.005	1.02053	0.049	-0.0178	0.005	1e-05	status=JK
YIL013C	PDR11		1.01043	0.032	0.96992	0.085	0.05279	0.032	1e-05
YIL014W	MNT3		1.03391	0.048	1.00172	0.033	0.02608	0.048	3e-05
YIL015C-A	YIL015C-A		0.96235	0.072	1.00791	0.006	-0.04482	0.072	0.00012
YIL015W	BAR1		0.99084	0.013	0.99585	0.039	0.00166	0.013	0
YIL016W	SNL1		1.02801	0.005	0.99351	0.035	0.04349	0.005	1e-05	status=JK
YIL017C	VID28		1.03476	0.012	1.10264	0.036	-0.05579	0.012	0
YIL020C	HIS6		0.39198	0.084	0.12556	0.014	0.26422	0.084	0.00259
YIL023C	YKE4		0.99409	0.023	1.03452	0.028	-0.04012	0.023	0
YIL024C	YIL024C		1.05612	0.014	1.04646	0.017	0.00616	0.014	0
YIL025C	YIL025C		0.99051	0.014	0.98894	0.032	-0.00253	0.014	0
YIL027C	EMC5		0.98513	0.048	1.00793	0.081	-0.00417	0.048	3e-05
YIL028W	YIL028W		0.96628	0.004	0.96568	0.011	0.00093	0.004	0
YIL029C	YIL029C		1.01894	0.068	1.08421	0.031	-0.06675	0.068	8e-05
YIL030C	SSM4		0.97083	0.089	0.94348	0.029	0.02848	0.089	0.00021
YIL032C	YIL032C		1.02385	0.04	0.98967	0.069	0.04752	0.04	2e-05
YIL034C	CAP2		0.98698	0.045	1.01568	0.034	-0.03314	0.045	3e-05
YIL035C	CKA1		0.97016	0.019	1.06306	0.069	-0.09659	0.019	0.00012	status=JK
YIL036W	CST6		0.99985	0.022	0.92886	0.048	0.06579	0.022	0
YIL037C	PRM2		0.98975	0.01	1.01706	0.024	-0.02974	0.01	0
YIL038C	NOT3		0.9987	0.009	1.01416	0.058	-0.02719	0.009	0
YIL039W	TED1		0.992	0.014	1.02098	0.036	-0.0362	0.014	0
YIL040W	APQ12		0.52118	0.103	0.32764	0.028	0.20653	0.103	0.00204
YIL041W	GVP36		0.99388	0.062	1.05887	0.078	-0.07967	0.062	7e-05
YIL042C	PKP1		0.99625	0.068	1.09174	0.055	-0.08226	0.068	9e-05
YIL043C	CBR1		1.06299	0.092	0.99237	0.04	0.05265	0.091	0.00017
YIL044C	AGE2		0.91113	0.037	0.93012	0.016	-0.0197	0.037	2e-05
YIL045W	PIG2		1.0443	0.038	1.00693	0.036	0.03054	0.038	1e-05
YIL047C	SYG1		1.00204	0.019	0.94651	0.11	0.06367	0.019	0
YIL049W	DFG10		1.02961	0.039	0.98981	0.065	0.02247	0.039	1e-05
YIL050W	PCL7		1.05418	0.028	1.03988	0.036	0.034	0.028	1e-05
YIL052C	RPL34B		0.99338	0.016	0.96523	0.019	0.028	0.016	0
YIL053W	RHR2		0.88423	0.094	1.00198	0.065	-0.1304	0.094	0.00033
YIL054W	YIL054W		1.01009	0.056	1.02201	0.066	-0.01017	0.056	5e-05
YIL055C	YIL055C		1.02894	0.007	0.75489	0.215	0.32949	0.007	1e-05	status=JK
YIL056W	VHR1		0.95038	0.019	0.87447	0.048	0.06501	0.019	0.00013	status=JK
YIL057C	RGI2		1.04551	0.013	0.92437	0.165	0.11175	0.013	5e-05	status=JK
YIL058W	YIL058W		0.99964	0.071	1.06932	0.035	-0.08285	0.071	0.0001
YIL059C	YIL059C		1.04112	0.054	0.94371	0.009	0.09951	0.054	4e-05
YIL060W	YIL060W		1.01626	0.063	0.95987	0.134	0.06532	0.063	7e-05
YIL064W	SEE1		0.92589	0.003	1.04243	0.199	-0.13514	0.003	0	status=JK
YIL065C	FIS1		0.92366	0.009	0.97263	0.051	-0.05654	0.009	3e-05	status=JK
YIL066C	RNR3		1.01399	0.007	1.03579	0.035	-0.02935	0.007	2e-05	status=JK
YIL067C	YIL067C		0.95195	0.038	0.99948	0.006	-0.04453	0.038	2e-05
YIL070C	MAM33		1.01025	0.03	0.97812	0.006	0.03154	0.03	1e-05
YIL071C	PCI8		0.9401	0.022	0.93342	0.01	0.00789	0.022	0
YIL072W	HOP1		1.01462	0.047	1.02722	0.027	-0.00378	0.047	3e-05
YIL073C	SPO22		1.04754	0.064	0.97863	0.023	0.08236	0.064	6e-05
YIL074C	SER33		1.01046	0.018	1.02786	0.053	-0.00012	0.018	0
YIL076W	SEC28		0.77515	0.034	0.73174	0.011	0.04798	0.034	2e-05
YIL077C	YIL077C		0.97559	0.034	0.96538	0.093	0.01907	0.034	1e-05
YIL079C	AIR1		1.03486	0.06	1.05131	0.068	-0.00493	0.06	5e-05
YIL084C	SDS3		0.74498	0.068	0.47295	0.047	0.27758	0.068	0.00021
YIL085C	KTR7		0.94887	0.059	0.96218	0.085	-0.02307	0.059	7e-05
YIL086C	YIL086C		0.985	0.027	0.99435	0.048	-0.00779	0.027	1e-05
YIL087C	AIM19		1.03189	0.01	1.01005	0.035	0.03108	0.01	3e-05	status=JK
YIL088C	AVT7		1.02734	0.027	1.03276	0.025	-3e-05	0.027	1e-05
YIL089W	YIL089W		1.07517	0.099	1.02287	0.02	0.06346	0.099	0.00022
YIL090W	ICE2		0.54021	0.095	0.52975	0.03	0.00399	0.095	0.00145
YIL092W	YIL092W		0.97054	0.094	0.95588	0.021	0.00661	0.093	0.00024
YIL093C	RSM25		0.99955	0.052	1.02264	0.053	-0.02757	0.052	4e-05
YIL094C	LYS12		0.40001	0.066	0.16418	0.009	0.23155	0.066	0.00119
YIL095W	PRK1		0.99957	0.033	1.05875	0.007	-0.05636	0.033	1e-05
YIL096C	YIL096C		1.04697	0.045	1.03193	0.098	0.0351	0.045	2e-05
YIL097W	FYV10		0.96237	0.02	0.97574	0.08	-0.02483	0.02	0.00014	status=JK
YIL098C	FMC1		1.01012	0.019	1.01208	0.038	-0.00873	0.019	0
YIL099W	SGA1		1.00846	0.006	1.02673	0.026	-0.01522	0.006	1e-05	status=JK
YIL100W	YIL100W		1.0379	0.021	1.05457	0.026	-0.02377	0.021	0.00014	status=JK
YIL101C	XBP1		0.99598	0.001	1.08819	0.015	-0.09621	0.001	0	status=JK
YIL102C	YIL102C		1.00381	0.039	1.04494	0.008	-0.04024	0.039	2e-05
YIL103W	DPH1		0.96853	0.019	0.9853	0.039	-0.0192	0.019	0.00012	status=JK
YIL105C	SLM1		1.01263	0.061	1.02035	0.009	-0.00965	0.061	6e-05
YIL107C	PFK26		0.9759	0.093	0.97943	0.044	-0.00367	0.093	0.00024
YIL108W	YIL108W		1.01498	0.024	1.00445	0.007	0.01237	0.024	0
YIL110W	HPM1		0.80693	0.024	0.92048	0.03	-0.1008	0.024	1e-05
YIL111W	COX5B		1.01053	0.033	0.99737	0.02	0.01369	0.032	1e-05
YIL112W	HOS4		0.93736	0.065	0.96739	0.129	-0.01958	0.065	9e-05
YIL113W	SDP1		0.97116	0.037	0.97019	0.029	0.00683	0.037	1e-05
YIL114C	POR2		1.01867	0.023	0.99339	0.067	0.02292	0.023	0
YIL116W	HIS5		0.31192	0.013	0.15869	0.024	0.14542	0.013	0.00055	status=JK
YIL117C	PRM5		1.01922	0.025	1.01625	0.022	-0.00227	0.025	0
YIL119C	RPI1		1.01667	0.007	0.99085	0.042	0.02325	0.007	2e-05	status=JK
YIL120W	QDR1		1.00803	0.107	1.01255	0.013	-0.00379	0.107	0.00032
YIL122W	POG1		0.9741	0.073	0.98862	0.03	-0.0078	0.073	0.00012
YIL123W	SIM1		1.00684	0.027	0.97554	0.061	0.0238	0.027	1e-05
YIL124W	AYR1		0.97658	0.051	1.01881	0.077	-0.05966	0.051	4e-05
YIL125W	KGD1		0	0	0.00115	0.002	0	0	#NUM!
YIL128W	MET18		0.84998	0.074	0.68205	0.024	0.17186	0.074	0.00018
YIL130W	ASG1		1.05501	0.042	0.97417	0.022	0.07325	0.042	2e-05
YIL131C	FKH1		0.99108	0.075	1.05189	0.034	-0.06578	0.075	0.00012
YIL132C	CSM2		0.96112	0.032	0.9808	0.095	-0.03265	0.032	1e-05
YIL133C	RPL16A		0.92497	0.006	0.92848	0.052	-0.0296	0.006	1e-05	status=JK
YIL134W	FLX1		0.86167	0.027	0.41692	0.014	0.43902	0.027	1e-05
YIL135C	VHS2		1.07712	0.03	1.05279	0.025	0.03376	0.03	1e-05
YIL136W	OM45		1.01924	0.015	1.01824	0.007	-0.00293	0.015	0
YIL137C	TMA108		0.99082	0.006	0.91676	0.108	0.09474	0.006	1e-05	status=JK
YIL138C	TPM2		1.02287	0.049	1.01098	0.008	0.01718	0.049	3e-05
YIL139C	REV7		1.01222	0.097	0.9634	0.06	0.04053	0.097	0.00024
YIL140W	AXL2		1.05474	0.134	1.10119	0.04	-0.0437	0.134	0.00056
YIL141W	YIL141W		1.0738	0.006	1.09033	0.033	-0.02422	0.006	1e-05	status=JK
YIL145C	PAN6		1.01788	0.016	1.01914	0.076	0.00207	0.016	8e-05	status=JK
YIL146C	ATG32		1.07321	0.018	1.01624	0.072	0.06223	0.018	9e-05	status=JK
YIL148W	RPL40A		0.98311	0.014	0.98963	0.075	0.0115	0.014	7e-05	status=JK
YIL149C	MLP2		1.00812	0.015	1.0069	0.012	0.00306	0.015	0
YIL151C	YIL151C		0.95031	0.038	0.94741	0.035	-0.0012	0.038	2e-05
YIL152W	YIL152W		0.98993	0.021	1.04406	0.038	-0.05407	0.021	0
YIL153W	RRD1		1.08147	0.007	1.06559	0.025	0.0153	0.007	1e-05	status=JK
YIL154C	IMP2'		1.04947	0.027	1.06976	0.016	-0.01715	0.026	0
YIL155C	GUT2		0.99869	0.032	0.94197	0.068	0.04945	0.032	1e-05
YIL156W	UBP7		0.98157	0.078	1.10818	0.036	-0.13036	0.078	0.00014
YIL157C	COA1		0.99983	0.062	1.01	0.021	0.00189	0.062	6e-05
YIL158W	AIM20		1.02422	0.072	1.02498	0.079	-0.00533	0.072	0.0001
YIL159W	BNR1		0.86941	0.184	0.9492	0.174	-0.11395	0.184	0.00252
[truncated: 2,323 more rows]

## Sheet: DMA LU Rep2
Array ORF	Array Name	Array annotation	Normalized colony size (EXPERIMENT)	Normalized colony std. dev. (EXPERIMENT)	Normalized colony size (CONTROL)	Normalized colony std. dev. (CONTROL)	Score	Score stdev	p-Value	Additional information
YAL002W	VPS8		0.85417	0.096	1.0793	0.046	-0.22188	0.096	0.00039
YAL004W	YAL004W		0.93366	0.035	1.02718	0.099	-0.10411	0.035	1e-05
YAL005C	SSA1		0.96916	0.059	0.99415	0.034	-0.02266	0.059	6e-05
YAL007C	ERP2		0.95616	0.015	0.98744	0.057	-0.01976	0.015	8e-05	status=JK
YAL008W	FUN14		1.09347	0.06	1.06581	0.069	0.0371	0.06	5e-05
YAL010C	MDM10		0.86955	0.011	0.79906	0.075	0.07456	0.011	0
YAL011W	SWC3		1.17215	0.018	1.03871	0.048	0.14435	0.018	8e-05	status=JK
YAL013W	DEP1		0.73904	0.055	0.78795	0.063	-0.05943	0.055	0.00011
YAL014C	SYN8		1.1251	0.077	1.13755	0.045	-0.02069	0.076	9e-05
YAL015C	NTG1		1.0883	0.028	1.00057	0.042	0.10819	0.028	0.00022	status=JK
YAL017W	PSK1		1.02641	0.015	1.01715	0.004	0.01288	0.015	7e-05	status=JK
YAL018C	YAL018C		1.04842	0.117	0.96513	0.046	0.07982	0.117	0.00038
YAL019W	FUN30		1.07333	0.066	1.02349	0.009	0.05223	0.066	6e-05
YAL020C	ATS1		0.96472	0.042	0.93846	0.011	0.03305	0.042	2e-05
YAL022C	FUN26		0.99869	0.042	1.03757	0.059	-0.0447	0.042	2e-05
YAL023C	PMT2		0.97776	0.06	1.05587	0.031	-0.07386	0.06	6e-05
YAL024C	LTE1		0.84231	0.084	0.85136	0.032	-0.00685	0.083	0.00027
YAL026C	DRS2		0.73603	0.083	0.6234	0.036	0.10485	0.082	0.00039
YAL027W	SAW1		1.08312	0.039	1.03582	0.118	0.05077	0.038	1e-05
YAL028W	FRT2		0.96884	0.004	1.01323	0.109	-0.07681	0.004	1e-05	status=JK
YAL029C	MYO4		1.00093	0.028	0.95316	0.034	0.05688	0.028	1e-05
YAL030W	SNC1		0.96067	0.076	1.06274	0.052	-0.0955	0.076	0.00013
YAL031C	GIP4		0.99688	0.052	1.03556	0.051	-0.02283	0.052	4e-05
YAL034C	FUN19		1.05261	0.086	1.03882	0.013	0.00829	0.086	0.00015
YAL036C	RBG1		0.96542	0.047	0.92365	0.03	0.03665	0.047	3e-05
YAL037W	YAL037W		1.01844	0.031	0.96533	0.023	0.05534	0.03	1e-05
YAL040C	CLN3		0.99234	0.05	1.00404	0.045	-0.02148	0.05	4e-05
YAL042W	ERV46		1.03718	0.006	1.06179	0.021	-0.01073	0.006	1e-05	status=JK
YAL043C-A	YAL043C-A		0.96302	0.086	1.20829	0.095	-0.22904	0.085	0.00019
YAL045C	YAL045C		1.07422	0.079	0.95608	0.09	0.10791	0.079	0.00011
YAL046C	AIM1		1.00115	0.032	0.99411	0.012	0.01176	0.032	1e-05
YAL048C	GEM1		0.96887	0.023	0.886	0.169	0.04323	0.023	0
YAL049C	AIM2		0.97918	0.093	0.98705	0.039	-0.00151	0.093	0.00023
YAL051W	OAF1		0.97647	0.065	0.96851	0.037	0.00967	0.065	8e-05
YAL053W	FLC2		1.06254	0.026	1.07133	0.02	-0.00232	0.026	0
YAL054C	ACS1		0.98707	0.013	1.15412	0.039	-0.16106	0.013	6e-05	status=JK
YAL055W	PEX22		1.04251	0.002	0.93151	0.052	0.11869	0.002	0	status=JK
YAL056W	GPB2		0.90771	0.01	0.8166	0.019	0.09943	0.01	4e-05	status=JK
YAL058C-A	YAL058C-A		1.03745	0.029	1.06826	0.053	-0.04407	0.029	1e-05
YAL058W	CNE1		1.05437	0.054	1.13254	0.059	-0.06102	0.054	4e-05
YAL059W	ECM1		0.99378	0.054	0.92166	0.063	0.07721	0.054	4e-05
YAL060W	BDH1		0.95049	0.093	0.93763	0.097	0.02169	0.092	0.00025
YAL061W	BDH2		0.91276	0.081	1.13128	0.119	-0.24545	0.081	0.00019
YAL062W	GDH3		1.16804	0.045	1.02854	0.039	0.13942	0.045	2e-05
YAL064C-A	TDA8		1.08145	0.033	1.01304	0.091	0.06583	0.033	0.00032	status=JK
YAL065C	YAL065C		0.99529	0.068	1.06472	0.08	-0.07221	0.068	9e-05
YAL066W	YAL066W		1.10915	0.119	1.11079	0.031	-0.00059	0.119	0.00033
YAL067C	SEO1		0.98069	0.09	0.96872	0.016	0.01461	0.09	0.00021
YAL068C	PAU8		1.08328	0.059	1.0679	0.012	0.01383	0.058	4e-05
YAR002C-A	ERP1		1.01748	0.068	1.07687	0.035	-0.05225	0.068	8e-05
YAR002W	NUP60		1.01317	0.056	1.0324	0.028	-0.0243	0.056	5e-05
YAR003W	SWD1		0.93839	0.071	0.88317	0.064	0.06519	0.071	0.00012
YAR014C	BUD14		0.76181	0.074	0.79946	0.112	0.00195	0.074	0.00025
YAR015W	ADE1		0.95024	0.063	1.06389	0.034	-0.11098	0.062	8e-05
YAR018C	KIN3		0.98338	0.061	0.97057	0.117	-0.01341	0.061	0.00127	status=JK
[truncated: 4,267 more rows]

## Sheet: TSv6 U Rep1
Array ORF	Array Name	Array annotation	Normalized colony size (EXPERIMENT)	Normalized colony std. dev. (EXPERIMENT)	Normalized colony size (CONTROL)	Normalized colony std. dev. (CONTROL)	Score	Score stdev	p-Value	Additional information
[truncated: 1,227 more rows]

[truncated: 3 more sheets: TSv6 U Rep2, TSv6 LU Rep1, TSv6 LU Rep2]
