# Supplementary material for: Genetic profiling of protein burden and nuclear export overload
Source: eLife journal article supplement (doi:10.7554/elife.54080), 2020-11-04
Supplement: supp [file elife-54080-supp-v1.zip › elife_poa_e54080_Figure_5_source_data_3.xlsx]

## Sheet: Isolated mutants
Array ORF	Array Name	Array annotation	GFP	tGFP	NES-tGFP
YER045C	ACA1	DMA	0	0	-0.1295
YLR144C	ACF2	DMA	0	0	0.1961
YAR015W	ADE1	DMA	0	0	-0.1637
YGR061C	ADE6	DMA	-0.1698	0	0
YBR145W	ADH5	DMA	0.2707	0	0.2224
YNR044W	AGA1	DMA	0	-0.1349	0
YCL025C	AGP1	DMA	-0.2194	0	0
YER093C-A	AIM11	DMA	0.2005	0.2184	0.1903
YGL160W	AIM14	DMA	0.1812	0	0
YJL046W	AIM22	DMA	0.2097	0	0
YBR194W	AIM4	DMA	0.3167	0.2955	0
YDL175C	AIR2	DMA	0.2317	0	0.2423
YPL227C	ALG5	DMA	-0.1374	0	0
YLR089C	ALT1	DMA	0.2112	0	0
YPL259C	APM1	DMA	0	0	-0.1592
YDL192W	ARF1	DMA	0	0	0.2122
YOL058W	ARG1	DMA	0.2704	-0.223	0
YJL071W	ARG2	DMA	0.1892	0	0
YJL088W	ARG3	DMA	0.2652	0	0
YER069W	ARG5	DMA	0.4031	0	0.1825
YDR173C	ARG82	DMA	0	0.218	0
YDR127W	ARO1	DMA	0.2952	0.3098	0.2871
YPR060C	ARO7	DMA	0.2518	0.3055	0.4137
YGL202W	ARO8	DMA	0	0	-0.173
YLR085C	ARP6	DMA	0	0	0.3454
YBL078C	ATG8	DMA	-0.1566	0	0
YLR393W	ATP10	DMA	0.1623	0.1606	0
YML081C-A	ATP18	DMA	0.1951	0	0
YNR020C	ATP23	DMA	0.1905	0	0
YKR099W	BAS1	DMA	-0.2385	0	0
YDR375C	BCS1	DMA	0.275	0	0
YAL061W	BDH2	DMA	0	0	-0.2313
YBR200W	BEM1	DMA	-0.3051	0	0
YPL161C	BEM4	DMA	0	0	-0.3167
YKL061W	BLI1	DMA	-0.1403	0	0
YDR099W	BMH2	DMA	0	0	-0.1365
YNR051C	BRE5	DMA	0	0	-0.1585
YPR057W	BRR1	DMA	0	-0.1878	0
YGL174W	BUD13	DMA	0	-0.2286	-0.1836
YOR078W	BUD21	DMA	0	-0.2634	-0.2004
YCR063W	BUD31	DMA	-0.2283	0	0
YML042W	CAT2	DMA	0	0	-0.351
YMR280C	CAT8	DMA	0	-0.1353	0
YPL178W	CBC2	DMA	0	-0.2673	0
YLR308W	CDA2	DMA	0	0	-0.1262
YGR157W	CHO2	DMA	0.337	0.1728	0.2517
YMR198W	CIK1	DMA	-0.3422	0	0.2015
YMR012W	CLU1	DMA	0	0	0.1939
YKL137W	CMC1	DMA	0.2869	0	0.2408
YLR003C	CMS1	DMA	0	0	-0.1592
YHR146W	CRP1	DMA	0.1617	0	0
YNR010W	CSE2	DMA	0.2961	0	0.2563
YLR087C	CSF1	DMA	-0.298	0	0
YBR036C	CSG2	DMA	0.3347	0	0
YMR048W	CSM3	DMA	0	0	-0.1257
YLR394W	CST9	DMA	0	0	-0.2837
YKL139W	CTK1	DMA	0	0.1616	0
YIR023W	DAL81	DMA	0.1648	0	0
YKR024C	DBP7	DMA	0.191	0	0
YKL149C	DBR1	DMA	0	0	0.1648
YCL016C	DCC1	DMA	-0.1355	0	0
YER143W	DDI1	DMA	0	-0.1343	0
YOR030W	DFG16	DMA	0	0	-0.2065
YKR035W-A	DID2	DMA	-0.2342	0	0
YMR126C	DLT1	DMA	0	0	-0.1844
YHR043C	DOG2	DMA	0	-0.1362	0
YGL196W	DSD1	DMA	-0.1615	0	0
YGL043W	DST1	DMA	0.3393	0	0.1869
YLR401C	DUS3	DMA	0	0	0.2076
YLR405W	DUS4	DMA	0	0	-0.1735
YDR359C	EAF1	DMA	0	0.2328	0
YPR023C	EAF3	DMA	0.27	0	0
YHL030W	ECM29	DMA	0	-0.2723	0
YBL047C	EDE1	DMA	-0.129	0	0
YPL037C	EGD1	DMA	0.1864	0.181	0
YKL048C	ELM1	DMA	-0.2114	0	0
YDR512C	EMI1	DMA	0.1942	0	0.2027
YLR083C	EMP70	DMA	-0.1383	0	0
YLR056W	ERG3	DMA	0.1649	0	0
YGL054C	ERV14	DMA	0	0	-0.1878
YLR233C	EST1	DMA	0.3857	0.3056	0.2144
YBR026C	ETR1	DMA	0	-0.1663	0
YJL157C	FAR1	DMA	0	0	0.3775
YCR034W	FEN1	DMA	0	0	-0.1232
YPL221W	FLC1	DMA	0	0	-0.1601
YIL134W	FLX1	DMA	0.4917	0.2964	0.373
YBL013W	FMT1	DMA	0	0.1823	0
YLL043W	FPS1	DMA	0	0	-0.1689
YLR214W	FRE1	DMA	0	0	-0.2467
YLR047C	FRE8	DMA	-0.1641	0	0
YMR222C	FSH2	DMA	0	0	0.1963
YOR280C	FSH3	DMA	-0.16	0	0
YMR232W	FUS2	DMA	0	0	-0.2526
YBL016W	FUS3	DMA	-0.344	0	0
YAL062W	GDH3	DMA	0	0	0.1739
YOL056W	GPM3	DMA	0	0	-0.1229
YDL035C	GPR1	DMA	0	0	-0.1223
YOL151W	GRE2	DMA	0	0	-0.1552
YJR090C	GRR1	DMA	0.2273	0	0
YDL010W	GRX6	DMA	-0.1434	0	0
YML048W	GSF2	DMA	0	0.1706	0
YJL101C	GSH1	DMA	0.2535	0	0.1739
YGL084C	GUP1	DMA	-0.179	0	0
YBL021C	HAP3	DMA	0.1931	0	0
YPR179C	HDA3	DMA	-0.1297	0	-0.1887
YMR207C	HFA1	DMA	-0.2244	0	0
YBR009C	HHF1	DMA	-0.1452	0	-0.1504
YER055C	HIS1	DMA	0.3315	0	0
YFR025C	HIS2	DMA	0.3308	0	0
YCL030C	HIS4	DMA	0.3523	0	0
YIL116W	HIS5	DMA	0.3821	0	0
YBR248C	HIS7	DMA	0.229	0	0
YDR291W	HRQ1	DMA	0	0	0.2062
YDR171W	HSP42	DMA	0.1775	0	0
YGR223C	HSV2	DMA	0	-0.1223	0
YGR268C	HUA1	DMA	0	0	0.3684
YGL168W	HUR1	DMA	-0.2324	0	0
YPL244C	HUT1	DMA	-0.1233	0	0
YIL090W	ICE2	DMA	0.203	-0.155	0
YLR099C	ICT1	DMA	-0.1475	0	0
YOR189W	IES4	DMA	-0.183	0	0
YER092W	IES5	DMA	0.18	0	0
YJL106W	IME2	DMA	-0.1387	0	0
YCR071C	IMG2	DMA	0.2448	0	0
YIL154C	IMP2'	DMA	-0.1291	0	0
YDR123C	INO2	DMA	0.1852	0	0
YMR204C	INP1	DMA	0	-0.2233	-0.1628
YOL081W	IRA2	DMA	0.4151	0	0
YLR021W	IRC25	DMA	0	0	-0.14
YPL135W	ISU1	DMA	0.1675	0	0
YBR245C	ISW1	DMA	0	0	-0.123
YKL032C	IXR1	DMA	0.1731	0	0.1897
YPR141C	KAR3	DMA	0	0	0.316
YAR018C	KIN3	DMA	-0.3484	0	0
YJL062W	LAS21	DMA	0	-0.1297	0
YPL213W	LEA1	DMA	0	0	-0.2163
YGL009C	LEU1	DMA	0.4506	0	0.2986
YNL104C	LEU4	DMA	0	0	0.1784
YJR070C	LIA1	DMA	0	-0.1482	0
YOR196C	LIP5	DMA	0	-0.1715	0
YFL018C	LPD1	DMA	0	-0.1364	0
YDL240W	LRG1	DMA	-0.1944	0	0
YHR081W	LRP1	DMA	0	0	0.273
YOR142W	LSC1	DMA	0	0.4123	0.4369
YAL024C	LTE1	DMA	-0.2365	-0.3004	0
YIR034C	LYS1	DMA	0.2376	0	0
YIL094C	LYS12	DMA	0.3901	0	0.2024
YBR115C	LYS2	DMA	0.3139	0	0.2167
YDR234W	LYS4	DMA	0.2833	0	0.2234
YGL154C	LYS5	DMA	0.1651	0	0
YMR021C	MAC1	DMA	-0.3194	0	0
YOR197W	MCA1	DMA	-0.1589	0	0
YOR306C	MCH5	DMA	-0.1778	0	-0.1428
YOL126C	MDH2	DMA	0	0	0.1764
YPR070W	MED1	DMA	0.2981	0	0.1915
YER044C-A	MEI4	DMA	-0.1243	0	0
YOL064C	MET22	DMA	0	-0.1246	0
YML062C	MFT1	DMA	0	0	0.1869
YCL044C	MGR1	DMA	0.2409	0	0
YPL098C	MGR2	DMA	0.242	0	0
YNL076W	MKS1	DMA	0.2553	0	0
YNL117W	MLS1	DMA	0.2286	0	0
YLR190W	MMR1	DMA	-0.5369	-0.228	0
YLR320W	MMS22	DMA	0.1965	0	0.2615
YBR015C	MNN2	DMA	-0.1597	0	-0.1386
YGL124C	MON1	DMA	0	0	-0.128
YDR116C	MRPL1	DMA	0.2949	0	0.2547
YKL062W	MSN4	DMA	0.199	0	0
YPR134W	MSS18	DMA	0.2486	0	0.2561
YBR255W	MTC4	DMA	0	-0.1209	0
YDR128W	MTC5	DMA	0	-0.1332	0
YGL236C	MTO1	DMA	0.215	0	0
YBR119W	MUD1	DMA	-0.1549	0	0
YKL074C	MUD2	DMA	0	-0.2346	0
YOR298W	MUM3	DMA	0	0	-0.1706
YGR206W	MVB12	DMA	-0.1509	0	0
YKR048C	NAP1	DMA	-0.1311	0	0
YGL211W	NCS6	DMA	0.1677	0	0
YMR145C	NDE1	DMA	0	0	-0.1291
YLR315W	NKP2	DMA	0	-0.1628	-0.2737
YOL041C	NOP12	DMA	-0.1363	-0.1758	0
YHL023C	NPR3	DMA	0	0	0.1957
YOL043C	NTG2	DMA	0	0	-0.1307
YKR082W	NUP133	DMA	0	0	-0.1749
YBL079W	NUP170	DMA	0	0	-0.2844
YML103C	NUP188	DMA	-0.3	0	-0.3018
YHL029C	OCA5	DMA	-0.1695	0	0
YJR073C	OPI3	DMA	0.3072	0.2817	0.3806
YPR194C	OPT2	DMA	-0.1484	0	0
YGR078C	PAC10	DMA	-0.1206	0	0
YCR077C	PAT1	DMA	-0.1941	0	0
YLR134W	PDC5	DMA	0	0	-0.1907
YOR360C	PDE2	DMA	0.3778	0.1951	0.1795
YKR046C	PET10	DMA	0	0	-0.1604
YGR132C	PHB1	DMA	0.1645	0.1723	0.2117
YGR231C	PHB2	DMA	0	0.2254	0.2946
YDL106C	PHO2	DMA	-0.1267	0	0
YOL001W	PHO80	DMA	0.1895	0	0
YHR034C	PIH1	DMA	0	-0.1335	0
YMR123W	PKR1	DMA	-0.1988	0	0
YML107C	PML39	DMA	0	0	-0.1595
YGL167C	PMR1	DMA	-0.2264	0	0
YLR014C	PPR1	DMA	-0.1373	0	0
YML016C	PPZ1	DMA	0	0	-0.1658
YAL017W	PSK1	DMA	-0.2266	0	0
YMR137C	PSO2	DMA	0	0	-0.1428
YCR079W	PTC6	DMA	-0.154	-0.1351	0
YHR189W	PTH1	DMA	0.3088	0	0
YJR059W	PTK2	DMA	0.1686	0	0
YOR208W	PTP2	DMA	-0.2079	0	0
YKR090W	PXL1	DMA	0	-0.1225	0
YJL204C	RCY1	DMA	0.2281	0	0
YPL066W	RGL1	DMA	0.1746	0	0
YMR154C	RIM13	DMA	0	0	-0.2062
YLR371W	ROM2	DMA	0.2835	0.2136	0
YJL177W	RPL17B	DMA	0	0	-0.1314
YBR084C-A	RPL19A	DMA	-0.2098	-0.1616	-0.2036
YOR312C	RPL20B	DMA	-0.1533	0	-0.3263
YPL079W	RPL21B	DMA	0	-0.1331	0
YLR061W	RPL22A	DMA	0.1683	0.3424	0
YBL087C	RPL23A	DMA	0	0	-0.1302
YLR406C	RPL31B	DMA	0	0	-0.2843
YDL191W	RPL35A	DMA	0	-0.1206	0
YPR043W	RPL43A	DMA	0.1687	0.1633	0.2545
YLR448W	RPL6B	DMA	-0.1877	-0.1549	0
YHL033C	RPL8A	DMA	0	-0.1666	0
YLL045C	RPL8B	DMA	-0.2239	0	0
YDL020C	RPN4	DMA	0	-0.1503	0
YFL036W	RPO41	DMA	-0.1522	0	0
YML063W	RPS1B	DMA	-0.1689	0	-0.1364
YJL136C	RPS21B	DMA	0.186	0	0
YLR333C	RPS25B	DMA	0	0	0.1646
YLR264W	RPS28B	DMA	0	0	-0.1644
YDL061C	RPS29B	DMA	0.2195	0	0
YNL096C	RPS7B	DMA	0	0	-0.1731
YHR031C	RRM3	DMA	-0.1984	0	0
YBL025W	RRN10	DMA	0.3057	0	0
YOR001W	RRP6	DMA	0.3343	0	0
YLR221C	RSA3	DMA	0	0	-0.1765
YLR357W	RSC2	DMA	0.4807	0.2826	0
YMR030W	RSF1	DMA	0	0	-0.1436
YBR147W	RTC2	DMA	-0.1791	0	0
YGL244W	RTF1	DMA	0	0	0.2622
YOL067C	RTG1	DMA	0	-0.2499	0
YGR275W	RTT102	DMA	0	0	-0.1406
YBR095C	RXT2	DMA	0.3349	0	0
YDR159W	SAC3	DMA	0	0.3826	0.2842
YDR389W	SAC7	DMA	-0.2903	-0.1696	0
YMR127C	SAS2	DMA	-0.1417	0	-0.2804
YMR272C	SCS7	DMA	0.2893	0	0
YGR279C	SCW4	DMA	0	-0.2168	0
YIL084C	SDS3	DMA	0.3191	0	0
YLR268W	SEC22	DMA	0.1678	0	0
YIL076W	SEC28	DMA	0.2083	0	0
YBL066C	SEF1	DMA	0	0	-0.1212
YGL066W	SGF73	DMA	0	0	0.2334
YOR035C	SHE4	DMA	-0.2404	-0.1265	0
YOL004W	SIN3	DMA	0	-0.3976	0
YKR101W	SIR1	DMA	-0.1403	-0.1449	-0.2508
YDR409W	SIZ1	DMA	-0.1341	-0.1449	-0.1413
YOR076C	SKI7	DMA	-0.1362	-0.1762	-0.2242
YGR143W	SKN1	DMA	0.1639	0	0
YBL007C	SLA1	DMA	-0.2761	0	0
YOR008C	SLG1	DMA	0.1951	-0.186	0
YHR030C	SLT2	DMA	-0.3578	-0.2421	0
YDL013W	SLX5	DMA	0.3531	0	0
YGR081C	SLX9	DMA	0	0	-0.3287
YOR307C	SLY41	DMA	-0.1559	0	-0.3968
YLR034C	SMF3	DMA	0.2453	0	0
YDR477W	SNF1	DMA	0	0	0.2363
YHL025W	SNF6	DMA	0.1744	0	0
YCR033W	SNT1	DMA	-0.1373	0	0
YOR308C	SNU66	DMA	-0.24	-0.2855	0
YGL127C	SOH1	DMA	0.2685	0	0.2197
YKL184W	SPE1	DMA	0	0	0.1769
YKR031C	SPO14	DMA	0	-0.1457	0
YHR153C	SPO16	DMA	0.2042	0.2109	0.1774
YDR392W	SPT3	DMA	0.2036	0	0.2159
YCR081W	SRB8	DMA	0.245	0	0
YDL133W	SRF1	DMA	0	0	-0.1255
YLR082C	SRL2	DMA	-0.1636	0	0
YLR119W	SRN2	DMA	-0.1545	-0.1361	0
YCL037C	SRO9	DMA	0	-0.2116	0
YLR452C	SST2	DMA	0	0	-0.2156
YJR117W	STE24	DMA	0.2171	0	0
YCL032W	STE50	DMA	0.2209	0	0.2366
YOR027W	STI1	DMA	0	0	-0.1395
YDR463W	STP1	DMA	0.1613	0	0
YMR039C	SUB1	DMA	0.2555	0	0
YPL057C	SUR1	DMA	0.4514	0	0
YLR372W	SUR4	DMA	0	0	-0.3058
YAL011W	SWC3	DMA	0	0	0.1655
YDR395W	SXM1	DMA	0.2061	0.1737	0.2004
YPR095C	SYT1	DMA	0.2693	0	0
YOL020W	TAT2	DMA	0	-0.1387	0
YBR118W	TEF2	DMA	0.2186	0	0.2201
YPL258C	THI21	DMA	-0.134	0	-0.1494
YDL080C	THI3	DMA	0	-0.2639	-0.1968
YPR045C	THP3	DMA	0	0	0.179
YHR025W	THR1	DMA	-0.2368	-0.1545	0
YPR074C	TKL1	DMA	0.1872	0	0.2654
YOL006C	TOP1	DMA	0	-0.1746	0
YLR234W	TOP3	DMA	0	0	-0.1605
YLR183C	TOS4	DMA	-0.1595	0	-0.2427
YBR126C	TPS1	DMA	-0.198	-0.1728	-0.3649
YDR074W	TPS2	DMA	-0.1686	-0.1441	-0.2166
YDR165W	TRM82	DMA	0	0	-0.1741
YER090W	TRP2	DMA	0	0	-0.1301
YLR425W	TUS1	DMA	0.2273	0	0
YBR082C	UBC4	DMA	-0.1711	0	-0.383
YDR059C	UBC5	DMA	-0.1399	0	0
YER151C	UBP3	DMA	0	0.187	0
YMR223W	UBP8	DMA	0.1655	0.1627	0
YBR273C	UBX7	DMA	-0.14	0	0
YOR191W	ULS1	DMA	0	0	-0.1211
YDR207C	UME6	DMA	0.2991	0.212	0.2884
YLR193C	UPS1	DMA	0	0	-0.1754
YJL130C	URA2	DMA	0.3544	0	0
YML029W	USA1	DMA	0	0	-0.1281
YNL054W	VAC7	DMA	0	0	-0.1311
YOR106W	VAM3	DMA	0	-0.2623	0
YDL077C	VAM6	DMA	0	-0.1491	-0.164
YGL212W	VAM7	DMA	0	-0.1309	-0.1788
YCL069W	VBA3	DMA	-0.1216	0	0
YLR373C	VID22	DMA	0.287	0	0
YLR410W	VIP1	DMA	0	-0.1772	0
YOR270C	VPH1	DMA	0	0	-0.1907
YKR001C	VPS1	DMA	-0.2092	0	0
YLL040C	VPS13	DMA	-0.2522	0	0
YOR089C	VPS21	DMA	-0.1673	-0.1513	0
YKL041W	VPS24	DMA	-0.1873	-0.1887	0
YNR006W	VPS27	DMA	-0.1649	0	0
YHR012W	VPS29	DMA	0	-0.1524	0
YPR173C	VPS4	DMA	0	0	0.1683
YOR069W	VPS5	DMA	0	-0.2135	0
YKR020W	VPS51	DMA	0	-0.1245	0
YAL002W	VPS8	DMA	-0.4453	-0.1806	-0.222
YLR337C	VRP1	DMA	0.3149	0.1666	0
YAL004W	YAL004W	DMA	0	-0.1251	0
YAL043C-A	YAL043C-A	DMA	0	0	-0.205
YBL083C	YBL083C	DMA	-0.1223	0	0
YBR137W	YBR137W	DMA	0.3173	0.1616	0
YBR220C	YBR220C	DMA	-0.1715	0	0
YBR224W	YBR224W	DMA	-0.1548	0	0
YBR238C	YBR238C	DMA	0.1618	0	0
YLL048C	YBT1	DMA	0.1671	0	0
YCL062W	YCL062W	DMA	0	0	-0.2004
YCR061W	YCR061W	DMA	0.1679	0	0
YNL064C	YDJ1	DMA	0	-0.2787	-0.1681
YDL062W	YDL062W	DMA	-0.1213	0	0
YDL096C	YDL096C	DMA	0	0	-0.136
YDL180W	YDL180W	DMA	-0.1666	0	0
YDR042C	YDR042C	DMA	-0.2735	0	-0.2679
YDR048C	YDR048C	DMA	-0.1906	0	-0.1643
YDR157W	YDR157W	DMA	-0.1428	0	0
YDR525W	YDR525W	DMA	-0.1504	0	0
YDR541C	YDR541C	DMA	0	0	-0.1215
YER135C	YER135C	DMA	0	0	-0.2446
YGL007W	YGL007W	DMA	0	-0.1414	0
YGL024W	YGL024W	DMA	0.5522	-0.1216	0.3988
YGL149W	YGL149W	DMA	-0.1285	0	-0.1715
YGL218W	YGL218W	DMA	0.3689	0.1944	0
YGL235W	YGL235W	DMA	0.1675	0	0
YHR035W	YHR035W	DMA	0	0.1636	0
YHR045W	YHR045W	DMA	-0.1258	0	0
YHR127W	YHR127W	DMA	-0.2397	0	0
YJL119C	YJL119C	DMA	-0.1339	-0.2439	-0.1941
YJL175W	YJL175W	DMA	0.2727	0	0.1947
YJR087W	YJR087W	DMA	0.1849	0	0
YLR200W	YKE2	DMA	0	0	-0.1865
YKL023W	YKL023W	DMA	0.1663	0.1881	0
YKL053W	YKL053W	DMA	0.2127	0	0
YKL069W	YKL069W	DMA	0	0	-0.2235
YKR035C	YKR035C	DMA	0	-0.1375	0
YLR031W	YLR031W	DMA	0	0	-0.1362
YLR036C	YLR036C	DMA	0	0	0.2659
YLR111W	YLR111W	DMA	0	0	-0.2904
YLR118C	YLR118C	DMA	0	0	0.1753
YLR169W	YLR169W	DMA	0	0	0.2
YLR179C	YLR179C	DMA	0	0	0.2055
YLR236C	YLR236C	DMA	0	0	-0.2191
YLR294C	YLR294C	DMA	0.1604	0	0
YLR311C	YLR311C	DMA	0	0	0.1693
YLR312C	YLR312C	DMA	0	0	0.2015
YLR338W	YLR338W	DMA	0	0	-0.2206
YPR024W	YME1	DMA	0.2607	0	0.1807
YML010C-B	YML010C-B	DMA	0	-0.1276	0
YMR031W-A	YMR031W-A	DMA	0	0.2254	0
YNL046W	YNL046W	DMA	-0.1215	0	0
YNR005C	YNR005C	DMA	-0.1931	0	-0.1795
YOR082C	YOR082C	DMA	0	-0.154	-0.1341
YOR139C	YOR139C	DMA	0	0	-0.1315
YOR309C	YOR309C	DMA	0	0	-0.2257
YOR366W	YOR366W	DMA	-0.2013	0	0
YDR057W	YOS9	DMA	0	0	-0.1718
YPL080C	YPL080C	DMA	0	0	-0.1328
YPL205C	YPL205C	DMA	0	0.1879	0
YPL261C	YPL261C	DMA	-0.1419	-0.1479	-0.139
YPR044C	YPR044C	DMA	0.1801	0	0.2325
YPR092W	YPR092W	DMA	-0.21	0	-0.1438
YGR270W	YTA7	DMA	0	0.3788	0.3546
YDR002W	YRB1	yrb1-51	0	0	-0.2711
YKL196C	YKT6	ykt6-ph	0.1673	0	0
YKL095W	YJU2	yju2-ph	0	0.2445	0
YMR197C	VTI1	vti1-11	0.1756	0	0
YHR196W	UTP9	utp9-ph	0	0	-0.1914
YDR449C	UTP6	ydr449c-ph	0	0	-0.2505
YOR004W	UTP23	utp23-ph	-0.1472	0	0
YMR093W	UTP15	ymr093w-ph	0	0	-0.218
YKL024C	URA6	ura6-5	-0.2418	0	0
YLR212C	TUB4	tub4-y445d	0	0	-0.1781
YDL015C	TSC13	tsc13-ph	0	0	-0.5245
YER093C	TSC11	tsc11-1	0.3075	0	0
YOL102C	TPT1	yol102c-ph	-0.1856	0	0
YDR050C	TPI1	tpi1-1670	-0.1641	0	0
YPL063W	TIM50	tim50-ph	0	-0.1651	0
YIL022W	TIM44	tim44-8	0.203	-0.1518	0
YNR017W	TIM23	tim23-ph	0.2278	0	0
YDL217C	TIM22	tim22-19	0	0.1905	0
YPR016C	TIF6	ypr016c-ph	-0.1745	0	0
YDR460W	TFB3	tfb3-ts	0.3799	0	0
YDR311W	TFB1	tfb1-1	0.3394	0	0
YDR311W	TFB1	tfb1-6	-0.3368	-0.3902	-0.4287
YKR062W	TFA2	tfa2-45	0.3178	0.225	0
YDR212W	TCP1	tcp1-2	-0.1686	0	0
YPL128C	TBF1	tbf1-ph	0	0	-0.2979
YMR028W	TAP42	tap42-11	-0.1841	-0.1314	0
YBR198C	TAF5	taf5-20	0	-0.1506	-0.1842
YMR005W	TAF4	taf4-18	0	-0.2498	0
YLR316C	TAD3	tad3-ph	0	0	-0.2949
YDR416W	SYF1	ydr416w-ph	-0.2284	0	0
YKL018W	SWD2	swd2-1	0.1665	0	0
YGR002C	SWC4	swc4-4	-0.4738	0	0
YDR172W	SUP35	sup35-td	0.6837	0.1829	0
YPR086W	SUA7	ypr086w-ph	0.4219	0	0
YLR045C	STU2	stu2-10	0	0.2742	0
YBL034C	STU1	stu1-5	0	0	0.1699
YBL034C	STU1	stu1-8	0.172	0	0
YLR305C	STT4	stt4-4	0	0	0.2235
YGL022W	STT3	stt3-1	-0.1334	0	-0.194
YGL022W	STT3	stt3-2	-0.331	0	0
YGL022W	STT3	stt3-7	-0.2271	0	-0.1225
YLR005W	SSL1	ssl1-t242i	0.4998	0	0
YNL138W	SRV2	srv2-2	-0.1512	0	-0.1859
YKL154W	SRP102	srp102-510	0	0	0.1647
YDR292C	SRP101	srp101-47	0	0.2371	0
YGR116W	SPT6	spt6-14	0	-0.176	0
YER148W	SPT15	spt15-i143n	0.2335	0	0
YPR133C	SPN1	spn1-k192n	0	-0.2432	0
YNL126W	SPC98	spc98-ph	0	0	-0.1815
YKL042W	SPC42	spc42-10	0.3831	0.2256	0
YKL042W	SPC42	spc42-11	0	0	0.1872
YKR037C	SPC34	spc34-5	0.4359	0.1803	0
YMR117C	SPC24	spc24-9	-0.5877	0	0
YDR356W	SPC110	spc110-220	0	0	-0.2205
YIL061C	SNP1	yil061c-ph	0.2557	0	0
YOR149C	SMP3	smp3-1	0	0	-0.1597
YLR086W	SMC4	smc4-1	0.2037	0	0
YFR031C	SMC2	smc2-8	0	0	0.2251
YBR156C	SLI15	sli15-3	0	0.1669	0
YGL113W	SLD3	sld3-ph	0.3239	0.3198	0
YGR195W	SKI6	ski6-ph	0.5718	0.4092	0
YPR161C	SGV1	sgv1-35	0	-0.223	0
YPR161C	SGV1	sgv1-80	0.185	-0.1503	0
YOR057W	SGT1	sgt1-5	-0.3388	-0.2109	0
YKL006C-A	SFT1	sft1-15	0.3128	0.2884	0
YLR430W	SEN1	sen1-1	0.293	0	0
YLR026C	SED5	sed5-1	0.3082	0.1853	0
YPL094C	SEC62	sec62-ts	0.1621	0	0
YFL045C	SEC53	sec53-6	0	-0.1328	0
YGL137W	SEC27	sec27-1	0	0	-0.3342
YDR238C	SEC26	sec26-f856aw860a	-0.463	0	0
YIL109C	SEC24	sec24-20	0.2173	0	0
YPR181C	SEC23	sec23-1	-0.2843	0	0
YBR080C	SEC18	sec18-1	0	0	-0.2924
YGL233W	SEC15	sec15-1	-0.3484	0	0
YNR026C	SEC12	sec12-1	0.1768	0	0
YDR164C	SEC1	sec1-1	0.2396	0	0
YGR245C	SDA1	sda1-2	0	0.2152	0
YER125W	RSP5	rsp5-1	-0.1673	0	-0.1909
YER125W	RSP5	rsp5-sm1	0	0	-0.135
YDR280W	RRP45	rrp45-ph	0.2035	0	0
YDR087C	RRP1	rrp1-1	0	0	-0.142
YGL048C	RPT6	rpt6-1	0	-0.3257	-0.2553
YOR259C	RPT4	rpt4-145	0	0	-0.1859
YKL145W	RPT1	rpt1-1	0	0	-0.2822
YDL140C	RPO21	rpo21-1	0.1654	0	0
YPR108W	RPN7	rpn7-3	0	0	-0.2572
YDL147W	RPN5	rpn5-1	0	0	-0.1296
YDL147W	RPN5	rpn5-ph	0	0	-0.3358
YFR052W	RPN12	rpn12-1	0	-0.2726	0
YFR004W	RPN11	rpn11-14	-0.1461	0	-0.2004
YHR027C	RPN1	rpn1-821	0	-0.1861	-0.5878
YLR029C	RPL15A	ylr029c-ph	-0.1591	0	0
YKR081C	RPF2	rpf2-ph	-0.2716	-0.2903	-0.4323
YHR088W	RPF1	rpf1-1	0	0	-0.2017
YPR110C	RPC40	rpc40-v78r	0	0.1829	0
YNR003C	RPC34	rpc34-1	-0.4065	0	0
YJL011C	RPC17	yjl011c-ph	-0.1238	0	-0.248
YOR151C	RPB2	rpb2-6	0.2913	0	0
YBL093C	ROX3	rox3-182	0	-0.3294	-0.363
YMR200W	ROT1	rot1-ph	0	0	-0.166
YMR239C	RNT1	rnt1-47	0	-0.2743	0
YGL044C	RNA15	rna15-58	-0.1992	0	0
YMR235C	RNA1	rna1-1	0	0	-0.4407
YMR235C	RNA1	rna1-s116f	0	0	-0.2121
YLR145W	RMP1	rmp1-ts	0	0	-0.3555
YIL118W	RHO3	rho3-ser228	-0.24	0	0.1612
YPR165W	RHO1	rho1-td	0	0	-0.1728
YLR071C	RGR1	rgr1-100	0.4079	0	0
YPL010W	RET3	ret3-1	0	-0.1909	0
YPR094W	RDS3	rds3-1	0	-0.1559	0
YER171W	RAD3	rad3-ts14	0.3545	0	0
YER094C	PUP3	pup3-ph	0	-0.1633	-0.1633
YOR157C	PUP1	pup1-1	0	-0.2721	-0.2359
YJL072C	PSF2	yjl072c-ph	0	0.1642	0
YGL120C	PRP43	prp43-ts2	-0.3247	-0.4343	-0.296
YGR091W	PRP31	prp31-ts	-0.1394	0	0
YKR086W	PRP16	prp16-ts	0.1837	0	0
YBL041W	PRE7	pre7-ph	-0.3048	0	0
YOL038W	PRE6	pre6-ph	0	-0.2971	-0.1588
YFR050C	PRE4	pre4-ph	0	-0.2909	-0.5003
YPR103W	PRE2	pre2-v214a	0	-0.138	0
YOR362C	PRE10	yor362c-ph	0	-0.3261	-0.4774
YBR257W	POP4	pop4-ph	0.2055	0	0
YJR006W	POL31	pol31-ph	-0.2249	0	0
YDL102W	POL3	cdc2-7	-0.2507	-0.3831	-0.1232
YNL102W	POL1	pol1-12	-0.1968	0	0
YML069W	POB3	pob3-q308k	0.2867	0	0
YBL105C	PKC1	pkc1-2	0.2521	0	0
YJL097W	PHS1	phs1-ph	-0.1595	0	0
YCL004W	PGS1	ycl004w-ph	0	0	-0.2929
YDR081C	PDC2	ydr081c-ph	0.3534	0	0
YDR228C	PCF11	pcf11-ts9	0.2044	0	0
YCL052C	PBN1	pbn1-ph	-0.2494	0	0
YIR006C	PAN1	pan1-4	-0.2986	0	-0.1417
YJL104W	PAM16	pam16-3	0	-0.2305	-0.1438
YOR103C	OST2	ost2-ph	0.2711	0	0
YHR118C	ORC6	orc6-ph	0	0.2709	0
YPR162C	ORC4	ypr162c-ph	0	0.2659	0.1915
YBR060C	ORC2	orc2-1	0	0.3024	0
YBR060C	ORC2	orc2-2	0.1674	0.221	0
YBR060C	ORC2	orc2-4	0	0.1679	0
YML065W	ORC1	orc1-ph	0.4848	0.3638	0
YGL055W	OLE1	ole1-m2	0	0	-0.1662
YJR042W	NUP85	yjr042w-ph	-0.3855	0	0
YGR119C	NUP57	nup57-e17	0	-0.1623	-0.2833
YIL115C	NUP159	nup159-1	0	0	-0.303
YKR022C	NTR2	ykr022c-ph	0	0	-0.1473
YML023C	NSE5	nse5-ts2	-0.2095	0	0
YML023C	NSE5	nse5-ts3	-0.2606	0	-0.1246
YML023C	NSE5	nse5-ts4	0	0	-0.2627
YDL105W	NSE4	nse4-ph	-0.2187	0	-0.3171
YDL105W	NSE4	nse4-ts2	-0.4007	-0.3553	-0.2305
YDL105W	NSE4	nse4-ts4	0	0	-0.1521
YDR288W	NSE3	nse3-ph	0	0.3377	0
YDR288W	NSE3	nse3-ts3	0	0	-0.1533
YLR007W	NSE1	nse1-16	0	0	0.1741
YJR072C	NPA3	npa3-ph	0	-0.1995	0
YLR197W	NOP56	nop56-ph	-0.1733	0	0
YPL043W	NOP4	nop4-3	0	-0.3235	0
YNL061W	NOP2	nop2-3	-0.1632	0	0
YNL061W	NOP2	nop2-9	0.1893	0	0
YDL148C	NOP14	ydl148c-ph	0	-0.1511	-0.2832
YDL014W	NOP1	nop1-3	-0.1473	0	0
YJR112W	NNF1	nnf1-77	-0.1271	0	0
YLR195C	NMT1	nmt1-181	0	0	-0.1526
YOR326W	MYO2	myo2-14	-0.1556	0	0
YNR043W	MVD1	mvd1-1296	0	-0.1547	0
YJL050W	MTR4	mtr4-1	0.2809	0	0
YDL028C	MPS1	mps1-3796	-0.1205	0	-0.1549
YPL082C	MOT1	mot1-1033	0	-0.1355	0
YFL034C-B	MOB2	mob2-19	0	0	-0.1876
YFL034C-B	MOB2	mob2-20	0	0.1607	0
YFL034C-B	MOB2	mob2-22	-0.1234	0	-0.1686
YFL034C-B	MOB2	mob2-26	0	0	-0.2143
YFL034C-B	MOB2	mob2-28	0	-0.1363	0
YFL034C-B	MOB2	mob2-38	-0.166	0	-0.2513
YIL106W	MOB1	yil106w-ph	-0.2637	-0.3117	0
YOR232W	MGE1	mge1-100	0.2863	0	0
YGR264C	MES1	mes1-1	0.1815	0	0
YBR193C	MED8	med8-39	0.2098	0	0.1973
YHR058C	MED6	med6-ph	0.31	0.225	0
YHR058C	MED6	med6-ts	0	0.2233	0
YOR174W	MED4	med4-54	0.2794	0	0
YOR174W	MED4	med4-6	0.3241	0	0
YMR112C	MED11	med11-ts	0.5108	0	0
YBR202W	MCM7	cdc47-ts	0.2886	0.1904	0
YLR274W	MCM5	cdc46-1	0	0	-0.155
YBL023C	MCM2	mcm2-1	0	0.3387	0
YIL150C	MCM10	mcm10-1	0.3238	0.3345	0
YKL165C	MCD4	mcd4-174	0.2172	0	0
YHR024C	MAS2	mas2-10	0	-0.1515	-0.1206
YBR142W	MAK5	mak5-ph	0.3214	0	0
YDR060W	MAK21	mak21-1	0	-0.1265	0
YAL025C	MAK16	mak16-ph	-0.3254	-0.2765	-0.15
YDR062W	LCB2	lcb2-2	-0.2505	-0.32	-0.3171
YMR296C	LCB1	lcb1-10	0	0	-0.2118
YMR296C	LCB1	lcb1-2	0.1652	0	0
YOR181W	LAS17	las17-1	0.5008	0	0
YOR181W	LAS17	las17-14	-0.1843	0	0
YHR186C	KOG1	kog1-1	0.2278	0	0
YDL108W	KIN28	kin28-ts	0.2651	0	0
YLR347C	KAP95	kap95-l63a	-0.133	0	0
YIL026C	IRR1	irr1-1	0	-0.1585	-0.3268
YPL209C	IPL1	ipl1-1	0	-0.1657	0
YNL075W	IMP4	imp4-2	0	-0.1855	-0.275
YPR033C	HTS1	hts1-1	0	0	0.1798
YGL073W	HSF1	hsf1-848	-0.6134	-0.923	0
YPL204W	HRR25	hrr25-ph	0.4364	0	0
YOL123W	HRP1	hrp1-1	-0.3925	0	0
YOL123W	HRP1	hrp1-4	0	-0.1632	0
YDR454C	GUK1	guk1-ph	0	0	-0.1558
YLR293C	GSP1	gsp1-p162l	0	0	-0.5214
YDR331W	GPI8	ydr331w-ph	-0.3796	0	0
YPL076W	GPI2	gpi2-774	-0.1472	-0.1319	-0.1812
YDR434W	GPI17	gpi17-ph	-0.1302	-0.1324	-0.1373
YDR302W	GPI11	gpi11-ph	0	0	-0.1664
YGL142C	GPI10	gpi10-ph	-0.3262	-0.1676	-0.6499
YGR216C	GPI1	gpi1-1	0.1887	0	0
YFL017C	GNA1	yfl017c-ph	-0.1249	-0.1241	0
YDL207W	GLE1	gle1-4	-0.1567	0	-0.194
YLR459W	GAB1	gab1-1	-0.148	-0.1501	-0.1282
YLR060W	FRS1	ylr060w-ph	0	0	-0.2372
YKL060C	FBA1	ykl060c-ph	-0.1693	-0.4842	-0.1577
YBR102C	EXO84	exo84-102	-0.1866	0	-0.3606
YJL085W	EXO70	exo70-29/37	-0.7106	-0.3908	-0.4554
YJR017C	ESS1	ess1-h164r	0	0.2101	0
YHR007C	ERG11	erg11-td	0.2892	0	0
YPL028W	ERG10	erg10-1	0.1643	0	0
YMR049C	ERB1	erb1-ph	0	-0.12	0
YBR247C	ENP1	enp1-1	0.2348	0	0
YKL172W	EBP2	ebp2-1	0.2031	0	0
YIR010W	DSN1	dsn1-7	-0.1214	0	0
YPR183W	DPM1	dpm1-6	-0.5048	-0.1816	-0.1755
YJL090C	DPB11	dpb11-1	0	0.1815	0
YHR164C	DNA2	dna2-1	0.334	0	0
YOL021C	DIS3	dis3-1	0.2849	0	0
YPL266W	DIM1	dim1-2	0	-0.1639	0
YOR204W	DED1	ded1-f144c	0.46	0	0
YLR276C	DBP9	dbp9-ph	0	0	-0.205
YNR038W	DBP6	dbp6-ph	0	0	-0.313
YDR052C	DBF4	dbf4-1	0	-0.2686	0
YGR092W	DBF2	dbf2-2	-0.1432	-0.1746	0
YGR113W	DAM1	dam1-19	-0.4437	-0.1821	0
YKR083C	DAD2	dad2-9	0.2346	0	0
YDR016C	DAD1	dad1-ph	-0.227	0	0
YMR240C	CUS1	cus1-3	0.2014	0	0
YMR094W	CTF13	ctf13-30	0	0.203	0
YGR218W	CRM1	crm1-1	0	0	-0.8111
YDL145C	COP1	cop1-1	-0.1667	0	0
YER157W	COG3	cog3-1	0.1771	0	0
YGR120C	COG2	cog2-1	0	0	-0.218
YLL050C	COF1	cof1-8	0.1629	0	0
YBR109C	CMD1	cmd1-1	0	0	-0.2258
YBR109C	CMD1	cmd1-3	0.2151	0.3238	0
YBR135W	CKS1	cks1-35	-0.1436	0	0
YBR135W	CKS1	cks1-38	-0.1522	0	0
YHR122W	CIA2	yhr122w-ph	0	0	-0.2223
YLR115W	CFT2	cft2-ph	0.2913	0.2237	0
YGL130W	CEG1	ceg1-3	0	0.1812	0
YJR057W	CDC8	cdc8-1	-0.2683	0	0
YPL160W	CDC60	cdc60-ts	-0.1773	0	0
YDL132W	CDC53	cdc53-1	0	-0.1804	-0.3354
YDL126C	CDC48	cdc48-1	0	0	-0.1346
YDL126C	CDC48	cdc48-4601	0	-0.1594	0
YDR364C	CDC40	cdc40-ts	0.4335	0	0
YCR093W	CDC39	cdc39-1	0	0	-0.2065
YDR168W	CDC37	cdc37-ts	0	0	-0.3013
YDR054C	CDC34	cdc34-1	-0.1762	-0.3124	0
YBR160W	CDC28	cdc28-1	-0.1387	0	0
YBR160W	CDC28	cdc28-4	0	-0.1526	0
YAL041W	CDC24	cdc24-11	-0.1558	0	0
YAL041W	CDC24	cdc24-2	0.2375	0	0
YAL041W	CDC24	cdc24-5	-0.2299	0	0
YHR166C	CDC23	cdc23-4	0	-0.1514	0
YAR019C	CDC15	cdc15-2	-0.1869	0	0
YJR076C	CDC11	cdc11-1	0.1781	0	0
YJR076C	CDC11	cdc11-2	0	-0.1257	0
YJR076C	CDC11	cdc11-3	0	0	-0.1366
YCR002C	CDC10	cdc10-4	-0.1233	0	0
YDR182W	CDC1	cdc1-1	-0.2461	-0.2877	0
YDR182W	CDC1	cdc1-4	0.3015	0	0
YGR277C	CAB4	cab4-ph	0	0.1609	-0.136
YKL088W	CAB3	cab3-ph	0	0.2022	0
YDR531W	CAB1	cab1-ph	0	0	-0.2569
YHR036W	BRL1	brl1-2221	0	0	-0.4986
YHR036W	BRL1	brl1-c371r	0	0	-0.5444
YHR036W	BRL1	brl1-c371s	0	0	-0.502
YHR036W	BRL1	brl1-k405i	0.2302	0.1895	-0.1944
YHR101C	BIG1	big1-ph	0	0.1773	-0.2342
YDR299W	BFR2	bfr2-ph	0	0.2806	0
YPL255W	BBP1	bbp1-1	0.5154	0.6004	0
YKL052C	ASK1	ask1-2	0.2476	0	0
YPR034W	ARP7	arp7-e411k	0.2945	0	0
YOR249C	APC5	apc5-ca	0.2499	0	0
YLR127C	APC2	apc2-8	0.1875	0	0
YDL008W	APC11	apc11-13	0.3033	0	0
YOL130W	ALR1	yol130w-ph	0.1809	-0.1351	0
YGL065C	ALG2	alg2-1	0	-0.1202	0
YFL039C	ACT1	act1-101	-0.1493	0	0
YFL039C	ACT1	act1-105	-0.2328	-0.1916	0
YFL039C	ACT1	act1-108	-0.286	0	0
YFL039C	ACT1	act1-112	-0.1407	0	0
YFL039C	ACT1	act1-120	-0.1204	0	0
YFL039C	ACT1	act1-121	-0.2906	0	0
YFL039C	ACT1	act1-122	-0.1372	0	0
YFL039C	ACT1	act1-124	-0.1537	0	0
YFL039C	ACT1	act1-125	-0.2697	0	0
YFL039C	ACT1	act1-132	-0.209	0	0
YFL039C	ACT1	act1-136	-0.189	0	0
YFL039C	ACT1	act1-2	0	-0.2875	-0.2892
YFL039C	ACT1	act1-3	-0.2841	0	-0.2301
YKL112W	ABF1	abf1-102	0.2073	0	0
YBL074C	AAR2	aar2-ph	0	-0.3195	-0.2128

## Sheet: Cluster_Gene_list
# of genes	20	31	130	27	25	115	66	13	27	26	137	6	38	5	29
Cluster #	Cluster 1	Cluster 2	Cluster 3	Cluster 4	Cluster 5	Cluster 6	Cluster 7	Cluster 8	Cluster 9	Cluster 10	Cluster 11	Cluster 12	Cluster 13	Cluster 14	Cluster 15
	DPM1	ACT1	ACA1	AAR2	ACT1	ACT1	AGA1	AIM11	ADH5	AIM4	ABF1	ARG1	ACF2	LSC1	ARG82
	EXO70	EXO84	ADE1	ACT1	CDC1	ADE6	ALG2	ARO1	AIR2	ATP10	AIM14	ICE2	ARF1	PHB2	BFR2
	GAB1	GLE1	APM1	BUD13	CDC2	AGP1	BRR1	ARO7	ARG5	BBP1	AIM22	SGV1	ARP6	SAC3	CAB3
	GPI17	GPI10	ARO8	BUD21	CDC34	ALG5	CAT8	CHO2	CMC1	BRL1	ALT1	SLG1	CLU1	YPR162C	CEG1
	GPI2	HDA3	BDH2	CDC53	DAM1	ATG8	CBC2	EST1	CSE2	CDC47	APC11	TIM44	DBR1	YTA7	CTF13
	LCB2	HHF1	BEM4	IMP4	DBF2	BAS1	CDC11	FLX1	DST1	CFT2	APC2	YOL130W	DUS3		CTK1
	MAK16	MCH5	BIG1	INP1	HSF1	BEM1	CDC23	OPI3	EMI1	CMD1	APC5		FAR1		DPB11
	NSE4	MNN2	BMH2	IRR1	LTE1	BLI1	CDC28	PDE2	GSH1	EGD1	ARG2		FSH2		EAF1
	PRP43	MOB2	BRE5	MAS2	MMR1	BUD31	CDC48	PHB1	IXR1	MCM10	ARG3		GDH3		ESS1
	RPF2	MPS1	BRL1	NKP2	NOP12	CDC10	DBF4	RPL43A	LEU1	MED6	ARP7		HRQ1		FMT1
	RPL19A	NSE4	CAB1	NUP57	PTC6	CDC15	DDI1	SPO16	LYS12	ORC1	ASK1		HTS1		GSF2
	SIR1	NSE5	CAB4	PAM16	RPL6B	CDC24	DIM1	SXM1	LYS2	ORC2	ATP18		HUA1		MCM2
	SIZ1	NUP188	CAT2	PRE4	SAC7	CDC28	DOG2	UME6	LYS4	ROM2	ATP23		KAR3		MED6
	SKI7	PAN1	CDA2	PRE6	SGT1	CDC60	ECM29		MED1	RPL22A	BCS1		LEU4		MOB2
	TFB1	RPL20B	CDC11	PUP1	SHE4	CDC8	ERB1		MED8	RSC2	CDC1		LRP1		NSE3
	TPS1	RPN11	CDC37	PUP3	SLT2	CIK1	ETR1		MMS22	SED5	CDC11		MDH2		ORC2
	TPS2	RPS1B	CDC39	ROX3	SNU66	CKS1	HRP1		MRPL1	SFT1	CDC24		MFT1		ORC6
	VPS8	RSP5	CDC46	RPN1	SRN2	COP1	HSV2		MSS18	SKI6	CDC40		NPR3		RPC40
	YJL119C	SAS2	CDC48	RPT6	TAP42	CSF1	IPL1		SOH1	SLD3	COF1		NSE1		SDA1
	YPL261C	SLY41	CMD1	TAF5	THR1	DAD1	LAS21		SPT3	SPC42	COG3		RPS25B		SLI15
		SRV2	CMS1	THI3	VPS21	DCC1	LIA1		STE50	TFA2	CRP1		RTF1		SRP101
		STT3	COG2	VAM6	VPS24	DID2	LIP5		TEF2	UBP8	CSG2		SGF73		STU2
		THI21	CRM1	VAM7	YFL017C	DSD1	LPD1		TKL1	VRP1	CUS1		SMC2		TIM22
		TOS4	CSM3	YDJ1	YIL106W	DSN1	MAK21		YGL024W	YBR137W	DAD2		SNF1		UBP3
		UBC4	CST9	YDL148C	YKL060C	EDE1	MET22		YJL175W	YGL218W	DAL81		SPC42		YHR035W
		YDR042C	DBP6	YOR082C		ELM1	MOB2		YME1	YKL023W	DBP7		SPE1		YJL072C
		YDR048C	DBP9	YOR362C		EMP70	MOT1		YPR044C		DED1		SRP102		YJU2
		YGL149W	DFG16			FRE8	MTC4				DIS3		STT4		YMR031W
		YJL011C	DLT1			FSH3	MTC5				DNA2		STU1		YPL205C
		YNR005C	DUS4			FUS3	MUD2				EAF3		SWC3
		YPR092W	ERV14			GRX6	MVD1				EBP2		THP3
			FEN1			GUP1	NOP4				ENP1		VPS4
			FLC1			HFA1	NPA3				ERG10		YLR036C
			FPS1			HRP1	PIH1				ERG11		YLR118C
			FRE1			HUR1	PRE2				ERG3		YLR169W
			FUS2			HUT1	PXL1				GPI1		YLR179C
			GPI11			ICT1	RDS3				GRR1		YLR311C
			GPM3			IES4	RET3				HAP3		YLR312C
			GPR1			IME2	RNT1				HIS1
			GRE2			IMP2'	RPL21B				HIS2
			GSP1			KAP95	RPL35A				HIS4
			GUK1			KIN3	RPL8A				HIS5
			IRC25			LAS17	RPN12				HIS7
			ISW1			LRG1	RPN4				HRR25
			LCB1			MAC1	RTG1				HSP42
			LEA1			MCA1	SCW4				IES5
			MOB2			MEI4	SEC53				IMG2
			MON1			MUD1	SGV1				INO2
			MUM3			MVB12	SIN3				IRA2
			NDE1			MYO2	SPN1				ISU1
			NMT1			NAP1	SPO14				KIN28
			NSE3			NNF1	SPT6				KOG1
			NSE4			NOP1	SRO9				LAS17
			NSE5			NOP2	TAF4				LCB1
			NTG2			NOP56	TAT2				LYS1
			NUP133			NSE5	TIM50				LYS5
			NUP159			OCA5	TOP1				MAK5
			NUP170			OPT2	VAM3				MCD4
			OLE1			PAC10	VIP1				MED11
			PDC5			PAT1	VPS29				MED4
			PET10			PBN1	VPS5				MES1
			PML39			PHO2	VPS51				MGE1
			PPZ1			PHS1	YAL004W				MGR1
			PSO2			PKR1	YGL007W				MGR2
			RHO1			PMR1	YKR035C				MKS1
			RIM13			POL1	YML010C				MLS1
			RMP1			POL31					MSN4
			RNA1			PPR1					MTO1
			ROT1			PRE7					MTR4
			RPF1			PRP31					NCS6
			RPL17B			PSK1					NOP2
			RPL23A			PTP2					OST2
			RPL31B			RHO3					PCF11
			RPN5			RNA15					PHO80
			RPN7			RPC34					PKC1
			RPS28B			RPL8B					POB3
			RPS7B			RPO41					POP4
			RPT1			RRM3					PRP16
			RPT4			RTC2					PTH1
			RRP1			SEC15					PTK2
			RSA3			SEC23					RAD3
			RSF1			SEC26					RCY1
			RSP5			SLA1					RGL1
			RTT102			SNT1					RGR1
			SEC18			SPC24					RPB2
			SEC27			SRL2					RPO21
			SEF1			STT3					RPS21B
			SLX9			SWC4					RPS29B
			SMP3			TCP1					RRN10
			SPC110			TPI1					RRP45
			SPC98			UBC5					RRP6
			SRF1			UBX7					RXT2
			SST2			URA6					SCS7
			STI1			UTP23					SDS3
			SUR4			VBA3					SEC1
			TAD3			VPS1					SEC12
			TBF1			VPS13					SEC22
			TOP3			VPS27					SEC24
			TRM82			YBL083C					SEC28
			TRP2			YBR220C					SEC62
			TSC13			YBR224W					SEN1
			TUB4			YDL062W					SKN1
			ULS1			YDL180W					SLX5
			UPS1			YDR157W					SMC4
			USA1			YDR331W					SMF3
			UTP9			YDR416W					SNF6
			VAC7			YDR525W					SPC34
			VPH1			YHR045W					SPT15
			YAL043C			YHR127W					SRB8
			YCL004W			YJR042W					SSL1
			YCL062W			YLR029C					STE24
			YDL096C			YNL046W					STP1
			YDR449C			YOL102C					STU1
			YDR541C			YOR366W					SUB1
			YER135C			YPR016C					SUP35
			YHR122W								SUR1
			YKE2								SWD2
			YKL069W								SYT1
			YKR022C								TFB1
			YLR031W								TFB3
			YLR060W								TIM23
			YLR111W								TSC11
			YLR236C								TUS1
			YLR338W								URA2
			YMR093W								VID22
			YOR139C								VTI1
			YOR309C								YBR238C
			YOS9								YBT1
			YPL080C								YCR061W
			YRB1								YDR081C
											YGL235W
											YIL061C
											YJR087W
											YKL053W
											YKT6
											YLR294C
											YPR086W

## Sheet: Cluster_Mutant_list
# of mutants	20	33	135	27	25	126	66	13	27	26	138	6	38	5	30
Cluster #	Cluster 1	Cluster 2	Cluster 3	Cluster 4	Cluster 5	Cluster 6	Cluster 7	Cluster 8	Cluster 9	Cluster 10	Cluster 11	Cluster 12	Cluster 13	Cluster 14	Cluster 15
	dpm1-6	act1-3	aca1	aar2-ph	act1-105	act1-101	aga1	aim11	adh5	aim4	abf1-102	arg1	acf2	lsc1	arg82
	exo70-29/37	exo84-102	ade1	act1-2	cdc1-1	act1-108	alg2-1	aro1	air2	atp10	aim14	ice2	arf1	phb2	bfr2-ph
	gab1-1	gle1-4	apm1	bud13	cdc2-7	act1-112	brr1	aro7	arg5	bbp1-1	aim22	sgv1-80	arp6	sac3	cab3-ph
	gpi17-ph	gpi10-ph	aro8	bud21	cdc34-1	act1-120	cat8	cho2	cmc1	brl1-k405i	alt1	slg1	clu1	ypr162c-ph	ceg1-3
	gpi2-774	hda3	bdh2	cdc53-1	dam1-19	act1-121	cbc2	est1	cse2	cdc47-ts	apc11-13	tim44-8	dbr1	yta7	ctf13-30
	lcb2-2	hhf1	bem4	imp4-2	dbf2-2	act1-122	cdc11-2	flx1	dst1	cft2-ph	apc2-8	yol130w-ph	dus3		ctk1
	mak16-ph	mch5	big1-ph	inp1	hsf1-848	act1-124	cdc23-4	opi3	emi1	cmd1-3	apc5-ca		far1		dpb11-1
	nse4-ts2	mnn2	bmh2	irr1-1	lte1	act1-125	cdc28-4	pde2	gsh1	egd1	arg2		fsh2		eaf1
	prp43-ts2	mob2-22	bre5	mas2-10	mmr1	act1-132	cdc48-4601	phb1	ixr1	mcm10-1	arg3		gdh3		ess1-h164r
	rpf2-ph	mob2-38	brl1-2221	nkp2	nop12	act1-136	dbf4-1	rpl43a	leu1	med6-ph	arp7-e411k		hrq1		fmt1
	rpl19a	mps1-3796	brl1-c371r	nup57-e17	ptc6	ade6	ddi1	spo16	lys12	orc1-ph	ask1-2		hts1-1		gsf2
	sir1	nse4-ph	brl1-c371s	pam16-3	rpl6b	agp1	dim1-2	sxm1	lys2	orc2-2	atp18		hua1		mcm2-1
	siz1	nse5-ts3	cab1-ph	pre4-ph	sac7	alg5	dog2	ume6	lys4	rom2	atp23		kar3		med6-ts
	ski7	nup188	cab4-ph	pre6-ph	sgt1-5	atg8	ecm29		med1	rpl22a	bcs1		leu4		mob2-20
	tfb1-6	pan1-4	cat2	pup1-1	she4	bas1	erb1-ph		med8-39	rsc2	cdc1-4		lrp1		nse3-ph
	tps1	rpl20b	cda2	pup3-ph	slt2	bem1	etr1		mms22	sed5-1	cdc11-1		mdh2		orc2-1
	tps2	rpn11-14	cdc11-3	rox3-182	snu66	bli1	hrp1-4		mrpl1	sft1-15	cdc24-2		mft1		orc2-4
	vps8	rps1b	cdc37-ts	rpn1-821	srn2	bud31	hsv2		mss18	ski6-ph	cdc40-ts		npr3		orc6-ph
	yjl119c	rsp5-1	cdc39-1	rpt6-1	tap42-11	cdc10-4	ipl1-1		soh1	sld3-ph	cof1-8		nse1-16		rpc40-v78r
	ypl261c	sas2	cdc46-1	taf5-20	thr1	cdc15-2	las21		spt3	spc42-10	cog3-1		rps25b		sda1-2
		sly41	cdc48-1	thi3	vps21	cdc24-11	lia1		ste50	tfa2-45	crp1		rtf1		sli15-3
		srv2-2	cmd1-1	vam6	vps24	cdc24-5	lip5		tef2	ubp8	csg2		sgf73		srp101-47
		stt3-1	cms1	vam7	yfl017c-ph	cdc28-1	lpd1		tkl1	vrp1	cus1-3		smc2-8		stu2-10
		stt3-7	cog2-1	ydj1	yil106w-ph	cdc60-ts	mak21-1		ygl024w	ybr137w	dad2-9		snf1		tim22-19
		thi21	crm1-1	ydl148c-ph	ykl060c-ph	cdc8-1	met22		yjl175w	ygl218w	dal81		spc42-11		ubp3
		tos4	csm3	yor082c		cik1	mob2-28		yme1	ykl023w	dbp7		spe1		yhr035w
		ubc4	cst9	yor362c-ph		cks1-35	mot1-1033		ypr044c		ded1-f144c		srp102-510		yjl072c-ph
		ydr042c	dbp6-ph			cks1-38	mtc4				dis3-1		stt4-4		yju2-ph
		ydr048c	dbp9-ph			cop1-1	mtc5				dna2-1		stu1-5		ymr031w-a
		ygl149w	dfg16			csf1	mud2				eaf3		swc3		ypl205c
		yjl011c-ph	dlt1			dad1-ph	mvd1-1296				ebp2-1		thp3
		ynr005c	dus4			dcc1	nop4-3				enp1-1		vps4
		ypr092w	erv14			did2	npa3-ph				erg10-1		ylr036c
			fen1			dsd1	pih1				erg11-td		ylr118c
			flc1			dsn1-7	pre2-v214a				erg3		ylr169w
			fps1			ede1	pxl1				gpi1-1		ylr179c
			fre1			elm1	rds3-1				grr1		ylr311c
			fus2			emp70	ret3-1				hap3		ylr312c
			gpi11-ph			fre8	rnt1-47				his1
			gpm3			fsh3	rpl21b				his2
			gpr1			fus3	rpl35a				his4
			gre2			grx6	rpl8a				his5
			gsp1-p162l			gup1	rpn12-1				his7
			guk1-ph			hfa1	rpn4				hrr25-ph
			irc25			hrp1-1	rtg1				hsp42
			isw1			hur1	scw4				ies5
			lcb1-10			hut1	sec53-6				img2
			lea1			ict1	sgv1-35				ino2
			mob2-19			ies4	sin3				ira2
			mob2-26			ime2	spn1-k192n				isu1
			mon1			imp2'	spo14				kin28-ts
			mum3			kap95-l63a	spt6-14				kog1-1
			nde1			kin3	sro9				las17-1
			nmt1-181			las17-14	taf4-18				lcb1-2
			nse3-ts3			lrg1	tat2				lys1
			nse4-ts4			mac1	tim50-ph				lys5
			nse5-ts4			mca1	top1				mak5-ph
			ntg2			mei4	vam3				mcd4-174
			nup133			mud1	vip1				med11-ts
			nup159-1			mvb12	vps29				med4-54
			nup170			myo2-14	vps5				med4-6
			ole1-m2			nap1	vps51				mes1-1
			pdc5			nnf1-77	yal004w				mge1-100
			pet10			nop1-3	ygl007w				mgr1
			pml39			nop2-3	ykr035c				mgr2
			ppz1			nop56-ph	yml010c-b				mks1
			pso2			nse5-ts2					mls1
			rho1-td			oca5					msn4
			rim13			opt2					mto1
			rmp1-ts			pac10					mtr4-1
			rna1-1			pat1					ncs6
			rna1-s116f			pbn1-ph					nop2-9
			rot1-ph			pho2					ost2-ph
			rpf1-1			phs1-ph					pcf11-ts9
			rpl17b			pkr1					pho80
			rpl23a			pmr1					pkc1-2
			rpl31b			pol1-12					pob3-q308k
			rpn5-1			pol31-ph					pop4-ph
			rpn5-ph			ppr1					prp16-ts
			rpn7-3			pre7-ph					pth1
			rps28b			prp31-ts					ptk2
			rps7b			psk1					rad3-ts14
			rpt1-1			ptp2					rcy1
			rpt4-145			rho3-ser228					rgl1
			rrp1-1			rna15-58					rgr1-100
			rsa3			rpc34-1					rpb2-6
			rsf1			rpl8b					rpo21-1
			rsp5-sm1			rpo41					rps21b
			rtt102			rrm3					rps29b
			sec18-1			rtc2					rrn10
			sec27-1			sec15-1					rrp45-ph
			sef1			sec23-1					rrp6
			slx9			sec26-f856aw860a					rxt2
			smp3-1			sla1					scs7
			spc110-220			snt1					sds3
			spc98-ph			spc24-9					sec1-1
			srf1			srl2					sec12-1
			sst2			stt3-2					sec22
			sti1			swc4-4					sec24-20
			sur4			tcp1-2					sec28
			tad3-ph			tpi1-1670					sec62-ts
			tbf1-ph			ubc5					sen1-1
			top3			ubx7					skn1
			trm82			ura6-5					slx5
			trp2			utp23-ph					smc4-1
			tsc13-ph			vba3					smf3
			tub4-y445d			vps1					snf6
			uls1			vps13					spc34-5
			ups1			vps27					spt15-i143n
			usa1			ybl083c					srb8
			utp9-ph			ybr220c					ssl1-t242i
			vac7			ybr224w					ste24
			vph1			ydl062w					stp1
			yal043c-a			ydl180w					stu1-8
			ycl004w-ph			ydr157w					sub1
			ycl062w			ydr331w-ph					sup35-td
			ydl096c			ydr416w-ph					sur1
			ydr449c-ph			ydr525w					swd2-1
			ydr541c			yhr045w					syt1
			yer135c			yhr127w					tfb1-1
			yhr122w-ph			yjr042w-ph					tfb3-ts
			yke2			ylr029c-ph					tim23-ph
			ykl069w			ynl046w					tsc11-1
			ykr022c-ph			yol102c-ph					tus1
			ylr031w			yor366w					ura2
			ylr060w-ph			ypr016c-ph					vid22
			ylr111w								vti1-11
			ylr236c								ybr238c
			ylr338w								ybt1
			ymr093w-ph								ycr061w
			yor139c								ydr081c-ph
			yor309c								ygl235w
			yos9								yil061c-ph
			ypl080c								yjr087w
			yrb1-51								ykl053w
											ykt6-ph
											ylr294c
											ypr086w-ph
