# Supplementary material for: Genetic profiling of protein burden and nuclear export overload
Source: eLife journal article supplement (doi:10.7554/elife.54080), 2020-11-04
Supplement: supp [file elife-54080-supp-v1.zip › elife_poa_e54080_Figure_6_source_data_1.xlsx]

## Sheet: Protein_analysis
Orf_name	Protein_name	Vector_1	Vector_2	Vector_3	Vector_average	Vector_SD	tGFP-op_1	tGFP-op_2	tGFP-op_3	tGFP-op_average	tGFP-op_SD	log2_tGFP-op/Vector
Ybr118w/Ypr080w	Tef2/Tef1	160	167	178	168.333	9.07377	134	136	139	136.333	2.51661	-0.304183
Yal005c/Yll024c	Ssa1/Ssa2	20	20	23	21	1.73205	124	145	138	135.667	10.6927	2.69161
Yhr174w	Eno2	23	18	17	19.3333	3.21455	88	83	89	86.6667	3.21455	2.16439
Ykl060c	Fba1	21	23	28	24	3.60555	72	88	80	80	8	1.73697
tGFP	tGFP	0	0	0	0	0	64	71	74	69.6667	5.1316
Yal038w	Cdc19	52	54	63	56.3333	5.85947	59	64	64	62.3333	2.88675	0.146015
Ydr385w/Yor133w	Eft2/Eft1	62	51	58	57	5.56776	55	66	64	61.6667	5.85947	0.113529
Ycr012w	Pgk1	29	31	38	32.6667	4.72582	61	62	59	60.6667	1.52753	0.893085
Ygr254w/Yhr174w	Eno1/Eno2	31	38	34	34.3333	3.51188	59	59	61	59.6667	1.1547	0.797315
Ygr192c	Tdh3	22	28	31	27	4.58258	53	55	56	54.6667	1.52753	1.0177
Ykl182w	Fas1	37	39	41	39	2	48	57	58	54.3333	5.50757	0.478363
Ynr016c	Acc1	65	67	73	68.3333	4.16333	43	55	50	49.3333	6.02771	-0.470027
Ypl106c	Sse1	16	20	21	19	2.64575	47	48	50	48.3333	1.52753	1.34702
Ylr044c	Pdc1	25	29	30	28	2.64575	38	41	37	38.6667	2.08167	0.465664
Ypl231w	Fas2	20	31	43	31.3333	11.5036	36	37	41	38	2.64575	0.278301
Yll026w	Hsp104	36	39	38	37.6667	1.52753	29	37	33	33	4	-0.190822
Ylr249w	Yef3	52	44	47	47.6667	4.04145	25	37	35	32.3333	6.4291	-0.559958
Ymr186w/Ypl240c	Hsc82/Hsp82	25	25	27	25.6667	1.1547	28	37	30	31.6667	4.72582	0.303069
Yjl130c	Ura2	31	34	40	35	4.58258	23	33	34	30	6.08276	-0.222392
Ylr109w	Ahp1	9	8	9	8.66667	0.57735	34	28	25	29	4.58258	1.7425
Ylr355c	Ilv5	16	15	19	16.6667	2.08167	24	32	31	29	4.3589	0.799087
Ydl185w	Vma1	23	24	26	24.3333	1.52753	26	27	26	26.3333	0.57735	0.113956
Ydl229w/Ynl209w	Ssb1/Ssb2	27	30	27	28	1.73205	24	25	27	25.3333	1.52753	-0.14439
Ycl030c	His4	26	27	26	26.3333	0.57735	24	26	20	23.3333	3.05505	-0.174498
Yfl039c	Act1	18	19	20	19	1	24	24	21	23	1.73205	0.275634
Yor369c	Rps12	8	5	10	7.66667	2.51661	22	24	20	22	2	1.52083
Ydr050c	Tpi1	13	12	13	12.6667	0.57735	22	20	24	22	2	0.796467
Ydl126c	Cdc48	31	33	38	34	3.60555	22	22	19	21	1.73205	-0.695145
Ylr058c	Shm2	22	20	25	22.3333	2.51661	18	24	20	20.6667	3.05505	-0.111893
Ygl009c	Leu1	11	13	11	11.6667	1.1547	22	21	19	20.6667	1.52753	0.824913
Ybr127c	Vma2	21	18	21	20	1.73205	15	25	21	20.3333	5.03322	0.0238467
Ykl210w	Uba1	8	9	9	8.66667	0.57735	18	23	18	19.6667	2.88675	1.1822
Ynl178w	Rps3	11	13	12	12	1	17	19	22	19.3333	2.51661	0.688056
Yfr053c	Hxk1	10	11	9	10	1	19	18	21	19.3333	1.52753	0.95109
Ygl026c	Trp5	20	22	26	22.6667	3.05505	19	21	18	19.3333	1.52753	-0.229482
Yjr121w	Atp2	19	14	18	17	2.64575	19	19	20	19.3333	0.57735	0.185556
Yer091c	Met6	24	25	26	25	1	21	19	17	19	2	-0.395929
Yjr109c	Cpa2	10	12	13	11.6667	1.52753	19	18	20	19	1	0.703607
Ygl206c	Chc1	26	28	23	25.6667	2.51661	20	15	21	18.6667	3.21455	-0.459432
Ygr240c	Pfk1	13	10	14	12.3333	2.08167	21	18	15	18	3	0.545434
Ymr120c	Ade17	18	20	23	20.3333	2.51661	19	16	19	18	1.73205	-0.17585
Yal005c	Ssa1	10	11	13	11.3333	1.52753	18	18	18	18	0	0.667425
Yor335c	Ala1	1	4	4	3	1.73205	13	18	21	17.3333	4.04145	2.53051
Ygl245w	Gus1	17	21	16	18	2.64575	15	20	17	17.3333	2.51661	-0.0544478
Ymr108w	Ilv2	13	16	15	14.6667	1.52753	19	16	17	17.3333	1.52753	0.241008
Yll018c	Dps1	7	6	8	7	1	18	16	17	17	1	1.28011
Ynl064c	Ydj1	11	11	14	12	1.73205	17	17	17	17	0	0.5025
Yjl138c/Ykr059w	Tif2/Tif1	16	21	24	20.3333	4.04145	17	17	17	17	0	-0.258312
Ydr258c	Hsp78	15	11	12	12.6667	2.08167	14	17	19	16.6667	2.51661	0.395929
Ylr153c	Acs2	14	15	17	15.3333	1.52753	15	15	19	16.3333	2.3094	0.0911479
Ygl008c/Ypl036w	Pma1/Pma2	20	18	22	20	2	15	17	17	16.3333	1.1547	-0.292181
Ygl253w	Hxk2	11	9	14	11.3333	2.51661	14	17	16	15.6667	1.52753	0.467126
Ypl061w	Ald6	9	9	11	9.66667	1.1547	13	13	20	15.3333	4.04145	0.665581
Ydr127w	Aro1	12	13	13	12.6667	0.57735	14	15	17	15.3333	1.52753	0.275634
Yor374w	Ald4	17	16	16	16.3333	0.57735	16	16	14	15.3333	1.1547	-0.0911479
Ybl099w	Atp1	13	10	17	13.3333	3.51188	17	17	11	15	3.4641	0.169925
Ygr155w	Cys4	14	21	23	19.3333	4.72582	15	15	15	15	0	-0.366128
Ykl104c	Gfa1	13	15	14	14	1	12	16	16	14.6667	2.3094	0.0671142
Ybl076c	Ils1	3	2	6	3.66667	2.08167	13	16	15	14.6667	1.52753	2
Ylr259c	Hsp60	10	7	14	10.3333	3.51188	13	16	15	14.6667	1.52753	0.505235
Yer043c	Sah1	18	18	20	18.6667	1.1547	14	16	14	14.6667	1.1547	-0.347923
Ypl160w	Cdc60	5	8	4	5.66667	2.08167	14	15	15	14.6667	0.57735	1.37197
Yor027w	Sti1	10	13	15	12.6667	2.51661	12	14	17	14.3333	2.51661	0.178337
Yor063w	Rpl3	15	13	12	13.3333	1.52753	16	14	13	14.3333	1.52753	0.104337
Ygr192c/Yjl052w/Yjr009c	Tdh3/Tdh1/Tdh2	11	9	7	9	2	15	15	13	14.3333	1.1547	0.671377
Ymr186w	Hsc82	13	12	11	12	1	13	15	15	14.3333	1.1547	0.25634
Ygr094w	Vas1	11	16	16	14.3333	2.88675	10	15	17	14	3.60555	-0.0339473
Ybr031w/Ydr012w	Rpl4a/Rpl4b	15	14	14	14.3333	0.57735	14	10	17	13.6667	3.51188	-0.0687128
Yjl034w	Kar2	12	12	11	11.6667	0.57735	14	16	11	13.6667	2.51661	0.228269
Ygr061c	Ade6	1	1	4	2	1.73205	12	14	14	13.3333	1.1547	2.73697
Ybr121c	Grs1	4	6	4	4.66667	1.1547	13	10	16	13	3	1.47805
Yhr019c	Ded81	4	8	5	5.66667	2.08167	12	16	11	13	2.64575	1.19794
Yhr020w	Yhr020w	6	8	6	6.66667	1.1547	12	13	14	13	1	0.963474
Ycl043c	Pdi1	12	10	12	11.3333	1.1547	13	14	12	13	1	0.197939
Ydr037w	Krs1	8	7	7	7.33333	0.57735	9	14	15	12.6667	3.21455	0.788496
Ybr025c	Ola1	16	13	15	14.6667	1.52753	10	13	15	12.6667	2.51661	-0.211504
Yer110c	Kap123	10	8	13	10.3333	2.51661	13	15	9	12.3333	3.05505	0.255257
Ycl040w	Glk1	5	3	6	4.66667	1.52753	11	13	13	12.3333	1.1547	1.4021
Yjr016c	Ilv3	12	12	9	11	1.73205	12	12	13	12.3333	0.57735	0.165059
Yer165w	Pab1	10	16	16	14	3.4641	9	12	15	12	3	-0.222392
Ynl055c	Por1	11	11	12	11.3333	0.57735	10	13	13	12	1.73205	0.0824622
Ydl022w	Gpd1	5	6	7	6	1	13	11	12	12	1	1
Ymr205c	Pfk2	6	6	7	6.33333	0.57735	11	13	12	12	1	0.921997
Yjl080c	Scp160	13	16	14	14.3333	1.52753	10	10	15	11.6667	2.88675	-0.296982
Yil078w	Ths1	5	7	6	6	1	9	14	12	11.6667	2.51661	0.959358
Yor198c	Bfr1	10	12	11	11	1	9	13	13	11.6667	2.3094	0.0848889
Yhr018c	Arg4	8	5	8	7	1.73205	10	13	12	11.6667	1.52753	0.736966
Ydr341c	Ydr341c	5	5	4	4.66667	0.57735	13	11	11	11.6667	1.1547	1.32193
Yml028w	Tsa1	6	6	6	6	0	11	12	12	11.6667	0.57735	0.959358
Ylr303w	Met17	6	6	8	6.66667	1.1547	9	14	11	11.3333	2.51661	0.765535
Ydr502c/Ylr180w	Sam2/Sam1	7	6	9	7.33333	1.52753	10	14	10	11.3333	2.3094	0.628031
Yhl033c/Yll045c	Rpl8a/Rpl8b	9	10	10	9.66667	0.57735	9	12	13	11.3333	2.08167	0.229482
Ypr181c	Sec23	11	13	11	11.6667	1.1547	10	13	11	11.3333	1.52753	-0.0418202
Ydl131w/Ydl182w	Lys21/Lys20	9	8	14	10.3333	3.21455	12	10	12	11.3333	1.1547	0.133267
Ypr074c	Tkl1	4	10	8	7.33333	3.05505	12	11	11	11.3333	0.57735	0.628031
Yel071w	Dld3	9	7	8	8	1	11	12	11	11.3333	0.57735	0.5025
Yhr203c/Yjr145c	Rps4b/Rps4a	7	15	11	11	4	12	11	11	11.3333	0.57735	0.0430687
Yjr045c	Ssc1	11	10	9	10	1	8	9	16	11	4.3589	0.137504
Ykl157w	Ape2	4	3	1	2.66667	1.52753	10	9	14	11	2.64575	2.04439
Yll024c	Ssa2	4	7	7	6	1.73205	10	12	11	11	1	0.874469
Ypl240c	Hsp82	4	6	8	6	2	10	12	11	11	1	0.874469
Ymr116c	Asc1	10	10	9	9.66667	0.57735	11	11	11	11	0	0.186413
Ybr196c	Pgi1	13	14	14	13.6667	0.57735	7	12	13	10.6667	3.21455	-0.357552
Ydl124w	Ydl124w	2	1	5	2.66667	2.08167	10	14	8	10.6667	3.05505	2
Yil041w	Gvp36	8	11	11	10	1.73205	8	11	13	10.6667	2.51661	0.0931094
Yfl018c	Lpd1	5	4	2	3.66667	1.52753	8	12	12	10.6667	2.3094	1.54057
Ylr354c	Tal1	6	7	4	5.66667	1.52753	13	9	10	10.6667	2.08167	0.912537
Ydr099w/Yer177w	Bmh2/Bmh1	13	11	12	12	1	10	9	13	10.6667	2.08167	-0.169925
Ygl234w	Ade5,7	4	7	4	5	1.73205	9	11	12	10.6667	1.52753	1.09311
Ynl134c	Ynl134c	7	7	11	8.33333	2.3094	9	12	11	10.6667	1.52753	0.356144
Ykl152c	Gpm1	13	11	13	12.3333	1.1547	11	9	12	10.6667	1.52753	-0.209453
Ygr204w	Ade3	7	6	4	5.66667	1.52753	13	10	8	10.3333	2.51661	0.866733
Ykl035w	Ugp1	13	11	15	13	2	9	12	10	10.3333	1.52753	-0.331206
Yfr031c-a/Yil018w	Rpl2a/Rpl2b	11	11	14	12	1.73205	10	10	11	10.3333	0.57735	-0.215729
Ygl135w/Ypl220w	Rpl1b/Rpl1a	6	6	8	6.66667	1.1547	8	13	9	10	2.64575	0.584963
Yer103w	Ssa4	1	2	2	1.66667	0.57735	9	9	12	10	1.73205	2.58496
Ynl220w	Ade12	7	7	6	6.66667	0.57735	8	11	11	10	1.73205	0.584963
Yhr208w	Bat1	6	6	6	6	0	11	9	10	10	1	0.736966
Yor317w	Faa1	14	10	10	11.3333	2.3094	11	9	10	10	1	-0.180572
Yal005c/Ybl075c/Yer103w/Yll024c	Ssa1/Ssa3/Ssa4/Ssa2	9	7	6	7.33333	1.52753	8	8	13	9.66667	2.88675	0.398549
Ybl030c	Pet9	8	5	5	6	1.73205	10	7	12	9.66667	2.51661	0.688056
Ykr001c	Vps1	8	7	10	8.33333	1.52753	7	10	12	9.66667	2.51661	0.214125
Yer178w	Pda1	7	5	8	6.66667	1.52753	8	9	12	9.66667	2.08167	0.536053
Ygl076c/Ypl198w	Rpl7a/Rpl7b	8	9	8	8.33333	0.57735	10	8	11	9.66667	1.52753	0.214125
Ylr075w	Rpl10	10	9	10	9.66667	0.57735	8	11	10	9.66667	1.52753	0
Yor375c	Gdh1	8	10	9	9	1	10	10	9	9.66667	0.57735	0.103093
Yor204w	Ded1	10	9	8	9	1	5	11	12	9.33333	3.78594	0.0524674
Ybr072w	Hsp26	20	14	13	15.6667	3.78594	8	11	9	9.33333	1.52753	-0.747234
Ybr149w	Ara1	0	0	1	0.333333	0.57735	8	10	10	9.33333	1.1547	4.80735
Yhr183w	Gnd1	6	8	13	9	3.60555	10	8	10	9.33333	1.1547	0.0524674
Yor230w	Wtm1	2	4	3	3	1	9	10	9	9.33333	0.57735	1.63743
Yel034w	Hyp2	4	5	6	5	1	9	10	9	9.33333	0.57735	0.900464
Ynl007c	Sis1	4	7	5	5.33333	1.52753	10	9	9	9.33333	0.57735	0.807355
Ygr180c	Rnr4	8	8	7	7.66667	0.57735	9	9	10	9.33333	0.57735	0.283793
Ydl055c	Psa1	12	12	7	10.3333	2.88675	9	10	9	9.33333	0.57735	-0.146841
Yer090w	Trp2	11	10	15	12	2.64575	9	9	10	9.33333	0.57735	-0.36257
Yer069w	Arg5,6	4	4	4	4	0	6	8	13	9	3.60555	1.16993
Ycr053w	Thr4	5	7	8	6.66667	1.52753	7	12	8	9	2.64575	0.432959
Ypl131w	Rpl5	5	7	7	6.33333	1.1547	7	11	9	9	2	0.50696
Ydr023w	Ses1	5	7	4	5.33333	1.52753	8	10	9	9	1	0.754888
Yjl026w	Rnr2	6	5	6	5.66667	0.57735	8	9	10	9	1	0.667425
Ydr418w/Yel054c	Rpl12b/Rpl12a	6	6	8	6.66667	1.1547	8	9	10	9	1	0.432959
Ypl154c	Pep4	12	13	10	11.6667	1.52753	9	10	8	9	1	-0.374396
Yil109c	Sec24	5	11	10	8.66667	3.21455	5	11	10	8.66667	3.21455	0
Ycl050c	Apa1	4	4	3	3.66667	0.57735	8	7	11	8.66667	2.08167	1.24101
Ygr192c/Yjr009c	Tdh3/Tdh2	11	11	14	12	1.73205	7	11	8	8.66667	2.08167	-0.469485
Ydr447c/Yml024w	Rps17b/Rps17a	5	4	5	4.66667	0.57735	9	10	7	8.66667	1.52753	0.893085
Yol086c	Adh1	7	5	6	6	1	9	7	10	8.66667	1.52753	0.530515
Yhr064c	Ssz1	8	9	11	9.33333	1.52753	10	9	7	8.66667	1.52753	-0.106915
Ypl028w	Erg10	3	4	7	4.66667	2.08167	10	8	8	8.66667	1.1547	0.893085
Yor142w	Lsc1	8	7	8	7.66667	0.57735	8	8	10	8.66667	1.1547	0.176878
Ynr050c	Lys9	2	0	1	1	1	9	8	9	8.66667	0.57735	3.11548
Ydl084w	Sub2	13	16	15	14.6667	1.52753	9	9	8	8.66667	0.57735	-0.758992
Yor187w	Tuf1	4	7	5	5.33333	1.52753	5	10	10	8.33333	2.88675	0.643856
Yjr077c	Mir1	7	8	5	6.66667	1.52753	9	10	6	8.33333	2.08167	0.321928
Ydr450w/Yml026c	Rps18a/Rps18b	7	8	7	7.33333	0.57735	9	10	6	8.33333	2.08167	0.184425
Ylr028c	Ade16	9	11	9	9.66667	1.1547	6	10	9	8.33333	2.08167	-0.214125
Ygr185c	Tys1	3	2	3	2.66667	0.57735	10	8	7	8.33333	1.52753	1.64386
Ypr033c	Hts1	3	4	3	3.33333	0.57735	9	8	8	8.33333	0.57735	1.32193
Ydr502c	Sam2	8	8	6	7.33333	1.1547	8	9	8	8.33333	0.57735	0.184425
Yol058w	Arg1	3	5	8	5.33333	2.51661	5	9	10	8	2.64575	0.584963
Ygl195w	Gcn1	15	11	17	14.3333	3.05505	10	5	9	8	2.64575	-0.841302
Yhr104w	Gre3	1	2	2	1.66667	0.57735	6	10	8	8	2	2.26303
Ygr086c	Pil1	9	8	15	10.6667	3.78594	6	10	8	8	2	-0.415037
Ylr438w	Car2	11	15	13	13	2	7	7	10	8	1.73205	-0.70044
Ygr124w	Asn2	2	3	1	2	1	7	9	8	8	1	2
Ybr126c	Tps1	7	7	10	8	1.73205	9	8	7	8	1	0
Yjr123w	Rps5	8	9	8	8.33333	0.57735	8	9	7	8	1	-0.0588937
Yel021w	Ura3	5	11	12	9.33333	3.78594	7	8	9	8	1	-0.222392
Yel034w/Yjr047c	Hyp2/Anb1	0	0	0	0	0	7	9	8	8	1
Yal005c/Yer103w	Ssa1/Ssa4	1	2	1	1.33333	0.57735	6	6	11	7.66667	2.88675	2.52356
Ylr216c	Cpr6	4	4	5	4.33333	0.57735	6	7	10	7.66667	2.08167	0.823122
Ypr145w	Asn1	0	1	2	1	1	6	9	8	7.66667	1.52753	2.9386
Ybr181c/Ypl090c	Rps6b/Rps6a	6	6	7	6.33333	0.57735	9	8	6	7.66667	1.52753	0.275634
Ydl066w	Idp1	9	5	6	6.66667	2.08167	9	6	8	7.66667	1.52753	0.201634
Ydr129c	Sac6	6	6	8	6.66667	1.1547	6	9	8	7.66667	1.52753	0.201634
Yfl037w	Tub2	8	9	9	8.66667	0.57735	6	9	8	7.66667	1.52753	-0.176878
Ygr234w	Yhb1	4	2	3	3	1	7	9	7	7.66667	1.1547	1.35364
Ygl123w	Rps2	5	6	6	5.66667	0.57735	7	7	9	7.66667	1.1547	0.436099
Yor184w	Ser1	5	7	10	7.33333	2.51661	7	9	7	7.66667	1.1547	0.0641303
Ykl085w	Mdh1	1	2	3	2	1	4	8	10	7.33333	3.05505	1.87447
Ydr471w/Yhr010w	Rpl27b/Rpl27a	7	4	6	5.66667	1.52753	10	6	6	7.33333	2.3094	0.371969
Ymr309c	Nip1	8	8	9	8.33333	0.57735	5	9	8	7.33333	2.08167	-0.184425
Ydr214w	Aha1	2	0	3	1.66667	1.52753	6	9	7	7.33333	1.52753	2.1375
Ylr270w	Dcs1	5	4	5	4.66667	0.57735	7	9	6	7.33333	1.52753	0.652077
Ylr197w	Nop56	8	11	11	10	1.73205	7	9	6	7.33333	1.52753	-0.447459
Yml070w	Dak1	1	2	1	1.33333	0.57735	6	8	8	7.33333	1.1547	2.45943
Ydr155c	Cpr1	9	5	8	7.33333	2.08167	6	8	8	7.33333	1.1547	0
Ybr177c	Eht1	1	3	3	2.33333	1.1547	7	7	8	7.33333	0.57735	1.65208
Ypr069c	Spe3	1	2	4	2.33333	1.52753	8	7	7	7.33333	0.57735	1.65208
Ygl148w	Aro2	8	9	11	9.33333	1.52753	7	8	7	7.33333	0.57735	-0.347923
Ygr254w	Eno1	5	4	6	5	1	6	5	10	7	2.64575	0.485427
Ydl083c/Ymr143w	Rps16b/Rps16a	4	4	7	5	1.73205	6	9	6	7	1.73205	0.485427
Ylr249w/Ynl014w	Yef3/Hef3	6	10	8	8	2	6	6	9	7	1.73205	-0.192645
Ymr217w	Gua1	10	10	11	10.3333	0.57735	8	8	5	7	1.73205	-0.561879
Yor168w	Gln4	0	1	2	1	1	6	7	8	7	1	2.80735
Ybr249c	Aro4	2	5	5	4	1.73205	8	7	6	7	1	0.807355
Yjl052w	Tdh1	1	5	6	4	2.64575	6	7	8	7	1	0.807355
Ynr001c	Cit1	6	8	8	7.33333	1.1547	6	8	7	7	1	-0.0671142
Ygr256w/Yhr183w	Gnd2/Gnd1	5	5	5	5	0	7	7	7	7	0	0.485427
Yer086w	Ilv1	5	8	7	6.66667	1.52753	7	7	7	7	0	0.0703893
Ypl048w	Cam1	8	9	7	8	1	7	7	7	7	0	-0.192645
Yjl167w	Erg20	7	2	5	4.66667	2.51661	7	4	9	6.66667	2.51661	0.514573
Yer136w	Gdi1	5	8	6	6.33333	1.52753	5	6	9	6.66667	2.08167	0.0740006
Ymr079w	Sec14	6	6	8	6.66667	1.1547	6	5	9	6.66667	2.08167	0
Yhr027c	Rpn1	0	1	3	1.33333	1.52753	5	8	7	6.66667	1.52753	2.32193
Ypr191w	Qcr2	5	4	6	5	1	7	5	8	6.66667	1.52753	0.415037
Ylr293c/Yor185c	Gsp1/Gsp2	4	6	3	4.33333	1.52753	6	8	6	6.66667	1.1547	0.621488
Ypl218w	Sar1	4	4	7	5	1.73205	8	6	6	6.66667	1.1547	0.415037
Ylr347c	Kap95	3	5	7	5	2	7	7	6	6.66667	0.57735	0.415037
Ygl105w	Arc1	4	5	8	5.66667	2.08167	7	6	7	6.66667	0.57735	0.234465
Yhr042w	Ncp1	5	6	7	6	1	7	7	6	6.66667	0.57735	0.152003
Yil142w	Cct2	5	8	7	6.66667	1.52753	7	6	7	6.66667	0.57735	0
Ygl147c/Ynl067w	Rpl9a/Rpl9b	8	6	7	7	1	7	6	7	6.66667	0.57735	-0.0703893
Yal012w	Cys3	3	6	3	4	1.73205	8	7	4	6.33333	2.08167	0.662965
Ygl037c	Pnc1	5	5	7	5.66667	1.1547	5	6	8	6.33333	1.52753	0.160465
Ymr062c	Arg7	0	1	1	0.666667	0.57735	5	7	7	6.33333	1.1547	3.24793
Yer074w/Yil069c	Rps24a/Rps24b	3	4	4	3.66667	0.57735	7	5	7	6.33333	1.1547	0.788496
Yil053w	Gpp1	3	5	4	4	1	5	7	7	6.33333	1.1547	0.662965
Yjr105w	Ado1	5	7	5	5.66667	1.1547	7	7	5	6.33333	1.1547	0.160465
Ylr340w	Rpp0	6	7	7	6.66667	0.57735	5	7	7	6.33333	1.1547	-0.0740006
Ymr307w	Gas1	7	7	7	7	0	5	7	7	6.33333	1.1547	-0.14439
Ybl045c	Cor1	2	5	5	4	1.73205	6	7	6	6.33333	0.57735	0.662965
Yil094c	Lys12	7	6	5	6	1	7	6	6	6.33333	0.57735	0.0780025
Yal035w	Fun12	4	7	9	6.66667	2.51661	6	6	7	6.33333	0.57735	-0.0740006
Ydl145c	Cop1	14	16	18	16	2	6	6	7	6.33333	0.57735	-1.33703
Ybr248c	His7	1	2	3	2	1	8	6	4	6	2	1.58496
Yil148w/Ykr094c/Yll039c/Ylr167w	Rpl40a/Rpl40b/Ubi4/Rps31	2	2	3	2.33333	0.57735	4	7	7	6	1.73205	1.36257
Ybl072c/Yer102w	Rps8a/Rps8b	3	4	6	4.33333	1.52753	4	7	7	6	1.73205	0.469485
Yjl190c/Ylr367w	Rps22a/Rps22b	4	6	3	4.33333	1.52753	7	7	4	6	1.73205	0.469485
Ydl082w/Ymr142c	Rpl13a/Rpl13b	4	3	2	3	1	7	6	5	6	1	1
Ynl104c	Leu4	3	4	4	3.66667	0.57735	7	5	6	6	1	0.710493
Yml008c	Erg6	4	5	6	5	1	6	5	7	6	1	0.263034
Yjl177w/Ykl180w	Rpl17b/Rpl17a	4	7	6	5.66667	1.52753	5	7	6	6	1	0.0824622
Ylr441c/Yml063w	Rps1a/Rps1b	9	7	7	7.66667	1.1547	6	6	6	6	0	-0.353637
Yer133w	Glc7	5	6	5	5.33333	0.57735	2	7	8	5.66667	3.21455	0.0874628
Ynl287w	Sec21	3	3	6	4	1.73205	5	4	8	5.66667	2.08167	0.5025
Ydr238c	Sec26	12	9	14	11.6667	2.51661	4	8	5	5.66667	2.08167	-1.04182
Yfl022c	Frs2	1	0	1	0.666667	0.57735	4	7	6	5.66667	1.52753	3.08746
Ylr180w	Sam1	5	4	4	4.33333	0.57735	6	4	7	5.66667	1.52753	0.387023
Ydl014w	Nop1	8	6	10	8	2	4	6	7	5.66667	1.52753	-0.4975
Yfl045c	Sec53	9	7	9	8.33333	1.1547	7	4	6	5.66667	1.52753	-0.556393
Ydr487c	Rib3	0	0	0	0	0	4	6	7	5.66667	1.52753
Ylr060w	Frs1	1	0	1	0.666667	0.57735	5	5	7	5.66667	1.1547	3.08746
Ykl067w	Ynk1	4	4	5	4.33333	0.57735	7	5	5	5.66667	1.1547	0.387023
Ygr282c	Bgl2	17	19	9	15	5.2915	7	5	5	5.66667	1.1547	-1.40439
Yor332w	Vma4	6	4	5	5	1	6	6	5	5.66667	0.57735	0.180572
Ymr012w	Clu1	5	7	5	5.66667	1.1547	6	5	6	5.66667	0.57735	0
Ypl004c	Lsp1	10	9	12	10.3333	1.52753	6	5	6	5.66667	0.57735	-0.866733
Yor096w	Rps7a	4	5	5	4.66667	0.57735	3	6	7	5.33333	2.08167	0.192645
Yir034c	Lys1	5	5	3	4.33333	1.1547	4	5	7	5.33333	1.52753	0.29956
Ybr011c	Ipp1	5	5	8	6	1.73205	4	7	5	5.33333	1.52753	-0.169925
Ydr293c	Ssd1	7	3	8	6	2.64575	4	5	7	5.33333	1.52753	-0.169925
Yil125w	Kgd1	2	4	0	2	2	4	6	6	5.33333	1.1547	1.41504
Ypr183w	Dpm1	2	3	2	2.33333	0.57735	6	4	6	5.33333	1.1547	1.19265
Ymr189w	Gcv2	3	3	4	3.33333	0.57735	6	6	4	5.33333	1.1547	0.678072
Ycr031c/Yjl191w	Rps14a/Rps14b	7	5	5	5.66667	1.1547	6	4	6	5.33333	1.1547	-0.0874628
Yol040c	Rps15	3	1	3	2.33333	1.1547	5	5	6	5.33333	0.57735	1.19265
Ycl009c	Ilv6	4	2	4	3.33333	1.1547	5	5	6	5.33333	0.57735	0.678072
Ybr218c/Ygl062w	Pyc2/Pyc1	3	7	3	4.33333	2.3094	5	5	6	5.33333	0.57735	0.29956
Yhl015w	Rps20	5	5	5	5	0	5	6	5	5.33333	0.57735	0.0931094
Ygl173c	Xrn1	11	12	14	12.3333	1.52753	5	6	5	5.33333	0.57735	-1.20945
Ygl202w	Aro8	3	2	2	2.33333	0.57735	3	5	7	5	2	1.09954
Ygl103w	Rpl28	4	2	2	2.66667	1.1547	7	3	5	5	2	0.906891
Ybr221c	Pdb1	2	5	3	3.33333	1.52753	3	5	7	5	2	0.584963
Ydr226w	Adk1	1	1	1	1	0	4	7	4	5	1.73205	2.32193
Yjl153c	Ino1	6	7	8	7	1	6	3	6	5	1.73205	-0.485427
Yjr148w	Bat2	1	1	2	1.33333	0.57735	4	6	5	5	1	1.90689
Yml126c	Erg13	2	2	1	1.66667	0.57735	6	4	5	5	1	1.58496
Ylr447c	Vma6	2	2	2	2	0	5	6	4	5	1	1.32193
Ydl095w	Pmt1	2	2	3	2.33333	0.57735	4	5	6	5	1	1.09954
Yer073w	Ald5	2	3	4	3	1	6	5	4	5	1	0.736966
Yer081w/Yil074c	Ser3/Ser33	3	4	4	3.66667	0.57735	5	6	4	5	1	0.447459
Ylr208w	Sec13	4	3	4	3.66667	0.57735	6	4	5	5	1	0.447459
Ygr034w/Ylr344w	Rpl26b/Rpl26a	4	4	5	4.33333	0.57735	6	4	5	5	1	0.206451
Ymr315w	Ymr315w	6	4	3	4.33333	1.52753	4	5	6	5	1	0.206451
Ydl195w	Sec31	7	6	4	5.66667	1.52753	4	5	6	5	1	-0.180572
Ylr028c/Ymr120c	Ade16/Ade17	6	7	8	7	1	5	4	6	5	1	-0.485427
Ybr079c	Rpg1	5	8	10	7.66667	2.51661	5	4	6	5	1	-0.616671
Yer025w	Gcd11	6	9	8	7.66667	1.52753	4	6	5	5	1	-0.616671
Ybr048w/Ydr025w	Rps11b/Rps11a	4	5	4	4.33333	0.57735	5	5	5	5	0	0.206451
Ybl027w/Ybr084c-a	Rpl19b/Rpl19a	7	5	5	5.66667	1.1547	5	5	5	5	0	-0.180572
Ygr087c/Ylr044c/Ylr134w	Pdc6/Pdc1/Pdc5	1	1	2	1.33333	0.57735	2	3	9	4.66667	3.78594	1.80735
Yjl008c	Cct8	2	5	5	4	1.73205	2	5	7	4.66667	2.51661	0.222392
Ylr027c	Aat2	2	4	3	3	1	2	6	6	4.66667	2.3094	0.63743
Ybr035c	Pdx3	1	2	1	1.33333	0.57735	3	6	5	4.66667	1.52753	1.80735
Ymr083w	Adh3	1	3	3	2.33333	1.1547	5	3	6	4.66667	1.52753	1
Yor323c	Pro2	1	4	2	2.33333	1.52753	3	6	5	4.66667	1.52753	1
Ydl182w	Lys20	2	2	4	2.66667	1.1547	3	6	5	4.66667	1.52753	0.807355
Ydr188w	Cct6	3	4	5	4	1	3	5	6	4.66667	1.52753	0.222392
Ybr169c	Sse2	3	6	7	5.33333	2.08167	3	5	6	4.66667	1.52753	-0.192645
Ydl100c	Get3	5	5	7	5.66667	1.1547	3	5	6	4.66667	1.52753	-0.280108
Ydl137w/Ydl192w	Arf2/Arf1	6	6	7	6.33333	0.57735	6	5	3	4.66667	1.52753	-0.440573
Yor310c	Nop58	7	7	8	7.33333	0.57735	3	6	5	4.66667	1.52753	-0.652077
Yer125w	Rsp5	6	8	11	8.33333	2.51661	3	6	5	4.66667	1.52753	-0.836501
Yfl016c	Mdj1	1	5	3	3	2	4	6	4	4.66667	1.1547	0.63743
Yal003w	Efb1	4	4	5	4.33333	0.57735	4	6	4	4.66667	1.1547	0.106915
Yor128c	Ade2	6	5	5	5.33333	0.57735	4	4	6	4.66667	1.1547	-0.192645
Ybr169c/Ypl106c	Sse2/Sse1	4	3	1	2.66667	1.52753	4	5	5	4.66667	0.57735	0.807355
Ynl069c	Rpl16b	4	4	4	4	0	5	5	4	4.66667	0.57735	0.222392
Ynl302c/Yol121c	Rps19b/Rps19a	3	4	5	4	1	5	4	5	4.66667	0.57735	0.222392
Ymr230w/Yor293w	Rps10b/Rps10a	4	5	5	4.66667	0.57735	5	4	5	4.66667	0.57735	0
Ypr035w	Gln1	5	5	4	4.66667	0.57735	4	5	5	4.66667	0.57735	0
Ydl078c	Mdh3	5	4	7	5.33333	1.52753	5	5	4	4.66667	0.57735	-0.192645
Ybr143c	Sup45	5	4	8	5.66667	2.08167	5	5	4	4.66667	0.57735	-0.280108
Ypl226w	New1	9	7	6	7.33333	1.52753	5	5	4	4.66667	0.57735	-0.652077
Ygr157w	Cho2	0	1	2	1	1	3	3	7	4.33333	2.3094	2.11548
Ydr158w	Hom2	4	6	6	5.33333	1.1547	2	6	5	4.33333	2.08167	-0.29956
Yml100w	Tsl1	8	6	2	5.33333	3.05505	5	6	2	4.33333	2.08167	-0.29956
Yel030w/Yjr045c	Ecm10/Ssc1	1	2	2	1.66667	0.57735	3	6	4	4.33333	1.52753	1.37851
Ymr226c	Ymr226c	0	3	3	2	1.73205	6	3	4	4.33333	1.52753	1.11548
Ygr285c	Zuo1	4	6	7	5.66667	1.52753	6	3	4	4.33333	1.52753	-0.387023
Yer052c	Hom3	7	7	6	6.66667	0.57735	3	4	6	4.33333	1.52753	-0.621488
Ygl137w	Sec27	7	9	10	8.66667	1.52753	3	6	4	4.33333	1.52753	-1
Yer036c	Arb1	9	10	11	10	1	4	3	6	4.33333	1.52753	-1.20645
Ydl174c	Dld1	1	2	0	1	1	3	5	5	4.33333	1.1547	2.11548
Ynl010w	Ynl010w	2	2	1	1.66667	0.57735	3	5	5	4.33333	1.1547	1.37851
Ybr189w/Ypl081w	Rps9b/Rps9a	3	4	4	3.66667	0.57735	5	3	5	4.33333	1.1547	0.241008
Ycr009c	Rvs161	3	4	4	3.66667	0.57735	3	5	5	4.33333	1.1547	0.241008
Ymr300c	Ade4	0	1	1	0.666667	0.57735	4	4	5	4.33333	0.57735	2.70044
Ydr019c	Gcv1	1	0	2	1	1	5	4	4	4.33333	0.57735	2.11548
Ykl211c	Trp3	1	1	2	1.33333	0.57735	5	4	4	4.33333	0.57735	1.70044
Yor136w	Idh2	2	1	1	1.33333	0.57735	4	5	4	4.33333	0.57735	1.70044
Ynl104c/Yor108w	Leu4/Leu9	2	2	3	2.33333	0.57735	4	4	5	4.33333	0.57735	0.893085
Yjr073c	Opi3	3	3	4	3.33333	0.57735	5	4	4	4.33333	0.57735	0.378512
Yhl001w/Ykl006w	Rpl14b/Rpl14a	2	4	4	3.33333	1.1547	2	6	4	4	2	0.263034
Ydl136w/Ydl191w	Rpl35b/Rpl35a	4	3	4	3.66667	0.57735	2	4	6	4	2	0.125531
Yjr065c	Arp3	7	6	5	6	1	4	2	6	4	2	-0.584963
Ygr264c	Mes1	10	4	6	6.66667	3.05505	2	6	4	4	2	-0.736966
Yel047c	Frd1	1	1	2	1.33333	0.57735	5	2	5	4	1.73205	1.58496
Ygr211w	Zpr1	1	1	2	1.33333	0.57735	2	5	5	4	1.73205	1.58496
Yhr179w	Oye2	3	3	4	3.33333	0.57735	5	5	2	4	1.73205	0.263034
Ygr214w/Ylr048w	Rps0a/Rps0b	5	3	6	4.66667	1.52753	3	3	6	4	1.73205	-0.222392
Ydr533c	Hsp31	0	0	1	0.333333	0.57735	3	4	5	4	1	3.58496
Yel046c	Gly1	0	1	1	0.666667	0.57735	3	5	4	4	1	2.58496
Yil075c	Rpn2	0	1	1	0.666667	0.57735	4	5	3	4	1	2.58496
Yhr068w	Dys1	1	1	1	1	0	3	5	4	4	1	2
Ykl150w	Mcr1	1	3	2	2	1	3	5	4	4	1	1
Yfr044c	Dug1	1	3	3	2.33333	1.1547	4	5	3	4	1	0.777608
Ynl189w	Srp1	2	1	4	2.33333	1.52753	5	4	3	4	1	0.777608
Ydr298c	Atp5	3	4	1	2.66667	1.52753	4	5	3	4	1	0.584963
Yjl172w	Cps1	2	2	4	2.66667	1.1547	5	3	4	4	1	0.584963
Ynl301c/Yol120c	Rpl18b/Rpl18a	3	5	2	3.33333	1.52753	4	5	3	4	1	0.263034
Ybr039w	Atp3	3	4	4	3.66667	0.57735	3	5	4	4	1	0.125531
Yll050c	Cof1	4	4	4	4	0	4	3	5	4	1	0
Ymr146c	Tif34	1	6	5	4	2.64575	4	5	3	4	1	0
Ykl080w	Vma5	4	3	6	4.33333	1.52753	5	3	4	4	1	-0.115477
Ydl160c	Dhh1	5	4	5	4.66667	0.57735	3	4	5	4	1	-0.222392
Ydr032c	Pst2	5	6	6	5.66667	0.57735	3	4	5	4	1	-0.5025
Ynl037c	Idh1	0	0	0	0	0	5	3	4	4	1
Ynl239w	Lap3	2	0	1	1	1	4	4	4	4	0	2
Ydr382w	Rpp2b	2	1	1	1.33333	0.57735	4	4	4	4	0	1.58496
Yor117w	Rpt5	1	2	2	1.66667	0.57735	4	4	4	4	0	1.26303
Ygl255w	Zrt1	3	2	3	2.66667	0.57735	4	4	4	4	0	0.584963
Ygr209c	Trx2	4	3	2	3	1	4	4	4	4	0	0.415037
Ymr242c/Yor312c	Rpl20a/Rpl20b	4	4	3	3.66667	0.57735	4	4	4	4	0	0.125531
Yal016w	Tpd3	3	6	3	4	1.73205	4	4	4	4	0	0
Ygr218w	Crm1	4	4	6	4.66667	1.1547	6	4	1	3.66667	2.51661	-0.347923
Ybl039c	Ura7	5	5	2	4	1.73205	2	6	3	3.66667	2.08167	-0.125531
Yor046c	Dbp5	1	1	1	1	0	2	4	5	3.66667	1.52753	1.87447
Ybr084w	Mis1	3	2	2	2.33333	0.57735	2	4	5	3.66667	1.52753	0.652077
Yor270c	Vph1	3	4	2	3	1	5	4	2	3.66667	1.52753	0.289507
Ydl131w	Lys21	3	6	6	5	1.73205	5	2	4	3.66667	1.52753	-0.447459
Ypr036w	Vma13	6	7	6	6.33333	0.57735	2	5	4	3.66667	1.52753	-0.788496
Yar015w	Ade1	0	0	1	0.333333	0.57735	3	4	4	3.66667	0.57735	3.45943
Yol151w	Gre2	1	0	0	0.333333	0.57735	3	4	4	3.66667	0.57735	3.45943
Yer103w/Yll024c	Ssa4/Ssa2	1	2	2	1.66667	0.57735	3	4	4	3.66667	0.57735	1.1375
Ydr064w	Rps13	4	3	2	3	1	4	3	4	3.66667	0.57735	0.289507
Yjl014w	Cct3	4	3	4	3.66667	0.57735	4	4	3	3.66667	0.57735	0
Ykl212w	Sac1	5	3	3	3.66667	1.1547	3	4	4	3.66667	0.57735	0
Ylr029c/Ymr121c	Rpl15a/Rpl15b	4	5	5	4.66667	0.57735	4	3	4	3.66667	0.57735	-0.347923
Ylr300w	Exg1	5	7	9	7	2	4	3	4	3.66667	0.57735	-0.932886
Ygr279c	Scw4	8	8	7	7.66667	0.57735	4	4	3	3.66667	0.57735	-1.06413
Ykl081w	Tef4	9	7	8	8	1	3	4	4	3.66667	0.57735	-1.12553
Yor209c	Npt1	0	0	0	0	0	4	4	3	3.66667	0.57735
Yer081w	Ser3	0	0	1	0.333333	0.57735	1	3	6	3.33333	2.51661	3.32193
Yer003c	Pmi40	0	1	1	0.666667	0.57735	2	5	3	3.33333	1.52753	2.32193
Ydr071c	Paa1	3	2	2	2.33333	0.57735	5	2	3	3.33333	1.52753	0.514573
Ypl235w	Rvb2	2	4	4	3.33333	1.1547	2	3	5	3.33333	1.52753	0
Yil116w	His5	4	5	3	4	1	3	5	2	3.33333	1.52753	-0.263034
Ydr035w	Aro3	0	0	1	0.333333	0.57735	4	2	4	3.33333	1.1547	3.32193
Yml106w	Ura5	1	1	1	1	0	4	2	4	3.33333	1.1547	1.73697
Yel002c	Wbp1	2	3	3	2.66667	0.57735	2	4	4	3.33333	1.1547	0.321928
Yol127w	Rpl25	3	4	4	3.66667	0.57735	2	4	4	3.33333	1.1547	-0.137504
Ygr189c	Crh1	7	6	8	7	1	4	4	2	3.33333	1.1547	-1.07039
Ymr318c	Adh6	0	1	0	0.333333	0.57735	4	3	3	3.33333	0.57735	3.32193
Ymr145c	Nde1	1	1	1	1	0	4	3	3	3.33333	0.57735	1.73697
Ymr096w	Snz1	1	1	2	1.33333	0.57735	3	4	3	3.33333	0.57735	1.32193
Yil074c	Ser33	2	2	3	2.33333	0.57735	3	3	4	3.33333	0.57735	0.514573
Ykl196c	Ykt6	2	2	3	2.33333	0.57735	4	3	3	3.33333	0.57735	0.514573
Ynl071w	Lat1	2	2	4	2.66667	1.1547	3	4	3	3.33333	0.57735	0.321928
Ypl225w	Ypl225w	3	3	2	2.66667	0.57735	3	4	3	3.33333	0.57735	0.321928
Ypr160w	Gph1	2	2	4	2.66667	1.1547	3	3	4	3.33333	0.57735	0.321928
Ydr233c	Rtn1	3	3	3	3	0	4	3	3	3.33333	0.57735	0.152003
Yhr107c	Cdc12	3	5	3	3.66667	1.1547	4	3	3	3.33333	0.57735	-0.137504
Ygl008c	Pma1	5	5	7	5.66667	1.1547	3	4	3	3.33333	0.57735	-0.765535
Ygl207w	Spt16	7	10	6	7.66667	2.08167	3	4	3	3.33333	0.57735	-1.20163
Ynl247w	Ynl247w	0	0	0	0	0	3	3	4	3.33333	0.57735
Ymr303c/Yol086c	Adh2/Adh1	2	1	3	2	1	5	1	3	3	2	0.584963
Ylr244c	Map1	0	1	0	0.333333	0.57735	2	2	5	3	1.73205	3.16993
Ydr388w	Rvs167	1	2	1	1.33333	0.57735	2	5	2	3	1.73205	1.16993
Yal062w/Yor375c	Gdh3/Gdh1	2	2	4	2.66667	1.1547	5	2	2	3	1.73205	0.169925
Ydr372c	Vps74	3	4	3	3.33333	0.57735	2	2	5	3	1.73205	-0.152003
Ymr308c	Pse1	0	1	0	0.333333	0.57735	3	4	2	3	1	3.16993
Ybr056w	Ybr056w	0	2	0	0.666667	1.1547	2	3	4	3	1	2.16993
Ygr087c/Ylr044c	Pdc6/Pdc1	1	1	1	1	0	2	3	4	3	1	1.58496
Yml078w	Cpr3	1	1	1	1	0	2	4	3	3	1	1.58496
Ymr246w	Faa4	0	1	2	1	1	3	2	4	3	1	1.58496
Yel026w	Snu13	1	1	2	1.33333	0.57735	4	2	3	3	1	1.16993
Ypr110c	Rpc40	1	2	1	1.33333	0.57735	4	2	3	3	1	1.16993
Yal023c	Pmt2	1	2	3	2	1	2	3	4	3	1	0.584963
Ylr179c	Ylr179c	1	2	3	2	1	4	3	2	3	1	0.584963
Ypr041w	Tif5	2	3	3	2.66667	0.57735	2	4	3	3	1	0.169925
Yll045c	Rpl8b	3	3	3	3	0	3	4	2	3	1	0
Ylr359w	Ade13	4	2	3	3	1	2	3	4	3	1	0
Ycl037c	Sro9	2	5	3	3.33333	1.52753	3	4	2	3	1	-0.152003
Yml085c	Tub1	2	4	4	3.33333	1.1547	2	4	3	3	1	-0.152003
Yjr094w-a/Ypr043w	Rpl43b/Rpl43a	4	3	4	3.66667	0.57735	2	4	3	3	1	-0.289507
Ynl096c	Rps7b	4	3	4	3.66667	0.57735	4	3	2	3	1	-0.289507
Ykr048c	Nap1	4	5	3	4	1	2	3	4	3	1	-0.415037
Yol139c	Cdc33	4	5	5	4.66667	0.57735	2	3	4	3	1	-0.63743
Yer175c	Tmt1	0	0	0	0	0	2	4	3	3	1
Yml022w	Apt1	0	0	0	0	0	3	2	4	3	1
Ybl003c/Ydr225w	Hta2/Hta1	3	2	1	2	1	3	3	3	3	0	0.584963
Ynl044w	Yip3	3	1	2	2	1	3	3	3	3	0	0.584963
Yor007c	Sgt2	2	2	2	2	0	3	3	3	3	0	0.584963
Ypl145c	Kes1	3	2	3	2.66667	0.57735	3	3	3	3	0	0.169925
Ybr009c/Ynl030w	Hhf1/Hhf2	3	3	3	3	0	3	3	3	3	0	0
Ydr190c	Rvb1	2	3	4	3	1	3	3	3	3	0	0
Ygl031c/Ygr148c	Rpl24a/Rpl24b	2	3	4	3	1	3	3	3	3	0	0
Ybl087c/Yer117w	Rpl23a/Rpl23b	4	3	3	3.33333	0.57735	3	3	3	3	0	-0.152003
Ydr513w	Grx2	3	3	4	3.33333	0.57735	3	3	3	3	0	-0.152003
Yfl038c	Ypt1	4	3	3	3.33333	0.57735	3	3	3	3	0	-0.152003
Yor361c	Prt1	4	6	6	5.33333	1.1547	3	3	3	3	0	-0.830075
Ydr345c	Hxt3	1	2	2	1.66667	0.57735	2	5	1	2.66667	2.08167	0.678072
Ydl097c	Rpn6	1	1	2	1.33333	0.57735	1	3	4	2.66667	1.52753	1
Yml086c	Alo1	1	1	2	1.33333	0.57735	1	4	3	2.66667	1.52753	1
Ygr054w	Ygr054w	3	3	2	2.66667	0.57735	1	3	4	2.66667	1.52753	0
Ybl002w/Ydr224c	Htb2/Htb1	3	3	3	3	0	1	4	3	2.66667	1.52753	-0.169925
Yil076w	Sec28	1	3	5	3	2	1	3	4	2.66667	1.52753	-0.169925
Yhr063c	Pan5	0	1	0	0.333333	0.57735	2	2	4	2.66667	1.1547	3
Yel013w	Vac8	1	1	1	1	0	4	2	2	2.66667	1.1547	1.41504
Ypl262w	Fum1	3	1	3	2.33333	1.1547	4	2	2	2.66667	1.1547	0.192645
Ygr027c/Ylr333c	Rps25a/Rps25b	3	6	4	4.33333	1.52753	2	4	2	2.66667	1.1547	-0.70044
Ymr202w	Erg2	0	0	1	0.333333	0.57735	2	3	3	2.66667	0.57735	3
Ygl048c	Rpt6	0	1	1	0.666667	0.57735	2	3	3	2.66667	0.57735	2
Ygr080w	Twf1	0	2	0	0.666667	1.1547	3	3	2	2.66667	0.57735	2
Ybl075c/Yer103w	Ssa3/Ssa4	0	2	1	1	1	3	2	3	2.66667	0.57735	1.41504
Ylr432w	Imd3	1	1	1	1	0	3	2	3	2.66667	0.57735	1.41504
Yol059w	Gpd2	3	0	1	1.33333	1.52753	3	2	3	2.66667	0.57735	1
Q0250	Cox2	2	2	1	1.66667	0.57735	2	3	3	2.66667	0.57735	0.678072
Ybr046c	Zta1	2	1	2	1.66667	0.57735	2	3	3	2.66667	0.57735	0.678072
Ylr196w	Pwp1	2	1	2	1.66667	0.57735	3	3	2	2.66667	0.57735	0.678072
Yor122c	Pfy1	2	2	1	1.66667	0.57735	3	3	2	2.66667	0.57735	0.678072
Ylr029c	Rpl15a	1	3	2	2	1	2	3	3	2.66667	0.57735	0.415037
Ymr203w	Tom40	4	3	1	2.66667	1.52753	3	3	2	2.66667	0.57735	0
Ygl055w	Ole1	3	1	5	3	2	3	3	2	2.66667	0.57735	-0.169925
Ymr207c/Ynr016c	Hfa1/Acc1	3	3	3	3	0	2	3	3	2.66667	0.57735	-0.169925
Ynl138w	Srv2	2	4	3	3	1	3	3	2	2.66667	0.57735	-0.169925
Yjl111w	Cct7	3	4	3	3.33333	0.57735	3	2	3	2.66667	0.57735	-0.321928
Yel060c	Prb1	4	4	4	4	0	3	2	3	2.66667	0.57735	-0.584963
Yjr007w	Sui2	5	3	5	4.33333	1.1547	3	2	3	2.66667	0.57735	-0.70044
Ydr212w	Tcp1	6	4	5	5	1	2	3	3	2.66667	0.57735	-0.906891
Yol154w	Zps1	5	5	7	5.66667	1.1547	3	2	3	2.66667	0.57735	-1.08746
Yjl159w	Hsp150	26	33	33	30.6667	4.04145	3	3	2	2.66667	0.57735	-3.52356
Ydr368w	Ypr1	0	0	0	0	0	3	3	2	2.66667	0.57735
Yhr025w	Thr1	0	0	0	0	0	2	3	3	2.66667	0.57735
Ybr256c	Rib5	1	0	0	0.333333	0.57735	1	4	2	2.33333	1.52753	2.80735
Ydl072c	Yet3	0	1	1	0.666667	0.57735	1	4	2	2.33333	1.52753	1.80735
Ybr159w	Ifa38	1	2	1	1.33333	0.57735	1	4	2	2.33333	1.52753	0.807355
Ydl198c	Ggc1	1	2	1	1.33333	0.57735	1	4	2	2.33333	1.52753	0.807355
Ygl156w	Ams1	2	0	4	2	2	1	4	2	2.33333	1.52753	0.222392
Yjr139c	Hom6	1	2	3	2	1	1	2	4	2.33333	1.52753	0.222392
Ybr191w/Ypl079w	Rpl21a/Rpl21b	4	3	2	3	1	4	2	1	2.33333	1.52753	-0.36257
Yml130c	Ero1	0	0	0	0	0	2	4	1	2.33333	1.52753
Ydr516c	Emi2	1	0	0	0.333333	0.57735	3	1	3	2.33333	1.1547	2.80735
Ydr074w	Tps2	0	2	0	0.666667	1.1547	1	3	3	2.33333	1.1547	1.80735
Ygl097w	Srm1	1	1	0	0.666667	0.57735	1	3	3	2.33333	1.1547	1.80735
Ynl121c	Tom70	0	2	1	1	1	1	3	3	2.33333	1.1547	1.22239
Yhr049w	Fsh1	0	0	0	0	0	1	3	3	2.33333	1.1547
Ybl075c/Yll024c	Ssa3/Ssa2	0	1	0	0.333333	0.57735	2	3	2	2.33333	0.57735	2.80735
Ymr038c	Ccs1	0	0	1	0.333333	0.57735	2	3	2	2.33333	0.57735	2.80735
Ygl157w	Ari1	2	0	0	0.666667	1.1547	3	2	2	2.33333	0.57735	1.80735
Yor259c	Rpt4	0	1	1	0.666667	0.57735	2	2	3	2.33333	0.57735	1.80735
Yhr190w	Erg9	0	2	1	1	1	2	2	3	2.33333	0.57735	1.22239
Ymr196w	Ymr196w	0	1	2	1	1	3	2	2	2.33333	0.57735	1.22239
Ybr080c	Sec18	0	1	3	1.33333	1.52753	3	2	2	2.33333	0.57735	0.807355
Yil124w	Ayr1	1	1	2	1.33333	0.57735	2	3	2	2.33333	0.57735	0.807355
Ykl180w	Rpl17a	2	1	1	1.33333	0.57735	3	2	2	2.33333	0.57735	0.807355
Ylr325c	Rpl38	1	2	1	1.33333	0.57735	2	2	3	2.33333	0.57735	0.807355
Ynl241c	Zwf1	1	1	2	1.33333	0.57735	3	2	2	2.33333	0.57735	0.807355
Ybr106w	Pho88	1	2	2	1.66667	0.57735	2	2	3	2.33333	0.57735	0.485427
Ycr088w	Abp1	1	1	3	1.66667	1.1547	2	2	3	2.33333	0.57735	0.485427
Ydl007w	Rpt2	2	1	2	1.66667	0.57735	3	2	2	2.33333	0.57735	0.485427
Ydr394w	Rpt3	1	2	2	1.66667	0.57735	2	3	2	2.33333	0.57735	0.485427
Yal038w/Yor347c	Cdc19/Pyk2	2	3	1	2	1	3	2	2	2.33333	0.57735	0.222392
Ybr010w/Ynl031c	Hht1/Hht2	2	2	2	2	0	2	2	3	2.33333	0.57735	0.222392
Yil133c	Rpl16a	1	3	2	2	1	2	2	3	2.33333	0.57735	0.222392
Yml035c	Amd1	2	2	2	2	0	3	2	2	2.33333	0.57735	0.222392
Yjr009c	Tdh2	3	2	2	2.33333	0.57735	2	3	2	2.33333	0.57735	0
Ylr150w	Stm1	1	3	3	2.33333	1.1547	2	2	3	2.33333	0.57735	0
Ykl056c	Tma19	1	3	4	2.66667	1.52753	2	2	3	2.33333	0.57735	-0.192645
Ynr035c	Arc35	1	3	4	2.66667	1.52753	3	2	2	2.33333	0.57735	-0.192645
Ydl029w	Arp2	3	3	3	3	0	2	2	3	2.33333	0.57735	-0.36257
Ydr171w	Hsp42	3	3	3	3	0	2	2	3	2.33333	0.57735	-0.36257
Ykl013c	Arc19	3	3	3	3	0	2	2	3	2.33333	0.57735	-0.36257
Ykl120w	Oac1	4	3	2	3	1	2	2	3	2.33333	0.57735	-0.36257
Ylr448w/Yml073c	Rpl6b/Rpl6a	3	3	3	3	0	2	3	2	2.33333	0.57735	-0.36257
Ygr118w/Ypr132w	Rps23a/Rps23b	3	4	3	3.33333	0.57735	2	2	3	2.33333	0.57735	-0.514573
Yer177w	Bmh1	5	4	4	4.33333	0.57735	2	3	2	2.33333	0.57735	-0.893085
Yjl117w	Pho86	0	0	0	0	0	2	3	2	2.33333	0.57735
Ymr027w	Ymr027w	0	0	0	0	0	2	3	2	2.33333	0.57735
Ynl281w	Hch1	0	0	0	0	0	2	2	3	2.33333	0.57735
Ylr043c	Trx1	1	4	2	2.33333	1.52753	0	4	2	2	2	-0.222392
Yor164c	Get4	5	3	3	3.66667	1.1547	0	2	4	2	2	-0.874469
Ylr351c	Nit3	0	0	1	0.333333	0.57735	1	1	4	2	1.73205	2.58496
Yjr064w	Cct5	4	4	4	4	0	0	3	3	2	1.73205	-1
Ydr091c	Rli1	0	0	0	0	0	0	3	3	2	1.73205
Ydr454c	Guk1	0	0	0	0	0	1	1	4	2	1.73205
Yer021w	Rpn3	0	0	0	0	0	0	3	3	2	1.73205
Ybr082c	Ubc4	1	0	0	0.333333	0.57735	2	3	1	2	1	2.58496
Ylr304c	Aco1	1	0	0	0.333333	0.57735	2	1	3	2	1	2.58496
Ymr099c	Ymr099c	0	0	1	0.333333	0.57735	1	3	2	2	1	2.58496
Ydr353w	Trr1	1	0	1	0.666667	0.57735	2	1	3	2	1	1.58496
Ydr529c	Qcr7	1	0	1	0.666667	0.57735	1	3	2	2	1	1.58496
Yhr030c	Slt2	2	0	0	0.666667	1.1547	1	2	3	2	1	1.58496
Ygl030w	Rpl30	0	1	2	1	1	3	1	2	2	1	1
Yhl021c	Aim17	2	0	1	1	1	1	2	3	2	1	1
Ybr234c	Arc40	1	3	1	1.66667	1.1547	1	3	2	2	1	0.263034
Ydr033w	Mrh1	1	2	3	2	1	1	2	3	2	1	0
Yfl059w/Ymr096w/Ynl333w	Snz3/Snz1/Snz2	3	2	1	2	1	3	1	2	2	1	0
Ylr432w/Yml056c	Imd3/Imd4	2	2	2	2	0	3	2	1	2	1	0
Yer056c-a/Yil052c	Rpl34a/Rpl34b	2	2	3	2.33333	0.57735	2	1	3	2	1	-0.222392
Yer120w	Scs2	2	2	3	2.33333	0.57735	1	2	3	2	1	-0.222392
Ygr032w	Gsc2	3	2	2	2.33333	0.57735	1	3	2	2	1	-0.222392
Ycr002c	Cdc10	2	4	5	3.66667	1.52753	2	1	3	2	1	-0.874469
Ydr001c	Nth1	4	2	5	3.66667	1.52753	1	3	2	2	1	-0.874469
Ymr194w/Ypl249c-a	Rpl36a/Rpl36b	3	4	4	3.66667	0.57735	3	2	1	2	1	-0.874469
Ybl015w	Ach1	0	0	0	0	0	2	3	1	2	1
Ybr115c	Lys2	0	0	0	0	0	1	2	3	2	1
Ybr236c	Abd1	0	0	0	0	0	1	2	3	2	1
Ydr427w	Rpn9	0	0	0	0	0	3	1	2	2	1
Ygr267c	Fol2	0	0	0	0	0	3	1	2	2	1
Ylr342w	Fks1	0	0	0	0	0	3	2	1	2	1
Yml048w	Gsf2	0	0	0	0	0	2	3	1	2	1
Ypr004c	Aim45	0	0	0	0	0	2	3	1	2	1
Yer044c	Erg28	0	1	0	0.333333	0.57735	2	2	2	2	0	2.58496
Yjr014w	Tma22	1	0	0	0.333333	0.57735	2	2	2	2	0	2.58496
Ydl192w	Arf1	1	0	2	1	1	2	2	2	2	0	1
Ylr167w	Rps31	1	1	1	1	0	2	2	2	2	0	1
Ymr235c	Rna1	1	0	2	1	1	2	2	2	2	0	1
Ydl075w/Ylr406c	Rpl31a/Rpl31b	1	1	2	1.33333	0.57735	2	2	2	2	0	0.584963
Ymr241w	Yhm2	2	2	1	1.66667	0.57735	2	2	2	2	0	0.263034
Ymr297w	Prc1	2	2	1	1.66667	0.57735	2	2	2	2	0	0.263034
Ypr165w	Rho1	1	2	2	1.66667	0.57735	2	2	2	2	0	0.263034
Ydl081c	Rpp1a	2	2	2	2	0	2	2	2	2	0	0
Ymr083w/Yol086c	Adh3/Adh1	2	2	2	2	0	2	2	2	2	0	0
Ypl237w	Sui3	2	1	3	2	1	2	2	2	2	0	0
Yal005c/Ybl075c/Yll024c	Ssa1/Ssa3/Ssa2	6	1	1	2.66667	2.88675	2	2	2	2	0	-0.415037
Yfr051c	Ret2	3	1	4	2.66667	1.52753	2	2	2	2	0	-0.415037
Ybl092w	Rpl32	4	2	3	3	1	2	2	2	2	0	-0.584963
Yml085c/Yml124c	Tub1/Tub3	3	2	4	3	1	2	2	2	2	0	-0.584963
Yil043c	Cbr1	4	3	3	3.33333	0.57735	2	2	2	2	0	-0.736966
Ydl143w	Cct4	2	5	5	4	1.73205	2	2	2	2	0	-1
Ybr101c	Fes1	0	0	0	0	0	2	2	2	2	0
Ydr476c	Ydr476c	0	0	0	0	0	2	2	2	2	0
Ygr159c	Nsr1	1	2	2	1.66667	0.57735	0	4	1	1.66667	2.08167	0
Yol097c	Wrs1	1	1	3	1.66667	1.1547	0	1	4	1.66667	2.08167	0
Yor120w	Gcy1	0	0	0	0	0	0	1	4	1.66667	2.08167
Ydr432w	Npl3	3	4	5	4	1	0	3	2	1.66667	1.52753	-1.26303
Yhr108w	Gga2	1	1	0	0.666667	0.57735	3	1	1	1.66667	1.1547	1.32193
Ybl064c	Prx1	1	1	2	1.33333	0.57735	3	1	1	1.66667	1.1547	0.321928
Ypl078c	Atp4	1	2	1	1.33333	0.57735	1	3	1	1.66667	1.1547	0.321928
Yer048c	Caj1	0	4	1	1.66667	2.08167	1	3	1	1.66667	1.1547	0
Ykl145w	Rpt1	2	2	2	2	0	1	3	1	1.66667	1.1547	-0.263034
Yjl020c	Bbc1	5	3	5	4.33333	1.1547	1	1	3	1.66667	1.1547	-1.37851
Ykr026c	Gcn3	0	0	0	0	0	1	1	3	1.66667	1.1547
Ydl168w	Sfa1	0	0	1	0.333333	0.57735	2	1	2	1.66667	0.57735	2.32193
Yar002c-a	Erp1	0	1	1	0.666667	0.57735	2	1	2	1.66667	0.57735	1.32193
Ygr020c	Vma7	0	1	1	0.666667	0.57735	1	2	2	1.66667	0.57735	1.32193
Yhr193c	Egd2	1	0	1	0.666667	0.57735	2	2	1	1.66667	0.57735	1.32193
Yjr070c	Lia1	2	0	0	0.666667	1.1547	1	2	2	1.66667	0.57735	1.32193
Yml125c	Pga3	1	0	1	0.666667	0.57735	2	1	2	1.66667	0.57735	1.32193
Ynl096c/Yor096w	Rps7b/Rps7a	1	1	0	0.666667	0.57735	1	2	2	1.66667	0.57735	1.32193
Yer094c	Pup3	1	1	1	1	0	1	2	2	1.66667	0.57735	0.736966
Yfr052w	Rpn12	1	1	1	1	0	1	2	2	1.66667	0.57735	0.736966
Ygr124w/Ypr145w	Asn2/Asn1	1	1	1	1	0	1	2	2	1.66667	0.57735	0.736966
Yhr208w/Yjr148w	Bat1/Bat2	1	0	2	1	1	1	2	2	1.66667	0.57735	0.736966
Yjl052w/Yjr009c	Tdh1/Tdh2	1	1	1	1	0	2	2	1	1.66667	0.57735	0.736966
Yjr117w	Ste24	1	1	1	1	0	2	2	1	1.66667	0.57735	0.736966
Ylr380w	Csr1	1	1	1	1	0	1	2	2	1.66667	0.57735	0.736966
Ynl208w	Ynl208w	1	1	1	1	0	2	2	1	1.66667	0.57735	0.736966
Yol039w	Rpp2a	1	1	1	1	0	1	2	2	1.66667	0.57735	0.736966
Ydl066w/Ylr174w/Ynl009w	Idp1/Idp2/Idp3	1	2	1	1.33333	0.57735	2	1	2	1.66667	0.57735	0.321928
Ydr389w	Sac7	1	2	1	1.33333	0.57735	1	2	2	1.66667	0.57735	0.321928
Yer062c/Yil053w	Gpp2/Gpp1	1	1	2	1.33333	0.57735	2	2	1	1.66667	0.57735	0.321928
Ylr264w/Yor167c	Rps28b/Rps28a	1	1	2	1.33333	0.57735	1	2	2	1.66667	0.57735	0.321928
Ymr260c	Tif11	2	2	0	1.33333	1.1547	1	2	2	1.66667	0.57735	0.321928
Ynl135c	Fpr1	1	1	2	1.33333	0.57735	1	2	2	1.66667	0.57735	0.321928
Yer131w/Ygl189c	Rps26b/Rps26a	2	2	1	1.66667	0.57735	1	2	2	1.66667	0.57735	0
Yhr170w	Nmd3	2	2	1	1.66667	0.57735	1	2	2	1.66667	0.57735	0
Yil108w	Yil108w	2	1	2	1.66667	0.57735	2	2	1	1.66667	0.57735	0
Ylr448w	Rpl6b	2	1	2	1.66667	0.57735	2	1	2	1.66667	0.57735	0
Ygl115w	Snf4	1	2	3	2	1	2	2	1	1.66667	0.57735	-0.263034
Yhl033c	Rpl8a	2	2	2	2	0	1	2	2	1.66667	0.57735	-0.263034
Ylr195c	Nmt1	2	2	2	2	0	2	1	2	1.66667	0.57735	-0.263034
Ynl112w	Dbp2	3	2	1	2	1	1	2	2	1.66667	0.57735	-0.263034
Ybr191w	Rpl21a	3	2	2	2.33333	0.57735	2	2	1	1.66667	0.57735	-0.485427
Ygl120c	Prp43	1	3	3	2.33333	1.1547	1	2	2	1.66667	0.57735	-0.485427
Yml124c	Tub3	2	3	2	2.33333	0.57735	1	2	2	1.66667	0.57735	-0.485427
Ypl190c	Nab3	1	4	2	2.33333	1.52753	1	2	2	1.66667	0.57735	-0.485427
Ydr497c	Itr1	3	3	3	3	0	2	1	2	1.66667	0.57735	-0.847997
Ynr057c	Bio4	3	3	3	3	0	1	2	2	1.66667	0.57735	-0.847997
Ydr172w	Sup35	3	5	6	4.66667	1.52753	2	2	1	1.66667	0.57735	-1.48543
Yal044c	Gcv3	0	0	0	0	0	1	2	2	1.66667	0.57735
Ybr026c	Etr1	0	0	0	0	0	1	2	2	1.66667	0.57735
Ygr087c	Pdc6	0	0	0	0	0	2	1	2	1.66667	0.57735
Yhr200w	Rpn10	0	0	0	0	0	2	1	2	1.66667	0.57735
Yor261c	Rpn8	0	0	0	0	0	1	2	2	1.66667	0.57735
Yjr137c	Met5	1	0	0	0.333333	0.57735	0	1	3	1.33333	1.52753	2
Ygr162w	Tif4631	2	0	1	1	1	1	3	0	1.33333	1.52753	0.415037
Yjl123c	Mtc1	1	2	0	1	1	0	3	1	1.33333	1.52753	0.415037
Ymr229c	Rrp5	0	4	1	1.66667	2.08167	1	0	3	1.33333	1.52753	-0.321928
Ycl057w	Prd1	0	1	0	0.333333	0.57735	0	2	2	1.33333	1.1547	2
Yir037w	Hyr1	0	0	1	0.333333	0.57735	0	2	2	1.33333	1.1547	2
Ylr100w	Erg27	0	0	1	0.333333	0.57735	2	2	0	1.33333	1.1547	2
Yfr010w	Ubp6	1	1	0	0.666667	0.57735	2	0	2	1.33333	1.1547	1
Ypl204w	Hrr25	0	1	1	0.666667	0.57735	0	2	2	1.33333	1.1547	1
Yil022w	Tim44	1	1	1	1	0	0	2	2	1.33333	1.1547	0.415037
Yjr133w	Xpt1	1	1	1	1	0	2	0	2	1.33333	1.1547	0.415037
Yor341w	Rpa190	1	0	2	1	1	0	2	2	1.33333	1.1547	0.415037
Yhr089c	Gar1	2	3	4	3	1	0	2	2	1.33333	1.1547	-1.16993
Ydr099w	Bmh2	5	3	3	3.66667	1.1547	2	2	0	1.33333	1.1547	-1.45943
Ydr483w	Kre2	1	0	0	0.333333	0.57735	2	1	1	1.33333	0.57735	2
Ygr207c	Cir1	0	1	0	0.333333	0.57735	1	1	2	1.33333	0.57735	2
Ymr314w	Pre5	1	0	0	0.333333	0.57735	1	2	1	1.33333	0.57735	2
Yor285w	Rdl1	0	0	1	0.333333	0.57735	1	2	1	1.33333	0.57735	2
Ypl079w	Rpl21b	1	0	0	0.333333	0.57735	2	1	1	1.33333	0.57735	2
Ybl026w	Lsm2	0	1	1	0.666667	0.57735	2	1	1	1.33333	0.57735	1
Ydl075w	Rpl31a	1	0	1	0.666667	0.57735	2	1	1	1.33333	0.57735	1
Ykr046c	Pet10	0	1	1	0.666667	0.57735	1	2	1	1.33333	0.57735	1
Yor260w	Gcd1	1	0	1	0.666667	0.57735	1	1	2	1.33333	0.57735	1
Ydl080c/Ygr087c/Ylr044c/Ylr134w	Thi3/Pdc6/Pdc1/Pdc5	1	1	1	1	0	1	2	1	1.33333	0.57735	0.415037
Ydr012w	Rpl4b	1	1	1	1	0	2	1	1	1.33333	0.57735	0.415037
Ydr170c	Sec7	1	0	2	1	1	1	2	1	1.33333	0.57735	0.415037
Yer009w	Ntf2	1	1	1	1	0	2	1	1	1.33333	0.57735	0.415037
Ymr105c	Pgm2	0	1	2	1	1	1	2	1	1.33333	0.57735	0.415037
Ynl307c	Mck1	0	1	2	1	1	2	1	1	1.33333	0.57735	0.415037
Ypl129w	Taf14	1	1	1	1	0	2	1	1	1.33333	0.57735	0.415037
Ybr031w	Rpl4a	2	1	1	1.33333	0.57735	1	1	2	1.33333	0.57735	0
Ydl147w	Rpn5	1	1	2	1.33333	0.57735	1	1	2	1.33333	0.57735	0
Ydr148c	Kgd2	1	1	2	1.33333	0.57735	1	2	1	1.33333	0.57735	0
Ygr085c/Ypr102c	Rpl11b/Rpl11a	1	2	1	1.33333	0.57735	1	1	2	1.33333	0.57735	0
Ymr261c	Tps3	1	0	3	1.33333	1.52753	2	1	1	1.33333	0.57735	0
Yml074c	Fpr3	1	2	2	1.66667	0.57735	1	1	2	1.33333	0.57735	-0.321928
Yml017w	Psp2	1	2	3	2	1	2	1	1	1.33333	0.57735	-0.584963
Ykl181w	Prs1	2	2	3	2.33333	0.57735	2	1	1	1.33333	0.57735	-0.807355
Yor326w	Myo2	2	2	3	2.33333	0.57735	2	1	1	1.33333	0.57735	-0.807355
Yml073c	Rpl6a	4	3	1	2.66667	1.52753	1	2	1	1.33333	0.57735	-1
Yjl012c	Vtc4	2	3	4	3	1	1	1	2	1.33333	0.57735	-1.16993
Ymr109w	Myo5	2	3	4	3	1	1	2	1	1.33333	0.57735	-1.16993
Ydr381w	Yra1	5	5	4	4.66667	0.57735	1	2	1	1.33333	0.57735	-1.80735
Ylr390w-a	Ccw14	4	5	5	4.66667	0.57735	1	2	1	1.33333	0.57735	-1.80735
Ylr175w	Cbf5	6	7	6	6.33333	0.57735	1	1	2	1.33333	0.57735	-2.24793
Ycl035c	Grx1	0	0	0	0	0	1	1	2	1.33333	0.57735
Ydl137w	Arf2	0	0	0	0	0	1	2	1	1.33333	0.57735
Ydr211w	Gcd6	0	0	0	0	0	2	1	1	1.33333	0.57735
Yel031w	Spf1	0	0	0	0	0	1	2	1	1.33333	0.57735
Yhr001w	Osh7	0	0	0	0	0	1	1	2	1.33333	0.57735
Yjl217w	Ree1	0	0	0	0	0	2	1	1	1.33333	0.57735
Ylr287c-a/Yor182c	Rps30a/Rps30b	0	0	0	0	0	2	1	1	1.33333	0.57735
Yol143c	Rib4	0	0	0	0	0	1	1	2	1.33333	0.57735
Ypl037c	Egd1	0	0	0	0	0	1	2	1	1.33333	0.57735
Ypl260w	Ypl260w	0	0	0	0	0	1	2	1	1.33333	0.57735
Ypl273w	Sam4	0	0	0	0	0	2	1	1	1.33333	0.57735
Ygl221c	Nif3	0	1	1	0.666667	0.57735	0	3	0	1	1.73205	0.584963
Ybr139w	Ybr139w	1	2	1	1.33333	0.57735	0	0	3	1	1.73205	-0.415037
Yal042w	Erv46	0	0	1	0.333333	0.57735	0	1	2	1	1	1.58496
Ybr263w	Shm1	0	0	1	0.333333	0.57735	0	2	1	1	1	1.58496
Yel027w	Vma3	1	0	0	0.333333	0.57735	1	0	2	1	1	1.58496
Yhr021c/Ykl156w	Rps27b/Rps27a	0	1	0	0.333333	0.57735	2	0	1	1	1	1.58496
Yjl173c	Rfa3	0	1	0	0.333333	0.57735	0	1	2	1	1	1.58496
Ylr372w	Elo3	1	0	0	0.333333	0.57735	0	2	1	1	1	1.58496
Ymr237w	Bch1	0	1	0	0.333333	0.57735	1	0	2	1	1	1.58496
Ynl175c	Nop13	0	0	1	0.333333	0.57735	0	2	1	1	1	1.58496
Yol016c	Cmk2	0	1	0	0.333333	0.57735	0	1	2	1	1	1.58496
Ypl091w	Glr1	0	0	1	0.333333	0.57735	2	1	0	1	1	1.58496
Ypr020w	Atp20	0	1	0	0.333333	0.57735	0	2	1	1	1	1.58496
Ydl135c	Rdi1	1	0	1	0.666667	0.57735	2	0	1	1	1	0.584963
Ydl140c	Rpo21	0	1	1	0.666667	0.57735	2	0	1	1	1	0.584963
Ykr018c	Ykr018c	1	0	1	0.666667	0.57735	1	0	2	1	1	0.584963
Yml012w	Erv25	1	0	1	0.666667	0.57735	2	0	1	1	1	0.584963
Ybl050w	Sec17	1	1	1	1	0	0	1	2	1	1	0
Yfl005w	Sec4	1	0	2	1	1	2	1	0	1	1	0
Ykl164c	Pir1	1	1	1	1	0	0	1	2	1	1	0
Yol038w	Pre6	0	2	1	1	1	0	1	2	1	1	0
Yor065w	Cyt1	1	1	1	1	0	0	1	2	1	1	0
Ypr010c	Rpa135	0	1	2	1	1	0	2	1	1	1	0
Ycr004c	Ycp4	1	1	2	1.33333	0.57735	0	2	1	1	1	-0.415037
Ydr457w	Tom1	0	2	2	1.33333	1.1547	1	2	0	1	1	-0.415037
Yfr053c/Ygl253w	Hxk1/Hxk2	1	1	2	1.33333	0.57735	0	2	1	1	1	-0.415037
Ygl011c	Scl1	1	1	2	1.33333	0.57735	0	2	1	1	1	-0.415037
Ylr441c	Rps1a	0	1	3	1.33333	1.52753	2	0	1	1	1	-0.415037
Yor362c	Pre10	1	2	2	1.66667	0.57735	0	2	1	1	1	-0.736966
Yor086c	Tcb1	1	3	2	2	1	0	2	1	1	1	-1
Ypr088c	Srp54	1	2	4	2.33333	1.52753	0	1	2	1	1	-1.22239
Ybr078w	Ecm33	4	4	3	3.66667	0.57735	0	2	1	1	1	-1.87447
Yfr009w	Gcn20	2	5	4	3.66667	1.52753	0	2	1	1	1	-1.87447
Ydl040c	Nat1	0	0	0	0	0	0	2	1	1	1
Ydr087c	Rrp1	0	0	0	0	0	2	0	1	1	1
Ydr135c	Ycf1	0	0	0	0	0	0	2	1	1	1
Yel051w	Vma8	0	0	0	0	0	0	1	2	1	1
Yel058w	Pcm1	0	0	0	0	0	0	1	2	1	1
Ygl238w	Cse1	0	0	0	0	0	0	1	2	1	1
Yhr074w	Qns1	0	0	0	0	0	0	2	1	1	1
Yhr128w	Fur1	0	0	0	0	0	2	1	0	1	1
Ykl001c	Met14	0	0	0	0	0	1	2	0	1	1
Yll029w	Fra1	0	0	0	0	0	0	1	2	1	1
Ylr429w	Crn1	0	0	0	0	0	0	1	2	1	1
Ymr092c	Aip1	0	0	0	0	0	2	0	1	1	1
Ynl154c	Yck2	0	0	0	0	0	0	2	1	1	1
Ynl229c	Ure2	0	0	0	0	0	0	2	1	1	1
Ynl244c	Sui1	0	0	0	0	0	1	0	2	1	1
Ynl274c	Gor1	0	0	0	0	0	2	1	0	1	1
Ypl111w	Car1	0	0	0	0	0	2	1	0	1	1
Ypr062w	Fcy1	0	0	0	0	0	0	2	1	1	1
Yal029c/Yor326w	Myo4/Myo2	0	0	1	0.333333	0.57735	1	1	1	1	0	1.58496
Ybl041w	Pre7	0	0	1	0.333333	0.57735	1	1	1	1	0	1.58496
Ybr111c	Ysa1	0	1	0	0.333333	0.57735	1	1	1	1	0	1.58496
Ybr207w	Fth1	1	0	0	0.333333	0.57735	1	1	1	1	0	1.58496
Ydl130w	Rpp1b	1	0	0	0.333333	0.57735	1	1	1	1	0	1.58496
Ydl171c	Glt1	0	0	1	0.333333	0.57735	1	1	1	1	0	1.58496
Ydr299w	Bfr2	0	1	0	0.333333	0.57735	1	1	1	1	0	1.58496
Ygl054c	Erv14	1	0	0	0.333333	0.57735	1	1	1	1	0	1.58496
Ykl024c	Ura6	0	0	1	0.333333	0.57735	1	1	1	1	0	1.58496
Ylr044c/Ylr134w	Pdc1/Pdc5	0	0	1	0.333333	0.57735	1	1	1	1	0	1.58496
Ylr344w	Rpl26a	1	0	0	0.333333	0.57735	1	1	1	1	0	1.58496
Ylr370c	Arc18	0	0	1	0.333333	0.57735	1	1	1	1	0	1.58496
Ylr378c	Sec61	1	0	0	0.333333	0.57735	1	1	1	1	0	1.58496
Yml131w	Yml131w	0	0	1	0.333333	0.57735	1	1	1	1	0	1.58496
Ymr290c	Has1	0	0	1	0.333333	0.57735	1	1	1	1	0	1.58496
Ypl050c	Mnn9	0	1	0	0.333333	0.57735	1	1	1	1	0	1.58496
Ypr108w	Rpn7	1	0	0	0.333333	0.57735	1	1	1	1	0	1.58496
Ypr133c	Spn1	1	0	0	0.333333	0.57735	1	1	1	1	0	1.58496
Q0085	Atp6	0	1	1	0.666667	0.57735	1	1	1	1	0	0.584963
Ybr222c	Pcs60	1	0	1	0.666667	0.57735	1	1	1	1	0	0.584963
Yfr033c	Qcr6	0	1	1	0.666667	0.57735	1	1	1	1	0	0.584963
Yil062c	Arc15	1	0	1	0.666667	0.57735	1	1	1	1	0	0.584963
Ykr014c	Ypt52	0	1	1	0.666667	0.57735	1	1	1	1	0	0.584963
Ylr133w	Cki1	0	1	1	0.666667	0.57735	1	1	1	1	0	0.584963
Q0045	Cox1	1	1	1	1	0	1	1	1	1	0	0
Yal054c/Ylr153c	Acs1/Acs2	1	1	1	1	0	1	1	1	1	0	0
Yal060w	Bdh1	0	1	2	1	1	1	1	1	1	0	0
Yar073w/Yhr216w/Ylr432w	Imd1/Imd2/Imd3	1	1	1	1	0	1	1	1	1	0	0
Ybl056w	Ptc3	1	1	1	1	0	1	1	1	1	0	0
Ybr086c	Ist2	1	1	1	1	0	1	1	1	1	0	0
Ybr283c	Ssh1	2	1	0	1	1	1	1	1	1	0	0
Ydr174w	Hmo1	0	1	2	1	1	1	1	1	1	0	0
Ydr175c	Rsm24	1	1	1	1	0	1	1	1	1	0	0
Ydr429c	Tif35	1	0	2	1	1	1	1	1	1	0	0
Yer006w	Nug1	1	1	1	1	0	1	1	1	1	0	0
Yer007c-a	Tma20	0	2	1	1	1	1	1	1	1	0	0
Yfr024c-a	Lsb3	1	1	1	1	0	1	1	1	1	0	0
Ygl076c	Rpl7a	1	1	1	1	0	1	1	1	1	0	0
Ygr086c/Ypl004c	Pil1/Lsp1	1	1	1	1	0	1	1	1	1	0	0
Ygr193c	Pdx1	1	1	1	1	0	1	1	1	1	0	0
Yhl001w	Rpl14b	1	1	1	1	0	1	1	1	1	0	0
Yil155c	Gut2	2	1	0	1	1	1	1	1	1	0	0
Yjr010w	Met3	1	1	1	1	0	1	1	1	1	0	0
Ylr061w	Rpl22a	1	1	1	1	0	1	1	1	1	0	0
Ynl112w/Yor204w/Ypl119c	Dbp2/Ded1/Dbp1	1	1	1	1	0	1	1	1	1	0	0
Yol055c/Ypl258c	Thi20/Thi21	0	1	2	1	1	1	1	1	1	0	0
Yor061w	Cka2	1	1	1	1	0	1	1	1	1	0	0
Ypl127c	Hho1	2	0	1	1	1	1	1	1	1	0	0
Ypl143w	Rpl33a	1	1	1	1	0	1	1	1	1	0	0
R0040c	Rep2	2	1	1	1.33333	0.57735	1	1	1	1	0	-0.415037
Ygr116w	Spt6	1	2	1	1.33333	0.57735	1	1	1	1	0	-0.415037
Yjr008w	Mho1	1	1	2	1.33333	0.57735	1	1	1	1	0	-0.415037
Ynl243w	Sla2	1	2	2	1.66667	0.57735	1	1	1	1	0	-0.736966
Ypl249c-a	Rpl36b	1	2	2	1.66667	0.57735	1	1	1	1	0	-0.736966
Ypr163c	Tif3	1	3	1	1.66667	1.1547	1	1	1	1	0	-0.736966
Ycr005c	Cit2	2	2	2	2	0	1	1	1	1	0	-1
Yer080w	Aim9	0	3	3	2	1.73205	1	1	1	1	0	-1
Ykl122c	Srp21	3	1	2	2	1	1	1	1	1	0	-1
Ynl209w	Ssb2	2	2	2	2	0	1	1	1	1	0	-1
Yml010w	Spt5	1	3	3	2.33333	1.1547	1	1	1	1	0	-1.22239
Ymr250w	Gad1	2	3	2	2.33333	0.57735	1	1	1	1	0	-1.22239
Ynl200c	Ynl200c	1	4	2	2.33333	1.52753	1	1	1	1	0	-1.22239
Ykl081w/Ypl048w	Tef4/Cam1	3	2	3	2.66667	0.57735	1	1	1	1	0	-1.41504
Yml072c	Tcb3	2	3	5	3.33333	1.52753	1	1	1	1	0	-1.73697
Ylr258w	Gsy2	7	7	7	7	0	1	1	1	1	0	-2.80735
Ybr286w	Ape3	0	0	0	0	0	1	1	1	1	0
Ycl026c-b	Hbn1	0	0	0	0	0	1	1	1	1	0
Ydr002w	Yrb1	0	0	0	0	0	1	1	1	1	0
Yer107c	Gle2	0	0	0	0	0	1	1	1	1	0
Yfr002w	Nic96	0	0	0	0	0	1	1	1	1	0
Yfr004w	Rpn11	0	0	0	0	0	1	1	1	1	0
Ygr032w/Ylr342w	Gsc2/Fks1	0	0	0	0	0	1	1	1	1	0
Ygr232w	Nas6	0	0	0	0	0	1	1	1	1	0
Yhr043c/Yhr044c	Dog2/Dog1	0	0	0	0	0	1	1	1	1	0
Yhr135c	Yck1	0	0	0	0	0	1	1	1	1	0
Yil051c	Mmf1	0	0	0	0	0	1	1	1	1	0
Ykl127w	Pgm1	0	0	0	0	0	1	1	1	1	0
Ykl128c	Pmu1	0	0	0	0	0	1	1	1	1	0
Ylr089c	Alt1	0	0	0	0	0	1	1	1	1	0
Ymr287c	Dss1	0	0	0	0	0	1	1	1	1	0
Ynl164c	Ibd2	0	0	0	0	0	1	1	1	1	0
Yor224c	Rpb8	0	0	0	0	0	1	1	1	1	0
Yor234c	Rpl33b	0	0	0	0	0	1	1	1	1	0
Ypl139c	Ume1	0	0	0	0	0	1	1	1	1	0
Ypl212c	Pus1	0	0	0	0	0	1	1	1	1	0
Yjr068w	Rfc2	1	0	0	0.333333	0.57735	0	0	2	0.666667	1.1547	1
Ygr034w	Rpl26b	1	0	1	0.666667	0.57735	0	0	2	0.666667	1.1547	0
Ycr028c-a	Rim1	1	1	1	1	0	0	0	2	0.666667	1.1547	-0.584963
Ynr021w	Ynr021w	1	1	1	1	0	0	0	2	0.666667	1.1547	-0.584963
Yml063w	Rps1b	2	2	2	2	0	0	0	2	0.666667	1.1547	-1.58496
Yor173w	Dcs2	2	1	5	2.66667	2.08167	0	2	0	0.666667	1.1547	-2
Ydr477w	Snf1	2	3	4	3	1	0	0	2	0.666667	1.1547	-2.16993
Yol030w	Gas5	3	3	5	3.66667	1.1547	0	0	2	0.666667	1.1547	-2.45943
Ydl125c	Hnt1	0	0	0	0	0	0	0	2	0.666667	1.1547
Ydr177w	Ubc1	0	0	0	0	0	0	0	2	0.666667	1.1547
Ykl010c	Ufd4	0	0	0	0	0	0	2	0	0.666667	1.1547
Ylr003c	Cms1	0	0	0	0	0	0	0	2	0.666667	1.1547
Yml120c	Ndi1	0	0	0	0	0	0	0	2	0.666667	1.1547
Ymr169c/Ymr170c	Ald3/Ald2	0	0	0	0	0	0	0	2	0.666667	1.1547
Ypr127w	Ypr127w	0	0	0	0	0	0	2	0	0.666667	1.1547
Yar010c/Ybr012w-a/Ydr210c-c/Ydr261c-c/Ydr316w-a/Yer159c-a/Ygr161c-c/Yhr214c-c/Yjr028w/Yml045w-a/Ymr051c/Ynl054w-a/Yor142w-a/Ypr137c-a/Ypr158w-a		0	0	1	0.333333	0.57735	0	1	1	0.666667	0.57735	1
Ydl019c	Osh2	0	0	1	0.333333	0.57735	0	1	1	0.666667	0.57735	1
Ydl188c	Pph22	0	0	1	0.333333	0.57735	1	0	1	0.666667	0.57735	1
Ydr098c	Grx3	0	1	0	0.333333	0.57735	0	1	1	0.666667	0.57735	1
Ydr098c-a/Ydr170w-a/Ydr365w-a/Yer137c-a/Ygr027w-a/Ygr038c-a/Yjr026w/Ylr157c-a/Ylr227w-a/Ylr256w-a/Yml040w/Ynl284c-a/Yol103w-a/Ypl257w-a/Ypr158c-c		1	0	0	0.333333	0.57735	0	1	1	0.666667	0.57735	1
Ydr255c	Rmd5	0	1	0	0.333333	0.57735	0	1	1	0.666667	0.57735	1
Ydr346c	Svf1	0	0	1	0.333333	0.57735	1	0	1	0.666667	0.57735	1
Ydr368w/Yor120w	Ypr1/Gcy1	0	1	0	0.333333	0.57735	0	1	1	0.666667	0.57735	1
Ygl191w	Cox13	0	0	1	0.333333	0.57735	1	0	1	0.666667	0.57735	1
Ygr043c	Nqm1	0	1	0	0.333333	0.57735	1	0	1	0.666667	0.57735	1
Ygr284c	Erv29	0	0	1	0.333333	0.57735	0	1	1	0.666667	0.57735	1
Yhr141c/Ynl162w	Rpl42b/Rpl42a	0	0	1	0.333333	0.57735	1	0	1	0.666667	0.57735	1
Yjl050w	Mtr4	0	1	0	0.333333	0.57735	0	1	1	0.666667	0.57735	1
Yjl189w	Rpl39	0	0	1	0.333333	0.57735	0	1	1	0.666667	0.57735	1
Ykl127w/Ymr105c	Pgm1/Pgm2	0	1	0	0.333333	0.57735	1	1	0	0.666667	0.57735	1
Yll013c	Puf3	0	1	0	0.333333	0.57735	1	1	0	0.666667	0.57735	1
Ylr192c	Hcr1	0	1	0	0.333333	0.57735	1	0	1	0.666667	0.57735	1
Ylr406c	Rpl31b	1	0	0	0.333333	0.57735	0	1	1	0.666667	0.57735	1
Ymr047c	Nup116	0	1	0	0.333333	0.57735	0	1	1	0.666667	0.57735	1
Ymr243c	Zrc1	0	0	1	0.333333	0.57735	0	1	1	0.666667	0.57735	1
Ynl084c	End3	0	0	1	0.333333	0.57735	0	1	1	0.666667	0.57735	1
Ynl118c	Dcp2	1	0	0	0.333333	0.57735	0	1	1	0.666667	0.57735	1
Yol027c	Mdm38	0	1	0	0.333333	0.57735	1	1	0	0.666667	0.57735	1
Yor057w	Sgt1	1	0	0	0.333333	0.57735	0	1	1	0.666667	0.57735	1
Yor254c	Sec63	1	0	0	0.333333	0.57735	0	1	1	0.666667	0.57735	1
Ypr028w	Yop1	1	0	0	0.333333	0.57735	0	1	1	0.666667	0.57735	1
Yar073w/Yhr216w/Ylr432w/Yml056c	Imd1/Imd2/Imd3/Imd4	1	1	0	0.666667	0.57735	1	0	1	0.666667	0.57735	0
Ybl030c/Ybr085w/Ymr056c	Pet9/Aac3/Aac1	1	0	1	0.666667	0.57735	1	0	1	0.666667	0.57735	0
Ybl039c/Yjr103w	Ura7/Ura8	0	1	1	0.666667	0.57735	0	1	1	0.666667	0.57735	0
Ybr085w	Aac3	0	0	2	0.666667	1.1547	1	1	0	0.666667	0.57735	0
Ybr164c	Arl1	0	1	1	0.666667	0.57735	0	1	1	0.666667	0.57735	0
Ybr189w	Rps9b	0	1	1	0.666667	0.57735	0	1	1	0.666667	0.57735	0
Ydr358w	Gga1	1	1	0	0.666667	0.57735	1	0	1	0.666667	0.57735	0
Yer057c	Hmf1	1	1	0	0.666667	0.57735	0	1	1	0.666667	0.57735	0
Ygl062w	Pyc1	0	1	1	0.666667	0.57735	0	1	1	0.666667	0.57735	0
Ygl087c	Mms2	0	1	1	0.666667	0.57735	0	1	1	0.666667	0.57735	0
Ylr017w	Meu1	0	1	1	0.666667	0.57735	1	1	0	0.666667	0.57735	0
Ylr330w	Chs5	1	1	0	0.666667	0.57735	0	1	1	0.666667	0.57735	0
Ylr421c	Rpn13	0	1	1	0.666667	0.57735	0	1	1	0.666667	0.57735	0
Yml092c	Pre8	1	1	0	0.666667	0.57735	1	1	0	0.666667	0.57735	0
Ymr149w	Swp1	1	1	0	0.666667	0.57735	0	1	1	0.666667	0.57735	0
Ynl016w	Pub1	1	1	0	0.666667	0.57735	1	1	0	0.666667	0.57735	0
Yor151c	Rpb2	0	0	2	0.666667	1.1547	1	0	1	0.666667	0.57735	0
Yor197w	Mca1	0	1	1	0.666667	0.57735	0	1	1	0.666667	0.57735	0
Yor204w/Ypl119c	Ded1/Dbp1	1	0	1	0.666667	0.57735	1	0	1	0.666667	0.57735	0
Yor271c	Fsf1	1	1	0	0.666667	0.57735	0	1	1	0.666667	0.57735	0
Ypl271w	Atp15	1	1	0	0.666667	0.57735	0	1	1	0.666667	0.57735	0
Yal005c/Yer103w/Yjl034w/Yll024c	Ssa1/Ssa4/Kar2/Ssa2	1	2	0	1	1	1	0	1	0.666667	0.57735	-0.584963
Ybr054w	Yro2	1	0	2	1	1	0	1	1	0.666667	0.57735	-0.584963
Ybr082c/Ydr059c	Ubc4/Ubc5	2	0	1	1	1	1	0	1	0.666667	0.57735	-0.584963
Ycr030c	Syp1	1	1	1	1	0	0	1	1	0.666667	0.57735	-0.584963
Yhl011c	Prs3	1	1	1	1	0	0	1	1	0.666667	0.57735	-0.584963
Yjl177w	Rpl17b	1	1	1	1	0	1	0	1	0.666667	0.57735	-0.584963
Yjr154w	Yjr154w	0	2	1	1	1	1	1	0	0.666667	0.57735	-0.584963
Ykl006w	Rpl14a	1	1	1	1	0	0	1	1	0.666667	0.57735	-0.584963
Ykl193c	Sds22	1	0	2	1	1	1	1	0	0.666667	0.57735	-0.584963
Ynr017w	Tim23	1	1	1	1	0	0	1	1	0.666667	0.57735	-0.584963
Yer073w/Yor374w	Ald5/Ald4	2	1	1	1.33333	0.57735	1	1	0	0.666667	0.57735	-1
Yfr030w	Met10	0	3	1	1.33333	1.52753	1	1	0	0.666667	0.57735	-1
Ygl121c	Gpg1	1	1	2	1.33333	0.57735	0	1	1	0.666667	0.57735	-1
Yhr135c/Ynl154c	Yck1/Yck2	2	0	2	1.33333	1.1547	0	1	1	0.666667	0.57735	-1
Ykl016c	Atp7	1	2	1	1.33333	0.57735	0	1	1	0.666667	0.57735	-1
Ylr229c	Cdc42	2	0	2	1.33333	1.1547	1	1	0	0.666667	0.57735	-1
Yml057w	Cmp2	0	2	2	1.33333	1.1547	0	1	1	0.666667	0.57735	-1
Ynl014w	Hef3	1	1	2	1.33333	0.57735	0	1	1	0.666667	0.57735	-1
Ypl063w	Tim50	1	0	3	1.33333	1.52753	0	1	1	0.666667	0.57735	-1
Ymr131c	Rrb1	1	3	1	1.66667	1.1547	1	1	0	0.666667	0.57735	-1.32193
Ycl011c	Gbp2	2	2	2	2	0	0	1	1	0.666667	0.57735	-1.58496
Ydl229w	Ssb1	2	2	2	2	0	1	0	1	0.666667	0.57735	-1.58496
Ygl019w	Ckb1	2	2	2	2	0	1	0	1	0.666667	0.57735	-1.58496
Ykl065c	Yet1	2	2	2	2	0	1	1	0	0.666667	0.57735	-1.58496
Yhl034c	Sbp1	2	5	3	3.33333	1.52753	1	1	0	0.666667	0.57735	-2.32193
Yml069w	Pob3	3	4	4	3.66667	0.57735	0	1	1	0.666667	0.57735	-2.45943
Yal007c/Yor016c	Erp2/Erp4	0	0	0	0	0	1	1	0	0.666667	0.57735
Ybl034c	Stu1	0	0	0	0	0	0	1	1	0.666667	0.57735
Ybr112c	Cyc8	0	0	0	0	0	1	1	0	0.666667	0.57735
Ybr245c/Yor304w	Isw1/Isw2	0	0	0	0	0	1	0	1	0.666667	0.57735
Ybr249c/Ydr035w	Aro4/Aro3	0	0	0	0	0	0	1	1	0.666667	0.57735
Ycr017c	Cwh43	0	0	0	0	0	0	1	1	0.666667	0.57735
Ydl051w	Lhp1	0	0	0	0	0	0	1	1	0.666667	0.57735
Ydl103c	Qri1	0	0	0	0	0	1	1	0	0.666667	0.57735
Ydl128w	Vcx1	0	0	0	0	0	1	0	1	0.666667	0.57735
Ydl154w	Msh5	0	0	0	0	0	0	1	1	0.666667	0.57735
Ydl219w	Dtd1	0	0	0	0	0	0	1	1	0.666667	0.57735
Ydl226c	Gcs1	0	0	0	0	0	0	1	1	0.666667	0.57735
Ydr086c	Sss1	0	0	0	0	0	1	0	1	0.666667	0.57735
Ydr101c	Arx1	0	0	0	0	0	1	1	0	0.666667	0.57735
Ydr232w	Hem1	0	0	0	0	0	1	1	0	0.666667	0.57735
Ydr240c	Snu56	0	0	0	0	0	0	1	1	0.666667	0.57735
Ydr304c	Cpr5	0	0	0	0	0	1	1	0	0.666667	0.57735
Ydr353w/Yhr106w	Trr1/Trr2	0	0	0	0	0	0	1	1	0.666667	0.57735
Ydr394w/Yor259c	Rpt3/Rpt4	0	0	0	0	0	1	1	0	0.666667	0.57735
Ydr436w/Yml016c	Ppz2/Ppz1	0	0	0	0	0	1	1	0	0.666667	0.57735
Ydr496c	Puf6	0	0	0	0	0	0	1	1	0.666667	0.57735
Ydr500c	Rpl37b	0	0	0	0	0	0	1	1	0.666667	0.57735
Yer004w	Fmp52	0	0	0	0	0	1	0	1	0.666667	0.57735
Yer016w	Bim1	0	0	0	0	0	0	1	1	0.666667	0.57735
Yer019c-a	Sbh2	0	0	0	0	0	0	1	1	0.666667	0.57735
Yer067w	Rgi1	0	0	0	0	0	0	1	1	0.666667	0.57735
Yfl044c	Otu1	0	0	0	0	0	1	1	0	0.666667	0.57735
Ygl039w	Ygl039w	0	0	0	0	0	1	1	0	0.666667	0.57735
Ygl231c	Emc4	0	0	0	0	0	0	1	1	0.666667	0.57735
Ygl232w	Tan1	0	0	0	0	0	1	0	1	0.666667	0.57735
Ygr231c	Phb2	0	0	0	0	0	1	1	0	0.666667	0.57735
Ygr244c	Lsc2	0	0	0	0	0	1	0	1	0.666667	0.57735
Yhr008c	Sod2	0	0	0	0	0	0	1	1	0.666667	0.57735
Yhr065c	Rrp3	0	0	0	0	0	1	0	1	0.666667	0.57735
Yjl068c	Yjl068c	0	0	0	0	0	0	1	1	0.666667	0.57735
Yjl088w	Arg3	0	0	0	0	0	0	1	1	0.666667	0.57735
Yjr072c	Npa3	0	0	0	0	0	0	1	1	0.666667	0.57735
Yjr076c	Cdc11	0	0	0	0	0	1	1	0	0.666667	0.57735
Ykl094w	Yju3	0	0	0	0	0	1	0	1	0.666667	0.57735
Ykl103c	Ape1	0	0	0	0	0	0	1	1	0.666667	0.57735
Ykl110c	Kti12	0	0	0	0	0	0	1	1	0.666667	0.57735
Ykl117w	Sba1	0	0	0	0	0	0	1	1	0.666667	0.57735
Ykl126w	Ypk1	0	0	0	0	0	0	1	1	0.666667	0.57735
Ykl126w/Ymr104c	Ypk1/Ypk2	0	0	0	0	0	1	1	0	0.666667	0.57735
Ykl159c	Rcn1	0	0	0	0	0	1	1	0	0.666667	0.57735
Ylr118c	Ylr118c	0	0	0	0	0	1	0	1	0.666667	0.57735
Ylr185w	Rpl37a	0	0	0	0	0	0	1	1	0.666667	0.57735
Ylr449w/Yml074c	Fpr4/Fpr3	0	0	0	0	0	1	0	1	0.666667	0.57735
Yml004c	Glo1	0	0	0	0	0	0	1	1	0.666667	0.57735
Yml105c	Sec65	0	0	0	0	0	0	1	1	0.666667	0.57735
Yml110c	Coq5	0	0	0	0	0	0	1	1	0.666667	0.57735
Ymr058w	Fet3	0	0	0	0	0	1	0	1	0.666667	0.57735
Ymr170c	Ald2	0	0	0	0	0	1	1	0	0.666667	0.57735
Ynl168c	Fmp41	0	0	0	0	0	0	1	1	0.666667	0.57735
Ynl216w	Rap1	0	0	0	0	0	0	1	1	0.666667	0.57735
Ynl256w	Fol1	0	0	0	0	0	0	1	1	0.666667	0.57735
Ynr019w	Are2	0	0	0	0	0	0	1	1	0.666667	0.57735
Yol061w	Prs5	0	0	0	0	0	0	1	1	0.666667	0.57735
Yor020c	Hsp10	0	0	0	0	0	0	1	1	0.666667	0.57735
Yor321w	Pmt3	0	0	0	0	0	0	1	1	0.666667	0.57735
Yor327c	Snc2	0	0	0	0	0	0	1	1	0.666667	0.57735
Ypl012w	Rrp12	0	0	0	0	0	0	1	1	0.666667	0.57735
Ypr058w	Ymc1	0	0	0	0	0	0	1	1	0.666667	0.57735
Ybl007c	Sla1	1	0	0	0.333333	0.57735	0	1	0	0.333333	0.57735	0
Ybr208c	Dur1,2	0	1	0	0.333333	0.57735	1	0	0	0.333333	0.57735	0
Ycl018w	Leu2	0	1	0	0.333333	0.57735	1	0	0	0.333333	0.57735	0
Ydr092w	Ubc13	0	1	0	0.333333	0.57735	0	1	0	0.333333	0.57735	0
Ydr234w	Lys4	1	0	0	0.333333	0.57735	0	0	1	0.333333	0.57735	0
Ygl200c	Emp24	0	0	1	0.333333	0.57735	0	1	0	0.333333	0.57735	0
Yhl030w	Ecm29	0	0	1	0.333333	0.57735	0	0	1	0.333333	0.57735	0
Yhr099w	Tra1	0	0	1	0.333333	0.57735	0	1	0	0.333333	0.57735	0
Yhr132c	Ecm14	1	0	0	0.333333	0.57735	0	0	1	0.333333	0.57735	0
Yjr103w	Ura8	0	0	1	0.333333	0.57735	0	0	1	0.333333	0.57735	0
Ykl029c	Mae1	0	1	0	0.333333	0.57735	0	0	1	0.333333	0.57735	0
Ykl073w	Lhs1	0	0	1	0.333333	0.57735	1	0	0	0.333333	0.57735	0
Ynl015w	Pbi2	0	1	0	0.333333	0.57735	0	1	0	0.333333	0.57735	0
Ynl021w	Hda1	0	0	1	0.333333	0.57735	0	0	1	0.333333	0.57735	0
Ynl231c	Pdr16	0	0	1	0.333333	0.57735	0	0	1	0.333333	0.57735	0
Ynr058w	Bio3	0	0	1	0.333333	0.57735	0	0	1	0.333333	0.57735	0
Ypl009c	Rqc2	0	0	1	0.333333	0.57735	1	0	0	0.333333	0.57735	0
Ypl032c	Svl3	0	1	0	0.333333	0.57735	1	0	0	0.333333	0.57735	0
Ypl188w	Pos5	0	0	1	0.333333	0.57735	1	0	0	0.333333	0.57735	0
Ypr063c	Ypr063c	0	0	1	0.333333	0.57735	0	0	1	0.333333	0.57735	0
Ypr125w	Ylh47	0	0	1	0.333333	0.57735	0	1	0	0.333333	0.57735	0
Ypr148c	Ypr148c	0	1	0	0.333333	0.57735	1	0	0	0.333333	0.57735	0
Ybl022c	Pim1	1	0	1	0.666667	0.57735	1	0	0	0.333333	0.57735	-1
Ybr006w	Uga2	0	1	1	0.666667	0.57735	1	0	0	0.333333	0.57735	-1
Ydl237w	Aim6	0	1	1	0.666667	0.57735	1	0	0	0.333333	0.57735	-1
Ygl031c	Rpl24a	0	0	2	0.666667	1.1547	0	0	1	0.333333	0.57735	-1
Ygl125w	Met13	1	1	0	0.666667	0.57735	0	1	0	0.333333	0.57735	-1
Ygl246c	Rai1	0	1	1	0.666667	0.57735	0	0	1	0.333333	0.57735	-1
Yhr216w/Ylr432w/Yml056c	Imd2/Imd3/Imd4	1	1	0	0.666667	0.57735	0	1	0	0.333333	0.57735	-1
Yjl171c	Toh1	0	1	1	0.666667	0.57735	1	0	0	0.333333	0.57735	-1
Yjr059w	Ptk2	1	1	0	0.666667	0.57735	0	0	1	0.333333	0.57735	-1
Ykl059c	Mpe1	0	1	1	0.666667	0.57735	0	1	0	0.333333	0.57735	-1
Ynl132w	Kre33	1	1	0	0.666667	0.57735	0	1	0	0.333333	0.57735	-1
Ynl290w	Rfc3	1	0	1	0.666667	0.57735	1	0	0	0.333333	0.57735	-1
Ypl110c	Gde1	0	1	1	0.666667	0.57735	0	1	0	0.333333	0.57735	-1
Ypl198w	Rpl7b	0	1	1	0.666667	0.57735	1	0	0	0.333333	0.57735	-1
Ybr154c	Rpb5	1	0	2	1	1	1	0	0	0.333333	0.57735	-1.58496
Yel030w	Ecm10	1	1	1	1	0	0	1	0	0.333333	0.57735	-1.58496
Yer155c	Bem2	0	0	3	1	1.73205	0	1	0	0.333333	0.57735	-1.58496
Ygl078c	Dbp3	1	1	1	1	0	0	1	0	0.333333	0.57735	-1.58496
Ygl147c	Rpl9a	1	1	1	1	0	1	0	0	0.333333	0.57735	-1.58496
Ygr173w	Rbg2	1	1	1	1	0	0	1	0	0.333333	0.57735	-1.58496
Yil133c/Ynl069c	Rpl16a/Rpl16b	0	2	1	1	1	1	0	0	0.333333	0.57735	-1.58496
Ylr206w	Ent2	1	1	1	1	0	0	1	0	0.333333	0.57735	-1.58496
Ylr286c	Cts1	1	1	1	1	0	0	1	0	0.333333	0.57735	-1.58496
Ylr384c	Iki3	1	1	1	1	0	0	0	1	0.333333	0.57735	-1.58496
Ymr183c/Ypl232w	Sso2/Sso1	1	1	1	1	0	0	1	0	0.333333	0.57735	-1.58496
Ymr214w	Scj1	1	1	1	1	0	0	0	1	0.333333	0.57735	-1.58496
Ynl327w	Egt2	1	1	1	1	0	0	1	0	0.333333	0.57735	-1.58496
Yor131c	Yor131c	0	1	2	1	1	0	0	1	0.333333	0.57735	-1.58496
Ybl030c/Ybr085w	Pet9/Aac3	1	2	1	1.33333	0.57735	1	0	0	0.333333	0.57735	-2
Yjl158c/Yjl159w/Yjl160c/Ykl163w/Ykl164c	Cis3/Hsp150/Pir5/Pir3/Pir1	2	0	2	1.33333	1.1547	0	0	1	0.333333	0.57735	-2
Ygl056c	Sds23	1	3	1	1.66667	1.1547	1	0	0	0.333333	0.57735	-2.32193
Yil033c	Bcy1	1	2	2	1.66667	0.57735	0	0	1	0.333333	0.57735	-2.32193
Yjr025c	Bna1	1	2	2	1.66667	0.57735	0	0	1	0.333333	0.57735	-2.32193
Ymr305c	Scw10	1	1	3	1.66667	1.1547	0	1	0	0.333333	0.57735	-2.32193
Yol111c	Mdy2	2	2	1	1.66667	0.57735	1	0	0	0.333333	0.57735	-2.32193
Ypl243w	Srp68	2	1	2	1.66667	0.57735	1	0	0	0.333333	0.57735	-2.32193
Ypr149w	Nce102	1	2	2	1.66667	0.57735	0	1	0	0.333333	0.57735	-2.32193
Yor234c/Ypl143w	Rpl33b/Rpl33a	2	2	2	2	0	1	0	0	0.333333	0.57735	-2.58496
Ybr001c/Ydr001c	Nth2/Nth1	2	3	2	2.33333	0.57735	0	1	0	0.333333	0.57735	-2.80735
Ybr214w	Sds24	2	2	3	2.33333	0.57735	0	0	1	0.333333	0.57735	-2.80735
Yil121w	Qdr2	2	3	3	2.66667	0.57735	0	1	0	0.333333	0.57735	-3
Ylr314c	Cdc3	2	2	4	2.66667	1.1547	1	0	0	0.333333	0.57735	-3
Yir038c	Gtt1	4	4	3	3.66667	0.57735	0	0	1	0.333333	0.57735	-3.45943
Ykl096w	Cwp1	5	3	3	3.66667	1.1547	1	0	0	0.333333	0.57735	-3.45943
Q0140	Var1	0	0	0	0	0	0	0	1	0.333333	0.57735
Yal032c	Prp45	0	0	0	0	0	1	0	0	0.333333	0.57735
Yal049c	Aim2	0	0	0	0	0	0	1	0	0.333333	0.57735
Yar007c	Rfa1	0	0	0	0	0	0	0	1	0.333333	0.57735
Yar042w	Swh1	0	0	0	0	0	1	0	0	0.333333	0.57735
Ybl003c/Ydr225w/Yol012c	Hta2/Hta1/Htz1	0	0	0	0	0	1	0	0	0.333333	0.57735
Ybl017c	Pep1	0	0	0	0	0	0	1	0	0.333333	0.57735
Ybl033c	Rib1	0	0	0	0	0	1	0	0	0.333333	0.57735
Ybl036c	Ybl036c	0	0	0	0	0	0	0	1	0.333333	0.57735
Ybl068w/Yhl011c	Prs4/Prs3	0	0	0	0	0	1	0	0	0.333333	0.57735
Ybl098w	Bna4	0	0	0	0	0	0	0	1	0.333333	0.57735
Ybr029c	Cds1	0	0	0	0	0	0	0	1	0.333333	0.57735
Ybr052c	Rfs1	0	0	0	0	0	0	1	0	0.333333	0.57735
Ybr087w	Rfc5	0	0	0	0	0	0	1	0	0.333333	0.57735
Ybr145w	Adh5	0	0	0	0	0	0	0	1	0.333333	0.57735
Ybr160w/Ypl031c	Cdc28/Pho85	0	0	0	0	0	0	1	0	0.333333	0.57735
Ybr198c	Taf5	0	0	0	0	0	0	1	0	0.333333	0.57735
Ybr237w	Prp5	0	0	0	0	0	0	0	1	0.333333	0.57735
Ycl028w	Rnq1	0	0	0	0	0	1	0	0	0.333333	0.57735
Ycl045c	Emc1	0	0	0	0	0	0	1	0	0.333333	0.57735
Ycl057c-a	Mic10	0	0	0	0	0	1	0	0	0.333333	0.57735
Ycr077c	Pat1	0	0	0	0	0	0	1	0	0.333333	0.57735
Ycr093w	Cdc39	0	0	0	0	0	0	0	1	0.333333	0.57735
Ydl060w	Tsr1	0	0	0	0	0	1	0	0	0.333333	0.57735
Ydl088c	Asm4	0	0	0	0	0	1	0	0	0.333333	0.57735
Ydl134c	Pph21	0	0	0	0	0	0	0	1	0.333333	0.57735
Ydl178w	Dld2	0	0	0	0	0	0	0	1	0.333333	0.57735
Ydl235c	Ypd1	0	0	0	0	0	1	0	0	0.333333	0.57735
Ydr034c	Lys14	0	0	0	0	0	1	0	0	0.333333	0.57735
Ydr062w	Lcb2	0	0	0	0	0	0	0	1	0.333333	0.57735
Ydr120c	Trm1	0	0	0	0	0	0	0	1	0.333333	0.57735
Ydr141c	Dop1	0	0	0	0	0	0	0	1	0.333333	0.57735
Ydr189w	Sly1	0	0	0	0	0	1	0	0	0.333333	0.57735
Ydr294c	Dpl1	0	0	0	0	0	1	0	0	0.333333	0.57735
Ydr300c	Pro1	0	0	0	0	0	0	0	1	0.333333	0.57735
Ydr335w	Msn5	0	0	0	0	0	0	0	1	0.333333	0.57735
Ydr434w	Gpi17	0	0	0	0	0	0	1	0	0.333333	0.57735
Yel042w	Gda1	0	0	0	0	0	1	0	0	0.333333	0.57735
Yel061c	Cin8	0	0	0	0	0	0	1	0	0.333333	0.57735
Yer023w	Pro3	0	0	0	0	0	1	0	0	0.333333	0.57735
Yer062c	Gpp2	0	0	0	0	0	0	1	0	0.333333	0.57735
Yfl048c	Emp47	0	0	0	0	0	0	1	0	0.333333	0.57735
Ygl049c/Ygr162w	Tif4632/Tif4631	0	0	0	0	0	1	0	0	0.333333	0.57735
Ygl184c	Str3	0	0	0	0	0	1	0	0	0.333333	0.57735
Ygl213c	Ski8	0	0	0	0	0	0	0	1	0.333333	0.57735
Ygr001c	Efm5	0	0	0	0	0	0	1	0	0.333333	0.57735
Ygr019w	Uga1	0	0	0	0	0	0	0	1	0.333333	0.57735
Ygr055w	Mup1	0	0	0	0	0	0	1	0	0.333333	0.57735
Ygr090w	Utp22	0	0	0	0	0	0	0	1	0.333333	0.57735
Ygr103w	Nop7	0	0	0	0	0	0	1	0	0.333333	0.57735
Ygr111w	Ygr111w	0	0	0	0	0	0	1	0	0.333333	0.57735
Ygr148c	Rpl24b	0	0	0	0	0	1	0	0	0.333333	0.57735
Ygr240c/Ymr205c	Pfk1/Pfk2	0	0	0	0	0	1	0	0	0.333333	0.57735
Ygr258c	Rad2	0	0	0	0	0	0	1	0	0.333333	0.57735
Ygr281w	Yor1	0	0	0	0	0	0	1	0	0.333333	0.57735
Yhr007c	Erg11	0	0	0	0	0	1	0	0	0.333333	0.57735
Yhr012w	Vps29	0	0	0	0	0	1	0	0	0.333333	0.57735
Yhr029c	Yhi9	0	0	0	0	0	1	0	0	0.333333	0.57735
Yhr030c/Ylr113w/Ypr054w	Slt2/Hog1/Smk1	0	0	0	0	0	0	0	1	0.333333	0.57735
Yhr047c	Aap1	0	0	0	0	0	0	0	1	0.333333	0.57735
Yhr098c	Sfb3	0	0	0	0	0	0	0	1	0.333333	0.57735
Yhr158c	Kel1	0	0	0	0	0	1	0	0	0.333333	0.57735
Yhr196w	Utp9	0	0	0	0	0	1	0	0	0.333333	0.57735
Yil008w	Urm1	0	0	0	0	0	1	0	0	0.333333	0.57735
Yil009w/Ymr246w	Faa3/Faa4	0	0	0	0	0	0	0	1	0.333333	0.57735
Yil026c	Irr1	0	0	0	0	0	0	0	1	0.333333	0.57735
Yil048w	Neo1	0	0	0	0	0	0	1	0	0.333333	0.57735
Yil063c	Yrb2	0	0	0	0	0	0	1	0	0.333333	0.57735
Yil112w	Hos4	0	0	0	0	0	0	0	1	0.333333	0.57735
Yir004w	Djp1	0	0	0	0	0	0	1	0	0.333333	0.57735
Yir012w	Sqt1	0	0	0	0	0	0	0	1	0.333333	0.57735
Yir043c		0	0	0	0	0	1	0	0	0.333333	0.57735
Yjl055w	Yjl055w	0	0	0	0	0	0	1	0	0.333333	0.57735
Yjl096w	Mrpl49	0	0	0	0	0	0	1	0	0.333333	0.57735
Yjl128c	Pbs2	0	0	0	0	0	1	0	0	0.333333	0.57735
Yjl130c/Yjr109c	Ura2/Cpa2	0	0	0	0	0	0	1	0	0.333333	0.57735
Yjl155c	Fbp26	0	0	0	0	0	0	1	0	0.333333	0.57735
Yjl183w	Mnn11	0	0	0	0	0	0	0	1	0.333333	0.57735
Yjl200c	Aco2	0	0	0	0	0	0	0	1	0.333333	0.57735
Yjr032w	Cpr7	0	0	0	0	0	0	0	1	0.333333	0.57735
Yjr051w	Osm1	0	0	0	0	0	1	0	0	0.333333	0.57735
Yjr088c	Emc2	0	0	0	0	0	0	0	1	0.333333	0.57735
Ykl033w-a	Ykl033w-a	0	0	0	0	0	0	1	0	0.333333	0.57735
Ykl049c	Cse4	0	0	0	0	0	1	0	0	0.333333	0.57735
Ykl155c	Rsm22	0	0	0	0	0	0	1	0	0.333333	0.57735
Ykl165c-a	Ykl165c-a	0	0	0	0	0	0	1	0	0.333333	0.57735
Ykr002w	Pap1	0	0	0	0	0	1	0	0	0.333333	0.57735
Ykr003w	Osh6	0	0	0	0	0	0	0	1	0.333333	0.57735
Ykr054c	Dyn1	0	0	0	0	0	0	0	1	0.333333	0.57735
Ykr080w	Mtd1	0	0	0	0	0	0	0	1	0.333333	0.57735
Yll023c	Pom33	0	0	0	0	0	0	1	0	0.333333	0.57735
Ylr034c	Smf3	0	0	0	0	0	0	0	1	0.333333	0.57735
Ylr077w	Fmp25	0	0	0	0	0	0	1	0	0.333333	0.57735
Ylr093c	Nyv1	0	0	0	0	0	0	0	1	0.333333	0.57735
Ylr113w	Hog1	0	0	0	0	0	0	0	1	0.333333	0.57735
Ylr115w	Cft2	0	0	0	0	0	1	0	0	0.333333	0.57735
Ylr139c	Sls1	0	0	0	0	0	1	0	0	0.333333	0.57735
Ylr174w/Ynl009w	Idp2/Idp3	0	0	0	0	0	1	0	0	0.333333	0.57735
Ylr199c	Pba1	0	0	0	0	0	0	1	0	0.333333	0.57735
Ylr219w	Msc3	0	0	0	0	0	0	0	1	0.333333	0.57735
Ylr222c	Utp13	0	0	0	0	0	0	0	1	0.333333	0.57735
Ylr345w	Ylr345w	0	0	0	0	0	1	0	0	0.333333	0.57735
Ylr389c	Ste23	0	0	0	0	0	0	1	0	0.333333	0.57735
Ylr414c	Pun1	0	0	0	0	0	0	0	1	0.333333	0.57735
Ylr449w	Fpr4	0	0	0	0	0	1	0	0	0.333333	0.57735
Yml055w	Spc2	0	0	0	0	0	0	0	1	0.333333	0.57735
Ymr134w	Erg29	0	0	0	0	0	0	1	0	0.333333	0.57735
Ymr208w	Erg12	0	0	0	0	0	0	1	0	0.333333	0.57735
Ymr220w	Erg8	0	0	0	0	0	0	0	1	0.333333	0.57735
Ymr222c	Fsh2	0	0	0	0	0	0	0	1	0.333333	0.57735
Ymr237w/Yor299w	Bch1/Bud7	0	0	0	0	0	1	0	0	0.333333	0.57735
Ymr275c	Bul1	0	0	0	0	0	0	0	1	0.333333	0.57735
Ymr296c	Lcb1	0	0	0	0	0	0	1	0	0.333333	0.57735
Ynl026w	Sam50	0	0	0	0	0	0	1	0	0.333333	0.57735
Ynl045w	Lap2	0	0	0	0	0	0	0	1	0.333333	0.57735
Ynl052w	Cox5a	0	0	0	0	0	0	1	0	0.333333	0.57735
Ynl108c	Ynl108c	0	0	0	0	0	0	0	1	0.333333	0.57735
Ynl110c	Nop15	0	0	0	0	0	0	0	1	0.333333	0.57735
Ynl115c	Ynl115c	0	0	0	0	0	0	0	1	0.333333	0.57735
Ynl123w	Nma111	0	0	0	0	0	1	0	0	0.333333	0.57735
Ynl147w	Lsm7	0	0	0	0	0	1	0	0	0.333333	0.57735
Ynl186w	Ubp10	0	0	0	0	0	0	1	0	0.333333	0.57735
Ynl259c	Atx1	0	0	0	0	0	1	0	0	0.333333	0.57735
Ynr034w	Sol1	0	0	0	0	0	1	0	0	0.333333	0.57735
Ynr043w	Mvd1	0	0	0	0	0	0	1	0	0.333333	0.57735
Yol077c	Brx1	0	0	0	0	0	1	0	0	0.333333	0.57735
Yol109w	Zeo1	0	0	0	0	0	0	0	1	0.333333	0.57735
Yol140w	Arg8	0	0	0	0	0	0	1	0	0.333333	0.57735
Yor021c	Sfm1	0	0	0	0	0	0	0	1	0.333333	0.57735
Yor089c	Vps21	0	0	0	0	0	1	0	0	0.333333	0.57735
Yor090c	Ptc5	0	0	0	0	0	0	0	1	0.333333	0.57735
Yor113w	Azf1	0	0	0	0	0	0	1	0	0.333333	0.57735
Yor163w	Ddp1	0	0	0	0	0	1	0	0	0.333333	0.57735
Yor176w	Hem15	0	0	0	0	0	0	1	0	0.333333	0.57735
Yor210w	Rpb10	0	0	0	0	0	1	0	0	0.333333	0.57735
Yor276w	Caf20	0	0	0	0	0	0	1	0	0.333333	0.57735
Yor283w	Yor283w	0	0	0	0	0	0	0	1	0.333333	0.57735
Yor340c	Rpa43	0	0	0	0	0	1	0	0	0.333333	0.57735
Ypl019c	Vtc3	0	0	0	0	0	0	1	0	0.333333	0.57735
Ypl031c	Pho85	0	0	0	0	0	1	0	0	0.333333	0.57735
Ypl094c	Sec62	0	0	0	0	0	0	1	0	0.333333	0.57735
Ypl115c	Bem3	0	0	0	0	0	0	1	0	0.333333	0.57735
Ypl117c	Idi1	0	0	0	0	0	1	0	0	0.333333	0.57735
Ypl137c	Gip3	0	0	0	0	0	0	1	0	0.333333	0.57735
Ypl234c	Vma11	0	0	0	0	0	1	0	0	0.333333	0.57735
Ypl246c	Rbd2	0	0	0	0	0	0	1	0	0.333333	0.57735
Ypr016c	Tif6	0	0	0	0	0	0	0	1	0.333333	0.57735
Ypr029c	Apl4	0	0	0	0	0	0	1	0	0.333333	0.57735
Ypr060c	Aro7	0	0	0	0	0	0	1	0	0.333333	0.57735
Ypr112c	Mrd1	0	0	0	0	0	0	1	0	0.333333	0.57735
Ypr180w	Aos1	0	0	0	0	0	0	0	1	0.333333	0.57735
Ypr189w	Ski3	0	0	0	0	0	0	0	1	0.333333	0.57735
R0020c	Rep1	1	1	0	0.666667	0.57735	0	0	0	0	0
R0030w	Raf1	0	0	1	0.333333	0.57735	0	0	0	0	0
Yal021c	Ccr4	0	0	1	0.333333	0.57735	0	0	0	0	0
Yal023c/Yor321w	Pmt2/Pmt3	1	0	0	0.333333	0.57735	0	0	0	0	0
Yal039c	Cyc3	0	0	1	0.333333	0.57735	0	0	0	0	0
Yal047c	Spc72	0	0	1	0.333333	0.57735	0	0	0	0	0
Yar035w	Yat1	0	1	1	0.666667	0.57735	0	0	0	0	0
Ybl068w/Yer099c	Prs4/Prs2	0	1	0	0.333333	0.57735	0	0	0	0	0
Ybl091c	Map2	1	0	0	0.333333	0.57735	0	0	0	0	0
Ybr003w	Coq1	0	1	0	0.333333	0.57735	0	0	0	0	0
Ybr054w/Ydr033w	Yro2/Mrh1	1	1	2	1.33333	0.57735	0	0	0	0	0
Ybr089c-a	Nhp6b	0	1	0	0.333333	0.57735	0	0	0	0	0
Ybr137w	Ybr137w	2	1	0	1	1	0	0	0	0	0
Ybr162c	Tos1	0	1	1	0.666667	0.57735	0	0	0	0	0
Ybr170c	Npl4	0	1	1	0.666667	0.57735	0	0	0	0	0
Ybr218c	Pyc2	1	0	1	0.666667	0.57735	0	0	0	0	0
Ybr244w/Yir037w	Gpx2/Hyr1	1	1	0	0.666667	0.57735	0	0	0	0	0
Ybr280c	Saf1	1	0	0	0.333333	0.57735	0	0	0	0	0
Ycl017c	Nfs1	3	2	4	3	1	0	0	0	0	0
Ycl074w		1	0	0	0.333333	0.57735	0	0	0	0	0
Ycr021c	Hsp30	0	2	1	1	1	0	0	0	0	0
Ycr036w	Rbk1	0	0	1	0.333333	0.57735	0	0	0	0	0
Ycr052w	Rsc6	0	1	0	0.333333	0.57735	0	0	0	0	0
Ydl022w/Yol059w	Gpd1/Gpd2	0	1	1	0.666667	0.57735	0	0	0	0	0
Ydl046w	Npc2	0	0	1	0.333333	0.57735	0	0	0	0	0
Ydl052c	Slc1	0	1	0	0.333333	0.57735	0	0	0	0	0
Ydl066w/Ynl009w	Idp1/Idp3	1	0	0	0.333333	0.57735	0	0	0	0	0
Ydl132w	Cdc53	1	1	4	2	1.73205	0	0	0	0	0
Ydl134c/Ydl188c	Pph21/Pph22	0	1	0	0.333333	0.57735	0	0	0	0	0
Ydl201w	Trm8	1	1	0	0.666667	0.57735	0	0	0	0	0
Ydl204w	Rtn2	0	1	0	0.333333	0.57735	0	0	0	0	0
Ydl213c	Nop6	0	1	1	0.666667	0.57735	0	0	0	0	0
Ydl215c	Gdh2	0	0	1	0.333333	0.57735	0	0	0	0	0
Ydl225w	Shs1	0	1	0	0.333333	0.57735	0	0	0	0	0
Ydr098c/Yer174c	Grx3/Grx4	2	2	0	1.33333	1.1547	0	0	0	0	0
Ydr150w	Num1	0	0	1	0.333333	0.57735	0	0	0	0	0
Ydr161w	Acl4	1	0	1	0.666667	0.57735	0	0	0	0	0
Ydr301w	Cft1	0	0	1	0.333333	0.57735	0	0	0	0	0
Ydr334w	Swr1	0	0	1	0.333333	0.57735	0	0	0	0	0
Ydr342c	Hxt7	1	1	1	1	0	0	0	0	0	0
Ydr342c/Ydr343c	Hxt7/Hxt6	4	4	5	4.33333	0.57735	0	0	0	0	0
Ydr343c	Hxt6	1	1	1	1	0	0	0	0	0	0
Ydr361c	Bcp1	0	1	0	0.333333	0.57735	0	0	0	0	0
Ydr395w	Sxm1	0	0	2	0.666667	1.1547	0	0	0	0	0
Ydr404c	Rpb7	1	0	0	0.333333	0.57735	0	0	0	0	0
Ydr510w	Smt3	0	1	0	0.333333	0.57735	0	0	0	0	0
Yel022w/Yjr031c	Gea2/Gea1	0	0	1	0.333333	0.57735	0	0	0	0	0
Yel024w	Rip1	0	1	0	0.333333	0.57735	0	0	0	0	0
Yel040w	Utr2	0	2	0	0.666667	1.1547	0	0	0	0	0
Yer014w	Hem14	0	1	1	0.666667	0.57735	0	0	0	0	0
Yer024w	Yat2	0	1	1	0.666667	0.57735	0	0	0	0	0
Yer026c	Cho1	1	0	0	0.333333	0.57735	0	0	0	0	0
Yer031c/Ygl210w	Ypt31/Ypt32	0	1	2	1	1	0	0	0	0	0
Yer042w	Mxr1	0	0	1	0.333333	0.57735	0	0	0	0	0
Yer049w	Tpa1	1	3	2	2	1	0	0	0	0	0
Yer070w	Rnr1	0	0	1	0.333333	0.57735	0	0	0	0	0
Yer089c	Ptc2	1	0	0	0.333333	0.57735	0	0	0	0	0
Yfl004w	Vtc2	1	0	2	1	1	0	0	0	0	0
Yfl047w	Rgd2	0	1	0	0.333333	0.57735	0	0	0	0	0
Yfr014c	Cmk1	0	0	1	0.333333	0.57735	0	0	0	0	0
Yfr015c/Ylr258w	Gsy1/Gsy2	1	1	1	1	0	0	0	0	0	0
Yfr028c	Cdc14	0	0	1	0.333333	0.57735	0	0	0	0	0
Ygl049c	Tif4632	0	0	1	0.333333	0.57735	0	0	0	0	0
Ygl099w	Lsg1	0	1	1	0.666667	0.57735	0	0	0	0	0
Ygl119w	Coq8	0	1	0	0.333333	0.57735	0	0	0	0	0
Ygl130w	Ceg1	0	0	1	0.333333	0.57735	0	0	0	0	0
Ygl190c	Cdc55	1	2	2	1.66667	0.57735	0	0	0	0	0
Ygr012w	Ygr012w	0	1	0	0.333333	0.57735	0	0	0	0	0
Ygr132c	Phb1	1	0	0	0.333333	0.57735	0	0	0	0	0
Ygr199w	Pmt6	0	0	1	0.333333	0.57735	0	0	0	0	0
Ygr250c	Ygr250c	0	1	0	0.333333	0.57735	0	0	0	0	0
Ygr253c	Pup2	0	2	1	1	1	0	0	0	0	0
Yhr001w/Ykr003w	Osh7/Osh6	0	1	0	0.333333	0.57735	0	0	0	0	0
Yhr051w	Cox6	0	1	1	0.666667	0.57735	0	0	0	0	0
Yhr067w	Htd2	1	0	0	0.333333	0.57735	0	0	0	0	0
Yhr069c	Rrp4	1	0	0	0.333333	0.57735	0	0	0	0	0
Yhr113w	Ape4	0	0	1	0.333333	0.57735	0	0	0	0	0
Yhr179w/Ypl171c	Oye2/Oye3	0	0	1	0.333333	0.57735	0	0	0	0	0
Yil021w	Rpb3	0	2	0	0.666667	1.1547	0	0	0	0	0
Yil027c	Emc5	1	0	0	0.333333	0.57735	0	0	0	0	0
Yil035c	Cka1	0	0	1	0.333333	0.57735	0	0	0	0	0
Yil045w	Pig2	0	1	0	0.333333	0.57735	0	0	0	0	0
Yil070c	Mam33	0	1	0	0.333333	0.57735	0	0	0	0	0
Yil105c	Slm1	1	1	1	1	0	0	0	0	0	0
Yil109c/Ynl049c	Sec24/Sfb2	0	1	1	0.666667	0.57735	0	0	0	0	0
Yil169c	Css1	0	1	1	0.666667	0.57735	0	0	0	0	0
Yir009w	Msl1	1	1	1	1	0	0	0	0	0	0
Yir036c	Irc24	3	2	2	2.33333	0.57735	0	0	0	0	0
Yjl036w	Snx4	1	0	0	0.333333	0.57735	0	0	0	0	0
Yjl066c	Mpm1	1	0	0	0.333333	0.57735	0	0	0	0	0
Yjl076w	Net1	1	0	1	0.666667	0.57735	0	0	0	0	0
Yjl136c/Ykr057w	Rps21b/Rps21a	1	0	0	0.333333	0.57735	0	0	0	0	0
Yjl154c	Vps35	0	0	1	0.333333	0.57735	0	0	0	0	0
Yjl158c	Cis3	1	1	1	1	0	0	0	0	0	0
Yjl190c	Rps22a	1	0	0	0.333333	0.57735	0	0	0	0	0
Yjr019c	Tes1	0	1	0	0.333333	0.57735	0	0	0	0	0
Yjr125c	Ent3	1	0	1	0.666667	0.57735	0	0	0	0	0
Yjr143c	Pmt4	2	0	0	0.666667	1.1547	0	0	0	0	0
Ykl008c	Lac1	1	0	0	0.333333	0.57735	0	0	0	0	0
Ykl009w	Mrt4	0	1	0	0.333333	0.57735	0	0	0	0	0
Ykl129c	Myo3	0	2	1	1	1	0	0	0	0	0
Ykl129c/Ymr109w	Myo3/Myo5	1	1	1	1	0	0	0	0	0	0
Ykl151c	Ykl151c	2	4	4	3.33333	1.1547	0	0	0	0	0
Ykl163w	Pir3	2	2	1	1.66667	0.57735	0	0	0	0	0
Ykl178c	Ste3	0	0	1	0.333333	0.57735	0	0	0	0	0
Ykr008w	Rsc4	0	0	1	0.333333	0.57735	0	0	0	0	0
Ykr042w	Uth1	0	1	1	0.666667	0.57735	0	0	0	0	0
Yll001w	Dnm1	0	0	1	0.333333	0.57735	0	0	0	0	0
Yll036c	Prp19	0	1	0	0.333333	0.57735	0	0	0	0	0
Ylr045c	Stu2	0	0	1	0.333333	0.57735	0	0	0	0	0
Ylr357w	Rsc2	1	1	0	0.666667	0.57735	0	0	0	0	0
Ylr388w	Rps29a	1	1	1	1	0	0	0	0	0	0
Ylr409c	Utp21	0	0	1	0.333333	0.57735	0	0	0	0	0
Ylr410w	Vip1	0	1	1	0.666667	0.57735	0	0	0	0	0
Ylr418c	Cdc73	0	1	0	0.333333	0.57735	0	0	0	0	0
Yml059c	Nte1	1	0	0	0.333333	0.57735	0	0	0	0	0
Yml075c	Hmg1	0	1	0	0.333333	0.57735	0	0	0	0	0
Yml117w	Nab6	0	0	1	0.333333	0.57735	0	0	0	0	0
Ymr072w	Abf2	1	1	1	1	0	0	0	0	0	0
Ymr110c	Hfd1	0	0	1	0.333333	0.57735	0	0	0	0	0
Ymr125w	Sto1	0	2	2	1.33333	1.1547	0	0	0	0	0
Ymr183c	Sso2	1	2	1	1.33333	0.57735	0	0	0	0	0
Ymr215w	Gas3	2	1	2	1.66667	0.57735	0	0	0	0	0
Ymr219w	Esc1	1	0	1	0.666667	0.57735	0	0	0	0	0
Ymr304w	Ubp15	0	0	1	0.333333	0.57735	0	0	0	0	0
Ynl001w	Dom34	0	0	1	0.333333	0.57735	0	0	0	0	0
Ynl091w	Nst1	0	0	1	0.333333	0.57735	0	0	0	0	0
Ynl098c	Ras2	1	0	1	0.666667	0.57735	0	0	0	0	0
Ynl248c	Rpa49	1	0	0	0.333333	0.57735	0	0	0	0	0
Ynl251c	Nrd1	0	0	2	0.666667	1.1547	0	0	0	0	0
Ynl298w	Cla4	1	0	0	0.333333	0.57735	0	0	0	0	0
Ynl330c	Rpd3	0	0	1	0.333333	0.57735	0	0	0	0	0
Ynr003c	Rpc34	0	0	2	0.666667	1.1547	0	0	0	0	0
Ynr029c	Ynr029c	0	1	0	0.333333	0.57735	0	0	0	0	0
Ynr067c	Dse4	4	2	5	3.66667	1.52753	0	0	0	0	0
Yol004w	Sin3	0	1	0	0.333333	0.57735	0	0	0	0	0
Yol012c	Htz1	0	1	1	0.666667	0.57735	0	0	0	0	0
Yol041c	Nop12	2	0	0	0.666667	1.1547	0	0	0	0	0
Yol055c	Thi20	1	1	4	2	1.73205	0	0	0	0	0
Yol076w	Mdm20	1	1	1	1	0	0	0	0	0	0
Yol094c	Rfc4	1	0	0	0.333333	0.57735	0	0	0	0	0
Yol126c	Mdh2	1	0	1	0.666667	0.57735	0	0	0	0	0
Yol131w	Yol131w	0	0	1	0.333333	0.57735	0	0	0	0	0
Yol158c	Enb1	0	0	1	0.333333	0.57735	0	0	0	0	0
Yor014w	Rts1	0	1	0	0.333333	0.57735	0	0	0	0	0
Yor039w	Ckb2	1	0	1	0.666667	0.57735	0	0	0	0	0
Yor103c	Ost2	1	1	1	1	0	0	0	0	0	0
Yor109w	Inp53	0	0	1	0.333333	0.57735	0	0	0	0	0
Yor124c	Ubp2	1	0	0	0.333333	0.57735	0	0	0	0	0
Yor171c	Lcb4	0	0	1	0.333333	0.57735	0	0	0	0	0
Yor206w	Noc2	0	1	0	0.333333	0.57735	0	0	0	0	0
Yor288c	Mpd1	1	0	0	0.333333	0.57735	0	0	0	0	0
Yor289w	Yor289w	0	2	0	0.666667	1.1547	0	0	0	0	0
Yor298c-a	Mbf1	2	0	2	1.33333	1.1547	0	0	0	0	0
Yor336w	Kre5	0	1	1	0.666667	0.57735	0	0	0	0	0
Ypl010w	Ret3	0	1	0	0.333333	0.57735	0	0	0	0	0
Ypl058c	Pdr12	1	2	2	1.66667	0.57735	0	0	0	0	0
Ypl093w	Nog1	1	0	1	0.666667	0.57735	0	0	0	0	0
Ypl119c	Dbp1	1	0	1	0.666667	0.57735	0	0	0	0	0
Ypl126w	Nan1	0	0	1	0.333333	0.57735	0	0	0	0	0
Ypl169c	Mex67	0	0	1	0.333333	0.57735	0	0	0	0	0
Ypl206c	Pgc1	0	1	0	0.333333	0.57735	0	0	0	0	0
Ypl210c	Srp72	1	1	2	1.33333	0.57735	0	0	0	0	0
Ypl222w	Fmp40	1	1	0	0.666667	0.57735	0	0	0	0	0
Ypr052c	Nhp6a	0	1	0	0.333333	0.57735	0	0	0	0	0
Ypr091c	Nvj2	1	0	0	0.333333	0.57735	0	0	0	0	0
Ypr097w	Ypr097w	1	0	0	0.333333	0.57735	0	0	0	0	0
Ypr100w	Mrpl51	1	0	0	0.333333	0.57735	0	0	0	0	0
Ypr194c	Opt2	1	0	0	0.333333	0.57735	0	0	0	0	0
