# Supplementary material for: Genetic profiling of protein burden and nuclear export overload
Source: eLife journal article supplement (doi:10.7554/elife.54080), 2020-11-04
Supplement: supp [file elife-54080-supp-v1.zip › elife_poa_e54080_Figure_7_source_data_1.xlsx]

## Sheet: Likelihood ratio test
1. List of 51 parameters detected to have difference among four strains.
IDa	Pb	Qc	Descriptiond
A122_A1B	6.95701e-05	0.00283134	Number of bright actin patches
ACV120_A1B	0.000371008	0.00283134	Noise of total length of actin patch link
C115_A	0.000137992	0.00283134	Whole cell axis ratio
CCV104_C	0.000239106	0.00283134	Noise of short axis length in mother
CCV117_C	0.000254431	0.00283134	Noise of cell outline ratio
D106_C	0.00018592	0.00283134	Ratio of D103 to C103
D152_C	0.000298263	0.00283134	Mobility of nucleus in mother
D162_C	0.000373062	0.00283134	Angle between D1-1D1-2 and C1C4-1
D163_C	7.55923e-05	0.00283134	Angle between D2-1D2-2 and C1C4-1
DCV113_C	0.000363219	0.00283134	Noise of ratio of D109 to C107
DCV125_C	0.000213491	0.00283134	Noise of distance between nuclear gravity center in mother and mother hip
DCV128_C	0.000280665	0.00283134	Noise of distance between nuclear brightest point in mother and mother tip
DCV188_A	0.00020695	0.00283134	Noise of distance between nuclear gravity center and brightest point
ACV121_A1B	0.00049725	0.00306626	Noise of maximal distance between patches
D191_A	0.000487926	0.00306626	Average of nuclear brightness
DCV141_C	0.000489841	0.00306626	Noise of distance between nuclear brightest point in mother and mother hip
D169_C	0.000577393	0.00335102	Angle between C4-1D1-1 and C4-1C1
CCV118_C	0.000745946	0.00408874	Noise of cell size ratio
ACV7-1_A	0.000925069	0.00425452	Noise of size of actin region
C111_C	0.000948678	0.00425452	Distance between bud tip and mother short axis extension
C127_A	0.000936581	0.00425452	Thickness difference of cell wall
D170_C	0.000822474	0.00425452	Angle between C4-1D2-1 and C4-1C1
C114_C	0.00115307	0.00494632	Bud axis ratio
D16-1_A	0.00151326	0.00552974	Maximal intensity of nuclear brightness
D16-3_A1B	0.00146207	0.00552974	Maximal intensity of nuclear brightness
DCV15-3_C	0.00148806	0.00552974	Noise of nuclear brightness in whole cell
DCV162_C	0.00142524	0.00552974	Noise of angle between D1-1D1-2 and C1C4-1
A115	0.00211216	0.00651224	Actin b ratio to no bud cells
C127_A1B	0.00193833	0.00651224	Thickness difference of cell wall
C127_C	0.00210151	0.00651224	Thickness difference of cell wall
D170_A1B	0.00200583	0.00651224	Angle between C4-1D2-1 and C4-1C1
D193_A1B	0.00187376	0.00651224	Average of nuclear brightness
A121_A1B	0.00248259	0.00720412	Maximal distance between patches
DCV123_C	0.00244288	0.00720412	Noise of ratio of D121 to C107
D17-2_C	0.00284549	0.00802126	Nuclear fitness for ellipse in bud
D182_A	0.00293423	0.00804166	Nuclear axis ratio
A120_A1B	0.00318264	0.00848672	Total length of actin patch link
D142_A1B	0.00344576	0.00894656	Distance between nuclear brightest point and mother hip
A103_A1B	0.00393929	0.00971655	Relative distance of actin patch center from neck in mother
D15-2_C	0.00387449	0.00971655	Nuclear brightness in bud
A113	0.00465287	0.00972637	Actin n ratio
A113_A	0.00412	0.00972637	Actin n ratio
A123_C	0.00490785	0.00972637	Ratio of actin patches to actin region
A7-1_A	0.00421549	0.00972637	Size of actin region
C116_C	0.00492909	0.00972637	Axis ratio ratio
D125_C	0.00470725	0.00972637	Distance between nuclear gravity center in mother and mother hip
D141_C	0.00438322	0.00972637	Distance between nuclear brightest point in mother and mother hip
DCV15-2_C	0.00479935	0.00972637	Noise of nuclear brightness in bud
DCV194_A	0.00430048	0.00972637	Noise of maximal intensity of nuclear brightness divided by average
DCV197_C	0.00482098	0.00972637	Noise of ratio of nuclear size
DCV14-1_A	0.00511423	0.00989382	Noise of nuclear size
aID of morphological parameters. Red, green, blue indicates morphological parameters of actin cytoskeleton, cell wall, and nucleus, respectively.
bP value of the likelihood ratio test.
cQ value estimated by qvalue function in R (Storey, 2002).
dDescription of morphological parameters. Full list of the morphological parameters is available in Saccharomyces cerevisiae morphological database (https://scmd.gi.k.u-tokyo.ac.jp/datamine/).

## Sheet: Q value of Wald test
2. Q value in each strain for the detection of difference from vector control at FDR = 0.01 by Wald test
IDa	GFPy66gb	Gpm1c	Gpm1-me	Descriptionf
A120_A1B	0.000230065	0.00925263	0.000230065	Total length of actin patch link
A122_A1B	0.000302331	0.000245418	0.000914009	Number of bright actin patches
ACV7-1_A	0.00075036	0.00468736	0.00138654	Noise of size of actin region
DCV188_A	0.00348481	0.000230065	0.00685329	Noise of distance between nuclear gravity center and brightest point
DCV14-1_A	0.00863994	0.00118394	0.0124138	Noise of nuclear size
A121_A1B	0.000230065	0.0150227	0.000230065	Maximal distance between patches
DCV162_C	0.000853038	0.0758497	0.00521856	Noise of angle between D1-1D1-2 and C1C4-1
A123_C	0.00331919	0.113722	0.00348481	Ratio of actin patches to actin region
ACV120_A1B	0.0049036	0.0524134	0.000230065	Noise of total length of actin patch link
A7-1_A	0.000914009	0.0253769	0.0142819	Size of actin region
C116_C	0.00165951	0.160467	0.049986	Axis ratio ratio
C114_C	0.00171803	0.216957	0.175841	Bud axis ratio
DCV123_C	0.00331919	0.014717	0.167089	Noise of ratio of D121 to C107
A115	0.00575779	0.0110567	0.206612	Actin b ratio to no bud cells
DCV113_C	0.0059804	0.0508995	0.149975	Noise of ratio of D109 to C107
CCV117_C	0.00925263	0.0134218	0.0280591	Noise of cell outline ratio
D17-2_C	0.0103463	0.000828986	0.0103463	Nuclear fitness for ellipse in bud
DCV194_A	0.0110567	0.00457016	0.197767	Noise of maximal intensity of nuclear brightness divided by average
D182_A	0.0124403	0.000786232	0.0348255	Nuclear axis ratio
C127_A1B	0.0129628	0.000735907	0.0195219	Thickness difference of cell wall
DCV197_C	0.0199155	0.00103244	0.0402555	Noise of ratio of nuclear size
C127_A	0.0249879	0.000452751	0.0195219	Thickness difference of cell wall
A113	0.0252924	0.00925263	0.108882	Actin n ratio
C127_C	0.0794086	0.000910777	0.0103463	Thickness difference of cell wall
CCV104_C	0.153234	0.00366014	0.0184533	Noise of short axis length in mother
A103_A1B	0.177209	0.00213555	0.197767	Relative distance of actin patch center from neck in mother
D170_A1B	0.197767	0.00213555	0.0244689	Angle between C4-1D2-1 and C4-1C1
DCV15-3_C	0.212792	0.00824558	0.0267333	Noise of nuclear brightness in whole cell
D163_C	0.0103463	0.167089	0.000251558	Angle between D2-1D2-2 and C1C4-1
ACV121_A1B	0.0142819	0.101094	0.000302331	Noise of maximal distance between patches
D193_A1B	0.0151987	0.120095	0.00418503	Average of nuclear brightness
D16-3_A1B	0.0154912	0.126209	0.00329359	Maximal intensity of nuclear brightness
D142_A1B	0.0592048	0.180418	0.00255675	Distance between nuclear brightest point and mother hip
D162_C	0.069325	0.206678	0.000735907	Angle between D1-1D1-2 and C1C4-1
D170_C	0.119034	0.0681337	0.00284995	Angle between C4-1D2-1 and C4-1C1
D141_C	0.122005	0.178438	0.00186267	Distance between nuclear brightest point in mother and mother hip
DCV141_C	0.137539	0.131265	0.000914009	Noise of distance between nuclear brightest point in mother and mother hip
D152_C	0.139576	0.0166364	0.000914009	Mobility of nucleus in mother
DCV128_C	0.172383	0.0396768	0.00075036	Noise of distance between nuclear brightest point in mother and mother tip
D169_C	0.172383	0.0898443	0.00192856	Angle between C4-1D1-1 and C4-1C1
DCV125_C	0.174278	0.174278	0.00212809	Noise of distance between nuclear gravity center in mother and mother hip
D106_C	0.197767	0.0450669	0.000383938	Ratio of D103 to C103
C115_A	0.197767	0.0195219	0.00160702	Whole cell axis ratio
D125_C	0.197767	0.214167	0.00263731	Distance between nuclear gravity center in mother and mother hip
D15-2_C	0.0105948	0.0681337	0.0298545	Nuclear brightness in bud
CCV118_C	0.014717	0.0129628	0.0592048	Noise of cell size ratio
D16-1_A	0.0154912	0.0316781	0.0110567	Maximal intensity of nuclear brightness
D191_A	0.0305367	0.0144989	0.0142819	Average of nuclear brightness
C111_C	0.0310411	0.0592048	0.0614162	Distance between bud tip and mother short axis extension
DCV15-2_C	0.0696666	0.0112937	0.108882	Noise of nuclear brightness in bud
A113_A	0.216957	0.216957	0.216957	Actin n ratio
aID of morphological parameters. Red, green, blue indicates morphological parameters of actin cytoskeleton, cell wall, and nucleus, respectively.
b-eQ values between vector control and each strain in the 51 parameters detected at FDR = 0.01 by one-way ANOVA. Yellow indicates parameters significantly different at FDR = 0.01 by Wald test.
eDescription of morphological parameters. Full list of the morphological parameters is available in Saccharomyces cerevisiae morphological database (https://scmd.gi.k.u-tokyo.ac.jp/datamine/).

## Sheet: Morphological features
3. List of morphological parameters correlated to four independent morphological features
PCa	IDb	Zc	Loadingd	Descriptione
PC1	A7-1_A	4.30588	0.536025	Size_of_actin_region
PC1	ACV7-1_A	4.62211	0.441147	Noise_of_size_of_actin_region
PC1	C114_C	3.88446	-0.3891	Bud_axis_ratio
PC1	A115	-3.0164	-0.609149	Actin_b_ratio_to_no_bud_cells
PC1	A121_A1B	6.30317	-0.918835	Maximal_distance_between_patches
PC1	A122_A1B	5.36896	-0.91994	Number_of_bright_actin_patches
PC1	A120_A1B	7.03078	-0.923731	Total_length_of_actin_patch_link
PC1	A123_C	3.418	-0.94886	Ratio_of_actin_patches_to_actin_region
PC2	A7-1_A	4.30588	0.517962	Size_of_actin_region
PC2	A115	-3.0164	-0.484064	Actin_b_ratio_to_no_bud_cells
PC2	DCV113_C	-3.13065	-0.499855	Noise_of_ratio_of_D109_to_C107
PC2	C114_C	3.88446	-0.520813	Bud_axis_ratio
PC2	DCV123_C	-3.41049	-0.569947	Noise_of_ratio_of_D121_to_C107
PC2	C116_C	3.91807	-0.663123	Axis_ratio_ratio
PC3	DCV188_A	3.52411	0.446253	Noise_of_distance_between_nuclear_gravity_center_and_brightest_point
PC3	C116_C	3.91807	0.420363	Axis_ratio_ratio
PC3	DCV123_C	-3.41049	-0.764739	Noise_of_ratio_of_D121_to_C107
PC3	DCV113_C	-3.13065	-0.814491	Noise_of_ratio_of_D109_to_C107
PC4	ACV120_A1B	3.2703	0.733939	Noise_of_total_length_of_actin_patch_link
PC4	A7-1_A	4.30588	0.365089	Size_of_actin_region
PC4	CCV117_C	-2.76068	-0.576926	Noise_of_cell_outline_ratio
aPrincipal component (PC) explaining 60% of variance in Z value of 16 parameters (detected in GFPy66g) of 109 replicates of his3Δ (see Methods)
bID of morphological parameters. Red, green, blue indicates morphological parameters of actin cytoskeleton, cell wall, and nucleus, respectively.
cZ value of Wald test between vector control and GFPy66g. Orange and blue indicate positive and negative value, respectively.
dPC loading (i.e. correlation coefficient) between PC and morphological parameter. Red and green indicate positive and negative value, respectively.
eDescription of morphological parameters. Coloured texts indicate representative parameters used for the illustration of morphological parameters in Figure 6E.
