# Supplementary material for: Genetic profiling of protein burden and nuclear export overload
Source: eLife journal article supplement (doi:10.7554/elife.54080), 2020-11-04
Supplement: supp [file elife-54080-supp-v1.zip › elife_poa_e54080_Supplementary_file_1.xlsx]

## Sheet: Supplementary File 1
Enriched GO or publication in the genes harboring genetic interaction with GFP-op.
GO term or Publication	p-value	Matches	ID	# of Matches
Positive interaction genes (100 genes)
GO: biological_process
tRNA catabolic process	0.000645806	YDL175C,YDR280W,YGR195W,YJL050W,YOL021C,YOR001W	GO:0016078	6
nuclear polyadenylation-dependent tRNA catabolic process	0.000645806	YDL175C,YDR280W,YGR195W,YJL050W,YOL021C,YOR001W	GO:0071038	6
RNA 3'-end processing	0.00170532	YDL108W,YDR228C,YDR280W,YGL043W,YGR195W,YJL050W,YLR115W,YLR430W,YOL021C,YOR001W	GO:0031123	10
polyadenylation-dependent ncRNA catabolic process	0.00296152	YDL175C,YDR280W,YGR195W,YJL050W,YOL021C,YOR001W	GO:0043634	6
nuclear ncRNA surveillance	0.00296152	YDL175C,YDR280W,YGR195W,YJL050W,YOL021C,YOR001W	GO:0071029	6
nuclear polyadenylation-dependent ncRNA catabolic process	0.00296152	YDL175C,YDR280W,YGR195W,YJL050W,YOL021C,YOR001W	GO:0071046	6
polyadenylation-dependent RNA catabolic process	0.00554757	YDL175C,YDR280W,YGR195W,YJL050W,YOL021C,YOR001W	GO:0043633	6
nuclear polyadenylation-dependent mRNA catabolic process	0.015466	YDR280W,YGR195W,YJL050W,YOL021C,YOR001W	GO:0071042	5
polyadenylation-dependent mRNA catabolic process	0.015466	YDR280W,YGR195W,YJL050W,YOL021C,YOR001W	GO:0071047	5
polyadenylation-dependent snoRNA 3'-end processing	0.015466	YDR280W,YGR195W,YJL050W,YOL021C,YOR001W	GO:0071051	5
snoRNA metabolic process	0.0242817	YBR257W,YDL175C,YDR280W,YGR195W,YJL050W,YLR430W,YOL021C,YOR001W	GO:0016074	8
nuclear mRNA surveillance	0.0258316	YDL175C,YDR280W,YGR195W,YJL050W,YOL021C,YOR001W	GO:0071028	6
snoRNA 3'-end processing	0.0321327	YDR280W,YGR195W,YJL050W,YLR430W,YOL021C,YOR001W	GO:0031126	6
snoRNA processing	0.0387466	YBR257W,YDR280W,YGR195W,YJL050W,YLR430W,YOL021C,YOR001W	GO:0043144	7
exonucleolytic trimming to generate mature 3'-end of 5.8S rRNA from tricistronic rRNA transcript (SSU-rRNA, 5.8S rRNA, LSU-rRNA)	0.042368	YDR280W,YGR195W,YJL050W,YOL021C,YOR001W	GO:0000467	5
nuclear RNA surveillance	0.0484676	YDL175C,YDR280W,YGR195W,YJL050W,YOL021C,YOR001W	GO:0071027	6
GO: celluar_component
nucleoplasm part	2.54495e-05	YBR095C,YBR193C,YCR081W,YDL108W,YDR228C,YDR311W,YDR392W,YER148W,YER171W,YGL113W,YHR058C,YIL084C,YKR062W,YLR005W,YLR115W,YMR112C,YPR023C,YPR070W	GO:0044451	18
intracellular organelle part	2.90472e-05	YBL105C,YBR095C,YBR109C,YBR118W,YBR142W,YBR193C,YBR247C,YBR257W,YCL044C,YCR071C,YCR081W,YDL008W,YDL061C,YDL108W,YDL175C,YDR116C,YDR228C,YDR280W,YDR311W,YDR375C,YDR392W,YDR395W,YER093C,YER148W,YER171W,YGL113W,YGR195W,YHR036W,YHR058C,YHR153C,YHR164C,YHR186C,YIL022W,YIL076W,YIL084C,YIL090W,YIL109C,YIL134W,YIL150C,YJL050W,YJR073C,YJR117W,YKL006C-A,YKL042W,YKL052C,YKL112W,YKL137W,YKL165C,YKL172W,YKR03…	GO:0044446	76
organelle part	3.33541e-05	YBL105C,YBR095C,YBR109C,YBR118W,YBR142W,YBR193C,YBR247C,YBR257W,YCL044C,YCR071C,YCR081W,YDL008W,YDL061C,YDL108W,YDL175C,YDR116C,YDR228C,YDR280W,YDR311W,YDR375C,YDR392W,YDR395W,YER093C,YER148W,YER171W,YGL113W,YGR195W,YHR036W,YHR058C,YHR153C,YHR164C,YHR186C,YIL022W,YIL076W,YIL084C,YIL090W,YIL109C,YIL134W,YIL150C,YJL050W,YJR073C,YJR117W,YKL006C-A,YKL042W,YKL052C,YKL112W,YKL137W,YKL165C,YKL172W,YKR03…	GO:0044422	76
nuclear lumen	3.44291e-05	YBR095C,YBR142W,YBR193C,YBR247C,YBR257W,YCR081W,YDL108W,YDL175C,YDR228C,YDR280W,YDR311W,YDR392W,YER148W,YER171W,YGL113W,YGR195W,YHR058C,YHR153C,YHR164C,YIL084C,YIL150C,YJL050W,YKL052C,YKL172W,YKR037C,YKR062W,YKR083C,YLR005W,YLR086W,YLR115W,YLR233C,YMR112C,YOL021C,YOR001W,YPR023C,YPR034W,YPR070W	GO:0031981	37
RNA polymerase II transcription factor complex	0.000118046	YBR193C,YDL108W,YDR311W,YDR392W,YER148W,YER171W,YHR058C,YKR062W,YLR005W,YMR112C,YPR070W	GO:0090575	11
nuclear part	0.00015313	YBR095C,YBR142W,YBR193C,YBR247C,YBR257W,YCR081W,YDL008W,YDL108W,YDL175C,YDR228C,YDR280W,YDR311W,YDR392W,YDR395W,YER148W,YER171W,YGL113W,YGR195W,YHR036W,YHR058C,YHR153C,YHR164C,YIL084C,YIL150C,YJL050W,YJR117W,YKL052C,YKL112W,YKL172W,YKR037C,YKR062W,YKR083C,YLR005W,YLR086W,YLR115W,YLR233C,YMR112C,YMR240C,YOL021C,YOR001W,YOR249C,YPR023C,YPR034W,YPR070W	GO:0044428	44
membrane-enclosed lumen	0.000157886	YBR095C,YBR142W,YBR193C,YBR247C,YBR257W,YCR071C,YCR081W,YDL108W,YDL175C,YDR116C,YDR228C,YDR280W,YDR311W,YDR392W,YER148W,YER171W,YGL113W,YGR195W,YHR058C,YHR153C,YHR164C,YIL022W,YIL084C,YIL150C,YJL050W,YKL052C,YKL137W,YKL172W,YKR037C,YKR062W,YKR083C,YLR005W,YLR086W,YLR115W,YLR233C,YMR112C,YNL117W,YOL021C,YOR001W,YOR232W,YPR023C,YPR034W,YPR070W	GO:0031974	43
organelle lumen	0.000157886	YBR095C,YBR142W,YBR193C,YBR247C,YBR257W,YCR071C,YCR081W,YDL108W,YDL175C,YDR116C,YDR228C,YDR280W,YDR311W,YDR392W,YER148W,YER171W,YGL113W,YGR195W,YHR058C,YHR153C,YHR164C,YIL022W,YIL084C,YIL150C,YJL050W,YKL052C,YKL137W,YKL172W,YKR037C,YKR062W,YKR083C,YLR005W,YLR086W,YLR115W,YLR233C,YMR112C,YNL117W,YOL021C,YOR001W,YOR232W,YPR023C,YPR034W,YPR070W	GO:0043233	43
intracellular organelle lumen	0.000157886	YBR095C,YBR142W,YBR193C,YBR247C,YBR257W,YCR071C,YCR081W,YDL108W,YDL175C,YDR116C,YDR228C,YDR280W,YDR311W,YDR392W,YER148W,YER171W,YGL113W,YGR195W,YHR058C,YHR153C,YHR164C,YIL022W,YIL084C,YIL150C,YJL050W,YKL052C,YKL137W,YKL172W,YKR037C,YKR062W,YKR083C,YLR005W,YLR086W,YLR115W,YLR233C,YMR112C,YNL117W,YOL021C,YOR001W,YOR232W,YPR023C,YPR034W,YPR070W	GO:0070013	43
nucleoplasm	0.000212763	YBR095C,YBR193C,YCR081W,YDL108W,YDR228C,YDR311W,YDR392W,YER148W,YER171W,YGL113W,YHR058C,YIL084C,YKR062W,YLR005W,YLR115W,YMR112C,YPR023C,YPR070W	GO:0005654	18
transcription factor complex	0.000257686	YBR193C,YDL108W,YDR311W,YDR392W,YER148W,YER171W,YHR058C,YKR062W,YLR005W,YMR039C,YMR112C,YPR070W	GO:0005667	12
nuclear transcription factor complex	0.000741528	YBR193C,YDL108W,YDR311W,YDR392W,YER148W,YER171W,YHR058C,YKR062W,YLR005W,YMR112C,YPR070W	GO:0044798	11
protein-containing complex	0.000949296	YBR095C,YBR118W,YBR137W,YBR193C,YBR247C,YBR257W,YCL044C,YCR071C,YCR081W,YDL008W,YDL061C,YDL108W,YDL175C,YDR116C,YDR228C,YDR280W,YDR311W,YDR392W,YDR395W,YER093C,YER148W,YER171W,YGL113W,YGR195W,YHR058C,YHR186C,YIL022W,YIL076W,YIL084C,YIL109C,YIL150C,YJL050W,YJL101C,YKL006C-A,YKL052C,YKL112W,YKL172W,YKR037C,YKR062W,YKR083C,YLR005W,YLR026C,YLR086W,YLR115W,YLR233C,YLR430W,YMR039C,YMR112C,YMR240C,YNR01…	GO:0032991	59
transcription factor TFIIH holo complex	0.0176017	YDL108W,YDR311W,YER171W,YLR005W	GO:0005675	4
TIM23 mitochondrial import inner membrane translocase complex	0.0260623	YIL022W,YNR017W,YOR232W,YPL098C	GO:0005744	4
nuclear exosome (RNase complex)	0.0371606	YDR280W,YGR195W,YOL021C,YOR001W	GO:0000176	4
Publication
A comprehensive strategy enabling high-resolution functional analysis of the yeast genome.	1.13222e-09	YAL041W,YBL105C,YBR109C,YBR142W,YBR193C,YBR247C,YBR257W,YDL008W,YDL108W,YDR164C,YDR182W,YDR228C,YDR311W,YHR007C,YHR036W,YHR058C,YHR164C,YHR186C,YIL022W,YIL150C,YJL050W,YKL042W,YKL052C,YKL112W,YKL165C,YKR037C,YKR062W,YKR083C,YLR005W,YLR026C,YLR086W,YLR115W,YLR430W,YMR240C,YNR017W,YOL021C,YOR103C,YOR232W,YOR249C,YPL255W,YPR023C,YPR034W	18622397	42
Structure of a Complete Mediator-RNA Polymerase II Pre-Initiation Complex.	1.29952e-07	YBR193C,YDL108W,YDR311W,YER148W,YER171W,YGL043W,YHR058C,YKR062W,YLR005W,YMR112C,YPR070W	27610567	11
The exosome and RNA quality control in the nucleus.	9.98319e-05	YDL175C,YDR280W,YGR195W,YJL050W,YLR430W,YOL021C,YOR001W	17603538	7
The basal initiation machinery: beyond the general transcription factors.	0.000103932	YBR193C,YDL108W,YDR311W,YDR392W,YER148W,YER171W,YGL043W,YHR058C,YKR062W,YLR005W,YMR112C,YPR070W	19411170	12
Promoter activation when the ChIPs are down.	0.000206774	YBR193C,YCR081W,YDL108W,YDR311W,YER148W,YER171W,YHR058C,YLR005W,YMR112C,YPR070W	16462809	10
Recent structural insights into transcription preinitiation complexes.	0.00100948	YBR193C,YCR081W,YDL108W,YDR311W,YER171W,YHR058C,YLR005W,YMR112C,YPR070W	11082032	9
Exosome-mediated quality control: substrate recruitment and molecular activity.	0.00117594	YDL175C,YDR280W,YGR195W,YJL050W,YLR430W,YOL021C,YOR001W	18313413	7
Unraveling framework of the ancestral Mediator complex in human diseases.	0.00131591	YBR193C,YCR081W,YDR311W,YER148W,YER171W,YHR058C,YKR062W,YLR005W,YMR112C,YPR070W	21983542	10
Structure of an RNA polymerase II preinitiation complex.	0.00164146	YDL108W,YDR311W,YER148W,YER171W,YKR062W,YLR005W,YMR039C	26483468	7
Non-coding transcription by RNA polymerase II in yeast: Hasard or nécessité?	0.00225418	YDL108W,YDL175C,YDR228C,YJL050W,YLR430W,YOL021C,YOR001W	25956976	7
Overlapping pathways dictate termination of RNA polymerase II transcription.	0.00256763	YDL175C,YDR228C,YDR280W,YGR195W,YJL050W,YLR430W,YOL021C,YOR001W	17629387	8
RNA degradation by the exosome is promoted by a nuclear polyadenylation complex.	0.00316988	YDL175C,YDR280W,YGR195W,YJL050W,YOL021C,YOR001W	15935758	6
A view to a kill: structure of the RNA exosome.	0.00316988	YDL175C,YDR280W,YGR195W,YJL050W,YOL021C,YOR001W	17174886	6
A new yeast poly(A) polymerase complex involved in RNA quality control.	0.00718575	YDL175C,YDR280W,YGR195W,YJL050W,YOL021C,YOR001W	15828860	6
Comparison of the yeast and human nuclear exosome complexes.	0.00718575	YDL175C,YDR280W,YGR195W,YJL050W,YOL021C,YOR001W	22817747	6
Threading the barrel of the RNA exosome.	0.00718575	YDL175C,YDR280W,YGR195W,YJL050W,YOL021C,YOR001W	23910895	6
Conserved RNA polymerase II initiation complex structure.	0.00776108	YBR193C,YDR311W,YER148W,YER171W,YHR058C,YKR062W,YLR005W,YMR112C,YPR070W	28437704	9
RNA quality control in eukaryotes.	0.010385	YDL175C,YDR280W,YGR195W,YJL050W,YOL021C,YOR001W	18022361	6
Molecular genetics of the RNA polymerase II general transcriptional machinery.	0.0111187	YBR193C,YCR081W,YDL108W,YDR311W,YER148W,YER171W,YHR058C,YKR062W,YLR005W,YPR070W	9618449	10
Noncoding RNA Surveillance: The Ends Justify the Means.	0.0145826	YDL175C,YDR280W,YGR195W,YJL050W,YLR430W,YOL021C,YOR001W	29023106	7
RNA polymerase II holoenzymes and subcomplexes.	0.0145826	YCR081W,YDL108W,YDR311W,YER171W,YHR058C,YKR062W,YLR005W	9774381	7
Mediator-dependent recruitment of TFIIH modules in preinitiation complex.	0.0145942	YDL108W,YER148W,YER171W,YLR005W,YMR112C	18691966	5
Cotranscriptional recruitment of RNA exosome cofactors Rrp47p and Mpp6p and two distinct Trf-Air-Mtr4 polyadenylation (TRAMP) complexes assists the exonuclease Rrp6p in the targeting and degradation of an aberrant messenger ribonucleoprotein particle (mRNP) in yeast.	0.0145942	YDL175C,YGR195W,YJL050W,YOL021C,YOR001W	24047896	5
RNA-quality control by the exosome.	0.0146697	YDL175C,YDR280W,YGR195W,YJL050W,YOL021C,YOR001W	16829983	6
The exosome: a macromolecular cage for controlled RNA degradation.	0.0146697	YDL175C,YDR280W,YGR195W,YJL050W,YOL021C,YOR001W	16968219	6
The cytoplasmic mRNA degradation factor Pat1 is required for rRNA processing.	0.0146697	YDL175C,YDR280W,YGR195W,YJL050W,YOL021C,YOR001W	26918764	6
RNA decay machines: the exosome.	0.0203086	YDL175C,YDR280W,YGR195W,YJL050W,YOL021C,YOR001W	23352926	6
Hyperphosphorylation of the C-terminal repeat domain of RNA polymerase II facilitates dissociation of its complex with mediator.	0.020894	YBR193C,YCR081W,YDL108W,YDR311W,YER171W,YHR058C,YLR005W,YPR070W	17376774	8
Nuclear mRNA Surveillance Mechanisms: Function and Links to Human Disease.	0.0227843	YDL175C,YDR280W,YGR195W,YJL050W,YLR430W,YOL021C,YOR001W	29758258	7
Degradation of ribosomal RNA precursors by the exosome.	0.0247428	YDR280W,YGR195W,YJL050W,YOL021C,YOR001W	10734186	5
The yin and yang of the exosome.	0.0247428	YDR280W,YGR195W,YJL050W,YOL021C,YOR001W	11849973	5
Resolution of factors required for the initiation of transcription by yeast RNA polymerase II.	0.0247428	YDL108W,YDR311W,YER148W,YER171W,YLR005W	2193032	5
Functional correlation among Gal11, transcription factor (TF) IIE, and TFIIH in Saccharomyces cerevisiae. Gal11 and TFIIE cooperatively enhance TFIIH-mediated phosphorylation of RNA polymerase II carboxyl-terminal domain sequences.	0.0247428	YDL108W,YDR311W,YER171W,YKR062W,YLR005W	9545282	5
Nuclear noncoding RNA surveillance: is the end in sight?	0.0276116	YDL175C,YDR280W,YGR195W,YJL050W,YOL021C,YOR001W	22475369	6
Cryptic pol II transcripts are degraded by a nuclear quality control pathway involving a new poly(A) polymerase.	0.0373741	YDL175C,YJL050W,YOL021C,YOR001W	15935759	4
Gal11p dosage-compensates transcriptional activator deletions via Taf14p.	0.0392371	YBR193C,YCR081W,YDR311W,YDR392W,YER148W,YKR062W,YLR005W,YPR034W	17919657	8
TRAMP Stimulation of Exosome.	0.0397644	YDL175C,YJL050W,YLR430W,YOL021C,YOR001W	27166441	5
Genome-based analysis of Chlamydomonas reinhardtii exoribonucleases and poly(A) polymerases predicts unexpected organellar and exosomal features.	0.0487064	YDL175C,YDR280W,YGR195W,YJL050W,YOL021C,YOR001W	18493045	6
Negative interaction genes (71 genes)
GO: biological_process
cytoskeleton organization	0.0137485	YAL041W,YBL007C,YDR016C,YDR389W,YFL039C,YGR113W,YHR127W,YIL118W,YIR006C,YKL048C,YKR001C,YMR117C,YMR198W,YOR035C	GO:0007010	14
cell division	0.015234	YAL024C,YAL041W,YBL016W,YCR063W,YDR016C,YDR182W,YFL039C,YGR113W,YHR030C,YIL106W,YIR006C,YKL048C,YKR001C,YLR190W,YMR117C	GO:0051301	15
GO: celluar_component
cellular bud	0.00234328	YAL024C,YAL041W,YBL007C,YBR200W,YFL039C,YGL233W,YHR030C,YIL106W,YIL118W,YIR006C,YJL085W,YKL048C,YLR190W	GO:0005933	13
cellular bud neck	0.00664326	YAL041W,YBL007C,YBR200W,YFL039C,YGL233W,YHR030C,YIL106W,YIR006C,YJL085W,YKL048C,YLR190W	GO:0005935	11
site of polarized growth	0.0293537	YAL041W,YBL007C,YBL016W,YBR200W,YFL039C,YGL233W,YHR030C,YIL106W,YIR006C,YJL085W,YKL048C,YLR190W	GO:0030427	12
mating projection tip	0.0331516	YAL041W,YBL007C,YBL016W,YBR200W,YGL233W,YHR030C,YIR006C,YJL085W	GO:0043332	8
cytoskeleton	0.0456377	YBL007C,YBR200W,YDR016C,YDR389W,YFL039C,YGR113W,YIL106W,YIR006C,YKL048C,YKR001C,YMR198W	GO:0005856	11
Publication
A comprehensive strategy enabling high-resolution functional analysis of the yeast genome.	0.000825116	YAL041W,YBL041W,YCL052C,YDL102W,YDL105W,YDR062W,YDR182W,YDR238C,YDR311W,YDR331W,YGL022W,YGL073W,YGL120C,YGL142C,YGL233W,YGR113W,YIL118W,YIR006C,YJL085W,YJR057W,YKR081C,YML023C,YMR117C,YNR003C,YOL123W,YOR057W,YPR183W	18622397	27
Polarization of cell growth in yeast.	0.00182861	YAL041W,YBL007C,YBR200W,YFL039C,YGL233W,YHR030C,YIL118W,YIR006C,YJL085W,YKL048C	10652251	10
Polarization of cell growth in yeast. I. Establishment and maintenance of polarity states.	0.0136803	YAL041W,YBL016W,YBR200W,YDR389W,YFL039C,YHR030C,YIL118W,YJL085W	10639324	8
The machinery for cell polarity, cell morphogenesis, and the cytoskeleton in the Basidiomycete fungus Ustilago maydis-a survey of the genome sequence.	0.0450428	YBL007C,YBR200W,YFL039C,YGL233W,YIL118W,YIR006C,YJL085W	18582586	7
Interaction between a Ras and a Rho GTPase couples selection of a growth site to the development of cell polarity in yeast.	0.0478283	YAL024C,YAL041W,YBR200W,YFL039C,YGL167C,YGL168W	12960420	6
