# Supplementary material for: Genetic profiling of protein burden and nuclear export overload
Source: eLife journal article supplement (doi:10.7554/elife.54080), 2020-11-04
Supplement: supp [file elife-54080-supp-v1.zip › elife_poa_e54080_Supplementary_file_2.xlsx]

## Sheet: Supplementary File 2A (GFP)
Table S2A. Enriched GO or publication of GFP_L and GFP_H mutants harboring genetic interactions with GFP-op,
GO term or Publication	p-value	Matches	ID	# of Matches
GFP-op_nega GFP_H (21 genes)
No enrichment found.
GFP-op_nega GFP_L (48 genes)
GO: celluar_component
cellular bud	0.00208443	YAL024C,YAL041W,YBL007C,YBR200W,YFL039C,YGL233W,YIL106W,YIL118W,YJL085W,YKL048C,YLR190W	GO:0005933	11
cellular bud neck	0.013098	YAL041W,YBL007C,YBR200W,YFL039C,YGL233W,YIL106W,YJL085W,YKL048C,YLR190W	GO:0005935	9
site of polarized growth	0.0294951	YAL041W,YBL007C,YBL016W,YBR200W,YFL039C,YGL233W,YIL106W,YJL085W,YKL048C,YLR190W	GO:0030427	10
Publication
Polarization of cell growth in yeast.	0.012907	YAL041W,YBL007C,YBR200W,YFL039C,YGL233W,YIL118W,YJL085W,YKL048C	10652251	8
Polarization of cell growth in yeast. I. Establishment and maintenance of polarity states.	0.013847	YAL041W,YBL016W,YBR200W,YDR389W,YFL039C,YIL118W,YJL085W	10639324	7
The Rho GTPase Rho3 has a direct role in exocytosis that is distinct from its role in actin polarity.	0.015599	YBR200W,YGL233W,YIL118W,YJL085W	10588647	4
Central roles of small GTPases in the development of cell polarity in yeast and beyond.	0.0200589	YAL041W,YBR200W,YFL039C,YGL233W,YIL118W,YJL085W	17347519	6
The yeast dynamin-related GTPase Vps1p functions in the organization of the actin cytoskeleton via interaction with Sla1p.	0.0204201	YBL007C,YFL039C,YKR001C	15265985	3
Yeast RHO3 and RHO4 ras superfamily genes are necessary for bud growth, and their defect is suppressed by a high dose of bud formation genes CDC42 and BEM1.	0.025871	YAL041W,YBR200W,YFL039C,YIL118W	1448099	4
A Cellular System for Spatial Signal Decoding in Chemical Gradients.	0.0404564	YAL041W,YBL016W,YBR200W,YJL085W	26585298	4
GFP-op_posi GFP_H (51 genes)
GO: biological_process
organelle organization	0.00242237	YAL041W,YBL105C,YBR095C,YBR109C,YBR118W,YDL008W,YDR164C,YER093C,YER171W,YGL113W,YHR036W,YHR153C,YHR164C,YIL022W,YIL076W,YIL109C,YIL150C,YKL042W,YKL052C,YKL112W,YKL137W,YKR037C,YKR083C,YLR026C,YLR086W,YLR430W,YNR017W,YOR232W,YOR249C,YPL255W	GO:0006996	30
GO: celluar_component
intracellular organelle part	7.15958e-05	YBL105C,YBR095C,YBR109C,YBR118W,YBR193C,YBR247C,YCL044C,YDL008W,YDL175C,YDR228C,YDR280W,YDR311W,YDR395W,YER093C,YER171W,YGL113W,YHR036W,YHR153C,YHR164C,YHR186C,YIL022W,YIL076W,YIL109C,YIL150C,YJL050W,YJR117W,YKL042W,YKL052C,YKL112W,YKL137W,YKL165C,YKR037C,YKR062W,YKR083C,YLR026C,YLR086W,YLR430W,YMR240C,YMR272C,YNR017W,YOR232W,YOR249C,YPL255W,YPR095C	GO:0044446	43
organelle part	7.86037e-05	YBL105C,YBR095C,YBR109C,YBR118W,YBR193C,YBR247C,YCL044C,YDL008W,YDL175C,YDR228C,YDR280W,YDR311W,YDR395W,YER093C,YER171W,YGL113W,YHR036W,YHR153C,YHR164C,YHR186C,YIL022W,YIL076W,YIL109C,YIL150C,YJL050W,YJR117W,YKL042W,YKL052C,YKL112W,YKL137W,YKL165C,YKR037C,YKR062W,YKR083C,YLR026C,YLR086W,YLR430W,YMR240C,YMR272C,YNR017W,YOR232W,YOR249C,YPL255W,YPR095C	GO:0044422	43
protein-containing complex	0.00259856	YAL041W,YBR095C,YBR118W,YBR137W,YBR193C,YBR247C,YCL044C,YDL008W,YDL175C,YDR228C,YDR280W,YDR311W,YDR395W,YER093C,YER171W,YGL113W,YHR186C,YIL022W,YIL076W,YIL109C,YIL150C,YJL050W,YKL052C,YKL112W,YKR037C,YKR062W,YKR083C,YLR026C,YLR086W,YLR430W,YMR240C,YNR017W,YOR232W,YOR249C	GO:0032991	34
central plaque of spindle pole body	0.00988357	YBR109C,YKL042W,YPL255W	GO:0005823	3
nuclear part	0.0150815	YBR095C,YBR193C,YBR247C,YDL008W,YDL175C,YDR228C,YDR280W,YDR311W,YDR395W,YER171W,YGL113W,YHR036W,YHR153C,YHR164C,YIL150C,YJL050W,YJR117W,YKL052C,YKL112W,YKR037C,YKR062W,YKR083C,YLR086W,YMR240C,YOR249C	GO:0044428	24
GFP-op_posi GFP_L (45 genes)
GO: celluar_component
nucleoplasm part	0.000746264	YCR081W,YDL108W,YDR392W,YER148W,YHR058C,YIL084C,YLR005W,YLR115W,YMR112C,YPR023C,YPR070W	GO:0044451	11
nucleoplasm	0.00293834	YCR081W,YDL108W,YDR392W,YER148W,YHR058C,YIL084C,YLR005W,YLR115W,YMR112C,YPR023C,YPR070W	GO:0005654	11
transcription factor complex	0.00501162	YDL108W,YDR392W,YER148W,YHR058C,YLR005W,YMR039C,YMR112C,YPR070W	GO:0005667	7
nuclear lumen	0.00613752	YBR142W,YBR257W,YCR081W,YDL108W,YDR392W,YER148W,YGR195W,YHR058C,YIL084C,YKL172W,YLR005W,YLR115W,YLR233C,YMR112C,YOL021C,YOR001W,YPR023C,YPR034W,YPR070W	GO:0031981	19
RNA polymerase II transcription factor complex	0.0102396	YDL108W,YDR392W,YER148W,YHR058C,YLR005W,YMR112C,YPR070W	GO:0090575	6
membrane-enclosed lumen	0.013234	YBR142W,YBR257W,YCR071C,YCR081W,YDL108W,YDR116C,YDR392W,YER148W,YGR195W,YHR058C,YIL084C,YKL172W,YLR005W,YLR115W,YLR233C,YMR112C,YNL117W,YOL021C,YOR001W,YPR023C,YPR034W,YPR070W	GO:0031974	22
organelle lumen	0.013234	YBR142W,YBR257W,YCR071C,YCR081W,YDL108W,YDR116C,YDR392W,YER148W,YGR195W,YHR058C,YIL084C,YKL172W,YLR005W,YLR115W,YLR233C,YMR112C,YNL117W,YOL021C,YOR001W,YPR023C,YPR034W,YPR070W	GO:0043233	22
intracellular organelle lumen	0.013234	YBR142W,YBR257W,YCR071C,YCR081W,YDL108W,YDR116C,YDR392W,YER148W,YGR195W,YHR058C,YIL084C,YKL172W,YLR005W,YLR115W,YLR233C,YMR112C,YNL117W,YOL021C,YOR001W,YPR023C,YPR034W,YPR070W	GO:0070013	22
nuclear transcription factor complex	0.0309052	YDL108W,YDR392W,YER148W,YHR058C,YLR005W,YMR112C,YPR070W	GO:0044798	6
mediator complex	0.0376564	YCR081W,YHR058C,YMR112C,YPR070W	GO:0016592	4
Publication
Promoter activation when the ChIPs are down.	0.0026607	YCR081W,YDL108W,YER148W,YHR058C,YLR005W,YMR112C,YPR070W	16462809	7
Structure of a Complete Mediator-RNA Polymerase II Pre-Initiation Complex.	0.00722996	YDL108W,YER148W,YHR058C,YLR005W,YMR112C,YPR070W	27610567	6
Metabolic regulation in model ascomycetes--adjusting similar genomes to different lifestyles.	0.0119705	YCR081W,YDR392W,YHR058C,YMR112C,YPR023C,YPR034W,YPR070W	26051071	7
Transcription: Common cofactors and cooperative recruitment.	0.0266385	YCR081W,YER148W,YHR058C,YMR112C,YPR070W	10469586	5
Recent structural insights into transcription preinitiation complexes.	0.0306823	YCR081W,YDL108W,YHR058C,YLR005W,YMR112C,YPR070W	11082032	6
Mediator-dependent recruitment of TFIIH modules in preinitiation complex.	0.0310512	YDL108W,YER148W,YLR005W,YMR112C	18691966	4

## Sheet: Supplementary File2B (NES-tGFP)
Enriched GO or publication of NES-tGFP_L and NES-tGFP_H mutants harboring genetic interactions with NES-tGFP-op,
GO term or Publication	p-value	Matches	ID	# of Matches
NES-tGFP-op_nega GFP_H (55 genes)
GO: biological_process
chromosome organization	4.46094e-05	YBR095C,YBR202W,YDR159W,YDR167W,YDR207C,YDR328C,YDR392W,YFR031C,YGL066W,YGL116W,YGL127C,YGL244W,YGR270W,YHR081W,YLR085C,YLR233C,YLR320W,YLR418C,YML069W,YPR034W,YPR135W,YPR141C	GO:0051276	22
regulation of cellular component organization	0.0146067	YBR057C,YBR095C,YDR328C,YDR477W,YGL066W,YGL116W,YGL244W,YGR101W,YGR270W,YKL203C,YLR233C,YLR418C,YML069W,YMR198W,YNL006W,YPR141C	GO:0051128	16
organelle organization	0.0195798	YBR095C,YBR202W,YDR159W,YDR167W,YDR207C,YDR328C,YDR392W,YDR477W,YDR512C,YFR031C,YGL066W,YGL116W,YGL127C,YGL244W,YGR101W,YGR231C,YGR270W,YHR081W,YKL203C,YLR085C,YLR233C,YLR320W,YLR393W,YLR418C,YML069W,YMR198W,YNL006W,YPR034W,YPR135W,YPR141C	GO:0006996	30
regulation of nitrogen compound metabolic process	0.0263559	YBR095C,YBR202W,YCL032W,YDR207C,YDR328C,YDR392W,YDR477W,YDR512C,YFR031C,YGL066W,YGL116W,YGL127C,YGL244W,YGR231C,YGR270W,YHR081W,YJL157C,YKL203C,YLR005W,YLR233C,YLR418C,YML069W,YNL006W,YNR010W,YPR034W	GO:0051171	25
regulation of macromolecule metabolic process	0.0338866	YBR095C,YBR202W,YCL032W,YDR159W,YDR207C,YDR328C,YDR392W,YDR477W,YDR512C,YFR031C,YGL066W,YGL116W,YGL127C,YGL244W,YGR231C,YGR270W,YHR081W,YJL157C,YKL203C,YLR005W,YLR233C,YLR418C,YML069W,YNL006W,YNR010W,YPR034W	GO:0060255	26
regulation of primary metabolic process	0.0461986	YBR095C,YBR202W,YCL032W,YDR207C,YDR328C,YDR392W,YDR477W,YDR512C,YFR031C,YGL066W,YGL116W,YGL127C,YGL244W,YGR231C,YGR270W,YHR081W,YJL157C,YKL203C,YLR005W,YLR233C,YLR418C,YML069W,YNL006W,YNR010W,YPR034W	GO:0080090	25
GO: cellular_component
nucleoplasm	8.98865e-05	YBR095C,YBR202W,YDR167W,YDR207C,YDR392W,YGL066W,YGL127C,YGL244W,YLR005W,YLR085C,YLR418C,YML069W,YNR010W,YPR034W	GO:0005654	14
nuclear lumen	0.0144226	YBR057C,YBR095C,YBR202W,YDR167W,YDR207C,YDR392W,YFR031C,YGL066W,YGL116W,YGL127C,YGL244W,YHR081W,YLR005W,YLR085C,YLR233C,YLR418C,YML069W,YNL006W,YNR010W,YPR034W,YPR135W	GO:0031981	21
GO: molecular_function
chromatin binding	0.0122584	YBR202W,YDR167W,YFR031C,YGR270W,YLR085C,YLR418C,YML069W,YPR034W,YPR135W	GO:0003682	9
Publication
Global mapping of the yeast genetic interaction network.	5.04954e-05	YBR057C,YBR095C,YDL192W,YDR116C,YDR159W,YDR207C,YDR392W,YDR477W,YDR512C,YGL066W,YGL127C,YGL244W,YGR157W,YGR270W,YJR073C,YLR085C,YLR089C,YLR233C,YLR320W,YLR393W,YLR418C,YMR123W,YMR198W,YMR272C,YPR135W,YPR141C	14764870	26
Genome-wide analysis to identify pathways affecting telomere-initiated senescence in budding yeast.	0.000162635	YGL066W,YGL127C,YGL244W,YGR157W,YLR085C,YLR233C,YLR320W,YLR418C,YMR198W,YPR135W,YPR141C	22384331	11
Cotranscriptional set2 methylation of histone H3 lysine 36 recruits a repressive Rpd3 complex.	0.00234223	YBR095C,YDR159W,YDR392W,YGL127C,YGL244W,YLR085C,YLR418C	16286008	7
Sulfate assimilation mediates tellurite reduction and toxicity in Saccharomyces cerevisiae.	0.0256812	YDR127W,YDR159W,YDR207C,YDR392W,YDR477W,YDR512C,YGL127C,YGR157W,YJL157C,YLR085C,YLR418C,YMR123W	20675578	12
Eukaryotic DNA replication in a chromatin context.	0.0335068	YBR095C,YBR202W,YDR167W,YDR207C,YDR392W,YGL066W,YML069W,YPR034W,YPR135W	17118266	9
NES-tGFP-op_nega GFP_L (67 genes)
GO: biological_process
import into nucleus	5.58319e-08	YBL079W,YBR109C,YDR002W,YGR119C,YGR218W,YHR030C,YIL115C,YKR082W,YLR293C,YML103C,YMR235C,YNL064C	GO:0051170	12
protein import into nucleus	9.18088e-06	YBL079W,YBR109C,YDR002W,YGR119C,YHR030C,YIL115C,YKR082W,YLR293C,YML103C,YMR235C	GO:0006606	10
nucleus organization	1.44187e-05	YBL079W,YBR109C,YDR356W,YGR119C,YHR036W,YIL115C,YKR082W,YLR293C,YML103C,YMR232W	GO:0006997	10
protein localization to nucleus	0.000225653	YBL079W,YBR109C,YDR002W,YGR119C,YHR030C,YIL115C,YKR082W,YLR293C,YML103C,YMR235C	GO:0034504	10
nucleocytoplasmic transport	0.000329903	YBL079W,YBR109C,YDR002W,YGR081C,YGR119C,YGR218W,YHR030C,YIL115C,YKR082W,YLR293C,YML103C,YMR235C,YNL064C	GO:0006913	13
nuclear transport	0.000329903	YBL079W,YBR109C,YDR002W,YGR081C,YGR119C,YGR218W,YHR030C,YIL115C,YKR082W,YLR293C,YML103C,YMR235C,YNL064C	GO:0051169	13
RNA transport	0.00100035	YBL079W,YDR002W,YGR081C,YGR119C,YGR218W,YHR036W,YIL115C,YKR082W,YLR293C,YML103C,YMR235C,YNL064C	GO:0050658	12
establishment of RNA localization	0.00100035	YBL079W,YDR002W,YGR081C,YGR119C,YGR218W,YHR036W,YIL115C,YKR082W,YLR293C,YML103C,YMR235C,YNL064C	GO:0051236	12
nucleic acid transport	0.00114079	YBL079W,YDR002W,YGR081C,YGR119C,YGR218W,YHR036W,YIL115C,YKR082W,YLR293C,YML103C,YMR235C,YNL064C	GO:0050657	12
RNA localization	0.00366177	YBL079W,YDR002W,YGR081C,YGR119C,YGR218W,YHR036W,YIL115C,YKR082W,YLR293C,YML103C,YMR235C,YNL064C	GO:0006403	12
protein import	0.00622109	YBL079W,YBR109C,YDR002W,YGR119C,YHR030C,YIL115C,YKR082W,YLR293C,YML103C,YMR235C	GO:0017038	10
nucleobase-containing compound transport	0.0247813	YBL079W,YDR002W,YGR081C,YGR119C,YGR218W,YHR036W,YIL115C,YKR082W,YLR293C,YML103C,YMR235C,YNL064C	GO:0015931	12
protein-containing complex localization	0.0491804	YBR102C,YDR356W,YGR081C,YGR218W,YIL115C,YJL085W,YKR082W,YLR293C,YML103C,YMR235C	GO:0031503	10
GO: cellular_component
protein-containing complex	0.000295802	YAL002W,YBL079W,YBL093C,YBR082C,YBR084C-A,YBR102C,YBR126C,YDL077C,YDL105W,YDL132W,YDR002W,YDR062W,YDR074W,YDR311W,YER083C,YFL039C,YFR004W,YGL174W,YGR081C,YGR119C,YHR027C,YIL115C,YJL085W,YKL145W,YKR082W,YKR101W,YLR145W,YLR315W,YML023C,YML103C,YMR127C,YMR296C,YNL064C,YNL067W,YNL075W,YNR051C,YOR078W,YOR157C,YOR312C,YPL213W,YPR023C,YPR108W	GO:0032991	42
nuclear pore	0.0119916	YBL079W,YDR002W,YGR119C,YIL115C,YKR082W,YML103C	GO:0005643	6
GO: molecular_function
structural constituent of nuclear pore	0.0396667	YBL079W,YGR119C,YIL115C,YKR082W,YML103C	GO:0017056	5
enzyme binding	0.0434637	YAL002W,YBR082C,YBR109C,YDL077C,YDL132W,YDR002W,YDR168W,YGR218W,YJL085W,YKL145W,YMR232W,YMR235C	GO:0019899	12
Publication
Genome-wide screen uncovers novel pathways for tRNA processing and nuclear-cytoplasmic dynamics.	2.27097e-06	YBL079W,YDR002W,YFL039C,YGR119C,YGR218W,YHR036W,YIL115C,YMR235C	26680305	8
A proteasome assembly defect in rpn3 mutants is associated with Rpn11 instability and increased sensitivity to stress.	0.00101415	YFR004W,YHR027C,YKL145W,YOR157C,YPR108W	21619884	5
Yeast genetics to dissect the nuclear pore complex and nucleocytoplasmic trafficking.	0.00111004	YBL079W,YDR002W,YGR119C,YIL115C,YKR082W,YLR293C,YML103C,YMR235C	9442897	8
Essential genetic interactors of SIR2 required for spatial sequestration and asymmetrical inheritance of protein aggregates.	0.00177524	YBR080C,YBR109C,YDL105W,YDR356W,YFL039C,YGR119C,YHR027C,YKL145W	25079602	8
Identification and characterization of a novel RanGTP-binding protein in the yeast Saccharomyces cerevisiae.	0.00241819	YDR002W,YGR218W,YLR293C,YMR235C	12578832	4
The nuclear export receptor Xpo1p forms distinct complexes with NES transport substrates and the yeast Ran binding protein 1 (Yrb1p).	0.0072048	YDR002W,YGR218W,YLR293C,YMR235C	11251069	4
Proteasome assembly influences interaction with ubiquitinated proteins and shuttle factors.	0.0072048	YFR004W,YHR027C,YKL145W,YPR108W	20061387	4
[Biogenesis of the 26S proteasome in the yeast Saccharomyces cerevisiae].	0.0117793	YBR082C,YDL020C,YFR004W,YHR027C,YKL145W,YOR157C,YPR108W	16922378	7
Polyubiquitin substrates allosterically activate their own degradation by the 26S proteasome.	0.0137418	YBR082C,YDL020C,YFR004W,YHR027C,YKL145W,YOR157C,YPR108W	19169257	7
The N-terminal domain of Rpn4 serves as a portable ubiquitin-independent degron and is recognized by specific 19S RP subunits.	0.0137418	YBR082C,YDL020C,YFR004W,YHR027C,YKL145W,YOR157C,YPR108W	22349505	7
Nuclear Import of Yeast Proteasomes.	0.0159728	YBR082C,YFR004W,YHR027C,YKL145W,YLR293C,YOR157C,YPR108W	26262643	7
Characterization of spindle pole body duplication reveals a regulatory role for nuclear pore complexes.	0.0237026	YBL079W,YDR356W,YIL115C,YKR082W,YML103C	28659328	5
Global mapping of the yeast genetic interaction network.	0.0243027	YAL002W,YBR082C,YBR126C,YDL020C,YDL077C,YDR074W,YER083C,YGL174W,YHR030C,YHR111W,YJL168C,YKR082W,YLR111W,YLR315W,YMR127C,YMR154C,YNL064C,YNR051C,YOR030W,YOR076C,YOR309C,YOR312C,YPL161C,YPL213W,YPR023C	14764870	25
Arsenite interferes with protein folding and triggers formation of protein aggregates in yeast.	0.0282024	YDL020C,YFR004W,YHR027C,YKL145W,YNL064C,YOR157C,YPR108W	22946053	7
Regulatory subunit interactions of the 26S proteasome, a complex problem.	0.0325876	YDL020C,YFR004W,YHR027C,YKL145W,YPR108W	10664589	5
Unified nomenclature for subunits of the Saccharomyces cerevisiae proteasome regulatory particle.	0.0325876	YDL020C,YFR004W,YHR027C,YKL145W,YPR108W	9697412	5
NES-tGFP-op_posi GFP_H (51 genes)
GO: cellular_component
protein-containing complex	0.00409518	YAL041W,YBL023C,YBR060C,YBR193C,YBR247C,YDL014W,YDL030W,YDL084W,YDL102W,YDL175C,YDR180W,YDR212W,YDR292C,YDR395W,YER093C,YGL009C,YGL130W,YGR099W,YHR186C,YIL109C,YIL150C,YJL001W,YJL050W,YKL006C-A,YKL018W,YKL022C,YKR084C,YLR026C,YLR314C,YMR005W,YOR142W,YOR294W,YPL228W,YPR161C	GO:0032991	34
central plaque of spindle pole body	0.0105121	YKL042W,YLR457C,YPL255W	GO:0005823	3
Publication
A comprehensive strategy enabling high-resolution functional analysis of the yeast genome.	6.60614e-12	YAL041W,YBL023C,YBR060C,YBR193C,YBR247C,YDL014W,YDL030W,YDL102W,YDR170C,YDR180W,YDR212W,YDR292C,YGL130W,YGR099W,YHR186C,YIL150C,YJL001W,YJL050W,YKL022C,YKL042W,YLL031C,YLR026C,YLR305C,YLR314C,YLR457C,YMR005W,YOR294W,YOR335C,YPL228W,YPL255W,YPR161C	18622397	31
NES-tGFP-op_posi GFP_L (16 genes)
No enrichment found.

## Sheet: Supplementary File 2C (tGFP)
Enriched GO or publication of tGFP_L and tGFP_H mutants harboring genetic interactions with tGFP-op,
GO term or Publication	p-value	Matches	ID	# of Matches
NES-tGFP-op_nega GFP_H (28 genes)
No enrichment found.
NES-tGFP-op_nega GFP_L (39 genes)
GO: cellular_component
protein-containing complex	0.00317198	YBL093C,YBR126C,YCL037C,YDL102W,YDL105W,YDL132W,YDR049W,YDR062W,YDR311W,YFL039C,YFR052W,YGL174W,YGR135W,YHL030W,YJL085W,YKL074C,YMR005W,YMR198W,YNL064C,YOL004W,YOR069W,YOR078W,YOR106W,YOR157C,YOR308C,YPL043W,YPL178W,YPR161C	GO:0032991	28
NES-tGFP-op_posi GFP_H (11 genes)
GO: cellular_component
central plaque of spindle pole body	0.0442671	YKL042W,YPL255W	GO:0005823	2
Publication
Fission yeast Cdc23 interactions with DNA replication initiation proteins.	0.0240893	YBL023C,YBR060C,YIL150C	12185500	3
NES-tGFP-op_posi GFP_L (8 genes)
No enrichment found.
