# Supplementary material for: Genetic profiling of protein burden and nuclear export overload
Source: eLife journal article supplement (doi:10.7554/elife.54080), 2020-11-04
Supplement: supp [file elife-54080-supp-v1.zip › elife_poa_e54080_Supplementary_file_3.xlsx]

## Sheet: Supplementary File 3
Enriched GO or publication of 14 mutants in Figure 4-S3.
GO term or Publication	p-value	Matches	ID	# of Matches
GO: biological_process
cytoskeleton organization	0.000365616	YAL041W,YER093C,YJR076C,YKL042W,YKL052C,YKR037C,YKR083C,YLR127C	GO:0007010	6
positive regulation of organelle organization	0.00209883	YDR164C,YKL052C,YKR037C,YKR083C,YLR127C,YOR249C	GO:0010638	8
regulation of organelle organization	0.00219513	YAL041W,YDR164C,YER093C,YKL052C,YKR037C,YKR083C,YLR127C,YOR249C	GO:0033043	5
regulation of chromosome segregation	0.00317182	YKL052C,YKR037C,YKR083C,YLR127C,YOR249C	GO:0051983	4
positive regulation of chromosome segregation	0.00481798	YKL052C,YKR037C,YKR083C,YOR249C	GO:0051984	5
positive regulation of cell cycle process	0.00599608	YKL052C,YKR037C,YKR083C,YLR127C,YOR249C	GO:0090068	3
positive regulation of attachment of spindle microtubules to kinetochore	0.0103383	YKL052C,YKR037C,YKR083C	GO:0051987	5
positive regulation of cell cycle	0.0110855	YKL052C,YKR037C,YKR083C,YLR127C,YOR249C	GO:0045787	6
positive regulation of cellular component organization	0.0127844	YDR164C,YKL052C,YKR037C,YKR083C,YLR127C,YOR249C	GO:0051130	3
regulation of attachment of spindle microtubules to kinetochore	0.0137567	YKL052C,YKR037C,YKR083C	GO:0051988	7
cell division	0.0157171	YAL041W,YJR076C,YKL052C,YKR037C,YKR083C,YLR127C,YOR249C	GO:0051301	5
regulation of cytoskeleton organization	0.0157759	YER093C,YKL052C,YKR037C,YKR083C,YLR127C	GO:0051493	8
regulation of cellular component organization	0.0196658	YAL041W,YDR164C,YER093C,YKL052C,YKR037C,YKR083C,YLR127C,YOR249C	GO:0051128	9
cell cycle process	0.0224779	YAL041W,YJR076C,YKL042W,YKL052C,YKR037C,YKR083C,YLR127C,YNL102W,YOR249C	GO:0022402	3
positive regulation of microtubule polymerization or depolymerization	0.0226739	YKL052C,YKR037C,YKR083C	GO:0031112	3
positive regulation of microtubule polymerization	0.0226739	YKL052C,YKR037C,YKR083C	GO:0031116	3
regulation of microtubule polymerization	0.0347686	YKL052C,YKR037C,YKR083C	GO:0031113	6
regulation of cell cycle process	0.0395678	YAL041W,YKL052C,YKR037C,YKR083C,YLR127C,YOR249C	GO:0010564	1
GO: celluar_component
DASH complex	0.00111238	YKL052C,YKR037C,YKR083C	GO:0042729	3
condensed chromosome outer kinetochore	0.0020321	YKL052C,YKR037C,YKR083C	GO:0000940	3
condensed nuclear chromosome outer kinetochore	0.0020321	YKL052C,YKR037C,YKR083C	GO:0000942	5
microtubule cytoskeleton	0.00987077	YJR076C,YKL042W,YKL052C,YKR037C,YKR083C	GO:0015630	4
microtubule	0.0102151	YJR076C,YKL052C,YKR037C,YKR083C	GO:0005874	4
spindle	0.0122287	YJR076C,YKL052C,YKR037C,YKR083C	GO:0005819	4
supramolecular polymer	0.0190506	YJR076C,YKL052C,YKR037C,YKR083C	GO:0099081	4
supramolecular fiber	0.0190506	YJR076C,YKL052C,YKR037C,YKR083C	GO:0099512	4
polymeric cytoskeletal fiber	0.0190506	YJR076C,YKL052C,YKR037C,YKR083C	GO:0099513	1
GO: molecular_function
microtubule plus-end binding	0.024521	YKL052C,YKR037C,YKR083C	GO:0051010	1
Publication
Implication of a novel multiprotein Dam1p complex in outer kinetochore function.	0.0248088	YKL052C,YKR037C,YKR083C	11756468	3
A method for reverse interactome analysis: High-resolution mapping of interdomain interaction network in Dam1 complex and its specific disorganization based on the interaction domain expression.	0.0248088	YKL052C,YKR037C,YKR083C	20730753	1
