# Supplementary material for: Genetic profiling of protein burden and nuclear export overload
Source: eLife journal article supplement (doi:10.7554/elife.54080), 2020-11-04
Supplement: supp [file elife-54080-supp-v1.zip › elife_poa_e54080_Supplementary_file_4.xlsx]

## Sheet: Supplementary File 4
Enriched GO or publication of in each cluster of Figure 5C and 5D.
GO term or Publication	p-value	Matches	ID	# of Matches
Cluster_1
membrane lipid biosynthetic process	0.00829424	YDR062W,YDR434W,YLR459W,YPL076W,YPR183W	GO:0046467	5
GPI anchor biosynthetic process	0.0101606	YDR434W,YLR459W,YPL076W,YPR183W	GO:0006506	4
GPI anchor metabolic process	0.0150784	YDR434W,YLR459W,YPL076W,YPR183W	GO:0006505	4
glycolipid biosynthetic process	0.0150784	YDR434W,YLR459W,YPL076W,YPR183W	GO:0009247	4
membrane lipid metabolic process	0.022747	YDR062W,YDR434W,YLR459W,YPL076W,YPR183W	GO:0006643	5
glycolipid metabolic process	0.0241304	YDR434W,YLR459W,YPL076W,YPR183W	GO:0006664	4
liposaccharide metabolic process	0.0241304	YDR434W,YLR459W,YPL076W,YPR183W	GO:1903509	4
trehalose-phosphatase activity	0.0223401	YBR126C,YDR074W	GO:0004805	2
Cluster_2
cellular protein modification process	0.0246731	YBR009C,YBR015C,YBR082C,YDL028C,YDL105W,YER125W,YFL034C-B,YFL039C,YFR004W,YGL022W,YGL142C,YML023C,YMR127C,YPR179C	GO:0006464	14
protein modification process	0.0246731	YBR009C,YBR015C,YBR082C,YDL028C,YDL105W,YER125W,YFL034C-B,YFL039C,YFR004W,YGL022W,YGL142C,YML023C,YMR127C,YPR179C	GO:0036211	14
The actin cytoskeleton, RAS-cAMP signaling and mitochondrial ROS in yeast apoptosis.	0.0472213	YER125W,YFL039C,YIR006C,YNL138W	16226888	4
Cluster_3
inner plaque of spindle pole body	0.0281507	YDR356W,YLR212C,YNL126W	GO:0005822	3
nucleus	0.0371777	YAL043C,YAL061W,YAR015W,YBL066C,YBL079W,YBR245C,YCR093W,YDL105W,YDL126C,YDL147W,YDR002W,YDR087C,YDR099W,YDR165W,YDR288W,YDR356W,YDR449C,YDR454C,YDR531W,YER045C,YER125W,YFL034C-B,YGR081C,YGR218W,YGR275W,YGR277C,YHR036W,YHR088W,YHR122W,YHR196W,YIL115C,YKL069W,YKL145W,YKR022C,YKR082W,YLR003C,YLR021W,YLR134W,YLR145W,YLR200W,YLR212C,YLR221C,YLR234W,YLR274W,YLR276C,YLR293C,YLR316C,YLR394W,YML016C,YML02…	GO:0005634	68
A comprehensive strategy enabling high-resolution functional analysis of the yeast genome.	1.6982e-05	YAL043C,YBR080C,YBR109C,YCL004W,YCR093W,YDL015C,YDL105W,YDL126C,YDL147W,YDR002W,YDR087C,YDR168W,YDR288W,YDR302W,YDR356W,YDR454C,YDR531W,YER125W,YGL055W,YGL137W,YGR120C,YHR036W,YHR101C,YHR196W,YIL115C,YJR076C,YKL145W,YKR022C,YLR145W,YLR195C,YLR212C,YLR274W,YLR276C,YLR316C,YML023C,YMR093W,YMR200W,YMR235C,YNR038W,YOR149C,YPL128C,YPR108W	18622397	42
Reconstitution and characterization of budding yeast gamma-tubulin complex.	0.0344868	YBR109C,YDR356W,YLR212C,YNL126W	11950928	4
Identification and characterization of a novel RanGTP-binding protein in the yeast Saccharomyces cerevisiae.	0.0344868	YDR002W,YGR218W,YLR293C,YMR235C	12578832	4
Cluster_4
proteasomal ubiquitin-independent protein catabolic process	4.42935e-05	YER094C,YFR050C,YOL038W,YOR157C,YOR362C	GO:0010499	5
proteasome-mediated ubiquitin-dependent protein catabolic process	6.274e-05	YDL132W,YER094C,YFR050C,YGL048C,YHR027C,YNL064C,YOL038W,YOR157C,YOR362C	GO:0043161	9
proteasomal protein catabolic process	0.000122982	YDL132W,YER094C,YFR050C,YGL048C,YHR027C,YNL064C,YOL038W,YOR157C,YOR362C	GO:0010498	9
ubiquitin-dependent protein catabolic process	0.0023298	YDL132W,YER094C,YFR050C,YGL048C,YHR027C,YNL064C,YOL038W,YOR157C,YOR362C	GO:0006511	9
modification-dependent protein catabolic process	0.00279953	YDL132W,YER094C,YFR050C,YGL048C,YHR027C,YNL064C,YOL038W,YOR157C,YOR362C	GO:0019941	9
modification-dependent macromolecule catabolic process	0.00598875	YDL132W,YER094C,YFR050C,YGL048C,YHR027C,YNL064C,YOL038W,YOR157C,YOR362C	GO:0043632	9
proteolysis involved in cellular protein catabolic process	0.00682249	YDL132W,YER094C,YFR050C,YGL048C,YHR027C,YNL064C,YOL038W,YOR157C,YOR362C	GO:0051603	9
cellular protein catabolic process	0.0123178	YDL132W,YER094C,YFR050C,YGL048C,YHR027C,YNL064C,YOL038W,YOR157C,YOR362C	GO:0044257	9
protein catabolic process	0.0201431	YDL132W,YER094C,YFR050C,YGL048C,YHR027C,YNL064C,YOL038W,YOR157C,YOR362C	GO:0030163	9
organonitrogen compound catabolic process	0.038591	YDL080C,YDL132W,YER094C,YFR050C,YGL048C,YHR027C,YNL064C,YOL038W,YOR157C,YOR362C	GO:1901565	10
proteasome storage granule	8.13794e-09	YER094C,YFR050C,YGL048C,YHR027C,YOL038W,YOR157C,YOR362C	GO:0034515	7
cytosolic proteasome complex	1.45529e-08	YER094C,YFR050C,YGL048C,YHR027C,YOL038W,YOR157C,YOR362C	GO:0031597	7
peptidase complex	5.25093e-07	YBR198C,YER094C,YFR050C,YGL048C,YHR027C,YOL038W,YOR157C,YOR362C	GO:1905368	8
proteasome complex	6.24247e-07	YER094C,YFR050C,YGL048C,YHR027C,YOL038W,YOR157C,YOR362C	GO:0000502	7
endopeptidase complex	6.24247e-07	YER094C,YFR050C,YGL048C,YHR027C,YOL038W,YOR157C,YOR362C	GO:1905369	7
proteasome core complex	3.20411e-06	YER094C,YFR050C,YOL038W,YOR157C,YOR362C	GO:0005839	5
protein-containing complex	1.76717e-05	YBL074C,YBL093C,YBR198C,YDL077C,YDL132W,YDL148C,YER094C,YFL039C,YFR050C,YGL048C,YGL174W,YGL212W,YGR119C,YHR024C,YHR027C,YIL026C,YJL104W,YLR315W,YNL064C,YNL075W,YOL038W,YOR078W,YOR157C,YOR362C	GO:0032991	24
proteasome core complex, beta-subunit complex	0.0026883	YER094C,YFR050C,YOR157C	GO:0019774	3
cytosolic part	0.0058416	YER094C,YFR050C,YGL048C,YHR027C,YNL064C,YOL038W,YOR157C,YOR362C	GO:0044445	8
threonine-type endopeptidase activity	7.32165e-06	YER094C,YFR050C,YOL038W,YOR157C,YOR362C	GO:0004298	5
threonine-type peptidase activity	7.32165e-06	YER094C,YFR050C,YOL038W,YOR157C,YOR362C	GO:0070003	5
endopeptidase activity	0.0296552	YER094C,YFR050C,YHR024C,YHR027C,YOL038W,YOR157C,YOR362C	GO:0004175	7
Tubulin chaperone E binds microtubules and proteasomes and protects against misfolded protein stress.	5.08755e-08	YDL132W,YER094C,YFR050C,YGL048C,YHR027C,YOL038W,YOR157C,YOR362C	20204449	8
Arsenite interferes with protein folding and triggers formation of protein aggregates in yeast.	6.03607e-07	YER094C,YFR050C,YGL048C,YHR027C,YNL064C,YOL038W,YOR157C,YOR362C	22946053	8
The 26S proteasome of the yeast Saccharomyces cerevisiae.	6.19717e-07	YER094C,YFR050C,YGL048C,YHR027C,YOL038W,YOR157C,YOR362C	7957966	7
Proline- and arginine-rich peptides constitute a novel class of allosteric inhibitors of proteasome activity.	1.29101e-06	YER094C,YFR050C,YGL048C,YHR027C,YOL038W,YOR157C,YOR362C	12873125	7
Purification of proteasomes, proteasome subcomplexes, and proteasome-associated proteins from budding yeast.	1.29101e-06	YER094C,YFR050C,YGL048C,YHR027C,YOL038W,YOR157C,YOR362C	15917626	7
Regulation of the 26S proteasome complex during oxidative stress.	1.29101e-06	YER094C,YFR050C,YGL048C,YHR027C,YOL038W,YOR157C,YOR362C	21139140	7
Reversible 26S proteasome disassembly upon mitochondrial stress.	1.29101e-06	YER094C,YFR050C,YGL048C,YHR027C,YOL038W,YOR157C,YOR362C	24857655	7
Stability of the proteasome can be regulated allosterically through engagement of its proteolytic active sites.	1.62169e-06	YER094C,YFR050C,YGL048C,YHR027C,YOL038W,YOR157C,YOR362C	18026118	7
The role of proteosome-mediated proteolysis in modulating potentially harmful transcription factor activity in Saccharomyces cerevisiae.	1.62169e-06	YER094C,YFR050C,YGL048C,YHR027C,YOL038W,YOR157C,YOR362C	21685082	7
Proteasomal degradation from internal sites favors partial proteolysis via remote domain stabilization.	1.62169e-06	YER094C,YFR050C,YGL048C,YHR027C,YOL038W,YOR157C,YOR362C	21815694	7
Near-atomic resolution structural model of the yeast 26S proteasome.	2.02212e-06	YER094C,YFR050C,YGL048C,YHR027C,YOL038W,YOR157C,YOR362C	22927375	7
Knocking out ubiquitin proteasome system function in vivo and in vitro with genetically encodable tandem ubiquitin.	2.50411e-06	YER094C,YFR050C,YGL048C,YHR027C,YOL038W,YOR157C,YOR362C	16338349	7
An integrated mass spectrometry-based proteomic approach: quantitative analysis of tandem affinity-purified in vivo cross-linked protein complexes (QTAX) to decipher the 26 S proteasome-interacting network.	3.7674e-06	YER094C,YFR050C,YGL048C,YHR027C,YOL038W,YOR157C,YOR362C	16284124	7
Using native gel electrophoresis and phosphofluoroimaging to analyze GFP-tagged proteasomes.	3.7674e-06	YER094C,YFR050C,YGL048C,YHR027C,YOL038W,YOR157C,YOR362C	22350896	7
Mixed-linkage ubiquitin chains send mixed messages.	3.7674e-06	YER094C,YFR050C,YGL048C,YHR027C,YOL038W,YOR157C,YOR362C	23562397	7
Redox regulation of the proteasome via S-glutathionylation.	4.15339e-06	YER094C,YFR050C,YHR027C,YOL038W,YOR157C,YOR362C	24396728	6
Identification of a functional docking site in the Rpn1 LRR domain for the UBA-UBL domain protein Ddi1.	5.53824e-06	YER094C,YFR050C,YGL048C,YHR027C,YOL038W,YOR157C,YOR362C	21627799	7
Reversible cytoplasmic localization of the proteasome in quiescent yeast cells.	5.80012e-06	YFR050C,YGL048C,YHR027C,YOL038W,YOR157C,YOR362C	18504300	6
Proteasome activators.	5.80012e-06	YER094C,YFR050C,YGL048C,YOL038W,YOR157C,YOR362C	21211719	6
The catalytic activity of Ubp6 enhances maturation of the proteasomal regulatory particle.	6.66202e-06	YER094C,YFR050C,YGL048C,YHR027C,YOL038W,YOR157C,YOR362C	21658604	7
Structural defects in the regulatory particle-core particle interface of the proteasome induce a novel proteasome stress response.	9.50252e-06	YER094C,YFR050C,YGL048C,YHR027C,YOL038W,YOR157C,YOR362C	21878652	7
Docking of the proteasomal ATPases' carboxyl termini in the 20S proteasome's alpha ring opens the gate for substrate entry.	1.12728e-05	YER094C,YFR050C,YGL048C,YHR027C,YOL038W,YOR157C,YOR362C	17803938	7
[Biogenesis of the 26S proteasome in the yeast Saccharomyces cerevisiae].	1.56689e-05	YER094C,YFR050C,YGL048C,YHR027C,YOL038W,YOR157C,YOR362C	16922378	7
N-myristoylation of the Rpt2 subunit regulates intracellular localization of the yeast 26S proteasome.	1.56689e-05	YER094C,YFR050C,YGL048C,YHR027C,YOL038W,YOR157C,YOR362C	23102099	7
Structure of the 26S proteasome with ATP-γS bound provides insights into the mechanism of nucleotide-dependent substrate translocation.	1.56689e-05	YER094C,YFR050C,YGL048C,YHR027C,YOL038W,YOR157C,YOR362C	23589842	7
Toward a general chemical method for rapidly mapping multi-protein complexes.	1.83655e-05	YER094C,YFR050C,YGL048C,YHR027C,YOL038W,YOR157C,YOR362C	15253422	7
Polyubiquitin substrates allosterically activate their own degradation by the 26S proteasome.	1.83655e-05	YER094C,YFR050C,YGL048C,YHR027C,YOL038W,YOR157C,YOR362C	19169257	7
Structural basis for specific recognition of Rpt1p, an ATPase subunit of 26 S proteasome, by proteasome-dedicated chaperone Hsm3p.	1.83655e-05	YER094C,YFR050C,YGL048C,YHR027C,YOL038W,YOR157C,YOR362C	22334676	7
The N-terminal domain of Rpn4 serves as a portable ubiquitin-independent degron and is recognized by specific 19S RP subunits.	1.83655e-05	YER094C,YFR050C,YGL048C,YHR027C,YOL038W,YOR157C,YOR362C	22349505	7
Assembly and function of the proteasome.	1.83655e-05	YER094C,YFR050C,YGL048C,YHR027C,YOL038W,YOR157C,YOR362C	22350895	7
Proteasomes: Isolation and Activity Assays.	1.83655e-05	YER094C,YFR050C,YGL048C,YHR027C,YOL038W,YOR157C,YOR362C	26061243	7
Nuclear Import of Yeast Proteasomes.	2.14473e-05	YER094C,YFR050C,YGL048C,YHR027C,YOL038W,YOR157C,YOR362C	26262643	7
Proteasome dynamics between proliferation and quiescence stages of Saccharomyces cerevisiae.	2.89538e-05	YER094C,YFR050C,YGL048C,YHR027C,YOL038W,YOR157C,YOR362C	27677933	7
20 S proteasome from Saccharomyces cerevisiae is responsive to redox modifications and is S-glutathionylated.	4.60533e-05	YER094C,YFR050C,YOL038W,YOR157C,YOR362C	12409293	5
Molecular organization of the 20S proteasome gene family from Arabidopsis thaliana.	4.60533e-05	YER094C,YFR050C,YOL038W,YOR157C,YOR362C	9611183	5
Nuclear transport of yeast proteasomes.	5.81108e-05	YER094C,YFR050C,YGL048C,YHR027C,YOL038W,YOR157C,YOR362C	25333764	7
Substrate selection by the proteasome during degradation of protein complexes.	6.20435e-05	YER094C,YFR050C,YHR027C,YOL038W,YOR157C,YOR362C	19029916	6
Identical subunit topographies of human and yeast 20S proteasomes.	7.14533e-05	YER094C,YFR050C,YOL038W,YOR157C,YOR362C	10068451	5
An algorithm for the prediction of proteasomal cleavages.	7.14533e-05	YER094C,YFR050C,YOL038W,YOR157C,YOR362C	10772860	5
The 26S proteasome: a molecular machine designed for controlled proteolysis.	7.14533e-05	YER094C,YFR050C,YOL038W,YOR157C,YOR362C	10872471	5
Structural basis for the activation of 20S proteasomes by 11S regulators.	7.14533e-05	YER094C,YFR050C,YOL038W,YOR157C,YOR362C	11081519	5
Crystal structure of the 20 S proteasome:TMC-95A complex: a non-covalent proteasome inhibitor.	7.14533e-05	YER094C,YFR050C,YOL038W,YOR157C,YOR362C	11493007	5
The pore of activated 20S proteasomes has an ordered 7-fold symmetric conformation.	7.14533e-05	YER094C,YFR050C,YOL038W,YOR157C,YOR362C	12941688	5
Fully automated online multi-dimensional protein profiling system for complex mixtures.	7.14533e-05	YER094C,YFR050C,YOL038W,YOR157C,YOR362C	15584229	5
Purification, crystallization, and X-ray analysis of the yeast 20S proteasome.	7.14533e-05	YER094C,YFR050C,YOL038W,YOR157C,YOR362C	16275340	5
Crystal structure of the boronic acid-based proteasome inhibitor bortezomib in complex with the yeast 20S proteasome.	7.14533e-05	YER094C,YFR050C,YOL038W,YOR157C,YOR362C	16531229	5
Inhibitor-binding mode of homobelactosin C to proteasomes: new insights into class I MHC ligand generation.	7.14533e-05	YER094C,YFR050C,YOL038W,YOR157C,YOR362C	16537370	5
Proteasomes can degrade a significant proportion of cellular proteins independent of ubiquitination.	7.14533e-05	YER094C,YFR050C,YOL038W,YOR157C,YOR362C	19162040	5
Snapshots of the fluorosalinosporamide/20S complex offer mechanistic insights for fine tuning proteasome inhibition.	7.14533e-05	YER094C,YFR050C,YOL038W,YOR157C,YOR362C	19678642	5
A tetrahedral transition state at the active sites of the 20S proteasome is coupled to opening of the alpha-ring channel.	7.14533e-05	YER094C,YFR050C,YOL038W,YOR157C,YOR362C	19679091	5
Structural models for interactions between the 20S proteasome and its PAN/19S activators.	7.14533e-05	YER094C,YFR050C,YOL038W,YOR157C,YOR362C	19889631	5
Monitoring cytoplasmic protein complexes with blue native gel electrophoresis and stable isotope labelling with amino acids in cell culture: analysis of changes in the 20S proteasome.	7.14533e-05	YER094C,YFR050C,YOL038W,YOR157C,YOR362C	21710547	5
Redox control of 20S proteasome gating.	7.14533e-05	YER094C,YFR050C,YOL038W,YOR157C,YOR362C	22229461	5
Driving forces of proteasome-catalyzed peptide splicing in yeast and humans.	7.14533e-05	YER094C,YFR050C,YOL038W,YOR157C,YOR362C	22822185	5
Interactions of the natural product kendomycin and the 20S proteasome.	7.14533e-05	YER094C,YFR050C,YOL038W,YOR157C,YOR362C	25038530	5
A mass spectrometry platform for a streamlined investigation of proteasome integrity, posttranslational modifications, and inhibitor binding.	7.14533e-05	YER094C,YFR050C,YOL038W,YOR157C,YOR362C	25728267	5
Systematic Analyses of Substrate Preferences of 20S Proteasomes Using Peptidic Epoxyketone Inhibitors.	7.14533e-05	YER094C,YFR050C,YOL038W,YOR157C,YOR362C	26020686	5
The insulin-degrading enzyme is an allosteric modulator of the 20S proteasome and a potential competitor of the 19S.	7.14533e-05	YER094C,YFR050C,YOL038W,YOR157C,YOR362C	29594388	5
(-)-Homosalinosporamide A and Its Mode of Proteasome Inhibition: An X-ray Crystallographic Study.	7.14533e-05	YER094C,YFR050C,YOL038W,YOR157C,YOR362C	30029468	5
Studies on the yeast proteasome uncover its basic structural features and multiple in vivo functions.	7.14533e-05	YER094C,YFR050C,YOL038W,YOR157C,YOR362C	7697119	5
The proteasome and protein degradation in yeast.	7.14533e-05	YER094C,YFR050C,YOL038W,YOR157C,YOR362C	8861011	5
Potential immunocompetence of proteolytic fragments produced by proteasomes before evolution of the vertebrate immune system.	7.14533e-05	YER094C,YFR050C,YOL038W,YOR157C,YOR362C	9221750	5
Three decades of studies to understand the functions of the ubiquitin family.	9.67125e-05	YER094C,YFR050C,YGL048C,YHR027C,YOL038W,YOR157C,YOR362C	22350874	7
Intrinsic nucleoside diphosphate kinase-like activity is a novel function of the 20 S proteasome.	0.000106872	YER094C,YFR050C,YOL038W,YOR157C,YOR362C	10567415	5
Selective degradation of ubiquitinated Sic1 by purified 26S proteasome yields active S phase cyclin-Cdk.	0.000106872	YER094C,YFR050C,YOL038W,YOR157C,YOR362C	11545745	5
Simultaneous fluorescent monitoring of proteasomal subunit catalysis.	0.000106872	YER094C,YFR050C,YOL038W,YOR157C,YOR362C	20078037	5
Structure of a Blm10 complex reveals common mechanisms for proteasome binding and gate opening.	0.000106872	YER094C,YFR050C,YOL038W,YOR157C,YOR362C	20227375	5
Atomic force microscopy of proteasome assemblies.	0.000106872	YER094C,YFR050C,YOL038W,YOR157C,YOR362C	21660725	5
Immuno- and constitutive proteasome crystal structures reveal differences in substrate and inhibitor specificity.	0.000106872	YER094C,YFR050C,YOL038W,YOR157C,YOR362C	22341445	5
Analysing properties of proteasome inhibitors using kinetic and X-ray crystallographic studies.	0.000106872	YER094C,YFR050C,YOL038W,YOR157C,YOR362C	22350899	5
Peptides that activate the 20S proteasome by gate opening increased oxidized protein removal and reduced protein aggregation.	0.000106872	YER094C,YFR050C,YOL038W,YOR157C,YOR362C	24291399	5
Crystal structure of a low molecular weight activator Blm-pep with yeast 20S proteasome - insights into the enzyme activation mechanism.	0.000106872	YER094C,YFR050C,YOL038W,YOR157C,YOR362C	28733623	5
Structure of 20S proteasome from yeast at 2.4 A resolution.	0.000106872	YER094C,YFR050C,YOL038W,YOR157C,YOR362C	9087403	5
Co- and post-translational modifications of the 26S proteasome in yeast.	0.000114811	YER094C,YGL048C,YHR027C,YOL038W,YOR157C,YOR362C	20486117	6
Ubiquitinated proteins activate the proteasomal ATPases by binding to Usp14 or Uch37 homologs.	0.000114811	YER094C,YFR050C,YHR027C,YOL038W,YOR157C,YOR362C	23341450	6
Nucleotide excision repair in chromatin: the shape of things to come.	0.000123057	YER094C,YFR050C,YGL048C,YHR027C,YOL038W,YOR157C,YOR362C	15905137	7
Genomic evolution of the proteasome system among hemiascomycetous yeasts.	0.00013906	YER094C,YFR050C,YGL048C,YHR027C,YOL038W,YOR362C	17909694	6
Dependence of proteasome processing rate on substrate unfolding.	0.00013906	YER094C,YFR050C,YHR027C,YOL038W,YOR157C,YOR362C	21454622	6
20 S proteasomes are imported as precursor complexes into the nucleus of yeast.	0.000155025	YER094C,YFR050C,YOL038W,YOR157C,YOR362C	11922673	5
Transcriptional regulation by the proteasome as a mechanism for cellular protein homeostasis.	0.000155025	YER094C,YFR050C,YOL038W,YOR157C,YOR362C	16861887	5
Pba3-Pba4 heterodimer acts as a molecular matchmaker in proteasome α-ring formation.	0.000155025	YER094C,YFR050C,YOL038W,YOR157C,YOR362C	24996173	5
Synthetic lethality of rpn11-1 rpn10Δ is linked to altered proteasome assembly and activity.	0.000167402	YER094C,YFR050C,YHR027C,YOL038W,YOR157C,YOR362C	20941496	6
Oxidative stress-mediated regulation of proteasome complexes.	0.000167402	YER094C,YFR050C,YHR027C,YOL038W,YOR157C,YOR362C	21543789	6
Role of glutaredoxin 2 and cytosolic thioredoxins in cysteinyl-based redox modification of the 20S proteasome.	0.000219048	YER094C,YFR050C,YOL038W,YOR157C,YOR362C	18435761	5
Nascent peptide-dependent translation arrest leads to Not4p-mediated protein degradation by the proteasome.	0.000219048	YER094C,YFR050C,YOL038W,YOR157C,YOR362C	19204001	5
The hydrophobic patch of ubiquitin is required to protect transactivator-promoter complexes from destabilization by the proteasomal ATPases.	0.000219048	YER094C,YFR050C,YOL038W,YOR157C,YOR362C	19939937	5
Aging and calorie restriction modulate yeast redox state, oxidized protein removal, and the ubiquitin-proteasome system.	0.000302517	YER094C,YFR050C,YOL038W,YOR157C,YOR362C	21684330	5
beta-Subunit appendages promote 20S proteasome assembly by overcoming an Ump1-dependent checkpoint.	0.000409513	YER094C,YFR050C,YOL038W,YOR157C,YOR362C	17431397	5
Macyranones: Structure, Biosynthesis, and Binding Mode of an Unprecedented Epoxyketone that Targets the 20S Proteasome.	0.000544627	YER094C,YFR050C,YOL038W,YOR157C,YOR362C	26050527	5
Protein Quality Control of the Endoplasmic Reticulum and Ubiquitin-Proteasome-Triggered Degradation of Aberrant Proteins: Yeast Pioneers the Path.	0.00110987	YER094C,YFR050C,YGL048C,YHR027C,YOL038W,YOR157C,YOR362C	29394096	7
Proteasome inhibition alters the transcription of multiple yeast genes.	0.00227576	YER094C,YFR050C,YOL038W,YOR157C,YOR362C	15451170	5
Bivalency as a principle for proteasome inhibition.	0.00278587	YER094C,YFR050C,YOL038W,YOR157C,YOR362C	10318898	5
Substrate recognition in selective autophagy and the ubiquitin-proteasome system.	0.00592602	YER094C,YFR050C,YHR027C,YOL038W,YOR157C,YOR362C	23545414	6
The exosome and the proteasome: nano-compartments for degradation.	0.00686139	YER094C,YFR050C,YOL038W,YOR157C,YOR362C	16713559	5
Inhibition of human and yeast 20S proteasome by analogues of trypsin inhibitor SFTI-1.	0.00802957	YFR050C,YOL038W,YOR157C,YOR362C	24586798	4
Activation of heat shock and antioxidant responses by the natural product celastrol: transcriptional signatures of a thiol-targeted molecule.	0.010832	YER094C,YFR050C,YGL048C,YHR027C,YOL038W,YOR157C,YOR362C	18199679	7
Proteasome assembly from 15S precursors involves major conformational changes and recycling of the Pba1-Pba2 chaperone.	0.015251	YER094C,YOL038W,YOR157C,YOR362C	25609009	4
The proteasome: a proteolytic nanomachine of cell regulation and waste disposal.	0.019271	YFR050C,YGL048C,YHR027C,YOL038W,YOR362C	15571806	5
Fub1p, a novel protein isolated by boundary screening, binds the proteasome complex.	0.0264558	YFR050C,YGL048C,YHR027C,YOL038W	22362029	4
Proteasome beta-type subunits: unequal roles of propeptides in core particle maturation and a hierarchy of active site function.	0.0345069	YER094C,YFR050C,YOR157C	10452902	3
Role of C-terminal extensions of subunits beta2 and beta7 in assembly and activity of eukaryotic proteasomes.	0.0345069	YER094C,YFR050C,YOR157C	14722099	3
Cluster_5
cell division	0.015746	YAL024C,YDR054C,YDR182W,YFL039C,YGR092W,YGR113W,YHR030C,YIL106W,YLR190W	GO:0051301	9
intracellular signal transduction	0.0433869	YAL024C,YDR389W,YGL073W,YGR092W,YHR030C,YMR028W,YOR057W,YOR089C	GO:0035556	8
Cluster_6
mating projection tip	0.0403921	YAL041W,YBL007C,YBL016W,YBL047C,YBR200W,YCR002C,YDL240W,YGL233W,YOR181W,YOR326W	GO:0043332	10
cellular bud neck	0.0421164	YAL041W,YAR019C,YBL007C,YBL047C,YBR160W,YBR200W,YCR002C,YDL240W,YFL039C,YGL233W,YKL048C,YKR048C,YOR326W	GO:0005935	13
A comprehensive strategy enabling high-resolution functional analysis of the yeast genome.	0.0161825	YAL041W,YAR019C,YBL041W,YBR135W,YBR160W,YCL052C,YDL014W,YDR050C,YDR212W,YDR238C,YDR331W,YGL022W,YGL044C,YGL233W,YGR091W,YIL118W,YIR010W,YJL097W,YJR057W,YJR112W,YLR197W,YLR347C,YML023C,YMR117C,YNL061W,YNL102W,YNR003C,YOL102C,YOL123W,YOR004W,YOR181W,YOR326W,YPL160W,YPR016C	18622397	34
Regulation of mating in the cell cycle of Saccharomyces cerevisiae.	0.0167596	YAL041W,YAR019C,YBR160W,YCR002C,YJR057W,YNL102W	400872	6
Cell cycle entry triggers a switch between two modes of Cdc42 activation during yeast polarization.	0.0223812	YAL041W,YBR160W,YBR200W,YFL039C	28682236	4
Genetic control of the cell division cycle in yeast.	0.0241787	YAL041W,YAR019C,YBR160W,YCR002C,YJR057W,YNL102W	4587263	6
Are mitotic functions required in meiosis?	0.0340958	YAL041W,YAR019C,YBR160W,YCR002C,YJR057W,YNL102W	4599956	6
Cluster_7
A comprehensive strategy enabling high-resolution functional analysis of the yeast genome.	0.0105584	YBR160W,YDL126C,YDR052C,YDR060W,YFR052W,YGL065C,YGR116W,YHR166C,YJR072C,YJR076C,YMR005W,YMR049C,YMR239C,YNR043W,YOL004W,YOL123W,YPL010W,YPL043W,YPL063W,YPL209C,YPL266W,YPR103W,YPR133C,YPR161C	18622397	24
Cluster_8
phosphatidylcholine biosynthetic process	0.0376965	YDR207C,YGR157W,YJR073C	GO:0006656	3
phosphatidylethanolamine N-methyltransferase activity	0.00957432	YGR157W,YJR073C	GO:0004608	2
Physical map locations of the phospholipid biosynthetic structural and regulatory genes of Saccharomyces cerevisiae.	0.00338828	YDR207C,YGR157W,YJR073C	7732728	3
The yeast UME6 gene is required for both negative and positive transcriptional regulation of phospholipid biosynthetic gene expression.	0.0118343	YDR207C,YGR157W,YJR073C	8614637	3
Combinatorial regulation of phospholipid biosynthetic gene expression by the UME6, SIN3 and RPD3 genes.	0.018915	YDR207C,YGR157W,YJR073C	10931932	3
Cluster_9
core mediator complex	0.000844977	YBR193C,YGL127C,YNR010W,YPR070W	GO:0070847	4
mediator complex	0.00300357	YBR193C,YGL127C,YNR010W,YPR070W	GO:0016592	4
RNA polymerase II transcription factor complex	0.00554102	YBR193C,YDR392W,YGL127C,YNR010W,YPR070W	GO:0090575	5
nuclear transcription factor complex	0.0146371	YBR193C,YDR392W,YGL127C,YNR010W,YPR070W	GO:0044798	5
transcription factor complex	0.0205022	YBR193C,YDR392W,YGL127C,YNR010W,YPR070W	GO:0005667	5
transcription coregulator activity	0.038728	YBR193C,YDR392W,YGL127C,YNR010W,YPR070W	GO:0003712	5
Identification, structure, and functional requirement of the Mediator submodule Med7N/31.	0.000334603	YBR193C,YGL043W,YGL127C,YNR010W,YPR070W	19057509	5
The basal initiation machinery: beyond the general transcription factors.	0.0312882	YBR193C,YDR392W,YGL043W,YGL127C,YNR010W,YPR070W	19411170	6
Mediator is an intrinsic component of the basal RNA polymerase II machinery in vivo.	0.0456679	YBR193C,YGL127C,YNR010W,YPR070W	23963697	4
Redefining the modular organization of the core Mediator complex.	0.0456679	YBR193C,YGL127C,YNR010W,YPR070W	24810298	4
The T body, a new cytoplasmic RNA granule in Saccharomyces cerevisiae.	0.0459272	YDR392W,YGL043W,YGL127C,YNR010W,YPR070W	18678648	5
Cluster_10
DNA replication initiation	0.00967835	YBR060C,YBR202W,YGL113W,YIL150C,YML065W	GO:0006270	5
central plaque of spindle pole body	0.00120774	YBR109C,YKL042W,YPL255W	GO:0005823	3
DNA replication preinitiation complex	0.00148992	YBR060C,YBR202W,YGL113W,YML065W	GO:0031261	4
protein-DNA complex	0.00466831	YBR060C,YBR202W,YGL113W,YKR062W,YML065W	GO:0032993	5
nucleoplasm	0.0127752	YBR060C,YBR202W,YGL113W,YHR058C,YKR062W,YLR115W,YML065W,YMR223W	GO:0005654	8
nuclear pre-replicative complex	0.0397408	YBR060C,YBR202W,YML065W	GO:0005656	3
pre-replicative complex	0.0397408	YBR060C,YBR202W,YML065W	GO:0036387	3
DNA replication origin binding	0.0255602	YBR060C,YBR202W,YIL150C,YML065W	GO:0003688	4
Why are we where we are? Understanding replication origins and initiation sites in eukaryotes using ChIP-approaches.	0.000590956	YBR060C,YBR202W,YGL113W,YIL150C,YML065W	19904620	5
Initiation of DNA replication: functional and evolutionary aspects.	0.0018873	YBR060C,YBR202W,YGL113W,YIL150C,YML065W	21508040	5
Regulation of the initiation of DNA replication in human cells.	0.0018873	YBR060C,YBR202W,YGL113W,YIL150C,YML065W	30266203	5
Regulating DNA replication in eukarya.	0.0056942	YBR060C,YBR202W,YGL113W,YIL150C,YML065W	23838438	5
Enigmatic variations: divergent modes of regulating eukaryotic DNA replication.	0.00911285	YBR060C,YBR202W,YGL113W,YIL150C,YML065W	14636567	5
Nuclear organization of DNA replication initiation proteins in mammalian cells.	0.0124903	YBR060C,YBR202W,YML065W	11779870	3
Evolutionary diversification of eukaryotic DNA replication machinery.	0.0139878	YBR060C,YBR202W,YGL113W,YIL150C,YML065W	22918578	5
Differences in the DNA replication of unicellular eukaryotes and metazoans: known unknowns.	0.018248	YBR060C,YBR202W,YGL113W,YIL150C,YML065W	20203697	5
Comparative analysis of the molecular mechanisms controlling the initiation of chromosomal DNA replication in yeast and in mammalian cells.	0.018248	YBR060C,YBR202W,YGL113W,YIL150C,YML065W	21963686	5
DNA replication licensing.	0.0463085	YBR060C,YBR202W,YGL113W,YML065W	15353274	4
Origin plasticity during budding yeast DNA replication in vitro.	0.0463085	YBR060C,YBR202W,YGL113W,YML065W	24566988	4
Cluster_11
transcription by RNA polymerase II	0.00321568	YBL021C,YBR095C,YCR081W,YDL108W,YDL140C,YDR081C,YDR123C,YDR228C,YDR311W,YDR460W,YDR463W,YER148W,YER171W,YHL025W,YIL084C,YIR023W,YKL018W,YKL062W,YKL112W,YLR005W,YLR071C,YLR430W,YML069W,YMR039C,YMR112C,YNL076W,YOL001W,YOR151C,YOR174W,YPR023C,YPR034W,YPR086W	GO:0006366	32
histidine biosynthetic process	0.00831525	YBR248C,YCL030C,YER055C,YFR025C,YIL116W	GO:0000105	5
histidine metabolic process	0.00831525	YBR248C,YCL030C,YER055C,YFR025C,YIL116W	GO:0006547	5
imidazole-containing compound metabolic process	0.00831525	YBR248C,YCL030C,YER055C,YFR025C,YIL116W	GO:0052803	5
protein-containing complex	1.40136e-05	YAL041W,YBL021C,YBL025W,YBL034C,YBR095C,YBR238C,YBR247C,YBR257W,YCL044C,YCR071C,YCR081W,YDL008W,YDL013W,YDL061C,YDL108W,YDL140C,YDR123C,YDR172W,YDR228C,YDR280W,YDR311W,YDR364C,YDR460W,YER092W,YER093C,YER148W,YER157W,YER171W,YGL211W,YGR216C,YGR264C,YHL025W,YHR186C,YIL061C,YIL076W,YIL084C,YIL109C,YJL050W,YJL136C,YJL204C,YJR076C,YJR090C,YKL018W,YKL052C,YKL112W,YKL172W,YKL196C,YKR037C,YKR083C,YKR086W…	GO:0032991	80
transcription factor complex	4.88396e-05	YBL021C,YBL025W,YDL108W,YDR123C,YDR311W,YDR460W,YER148W,YER171W,YLR005W,YLR071C,YMR039C,YMR112C,YOR174W	GO:0005667	13
nuclear transcription factor complex	0.000187739	YBL021C,YBL025W,YDL108W,YDR123C,YDR311W,YDR460W,YER148W,YER171W,YLR005W,YLR071C,YMR112C,YOR174W	GO:0044798	12
RNA polymerase II transcription factor complex	0.000198354	YBL021C,YDL108W,YDR123C,YDR311W,YDR460W,YER148W,YER171W,YLR005W,YLR071C,YMR112C,YOR174W	GO:0090575	11
nuclear lumen	0.000631531	YBL025W,YBL034C,YBR095C,YBR142W,YBR247C,YBR257W,YCR081W,YDL013W,YDL108W,YDL140C,YDR228C,YDR280W,YDR311W,YDR364C,YDR460W,YER092W,YER148W,YER171W,YHL025W,YHR164C,YIL084C,YJL050W,YKL018W,YKL052C,YKL172W,YKR024C,YKR037C,YKR083C,YLL050C,YLR005W,YLR071C,YLR086W,YML069W,YMR112C,YNL061W,YOL021C,YOR001W,YOR151C,YOR174W,YPL204W,YPR023C,YPR034W	GO:0031981	42
intracellular organelle part	0.000682935	YBL021C,YBL025W,YBL034C,YBL105C,YBR036C,YBR095C,YBR142W,YBR238C,YBR247C,YBR257W,YCL044C,YCR071C,YCR081W,YDL008W,YDL013W,YDL061C,YDL108W,YDL140C,YDR123C,YDR228C,YDR280W,YDR311W,YDR364C,YDR375C,YDR460W,YER092W,YER093C,YER148W,YER157W,YER171W,YGL160W,YGR143W,YGR216C,YHL025W,YHR164C,YHR186C,YIL061C,YIL076W,YIL084C,YIL109C,YJL050W,YJL071W,YJL136C,YJR076C,YJR090C,YJR117W,YKL018W,YKL052C,YKL112W,YKL165C…	GO:0044446	95
organelle part	0.000806225	YBL021C,YBL025W,YBL034C,YBL105C,YBR036C,YBR095C,YBR142W,YBR238C,YBR247C,YBR257W,YCL044C,YCR071C,YCR081W,YDL008W,YDL013W,YDL061C,YDL108W,YDL140C,YDR123C,YDR228C,YDR280W,YDR311W,YDR364C,YDR375C,YDR460W,YER092W,YER093C,YER148W,YER157W,YER171W,YGL160W,YGR143W,YGR216C,YHL025W,YHR164C,YHR186C,YIL061C,YIL076W,YIL084C,YIL109C,YJL050W,YJL071W,YJL136C,YJR076C,YJR090C,YJR117W,YKL018W,YKL052C,YKL112W,YKL165C…	GO:0044422	95
nuclear part	0.00160051	YBL021C,YBL025W,YBL034C,YBR095C,YBR142W,YBR247C,YBR257W,YCR081W,YDL008W,YDL013W,YDL108W,YDL140C,YDR123C,YDR228C,YDR280W,YDR311W,YDR364C,YDR460W,YER092W,YER148W,YER171W,YHL025W,YHR164C,YIL061C,YIL084C,YJL050W,YJR117W,YKL018W,YKL052C,YKL112W,YKL172W,YKR024C,YKR037C,YKR083C,YKR086W,YLL050C,YLR005W,YLR071C,YLR086W,YLR127C,YML069W,YMR112C,YMR240C,YNL061W,YOL021C,YOR001W,YOR151C,YOR174W,YOR249C,YPL204W…	GO:0044428	52
transcription factor TFIIH holo complex	0.00317902	YDL108W,YDR311W,YDR460W,YER171W,YLR005W	GO:0005675	5
membrane-enclosed lumen	0.00332101	YBL025W,YBL034C,YBR095C,YBR142W,YBR247C,YBR257W,YCR071C,YCR081W,YDL013W,YDL108W,YDL140C,YDR228C,YDR280W,YDR311W,YDR364C,YDR460W,YER092W,YER148W,YER171W,YHL025W,YHR164C,YIL084C,YJL050W,YJL071W,YKL018W,YKL052C,YKL172W,YKR024C,YKR037C,YKR083C,YLL050C,YLR005W,YLR056W,YLR071C,YLR086W,YLR089C,YML069W,YMR112C,YNL061W,YNL117W,YNR020C,YOL021C,YOR001W,YOR151C,YOR174W,YOR232W,YPL135W,YPL204W,YPR023C,YPR034W	GO:0031974	50
organelle lumen	0.00332101	YBL025W,YBL034C,YBR095C,YBR142W,YBR247C,YBR257W,YCR071C,YCR081W,YDL013W,YDL108W,YDL140C,YDR228C,YDR280W,YDR311W,YDR364C,YDR460W,YER092W,YER148W,YER171W,YHL025W,YHR164C,YIL084C,YJL050W,YJL071W,YKL018W,YKL052C,YKL172W,YKR024C,YKR037C,YKR083C,YLL050C,YLR005W,YLR056W,YLR071C,YLR086W,YLR089C,YML069W,YMR112C,YNL061W,YNL117W,YNR020C,YOL021C,YOR001W,YOR151C,YOR174W,YOR232W,YPL135W,YPL204W,YPR023C,YPR034W	GO:0043233	50
intracellular organelle lumen	0.00332101	YBL025W,YBL034C,YBR095C,YBR142W,YBR247C,YBR257W,YCR071C,YCR081W,YDL013W,YDL108W,YDL140C,YDR228C,YDR280W,YDR311W,YDR364C,YDR460W,YER092W,YER148W,YER171W,YHL025W,YHR164C,YIL084C,YJL050W,YJL071W,YKL018W,YKL052C,YKL172W,YKR024C,YKR037C,YKR083C,YLL050C,YLR005W,YLR056W,YLR071C,YLR086W,YLR089C,YML069W,YMR112C,YNL061W,YNL117W,YNR020C,YOL021C,YOR001W,YOR151C,YOR174W,YOR232W,YPL135W,YPL204W,YPR023C,YPR034W	GO:0070013	50
nucleoplasm part	0.00424396	YBR095C,YCR081W,YDL108W,YDL140C,YDR228C,YDR311W,YDR460W,YER148W,YER171W,YIL084C,YKL018W,YLR005W,YLR071C,YML069W,YMR112C,YOR151C,YOR174W,YPR023C	GO:0044451	18
nucleoplasm	0.00798453	YBR095C,YCR081W,YDL108W,YDL140C,YDR228C,YDR311W,YDR460W,YER148W,YER171W,YIL084C,YKL018W,YLR005W,YLR071C,YML069W,YMR112C,YOR151C,YOR174W,YPL204W,YPR023C	GO:0005654	19
carboxy-terminal domain protein kinase complex	0.0162706	YDL108W,YDR311W,YDR460W,YER171W,YLR005W	GO:0032806	5
RNA polymerase II, holoenzyme	0.0175345	YDL108W,YDL140C,YDR311W,YDR460W,YER148W,YER171W,YLR005W,YOR151C	GO:0016591	8
intracellular membrane-bounded organelle	0.0285784	YAL041W,YBL021C,YBL025W,YBL034C,YBL105C,YBR036C,YBR095C,YBR142W,YBR238C,YBR247C,YBR257W,YCL044C,YCR071C,YCR081W,YDL008W,YDL013W,YDL108W,YDL140C,YDR081C,YDR123C,YDR182W,YDR228C,YDR280W,YDR311W,YDR364C,YDR375C,YDR460W,YDR463W,YER092W,YER093C,YER148W,YER157W,YER171W,YGL160W,YGL211W,YGL236C,YGR143W,YGR216C,YHL025W,YHR007C,YHR146W,YHR164C,YHR186C,YHR189W,YIL061C,YIL076W,YIL084C,YIL109C,YIR023W,YIR034C…	GO:0043231	116
A comprehensive strategy enabling high-resolution functional analysis of the yeast genome.	6.18578e-10	YAL041W,YBL105C,YBR142W,YBR247C,YBR257W,YDL008W,YDL108W,YDL140C,YDR164C,YDR172W,YDR182W,YDR228C,YDR311W,YDR460W,YGR264C,YHR007C,YHR164C,YHR186C,YIL061C,YJL050W,YJR076C,YKL052C,YKL112W,YKL165C,YKR037C,YKR083C,YLL050C,YLR005W,YLR071C,YLR086W,YLR127C,YLR430W,YML069W,YMR197C,YMR240C,YNL061W,YNR017W,YNR026C,YOL021C,YOR103C,YOR151C,YOR174W,YOR181W,YOR204W,YOR232W,YOR249C,YPL028W,YPL094C,YPR023C,YPR034W…	18622397	51
Structure of a Complete Mediator-RNA Polymerase II Pre-Initiation Complex.	4.31345e-06	YDL108W,YDR311W,YDR460W,YER148W,YER171W,YLR005W,YLR071C,YMR112C,YOR151C,YOR174W,YPR086W	27610567	11
Promoter activation when the ChIPs are down.	2.11741e-05	YCR081W,YDL108W,YDL140C,YDR311W,YDR460W,YER148W,YER171W,YJL136C,YLR005W,YLR071C,YMR112C,YOR174W	16462809	12
Recent structural insights into transcription preinitiation complexes.	6.89519e-05	YCR081W,YDL108W,YDL140C,YDR311W,YDR460W,YER171W,YLR005W,YLR071C,YMR112C,YOR151C,YOR174W	11082032	11
The transcription elongation factor TFIIS is a component of RNA polymerase II preinitiation complexes.	0.000182215	YCL030C,YCR081W,YDL108W,YDL140C,YER171W,YLR071C,YOR151C,YOR174W,YPR086W	17913884	9
General initiation factors for RNA polymerase II.	0.000182215	YDL108W,YDL140C,YDR311W,YDR460W,YER148W,YER171W,YLR005W,YOR151C,YPR086W	8352588	9
The synthetic genetic interaction spectrum of essential genes.	0.000227533	YBL034C,YBR142W,YBR257W,YDL008W,YDR164C,YDR311W,YDR364C,YER093C,YER171W,YGR216C,YGR264C,YHR007C,YKL052C,YKL165C,YKR037C,YKR086W,YML069W,YNL061W,YNR026C,YOR103C,YOR181W,YPR034W,YPR086W	16155567	23
Mechanisms of transcriptional activation in vivo: two steps forward.	0.000453027	YDL108W,YDL140C,YDR311W,YDR460W,YER148W,YER171W,YLR005W,YLR071C,YOR151C,YPR086W	8783941	10
Structure of an RNA polymerase II preinitiation complex.	0.000570222	YDL108W,YDR311W,YDR460W,YER148W,YER171W,YLR005W,YMR039C,YPR086W	26483468	8
A minimal set of RNA polymerase II transcription protein interactions.	0.00117322	YDL108W,YDL140C,YDR311W,YDR460W,YER171W,YLR005W,YOR151C,YPR086W	8702741	8
CTD kinase associated with yeast RNA polymerase II initiation factor b.	0.00131641	YDL108W,YDL140C,YDR311W,YDR460W,YER171W,YLR005W	1836979	6
Mediator-dependent recruitment of TFIIH modules in preinitiation complex.	0.00131641	YDL108W,YDL140C,YER148W,YER171W,YLR005W,YMR112C	18691966	6
Hyperphosphorylation of the C-terminal repeat domain of RNA polymerase II facilitates dissociation of its complex with mediator.	0.00138445	YCR081W,YDL108W,YDL140C,YDR311W,YDR460W,YER171W,YLR005W,YLR071C,YOR151C,YOR174W	17376774	10
The Transition of Poised RNA Polymerase II to an Actively Elongating State Is a "Complex" Affair.	0.00147587	YCR081W,YDL108W,YDL140C,YDR311W,YDR460W,YER148W,YER171W,YHL025W,YLR005W,YOR151C,YPR034W	22567346	11
Promoter Distortion and Opening in the RNA Polymerase II Cleft.	0.0022607	YDL140C,YDR311W,YDR460W,YER148W,YER171W,YLR005W,YOR151C,YPR086W	30472190	8
Unraveling framework of the ancestral Mediator complex in human diseases.	0.00245286	YCR081W,YDL140C,YDR311W,YER148W,YER171W,YLR005W,YLR071C,YMR112C,YOR151C,YOR174W,YPR086W	21983542	11
Molecular genetics of the RNA polymerase II general transcriptional machinery.	0.00258841	YCR081W,YDL108W,YDL140C,YDR311W,YDR460W,YER148W,YER171W,YLR005W,YLR071C,YOR151C,YOR174W,YPR086W	9618449	12
TFIIH plays an essential role in RNA polymerase I transcription.	0.0025918	YDL108W,YDL140C,YDR311W,YDR460W,YER171W,YLR005W	12015980	6
Phosphorylation of the yeast Rpb1 C-terminal domain at serines 2, 5, and 7.	0.0025918	YDL108W,YDL140C,YDR311W,YDR460W,YER171W,YLR005W	19679665	6
Resolution of factors required for the initiation of transcription by yeast RNA polymerase II.	0.0025918	YDL108W,YDR311W,YDR460W,YER148W,YER171W,YLR005W	2193032	6
Functional correlation among Gal11, transcription factor (TF) IIE, and TFIIH in Saccharomyces cerevisiae. Gal11 and TFIIE cooperatively enhance TFIIH-mediated phosphorylation of RNA polymerase II carboxyl-terminal domain sequences.	0.0025918	YDL108W,YDL140C,YDR311W,YDR460W,YER171W,YLR005W	9545282	6
Architecture of an RNA polymerase II transcription pre-initiation complex.	0.00307226	YDL140C,YDR311W,YDR460W,YER148W,YER171W,YLR005W,YOR151C,YPR086W	24072820	8
Real-time observation of the initiation of RNA polymerase II transcription.	0.00307226	YDL140C,YDR311W,YER148W,YER171W,YLR005W,YMR039C,YOR151C,YPR086W	26331540	8
GENE-ENZYME RELATIONS IN HISTIDINE BIOSYNTHESIS IN YEAST.	0.00344198	YBR248C,YCL030C,YER055C,YFR025C,YIL116W	14190241	5
Cloning and disruption of the Pichia pastoris ARG1, ARG2, ARG3, HIS1, HIS2, HIS5, HIS6 genes and their use as auxotrophic markers.	0.00344198	YER055C,YFR025C,YIL116W,YJL071W,YJL088W	15789348	5
Histidine biosynthetic pathway and genes: structure, regulation, and evolution.	0.00344198	YBR248C,YCL030C,YER055C,YFR025C,YIL116W	8852895	5
The basal initiation machinery: beyond the general transcription factors.	0.00391613	YDL108W,YDL140C,YDR311W,YDR460W,YER148W,YER171W,YLR005W,YLR071C,YMR112C,YOR151C,YOR174W,YPR086W	19411170	12
TFIIH kinase places bivalent marks on the carboxy-terminal domain of RNA polymerase II.	0.00473816	YDL108W,YDL140C,YDR311W,YDR460W,YER171W,YLR005W	19450536	6
RNA polymerase II holoenzymes and subcomplexes.	0.0071767	YCR081W,YDL108W,YDL140C,YDR311W,YDR460W,YER171W,YLR005W,YOR151C	9774381	8
Functional interplay between Mediator and TFIIB in preinitiation complex assembly in relation to promoter architecture.	0.00816318	YDL108W,YDL140C,YER148W,YER171W,YLR071C,YPR086W	27688401	6
Toxicity of copper, cobalt, and nickel salts is dependent on histidine metabolism in the yeast Saccharomyces cerevisiae.	0.00903845	YBR248C,YCL030C,YER055C,YFR025C,YIL116W	10438744	5
Electron crystal structure of the transcription factor and DNA repair complex, core TFIIH.	0.00903845	YDL108W,YDR311W,YDR460W,YER171W,YLR005W	11007479	5
Conserved RNA polymerase II initiation complex structure.	0.0106408	YDL140C,YDR311W,YER148W,YER171W,YLR005W,YLR071C,YMR112C,YOR151C,YOR174W,YPR086W	28437704	10
A general path for large-scale solubilization of cellular proteins: from membrane receptors to multiprotein complexes.	0.0147377	YDL108W,YDL140C,YDR311W,YDR460W,YER171W,YLR005W,YOR151C	23137940	7
Uncoupling Promoter Opening from Start-Site Scanning.	0.0147377	YDL108W,YDL140C,YDR311W,YDR460W,YER171W,YLR005W,YOR151C	26073544	7
Strong functional interactions of TFIIH with XPC and XPG in human DNA nucleotide excision repair, without a preassembled repairosome.	0.0200266	YDL108W,YDR311W,YDR460W,YER171W,YLR005W	11259578	5
RNA polymerase transcription factor IIH holoenzyme from yeast.	0.0200266	YDL108W,YDR311W,YDR460W,YER171W,YLR005W	7961739	5
The multiple roles of transcription/repair factor TFIIH.	0.0200266	YDL108W,YDR311W,YDR460W,YER171W,YLR005W	8870499	5
Mechanisms of gene regulation in the general control of amino acid biosynthesis in Saccharomyces cerevisiae.	0.0243223	YCL030C,YER055C,YFR025C,YGL154C,YIL116W,YIR034C,YJL071W,YJL088W	3045517	8
Overlapping pathways dictate termination of RNA polymerase II transcription.	0.030321	YDL140C,YDR228C,YDR280W,YJL050W,YLR430W,YOL021C,YOR001W,YOR151C	17629387	8
Formation and fate of a complete 31-protein RNA polymerase II transcription preinitiation complex.	0.0390268	YDL108W,YDL140C,YDR311W,YDR460W,YER148W,YER171W,YLR005W,YOR151C,YPR086W	23303183	9
Ten years of TFIIH.	0.0394425	YDL108W,YDR311W,YDR460W,YER171W,YLR005W	10384274	5
Mms19 protein functions in nucleotide excision repair by sustaining an adequate cellular concentration of the TFIIH component Rad3.	0.0394425	YDL108W,YDR311W,YDR460W,YER171W,YLR005W	18836076	5
Yeast Pol II start-site selection: the long and the short of it.	0.0394425	YDL140C,YER148W,YJL130C,YLR430W,YPR086W	18846104	5
Subunit architecture of general transcription factor TFIIH.	0.0394425	YDL108W,YDR311W,YDR460W,YER171W,YLR005W	22308316	5
Structures of transcription pre-initiation complex with TFIIH and Mediator.	0.0394425	YDL108W,YDR311W,YDR460W,YER171W,YLR005W	29088706	5
The FACT complex travels with elongating RNA polymerase II and is important for the fidelity of transcriptional initiation in vivo.	0.0453272	YDL108W,YER148W,YML069W,YPR086W	14585989	4
Cluster_12
No enrichment found.
Cluster_13
No enrichment found.
Cluster_14
No enrichment found.
Cluster_15
DNA replication preinitiation complex	3.35872e-05	YBL023C,YBR060C,YHR118C,YJL072C,YJL090C	GO:0031261	5
protein-DNA complex	0.00619177	YBL023C,YBR060C,YHR118C,YJL072C,YJL090C	GO:0032993	5
nucleoplasm part	0.00844775	YBL023C,YBR060C,YDR359C,YHR058C,YHR118C,YJL072C,YJL090C,YKL139W	GO:0044451	8
chromosomal part	0.0146994	YBL023C,YBR060C,YBR156C,YDR288W,YHR118C,YJL072C,YJL090C,YKL139W,YLR045C,YMR094W	GO:0044427	10
nucleoplasm	0.0236706	YBL023C,YBR060C,YDR359C,YHR058C,YHR118C,YJL072C,YJL090C,YKL139W	GO:0005654	8
chromosome	0.0245192	YBL023C,YBR060C,YBR156C,YDR288W,YHR118C,YJL072C,YJL090C,YKL139W,YLR045C,YMR094W	GO:0005694	10
protein-containing complex	0.0302533	YBL023C,YBR060C,YBR156C,YDL217C,YDR288W,YDR292C,YDR299W,YDR359C,YER151C,YGL130W,YHR035W,YHR058C,YHR118C,YJL072C,YJL090C,YKL088W,YKL095W,YKL139W,YLR045C,YMR094W,YPR110C	GO:0032991	21
A comprehensive strategy enabling high-resolution functional analysis of the yeast genome.	6.90037e-05	YBL023C,YBR060C,YDL217C,YDR288W,YDR292C,YDR299W,YGL130W,YGR245C,YHR058C,YHR118C,YJL072C,YJL090C,YJR017C,YKL088W,YKL095W,YMR094W,YPR110C	18622397	17
Regulation of the initiation step of DNA replication by cyclin-dependent kinases.	0.00179746	YBL023C,YBR060C,YHR118C,YJL072C,YJL090C	20686781	5
Initiation of DNA replication: functional and evolutionary aspects.	0.00276703	YBL023C,YBR060C,YHR118C,YJL072C,YJL090C	21508040	5
Diverse roles of Dpb2, the non-catalytic subunit of DNA polymerase ε.	0.00979971	YBL023C,YBR060C,YHR118C,YJL072C,YJL090C	28516230	5
Enigmatic variations: divergent modes of regulating eukaryotic DNA replication.	0.0133331	YBL023C,YBR060C,YHR118C,YJL072C,YJL090C	14636567	5
The many faces of redundancy in DNA replication control.	0.0236607	YBL023C,YBR060C,YHR118C,YJL090C	21502406	4
Differences in the DNA replication of unicellular eukaryotes and metazoans: known unknowns.	0.0266684	YBL023C,YBR060C,YHR118C,YJL072C,YJL090C	20203697	5
Comparative analysis of the molecular mechanisms controlling the initiation of chromosomal DNA replication in yeast and in mammalian cells.	0.0266684	YBL023C,YBR060C,YHR118C,YJL072C,YJL090C	21963686	5
Stepwise assembly of initiation proteins at budding yeast replication origins in vitro.	0.0386865	YBL023C,YBR060C,YHR118C	11121019	3
A new MCM modification cycle regulates DNA replication initiation.	0.0395684	YBL023C,YBR060C,YHR118C,YJL072C	26854664	4
