# Supplementary figures and images for: Genetic profiling of protein burden and nuclear export overload
Source: eLife journal article supplement (doi:10.7554/elife.54080), 2020-11-04

Figure 5-figure supplement 2

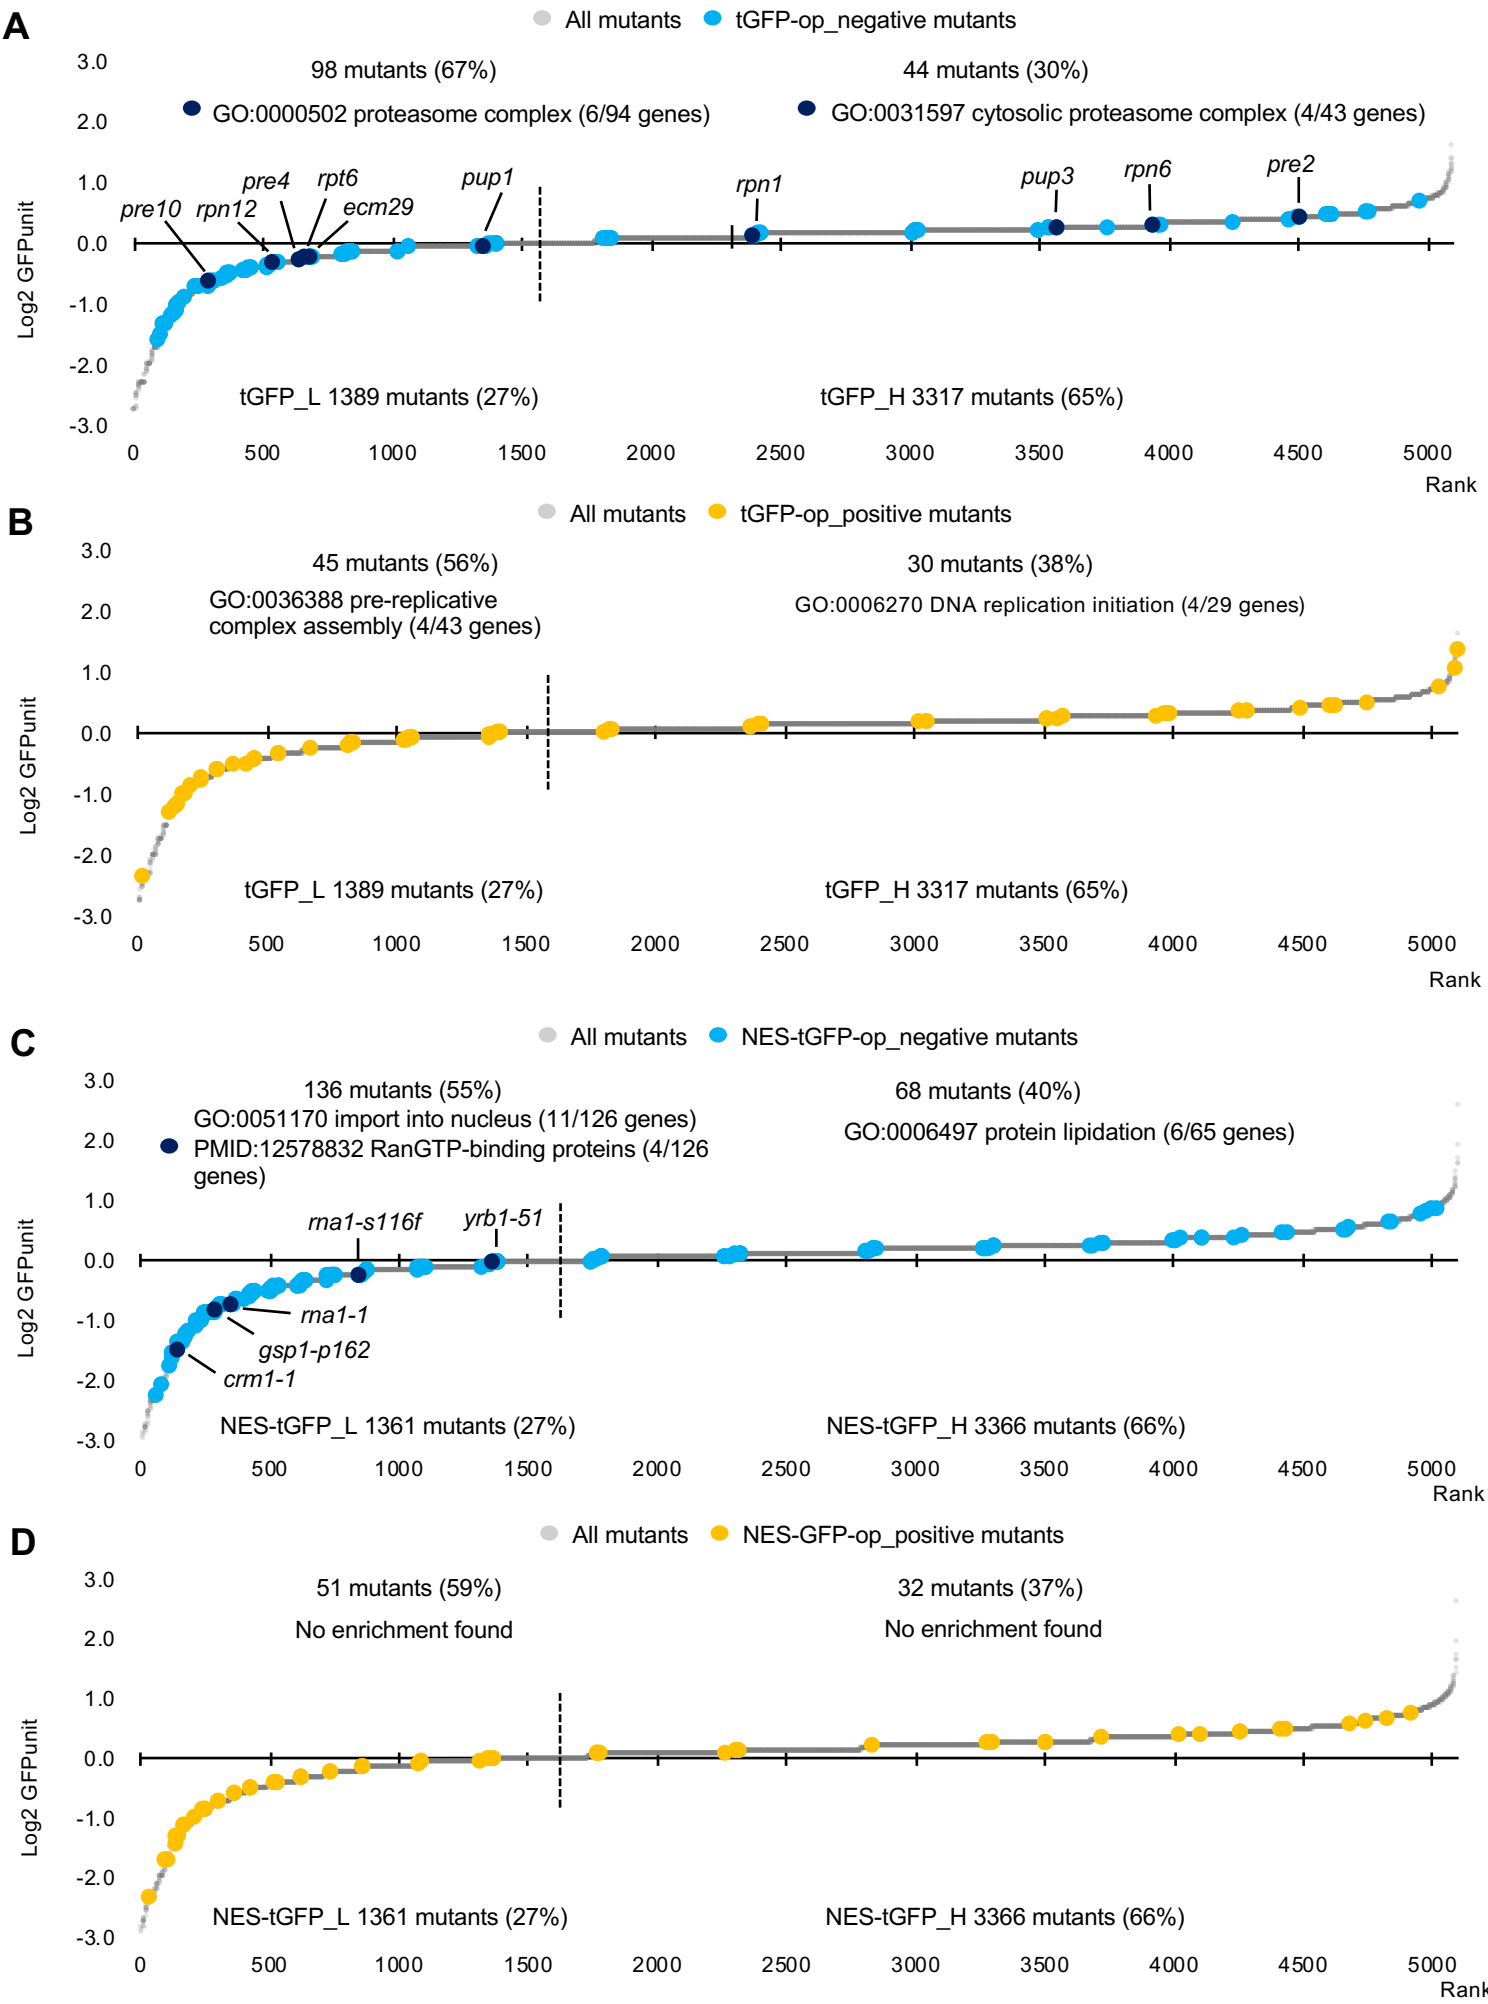

Supplement: supp [file elife-54080-supp-v1.zip]

Figure 2-figure supplement 1

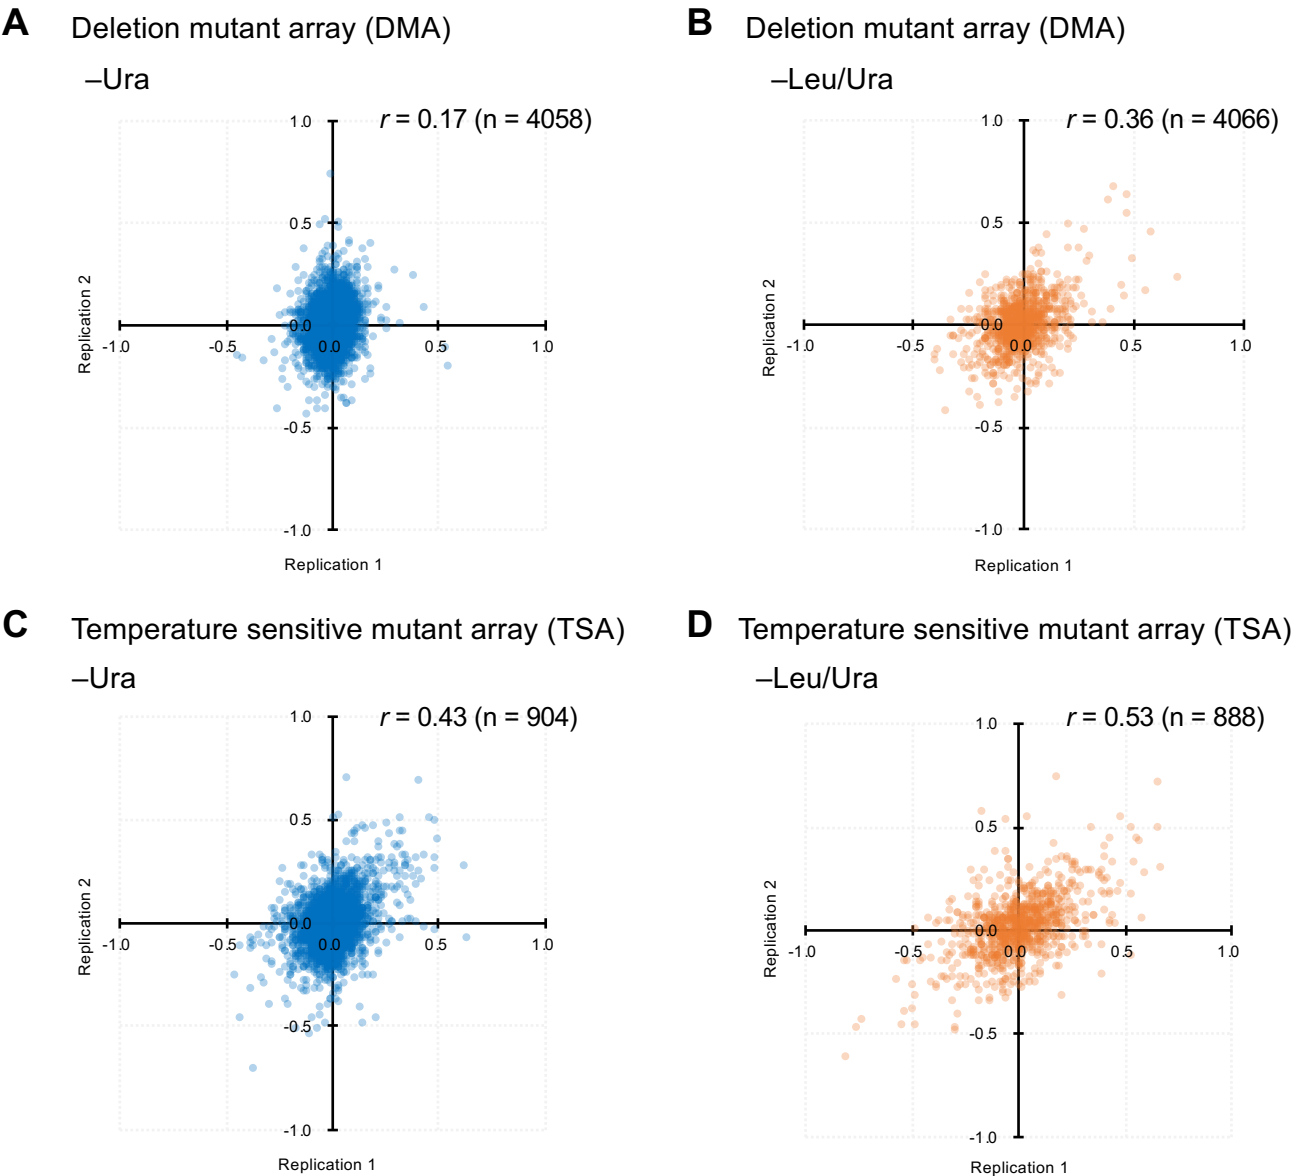

Supplement: supp [file elife-54080-supp-v1.zip]

Figure 1-figure supplement 1

**A**

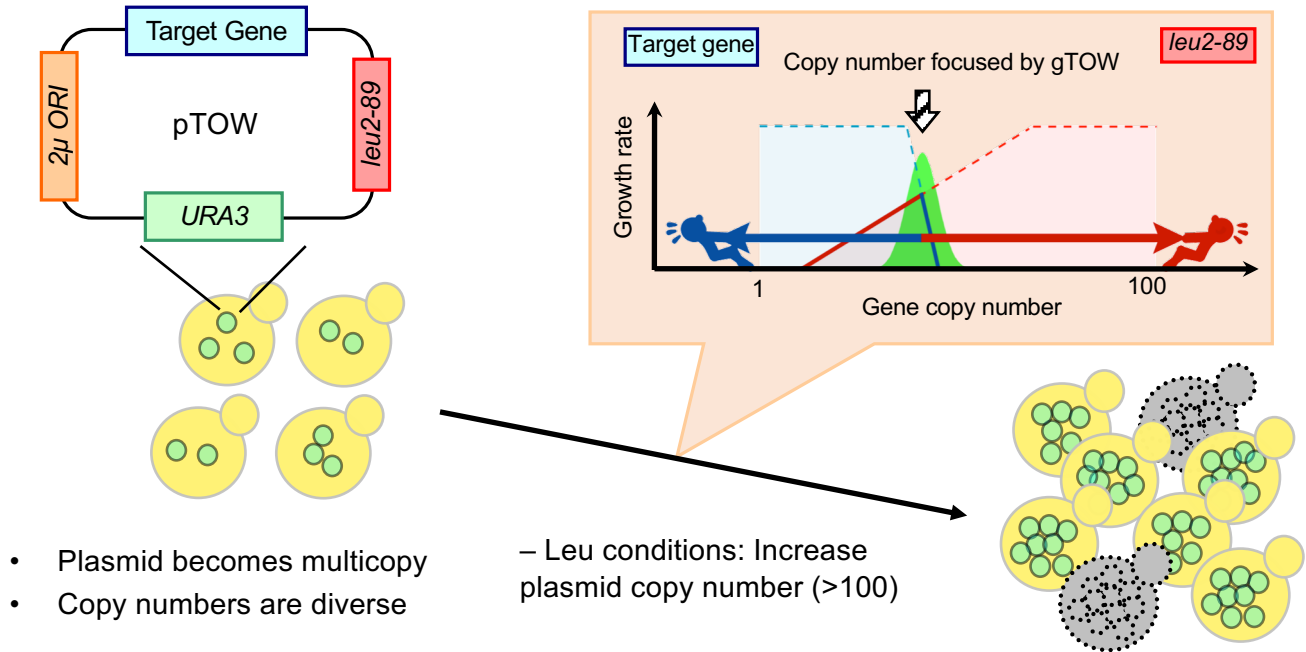

**B**

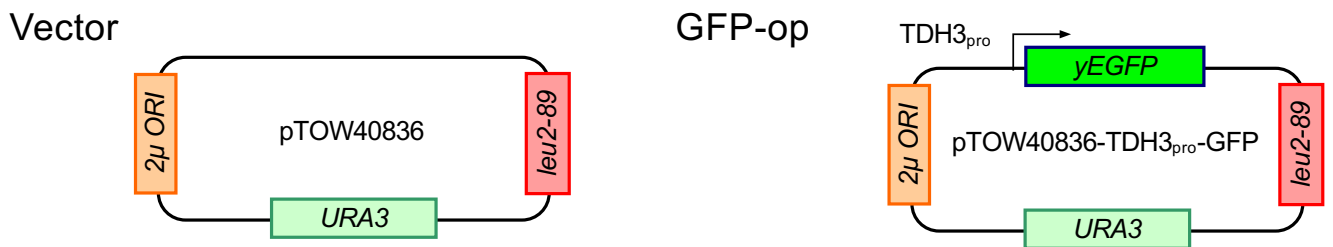

**C**

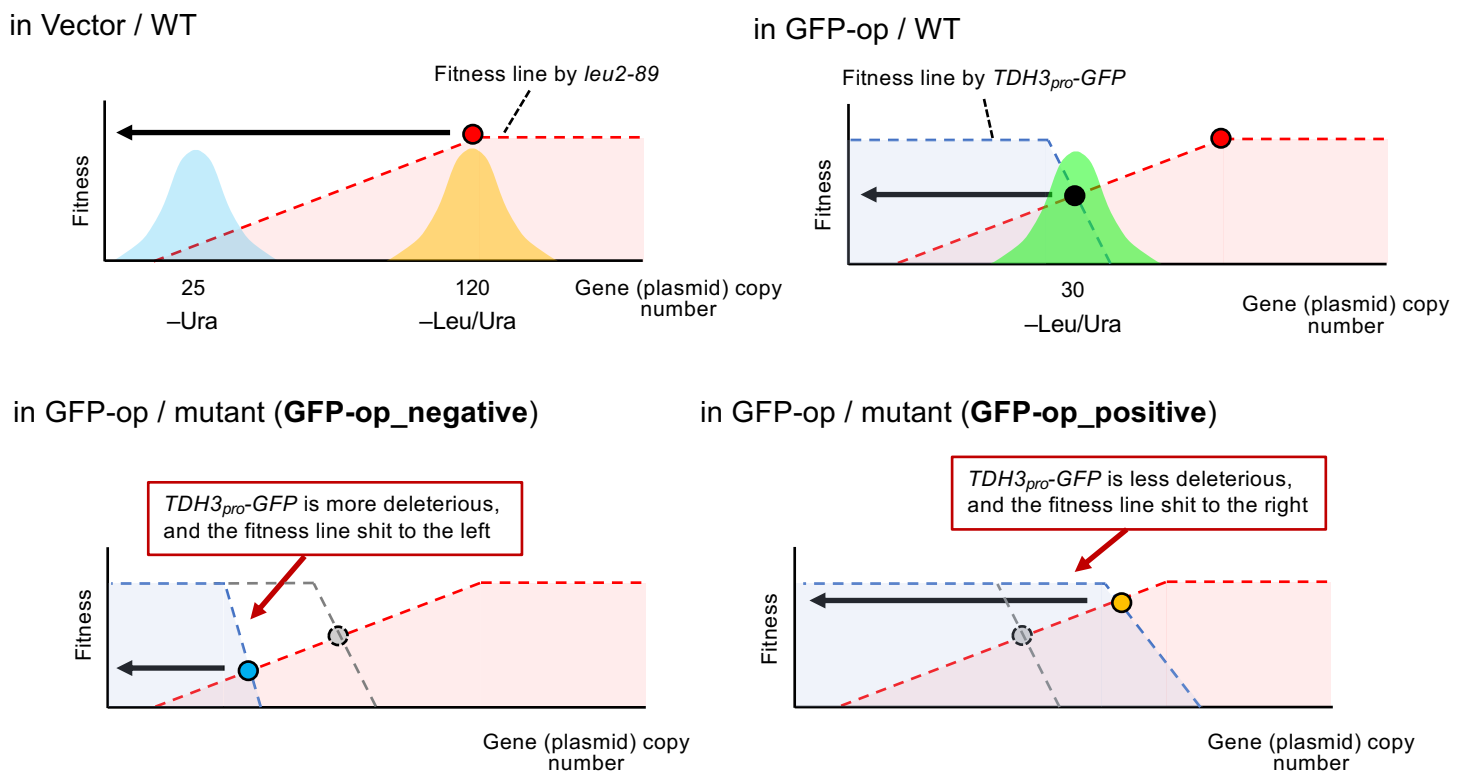

Supplement: supp [file elife-54080-supp-v1.zip]

Figure 4-figure supplement 2

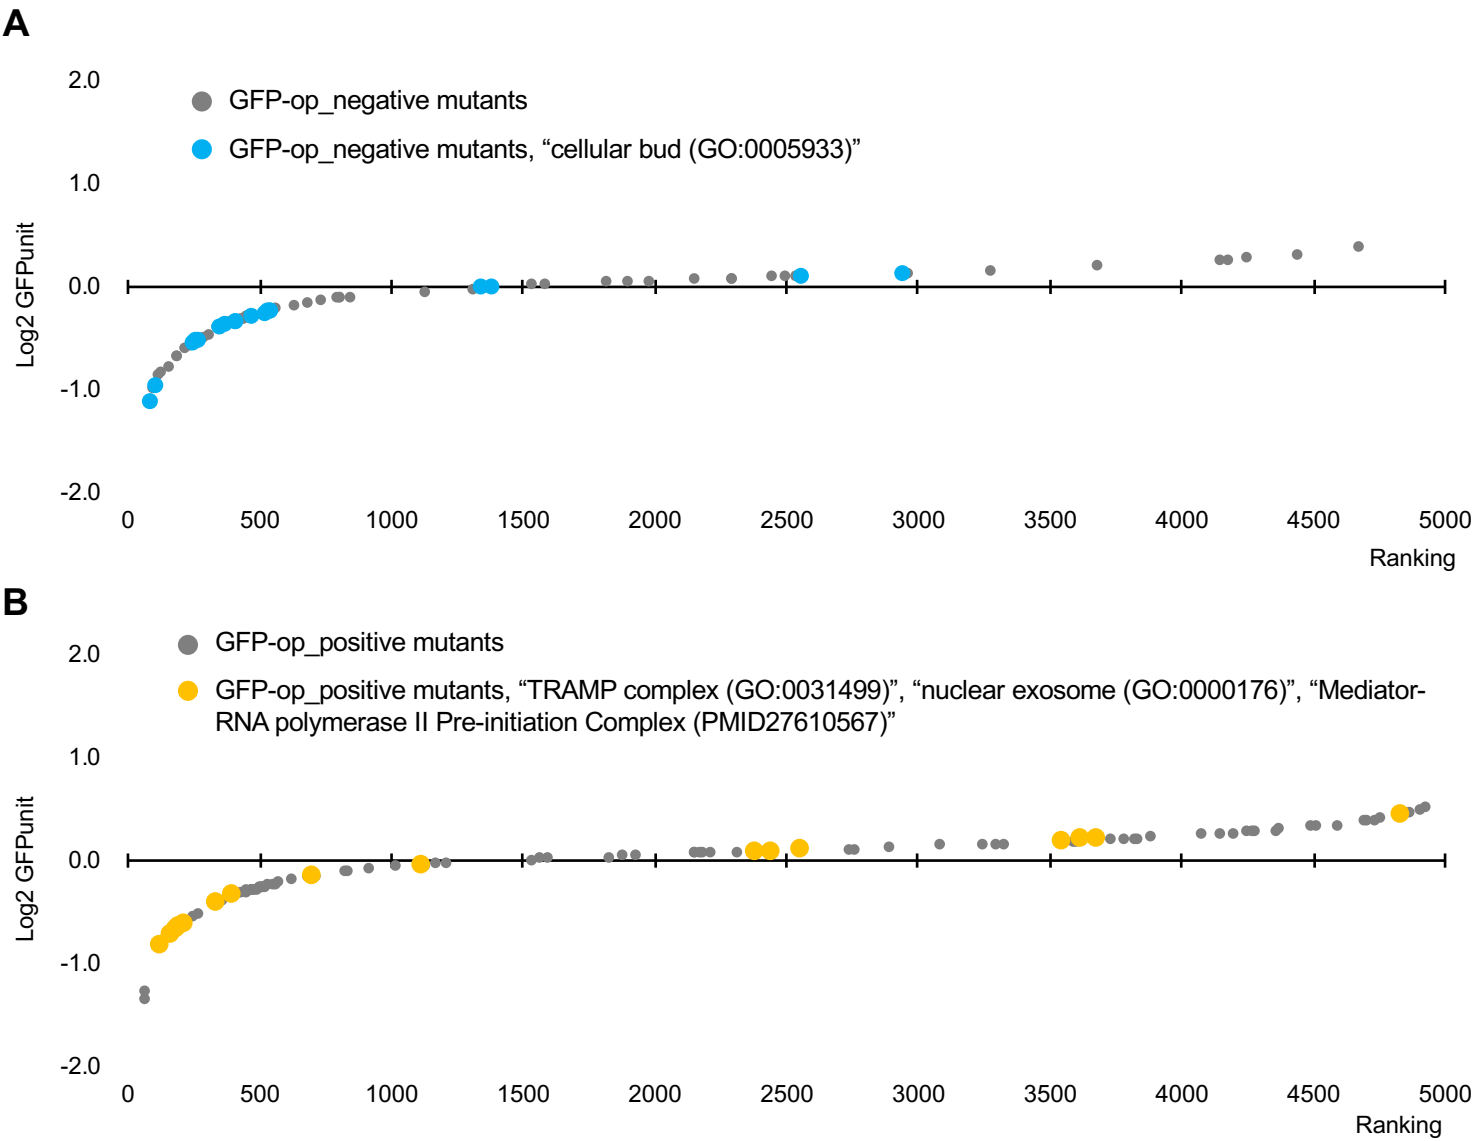

Supplement: supp [file elife-54080-supp-v1.zip]

**A** Deletion mutant array (DMA)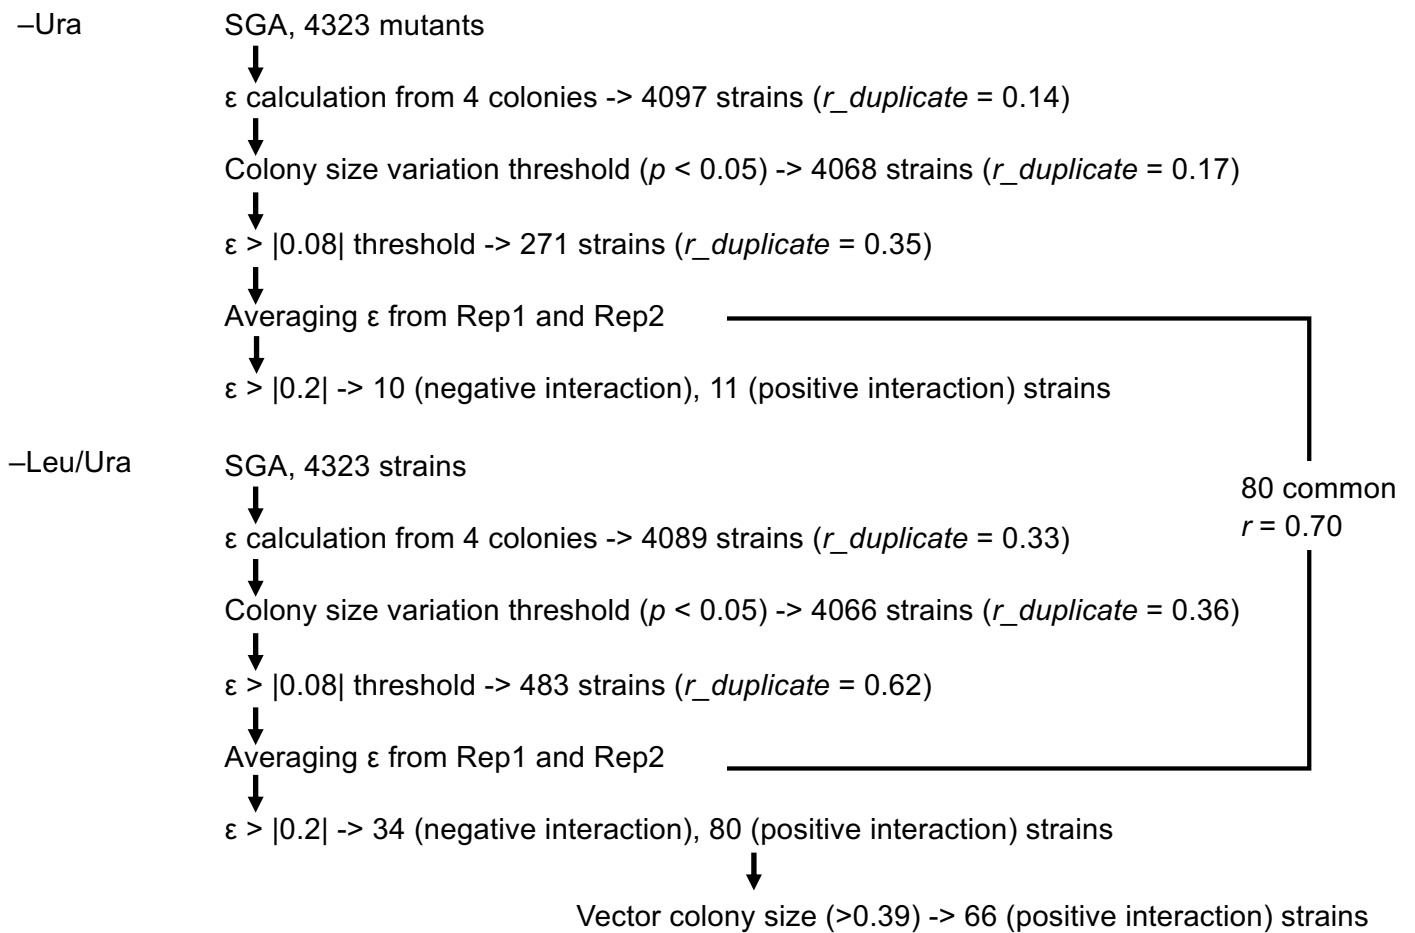**B** Temperature sensitive mutant array (TSA)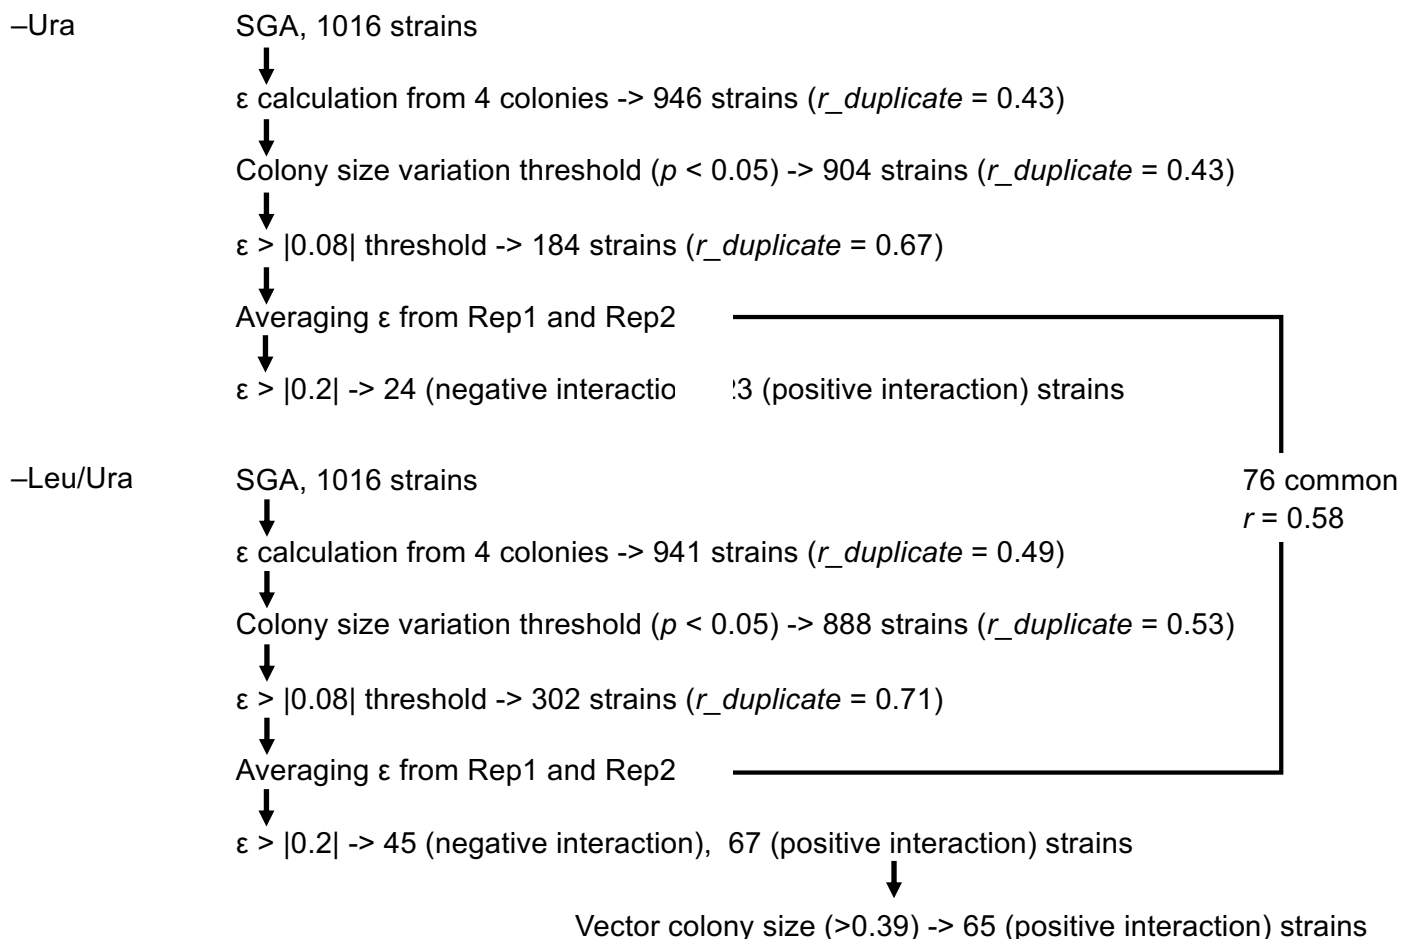

Supplement: supp [file elife-54080-supp-v1.zip]

Figure 6-figure supplement 1

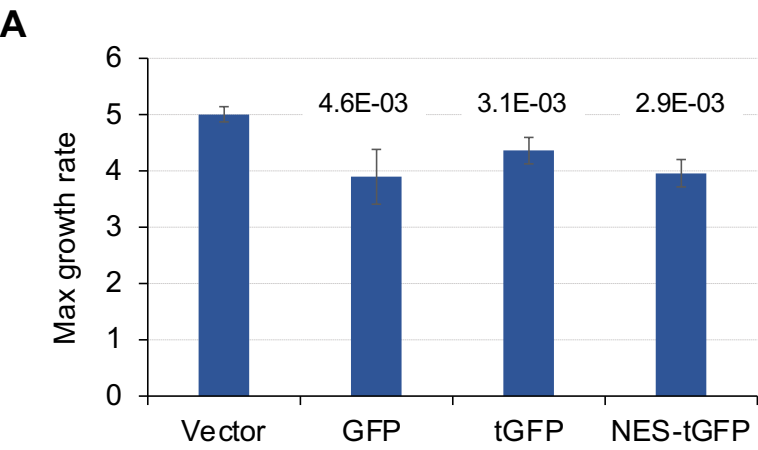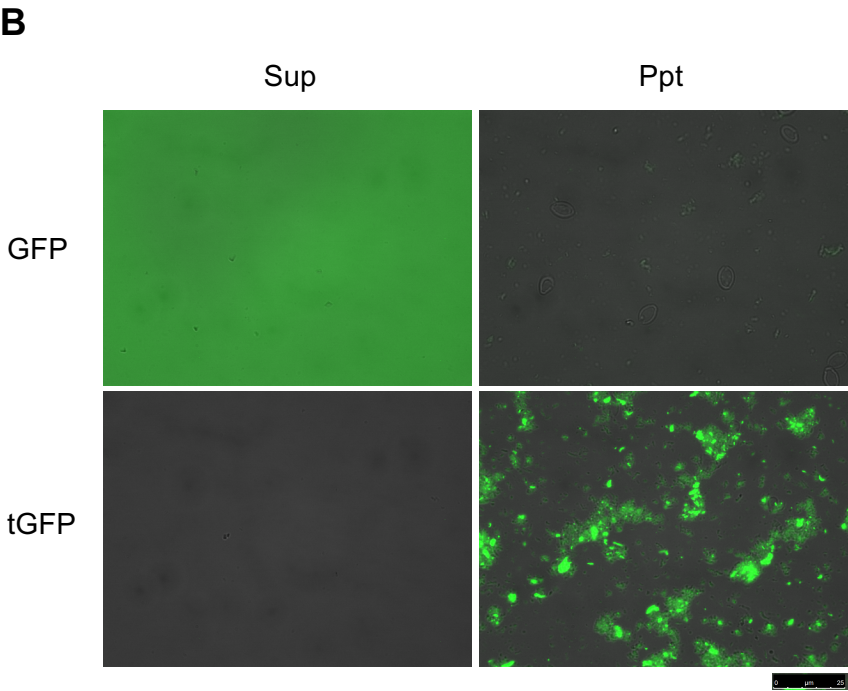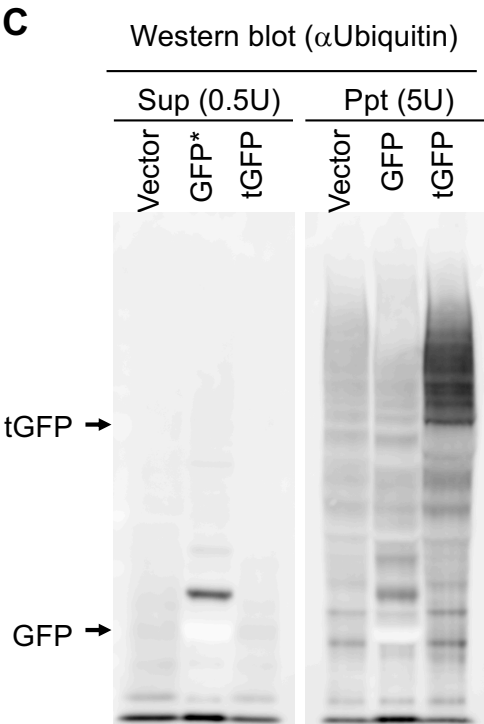

Supplement: supp [file elife-54080-supp-v1.zip]

Figure 2-figure supplement 3

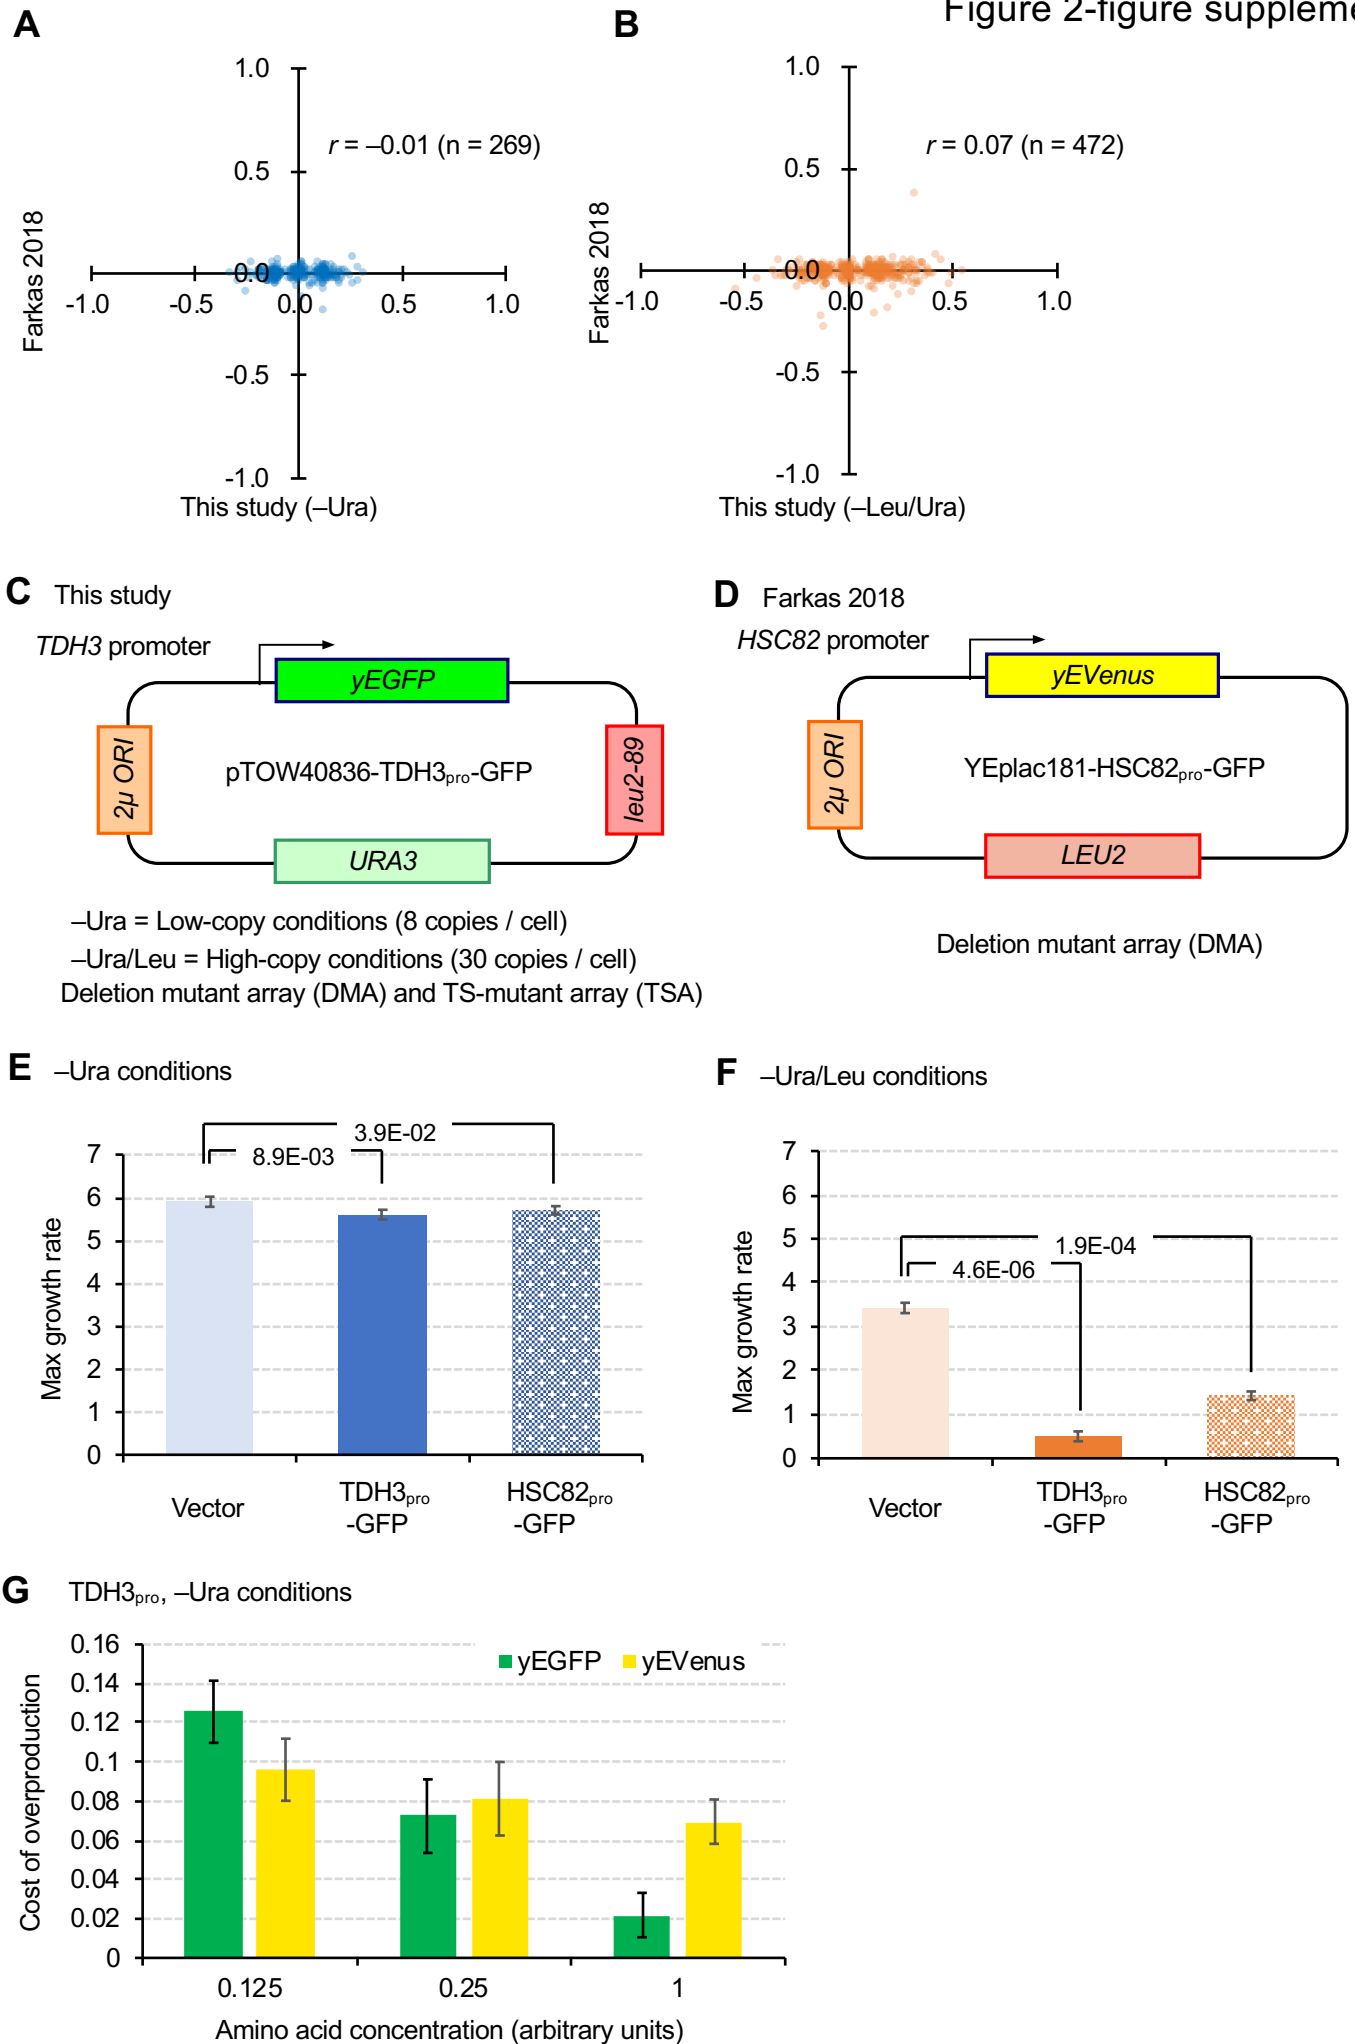

Supplement: supp [file elife-54080-supp-v1.zip]

Figure 4-figure supplement 3

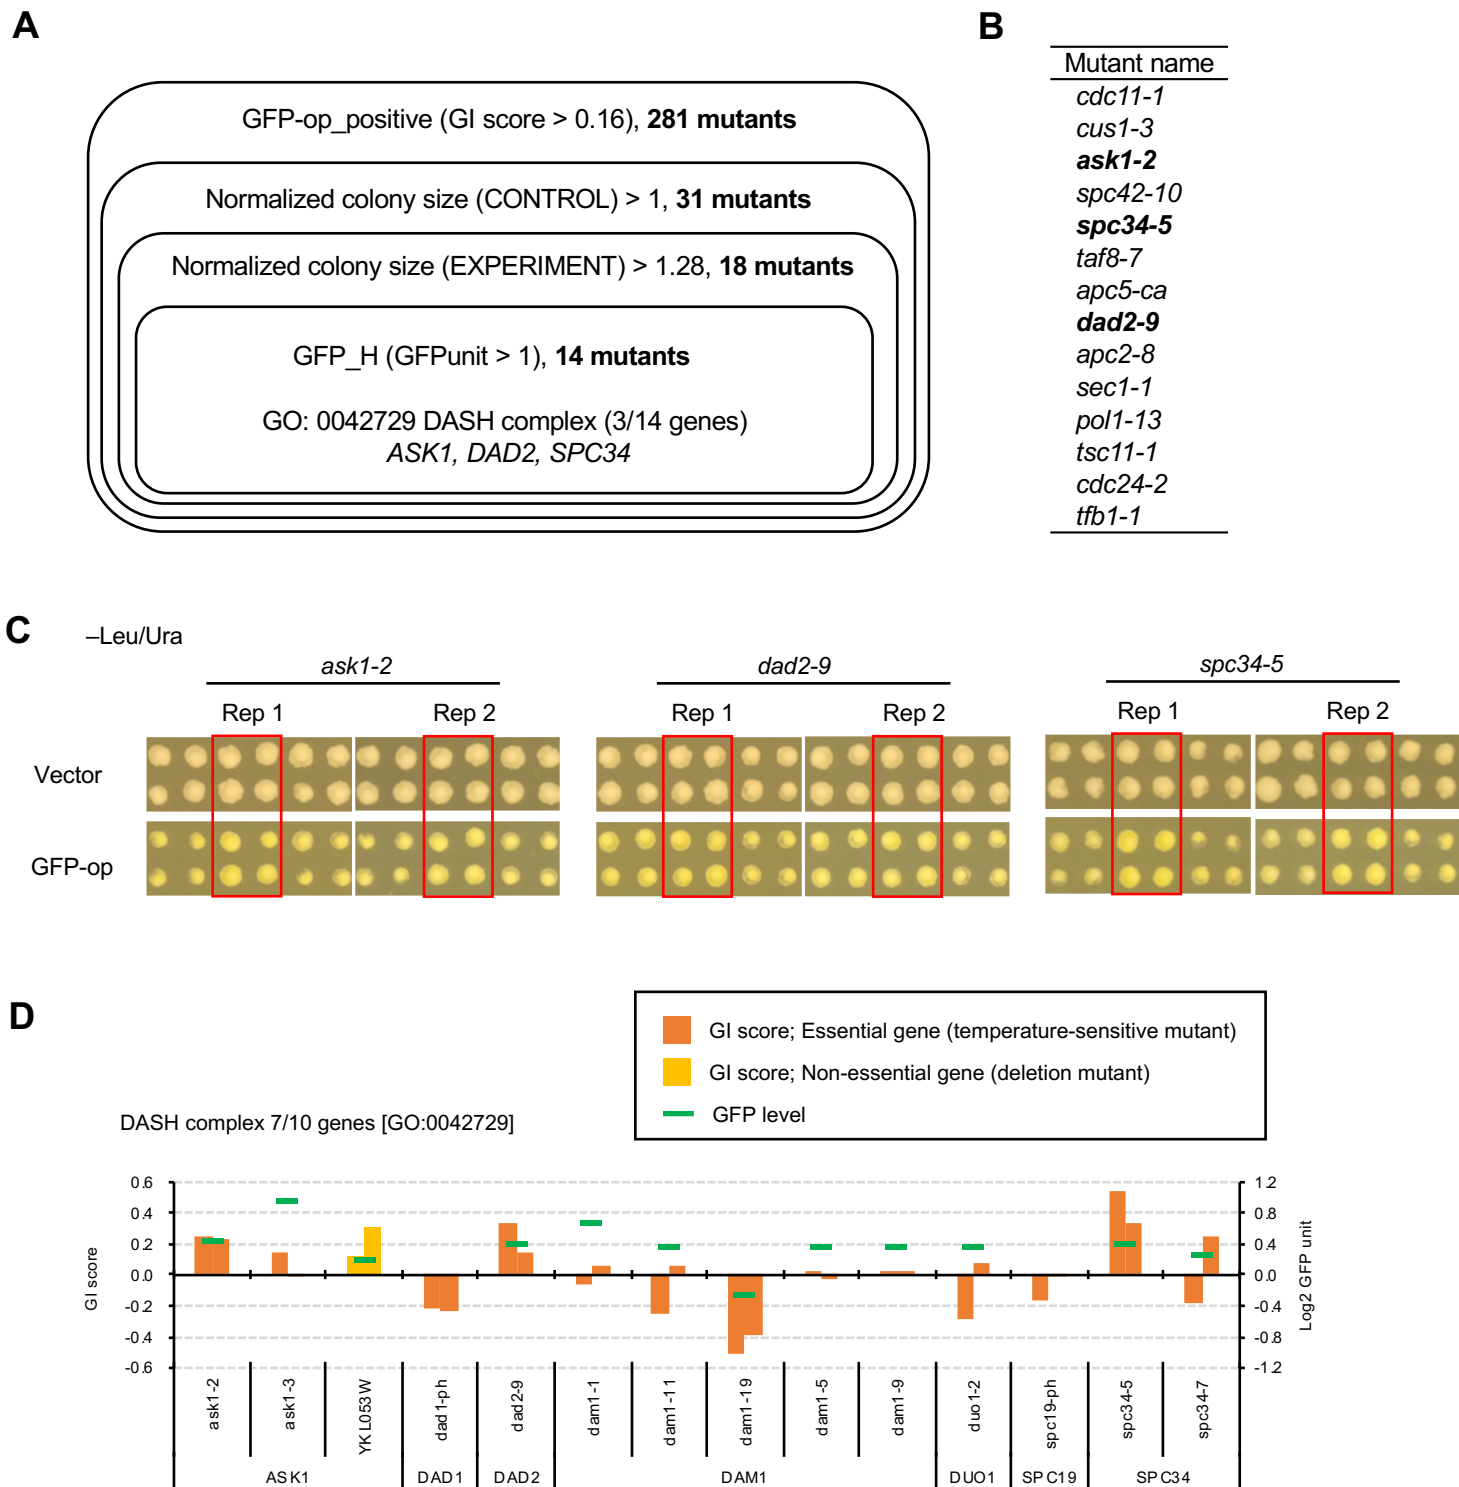

Supplement: supp [file elife-54080-supp-v1.zip › elife_poa_e54080_Figure_4_figure_supplement_3.pdf]

Figure 7-figure supplement 1

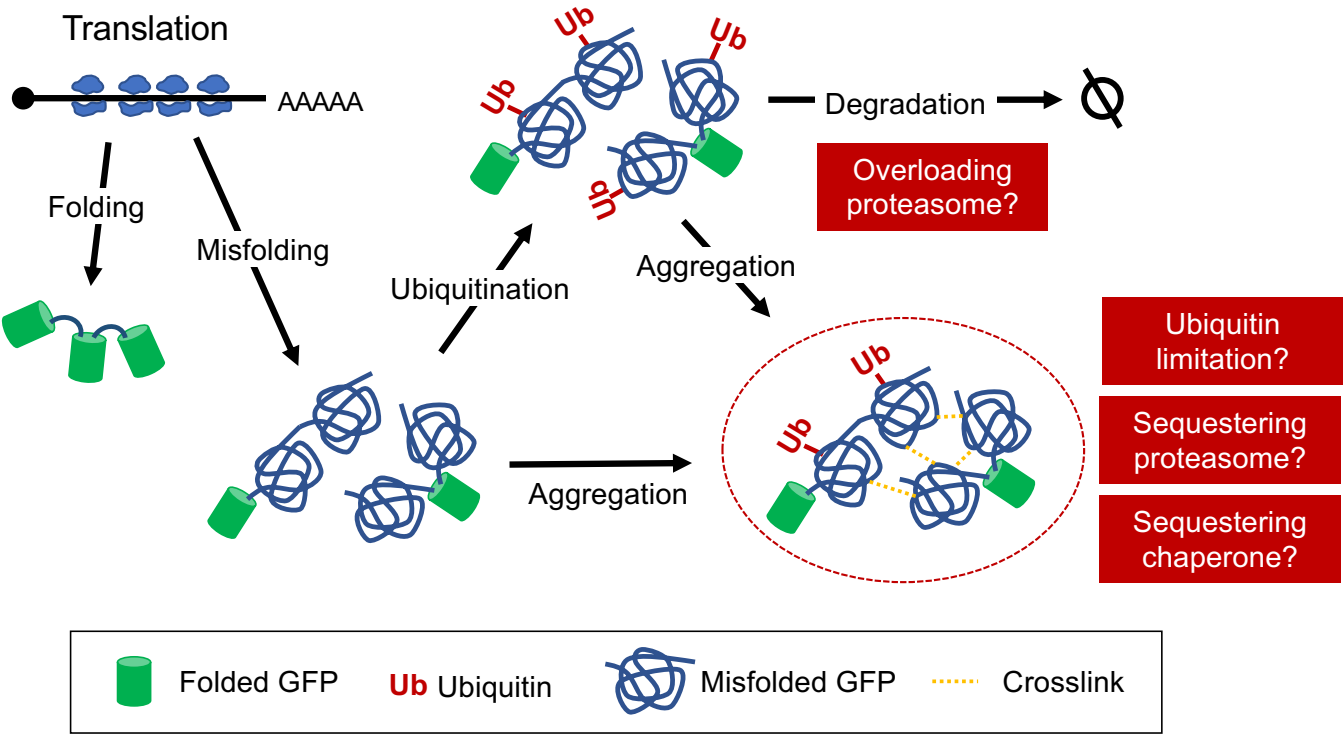

Supplement: supp [file elife-54080-supp-v1.zip › elife_poa_e54080_Figure_7_figure_supplement_1.pdf]
